# Supplementary material for: Circulating Levels of the Short-Chain Fatty Acid Acetate Mediate the Effect of the Gut Microbiome on Visceral Fat
Source: Front Microbiol. 2021 Jul 15;12:711359. doi: 10.3389/fmicb.2021.711359 (PMC8320334; doi:10.3389/fmicb.2021.711359)
Supplement: Supplementary file 3 [file Table_3.XLSX]

## Sheet: Coprococcus_Part1
Query	Reference	ANI	Count_bidirectional_fragment_mappings	Total_query_fragments	Alignment_fraction
GCF_009875795.1	GUT_GENOME251225	98.9846	827	1069	0.77362
GCF_009875795.1	GUT_GENOME238486	98.9497	826	1069	0.772685
GCF_009875795.1	GUT_GENOME190482	98.9208	843	1069	0.788587
GCF_009875795.1	GUT_GENOME189635	98.8946	851	1069	0.796071
GCF_009875795.1	GUT_GENOME077038	98.8433	808	1069	0.755847
GCF_009875795.1	GUT_GENOME210750	98.8423	840	1069	0.785781
GCF_009875795.1	GUT_GENOME067732	98.8386	805	1069	0.75304
GCF_009875795.1	GUT_GENOME005303	98.8297	795	1069	0.743686
GCF_009875795.1	GUT_GENOME210738	98.8167	855	1069	0.799813
GCF_009875795.1	GUT_GENOME194465	98.8094	840	1069	0.785781
GCF_009875795.1	GUT_GENOME192368	98.8052	814	1069	0.761459
GCF_009875795.1	GUT_GENOME209754	98.8049	776	1069	0.725912
GCF_009875795.1	GUT_GENOME219441	98.8034	793	1069	0.741815
GCF_009875795.1	GUT_GENOME189150	98.796	782	1069	0.731525
GCF_009875795.1	GUT_GENOME100934	98.7959	841	1069	0.786717
GCF_009875795.1	GUT_GENOME209678	98.7952	752	1069	0.703461
GCF_009875795.1	GUT_GENOME175537	98.7941	827	1069	0.77362
GCF_009875795.1	GUT_GENOME194570	98.7872	843	1069	0.788587
GCF_009875795.1	GUT_GENOME208418	98.7827	773	1069	0.723106
GCF_009875795.1	GUT_GENOME217894	98.7739	864	1069	0.808232
GCF_009875795.1	GUT_GENOME244906	98.772	843	1069	0.788587
GCF_009875795.1	GUT_GENOME283233	98.7694	798	1069	0.746492
GCF_009875795.1	GUT_GENOME208924	98.7691	859	1069	0.803555
GCF_009875795.1	GUT_GENOME247281	98.7683	861	1069	0.805426
GCF_009875795.1	GUT_GENOME112532	98.7668	860	1069	0.80449
GCF_009875795.1	GUT_GENOME270163	98.7645	866	1069	0.810103
GCF_009875795.1	GUT_GENOME130723	98.7634	842	1069	0.787652
GCF_009875795.1	GUT_GENOME243492	98.7584	839	1069	0.784846
GCF_009875795.1	GUT_GENOME023806	98.7583	801	1069	0.749298
GCF_009875795.1	GUT_GENOME004204	98.7556	827	1069	0.77362
GCF_009875795.1	GUT_GENOME259926	98.755	866	1069	0.810103
GCF_009875795.1	GUT_GENOME213075	98.7547	749	1069	0.700655
GCF_009875795.1	GUT_GENOME253046	98.7536	868	1069	0.811974
GCF_009875795.1	GUT_GENOME210765	98.7523	835	1069	0.781104
GCF_009875795.1	GUT_GENOME136190	98.7504	836	1069	0.782039
GCF_009875795.1	GUT_GENOME076164	98.7493	818	1069	0.765201
GCF_009875795.1	GUT_GENOME113792	98.7489	832	1069	0.778297
GCF_009875795.1	GUT_GENOME259790	98.7468	816	1069	0.76333
GCF_009875795.1	GUT_GENOME133686	98.7454	868	1069	0.811974
GCF_009875795.1	GUT_GENOME110913	98.7448	857	1069	0.801684
GCF_009875795.1	GUT_GENOME258887	98.743	850	1069	0.795136
GCF_009875795.1	GUT_GENOME102333	98.7429	798	1069	0.746492
GCF_009875795.1	GUT_GENOME196567	98.7423	866	1069	0.810103
GCF_009875795.1	GUT_GENOME020549	98.7408	839	1069	0.784846
GCF_009875795.1	GUT_GENOME268571	98.7383	823	1069	0.769878
GCF_009875795.1	GUT_GENOME221986	98.7382	789	1069	0.738073
GCF_009875795.1	GUT_GENOME197978	98.7379	804	1069	0.752105
GCF_009875795.1	GUT_GENOME130700	98.7375	780	1069	0.729654
GCF_009875795.1	GUT_GENOME192962	98.7366	843	1069	0.788587
GCF_009875795.1	GUT_GENOME003630	98.7357	848	1069	0.793265
GCF_009875795.1	GUT_GENOME138019	98.7333	829	1069	0.775491
GCF_009875795.1	GUT_GENOME134156	98.7331	802	1069	0.750234
GCF_009875795.1	GUT_GENOME112343	98.7297	829	1069	0.775491
GCF_009875795.1	GUT_GENOME008774	98.7293	870	1069	0.813845
GCF_009875795.1	GUT_GENOME109883	98.7261	840	1069	0.785781
GCF_009875795.1	GUT_GENOME068387	98.726	778	1069	0.727783
GCF_009875795.1	GUT_GENOME114656	98.7242	847	1069	0.792329
GCF_009875795.1	GUT_GENOME022465	98.7238	837	1069	0.782975
GCF_009875795.1	GUT_GENOME271319	98.7235	757	1069	0.708138
GCF_009875795.1	GUT_GENOME021431	98.722	841	1069	0.786717
GCF_009875795.1	GUT_GENOME126276	98.7217	862	1069	0.806361
GCF_009875795.1	GUT_GENOME067208	98.7217	811	1069	0.758653
GCF_009875795.1	GUT_GENOME100777	98.7215	804	1069	0.752105
GCF_009875795.1	GUT_GENOME066316	98.7195	811	1069	0.758653
GCF_009875795.1	GUT_GENOME091443	98.7189	821	1069	0.768007
GCF_009875795.1	GUT_GENOME216624	98.7186	764	1069	0.714687
GCF_009875795.1	GUT_GENOME193767	98.7175	840	1069	0.785781
GCF_009875795.1	GUT_GENOME110179	98.7171	812	1069	0.759588
GCF_009875795.1	GUT_GENOME009179	98.7164	857	1069	0.801684
GCF_009875795.1	GUT_GENOME208389	98.7148	813	1069	0.760524
GCF_009875795.1	GUT_GENOME112461	98.714	851	1069	0.796071
GCF_009875795.1	GUT_GENOME286283	98.7127	857	1069	0.801684
GCF_009875795.1	GUT_GENOME272875	98.7127	850	1069	0.795136
GCF_009875795.1	GUT_GENOME026110	98.7124	804	1069	0.752105
GCF_009875795.1	GUT_GENOME243213	98.7122	809	1069	0.756782
GCF_009875795.1	GUT_GENOME257150	98.7106	855	1069	0.799813
GCF_009875795.1	GUT_GENOME059061	98.7104	822	1069	0.768943
GCF_009875795.1	GUT_GENOME196832	98.7076	843	1069	0.788587
GCF_009875795.1	GUT_GENOME072453	98.707	817	1069	0.764266
GCF_009875795.1	GUT_GENOME282292	98.7068	847	1069	0.792329
GCF_009875795.1	GUT_GENOME112073	98.705	827	1069	0.77362
GCF_009875795.1	GUT_GENOME260737	98.7045	834	1069	0.780168
GCF_009875795.1	GUT_GENOME139205	98.7041	854	1069	0.798877
GCF_009875795.1	GUT_GENOME109942	98.7036	868	1069	0.811974
GCF_009875795.1	GUT_GENOME106106	98.7034	859	1069	0.803555
GCF_009875795.1	GUT_GENOME255937	98.7032	845	1069	0.790458
GCF_009875795.1	GUT_GENOME238029	98.7029	838	1069	0.78391
GCF_009875795.1	GUT_GENOME093550	98.7019	863	1069	0.807297
GCF_009875795.1	GUT_GENOME186763	98.7018	823	1069	0.769878
GCF_009875795.1	GUT_GENOME133938	98.7018	860	1069	0.80449
GCF_009875795.1	GUT_GENOME010670	98.7013	844	1069	0.789523
GCF_009875795.1	GUT_GENOME208727	98.7009	884	1069	0.826941
GCF_009875795.1	GUT_GENOME271979	98.6999	836	1069	0.782039
GCF_009875795.1	GUT_GENOME269489	98.6996	856	1069	0.800748
GCF_009875795.1	GUT_GENOME121785	98.6989	859	1069	0.803555
GCF_009875795.1	GUT_GENOME163483	98.6974	793	1069	0.741815
GCF_009875795.1	GUT_GENOME002014	98.6973	826	1069	0.772685
GCF_009875795.1	GUT_GENOME117028	98.6972	793	1069	0.741815
GCF_009875795.1	GUT_GENOME074158	98.6972	843	1069	0.788587
GCF_009875795.1	GUT_GENOME271655	98.6969	859	1069	0.803555
GCF_009875795.1	GUT_GENOME265440	98.6955	806	1069	0.753976
GCF_009875795.1	GUT_GENOME272903	98.6954	855	1069	0.799813
GCF_009875795.1	GUT_GENOME010082	98.6951	851	1069	0.796071
GCF_009875795.1	GUT_GENOME253824	98.6945	853	1069	0.797942
GCF_009875795.1	GUT_GENOME196289	98.6937	789	1069	0.738073
GCF_009875795.1	GUT_GENOME278681	98.6937	723	1069	0.676333
GCF_009875795.1	GUT_GENOME112936	98.6934	841	1069	0.786717
GCF_009875795.1	GUT_GENOME133865	98.6921	853	1069	0.797942
GCF_009875795.1	GUT_GENOME246149	98.692	865	1069	0.809167
GCF_009875795.1	GUT_GENOME111000	98.6918	817	1069	0.764266
GCF_009875795.1	GUT_GENOME003464	98.6911	819	1069	0.766137
GCF_009875795.1	GUT_GENOME196432	98.6901	817	1069	0.764266
GCF_009875795.1	GUT_GENOME268646	98.6889	825	1069	0.771749
GCF_009875795.1	GUT_GENOME111083	98.6873	842	1069	0.787652
GCF_009875795.1	GUT_GENOME091211	98.686	801	1069	0.749298
GCF_009875795.1	GUT_GENOME075207	98.6848	797	1069	0.745557
GCF_009875795.1	GUT_GENOME071199	98.6846	751	1069	0.702526
GCF_009875795.1	GUT_GENOME103915	98.6844	833	1069	0.779233
GCF_009875795.1	GUT_GENOME136219	98.6843	848	1069	0.793265
GCF_009875795.1	GUT_GENOME253516	98.6838	841	1069	0.786717
GCF_009875795.1	GUT_GENOME164006	98.6836	802	1069	0.750234
GCF_009875795.1	GUT_GENOME282697	98.6835	796	1069	0.744621
GCF_009875795.1	GUT_GENOME067364	98.682	844	1069	0.789523
GCF_009875795.1	GUT_GENOME271800	98.6795	863	1069	0.807297
GCF_009875795.1	GUT_GENOME268386	98.6789	852	1069	0.797007
GCF_009875795.1	GUT_GENOME126439	98.6781	875	1069	0.818522
GCF_009875795.1	GUT_GENOME115704	98.6781	854	1069	0.798877
GCF_009875795.1	GUT_GENOME109285	98.6778	766	1069	0.716558
GCF_009875795.1	GUT_GENOME109664	98.6772	869	1069	0.812909
GCF_009875795.1	GUT_GENOME280173	98.6764	833	1069	0.779233
GCF_009875795.1	GUT_GENOME258547	98.6762	832	1069	0.778297
GCF_009875795.1	GUT_GENOME258475	98.676	859	1069	0.803555
GCF_009875795.1	GUT_GENOME068707	98.6759	799	1069	0.747428
GCF_009875795.1	GUT_GENOME073973	98.6759	835	1069	0.781104
GCF_009875795.1	GUT_GENOME255569	98.6752	869	1069	0.812909
GCF_009875795.1	GUT_GENOME158959	98.6744	863	1069	0.807297
GCF_009875795.1	GUT_GENOME019676	98.6744	774	1069	0.724041
GCF_009875795.1	GUT_GENOME178928	98.6741	842	1069	0.787652
GCF_009875795.1	GUT_GENOME056725	98.6711	780	1069	0.729654
GCF_009875795.1	GUT_GENOME186497	98.6708	739	1069	0.6913
GCF_009875795.1	GUT_GENOME019361	98.6703	855	1069	0.799813
GCF_009875795.1	GUT_GENOME195922	98.6698	685	1069	0.640786
GCF_009875795.1	GUT_GENOME247510	98.6693	862	1069	0.806361
GCF_009875795.1	GUT_GENOME166107	98.6688	893	1069	0.83536
GCF_009875795.1	GUT_GENOME111840	98.6681	830	1069	0.776427
GCF_009875795.1	GUT_GENOME273164	98.6675	858	1069	0.802619
GCF_009875795.1	GUT_GENOME277922	98.6667	853	1069	0.797942
GCF_009875795.1	GUT_GENOME251124	98.6659	852	1069	0.797007
GCF_009875795.1	GUT_GENOME266421	98.6656	838	1069	0.78391
GCF_009875795.1	GUT_GENOME282415	98.6647	868	1069	0.811974
GCF_009875795.1	GUT_GENOME002000	98.6647	852	1069	0.797007
GCF_009875795.1	GUT_GENOME188557	98.6635	841	1069	0.786717
GCF_009875795.1	GUT_GENOME265059	98.6633	847	1069	0.792329
GCF_009875795.1	GUT_GENOME020202	98.6628	772	1069	0.72217
GCF_009875795.1	GUT_GENOME111634	98.6628	784	1069	0.733396
GCF_009875795.1	GUT_GENOME161752	98.6616	841	1069	0.786717
GCF_009875795.1	GUT_GENOME194478	98.6607	803	1069	0.751169
GCF_009875795.1	GUT_GENOME112850	98.6606	861	1069	0.805426
GCF_009875795.1	GUT_GENOME272934	98.6605	827	1069	0.77362
GCF_009875795.1	GUT_GENOME273077	98.6603	859	1069	0.803555
GCF_009875795.1	GUT_GENOME010758	98.6591	856	1069	0.800748
GCF_009875795.1	GUT_GENOME027038	98.6589	815	1069	0.762395
GCF_009875795.1	GUT_GENOME090850	98.6587	823	1069	0.769878
GCF_009875795.1	GUT_GENOME066754	98.6581	854	1069	0.798877
GCF_009875795.1	GUT_GENOME133088	98.6573	818	1069	0.765201
GCF_009875795.1	GUT_GENOME251430	98.6562	847	1069	0.792329
GCF_009875795.1	GUT_GENOME239588	98.6548	802	1069	0.750234
GCF_009875795.1	GUT_GENOME235318	98.6543	835	1069	0.781104
GCF_009875795.1	GUT_GENOME113294	98.6542	802	1069	0.750234
GCF_009875795.1	GUT_GENOME259128	98.6528	838	1069	0.78391
GCF_009875795.1	GUT_GENOME106014	98.6515	848	1069	0.793265
GCF_009875795.1	GUT_GENOME107444	98.6508	746	1069	0.697848
GCF_009875795.1	GUT_GENOME008999	98.6508	800	1069	0.748363
GCF_009875795.1	GUT_GENOME136702	98.6486	796	1069	0.744621
GCF_009875795.1	GUT_GENOME117994	98.6484	839	1069	0.784846
GCF_009875795.1	GUT_GENOME258271	98.6482	822	1069	0.768943
GCF_009875795.1	GUT_GENOME270040	98.6482	865	1069	0.809167
GCF_009875795.1	GUT_GENOME111759	98.6476	861	1069	0.805426
GCF_009875795.1	GUT_GENOME000172	98.6471	911	1069	0.852198
GCF_009875795.1	GUT_GENOME286680	98.647	839	1069	0.784846
GCF_009875795.1	GUT_GENOME104152	98.6467	821	1069	0.768007
GCF_009875795.1	GUT_GENOME117558	98.6457	869	1069	0.812909
GCF_009875795.1	GUT_GENOME136339	98.6455	795	1069	0.743686
GCF_009875795.1	GUT_GENOME244515	98.6453	837	1069	0.782975
GCF_009875795.1	GUT_GENOME135508	98.6452	850	1069	0.795136
GCF_009875795.1	GUT_GENOME238516	98.6447	788	1069	0.737138
GCF_009875795.1	GUT_GENOME268614	98.6444	773	1069	0.723106
GCF_009875795.1	GUT_GENOME245153	98.6444	837	1069	0.782975
GCF_009875795.1	GUT_GENOME267499	98.6441	856	1069	0.800748
GCF_009875795.1	GUT_GENOME286486	98.6436	823	1069	0.769878
GCF_009875795.1	GUT_GENOME256352	98.6415	866	1069	0.810103
GCF_009875795.1	GUT_GENOME109033	98.6414	814	1069	0.761459
GCF_009875795.1	GUT_GENOME118068	98.6408	775	1069	0.724977
GCF_009875795.1	GUT_GENOME022435	98.6375	763	1069	0.713751
GCF_009875795.1	GUT_GENOME237856	98.6369	839	1069	0.784846
GCF_009875795.1	GUT_GENOME161082	98.6361	819	1069	0.766137
GCF_009875795.1	GUT_GENOME261056	98.6353	850	1069	0.795136
GCF_009875795.1	GUT_GENOME266386	98.6352	857	1069	0.801684
GCF_009875795.1	GUT_GENOME161569	98.6337	791	1069	0.739944
GCF_009875795.1	GUT_GENOME197173	98.6333	850	1069	0.795136
GCF_009875795.1	GUT_GENOME247423	98.633	873	1069	0.816651
GCF_009875795.1	GUT_GENOME265840	98.6323	850	1069	0.795136
GCF_009875795.1	GUT_GENOME284371	98.6322	853	1069	0.797942
GCF_009875795.1	GUT_GENOME264599	98.6321	832	1069	0.778297
GCF_009875795.1	GUT_GENOME280145	98.6315	857	1069	0.801684
GCF_009875795.1	GUT_GENOME090283	98.6311	832	1069	0.778297
GCF_009875795.1	GUT_GENOME201015	98.6309	855	1069	0.799813
GCF_009875795.1	GUT_GENOME067029	98.6308	827	1069	0.77362
GCF_009875795.1	GUT_GENOME208743	98.6293	864	1069	0.808232
GCF_009875795.1	GUT_GENOME283661	98.6288	830	1069	0.776427
GCF_009875795.1	GUT_GENOME252338	98.6284	856	1069	0.800748
GCF_009875795.1	GUT_GENOME073732	98.6277	828	1069	0.774556
GCF_009875795.1	GUT_GENOME025049	98.6276	736	1069	0.688494
GCF_009875795.1	GUT_GENOME135465	98.6271	814	1069	0.761459
GCF_009875795.1	GUT_GENOME164803	98.6264	828	1069	0.774556
GCF_009875795.1	GUT_GENOME285989	98.6261	850	1069	0.795136
GCF_009875795.1	GUT_GENOME091937	98.6261	861	1069	0.805426
GCF_009875795.1	GUT_GENOME256799	98.626	855	1069	0.799813
GCF_009875795.1	GUT_GENOME163278	98.6257	810	1069	0.757717
GCF_009875795.1	GUT_GENOME104093	98.6256	846	1069	0.791394
GCF_009875795.1	GUT_GENOME077627	98.6247	780	1069	0.729654
GCF_009875795.1	GUT_GENOME197333	98.6246	795	1069	0.743686
GCF_009875795.1	GUT_GENOME110192	98.6242	857	1069	0.801684
GCF_009875795.1	GUT_GENOME166489	98.6238	888	1069	0.830683
GCF_009875795.1	GUT_GENOME159896	98.6234	834	1069	0.780168
GCF_009875795.1	GUT_GENOME130864	98.6224	868	1069	0.811974
GCF_009875795.1	GUT_GENOME093220	98.6223	887	1069	0.829747
GCF_009875795.1	GUT_GENOME104020	98.6223	864	1069	0.808232
GCF_009875795.1	GUT_GENOME196665	98.622	824	1069	0.770814
GCF_009875795.1	GUT_GENOME255144	98.6218	833	1069	0.779233
GCF_009875795.1	GUT_GENOME207039	98.6217	807	1069	0.754911
GCF_009875795.1	GUT_GENOME138530	98.6209	851	1069	0.796071
GCF_009875795.1	GUT_GENOME256212	98.6191	868	1069	0.811974
GCF_009875795.1	GUT_GENOME268588	98.6187	845	1069	0.790458
GCF_009875795.1	GUT_GENOME135457	98.6186	848	1069	0.793265
GCF_009875795.1	GUT_GENOME091978	98.6179	869	1069	0.812909
GCF_009875795.1	GUT_GENOME271479	98.6175	840	1069	0.785781
GCF_009875795.1	GUT_GENOME022620	98.6166	857	1069	0.801684
GCF_009875795.1	GUT_GENOME256871	98.6163	725	1069	0.678204
GCF_009875795.1	GUT_GENOME010860	98.6157	856	1069	0.800748
GCF_009875795.1	GUT_GENOME025140	98.6156	852	1069	0.797007
GCF_009875795.1	GUT_GENOME255532	98.6151	844	1069	0.789523
GCF_009875795.1	GUT_GENOME222205	98.6145	784	1069	0.733396
GCF_009875795.1	GUT_GENOME135187	98.614	867	1069	0.811038
GCF_009875795.1	GUT_GENOME284746	98.613	848	1069	0.793265
GCF_009875795.1	GUT_GENOME112913	98.6128	858	1069	0.802619
GCF_009875795.1	GUT_GENOME163101	98.6116	833	1069	0.779233
GCF_009875795.1	GUT_GENOME271038	98.6113	857	1069	0.801684
GCF_009875795.1	GUT_GENOME163927	98.6113	725	1069	0.678204
GCF_009875795.1	GUT_GENOME252441	98.6103	869	1069	0.812909
GCF_009875795.1	GUT_GENOME258340	98.6092	768	1069	0.718428
GCF_009875795.1	GUT_GENOME162214	98.6092	831	1069	0.777362
GCF_009875795.1	GUT_GENOME258310	98.609	827	1069	0.77362
GCF_009875795.1	GUT_GENOME118752	98.6089	842	1069	0.787652
GCF_009875795.1	GUT_GENOME025391	98.6081	859	1069	0.803555
GCF_009875795.1	GUT_GENOME020320	98.6076	827	1069	0.77362
GCF_009875795.1	GUT_GENOME162075	98.6071	762	1069	0.712816
GCF_009875795.1	GUT_GENOME091992	98.6069	862	1069	0.806361
GCF_009875795.1	GUT_GENOME269449	98.6067	867	1069	0.811038
GCF_009875795.1	GUT_GENOME038827	98.606	845	1069	0.790458
GCF_009875795.1	GUT_GENOME000360	98.6056	914	1069	0.855005
GCF_009875795.1	GUT_GENOME272251	98.6051	872	1069	0.815716
GCF_009875795.1	GUT_GENOME092269	98.6045	848	1069	0.793265
GCF_009875795.1	GUT_GENOME286968	98.6039	855	1069	0.799813
GCF_009875795.1	GUT_GENOME268418	98.6032	855	1069	0.799813
GCF_009875795.1	GUT_GENOME109213	98.6027	865	1069	0.809167
GCF_009875795.1	GUT_GENOME134499	98.6025	846	1069	0.791394
GCF_009875795.1	GUT_GENOME279849	98.6016	850	1069	0.795136
GCF_009875795.1	GUT_GENOME106515	98.6004	874	1069	0.817587
GCF_009875795.1	GUT_GENOME267950	98.5987	767	1069	0.717493
GCF_009875795.1	GUT_GENOME066404	98.5986	867	1069	0.811038
GCF_009875795.1	GUT_GENOME197386	98.5976	854	1069	0.798877
GCF_009875795.1	GUT_GENOME236933	98.5973	852	1069	0.797007
GCF_009875795.1	GUT_GENOME270385	98.5968	833	1069	0.779233
GCF_009875795.1	GUT_GENOME083897	98.5967	808	1069	0.755847
GCF_009875795.1	GUT_GENOME022647	98.5966	859	1069	0.803555
GCF_009875795.1	GUT_GENOME237017	98.5964	853	1069	0.797942
GCF_009875795.1	GUT_GENOME065897	98.5959	828	1069	0.774556
GCF_009875795.1	GUT_GENOME272840	98.5945	864	1069	0.808232
GCF_009875795.1	GUT_GENOME110623	98.5944	850	1069	0.795136
GCF_009875795.1	GUT_GENOME094181	98.5941	846	1069	0.791394
GCF_009875795.1	GUT_GENOME098902	98.5933	870	1069	0.813845
GCF_009875795.1	GUT_GENOME267929	98.5908	860	1069	0.80449
GCF_009875795.1	GUT_GENOME043541	98.5903	865	1069	0.809167
GCF_009875795.1	GUT_GENOME271255	98.5896	741	1069	0.693171
GCF_009875795.1	GUT_GENOME115859	98.5892	802	1069	0.750234
GCF_009875795.1	GUT_GENOME085781	98.5889	825	1069	0.771749
GCF_009875795.1	GUT_GENOME245251	98.5875	842	1069	0.787652
GCF_009875795.1	GUT_GENOME037362	98.5873	813	1069	0.760524
GCF_009875795.1	GUT_GENOME213201	98.5871	769	1069	0.719364
GCF_009875795.1	GUT_GENOME005738	98.587	877	1069	0.820393
GCF_009875795.1	GUT_GENOME260025	98.5859	862	1069	0.806361
GCF_009875795.1	GUT_GENOME019439	98.5857	863	1069	0.807297
GCF_009875795.1	GUT_GENOME214253	98.5851	699	1069	0.653882
GCF_009875795.1	GUT_GENOME251025	98.5849	851	1069	0.796071
GCF_009875795.1	GUT_GENOME138624	98.5815	827	1069	0.77362
GCF_009875795.1	GUT_GENOME268857	98.5815	837	1069	0.782975
GCF_009875795.1	GUT_GENOME276168	98.5809	860	1069	0.80449
GCF_009875795.1	GUT_GENOME075867	98.5808	832	1069	0.778297
GCF_009875795.1	GUT_GENOME113876	98.5803	870	1069	0.813845
GCF_009875795.1	GUT_GENOME025471	98.5802	870	1069	0.813845
GCF_009875795.1	GUT_GENOME107883	98.5785	831	1069	0.777362
GCF_009875795.1	GUT_GENOME284646	98.5782	828	1069	0.774556
GCF_009875795.1	GUT_GENOME000125	98.5775	921	1069	0.861553
GCF_009875795.1	GUT_GENOME026072	98.5772	821	1069	0.768007
GCF_009875795.1	GUT_GENOME133197	98.5763	797	1069	0.745557
GCF_009875795.1	GUT_GENOME049441	98.5754	767	1069	0.717493
GCF_009875795.1	GUT_GENOME103790	98.575	891	1069	0.833489
GCF_009875795.1	GUT_GENOME000112	98.575	891	1069	0.833489
GCF_009875795.1	GUT_GENOME197057	98.5742	847	1069	0.792329
GCF_009875795.1	GUT_GENOME111149	98.574	854	1069	0.798877
GCF_009875795.1	GUT_GENOME135883	98.5738	833	1069	0.779233
GCF_009875795.1	GUT_GENOME266883	98.5734	774	1069	0.724041
GCF_009875795.1	GUT_GENOME074912	98.5716	819	1069	0.766137
GCF_009875795.1	GUT_GENOME138951	98.57	825	1069	0.771749
GCF_009875795.1	GUT_GENOME284533	98.5699	828	1069	0.774556
GCF_009875795.1	GUT_GENOME111406	98.5699	848	1069	0.793265
GCF_009875795.1	GUT_GENOME158904	98.5697	854	1069	0.798877
GCF_009875795.1	GUT_GENOME059886	98.5681	823	1069	0.769878
GCF_009875795.1	GUT_GENOME090906	98.5681	757	1069	0.708138
GCF_009875795.1	GUT_GENOME279918	98.567	865	1069	0.809167
GCF_009875795.1	GUT_GENOME279997	98.5668	828	1069	0.774556
GCF_009875795.1	GUT_GENOME078254	98.5661	771	1069	0.721235
GCF_009875795.1	GUT_GENOME094567	98.5655	855	1069	0.799813
GCF_009875795.1	GUT_GENOME114896	98.5649	845	1069	0.790458
GCF_009875795.1	GUT_GENOME049028	98.5644	840	1069	0.785781
GCF_009875795.1	GUT_GENOME106202	98.5637	875	1069	0.818522
GCF_009875795.1	GUT_GENOME135912	98.5637	830	1069	0.776427
GCF_009875795.1	GUT_GENOME024044	98.5592	849	1069	0.7942
GCF_009875795.1	GUT_GENOME116950	98.5583	849	1069	0.7942
GCF_009875795.1	GUT_GENOME269046	98.5573	847	1069	0.792329
GCF_009875795.1	GUT_GENOME008526	98.5569	751	1069	0.702526
GCF_009875795.1	GUT_GENOME197749	98.5566	809	1069	0.756782
GCF_009875795.1	GUT_GENOME138566	98.5564	873	1069	0.816651
GCF_009875795.1	GUT_GENOME059925	98.5539	845	1069	0.790458
GCF_009875795.1	GUT_GENOME114065	98.5532	846	1069	0.791394
GCF_009875795.1	GUT_GENOME271341	98.552	825	1069	0.771749
GCF_009875795.1	GUT_GENOME006102	98.5518	874	1069	0.817587
GCF_009875795.1	GUT_GENOME020487	98.5515	854	1069	0.798877
GCF_009875795.1	GUT_GENOME273856	98.5499	825	1069	0.771749
GCF_009875795.1	GUT_GENOME043248	98.5478	856	1069	0.800748
GCF_009875795.1	GUT_GENOME118784	98.5471	819	1069	0.766137
GCF_009875795.1	GUT_GENOME082433	98.5448	824	1069	0.770814
GCF_009875795.1	GUT_GENOME279267	98.5445	804	1069	0.752105
GCF_009875795.1	GUT_GENOME023100	98.5444	833	1069	0.779233
GCF_009875795.1	GUT_GENOME258757	98.5424	841	1069	0.786717
GCF_009875795.1	GUT_GENOME042476	98.542	832	1069	0.778297
GCF_009875795.1	GUT_GENOME111777	98.5408	863	1069	0.807297
GCF_009875795.1	GUT_GENOME271613	98.5408	854	1069	0.798877
GCF_009875795.1	GUT_GENOME014119	98.5406	860	1069	0.80449
GCF_009875795.1	GUT_GENOME117100	98.5396	859	1069	0.803555
GCF_009875795.1	GUT_GENOME216232	98.5396	648	1069	0.606174
GCF_009875795.1	GUT_GENOME121919	98.5395	866	1069	0.810103
GCF_009875795.1	GUT_GENOME116176	98.5394	849	1069	0.7942
GCF_009875795.1	GUT_GENOME160721	98.5378	833	1069	0.779233
GCF_009875795.1	GUT_GENOME121633	98.5367	862	1069	0.806361
GCF_009875795.1	GUT_GENOME100295	98.5361	839	1069	0.784846
GCF_009875795.1	GUT_GENOME000298	98.5357	891	1069	0.833489
GCF_009875795.1	GUT_GENOME246199	98.5356	875	1069	0.818522
GCF_009875795.1	GUT_GENOME270329	98.5355	851	1069	0.796071
GCF_009875795.1	GUT_GENOME075751	98.5342	832	1069	0.778297
GCF_009875795.1	GUT_GENOME109529	98.5336	783	1069	0.73246
GCF_009875795.1	GUT_GENOME131552	98.5316	882	1069	0.82507
GCF_009875795.1	GUT_GENOME160087	98.5301	833	1069	0.779233
GCF_009875795.1	GUT_GENOME271550	98.53	862	1069	0.806361
GCF_009875795.1	GUT_GENOME246370	98.5287	828	1069	0.774556
GCF_009875795.1	GUT_GENOME104345	98.5282	768	1069	0.718428
GCF_009875795.1	GUT_GENOME268538	98.5276	769	1069	0.719364
GCF_009875795.1	GUT_GENOME110379	98.5275	864	1069	0.808232
GCF_009875795.1	GUT_GENOME026631	98.5266	865	1069	0.809167
GCF_009875795.1	GUT_GENOME050919	98.5221	760	1069	0.710945
GCF_009875795.1	GUT_GENOME020289	98.5194	829	1069	0.775491
GCF_009875795.1	GUT_GENOME167700	98.5193	844	1069	0.789523
GCF_009875795.1	GUT_GENOME153458	98.5178	852	1069	0.797007
GCF_009875795.1	GUT_GENOME087360	98.5177	792	1069	0.740879
GCF_009875795.1	GUT_GENOME020330	98.5175	836	1069	0.782039
GCF_009875795.1	GUT_GENOME265832	98.517	878	1069	0.821328
GCF_009875795.1	GUT_GENOME067552	98.5143	826	1069	0.772685
GCF_009875795.1	GUT_GENOME138175	98.5142	831	1069	0.777362
GCF_009875795.1	GUT_GENOME165811	98.5142	803	1069	0.751169
GCF_009875795.1	GUT_GENOME282128	98.5122	859	1069	0.803555
GCF_009875795.1	GUT_GENOME112719	98.5093	850	1069	0.795136
GCF_009875795.1	GUT_GENOME280050	98.5086	821	1069	0.768007
GCF_009875795.1	GUT_GENOME229489	98.5081	753	1069	0.704397
GCF_009875795.1	GUT_GENOME267702	98.5073	860	1069	0.80449
GCF_009875795.1	GUT_GENOME109088	98.5059	814	1069	0.761459
GCF_009875795.1	GUT_GENOME024398	98.505	829	1069	0.775491
GCF_009875795.1	GUT_GENOME051678	98.5028	843	1069	0.788587
GCF_009875795.1	GUT_GENOME111308	98.5024	868	1069	0.811974
GCF_009875795.1	GUT_GENOME215021	98.5006	740	1069	0.692236
GCF_009875795.1	GUT_GENOME268800	98.4993	741	1069	0.693171
GCF_009875795.1	GUT_GENOME163154	98.4971	828	1069	0.774556
GCF_009875795.1	GUT_GENOME113016	98.4968	861	1069	0.805426
GCF_009875795.1	GUT_GENOME015388	98.4951	830	1069	0.776427
GCF_009875795.1	GUT_GENOME090196	98.4916	827	1069	0.77362
GCF_009875795.1	GUT_GENOME085663	98.4874	795	1069	0.743686
GCF_009875795.1	GUT_GENOME265323	98.486	855	1069	0.799813
GCF_009875795.1	GUT_GENOME138673	98.4848	866	1069	0.810103
GCF_009875795.1	GUT_GENOME271116	98.4831	862	1069	0.806361
GCF_009875795.1	GUT_GENOME161556	98.4816	835	1069	0.781104
GCF_009875795.1	GUT_GENOME114098	98.4776	861	1069	0.805426
GCF_009875795.1	GUT_GENOME082976	98.476	829	1069	0.775491
GCF_009875795.1	GUT_GENOME210107	98.4731	783	1069	0.73246
GCF_009875795.1	GUT_GENOME016255	98.473	844	1069	0.789523
GCF_009875795.1	GUT_GENOME281057	98.4729	702	1069	0.656688
GCF_009875795.1	GUT_GENOME160464	98.4706	796	1069	0.744621
GCF_009875795.1	GUT_GENOME108199	98.4704	764	1069	0.714687
GCF_009875795.1	GUT_GENOME155160	98.4682	819	1069	0.766137
GCF_009875795.1	GUT_GENOME095202	98.4676	769	1069	0.719364
GCF_009875795.1	GUT_GENOME027540	98.465	863	1069	0.807297
GCF_009875795.1	GUT_GENOME280979	98.4642	854	1069	0.798877
GCF_009875795.1	GUT_GENOME092410	98.4631	868	1069	0.811974
GCF_009875795.1	GUT_GENOME278484	98.4622	671	1069	0.627689
GCF_009875795.1	GUT_GENOME082782	98.4621	792	1069	0.740879
GCF_009875795.1	GUT_GENOME199213	98.462	735	1069	0.687558
GCF_009875795.1	GUT_GENOME034430	98.4601	830	1069	0.776427
GCF_009875795.1	GUT_GENOME263492	98.46	871	1069	0.81478
GCF_009875795.1	GUT_GENOME192351	98.459	763	1069	0.713751
GCF_009875795.1	GUT_GENOME273049	98.4543	855	1069	0.799813
GCF_009875795.1	GUT_GENOME233998	98.4534	860	1069	0.80449
GCF_009875795.1	GUT_GENOME259981	98.4501	843	1069	0.788587
GCF_009875795.1	GUT_GENOME124318	98.449	807	1069	0.754911
GCF_009875795.1	GUT_GENOME010279	98.4477	878	1069	0.821328
GCF_009875795.1	GUT_GENOME215736	98.4473	807	1069	0.754911
GCF_009875795.1	GUT_GENOME010375	98.446	874	1069	0.817587
GCF_009875795.1	GUT_GENOME283319	98.4456	735	1069	0.687558
GCF_009875795.1	GUT_GENOME091831	98.4443	888	1069	0.830683
GCF_009875795.1	GUT_GENOME084122	98.4425	796	1069	0.744621
GCF_009875795.1	GUT_GENOME081143	98.4335	803	1069	0.751169
GCF_009875795.1	GUT_GENOME049218	98.4334	817	1069	0.764266
GCF_009875795.1	GUT_GENOME083860	98.4299	835	1069	0.781104
GCF_009875795.1	GUT_GENOME086665	98.4263	686	1069	0.641721
GCF_009875795.1	GUT_GENOME024344	98.4253	819	1069	0.766137
GCF_009875795.1	GUT_GENOME085081	98.4236	850	1069	0.795136
GCF_009875795.1	GUT_GENOME082421	98.4212	758	1069	0.709074
GCF_009875795.1	GUT_GENOME049924	98.4159	814	1069	0.761459
GCF_009875795.1	GUT_GENOME175692	98.413	819	1069	0.766137
GCF_009875795.1	GUT_GENOME085740	98.4078	849	1069	0.7942
GCF_009875795.1	GUT_GENOME000882	98.4062	893	1069	0.83536
GCF_009875795.1	GUT_GENOME263446	98.4061	798	1069	0.746492
GCF_009875795.1	GUT_GENOME083198	98.4055	845	1069	0.790458
GCF_009875795.1	GUT_GENOME012305	98.4013	805	1069	0.75304
GCF_009875795.1	GUT_GENOME265545	98.4002	848	1069	0.793265
GCF_009875795.1	GUT_GENOME180238	98.3988	876	1069	0.819457
GCF_009875795.1	GUT_GENOME277462	98.3964	785	1069	0.734331
GCF_009875795.1	GUT_GENOME082868	98.3955	775	1069	0.724977
GCF_009875795.1	GUT_GENOME264299	98.3922	844	1069	0.789523
GCF_009875795.1	GUT_GENOME215848	98.3915	839	1069	0.784846
GCF_009875795.1	GUT_GENOME085214	98.3826	860	1069	0.80449
GCF_009875795.1	GUT_GENOME083973	98.3747	786	1069	0.735267
GCF_009875795.1	GUT_GENOME046626	98.374	860	1069	0.80449
GCF_009875795.1	GUT_GENOME270959	98.3678	821	1069	0.768007
GCF_009875795.1	GUT_GENOME014895	98.3579	745	1069	0.696913
GCF_009875795.1	GUT_GENOME081436	98.3576	795	1069	0.743686
GCF_009875795.1	GUT_GENOME015824	98.3564	840	1069	0.785781
GCF_009875795.1	GUT_GENOME038038	98.3558	834	1069	0.780168
GCF_009875795.1	GUT_GENOME083014	98.3552	833	1069	0.779233
GCF_009875795.1	GUT_GENOME086164	98.3438	793	1069	0.741815
GCF_009875795.1	GUT_GENOME012713	98.3395	857	1069	0.801684
GCF_009875795.1	GUT_GENOME085976	98.3381	850	1069	0.795136
GCF_009875795.1	GUT_GENOME069799	98.3376	664	1069	0.621141
GCF_009875795.1	GUT_GENOME084195	98.3204	813	1069	0.760524
GCF_009875795.1	GUT_GENOME263820	98.317	858	1069	0.802619
GCF_009875795.1	GUT_GENOME014389	98.3114	847	1069	0.792329
GCF_009875795.1	GUT_GENOME271534	98.3108	720	1069	0.673527
GCF_009875795.1	GUT_GENOME232489	98.305	759	1069	0.710009
GCF_009875795.1	GUT_GENOME085556	98.2919	841	1069	0.786717
GCF_009875795.1	GUT_GENOME044621	98.2904	849	1069	0.7942
GCF_009875795.1	GUT_GENOME082082	98.2843	841	1069	0.786717
GCF_009875795.1	GUT_GENOME080904	98.2802	852	1069	0.797007
GCF_009875795.1	GUT_GENOME148080	98.2741	843	1069	0.788587
GCF_009875795.1	GUT_GENOME083535	98.2674	797	1069	0.745557
GCF_009875795.1	GUT_GENOME229271	98.2435	819	1069	0.766137
GCF_009875795.1	GUT_GENOME033907	98.2278	872	1069	0.815716
GCF_009875795.1	GUT_GENOME083316	98.2129	849	1069	0.7942
GCF_009875795.1	GUT_GENOME237808	98.2021	839	1069	0.784846
GCF_009875795.1	GUT_GENOME228870	98.193	758	1069	0.709074
GCF_009875795.1	GUT_GENOME231053	98.1851	853	1069	0.797942
GCF_009875795.1	GUT_GENOME044718	98.1765	821	1069	0.768007
GCF_009875795.1	GUT_GENOME262965	98.1748	848	1069	0.793265
GCF_009875795.1	GUT_GENOME153335	98.1268	868	1069	0.811974
GCF_009875795.1	GUT_GENOME083729	98.0859	778	1069	0.727783
GCF_009875795.1	GUT_GENOME250382	98.0727	817	1069	0.764266
GCF_009875795.1	GUT_GENOME000892	98.0453	881	1069	0.824135
GCF_009875795.1	GUT_GENOME140310	98.0402	862	1069	0.806361
GCF_009875795.1	GUT_GENOME228470	98.0397	809	1069	0.756782
GCF_009875795.1	GUT_GENOME155189	98.0317	832	1069	0.778297
GCF_009875795.1	GUT_GENOME264470	98.0217	853	1069	0.797942
GCF_009875795.1	GUT_GENOME148668	97.9685	847	1069	0.792329
GCF_009875795.1	GUT_GENOME140306	97.9257	855	1069	0.799813
GCF_009875795.1	GUT_GENOME248991	97.9076	758	1069	0.709074
GCF_009875795.1	GUT_GENOME104513	97.8968	760	1069	0.710945
GCF_009875795.1	GUT_GENOME263662	97.893	796	1069	0.744621
GCF_009875795.1	GUT_GENOME066334	97.888	761	1069	0.71188
GCF_009875795.1	GUT_GENOME013742	97.8712	847	1069	0.792329
GCF_009875795.1	GUT_GENOME248340	97.8428	800	1069	0.748363
GCF_009875795.1	GUT_GENOME031873	97.8365	710	1069	0.664172
GCF_009875795.1	GUT_GENOME236383	97.8362	765	1069	0.715622
GCF_009875795.1	GUT_GENOME086034	97.8274	777	1069	0.726848
GCF_009875795.1	GUT_GENOME081081	97.8247	827	1069	0.77362
GCF_009875795.1	GUT_GENOME283144	97.8186	758	1069	0.709074
GCF_009875795.1	GUT_GENOME228489	97.8068	823	1069	0.769878
GCF_009875795.1	GUT_GENOME000977	97.8015	851	1069	0.796071
GCF_009875795.1	GUT_GENOME153936	97.7908	806	1069	0.753976
GCF_009875795.1	GUT_GENOME017328	97.7894	799	1069	0.747428
GCF_009875795.1	GUT_GENOME086192	97.7797	759	1069	0.710009
GCF_009875795.1	GUT_GENOME148695	97.7731	844	1069	0.789523
GCF_009875795.1	GUT_GENOME013190	97.7683	796	1069	0.744621
GCF_009875795.1	GUT_GENOME086607	97.7651	837	1069	0.782975
GCF_009875795.1	GUT_GENOME187658	97.7626	810	1069	0.757717
GCF_009875795.1	GUT_GENOME085591	97.7589	838	1069	0.78391
GCF_009875795.1	GUT_GENOME100029	97.7559	829	1069	0.775491
GCF_009875795.1	GUT_GENOME214802	97.7541	761	1069	0.71188
GCF_009875795.1	GUT_GENOME233350	97.7502	841	1069	0.786717
GCF_009875795.1	GUT_GENOME159580	97.7358	699	1069	0.653882
GCF_009875795.1	GUT_GENOME001379	97.7246	857	1069	0.801684
GCF_009875795.1	GUT_GENOME021715	97.7154	796	1069	0.744621
GCF_009875795.1	GUT_GENOME228455	97.7145	826	1069	0.772685
GCF_009875795.1	GUT_GENOME273099	97.7125	807	1069	0.754911
GCF_009875795.1	GUT_GENOME016347	97.7048	831	1069	0.777362
GCF_009875795.1	GUT_GENOME113139	97.703	823	1069	0.769878
GCF_009875795.1	GUT_GENOME049710	97.6975	815	1069	0.762395
GCF_009875795.1	GUT_GENOME081610	97.696	817	1069	0.764266
GCF_009875795.1	GUT_GENOME212478	97.687	722	1069	0.675398
GCF_009875795.1	GUT_GENOME011628	97.6821	825	1069	0.771749
GCF_009875795.1	GUT_GENOME153699	97.6805	848	1069	0.793265
GCF_009875795.1	GUT_GENOME263227	97.675	829	1069	0.775491
GCF_009875795.1	GUT_GENOME265662	97.6723	843	1069	0.788587
GCF_009875795.1	GUT_GENOME081040	97.6718	835	1069	0.781104
GCF_009875795.1	GUT_GENOME262865	97.6647	835	1069	0.781104
GCF_009875795.1	GUT_GENOME286555	97.6638	832	1069	0.778297
GCF_009875795.1	GUT_GENOME239734	97.661	868	1069	0.811974
GCF_009875795.1	GUT_GENOME229848	97.6582	794	1069	0.74275
GCF_009875795.1	GUT_GENOME154908	97.6499	817	1069	0.764266
GCF_009875795.1	GUT_GENOME086547	97.6344	835	1069	0.781104
GCF_009875795.1	GUT_GENOME149765	97.6328	828	1069	0.774556
GCF_009875795.1	GUT_GENOME049747	97.6229	812	1069	0.759588
GCF_009875795.1	GUT_GENOME153487	97.6223	833	1069	0.779233
GCF_009875795.1	GUT_GENOME001247	97.587	884	1069	0.826941
GCF_009875795.1	GUT_GENOME019352	97.5785	817	1069	0.764266
GCF_009875795.1	GUT_GENOME017948	97.4918	790	1069	0.739008
GCF_009875795.1	GUT_GENOME010147	97.4874	831	1069	0.777362
GCF_009875795.1	GUT_GENOME170568	95.9109	821	1069	0.768007
GCF_009875795.1	GUT_GENOME139664	95.6693	837	1069	0.782975
GCF_009875795.1	GUT_GENOME022026	89.1817	694	1069	0.649205
GCF_009875795.1	GUT_GENOME253410	89.1263	672	1069	0.628625
GCF_009875795.1	GUT_GENOME095969	89.1133	721	1069	0.674462
GCF_009875795.1	GUT_GENOME092872	89.0763	678	1069	0.634238
GCF_009875795.1	GUT_GENOME000055	89.048	747	1069	0.698784
GCF_009875795.1	GUT_GENOME119387	89.0163	677	1069	0.633302
GCF_009875795.1	GUT_GENOME009318	88.9558	692	1069	0.647334
GCF_009875795.1	GUT_GENOME175751	88.9452	681	1069	0.637044
GCF_009875795.1	GUT_GENOME056828	88.9172	656	1069	0.613658
GCF_009875795.1	GUT_GENOME159144	88.9072	698	1069	0.652947
GCF_009875795.1	GUT_GENOME135556	88.9034	658	1069	0.615529
GCF_009875795.1	GUT_GENOME210094	88.8947	683	1069	0.638915
GCF_009875795.1	GUT_GENOME006175	88.8942	665	1069	0.622077
GCF_009875795.1	GUT_GENOME265934	88.8777	682	1069	0.637979
GCF_009875795.1	GUT_GENOME270947	88.8757	645	1069	0.603368
GCF_009875795.1	GUT_GENOME252881	88.8716	668	1069	0.624883
GCF_009875795.1	GUT_GENOME041719	88.8674	675	1069	0.631431
GCF_009875795.1	GUT_GENOME267876	88.8589	674	1069	0.630496
GCF_009875795.1	GUT_GENOME025698	88.8551	684	1069	0.63985
GCF_009875795.1	GUT_GENOME066639	88.8523	671	1069	0.627689
GCF_009875795.1	GUT_GENOME106854	88.8363	651	1069	0.60898
GCF_009875795.1	GUT_GENOME278076	88.819	669	1069	0.625819
GCF_009875795.1	GUT_GENOME137738	88.8163	664	1069	0.621141
GCF_009875795.1	GUT_GENOME279781	88.8118	669	1069	0.625819
GCF_009875795.1	GUT_GENOME269593	88.8076	719	1069	0.672591
GCF_009875795.1	GUT_GENOME275548	88.8057	668	1069	0.624883
GCF_009875795.1	GUT_GENOME254772	88.8009	695	1069	0.65014
GCF_009875795.1	GUT_GENOME283436	88.8003	693	1069	0.648269
GCF_009875795.1	GUT_GENOME244955	88.7964	663	1069	0.620206
GCF_009875795.1	GUT_GENOME257979	88.7946	687	1069	0.642657
GCF_009875795.1	GUT_GENOME269150	88.7845	688	1069	0.643592
GCF_009875795.1	GUT_GENOME021291	88.7835	606	1069	0.566885
GCF_009875795.1	GUT_GENOME024892	88.7787	675	1069	0.631431
GCF_009875795.1	GUT_GENOME009920	88.7764	680	1069	0.636109
GCF_009875795.1	GUT_GENOME266759	88.7736	687	1069	0.642657
GCF_009875795.1	GUT_GENOME025854	88.771	687	1069	0.642657
GCF_009875795.1	GUT_GENOME255671	88.7709	638	1069	0.596819
GCF_009875795.1	GUT_GENOME104604	88.7682	680	1069	0.636109
GCF_009875795.1	GUT_GENOME117131	88.7654	620	1069	0.579981
GCF_009875795.1	GUT_GENOME025769	88.7645	669	1069	0.625819
GCF_009875795.1	GUT_GENOME003942	88.7639	665	1069	0.622077
GCF_009875795.1	GUT_GENOME008609	88.7629	674	1069	0.630496
GCF_009875795.1	GUT_GENOME094324	88.747	651	1069	0.60898
GCF_009875795.1	GUT_GENOME134528	88.7387	680	1069	0.636109
GCF_009875795.1	GUT_GENOME024771	88.736	690	1069	0.645463
GCF_009875795.1	GUT_GENOME093368	88.7353	688	1069	0.643592
GCF_009875795.1	GUT_GENOME275283	88.7285	683	1069	0.638915
GCF_009875795.1	GUT_GENOME112770	88.7202	680	1069	0.636109
GCF_009875795.1	GUT_GENOME105221	88.7096	666	1069	0.623012
GCF_009875795.1	GUT_GENOME109191	88.7072	674	1069	0.630496
GCF_009875795.1	GUT_GENOME111187	88.7072	692	1069	0.647334
GCF_009875795.1	GUT_GENOME286234	88.7013	709	1069	0.663237
GCF_009875795.1	GUT_GENOME266782	88.6943	693	1069	0.648269
GCF_009875795.1	GUT_GENOME056280	88.6942	654	1069	0.611787
GCF_009875795.1	GUT_GENOME265163	88.6902	639	1069	0.597755
GCF_009875795.1	GUT_GENOME273004	88.6864	695	1069	0.65014
GCF_009875795.1	GUT_GENOME059127	88.6768	683	1069	0.638915
GCF_009875795.1	GUT_GENOME105737	88.6745	680	1069	0.636109
GCF_009875795.1	GUT_GENOME264116	88.6702	680	1069	0.636109
GCF_009875795.1	GUT_GENOME113100	88.6678	678	1069	0.634238
GCF_009875795.1	GUT_GENOME203498	88.6642	693	1069	0.648269
GCF_009875795.1	GUT_GENOME272201	88.6628	696	1069	0.651076
GCF_009875795.1	GUT_GENOME283542	88.6598	702	1069	0.656688
GCF_009875795.1	GUT_GENOME015346	88.6581	679	1069	0.635173
GCF_009875795.1	GUT_GENOME271232	88.6511	698	1069	0.652947
GCF_009875795.1	GUT_GENOME245736	88.6482	673	1069	0.62956
GCF_009875795.1	GUT_GENOME105714	88.6465	647	1069	0.605239
GCF_009875795.1	GUT_GENOME115307	88.6436	671	1069	0.627689
GCF_009875795.1	GUT_GENOME207188	88.6418	662	1069	0.61927
GCF_009875795.1	GUT_GENOME261257	88.6391	665	1069	0.622077
GCF_009875795.1	GUT_GENOME110666	88.6377	669	1069	0.625819
GCF_009875795.1	GUT_GENOME269037	88.6368	693	1069	0.648269
GCF_009875795.1	GUT_GENOME159191	88.6303	687	1069	0.642657
GCF_009875795.1	GUT_GENOME112377	88.6258	658	1069	0.615529
GCF_009875795.1	GUT_GENOME081006	88.6253	685	1069	0.640786
GCF_009875795.1	GUT_GENOME082676	88.6214	684	1069	0.63985
GCF_009875795.1	GUT_GENOME044202	88.6202	686	1069	0.641721
GCF_009875795.1	GUT_GENOME255248	88.6192	685	1069	0.640786
GCF_009875795.1	GUT_GENOME085267	88.6069	683	1069	0.638915
GCF_009875795.1	GUT_GENOME252536	88.6056	687	1069	0.642657
GCF_009875795.1	GUT_GENOME068744	88.5907	662	1069	0.61927
GCF_009875795.1	GUT_GENOME106404	88.5897	690	1069	0.645463
GCF_009875795.1	GUT_GENOME112732	88.5845	672	1069	0.628625
GCF_009875795.1	GUT_GENOME153560	88.5709	598	1069	0.559401
GCF_009875795.1	GUT_GENOME272961	88.57	690	1069	0.645463
GCF_009875795.1	GUT_GENOME158993	88.5657	669	1069	0.625819
GCF_009875795.1	GUT_GENOME157841	88.564	633	1069	0.592142
GCF_009875795.1	GUT_GENOME247115	88.5593	698	1069	0.652947
GCF_009875795.1	GUT_GENOME101171	88.5569	673	1069	0.62956
GCF_009875795.1	GUT_GENOME018775	88.539	642	1069	0.600561
GCF_009875795.1	GUT_GENOME086511	88.5373	674	1069	0.630496
GCF_009875795.1	GUT_GENOME023277	88.5201	666	1069	0.623012
GCF_009875795.1	GUT_GENOME129708	88.5115	605	1069	0.565949
GCF_009875795.1	GUT_GENOME068838	88.5082	624	1069	0.583723
GCF_009875795.1	GUT_GENOME086359	88.5035	658	1069	0.615529
GCF_009875795.1	GUT_GENOME242936	88.5029	578	1069	0.540692
GCF_009875795.1	GUT_GENOME047991	88.495	708	1069	0.662301
GCF_009875795.1	GUT_GENOME154455	88.4925	689	1069	0.644528
GCF_009875795.1	GUT_GENOME264573	88.4413	626	1069	0.585594
GCF_009875795.1	GUT_GENOME089503	88.4226	656	1069	0.613658
GCF_009875795.1	GUT_GENOME007858	88.3249	643	1069	0.601497
GCF_009875795.1	GUT_GENOME012554	88.3032	606	1069	0.566885
GCF_009875795.1	GUT_GENOME229366	88.2779	638	1069	0.596819
GCF_009875795.1	GUT_GENOME268191	87.9668	665	1069	0.622077
GCF_009875795.1	GUT_GENOME272179	87.8636	637	1069	0.595884
GCF_009875795.1	GUT_GENOME116467	87.8485	646	1069	0.604303
GCF_009875795.1	GUT_GENOME113282	87.8243	652	1069	0.609916
GCF_009875795.1	GUT_GENOME011375	87.775	625	1069	0.584659
GCF_009875795.1	GUT_GENOME027156	87.774	648	1069	0.606174
GCF_009875795.1	GUT_GENOME105828	87.7674	655	1069	0.612722
GCF_009875795.1	GUT_GENOME270469	87.7566	657	1069	0.614593
GCF_009875795.1	GUT_GENOME070912	87.7059	622	1069	0.581852
GCF_009875795.1	GUT_GENOME264383	87.7031	655	1069	0.612722
GCF_009875795.1	GUT_GENOME270483	87.7002	655	1069	0.612722
GCF_009875795.1	GUT_GENOME027212	87.6766	650	1069	0.608045
GCF_009875795.1	GUT_GENOME113462	87.6452	640	1069	0.59869
GCF_009875795.1	GUT_GENOME271271	87.6356	645	1069	0.603368
GCF_009875795.1	GUT_GENOME027245	87.6275	669	1069	0.625819
GCF_009875795.1	GUT_GENOME024713	87.6174	645	1069	0.603368
GCF_009875795.1	GUT_GENOME013574	87.5234	628	1069	0.587465
GCF_009875795.1	GUT_GENOME237738	87.4901	623	1069	0.582788
GCF_009875825.1	GUT_GENOME238486	98.9916	822	1063	0.773283
GCF_009875825.1	GUT_GENOME251225	98.9736	828	1063	0.778928
GCF_009875825.1	GUT_GENOME189635	98.9265	854	1063	0.803387
GCF_009875825.1	GUT_GENOME190482	98.9143	843	1063	0.793039
GCF_009875825.1	GUT_GENOME194570	98.8476	838	1063	0.788335
GCF_009875825.1	GUT_GENOME091443	98.847	803	1063	0.755409
GCF_009875825.1	GUT_GENOME210750	98.8288	834	1063	0.784572
GCF_009875825.1	GUT_GENOME194465	98.8225	834	1063	0.784572
GCF_009875825.1	GUT_GENOME130723	98.8224	844	1063	0.793979
GCF_009875825.1	GUT_GENOME189150	98.8173	780	1063	0.733772
GCF_009875825.1	GUT_GENOME005303	98.8092	795	1063	0.747883
GCF_009875825.1	GUT_GENOME244906	98.8083	850	1063	0.799624
GCF_009875825.1	GUT_GENOME208418	98.8044	771	1063	0.725306
GCF_009875825.1	GUT_GENOME213075	98.8013	747	1063	0.702728
GCF_009875825.1	GUT_GENOME209678	98.7992	755	1063	0.710254
GCF_009875825.1	GUT_GENOME258887	98.7969	847	1063	0.796802
GCF_009875825.1	GUT_GENOME077038	98.7951	814	1063	0.765757
GCF_009875825.1	GUT_GENOME067732	98.7948	808	1063	0.760113
GCF_009875825.1	GUT_GENOME247281	98.7902	856	1063	0.805268
GCF_009875825.1	GUT_GENOME003630	98.7813	845	1063	0.79492
GCF_009875825.1	GUT_GENOME114656	98.7798	844	1063	0.793979
GCF_009875825.1	GUT_GENOME209754	98.779	781	1063	0.734713
GCF_009875825.1	GUT_GENOME286283	98.7692	852	1063	0.801505
GCF_009875825.1	GUT_GENOME219441	98.7687	794	1063	0.746943
GCF_009875825.1	GUT_GENOME210738	98.7673	855	1063	0.804327
GCF_009875825.1	GUT_GENOME208924	98.766	859	1063	0.80809
GCF_009875825.1	GUT_GENOME130700	98.7639	777	1063	0.73095
GCF_009875825.1	GUT_GENOME020549	98.7639	839	1063	0.789276
GCF_009875825.1	GUT_GENOME133686	98.7614	864	1063	0.812794
GCF_009875825.1	GUT_GENOME259926	98.7603	865	1063	0.813735
GCF_009875825.1	GUT_GENOME110913	98.7576	854	1063	0.803387
GCF_009875825.1	GUT_GENOME192962	98.7556	846	1063	0.795861
GCF_009875825.1	GUT_GENOME253046	98.7549	870	1063	0.818438
GCF_009875825.1	GUT_GENOME175537	98.754	825	1063	0.776105
GCF_009875825.1	GUT_GENOME208727	98.7539	877	1063	0.825024
GCF_009875825.1	GUT_GENOME255569	98.7519	863	1063	0.811853
GCF_009875825.1	GUT_GENOME210765	98.7505	834	1063	0.784572
GCF_009875825.1	GUT_GENOME100934	98.749	842	1063	0.792098
GCF_009875825.1	GUT_GENOME246149	98.7479	867	1063	0.815616
GCF_009875825.1	GUT_GENOME113792	98.7478	844	1063	0.793979
GCF_009875825.1	GUT_GENOME112461	98.7476	843	1063	0.793039
GCF_009875825.1	GUT_GENOME243492	98.7457	845	1063	0.79492
GCF_009875825.1	GUT_GENOME265440	98.7411	809	1063	0.761054
GCF_009875825.1	GUT_GENOME271655	98.7397	855	1063	0.804327
GCF_009875825.1	GUT_GENOME111000	98.7395	819	1063	0.770461
GCF_009875825.1	GUT_GENOME258547	98.7388	829	1063	0.779868
GCF_009875825.1	GUT_GENOME188557	98.7377	830	1063	0.780809
GCF_009875825.1	GUT_GENOME282292	98.7366	843	1063	0.793039
GCF_009875825.1	GUT_GENOME216624	98.7365	763	1063	0.71778
GCF_009875825.1	GUT_GENOME243213	98.7361	813	1063	0.764817
GCF_009875825.1	GUT_GENOME109883	98.7317	841	1063	0.791157
GCF_009875825.1	GUT_GENOME221986	98.7307	792	1063	0.745061
GCF_009875825.1	GUT_GENOME112532	98.7303	864	1063	0.812794
GCF_009875825.1	GUT_GENOME217894	98.7301	865	1063	0.813735
GCF_009875825.1	GUT_GENOME270163	98.7243	867	1063	0.815616
GCF_009875825.1	GUT_GENOME100777	98.7238	792	1063	0.745061
GCF_009875825.1	GUT_GENOME192368	98.7237	820	1063	0.771402
GCF_009875825.1	GUT_GENOME109213	98.7229	858	1063	0.80715
GCF_009875825.1	GUT_GENOME278681	98.7218	719	1063	0.676388
GCF_009875825.1	GUT_GENOME196567	98.7209	862	1063	0.810913
GCF_009875825.1	GUT_GENOME247423	98.7165	875	1063	0.823142
GCF_009875825.1	GUT_GENOME126276	98.7164	856	1063	0.805268
GCF_009875825.1	GUT_GENOME138019	98.7163	836	1063	0.786453
GCF_009875825.1	GUT_GENOME197978	98.7157	807	1063	0.759172
GCF_009875825.1	GUT_GENOME259790	98.7154	819	1063	0.770461
GCF_009875825.1	GUT_GENOME076164	98.7149	824	1063	0.775165
GCF_009875825.1	GUT_GENOME112343	98.7141	828	1063	0.778928
GCF_009875825.1	GUT_GENOME255937	98.7132	847	1063	0.796802
GCF_009875825.1	GUT_GENOME112073	98.7124	828	1063	0.778928
GCF_009875825.1	GUT_GENOME247510	98.7118	857	1063	0.806209
GCF_009875825.1	GUT_GENOME103915	98.7076	818	1063	0.76952
GCF_009875825.1	GUT_GENOME111840	98.7076	822	1063	0.773283
GCF_009875825.1	GUT_GENOME021431	98.7043	847	1063	0.796802
GCF_009875825.1	GUT_GENOME091211	98.7033	800	1063	0.752587
GCF_009875825.1	GUT_GENOME109664	98.7002	867	1063	0.815616
GCF_009875825.1	GUT_GENOME068387	98.6993	769	1063	0.723424
GCF_009875825.1	GUT_GENOME268386	98.6977	849	1063	0.798683
GCF_009875825.1	GUT_GENOME208743	98.6957	865	1063	0.813735
GCF_009875825.1	GUT_GENOME186763	98.6947	828	1063	0.778928
GCF_009875825.1	GUT_GENOME115704	98.6947	851	1063	0.800564
GCF_009875825.1	GUT_GENOME283233	98.6946	806	1063	0.758231
GCF_009875825.1	GUT_GENOME117028	98.6928	793	1063	0.746002
GCF_009875825.1	GUT_GENOME253516	98.6915	846	1063	0.795861
GCF_009875825.1	GUT_GENOME117994	98.6882	834	1063	0.784572
GCF_009875825.1	GUT_GENOME251025	98.6882	844	1063	0.793979
GCF_009875825.1	GUT_GENOME258271	98.688	814	1063	0.765757
GCF_009875825.1	GUT_GENOME004204	98.6877	825	1063	0.776105
GCF_009875825.1	GUT_GENOME272934	98.6872	826	1063	0.777046
GCF_009875825.1	GUT_GENOME257150	98.6871	861	1063	0.809972
GCF_009875825.1	GUT_GENOME258475	98.6862	857	1063	0.806209
GCF_009875825.1	GUT_GENOME106106	98.6861	859	1063	0.80809
GCF_009875825.1	GUT_GENOME027038	98.6838	817	1063	0.768579
GCF_009875825.1	GUT_GENOME133865	98.6827	854	1063	0.803387
GCF_009875825.1	GUT_GENOME201015	98.6825	855	1063	0.804327
GCF_009875825.1	GUT_GENOME286680	98.6817	835	1063	0.785513
GCF_009875825.1	GUT_GENOME222205	98.6811	787	1063	0.740357
GCF_009875825.1	GUT_GENOME251124	98.6809	848	1063	0.797742
GCF_009875825.1	GUT_GENOME109033	98.6804	807	1063	0.759172
GCF_009875825.1	GUT_GENOME282415	98.6789	868	1063	0.816557
GCF_009875825.1	GUT_GENOME272875	98.6768	856	1063	0.805268
GCF_009875825.1	GUT_GENOME271319	98.6765	762	1063	0.716839
GCF_009875825.1	GUT_GENOME059061	98.6764	818	1063	0.76952
GCF_009875825.1	GUT_GENOME268571	98.675	837	1063	0.787394
GCF_009875825.1	GUT_GENOME252441	98.6748	866	1063	0.814675
GCF_009875825.1	GUT_GENOME271255	98.6741	749	1063	0.70461
GCF_009875825.1	GUT_GENOME273164	98.673	859	1063	0.80809
GCF_009875825.1	GUT_GENOME022465	98.6729	841	1063	0.791157
GCF_009875825.1	GUT_GENOME009179	98.6725	852	1063	0.801505
GCF_009875825.1	GUT_GENOME074158	98.6719	854	1063	0.803387
GCF_009875825.1	GUT_GENOME269489	98.6695	854	1063	0.803387
GCF_009875825.1	GUT_GENOME271979	98.669	836	1063	0.786453
GCF_009875825.1	GUT_GENOME071199	98.6684	748	1063	0.703669
GCF_009875825.1	GUT_GENOME073973	98.6669	837	1063	0.787394
GCF_009875825.1	GUT_GENOME265840	98.6667	849	1063	0.798683
GCF_009875825.1	GUT_GENOME066754	98.6656	854	1063	0.803387
GCF_009875825.1	GUT_GENOME110179	98.6651	813	1063	0.764817
GCF_009875825.1	GUT_GENOME255532	98.665	844	1063	0.793979
GCF_009875825.1	GUT_GENOME178928	98.6648	846	1063	0.795861
GCF_009875825.1	GUT_GENOME104152	98.6639	820	1063	0.771402
GCF_009875825.1	GUT_GENOME285989	98.6608	848	1063	0.797742
GCF_009875825.1	GUT_GENOME208389	98.6603	815	1063	0.766698
GCF_009875825.1	GUT_GENOME197333	98.6597	797	1063	0.749765
GCF_009875825.1	GUT_GENOME161082	98.6593	816	1063	0.767639
GCF_009875825.1	GUT_GENOME286486	98.6588	829	1063	0.779868
GCF_009875825.1	GUT_GENOME268646	98.6587	825	1063	0.776105
GCF_009875825.1	GUT_GENOME134156	98.6573	804	1063	0.75635
GCF_009875825.1	GUT_GENOME025049	98.6542	737	1063	0.693321
GCF_009875825.1	GUT_GENOME252338	98.6541	845	1063	0.79492
GCF_009875825.1	GUT_GENOME160087	98.654	831	1063	0.78175
GCF_009875825.1	GUT_GENOME244515	98.6536	842	1063	0.792098
GCF_009875825.1	GUT_GENOME261056	98.6516	859	1063	0.80809
GCF_009875825.1	GUT_GENOME038827	98.651	840	1063	0.790216
GCF_009875825.1	GUT_GENOME106515	98.6505	863	1063	0.811853
GCF_009875825.1	GUT_GENOME008774	98.6502	874	1063	0.822201
GCF_009875825.1	GUT_GENOME280173	98.6495	827	1063	0.777987
GCF_009875825.1	GUT_GENOME270385	98.6492	830	1063	0.780809
GCF_009875825.1	GUT_GENOME136339	98.649	798	1063	0.750706
GCF_009875825.1	GUT_GENOME272251	98.6485	868	1063	0.816557
GCF_009875825.1	GUT_GENOME253824	98.6478	854	1063	0.803387
GCF_009875825.1	GUT_GENOME256799	98.6473	858	1063	0.80715
GCF_009875825.1	GUT_GENOME093220	98.6466	890	1063	0.837253
GCF_009875825.1	GUT_GENOME245153	98.6464	843	1063	0.793039
GCF_009875825.1	GUT_GENOME000360	98.6461	911	1063	0.857008
GCF_009875825.1	GUT_GENOME196832	98.6454	846	1063	0.795861
GCF_009875825.1	GUT_GENOME136219	98.6454	842	1063	0.792098
GCF_009875825.1	GUT_GENOME121785	98.6445	865	1063	0.813735
GCF_009875825.1	GUT_GENOME273077	98.6441	859	1063	0.80809
GCF_009875825.1	GUT_GENOME158959	98.6439	866	1063	0.814675
GCF_009875825.1	GUT_GENOME163278	98.6436	805	1063	0.757291
GCF_009875825.1	GUT_GENOME112936	98.6432	843	1063	0.793039
GCF_009875825.1	GUT_GENOME067208	98.6418	812	1063	0.763876
GCF_009875825.1	GUT_GENOME138175	98.6417	825	1063	0.776105
GCF_009875825.1	GUT_GENOME102333	98.6414	804	1063	0.75635
GCF_009875825.1	GUT_GENOME107444	98.6412	749	1063	0.70461
GCF_009875825.1	GUT_GENOME068707	98.6408	808	1063	0.760113
GCF_009875825.1	GUT_GENOME133088	98.6397	816	1063	0.767639
GCF_009875825.1	GUT_GENOME139205	98.6396	857	1063	0.806209
GCF_009875825.1	GUT_GENOME193767	98.6386	842	1063	0.792098
GCF_009875825.1	GUT_GENOME256871	98.6378	722	1063	0.67921
GCF_009875825.1	GUT_GENOME136190	98.6373	838	1063	0.788335
GCF_009875825.1	GUT_GENOME166489	98.6369	889	1063	0.836312
GCF_009875825.1	GUT_GENOME186497	98.6363	744	1063	0.699906
GCF_009875825.1	GUT_GENOME065897	98.6352	828	1063	0.778928
GCF_009875825.1	GUT_GENOME023806	98.6345	809	1063	0.761054
GCF_009875825.1	GUT_GENOME164803	98.6341	830	1063	0.780809
GCF_009875825.1	GUT_GENOME196432	98.6338	812	1063	0.763876
GCF_009875825.1	GUT_GENOME020202	98.6338	780	1063	0.733772
GCF_009875825.1	GUT_GENOME025391	98.6333	857	1063	0.806209
GCF_009875825.1	GUT_GENOME162214	98.6332	836	1063	0.786453
GCF_009875825.1	GUT_GENOME072453	98.6328	821	1063	0.772342
GCF_009875825.1	GUT_GENOME022620	98.6324	853	1063	0.802446
GCF_009875825.1	GUT_GENOME109285	98.632	769	1063	0.723424
GCF_009875825.1	GUT_GENOME037362	98.632	813	1063	0.764817
GCF_009875825.1	GUT_GENOME265059	98.6314	852	1063	0.801505
GCF_009875825.1	GUT_GENOME002014	98.6313	826	1063	0.777046
GCF_009875825.1	GUT_GENOME005738	98.6296	876	1063	0.824083
GCF_009875825.1	GUT_GENOME235318	98.6285	841	1063	0.791157
GCF_009875825.1	GUT_GENOME020320	98.6284	823	1063	0.774224
GCF_009875825.1	GUT_GENOME196665	98.6279	821	1063	0.772342
GCF_009875825.1	GUT_GENOME267499	98.6268	863	1063	0.811853
GCF_009875825.1	GUT_GENOME056725	98.6264	783	1063	0.736595
GCF_009875825.1	GUT_GENOME093550	98.6252	866	1063	0.814675
GCF_009875825.1	GUT_GENOME126439	98.6251	875	1063	0.823142
GCF_009875825.1	GUT_GENOME251430	98.6241	849	1063	0.798683
GCF_009875825.1	GUT_GENOME067364	98.624	846	1063	0.795861
GCF_009875825.1	GUT_GENOME133938	98.624	858	1063	0.80715
GCF_009875825.1	GUT_GENOME022435	98.6233	760	1063	0.714958
GCF_009875825.1	GUT_GENOME260025	98.623	862	1063	0.810913
GCF_009875825.1	GUT_GENOME164006	98.6214	806	1063	0.758231
GCF_009875825.1	GUT_GENOME026110	98.6213	805	1063	0.757291
GCF_009875825.1	GUT_GENOME159896	98.6212	829	1063	0.779868
GCF_009875825.1	GUT_GENOME280145	98.6211	855	1063	0.804327
GCF_009875825.1	GUT_GENOME118068	98.62	776	1063	0.730009
GCF_009875825.1	GUT_GENOME118752	98.6197	847	1063	0.796802
GCF_009875825.1	GUT_GENOME268857	98.6197	841	1063	0.791157
GCF_009875825.1	GUT_GENOME284746	98.6195	843	1063	0.793039
GCF_009875825.1	GUT_GENOME282697	98.6191	798	1063	0.750706
GCF_009875825.1	GUT_GENOME160721	98.6189	832	1063	0.78269
GCF_009875825.1	GUT_GENOME238029	98.6188	842	1063	0.792098
GCF_009875825.1	GUT_GENOME197386	98.6187	854	1063	0.803387
GCF_009875825.1	GUT_GENOME090906	98.6183	756	1063	0.711195
GCF_009875825.1	GUT_GENOME010082	98.618	849	1063	0.798683
GCF_009875825.1	GUT_GENOME111308	98.6179	862	1063	0.810913
GCF_009875825.1	GUT_GENOME271038	98.6179	850	1063	0.799624
GCF_009875825.1	GUT_GENOME271800	98.6177	869	1063	0.817498
GCF_009875825.1	GUT_GENOME216232	98.6172	644	1063	0.605833
GCF_009875825.1	GUT_GENOME074912	98.6171	815	1063	0.766698
GCF_009875825.1	GUT_GENOME000172	98.6165	904	1063	0.850423
GCF_009875825.1	GUT_GENOME075207	98.6161	793	1063	0.746002
GCF_009875825.1	GUT_GENOME256212	98.6158	868	1063	0.816557
GCF_009875825.1	GUT_GENOME259128	98.6156	832	1063	0.78269
GCF_009875825.1	GUT_GENOME000125	98.6148	915	1063	0.860771
GCF_009875825.1	GUT_GENOME019361	98.6147	867	1063	0.815616
GCF_009875825.1	GUT_GENOME134499	98.6147	846	1063	0.795861
GCF_009875825.1	GUT_GENOME111759	98.614	871	1063	0.819379
GCF_009875825.1	GUT_GENOME112850	98.6139	861	1063	0.809972
GCF_009875825.1	GUT_GENOME258340	98.6138	773	1063	0.727187
GCF_009875825.1	GUT_GENOME091992	98.6138	867	1063	0.815616
GCF_009875825.1	GUT_GENOME066316	98.6137	820	1063	0.771402
GCF_009875825.1	GUT_GENOME117558	98.6136	871	1063	0.819379
GCF_009875825.1	GUT_GENOME059925	98.6128	843	1063	0.793039
GCF_009875825.1	GUT_GENOME256352	98.6116	873	1063	0.821261
GCF_009875825.1	GUT_GENOME115859	98.6111	800	1063	0.752587
GCF_009875825.1	GUT_GENOME010860	98.6104	851	1063	0.800564
GCF_009875825.1	GUT_GENOME082433	98.6097	821	1063	0.772342
GCF_009875825.1	GUT_GENOME237856	98.6091	841	1063	0.791157
GCF_009875825.1	GUT_GENOME284646	98.6087	825	1063	0.776105
GCF_009875825.1	GUT_GENOME158904	98.6075	848	1063	0.797742
GCF_009875825.1	GUT_GENOME264599	98.6058	829	1063	0.779868
GCF_009875825.1	GUT_GENOME266386	98.6044	856	1063	0.805268
GCF_009875825.1	GUT_GENOME085781	98.6039	813	1063	0.764817
GCF_009875825.1	GUT_GENOME166107	98.6039	897	1063	0.843838
GCF_009875825.1	GUT_GENOME049441	98.6038	767	1063	0.721543
GCF_009875825.1	GUT_GENOME010758	98.6021	856	1063	0.805268
GCF_009875825.1	GUT_GENOME111634	98.6018	794	1063	0.746943
GCF_009875825.1	GUT_GENOME270040	98.6009	867	1063	0.815616
GCF_009875825.1	GUT_GENOME000112	98.6005	889	1063	0.836312
GCF_009875825.1	GUT_GENOME103790	98.6005	889	1063	0.836312
GCF_009875825.1	GUT_GENOME277922	98.6003	860	1063	0.809031
GCF_009875825.1	GUT_GENOME135457	98.6002	844	1063	0.793979
GCF_009875825.1	GUT_GENOME023100	98.6002	828	1063	0.778928
GCF_009875825.1	GUT_GENOME266421	98.5997	836	1063	0.786453
GCF_009875825.1	GUT_GENOME111083	98.5995	845	1063	0.79492
GCF_009875825.1	GUT_GENOME010670	98.5993	851	1063	0.800564
GCF_009875825.1	GUT_GENOME136702	98.5989	791	1063	0.74412
GCF_009875825.1	GUT_GENOME008999	98.5989	802	1063	0.754468
GCF_009875825.1	GUT_GENOME255144	98.5981	833	1063	0.783631
GCF_009875825.1	GUT_GENOME003464	98.5981	823	1063	0.774224
GCF_009875825.1	GUT_GENOME113876	98.5978	873	1063	0.821261
GCF_009875825.1	GUT_GENOME161752	98.5977	845	1063	0.79492
GCF_009875825.1	GUT_GENOME019439	98.5975	868	1063	0.816557
GCF_009875825.1	GUT_GENOME109942	98.5968	867	1063	0.815616
GCF_009875825.1	GUT_GENOME066404	98.5963	865	1063	0.813735
GCF_009875825.1	GUT_GENOME268588	98.5962	852	1063	0.801505
GCF_009875825.1	GUT_GENOME025140	98.5939	853	1063	0.802446
GCF_009875825.1	GUT_GENOME075751	98.5931	829	1063	0.779868
GCF_009875825.1	GUT_GENOME112913	98.5926	855	1063	0.804327
GCF_009875825.1	GUT_GENOME163101	98.5917	835	1063	0.785513
GCF_009875825.1	GUT_GENOME245251	98.59	841	1063	0.791157
GCF_009875825.1	GUT_GENOME019676	98.5899	780	1063	0.733772
GCF_009875825.1	GUT_GENOME194478	98.5898	806	1063	0.758231
GCF_009875825.1	GUT_GENOME067029	98.5897	836	1063	0.786453
GCF_009875825.1	GUT_GENOME271479	98.5877	836	1063	0.786453
GCF_009875825.1	GUT_GENOME213201	98.5872	775	1063	0.729069
GCF_009875825.1	GUT_GENOME022647	98.5866	867	1063	0.815616
GCF_009875825.1	GUT_GENOME260737	98.586	840	1063	0.790216
GCF_009875825.1	GUT_GENOME104093	98.5845	849	1063	0.798683
GCF_009875825.1	GUT_GENOME161569	98.5839	798	1063	0.750706
GCF_009875825.1	GUT_GENOME268418	98.5838	867	1063	0.815616
GCF_009875825.1	GUT_GENOME087360	98.5837	791	1063	0.74412
GCF_009875825.1	GUT_GENOME109529	98.5814	781	1063	0.734713
GCF_009875825.1	GUT_GENOME020487	98.5812	850	1063	0.799624
GCF_009875825.1	GUT_GENOME111149	98.58	859	1063	0.80809
GCF_009875825.1	GUT_GENOME104020	98.5797	864	1063	0.812794
GCF_009875825.1	GUT_GENOME138624	98.5777	826	1063	0.777046
GCF_009875825.1	GUT_GENOME073732	98.5769	825	1063	0.776105
GCF_009875825.1	GUT_GENOME279918	98.576	871	1063	0.819379
GCF_009875825.1	GUT_GENOME237017	98.5748	863	1063	0.811853
GCF_009875825.1	GUT_GENOME192351	98.5746	760	1063	0.714958
GCF_009875825.1	GUT_GENOME163483	98.5744	810	1063	0.761994
GCF_009875825.1	GUT_GENOME121919	98.5726	866	1063	0.814675
GCF_009875825.1	GUT_GENOME267929	98.5722	860	1063	0.809031
GCF_009875825.1	GUT_GENOME135508	98.5713	845	1063	0.79492
GCF_009875825.1	GUT_GENOME196289	98.5712	796	1063	0.748824
GCF_009875825.1	GUT_GENOME279997	98.5704	827	1063	0.777987
GCF_009875825.1	GUT_GENOME090196	98.5699	823	1063	0.774224
GCF_009875825.1	GUT_GENOME135465	98.5694	818	1063	0.76952
GCF_009875825.1	GUT_GENOME117100	98.5692	856	1063	0.805268
GCF_009875825.1	GUT_GENOME059886	98.5687	827	1063	0.777987
GCF_009875825.1	GUT_GENOME195922	98.5686	689	1063	0.648166
GCF_009875825.1	GUT_GENOME075867	98.5659	830	1063	0.780809
GCF_009875825.1	GUT_GENOME258310	98.5659	839	1063	0.789276
GCF_009875825.1	GUT_GENOME114065	98.5654	842	1063	0.792098
GCF_009875825.1	GUT_GENOME077627	98.5641	780	1063	0.733772
GCF_009875825.1	GUT_GENOME110623	98.5636	844	1063	0.793979
GCF_009875825.1	GUT_GENOME197173	98.5631	854	1063	0.803387
GCF_009875825.1	GUT_GENOME098902	98.563	874	1063	0.822201
GCF_009875825.1	GUT_GENOME042476	98.5628	833	1063	0.783631
GCF_009875825.1	GUT_GENOME284533	98.5625	825	1063	0.776105
GCF_009875825.1	GUT_GENOME090850	98.5625	827	1063	0.777987
GCF_009875825.1	GUT_GENOME104345	98.5616	768	1063	0.722484
GCF_009875825.1	GUT_GENOME116950	98.5614	847	1063	0.796802
GCF_009875825.1	GUT_GENOME162075	98.5613	771	1063	0.725306
GCF_009875825.1	GUT_GENOME002000	98.5611	852	1063	0.801505
GCF_009875825.1	GUT_GENOME135883	98.5611	829	1063	0.779868
GCF_009875825.1	GUT_GENOME283661	98.5603	825	1063	0.776105
GCF_009875825.1	GUT_GENOME111777	98.5591	856	1063	0.805268
GCF_009875825.1	GUT_GENOME153458	98.5577	849	1063	0.798683
GCF_009875825.1	GUT_GENOME049028	98.5572	838	1063	0.788335
GCF_009875825.1	GUT_GENOME272840	98.5571	862	1063	0.810913
GCF_009875825.1	GUT_GENOME271341	98.5569	833	1063	0.783631
GCF_009875825.1	GUT_GENOME239588	98.5561	804	1063	0.75635
GCF_009875825.1	GUT_GENOME112719	98.5554	854	1063	0.803387
GCF_009875825.1	GUT_GENOME238516	98.5539	798	1063	0.750706
GCF_009875825.1	GUT_GENOME000298	98.5523	885	1063	0.832549
GCF_009875825.1	GUT_GENOME130864	98.5515	860	1063	0.809031
GCF_009875825.1	GUT_GENOME210107	98.5508	776	1063	0.730009
GCF_009875825.1	GUT_GENOME083897	98.5504	815	1063	0.766698
GCF_009875825.1	GUT_GENOME091937	98.5501	865	1063	0.813735
GCF_009875825.1	GUT_GENOME091978	98.5499	870	1063	0.818438
GCF_009875825.1	GUT_GENOME282128	98.5497	852	1063	0.801505
GCF_009875825.1	GUT_GENOME114896	98.5496	845	1063	0.79492
GCF_009875825.1	GUT_GENOME268614	98.5488	775	1063	0.729069
GCF_009875825.1	GUT_GENOME026631	98.5484	866	1063	0.814675
GCF_009875825.1	GUT_GENOME116176	98.5483	849	1063	0.798683
GCF_009875825.1	GUT_GENOME279849	98.5482	851	1063	0.800564
GCF_009875825.1	GUT_GENOME113294	98.548	804	1063	0.75635
GCF_009875825.1	GUT_GENOME269046	98.5472	854	1063	0.803387
GCF_009875825.1	GUT_GENOME020289	98.5458	823	1063	0.774224
GCF_009875825.1	GUT_GENOME138530	98.5453	853	1063	0.802446
GCF_009875825.1	GUT_GENOME094567	98.5448	858	1063	0.80715
GCF_009875825.1	GUT_GENOME106014	98.544	846	1063	0.795861
GCF_009875825.1	GUT_GENOME024044	98.5438	848	1063	0.797742
GCF_009875825.1	GUT_GENOME118784	98.5437	811	1063	0.762935
GCF_009875825.1	GUT_GENOME163927	98.5419	724	1063	0.681091
GCF_009875825.1	GUT_GENOME272903	98.5416	858	1063	0.80715
GCF_009875825.1	GUT_GENOME094181	98.5407	847	1063	0.796802
GCF_009875825.1	GUT_GENOME106202	98.5358	875	1063	0.823142
GCF_009875825.1	GUT_GENOME025471	98.5331	868	1063	0.816557
GCF_009875825.1	GUT_GENOME043541	98.5327	868	1063	0.816557
GCF_009875825.1	GUT_GENOME271613	98.5326	857	1063	0.806209
GCF_009875825.1	GUT_GENOME259981	98.5324	837	1063	0.787394
GCF_009875825.1	GUT_GENOME114098	98.5323	860	1063	0.809031
GCF_009875825.1	GUT_GENOME215021	98.5312	737	1063	0.693321
GCF_009875825.1	GUT_GENOME273856	98.5271	826	1063	0.777046
GCF_009875825.1	GUT_GENOME270329	98.5263	853	1063	0.802446
GCF_009875825.1	GUT_GENOME284371	98.5259	849	1063	0.798683
GCF_009875825.1	GUT_GENOME107883	98.5255	826	1063	0.777046
GCF_009875825.1	GUT_GENOME268800	98.5248	742	1063	0.698024
GCF_009875825.1	GUT_GENOME197749	98.5234	810	1063	0.761994
GCF_009875825.1	GUT_GENOME267950	98.5226	770	1063	0.724365
GCF_009875825.1	GUT_GENOME133197	98.522	802	1063	0.754468
GCF_009875825.1	GUT_GENOME236933	98.5196	863	1063	0.811853
GCF_009875825.1	GUT_GENOME246199	98.519	874	1063	0.822201
GCF_009875825.1	GUT_GENOME092410	98.5185	864	1063	0.812794
GCF_009875825.1	GUT_GENOME214253	98.5184	703	1063	0.661336
GCF_009875825.1	GUT_GENOME100295	98.5174	847	1063	0.796802
GCF_009875825.1	GUT_GENOME111406	98.5172	849	1063	0.798683
GCF_009875825.1	GUT_GENOME258757	98.5169	846	1063	0.795861
GCF_009875825.1	GUT_GENOME167700	98.5164	847	1063	0.796802
GCF_009875825.1	GUT_GENOME110192	98.5163	862	1063	0.810913
GCF_009875825.1	GUT_GENOME051678	98.5158	842	1063	0.792098
GCF_009875825.1	GUT_GENOME043248	98.5128	858	1063	0.80715
GCF_009875825.1	GUT_GENOME020330	98.5114	834	1063	0.784572
GCF_009875825.1	GUT_GENOME006102	98.5105	880	1063	0.827846
GCF_009875825.1	GUT_GENOME286968	98.5102	862	1063	0.810913
GCF_009875825.1	GUT_GENOME207039	98.5098	805	1063	0.757291
GCF_009875825.1	GUT_GENOME121633	98.5094	861	1063	0.809972
GCF_009875825.1	GUT_GENOME085663	98.5066	792	1063	0.745061
GCF_009875825.1	GUT_GENOME014119	98.5062	860	1063	0.809031
GCF_009875825.1	GUT_GENOME113016	98.5041	855	1063	0.804327
GCF_009875825.1	GUT_GENOME165811	98.5029	807	1063	0.759172
GCF_009875825.1	GUT_GENOME015388	98.5028	830	1063	0.780809
GCF_009875825.1	GUT_GENOME135187	98.5025	875	1063	0.823142
GCF_009875825.1	GUT_GENOME027540	98.5017	859	1063	0.80809
GCF_009875825.1	GUT_GENOME266883	98.5013	779	1063	0.732832
GCF_009875825.1	GUT_GENOME010375	98.5011	867	1063	0.815616
GCF_009875825.1	GUT_GENOME108199	98.5008	754	1063	0.709313
GCF_009875825.1	GUT_GENOME138951	98.5001	828	1063	0.778928
GCF_009875825.1	GUT_GENOME163154	98.4983	830	1063	0.780809
GCF_009875825.1	GUT_GENOME197057	98.4978	859	1063	0.80809
GCF_009875825.1	GUT_GENOME024398	98.493	828	1063	0.778928
GCF_009875825.1	GUT_GENOME024344	98.4916	814	1063	0.765757
GCF_009875825.1	GUT_GENOME267702	98.4911	864	1063	0.812794
GCF_009875825.1	GUT_GENOME271550	98.4906	868	1063	0.816557
GCF_009875825.1	GUT_GENOME131552	98.4905	887	1063	0.834431
GCF_009875825.1	GUT_GENOME278484	98.4879	671	1063	0.631232
GCF_009875825.1	GUT_GENOME110379	98.4865	865	1063	0.813735
GCF_009875825.1	GUT_GENOME092269	98.4858	842	1063	0.792098
GCF_009875825.1	GUT_GENOME082868	98.4832	779	1063	0.732832
GCF_009875825.1	GUT_GENOME138566	98.4816	877	1063	0.825024
GCF_009875825.1	GUT_GENOME161556	98.4777	834	1063	0.784572
GCF_009875825.1	GUT_GENOME279267	98.4745	805	1063	0.757291
GCF_009875825.1	GUT_GENOME246370	98.4742	830	1063	0.780809
GCF_009875825.1	GUT_GENOME263492	98.4734	868	1063	0.816557
GCF_009875825.1	GUT_GENOME026072	98.4716	826	1063	0.777046
GCF_009875825.1	GUT_GENOME280050	98.4666	832	1063	0.78269
GCF_009875825.1	GUT_GENOME268538	98.4641	770	1063	0.724365
GCF_009875825.1	GUT_GENOME090283	98.4628	838	1063	0.788335
GCF_009875825.1	GUT_GENOME233998	98.4601	865	1063	0.813735
GCF_009875825.1	GUT_GENOME265832	98.4598	885	1063	0.832549
GCF_009875825.1	GUT_GENOME199213	98.4597	735	1063	0.691439
GCF_009875825.1	GUT_GENOME050919	98.4589	763	1063	0.71778
GCF_009875825.1	GUT_GENOME269449	98.4584	877	1063	0.825024
GCF_009875825.1	GUT_GENOME008526	98.4583	764	1063	0.718721
GCF_009875825.1	GUT_GENOME109088	98.4572	817	1063	0.768579
GCF_009875825.1	GUT_GENOME180238	98.4562	875	1063	0.823142
GCF_009875825.1	GUT_GENOME012305	98.4553	797	1063	0.749765
GCF_009875825.1	GUT_GENOME138673	98.452	866	1063	0.814675
GCF_009875825.1	GUT_GENOME155160	98.4515	821	1063	0.772342
GCF_009875825.1	GUT_GENOME082976	98.4473	833	1063	0.783631
GCF_009875825.1	GUT_GENOME010279	98.4472	879	1063	0.826905
GCF_009875825.1	GUT_GENOME280979	98.443	848	1063	0.797742
GCF_009875825.1	GUT_GENOME124318	98.443	815	1063	0.766698
GCF_009875825.1	GUT_GENOME135912	98.4429	838	1063	0.788335
GCF_009875825.1	GUT_GENOME276168	98.4405	866	1063	0.814675
GCF_009875825.1	GUT_GENOME095202	98.4386	773	1063	0.727187
GCF_009875825.1	GUT_GENOME265323	98.432	860	1063	0.809031
GCF_009875825.1	GUT_GENOME000882	98.4295	886	1063	0.83349
GCF_009875825.1	GUT_GENOME049218	98.4278	818	1063	0.76952
GCF_009875825.1	GUT_GENOME016255	98.4278	850	1063	0.799624
GCF_009875825.1	GUT_GENOME081143	98.4275	805	1063	0.757291
GCF_009875825.1	GUT_GENOME084122	98.4248	802	1063	0.754468
GCF_009875825.1	GUT_GENOME034430	98.4187	826	1063	0.777046
GCF_009875825.1	GUT_GENOME160464	98.4184	805	1063	0.757291
GCF_009875825.1	GUT_GENOME083860	98.4168	831	1063	0.78175
GCF_009875825.1	GUT_GENOME067552	98.4168	831	1063	0.78175
GCF_009875825.1	GUT_GENOME175692	98.4135	819	1063	0.770461
GCF_009875825.1	GUT_GENOME086665	98.413	685	1063	0.644403
GCF_009875825.1	GUT_GENOME078254	98.4121	787	1063	0.740357
GCF_009875825.1	GUT_GENOME085214	98.409	859	1063	0.80809
GCF_009875825.1	GUT_GENOME082421	98.4084	758	1063	0.713076
GCF_009875825.1	GUT_GENOME265545	98.4072	849	1063	0.798683
GCF_009875825.1	GUT_GENOME271116	98.4069	871	1063	0.819379
GCF_009875825.1	GUT_GENOME085081	98.4015	849	1063	0.798683
GCF_009875825.1	GUT_GENOME281057	98.3997	704	1063	0.662277
GCF_009875825.1	GUT_GENOME263446	98.3912	799	1063	0.751646
GCF_009875825.1	GUT_GENOME046626	98.3911	858	1063	0.80715
GCF_009875825.1	GUT_GENOME014895	98.3908	738	1063	0.694262
GCF_009875825.1	GUT_GENOME229489	98.388	760	1063	0.714958
GCF_009875825.1	GUT_GENOME283319	98.3875	738	1063	0.694262
GCF_009875825.1	GUT_GENOME091831	98.3863	890	1063	0.837253
GCF_009875825.1	GUT_GENOME270959	98.3761	830	1063	0.780809
GCF_009875825.1	GUT_GENOME083973	98.3639	793	1063	0.746002
GCF_009875825.1	GUT_GENOME083198	98.3572	845	1063	0.79492
GCF_009875825.1	GUT_GENOME069799	98.3543	664	1063	0.624647
GCF_009875825.1	GUT_GENOME085740	98.3514	852	1063	0.801505
GCF_009875825.1	GUT_GENOME012713	98.3511	851	1063	0.800564
GCF_009875825.1	GUT_GENOME015824	98.3493	835	1063	0.785513
GCF_009875825.1	GUT_GENOME049924	98.3486	812	1063	0.763876
GCF_009875825.1	GUT_GENOME215736	98.3471	811	1063	0.762935
GCF_009875825.1	GUT_GENOME085556	98.3466	837	1063	0.787394
GCF_009875825.1	GUT_GENOME084195	98.3448	817	1063	0.768579
GCF_009875825.1	GUT_GENOME086164	98.3419	799	1063	0.751646
GCF_009875825.1	GUT_GENOME082782	98.3339	791	1063	0.74412
GCF_009875825.1	GUT_GENOME271534	98.3305	718	1063	0.675447
GCF_009875825.1	GUT_GENOME081436	98.3142	801	1063	0.753528
GCF_009875825.1	GUT_GENOME263820	98.3104	858	1063	0.80715
GCF_009875825.1	GUT_GENOME273049	98.3088	857	1063	0.806209
GCF_009875825.1	GUT_GENOME264299	98.3066	855	1063	0.804327
GCF_009875825.1	GUT_GENOME215848	98.3047	844	1063	0.793979
GCF_009875825.1	GUT_GENOME083535	98.303	787	1063	0.740357
GCF_009875825.1	GUT_GENOME080904	98.3002	855	1063	0.804327
GCF_009875825.1	GUT_GENOME038038	98.2978	840	1063	0.790216
GCF_009875825.1	GUT_GENOME083014	98.2959	841	1063	0.791157
GCF_009875825.1	GUT_GENOME085976	98.2956	855	1063	0.804327
GCF_009875825.1	GUT_GENOME232489	98.2884	765	1063	0.719661
GCF_009875825.1	GUT_GENOME083316	98.288	846	1063	0.795861
GCF_009875825.1	GUT_GENOME082082	98.2811	843	1063	0.793039
GCF_009875825.1	GUT_GENOME014389	98.2582	845	1063	0.79492
GCF_009875825.1	GUT_GENOME262965	98.2573	847	1063	0.796802
GCF_009875825.1	GUT_GENOME044621	98.244	851	1063	0.800564
GCF_009875825.1	GUT_GENOME277462	98.2343	783	1063	0.736595
GCF_009875825.1	GUT_GENOME033907	98.2317	875	1063	0.823142
GCF_009875825.1	GUT_GENOME229271	98.2305	821	1063	0.772342
GCF_009875825.1	GUT_GENOME148080	98.2233	839	1063	0.789276
GCF_009875825.1	GUT_GENOME237808	98.1776	839	1063	0.789276
GCF_009875825.1	GUT_GENOME231053	98.1723	856	1063	0.805268
GCF_009875825.1	GUT_GENOME228870	98.1588	756	1063	0.711195
GCF_009875825.1	GUT_GENOME250382	98.1579	816	1063	0.767639
GCF_009875825.1	GUT_GENOME083729	98.1302	774	1063	0.728128
GCF_009875825.1	GUT_GENOME153335	98.111	868	1063	0.816557
GCF_009875825.1	GUT_GENOME264470	98.1034	846	1063	0.795861
GCF_009875825.1	GUT_GENOME044718	98.0945	826	1063	0.777046
GCF_009875825.1	GUT_GENOME228470	98.0879	809	1063	0.761054
GCF_009875825.1	GUT_GENOME148668	98.0577	845	1063	0.79492
GCF_009875825.1	GUT_GENOME140310	98.027	858	1063	0.80715
GCF_009875825.1	GUT_GENOME155189	98.0106	837	1063	0.787394
GCF_009875825.1	GUT_GENOME140306	98.0054	846	1063	0.795861
GCF_009875825.1	GUT_GENOME248991	97.9893	754	1063	0.709313
GCF_009875825.1	GUT_GENOME000892	97.9756	878	1063	0.825964
GCF_009875825.1	GUT_GENOME066334	97.9509	758	1063	0.713076
GCF_009875825.1	GUT_GENOME031873	97.8904	711	1063	0.668862
GCF_009875825.1	GUT_GENOME086034	97.8615	780	1063	0.733772
GCF_009875825.1	GUT_GENOME263662	97.8594	797	1063	0.749765
GCF_009875825.1	GUT_GENOME104513	97.8553	763	1063	0.71778
GCF_009875825.1	GUT_GENOME248340	97.8389	799	1063	0.751646
GCF_009875825.1	GUT_GENOME283144	97.8217	755	1063	0.710254
GCF_009875825.1	GUT_GENOME013742	97.8175	852	1063	0.801505
GCF_009875825.1	GUT_GENOME100029	97.813	834	1063	0.784572
GCF_009875825.1	GUT_GENOME233350	97.8114	839	1063	0.789276
GCF_009875825.1	GUT_GENOME081610	97.8082	807	1063	0.759172
GCF_009875825.1	GUT_GENOME159580	97.8068	699	1063	0.657573
GCF_009875825.1	GUT_GENOME017328	97.7993	794	1063	0.746943
GCF_009875825.1	GUT_GENOME000977	97.7975	855	1063	0.804327
GCF_009875825.1	GUT_GENOME081081	97.7964	825	1063	0.776105
GCF_009875825.1	GUT_GENOME236383	97.7959	768	1063	0.722484
GCF_009875825.1	GUT_GENOME086607	97.7831	835	1063	0.785513
GCF_009875825.1	GUT_GENOME153936	97.7812	807	1063	0.759172
GCF_009875825.1	GUT_GENOME049710	97.7754	812	1063	0.763876
GCF_009875825.1	GUT_GENOME148695	97.7673	847	1063	0.796802
GCF_009875825.1	GUT_GENOME016347	97.7658	834	1063	0.784572
GCF_009875825.1	GUT_GENOME085591	97.7653	835	1063	0.785513
GCF_009875825.1	GUT_GENOME021715	97.7468	797	1063	0.749765
GCF_009875825.1	GUT_GENOME149765	97.7454	827	1063	0.777987
GCF_009875825.1	GUT_GENOME214802	97.7448	760	1063	0.714958
GCF_009875825.1	GUT_GENOME086192	97.7448	758	1063	0.713076
GCF_009875825.1	GUT_GENOME187658	97.744	811	1063	0.762935
GCF_009875825.1	GUT_GENOME273099	97.7408	808	1063	0.760113
GCF_009875825.1	GUT_GENOME001379	97.7406	848	1063	0.797742
GCF_009875825.1	GUT_GENOME153487	97.7385	830	1063	0.780809
GCF_009875825.1	GUT_GENOME228489	97.7273	824	1063	0.775165
GCF_009875825.1	GUT_GENOME081040	97.7266	833	1063	0.783631
GCF_009875825.1	GUT_GENOME011628	97.7243	825	1063	0.776105
GCF_009875825.1	GUT_GENOME154908	97.7234	814	1063	0.765757
GCF_009875825.1	GUT_GENOME013190	97.7182	805	1063	0.757291
GCF_009875825.1	GUT_GENOME228455	97.7163	828	1063	0.778928
GCF_009875825.1	GUT_GENOME262865	97.7098	844	1063	0.793979
GCF_009875825.1	GUT_GENOME263227	97.708	816	1063	0.767639
GCF_009875825.1	GUT_GENOME086547	97.7003	833	1063	0.783631
GCF_009875825.1	GUT_GENOME113139	97.6949	823	1063	0.774224
GCF_009875825.1	GUT_GENOME286555	97.6635	834	1063	0.784572
GCF_009875825.1	GUT_GENOME153699	97.6632	847	1063	0.796802
GCF_009875825.1	GUT_GENOME239734	97.659	873	1063	0.821261
GCF_009875825.1	GUT_GENOME049747	97.6464	817	1063	0.768579
GCF_009875825.1	GUT_GENOME229848	97.6453	796	1063	0.748824
GCF_009875825.1	GUT_GENOME265662	97.6452	851	1063	0.800564
GCF_009875825.1	GUT_GENOME212478	97.6315	723	1063	0.680151
GCF_009875825.1	GUT_GENOME001247	97.6287	870	1063	0.818438
GCF_009875825.1	GUT_GENOME019352	97.5485	819	1063	0.770461
GCF_009875825.1	GUT_GENOME010147	97.4814	830	1063	0.780809
GCF_009875825.1	GUT_GENOME017948	97.4315	789	1063	0.742239
GCF_009875825.1	GUT_GENOME170568	95.9514	815	1063	0.766698
GCF_009875825.1	GUT_GENOME139664	95.7117	840	1063	0.790216
GCF_009875825.1	GUT_GENOME095969	89.1686	717	1063	0.674506
GCF_009875825.1	GUT_GENOME000055	89.1418	734	1063	0.690499
GCF_009875825.1	GUT_GENOME175751	89.0532	681	1063	0.64064
GCF_009875825.1	GUT_GENOME253410	89.0464	667	1063	0.627469
GCF_009875825.1	GUT_GENOME024771	89.024	676	1063	0.635936
GCF_009875825.1	GUT_GENOME106854	88.984	650	1063	0.611477
GCF_009875825.1	GUT_GENOME022026	88.9744	703	1063	0.661336
GCF_009875825.1	GUT_GENOME092872	88.9597	689	1063	0.648166
GCF_009875825.1	GUT_GENOME006175	88.9323	669	1063	0.629351
GCF_009875825.1	GUT_GENOME270947	88.9299	645	1063	0.606773
GCF_009875825.1	GUT_GENOME009318	88.9008	691	1063	0.650047
GCF_009875825.1	GUT_GENOME025769	88.8919	668	1063	0.62841
GCF_009875825.1	GUT_GENOME244955	88.8804	665	1063	0.625588
GCF_009875825.1	GUT_GENOME025698	88.8787	680	1063	0.639699
GCF_009875825.1	GUT_GENOME119387	88.8787	681	1063	0.64064
GCF_009875825.1	GUT_GENOME024892	88.8644	679	1063	0.638758
GCF_009875825.1	GUT_GENOME278076	88.864	674	1063	0.634055
GCF_009875825.1	GUT_GENOME159144	88.8634	706	1063	0.664158
GCF_009875825.1	GUT_GENOME283542	88.8618	693	1063	0.651929
GCF_009875825.1	GUT_GENOME041719	88.8569	661	1063	0.621825
GCF_009875825.1	GUT_GENOME210094	88.8427	677	1063	0.636877
GCF_009875825.1	GUT_GENOME044202	88.8425	670	1063	0.630292
GCF_009875825.1	GUT_GENOME255671	88.8205	640	1063	0.60207
GCF_009875825.1	GUT_GENOME269150	88.8189	676	1063	0.635936
GCF_009875825.1	GUT_GENOME135556	88.8167	667	1063	0.627469
GCF_009875825.1	GUT_GENOME273004	88.8165	687	1063	0.646284
GCF_009875825.1	GUT_GENOME254772	88.8134	695	1063	0.65381
GCF_009875825.1	GUT_GENOME275548	88.808	654	1063	0.61524
GCF_009875825.1	GUT_GENOME269037	88.8029	677	1063	0.636877
GCF_009875825.1	GUT_GENOME094324	88.7961	649	1063	0.610536
GCF_009875825.1	GUT_GENOME106404	88.7943	679	1063	0.638758
GCF_009875825.1	GUT_GENOME021291	88.78	609	1063	0.572907
GCF_009875825.1	GUT_GENOME264116	88.7778	674	1063	0.634055
GCF_009875825.1	GUT_GENOME257979	88.7766	701	1063	0.659454
GCF_009875825.1	GUT_GENOME247115	88.7573	682	1063	0.64158
GCF_009875825.1	GUT_GENOME286234	88.7565	695	1063	0.65381
GCF_009875825.1	GUT_GENOME025854	88.7561	685	1063	0.644403
GCF_009875825.1	GUT_GENOME003942	88.753	668	1063	0.62841
GCF_009875825.1	GUT_GENOME269593	88.7375	717	1063	0.674506
GCF_009875825.1	GUT_GENOME110666	88.7363	668	1063	0.62841
GCF_009875825.1	GUT_GENOME279781	88.7338	677	1063	0.636877
GCF_009875825.1	GUT_GENOME271232	88.7335	690	1063	0.649106
GCF_009875825.1	GUT_GENOME265934	88.726	682	1063	0.64158
GCF_009875825.1	GUT_GENOME275283	88.7234	682	1063	0.64158
GCF_009875825.1	GUT_GENOME272201	88.7213	680	1063	0.639699
GCF_009875825.1	GUT_GENOME252881	88.721	688	1063	0.647225
GCF_009875825.1	GUT_GENOME111187	88.7156	685	1063	0.644403
GCF_009875825.1	GUT_GENOME245736	88.7116	670	1063	0.630292
GCF_009875825.1	GUT_GENOME134528	88.7099	681	1063	0.64064
GCF_009875825.1	GUT_GENOME008609	88.7072	679	1063	0.638758
GCF_009875825.1	GUT_GENOME266759	88.7008	697	1063	0.655691
GCF_009875825.1	GUT_GENOME261257	88.6998	660	1063	0.620884
GCF_009875825.1	GUT_GENOME056280	88.6956	657	1063	0.618062
GCF_009875825.1	GUT_GENOME159191	88.6955	688	1063	0.647225
GCF_009875825.1	GUT_GENOME129708	88.6916	606	1063	0.570085
GCF_009875825.1	GUT_GENOME059127	88.6902	680	1063	0.639699
GCF_009875825.1	GUT_GENOME137738	88.6897	676	1063	0.635936
GCF_009875825.1	GUT_GENOME112377	88.6865	658	1063	0.619003
GCF_009875825.1	GUT_GENOME112732	88.6807	668	1063	0.62841
GCF_009875825.1	GUT_GENOME158993	88.6805	662	1063	0.622766
GCF_009875825.1	GUT_GENOME082676	88.6793	667	1063	0.627469
GCF_009875825.1	GUT_GENOME113100	88.6775	683	1063	0.642521
GCF_009875825.1	GUT_GENOME283436	88.6769	696	1063	0.654751
GCF_009875825.1	GUT_GENOME093368	88.6737	678	1063	0.637817
GCF_009875825.1	GUT_GENOME068744	88.6725	642	1063	0.603951
GCF_009875825.1	GUT_GENOME105221	88.6707	667	1063	0.627469
GCF_009875825.1	GUT_GENOME112770	88.6661	684	1063	0.643462
GCF_009875825.1	GUT_GENOME266782	88.6635	689	1063	0.648166
GCF_009875825.1	GUT_GENOME104604	88.6623	684	1063	0.643462
GCF_009875825.1	GUT_GENOME109191	88.6411	682	1063	0.64158
GCF_009875825.1	GUT_GENOME056828	88.6355	666	1063	0.626529
GCF_009875825.1	GUT_GENOME023277	88.6322	663	1063	0.623706
GCF_009875825.1	GUT_GENOME265163	88.6137	647	1063	0.608655
GCF_009875825.1	GUT_GENOME081006	88.6111	695	1063	0.65381
GCF_009875825.1	GUT_GENOME157841	88.5998	624	1063	0.587018
GCF_009875825.1	GUT_GENOME252536	88.5991	689	1063	0.648166
GCF_009875825.1	GUT_GENOME066639	88.5947	674	1063	0.634055
GCF_009875825.1	GUT_GENOME267876	88.5821	680	1063	0.639699
GCF_009875825.1	GUT_GENOME089503	88.5789	639	1063	0.601129
GCF_009875825.1	GUT_GENOME255248	88.5789	693	1063	0.651929
GCF_009875825.1	GUT_GENOME047991	88.5753	695	1063	0.65381
GCF_009875825.1	GUT_GENOME085267	88.5748	676	1063	0.635936
GCF_009875825.1	GUT_GENOME009920	88.5738	681	1063	0.64064
GCF_009875825.1	GUT_GENOME203498	88.5575	693	1063	0.651929
GCF_009875825.1	GUT_GENOME015346	88.5531	685	1063	0.644403
GCF_009875825.1	GUT_GENOME018775	88.5519	634	1063	0.596425
GCF_009875825.1	GUT_GENOME105714	88.5462	655	1063	0.616181
GCF_009875825.1	GUT_GENOME207188	88.5458	664	1063	0.624647
GCF_009875825.1	GUT_GENOME242936	88.5443	577	1063	0.542803
GCF_009875825.1	GUT_GENOME115307	88.54	673	1063	0.633114
GCF_009875825.1	GUT_GENOME086511	88.5326	669	1063	0.629351
GCF_009875825.1	GUT_GENOME154455	88.5317	700	1063	0.658514
GCF_009875825.1	GUT_GENOME068838	88.5243	625	1063	0.587959
GCF_009875825.1	GUT_GENOME086359	88.5235	657	1063	0.618062
GCF_009875825.1	GUT_GENOME272961	88.5088	697	1063	0.655691
GCF_009875825.1	GUT_GENOME105737	88.5027	688	1063	0.647225
GCF_009875825.1	GUT_GENOME153560	88.4903	598	1063	0.562559
GCF_009875825.1	GUT_GENOME101171	88.4899	677	1063	0.636877
GCF_009875825.1	GUT_GENOME117131	88.4438	640	1063	0.60207
GCF_009875825.1	GUT_GENOME264573	88.4056	610	1063	0.573848
GCF_009875825.1	GUT_GENOME012554	88.3424	598	1063	0.562559
GCF_009875825.1	GUT_GENOME229366	88.1948	642	1063	0.603951
GCF_009875825.1	GUT_GENOME007858	88.0771	646	1063	0.607714
GCF_009875825.1	GUT_GENOME113282	87.9596	652	1063	0.613358
GCF_009875825.1	GUT_GENOME268191	87.9577	671	1063	0.631232
GCF_009875825.1	GUT_GENOME011375	87.9246	623	1063	0.586077
GCF_009875825.1	GUT_GENOME116467	87.909	640	1063	0.60207
GCF_009875825.1	GUT_GENOME272179	87.8258	642	1063	0.603951
GCF_009875825.1	GUT_GENOME105828	87.8208	642	1063	0.603951
GCF_009875825.1	GUT_GENOME270469	87.8186	653	1063	0.614299
GCF_009875825.1	GUT_GENOME113462	87.8052	655	1063	0.616181
GCF_009875825.1	GUT_GENOME237738	87.8003	616	1063	0.579492
GCF_009875825.1	GUT_GENOME264383	87.7671	655	1063	0.616181
GCF_009875825.1	GUT_GENOME270483	87.7433	656	1063	0.617121
GCF_009875825.1	GUT_GENOME027156	87.7308	650	1063	0.611477
GCF_009875825.1	GUT_GENOME027245	87.7092	671	1063	0.631232
GCF_009875825.1	GUT_GENOME271271	87.6904	652	1063	0.613358
GCF_009875825.1	GUT_GENOME013574	87.6399	631	1063	0.593603
GCF_009875825.1	GUT_GENOME027212	87.5809	651	1063	0.612418
GCF_009875825.1	GUT_GENOME024713	87.5285	649	1063	0.610536
GCF_009875825.1	GUT_GENOME070912	87.5165	633	1063	0.595484
GCF_013299545.1	GUT_GENOME091994	98.8013	608	1095	0.555251
GCF_013299545.1	GUT_GENOME092134	98.7454	737	1095	0.673059
GCF_013299545.1	GUT_GENOME092321	98.6948	745	1095	0.680365
GCF_013299545.1	GUT_GENOME075245	98.571	697	1095	0.63653
GCF_013299545.1	GUT_GENOME000209	98.4594	860	1095	0.785388
GCF_013299545.1	GUT_GENOME000297	98.4431	882	1095	0.805479
GCF_013299545.1	GUT_GENOME119993	98.442	738	1095	0.673973
GCF_013299545.1	GUT_GENOME130260	98.3344	737	1095	0.673059
GCF_013299545.1	GUT_GENOME095993	98.3176	835	1095	0.762557
GCF_013299545.1	GUT_GENOME000115	98.262	852	1095	0.778082
GCF_013299545.1	GUT_GENOME000362	98.2405	881	1095	0.804566
GCF_013299545.1	GUT_GENOME000182	98.199	895	1095	0.817352
GCF_013299545.1	GUT_GENOME000253	98.1357	861	1095	0.786301
GCF_013299545.1	GUT_GENOME103072	97.9774	689	1095	0.629224
GCF_013299545.1	GUT_GENOME256852	97.8223	642	1095	0.586301
GCF_013299545.1	GUT_GENOME057128	97.6026	711	1095	0.649315
GCF_013299545.1	GUT_GENOME000923	97.5959	802	1095	0.73242
GCF_013299545.1	GUT_GENOME084013	97.5821	708	1095	0.646575
GCF_013299545.1	GUT_GENOME001513	97.4588	870	1095	0.794521
GCF_013299545.1	GUT_GENOME000886	97.3516	838	1095	0.765297
GCF_013299545.1	GUT_GENOME001472	97.3218	795	1095	0.726027
GCF_013299545.1	GUT_GENOME239788	97.2265	804	1095	0.734247
GCF_013299605.1	GUT_GENOME031660	99.7962	798	1002	0.796407
GCF_013299605.1	GUT_GENOME154920	99.4481	805	1002	0.803393
GCF_013299605.1	GUT_GENOME064063	99.4205	801	1002	0.799401
GCF_013299605.1	GUT_GENOME044942	99.4095	776	1002	0.774451
GCF_013299605.1	GUT_GENOME154601	99.4052	809	1002	0.807385
GCF_013299605.1	GUT_GENOME099786	99.376	821	1002	0.819361
GCF_013299605.1	GUT_GENOME230106	99.1428	836	1002	0.834331
GCF_013299605.1	GUT_GENOME249896	99.1386	775	1002	0.773453
GCF_013299605.1	GUT_GENOME264013	99.0494	788	1002	0.786427
GCF_013299605.1	GUT_GENOME034785	99.0432	700	1002	0.698603
GCF_013299605.1	GUT_GENOME035968	99.0117	753	1002	0.751497
GCF_013299605.1	GUT_GENOME001027	98.9953	862	1002	0.860279
GCF_013299605.1	GUT_GENOME030845	98.9788	662	1002	0.660679
GCF_013299605.1	GUT_GENOME001816	98.9566	871	1002	0.869261
GCF_013299605.1	GUT_GENOME134641	98.887	814	1002	0.812375
GCF_013299605.1	GUT_GENOME035986	98.8815	792	1002	0.790419
GCF_013299605.1	GUT_GENOME016619	98.7645	593	1002	0.591816
GCF_013299605.1	GUT_GENOME263127	98.7561	765	1002	0.763473
GCF_013299605.1	GUT_GENOME017590	98.7029	740	1002	0.738523
GCF_013299605.1	GUT_GENOME034364	98.6434	673	1002	0.671657
GCF_013299605.1	GUT_GENOME208605	98.6288	776	1002	0.774451
GCF_013299605.1	GUT_GENOME230554	98.6285	765	1002	0.763473
GCF_013299605.1	GUT_GENOME068546	98.6056	783	1002	0.781437
GCF_013299605.1	GUT_GENOME273912	98.6014	809	1002	0.807385
GCF_013299605.1	GUT_GENOME152168	98.6009	809	1002	0.807385
GCF_013299605.1	GUT_GENOME263389	98.5843	758	1002	0.756487
GCF_013299605.1	GUT_GENOME229455	98.5838	786	1002	0.784431
GCF_013299605.1	GUT_GENOME151433	98.5802	826	1002	0.824351
GCF_013299605.1	GUT_GENOME150702	98.5779	791	1002	0.789421
GCF_013299605.1	GUT_GENOME208614	98.5729	708	1002	0.706587
GCF_013299605.1	GUT_GENOME001864	98.5644	836	1002	0.834331
GCF_013299605.1	GUT_GENOME226755	98.5594	738	1002	0.736527
GCF_013299605.1	GUT_GENOME153830	98.5556	800	1002	0.798403
GCF_013299605.1	GUT_GENOME267236	98.5475	783	1002	0.781437
GCF_013299605.1	GUT_GENOME152417	98.5446	785	1002	0.783433
GCF_013299605.1	GUT_GENOME001857	98.5429	833	1002	0.831337
GCF_013299605.1	GUT_GENOME100068	98.5371	779	1002	0.777445
GCF_013299605.1	GUT_GENOME140297	98.5351	844	1002	0.842315
GCF_013299605.1	GUT_GENOME178036	98.5331	792	1002	0.790419
GCF_013299605.1	GUT_GENOME148888	98.5301	806	1002	0.804391
GCF_013299605.1	GUT_GENOME208252	98.5257	788	1002	0.786427
GCF_013299605.1	GUT_GENOME000905	98.5076	826	1002	0.824351
GCF_013299605.1	GUT_GENOME000911	98.4945	825	1002	0.823353
GCF_013299605.1	GUT_GENOME099487	98.4944	805	1002	0.803393
GCF_013299605.1	GUT_GENOME136308	98.4823	769	1002	0.767465
GCF_013299605.1	GUT_GENOME102198	98.4649	802	1002	0.800399
GCF_013299605.1	GUT_GENOME177647	98.4374	711	1002	0.709581
GCF_013299605.1	GUT_GENOME104328	98.392	759	1002	0.757485
GCF_013299605.1	GUT_GENOME219605	98.3887	798	1002	0.796407
GCF_013299605.1	GUT_GENOME267836	98.3595	825	1002	0.823353
GCF_013299605.1	GUT_GENOME015293	98.2729	784	1002	0.782435
GCF_013299605.1	GUT_GENOME037632	98.2668	770	1002	0.768463
GCF_013299605.1	GUT_GENOME009244	98.2213	788	1002	0.786427
GCF_013299605.1	GUT_GENOME199733	98.1754	766	1002	0.764471
GCF_013299605.1	GUT_GENOME081229	98.1696	770	1002	0.768463
GCF_013299605.1	GUT_GENOME009151	98.1599	801	1002	0.799401
GCF_013299605.1	GUT_GENOME082506	98.1549	757	1002	0.755489
GCF_013299605.1	GUT_GENOME248523	98.1484	695	1002	0.693613
GCF_013299605.1	GUT_GENOME123955	98.1166	779	1002	0.777445
GCF_013299605.1	GUT_GENOME209533	98.1158	776	1002	0.774451
GCF_013299605.1	GUT_GENOME003034	98.0978	770	1002	0.768463
GCF_013299605.1	GUT_GENOME084953	98.0939	771	1002	0.769461
GCF_013299605.1	GUT_GENOME094574	98.0904	757	1002	0.755489
GCF_013299605.1	GUT_GENOME044699	98.0854	751	1002	0.749501
GCF_013299605.1	GUT_GENOME271876	98.0625	772	1002	0.770459
GCF_013299605.1	GUT_GENOME273036	98.0509	788	1002	0.786427
GCF_013299605.1	GUT_GENOME086457	98.0378	750	1002	0.748503
GCF_013299605.1	GUT_GENOME084828	98.0319	764	1002	0.762475
GCF_013299605.1	GUT_GENOME207208	98.0291	756	1002	0.754491
GCF_013299605.1	GUT_GENOME104333	98.0234	720	1002	0.718563
GCF_013299605.1	GUT_GENOME277347	98.0094	777	1002	0.775449
GCF_013299605.1	GUT_GENOME140108	97.9919	801	1002	0.799401
GCF_013299605.1	GUT_GENOME013826	97.9778	780	1002	0.778443
GCF_013299605.1	GUT_GENOME269050	97.963	764	1002	0.762475
GCF_013299605.1	GUT_GENOME019059	97.9606	599	1002	0.597804
GCF_013299605.1	GUT_GENOME266536	97.9564	771	1002	0.769461
GCF_013299605.1	GUT_GENOME271730	97.9368	777	1002	0.775449
GCF_013299605.1	GUT_GENOME193646	97.9306	749	1002	0.747505
GCF_013299605.1	GUT_GENOME074494	97.9286	746	1002	0.744511
GCF_013299605.1	GUT_GENOME114128	97.9275	799	1002	0.797405
GCF_013299605.1	GUT_GENOME099820	97.9265	788	1002	0.786427
GCF_013299605.1	GUT_GENOME266306	97.9235	758	1002	0.756487
GCF_013299605.1	GUT_GENOME023119	97.9212	772	1002	0.770459
GCF_013299605.1	GUT_GENOME267551	97.9204	784	1002	0.782435
GCF_013299605.1	GUT_GENOME272956	97.9198	758	1002	0.756487
GCF_013299605.1	GUT_GENOME028168	97.9162	774	1002	0.772455
GCF_013299605.1	GUT_GENOME012444	97.9139	754	1002	0.752495
GCF_013299605.1	GUT_GENOME191475	97.9122	704	1002	0.702595
GCF_013299605.1	GUT_GENOME106352	97.9059	747	1002	0.745509
GCF_013299605.1	GUT_GENOME024396	97.9024	773	1002	0.771457
GCF_013299605.1	GUT_GENOME252179	97.9011	806	1002	0.804391
GCF_013299605.1	GUT_GENOME272085	97.8947	763	1002	0.761477
GCF_013299605.1	GUT_GENOME270400	97.8928	754	1002	0.752495
GCF_013299605.1	GUT_GENOME221291	97.8899	748	1002	0.746507
GCF_013299605.1	GUT_GENOME062172	97.8882	751	1002	0.749501
GCF_013299605.1	GUT_GENOME271902	97.8873	760	1002	0.758483
GCF_013299605.1	GUT_GENOME009417	97.8836	769	1002	0.767465
GCF_013299605.1	GUT_GENOME101902	97.8822	787	1002	0.785429
GCF_013299605.1	GUT_GENOME274419	97.8818	770	1002	0.768463
GCF_013299605.1	GUT_GENOME271689	97.8815	770	1002	0.768463
GCF_013299605.1	GUT_GENOME278488	97.874	769	1002	0.767465
GCF_013299605.1	GUT_GENOME286469	97.8706	767	1002	0.765469
GCF_013299605.1	GUT_GENOME269460	97.8691	770	1002	0.768463
GCF_013299605.1	GUT_GENOME270009	97.8676	793	1002	0.791417
GCF_013299605.1	GUT_GENOME264696	97.8639	772	1002	0.770459
GCF_013299605.1	GUT_GENOME105591	97.8621	753	1002	0.751497
GCF_013299605.1	GUT_GENOME089551	97.8619	765	1002	0.763473
GCF_013299605.1	GUT_GENOME018544	97.861	764	1002	0.762475
GCF_013299605.1	GUT_GENOME078454	97.8608	753	1002	0.751497
GCF_013299605.1	GUT_GENOME275522	97.8595	765	1002	0.763473
GCF_013299605.1	GUT_GENOME161038	97.8585	769	1002	0.767465
GCF_013299605.1	GUT_GENOME139408	97.8555	771	1002	0.769461
GCF_013299605.1	GUT_GENOME094431	97.8544	781	1002	0.779441
GCF_013299605.1	GUT_GENOME091596	97.8543	781	1002	0.779441
GCF_013299605.1	GUT_GENOME022075	97.8537	775	1002	0.773453
GCF_013299605.1	GUT_GENOME026191	97.8495	782	1002	0.780439
GCF_013299605.1	GUT_GENOME114423	97.8484	763	1002	0.761477
GCF_013299605.1	GUT_GENOME108140	97.8468	754	1002	0.752495
GCF_013299605.1	GUT_GENOME200954	97.8448	783	1002	0.781437
GCF_013299605.1	GUT_GENOME253477	97.8431	773	1002	0.771457
GCF_013299605.1	GUT_GENOME280127	97.8426	772	1002	0.770459
GCF_013299605.1	GUT_GENOME160427	97.8409	732	1002	0.730539
GCF_013299605.1	GUT_GENOME281759	97.8396	779	1002	0.777445
GCF_013299605.1	GUT_GENOME134342	97.8396	762	1002	0.760479
GCF_013299605.1	GUT_GENOME274311	97.8377	792	1002	0.790419
GCF_013299605.1	GUT_GENOME255327	97.8371	772	1002	0.770459
GCF_013299605.1	GUT_GENOME024429	97.8356	780	1002	0.778443
GCF_013299605.1	GUT_GENOME251181	97.8343	776	1002	0.774451
GCF_013299605.1	GUT_GENOME130917	97.833	756	1002	0.754491
GCF_013299605.1	GUT_GENOME023235	97.8329	782	1002	0.780439
GCF_013299605.1	GUT_GENOME000859	97.8329	798	1002	0.796407
GCF_013299605.1	GUT_GENOME279528	97.8314	787	1002	0.785429
GCF_013299605.1	GUT_GENOME023631	97.8292	781	1002	0.779441
GCF_013299605.1	GUT_GENOME022396	97.8286	780	1002	0.778443
GCF_013299605.1	GUT_GENOME252725	97.8233	792	1002	0.790419
GCF_013299605.1	GUT_GENOME104503	97.8217	777	1002	0.775449
GCF_013299605.1	GUT_GENOME271933	97.8158	779	1002	0.777445
GCF_013299605.1	GUT_GENOME117216	97.8154	774	1002	0.772455
GCF_013299605.1	GUT_GENOME115352	97.8136	783	1002	0.781437
GCF_013299605.1	GUT_GENOME004824	97.8109	789	1002	0.787425
GCF_013299605.1	GUT_GENOME275426	97.8085	743	1002	0.741517
GCF_013299605.1	GUT_GENOME284841	97.8084	799	1002	0.797405
GCF_013299605.1	GUT_GENOME251252	97.8056	782	1002	0.780439
GCF_013299605.1	GUT_GENOME134726	97.8026	748	1002	0.746507
GCF_013299605.1	GUT_GENOME265623	97.8025	740	1002	0.738523
GCF_013299605.1	GUT_GENOME280403	97.8025	769	1002	0.767465
GCF_013299605.1	GUT_GENOME281974	97.802	807	1002	0.805389
GCF_013299605.1	GUT_GENOME193078	97.7996	759	1002	0.757485
GCF_013299605.1	GUT_GENOME282714	97.7993	775	1002	0.773453
GCF_013299605.1	GUT_GENOME281721	97.7977	784	1002	0.782435
GCF_013299605.1	GUT_GENOME196065	97.7946	757	1002	0.755489
GCF_013299605.1	GUT_GENOME007468	97.7928	782	1002	0.780439
GCF_013299605.1	GUT_GENOME273976	97.7895	788	1002	0.786427
GCF_013299605.1	GUT_GENOME265862	97.7854	763	1002	0.761477
GCF_013299605.1	GUT_GENOME269124	97.7853	747	1002	0.745509
GCF_013299605.1	GUT_GENOME161151	97.7845	758	1002	0.756487
GCF_013299605.1	GUT_GENOME135134	97.7845	761	1002	0.759481
GCF_013299605.1	GUT_GENOME022334	97.7843	776	1002	0.774451
GCF_013299605.1	GUT_GENOME266093	97.7825	792	1002	0.790419
GCF_013299605.1	GUT_GENOME106216	97.7817	771	1002	0.769461
GCF_013299605.1	GUT_GENOME110442	97.7802	764	1002	0.762475
GCF_013299605.1	GUT_GENOME251674	97.7798	790	1002	0.788423
GCF_013299605.1	GUT_GENOME133109	97.7795	773	1002	0.771457
GCF_013299605.1	GUT_GENOME270072	97.7789	770	1002	0.768463
GCF_013299605.1	GUT_GENOME256764	97.7781	756	1002	0.754491
GCF_013299605.1	GUT_GENOME137505	97.7767	788	1002	0.786427
GCF_013299605.1	GUT_GENOME213139	97.7753	761	1002	0.759481
GCF_013299605.1	GUT_GENOME024754	97.7751	762	1002	0.760479
GCF_013299605.1	GUT_GENOME093489	97.7743	784	1002	0.782435
GCF_013299605.1	GUT_GENOME118048	97.7738	768	1002	0.766467
GCF_013299605.1	GUT_GENOME074442	97.7702	779	1002	0.777445
GCF_013299605.1	GUT_GENOME163738	97.7695	682	1002	0.680639
GCF_013299605.1	GUT_GENOME279568	97.7691	676	1002	0.674651
GCF_013299605.1	GUT_GENOME106042	97.7658	762	1002	0.760479
GCF_013299605.1	GUT_GENOME059084	97.7624	770	1002	0.768463
GCF_013299605.1	GUT_GENOME011068	97.7523	792	1002	0.790419
GCF_013299605.1	GUT_GENOME093880	97.7511	780	1002	0.778443
GCF_013299605.1	GUT_GENOME285246	97.7511	784	1002	0.782435
GCF_013299605.1	GUT_GENOME138108	97.7486	767	1002	0.765469
GCF_013299605.1	GUT_GENOME273399	97.7474	791	1002	0.789421
GCF_013299605.1	GUT_GENOME175569	97.7434	794	1002	0.792415
GCF_013299605.1	GUT_GENOME251904	97.7374	808	1002	0.806387
GCF_013299605.1	GUT_GENOME004978	97.7362	736	1002	0.734531
GCF_013299605.1	GUT_GENOME051984	97.736	782	1002	0.780439
GCF_013299605.1	GUT_GENOME105492	97.7357	744	1002	0.742515
GCF_013299605.1	GUT_GENOME282957	97.7337	796	1002	0.794411
GCF_013299605.1	GUT_GENOME105403	97.732	773	1002	0.771457
GCF_013299605.1	GUT_GENOME068317	97.7295	775	1002	0.773453
GCF_013299605.1	GUT_GENOME134129	97.7267	774	1002	0.772455
GCF_013299605.1	GUT_GENOME122238	97.7227	786	1002	0.784431
GCF_013299605.1	GUT_GENOME110394	97.7204	764	1002	0.762475
GCF_013299605.1	GUT_GENOME134311	97.7147	756	1002	0.754491
GCF_013299605.1	GUT_GENOME216494	97.7101	771	1002	0.769461
GCF_013299605.1	GUT_GENOME208494	97.7079	649	1002	0.647705
GCF_013299605.1	GUT_GENOME209256	97.7015	755	1002	0.753493
GCF_013299605.1	GUT_GENOME253004	97.7009	797	1002	0.795409
GCF_013299605.1	GUT_GENOME282833	97.7004	747	1002	0.745509
GCF_013299605.1	GUT_GENOME254434	97.6955	778	1002	0.776447
GCF_013299605.1	GUT_GENOME272685	97.6919	795	1002	0.793413
GCF_013299605.1	GUT_GENOME109432	97.6714	765	1002	0.763473
GCF_013299605.1	GUT_GENOME252203	97.6546	775	1002	0.773453
GCF_013299605.1	GUT_GENOME015222	97.6519	826	1002	0.824351
GCF_013299605.1	GUT_GENOME000138	97.6037	829	1002	0.827345
GCF_013299605.1	GUT_GENOME275214	97.5715	739	1002	0.737525
GCF_013299605.1	GUT_GENOME161047	94.3323	568	1002	0.566866
GCF_013299605.1	GUT_GENOME276725	94.3013	684	1002	0.682635
GCF_013299605.1	GUT_GENOME026696	94.2739	676	1002	0.674651
GCF_013299605.1	GUT_GENOME000864	94.222	729	1002	0.727545
GCF_013299605.1	GUT_GENOME012076	94.1854	741	1002	0.739521
GCF_013299605.1	GUT_GENOME209369	94.18	696	1002	0.694611
GCF_013299605.1	GUT_GENOME022984	94.1686	687	1002	0.685629
GCF_013299605.1	GUT_GENOME016657	94.1682	657	1002	0.655689
GCF_013299605.1	GUT_GENOME268774	94.1477	691	1002	0.689621
GCF_013299605.1	GUT_GENOME284963	94.1419	700	1002	0.698603
GCF_013299605.1	GUT_GENOME209341	94.1412	679	1002	0.677645
GCF_013299605.1	GUT_GENOME018447	94.1357	670	1002	0.668663
GCF_013299605.1	GUT_GENOME279157	94.1345	716	1002	0.714571
GCF_013299605.1	GUT_GENOME263067	94.1178	723	1002	0.721557
GCF_013299605.1	GUT_GENOME105380	94.1038	713	1002	0.711577
GCF_013299605.1	GUT_GENOME247944	94.0982	710	1002	0.708583
GCF_013299605.1	GUT_GENOME260698	94.0819	708	1002	0.706587
GCF_013299605.1	GUT_GENOME260601	94.0726	707	1002	0.705589
GCF_013299605.1	GUT_GENOME282281	94.0718	707	1002	0.705589
GCF_013299605.1	GUT_GENOME272525	94.0698	710	1002	0.708583
GCF_013299605.1	GUT_GENOME065744	94.0682	713	1002	0.711577
GCF_013299605.1	GUT_GENOME260480	94.0562	726	1002	0.724551
GCF_013299605.1	GUT_GENOME271842	94.0561	713	1002	0.711577
GCF_013299605.1	GUT_GENOME015627	94.0538	712	1002	0.710579
GCF_013299605.1	GUT_GENOME208210	94.0537	676	1002	0.674651
GCF_013299605.1	GUT_GENOME056865	94.053	716	1002	0.714571
GCF_013299605.1	GUT_GENOME283017	94.0527	696	1002	0.694611
GCF_013299605.1	GUT_GENOME116561	94.0499	697	1002	0.695609
GCF_013299605.1	GUT_GENOME126973	94.047	703	1002	0.701597
GCF_013299605.1	GUT_GENOME101768	94.0456	706	1002	0.704591
GCF_013299605.1	GUT_GENOME106289	94.0422	695	1002	0.693613
GCF_013299605.1	GUT_GENOME100689	94.0411	721	1002	0.719561
GCF_013299605.1	GUT_GENOME278548	94.0405	722	1002	0.720559
GCF_013299605.1	GUT_GENOME176061	94.0333	710	1002	0.708583
GCF_013299605.1	GUT_GENOME110240	94.031	720	1002	0.718563
GCF_013299605.1	GUT_GENOME067945	94.0306	720	1002	0.718563
GCF_013299605.1	GUT_GENOME252430	94.0252	676	1002	0.674651
GCF_013299605.1	GUT_GENOME080383	94.0226	718	1002	0.716567
GCF_013299605.1	GUT_GENOME255470	94.0224	718	1002	0.716567
GCF_013299605.1	GUT_GENOME270366	94.0208	697	1002	0.695609
GCF_013299605.1	GUT_GENOME098865	94.0207	748	1002	0.746507
GCF_013299605.1	GUT_GENOME095961	94.0184	741	1002	0.739521
GCF_013299605.1	GUT_GENOME104108	94.0171	722	1002	0.720559
GCF_013299605.1	GUT_GENOME254038	94.0134	722	1002	0.720559
GCF_013299605.1	GUT_GENOME276425	94.013	706	1002	0.704591
GCF_013299605.1	GUT_GENOME011466	94.0091	690	1002	0.688623
GCF_013299605.1	GUT_GENOME009003	94.0088	724	1002	0.722555
GCF_013299605.1	GUT_GENOME105205	94.0068	720	1002	0.718563
GCF_013299605.1	GUT_GENOME007729	94.006	719	1002	0.717565
GCF_013299605.1	GUT_GENOME117486	94.0039	709	1002	0.707585
GCF_013299605.1	GUT_GENOME284563	94.0019	687	1002	0.685629
GCF_013299605.1	GUT_GENOME121018	94.0008	724	1002	0.722555
GCF_013299605.1	GUT_GENOME208723	93.9987	683	1002	0.681637
GCF_013299605.1	GUT_GENOME008940	93.9983	708	1002	0.706587
GCF_013299605.1	GUT_GENOME245890	93.9967	707	1002	0.705589
GCF_013299605.1	GUT_GENOME093156	93.9947	687	1002	0.685629
GCF_013299605.1	GUT_GENOME101020	93.9945	719	1002	0.717565
GCF_013299605.1	GUT_GENOME004884	93.9942	710	1002	0.708583
GCF_013299605.1	GUT_GENOME094176	93.9938	725	1002	0.723553
GCF_013299605.1	GUT_GENOME099248	93.9934	719	1002	0.717565
GCF_013299605.1	GUT_GENOME057262	93.9903	718	1002	0.716567
GCF_013299605.1	GUT_GENOME023579	93.9887	688	1002	0.686627
GCF_013299605.1	GUT_GENOME275687	93.9887	723	1002	0.721557
GCF_013299605.1	GUT_GENOME108919	93.9885	700	1002	0.698603
GCF_013299605.1	GUT_GENOME281118	93.9882	698	1002	0.696607
GCF_013299605.1	GUT_GENOME111414	93.985	733	1002	0.731537
GCF_013299605.1	GUT_GENOME093252	93.977	711	1002	0.709581
GCF_013299605.1	GUT_GENOME022882	93.9735	709	1002	0.707585
GCF_013299605.1	GUT_GENOME262529	93.9692	694	1002	0.692615
GCF_013299605.1	GUT_GENOME154176	93.9648	690	1002	0.688623
GCF_013299605.1	GUT_GENOME002147	93.9637	714	1002	0.712575
GCF_013299605.1	GUT_GENOME252484	93.9604	665	1002	0.663673
GCF_013299605.1	GUT_GENOME280584	93.9525	677	1002	0.675649
GCF_013299605.1	GUT_GENOME136690	93.9516	709	1002	0.707585
GCF_013299605.1	GUT_GENOME150537	93.951	716	1002	0.714571
GCF_013299605.1	GUT_GENOME159779	93.9447	617	1002	0.615768
GCF_013299605.1	GUT_GENOME025925	93.9417	655	1002	0.653693
GCF_013299605.1	GUT_GENOME018571	93.9409	698	1002	0.696607
GCF_013299605.1	GUT_GENOME162300	93.9334	638	1002	0.636727
GCF_013299605.1	GUT_GENOME153878	93.9329	712	1002	0.710579
GCF_013299605.1	GUT_GENOME120648	93.9269	740	1002	0.738523
GCF_013299605.1	GUT_GENOME137185	93.9263	701	1002	0.699601
GCF_013299605.1	GUT_GENOME253636	93.9209	725	1002	0.723553
GCF_013299605.1	GUT_GENOME014339	93.9202	687	1002	0.685629
GCF_013299605.1	GUT_GENOME284259	93.9182	679	1002	0.677645
GCF_013299605.1	GUT_GENOME210689	93.9179	634	1002	0.632735
GCF_013299605.1	GUT_GENOME133064	93.9174	698	1002	0.696607
GCF_013299605.1	GUT_GENOME134173	93.915	723	1002	0.721557
GCF_013299605.1	GUT_GENOME268670	93.9147	687	1002	0.685629
GCF_013299605.1	GUT_GENOME274022	93.9111	728	1002	0.726547
GCF_013299605.1	GUT_GENOME108683	93.9043	677	1002	0.675649
GCF_013299605.1	GUT_GENOME113805	93.8992	729	1002	0.727545
GCF_013299605.1	GUT_GENOME161015	93.8984	652	1002	0.650699
GCF_013299605.1	GUT_GENOME267426	93.896	700	1002	0.698603
GCF_013299605.1	GUT_GENOME264752	93.8919	651	1002	0.649701
GCF_013299605.1	GUT_GENOME271895	93.8872	722	1002	0.720559
GCF_013299605.1	GUT_GENOME251019	93.8856	688	1002	0.686627
GCF_013299605.1	GUT_GENOME259806	93.8738	698	1002	0.696607
GCF_013299605.1	GUT_GENOME273480	93.8683	706	1002	0.704591
GCF_013299605.1	GUT_GENOME193475	93.8528	735	1002	0.733533
GCF_013299605.1	GUT_GENOME117489	93.8449	696	1002	0.694611
GCF_013299605.1	GUT_GENOME253395	93.8383	706	1002	0.704591
GCF_013299605.1	GUT_GENOME138866	93.8286	699	1002	0.697605
GCF_013299605.1	GUT_GENOME110933	93.8272	704	1002	0.702595
GCF_013299605.1	GUT_GENOME079410	93.8265	710	1002	0.708583
GCF_013299605.1	GUT_GENOME279401	93.8233	714	1002	0.712575
GCF_013299605.1	GUT_GENOME256659	93.8206	743	1002	0.741517
GCF_013299605.1	GUT_GENOME252821	93.8104	691	1002	0.689621
GCF_013299605.1	GUT_GENOME256685	93.8034	716	1002	0.714571
GCF_013299605.1	GUT_GENOME054930	93.7918	592	1002	0.590818
GCF_013299605.1	GUT_GENOME269679	93.7705	726	1002	0.724551
GCF_013299605.1	GUT_GENOME108755	93.753	718	1002	0.716567
GCF_013299605.1	GUT_GENOME260101	93.7479	715	1002	0.713573
GCF_013299605.1	GUT_GENOME212642	93.7423	652	1002	0.650699
GCF_013299605.1	GUT_GENOME162800	93.7031	629	1002	0.627745
GCF_013299605.1	GUT_GENOME132920	93.692	689	1002	0.687625
GCF_013299605.1	GUT_GENOME136152	93.6848	651	1002	0.649701
GCF_013299665.1	GUT_GENOME091994	98.7882	609	1094	0.556673
GCF_013299665.1	GUT_GENOME092321	98.7643	744	1094	0.680073
GCF_013299665.1	GUT_GENOME092134	98.7247	741	1094	0.677331
GCF_013299665.1	GUT_GENOME075245	98.5786	694	1094	0.634369
GCF_013299665.1	GUT_GENOME119993	98.4502	738	1094	0.674589
GCF_013299665.1	GUT_GENOME000209	98.4047	861	1094	0.78702
GCF_013299665.1	GUT_GENOME000297	98.3897	887	1094	0.810786
GCF_013299665.1	GUT_GENOME130260	98.3364	737	1094	0.673675
GCF_013299665.1	GUT_GENOME000115	98.2687	853	1094	0.779707
GCF_013299665.1	GUT_GENOME095993	98.2268	838	1094	0.765996
GCF_013299665.1	GUT_GENOME000362	98.2136	880	1094	0.804388
GCF_013299665.1	GUT_GENOME000182	98.1801	893	1094	0.816271
GCF_013299665.1	GUT_GENOME000253	98.1322	861	1094	0.78702
GCF_013299665.1	GUT_GENOME103072	97.9395	698	1094	0.638026
GCF_013299665.1	GUT_GENOME256852	97.8094	642	1094	0.586837
GCF_013299665.1	GUT_GENOME057128	97.5891	715	1094	0.653565
GCF_013299665.1	GUT_GENOME084013	97.5881	711	1094	0.649909
GCF_013299665.1	GUT_GENOME000923	97.4455	809	1094	0.739488
GCF_013299665.1	GUT_GENOME001513	97.4382	869	1094	0.794333
GCF_013299665.1	GUT_GENOME000886	97.3818	838	1094	0.765996
GCF_013299665.1	GUT_GENOME001472	97.2131	806	1094	0.736746
GCF_013299665.1	GUT_GENOME239788	97.1752	804	1094	0.734918
GCF_013299685.1	GUT_GENOME091994	98.7979	604	1095	0.551598
GCF_013299685.1	GUT_GENOME092321	98.7399	741	1095	0.676712
GCF_013299685.1	GUT_GENOME092134	98.7055	738	1095	0.673973
GCF_013299685.1	GUT_GENOME075245	98.529	695	1095	0.634703
GCF_013299685.1	GUT_GENOME119993	98.444	736	1095	0.672146
GCF_013299685.1	GUT_GENOME000209	98.4185	860	1095	0.785388
GCF_013299685.1	GUT_GENOME000297	98.3764	883	1095	0.806393
GCF_013299685.1	GUT_GENOME130260	98.313	734	1095	0.67032
GCF_013299685.1	GUT_GENOME000115	98.2291	850	1095	0.776256
GCF_013299685.1	GUT_GENOME095993	98.189	839	1095	0.76621
GCF_013299685.1	GUT_GENOME000362	98.177	880	1095	0.803653
GCF_013299685.1	GUT_GENOME000182	98.122	894	1095	0.816438
GCF_013299685.1	GUT_GENOME000253	98.117	858	1095	0.783562
GCF_013299685.1	GUT_GENOME103072	97.8877	695	1095	0.634703
GCF_013299685.1	GUT_GENOME256852	97.8081	639	1095	0.583562
GCF_013299685.1	GUT_GENOME084013	97.5936	708	1095	0.646575
GCF_013299685.1	GUT_GENOME057128	97.5683	711	1095	0.649315
GCF_013299685.1	GUT_GENOME000923	97.5274	799	1095	0.72968
GCF_013299685.1	GUT_GENOME001513	97.4297	865	1095	0.789954
GCF_013299685.1	GUT_GENOME000886	97.3316	837	1095	0.764384
GCF_013299685.1	GUT_GENOME001472	97.2514	799	1095	0.72968
GCF_013299685.1	GUT_GENOME239788	97.1418	805	1095	0.73516
GCF_013299745.1	GUT_GENOME091994	98.7835	609	1093	0.557182
GCF_013299745.1	GUT_GENOME092134	98.7537	739	1093	0.676121
GCF_013299745.1	GUT_GENOME092321	98.7484	744	1093	0.680695
GCF_013299745.1	GUT_GENOME075245	98.5748	696	1093	0.63678
GCF_013299745.1	GUT_GENOME119993	98.4324	738	1093	0.675206
GCF_013299745.1	GUT_GENOME000297	98.4231	880	1093	0.805124
GCF_013299745.1	GUT_GENOME000209	98.386	861	1093	0.78774
GCF_013299745.1	GUT_GENOME130260	98.3472	736	1093	0.673376
GCF_013299745.1	GUT_GENOME000115	98.2555	849	1093	0.776761
GCF_013299745.1	GUT_GENOME095993	98.2365	838	1093	0.766697
GCF_013299745.1	GUT_GENOME000362	98.1919	881	1093	0.806038
GCF_013299745.1	GUT_GENOME000182	98.1659	891	1093	0.815188
GCF_013299745.1	GUT_GENOME000253	98.1259	861	1093	0.78774
GCF_013299745.1	GUT_GENOME103072	97.9233	695	1093	0.635865
GCF_013299745.1	GUT_GENOME256852	97.7671	643	1093	0.588289
GCF_013299745.1	GUT_GENOME084013	97.6026	708	1093	0.647758
GCF_013299745.1	GUT_GENOME057128	97.5817	712	1093	0.651418
GCF_013299745.1	GUT_GENOME000923	97.5161	804	1093	0.73559
GCF_013299745.1	GUT_GENOME001513	97.3773	871	1093	0.796889
GCF_013299745.1	GUT_GENOME000886	97.3517	837	1093	0.765782
GCF_013299745.1	GUT_GENOME001472	97.2084	801	1093	0.732845
GCF_013299745.1	GUT_GENOME239788	97.1687	804	1093	0.73559
GCF_013299755.1	GUT_GENOME091994	98.6836	629	1044	0.60249
GCF_013299755.1	GUT_GENOME119993	98.543	732	1044	0.701149
GCF_013299755.1	GUT_GENOME092134	98.48	732	1044	0.701149
GCF_013299755.1	GUT_GENOME092321	98.4637	716	1044	0.685824
GCF_013299755.1	GUT_GENOME075245	98.3873	700	1044	0.670498
GCF_013299755.1	GUT_GENOME000297	98.2924	852	1044	0.816092
GCF_013299755.1	GUT_GENOME000362	98.2888	858	1044	0.821839
GCF_013299755.1	GUT_GENOME000209	98.229	822	1044	0.787356
GCF_013299755.1	GUT_GENOME130260	98.2112	749	1044	0.717433
GCF_013299755.1	GUT_GENOME000182	98.2109	861	1044	0.824713
GCF_013299755.1	GUT_GENOME095993	98.1621	845	1044	0.809387
GCF_013299755.1	GUT_GENOME000115	98.1018	850	1044	0.814176
GCF_013299755.1	GUT_GENOME103072	97.9344	701	1044	0.671456
GCF_013299755.1	GUT_GENOME256852	97.8641	638	1044	0.611111
GCF_013299755.1	GUT_GENOME084013	97.8387	712	1044	0.681992
GCF_013299755.1	GUT_GENOME000253	97.8309	832	1044	0.796935
GCF_013299755.1	GUT_GENOME057128	97.6666	718	1044	0.687739
GCF_013299755.1	GUT_GENOME000923	97.5353	809	1044	0.774904
GCF_013299755.1	GUT_GENOME001513	97.533	839	1044	0.80364
GCF_013299755.1	GUT_GENOME001472	97.4458	800	1044	0.766284
GCF_013299755.1	GUT_GENOME000886	97.4032	845	1044	0.809387
GCF_013299755.1	GUT_GENOME239788	97.1793	805	1044	0.771073
GCF_013299925.1	GUT_GENOME000362	99.4654	943	1053	0.895537
GCF_013299925.1	GUT_GENOME000182	99.3449	980	1053	0.930674
GCF_013299925.1	GUT_GENOME119993	99.3	772	1053	0.733143
GCF_013299925.1	GUT_GENOME095993	98.8615	866	1053	0.822412
GCF_013299925.1	GUT_GENOME091994	98.6284	606	1053	0.575499
GCF_013299925.1	GUT_GENOME075245	98.6146	708	1053	0.672365
GCF_013299925.1	GUT_GENOME092134	98.4793	708	1053	0.672365
GCF_013299925.1	GUT_GENOME092321	98.3009	721	1053	0.68471
GCF_013299925.1	GUT_GENOME130260	98.2984	745	1053	0.707502
GCF_013299925.1	GUT_GENOME000297	98.2768	882	1053	0.837607
GCF_013299925.1	GUT_GENOME000115	98.2415	859	1053	0.815764
GCF_013299925.1	GUT_GENOME000253	98.1337	840	1053	0.797721
GCF_013299925.1	GUT_GENOME103072	98.1176	706	1053	0.670465
GCF_013299925.1	GUT_GENOME256852	98.0628	657	1053	0.623932
GCF_013299925.1	GUT_GENOME000209	98.05	860	1053	0.816714
GCF_013299925.1	GUT_GENOME084013	97.8816	732	1053	0.695157
GCF_013299925.1	GUT_GENOME057128	97.8268	728	1053	0.691358
GCF_013299925.1	GUT_GENOME000923	97.6613	818	1053	0.776828
GCF_013299925.1	GUT_GENOME001472	97.6089	823	1053	0.781576
GCF_013299925.1	GUT_GENOME000886	97.5644	844	1053	0.801519
GCF_013299925.1	GUT_GENOME001513	97.486	855	1053	0.811966
GCF_013299925.1	GUT_GENOME239788	97.483	830	1053	0.788224
GCF_013300095.1	GUT_GENOME091994	98.8602	611	1045	0.584689
GCF_013300095.1	GUT_GENOME119993	98.512	735	1045	0.703349
GCF_013300095.1	GUT_GENOME092321	98.4976	731	1045	0.699522
GCF_013300095.1	GUT_GENOME092134	98.4707	708	1045	0.677512
GCF_013300095.1	GUT_GENOME075245	98.4695	703	1045	0.672727
GCF_013300095.1	GUT_GENOME000209	98.2175	845	1045	0.808612
GCF_013300095.1	GUT_GENOME130260	98.2088	729	1045	0.697608
GCF_013300095.1	GUT_GENOME000115	98.1264	840	1045	0.803828
GCF_013300095.1	GUT_GENOME000297	98.0852	851	1045	0.814354
GCF_013300095.1	GUT_GENOME000362	98.0109	844	1045	0.807656
GCF_013300095.1	GUT_GENOME000253	98.0032	862	1045	0.82488
GCF_013300095.1	GUT_GENOME095993	97.9911	810	1045	0.77512
GCF_013300095.1	GUT_GENOME000182	97.9038	864	1045	0.826794
GCF_013300095.1	GUT_GENOME103072	97.8837	700	1045	0.669856
GCF_013300095.1	GUT_GENOME256852	97.7537	640	1045	0.61244
GCF_013300095.1	GUT_GENOME084013	97.708	717	1045	0.686124
GCF_013300095.1	GUT_GENOME000923	97.5796	809	1045	0.774163
GCF_013300095.1	GUT_GENOME057128	97.5501	719	1045	0.688038
GCF_013300095.1	GUT_GENOME001472	97.3494	804	1045	0.769378
GCF_013300095.1	GUT_GENOME239788	97.2945	802	1045	0.767464
GCF_013300095.1	GUT_GENOME000886	97.2447	796	1045	0.761722
GCF_013300095.1	GUT_GENOME001513	97.2093	813	1045	0.77799
GCF_013300105.1	GUT_GENOME031660	99.7716	802	1006	0.797217
GCF_013300105.1	GUT_GENOME154920	99.4592	806	1006	0.801193
GCF_013300105.1	GUT_GENOME064063	99.444	803	1006	0.798211
GCF_013300105.1	GUT_GENOME044942	99.4209	774	1006	0.769384
GCF_013300105.1	GUT_GENOME154601	99.3999	811	1006	0.806163
GCF_013300105.1	GUT_GENOME099786	99.3799	821	1006	0.816103
GCF_013300105.1	GUT_GENOME230106	99.167	835	1006	0.83002
GCF_013300105.1	GUT_GENOME249896	99.1114	778	1006	0.77336
GCF_013300105.1	GUT_GENOME034785	99.0746	698	1006	0.693837
GCF_013300105.1	GUT_GENOME030845	99.0225	657	1006	0.653082
GCF_013300105.1	GUT_GENOME264013	99.011	791	1006	0.786282
GCF_013300105.1	GUT_GENOME035968	99.0066	754	1006	0.749503
GCF_013300105.1	GUT_GENOME001027	99.0039	863	1006	0.857853
GCF_013300105.1	GUT_GENOME001816	98.9763	871	1006	0.865805
GCF_013300105.1	GUT_GENOME134641	98.8866	814	1006	0.809145
GCF_013300105.1	GUT_GENOME035986	98.8539	796	1006	0.791252
GCF_013300105.1	GUT_GENOME016619	98.7745	597	1006	0.593439
GCF_013300105.1	GUT_GENOME263127	98.7618	763	1006	0.758449
GCF_013300105.1	GUT_GENOME017590	98.713	737	1006	0.732604
GCF_013300105.1	GUT_GENOME230554	98.6486	764	1006	0.759443
GCF_013300105.1	GUT_GENOME068546	98.6245	786	1006	0.781312
GCF_013300105.1	GUT_GENOME208605	98.6229	780	1006	0.775348
GCF_013300105.1	GUT_GENOME226755	98.6131	733	1006	0.728628
GCF_013300105.1	GUT_GENOME034364	98.6127	676	1006	0.671968
GCF_013300105.1	GUT_GENOME229455	98.603	788	1006	0.7833
GCF_013300105.1	GUT_GENOME150702	98.6015	793	1006	0.78827
GCF_013300105.1	GUT_GENOME152168	98.6	811	1006	0.806163
GCF_013300105.1	GUT_GENOME153830	98.5943	799	1006	0.794235
GCF_013300105.1	GUT_GENOME263389	98.5935	758	1006	0.753479
GCF_013300105.1	GUT_GENOME151433	98.5904	824	1006	0.819085
GCF_013300105.1	GUT_GENOME273912	98.5863	810	1006	0.805169
GCF_013300105.1	GUT_GENOME152417	98.5493	790	1006	0.785288
GCF_013300105.1	GUT_GENOME178036	98.5469	787	1006	0.782306
GCF_013300105.1	GUT_GENOME267236	98.5401	785	1006	0.780318
GCF_013300105.1	GUT_GENOME208614	98.5391	712	1006	0.707753
GCF_013300105.1	GUT_GENOME140297	98.5371	851	1006	0.845924
GCF_013300105.1	GUT_GENOME100068	98.5344	779	1006	0.774354
GCF_013300105.1	GUT_GENOME208252	98.5193	790	1006	0.785288
GCF_013300105.1	GUT_GENOME000911	98.514	826	1006	0.821074
GCF_013300105.1	GUT_GENOME177647	98.51	705	1006	0.700795
GCF_013300105.1	GUT_GENOME148888	98.5077	810	1006	0.805169
GCF_013300105.1	GUT_GENOME001864	98.5024	841	1006	0.835984
GCF_013300105.1	GUT_GENOME000905	98.4942	834	1006	0.829026
GCF_013300105.1	GUT_GENOME136308	98.4843	770	1006	0.765408
GCF_013300105.1	GUT_GENOME001857	98.4836	836	1006	0.831014
GCF_013300105.1	GUT_GENOME099487	98.4817	809	1006	0.804175
GCF_013300105.1	GUT_GENOME102198	98.4815	800	1006	0.795229
GCF_013300105.1	GUT_GENOME104328	98.4183	759	1006	0.754473
GCF_013300105.1	GUT_GENOME219605	98.4156	794	1006	0.789264
GCF_013300105.1	GUT_GENOME267836	98.3777	825	1006	0.82008
GCF_013300105.1	GUT_GENOME015293	98.2857	786	1006	0.781312
GCF_013300105.1	GUT_GENOME037632	98.2499	770	1006	0.765408
GCF_013300105.1	GUT_GENOME009244	98.2169	788	1006	0.7833
GCF_013300105.1	GUT_GENOME081229	98.2076	768	1006	0.763419
GCF_013300105.1	GUT_GENOME082506	98.1622	756	1006	0.751491
GCF_013300105.1	GUT_GENOME199733	98.1611	769	1006	0.764414
GCF_013300105.1	GUT_GENOME248523	98.158	694	1006	0.689861
GCF_013300105.1	GUT_GENOME009151	98.158	802	1006	0.797217
GCF_013300105.1	GUT_GENOME123955	98.1288	780	1006	0.775348
GCF_013300105.1	GUT_GENOME003034	98.1213	767	1006	0.762425
GCF_013300105.1	GUT_GENOME209533	98.1209	772	1006	0.767396
GCF_013300105.1	GUT_GENOME094574	98.1177	757	1006	0.752485
GCF_013300105.1	GUT_GENOME084953	98.1109	775	1006	0.770378
GCF_013300105.1	GUT_GENOME044699	98.1037	751	1006	0.746521
GCF_013300105.1	GUT_GENOME271876	98.0755	773	1006	0.76839
GCF_013300105.1	GUT_GENOME086457	98.0643	751	1006	0.746521
GCF_013300105.1	GUT_GENOME273036	98.0597	791	1006	0.786282
GCF_013300105.1	GUT_GENOME207208	98.0581	753	1006	0.748509
GCF_013300105.1	GUT_GENOME277347	98.0406	778	1006	0.77336
GCF_013300105.1	GUT_GENOME104333	98.0366	719	1006	0.714712
GCF_013300105.1	GUT_GENOME140108	98.0334	802	1006	0.797217
GCF_013300105.1	GUT_GENOME084828	98.0109	768	1006	0.763419
GCF_013300105.1	GUT_GENOME013826	97.9817	783	1006	0.77833
GCF_013300105.1	GUT_GENOME271730	97.9604	779	1006	0.774354
GCF_013300105.1	GUT_GENOME266536	97.957	772	1006	0.767396
GCF_013300105.1	GUT_GENOME269050	97.9551	764	1006	0.759443
GCF_013300105.1	GUT_GENOME114128	97.9474	800	1006	0.795229
GCF_013300105.1	GUT_GENOME266306	97.9338	761	1006	0.756461
GCF_013300105.1	GUT_GENOME191475	97.9321	702	1006	0.697813
GCF_013300105.1	GUT_GENOME267551	97.9318	787	1006	0.782306
GCF_013300105.1	GUT_GENOME074494	97.9293	748	1006	0.743539
GCF_013300105.1	GUT_GENOME012444	97.9228	755	1006	0.750497
GCF_013300105.1	GUT_GENOME099820	97.9153	785	1006	0.780318
GCF_013300105.1	GUT_GENOME270400	97.9109	751	1006	0.746521
GCF_013300105.1	GUT_GENOME272085	97.9056	767	1006	0.762425
GCF_013300105.1	GUT_GENOME024396	97.9033	775	1006	0.770378
GCF_013300105.1	GUT_GENOME272956	97.899	763	1006	0.758449
GCF_013300105.1	GUT_GENOME193646	97.8918	749	1006	0.744533
GCF_013300105.1	GUT_GENOME221291	97.8918	752	1006	0.747515
GCF_013300105.1	GUT_GENOME106352	97.8875	750	1006	0.745527
GCF_013300105.1	GUT_GENOME028168	97.8869	776	1006	0.771372
GCF_013300105.1	GUT_GENOME264696	97.8835	770	1006	0.765408
GCF_013300105.1	GUT_GENOME062172	97.8835	750	1006	0.745527
GCF_013300105.1	GUT_GENOME253477	97.8821	771	1006	0.766402
GCF_013300105.1	GUT_GENOME022075	97.8788	773	1006	0.76839
GCF_013300105.1	GUT_GENOME139408	97.8783	771	1006	0.766402
GCF_013300105.1	GUT_GENOME271689	97.8769	770	1006	0.765408
GCF_013300105.1	GUT_GENOME019059	97.8767	605	1006	0.601392
GCF_013300105.1	GUT_GENOME252179	97.8766	808	1006	0.803181
GCF_013300105.1	GUT_GENOME269460	97.8764	767	1006	0.762425
GCF_013300105.1	GUT_GENOME089551	97.8732	767	1006	0.762425
GCF_013300105.1	GUT_GENOME009417	97.8724	770	1006	0.765408
GCF_013300105.1	GUT_GENOME101902	97.8719	785	1006	0.780318
GCF_013300105.1	GUT_GENOME255327	97.8716	767	1006	0.762425
GCF_013300105.1	GUT_GENOME275522	97.8706	766	1006	0.761431
GCF_013300105.1	GUT_GENOME023119	97.8691	777	1006	0.772366
GCF_013300105.1	GUT_GENOME270009	97.8679	797	1006	0.792247
GCF_013300105.1	GUT_GENOME018544	97.8663	765	1006	0.760437
GCF_013300105.1	GUT_GENOME024429	97.8647	782	1006	0.777336
GCF_013300105.1	GUT_GENOME271902	97.8644	758	1006	0.753479
GCF_013300105.1	GUT_GENOME278488	97.8629	770	1006	0.765408
GCF_013300105.1	GUT_GENOME200954	97.8608	781	1006	0.776342
GCF_013300105.1	GUT_GENOME274419	97.8579	772	1006	0.767396
GCF_013300105.1	GUT_GENOME105591	97.8576	755	1006	0.750497
GCF_013300105.1	GUT_GENOME091596	97.8537	783	1006	0.77833
GCF_013300105.1	GUT_GENOME094431	97.8518	784	1006	0.779324
GCF_013300105.1	GUT_GENOME115352	97.8515	778	1006	0.77336
GCF_013300105.1	GUT_GENOME023235	97.8507	785	1006	0.780318
GCF_013300105.1	GUT_GENOME078454	97.8477	755	1006	0.750497
GCF_013300105.1	GUT_GENOME279528	97.8429	786	1006	0.781312
GCF_013300105.1	GUT_GENOME104503	97.8418	777	1006	0.772366
GCF_013300105.1	GUT_GENOME130917	97.8411	753	1006	0.748509
GCF_013300105.1	GUT_GENOME275426	97.8399	738	1006	0.733598
GCF_013300105.1	GUT_GENOME026191	97.8365	784	1006	0.779324
GCF_013300105.1	GUT_GENOME274311	97.8357	796	1006	0.791252
GCF_013300105.1	GUT_GENOME004824	97.8344	789	1006	0.784294
GCF_013300105.1	GUT_GENOME281721	97.8328	780	1006	0.775348
GCF_013300105.1	GUT_GENOME161038	97.8322	768	1006	0.763419
GCF_013300105.1	GUT_GENOME286469	97.8308	769	1006	0.764414
GCF_013300105.1	GUT_GENOME133109	97.8305	768	1006	0.763419
GCF_013300105.1	GUT_GENOME271933	97.8305	780	1006	0.775348
GCF_013300105.1	GUT_GENOME114423	97.83	767	1006	0.762425
GCF_013300105.1	GUT_GENOME022396	97.8275	783	1006	0.77833
GCF_013300105.1	GUT_GENOME280403	97.827	769	1006	0.764414
GCF_013300105.1	GUT_GENOME134342	97.8252	767	1006	0.762425
GCF_013300105.1	GUT_GENOME265623	97.8241	736	1006	0.73161
GCF_013300105.1	GUT_GENOME282714	97.8216	773	1006	0.76839
GCF_013300105.1	GUT_GENOME281759	97.8214	778	1006	0.77336
GCF_013300105.1	GUT_GENOME135134	97.8213	760	1006	0.755467
GCF_013300105.1	GUT_GENOME108140	97.8208	756	1006	0.751491
GCF_013300105.1	GUT_GENOME280127	97.8205	776	1006	0.771372
GCF_013300105.1	GUT_GENOME160427	97.8203	736	1006	0.73161
GCF_013300105.1	GUT_GENOME284841	97.8198	796	1006	0.791252
GCF_013300105.1	GUT_GENOME161151	97.8172	753	1006	0.748509
GCF_013300105.1	GUT_GENOME252725	97.8155	794	1006	0.789264
GCF_013300105.1	GUT_GENOME281974	97.8094	808	1006	0.803181
GCF_013300105.1	GUT_GENOME000859	97.8082	805	1006	0.800199
GCF_013300105.1	GUT_GENOME266093	97.8072	791	1006	0.786282
GCF_013300105.1	GUT_GENOME022334	97.8071	776	1006	0.771372
GCF_013300105.1	GUT_GENOME273976	97.8055	786	1006	0.781312
GCF_013300105.1	GUT_GENOME269124	97.8054	741	1006	0.736581
GCF_013300105.1	GUT_GENOME106042	97.8052	763	1006	0.758449
GCF_013300105.1	GUT_GENOME023631	97.8043	785	1006	0.780318
GCF_013300105.1	GUT_GENOME134726	97.801	745	1006	0.740557
GCF_013300105.1	GUT_GENOME117216	97.7942	773	1006	0.76839
GCF_013300105.1	GUT_GENOME251252	97.7938	788	1006	0.7833
GCF_013300105.1	GUT_GENOME256764	97.7885	754	1006	0.749503
GCF_013300105.1	GUT_GENOME251181	97.7885	782	1006	0.777336
GCF_013300105.1	GUT_GENOME059084	97.7884	773	1006	0.76839
GCF_013300105.1	GUT_GENOME279568	97.7873	673	1006	0.668986
GCF_013300105.1	GUT_GENOME251674	97.7853	785	1006	0.780318
GCF_013300105.1	GUT_GENOME106216	97.7851	773	1006	0.76839
GCF_013300105.1	GUT_GENOME024754	97.7832	769	1006	0.764414
GCF_013300105.1	GUT_GENOME074442	97.7827	781	1006	0.776342
GCF_013300105.1	GUT_GENOME093489	97.7807	784	1006	0.779324
GCF_013300105.1	GUT_GENOME213139	97.7725	760	1006	0.755467
GCF_013300105.1	GUT_GENOME270072	97.7722	774	1006	0.769384
GCF_013300105.1	GUT_GENOME007468	97.771	782	1006	0.777336
GCF_013300105.1	GUT_GENOME137505	97.7696	787	1006	0.782306
GCF_013300105.1	GUT_GENOME285246	97.769	781	1006	0.776342
GCF_013300105.1	GUT_GENOME272685	97.7663	790	1006	0.785288
GCF_013300105.1	GUT_GENOME175569	97.7642	791	1006	0.786282
GCF_013300105.1	GUT_GENOME134129	97.7637	774	1006	0.769384
GCF_013300105.1	GUT_GENOME193078	97.7635	763	1006	0.758449
GCF_013300105.1	GUT_GENOME265862	97.7623	761	1006	0.756461
GCF_013300105.1	GUT_GENOME273399	97.7611	789	1006	0.784294
GCF_013300105.1	GUT_GENOME196065	97.7595	767	1006	0.762425
GCF_013300105.1	GUT_GENOME110442	97.7593	771	1006	0.766402
GCF_013300105.1	GUT_GENOME208494	97.7571	646	1006	0.642147
GCF_013300105.1	GUT_GENOME004978	97.7411	738	1006	0.733598
GCF_013300105.1	GUT_GENOME134311	97.7402	750	1006	0.745527
GCF_013300105.1	GUT_GENOME138108	97.7395	763	1006	0.758449
GCF_013300105.1	GUT_GENOME011068	97.7347	793	1006	0.78827
GCF_013300105.1	GUT_GENOME282833	97.7345	749	1006	0.744533
GCF_013300105.1	GUT_GENOME118048	97.7325	772	1006	0.767396
GCF_013300105.1	GUT_GENOME093880	97.7293	786	1006	0.781312
GCF_013300105.1	GUT_GENOME105403	97.7277	774	1006	0.769384
GCF_013300105.1	GUT_GENOME068317	97.7264	773	1006	0.76839
GCF_013300105.1	GUT_GENOME282957	97.7248	802	1006	0.797217
GCF_013300105.1	GUT_GENOME122238	97.7196	785	1006	0.780318
GCF_013300105.1	GUT_GENOME163738	97.7184	684	1006	0.67992
GCF_013300105.1	GUT_GENOME105492	97.7137	748	1006	0.743539
GCF_013300105.1	GUT_GENOME253004	97.6987	802	1006	0.797217
GCF_013300105.1	GUT_GENOME216494	97.6963	771	1006	0.766402
[truncated: 493,305+ more rows]
