# Supplementary material for: Circulating Levels of the Short-Chain Fatty Acid Acetate Mediate the Effect of the Gut Microbiome on Visceral Fat
Source: Front Microbiol. 2021 Jul 15;12:711359. doi: 10.3389/fmicb.2021.711359 (PMC8320334; doi:10.3389/fmicb.2021.711359)
Supplement: Supplementary file 4 [file Table_4.XLSX]

## Sheet: Coprococcus_Part2
Query	Reference	ANI	Count_bidirectional_fragment_mappings	Total_query_fragments	Alignment_fraction
GUT_GENOME199213	GUT_GENOME070705	98.4327	629	814	0.772727
GUT_GENOME199213	GUT_GENOME082868	98.3402	686	814	0.842752
GUT_GENOME199213	GUT_GENOME004475	98.318	638	814	0.783784
GUT_GENOME199213	GUT_GENOME228470	98.2598	726	814	0.891892
GUT_GENOME199213	GUT_GENOME148080	98.2462	749	814	0.920147
GUT_GENOME199213	GUT_GENOME250382	98.1774	713	814	0.875921
GUT_GENOME199213	GUT_GENOME234468	97.8667	700	814	0.859951
GUT_GENOME199213	GUT_GENOME000977	97.8468	757	814	0.929975
GUT_GENOME199213	GUT_GENOME017328	97.7645	703	814	0.863636
GUT_GENOME199213	GUT_GENOME266759	89.0496	601	814	0.738329
GUT_GENOME199213	GUT_GENOME023277	89.0201	559	814	0.686732
GUT_GENOME199213	GUT_GENOME252536	88.9529	585	814	0.718673
GUT_GENOME199213	GUT_GENOME039234	88.8274	577	814	0.708845
GUT_GENOME199213	GUT_GENOME269593	88.802	585	814	0.718673
GUT_GENOME199213	GUT_GENOME272961	88.7929	596	814	0.732187
GUT_GENOME199213	GUT_GENOME011904	88.7656	548	814	0.673219
GUT_GENOME199213	GUT_GENOME070238	87.6929	546	814	0.670762
GUT_GENOME199213	GUT_GENOME116467	87.6315	579	814	0.711302
GUT_GENOME031660	GUT_GENOME154601	99.4057	757	817	0.926561
GUT_GENOME031660	GUT_GENOME034785	99.0867	678	817	0.829865
GUT_GENOME031660	GUT_GENOME151433	98.8071	747	817	0.914321
GUT_GENOME031660	GUT_GENOME034920	98.7009	709	817	0.867809
GUT_GENOME031660	GUT_GENOME000911	98.6573	764	817	0.935129
GUT_GENOME031660	GUT_GENOME113260	98.6553	747	817	0.914321
GUT_GENOME031660	GUT_GENOME001864	98.6275	760	817	0.930233
GUT_GENOME031660	GUT_GENOME152168	98.5897	765	817	0.936353
GUT_GENOME031660	GUT_GENOME104328	98.5171	718	817	0.878825
GUT_GENOME031660	GUT_GENOME081229	98.3516	727	817	0.889841
GUT_GENOME031660	GUT_GENOME135134	98.05	705	817	0.862913
GUT_GENOME031660	GUT_GENOME114128	97.9509	752	817	0.920441
GUT_GENOME031660	GUT_GENOME023119	97.9374	738	817	0.903305
GUT_GENOME031660	GUT_GENOME007468	97.934	736	817	0.900857
GUT_GENOME031660	GUT_GENOME134342	97.9134	732	817	0.895961
GUT_GENOME031660	GUT_GENOME216494	97.8383	707	817	0.865361
GUT_GENOME031660	GUT_GENOME255327	97.8027	727	817	0.889841
GUT_GENOME031660	GUT_GENOME052950	97.7952	697	817	0.853121
GUT_GENOME031660	GUT_GENOME016657	94.3055	634	817	0.77601
GUT_GENOME031660	GUT_GENOME178562	94.2504	642	817	0.785802
GUT_GENOME031660	GUT_GENOME209369	94.2146	666	817	0.815177
GUT_GENOME031660	GUT_GENOME117486	94.0915	677	817	0.828641
GUT_GENOME031660	GUT_GENOME116561	94.0754	672	817	0.822521
GUT_GENOME031660	GUT_GENOME007205	94.0714	655	817	0.801714
GUT_GENOME195922	GUT_GENOME114896	99.1985	698	729	0.957476
GUT_GENOME195922	GUT_GENOME022435	99.0123	665	729	0.912209
GUT_GENOME195922	GUT_GENOME284371	98.882	701	729	0.961591
GUT_GENOME195922	GUT_GENOME000172	98.8641	713	729	0.978052
GUT_GENOME195922	GUT_GENOME197978	98.8417	662	729	0.908093
GUT_GENOME195922	GUT_GENOME194478	98.8312	665	729	0.912209
GUT_GENOME195922	GUT_GENOME283661	98.8277	674	729	0.924554
GUT_GENOME195922	GUT_GENOME256352	98.8223	684	729	0.938272
GUT_GENOME195922	GUT_GENOME259926	98.8103	708	729	0.971193
GUT_GENOME195922	GUT_GENOME261056	98.7771	704	729	0.965706
GUT_GENOME195922	GUT_GENOME203567	98.7751	685	729	0.939643
GUT_GENOME195922	GUT_GENOME077038	98.7742	658	729	0.902606
GUT_GENOME195922	GUT_GENOME004204	98.7708	691	729	0.947874
GUT_GENOME195922	GUT_GENOME237017	98.7662	702	729	0.962963
GUT_GENOME195922	GUT_GENOME268679	98.7655	641	729	0.879287
GUT_GENOME195922	GUT_GENOME100934	98.7507	690	729	0.946502
GUT_GENOME195922	GUT_GENOME255937	98.7503	696	729	0.954733
GUT_GENOME195922	GUT_GENOME059925	98.7432	694	729	0.951989
GUT_GENOME195922	GUT_GENOME079065	98.7013	653	729	0.895748
GUT_GENOME195922	GUT_GENOME245153	98.6759	683	729	0.9369
GUT_GENOME195922	GUT_GENOME040647	98.6725	673	729	0.923182
GUT_GENOME195922	GUT_GENOME070705	98.664	592	729	0.812071
GUT_GENOME195922	GUT_GENOME280050	98.6638	687	729	0.942387
GUT_GENOME195922	GUT_GENOME112073	98.66	680	729	0.932785
GUT_GENOME195922	GUT_GENOME024044	98.6554	699	729	0.958848
GUT_GENOME195922	GUT_GENOME025391	98.6499	699	729	0.958848
GUT_GENOME195922	GUT_GENOME020289	98.6316	676	729	0.927298
GUT_GENOME195922	GUT_GENOME272604	98.6256	661	729	0.906722
GUT_GENOME195922	GUT_GENOME008526	98.6038	645	729	0.884774
GUT_GENOME195922	GUT_GENOME056667	98.6002	664	729	0.910837
GUT_GENOME195922	GUT_GENOME164892	98.5832	643	729	0.88203
GUT_GENOME195922	GUT_GENOME044157	98.5648	650	729	0.891632
GUT_GENOME195922	GUT_GENOME004475	98.5385	593	729	0.813443
GUT_GENOME195922	GUT_GENOME082868	98.3963	649	729	0.890261
GUT_GENOME195922	GUT_GENOME199294	98.3395	679	729	0.931413
GUT_GENOME195922	GUT_GENOME148080	98.2723	688	729	0.943759
GUT_GENOME195922	GUT_GENOME228470	98.1718	679	729	0.931413
GUT_GENOME195922	GUT_GENOME250382	98.0958	666	729	0.91358
GUT_GENOME195922	GUT_GENOME017328	97.8708	662	729	0.908093
GUT_GENOME195922	GUT_GENOME000977	97.8681	689	729	0.94513
GUT_GENOME195922	GUT_GENOME234468	97.8378	645	729	0.884774
GUT_GENOME195922	GUT_GENOME039234	88.6558	544	729	0.746228
GUT_GENOME195922	GUT_GENOME266759	88.6083	565	729	0.775034
GUT_GENOME195922	GUT_GENOME272961	88.6073	573	729	0.786008
GUT_GENOME195922	GUT_GENOME269593	88.5521	564	729	0.773663
GUT_GENOME195922	GUT_GENOME011904	88.5376	538	729	0.737997
GUT_GENOME195922	GUT_GENOME252536	88.5301	572	729	0.784636
GUT_GENOME195922	GUT_GENOME023277	88.4627	552	729	0.757202
GUT_GENOME195922	GUT_GENOME070238	87.8203	498	729	0.683128
GUT_GENOME195922	GUT_GENOME116467	87.8155	527	729	0.722908
GUT_GENOME001292	GUT_GENOME204062	97.701	778	1107	0.7028
GUT_GENOME119387	GUT_GENOME252536	99.354	884	945	0.93545
GUT_GENOME119387	GUT_GENOME269593	99.2953	869	945	0.919577
GUT_GENOME119387	GUT_GENOME266759	98.7747	864	945	0.914286
GUT_GENOME119387	GUT_GENOME023277	98.7661	823	945	0.870899
GUT_GENOME119387	GUT_GENOME272961	98.705	872	945	0.922751
GUT_GENOME119387	GUT_GENOME011904	98.6361	770	945	0.814815
GUT_GENOME119387	GUT_GENOME039234	98.6285	818	945	0.865608
GUT_GENOME119387	GUT_GENOME025391	89.1555	680	945	0.719577
GUT_GENOME119387	GUT_GENOME059925	89.1482	653	945	0.691005
GUT_GENOME119387	GUT_GENOME000172	89.1425	690	945	0.730159
GUT_GENOME119387	GUT_GENOME044157	89.1201	602	945	0.637037
GUT_GENOME119387	GUT_GENOME259926	89.1084	685	945	0.724868
GUT_GENOME119387	GUT_GENOME272604	89.0995	632	945	0.668783
GUT_GENOME119387	GUT_GENOME283661	89.0506	645	945	0.68254
GUT_GENOME119387	GUT_GENOME100934	89.0272	670	945	0.708995
GUT_GENOME119387	GUT_GENOME004204	89.027	651	945	0.688889
GUT_GENOME119387	GUT_GENOME114896	89.0204	667	945	0.70582
GUT_GENOME119387	GUT_GENOME203567	89.0096	642	945	0.679365
GUT_GENOME119387	GUT_GENOME197978	88.9778	631	945	0.667725
GUT_GENOME119387	GUT_GENOME245153	88.9755	658	945	0.696296
GUT_GENOME119387	GUT_GENOME040647	88.9685	637	945	0.674074
GUT_GENOME119387	GUT_GENOME237017	88.9655	668	945	0.706878
GUT_GENOME119387	GUT_GENOME228470	88.9303	648	945	0.685714
GUT_GENOME119387	GUT_GENOME199294	88.9179	648	945	0.685714
GUT_GENOME119387	GUT_GENOME024044	88.9092	677	945	0.716402
GUT_GENOME119387	GUT_GENOME056667	88.8944	627	945	0.663492
GUT_GENOME119387	GUT_GENOME255937	88.8842	679	945	0.718519
GUT_GENOME119387	GUT_GENOME082868	88.8707	617	945	0.65291
GUT_GENOME119387	GUT_GENOME280050	88.868	657	945	0.695238
GUT_GENOME119387	GUT_GENOME112073	88.8513	658	945	0.696296
GUT_GENOME119387	GUT_GENOME077038	88.8507	635	945	0.671958
GUT_GENOME119387	GUT_GENOME070705	88.8343	557	945	0.589418
GUT_GENOME119387	GUT_GENOME256352	88.8333	679	945	0.718519
GUT_GENOME119387	GUT_GENOME022435	88.8302	611	945	0.646561
GUT_GENOME119387	GUT_GENOME148080	88.8196	675	945	0.714286
GUT_GENOME119387	GUT_GENOME284371	88.8131	674	945	0.713228
GUT_GENOME119387	GUT_GENOME261056	88.8055	673	945	0.712169
GUT_GENOME119387	GUT_GENOME008526	88.7987	604	945	0.639153
GUT_GENOME119387	GUT_GENOME268679	88.7894	610	945	0.645503
GUT_GENOME119387	GUT_GENOME164892	88.7632	599	945	0.633862
GUT_GENOME119387	GUT_GENOME000977	88.7434	683	945	0.722751
GUT_GENOME119387	GUT_GENOME020289	88.7351	674	945	0.713228
GUT_GENOME119387	GUT_GENOME234468	88.7105	631	945	0.667725
GUT_GENOME119387	GUT_GENOME194478	88.68	639	945	0.67619
GUT_GENOME119387	GUT_GENOME250382	88.6223	648	945	0.685714
GUT_GENOME119387	GUT_GENOME017328	88.5036	627	945	0.663492
GUT_GENOME119387	GUT_GENOME079065	88.4671	618	945	0.653968
GUT_GENOME119387	GUT_GENOME004475	88.41	565	945	0.597884
GUT_GENOME119387	GUT_GENOME070238	88.0269	588	945	0.622222
GUT_GENOME119387	GUT_GENOME116467	87.9323	627	945	0.663492
GUT_GENOME236933	GUT_GENOME237017	99.9884	938	950	0.987368
GUT_GENOME236933	GUT_GENOME194478	98.8283	805	950	0.847368
GUT_GENOME236933	GUT_GENOME077038	98.797	805	950	0.847368
GUT_GENOME236933	GUT_GENOME256352	98.7827	836	950	0.88
GUT_GENOME236933	GUT_GENOME004204	98.7601	836	950	0.88
GUT_GENOME236933	GUT_GENOME197978	98.7546	799	950	0.841053
GUT_GENOME236933	GUT_GENOME283661	98.7519	827	950	0.870526
GUT_GENOME236933	GUT_GENOME079065	98.7493	798	950	0.84
GUT_GENOME236933	GUT_GENOME259926	98.7364	876	950	0.922105
GUT_GENOME236933	GUT_GENOME020289	98.733	811	950	0.853684
GUT_GENOME236933	GUT_GENOME114896	98.7254	861	950	0.906316
GUT_GENOME236933	GUT_GENOME112073	98.725	832	950	0.875789
GUT_GENOME236933	GUT_GENOME056667	98.7197	787	950	0.828421
GUT_GENOME236933	GUT_GENOME000172	98.7193	875	950	0.921053
GUT_GENOME236933	GUT_GENOME255937	98.7164	855	950	0.9
GUT_GENOME236933	GUT_GENOME272604	98.7141	796	950	0.837895
GUT_GENOME236933	GUT_GENOME284371	98.7128	840	950	0.884211
GUT_GENOME236933	GUT_GENOME203567	98.7117	837	950	0.881053
GUT_GENOME236933	GUT_GENOME268679	98.688	760	950	0.8
GUT_GENOME236933	GUT_GENOME245153	98.6872	841	950	0.885263
GUT_GENOME236933	GUT_GENOME059925	98.6732	842	950	0.886316
GUT_GENOME236933	GUT_GENOME025391	98.6726	864	950	0.909474
GUT_GENOME236933	GUT_GENOME100934	98.6634	830	950	0.873684
GUT_GENOME236933	GUT_GENOME022435	98.638	778	950	0.818947
GUT_GENOME236933	GUT_GENOME280050	98.61	852	950	0.896842
GUT_GENOME236933	GUT_GENOME261056	98.6078	845	950	0.889474
GUT_GENOME236933	GUT_GENOME040647	98.5914	817	950	0.86
GUT_GENOME236933	GUT_GENOME024044	98.5793	851	950	0.895789
GUT_GENOME236933	GUT_GENOME044157	98.5631	757	950	0.796842
GUT_GENOME236933	GUT_GENOME164892	98.5351	757	950	0.796842
GUT_GENOME236933	GUT_GENOME008526	98.4957	772	950	0.812632
GUT_GENOME236933	GUT_GENOME082868	98.4559	782	950	0.823158
GUT_GENOME236933	GUT_GENOME070705	98.4535	692	950	0.728421
GUT_GENOME236933	GUT_GENOME004475	98.4458	688	950	0.724211
GUT_GENOME236933	GUT_GENOME148080	98.277	843	950	0.887368
GUT_GENOME236933	GUT_GENOME199294	98.2176	816	950	0.858947
GUT_GENOME236933	GUT_GENOME250382	98.1931	803	950	0.845263
GUT_GENOME236933	GUT_GENOME228470	98.1156	824	950	0.867368
GUT_GENOME236933	GUT_GENOME000977	97.7835	847	950	0.891579
GUT_GENOME236933	GUT_GENOME017328	97.7816	795	950	0.836842
GUT_GENOME236933	GUT_GENOME234468	97.7559	796	950	0.837895
GUT_GENOME236933	GUT_GENOME266759	89.1795	691	950	0.727368
GUT_GENOME236933	GUT_GENOME252536	88.9708	683	950	0.718947
GUT_GENOME236933	GUT_GENOME272961	88.9307	679	950	0.714737
GUT_GENOME236933	GUT_GENOME039234	88.909	653	950	0.687368
GUT_GENOME236933	GUT_GENOME269593	88.8553	675	950	0.710526
GUT_GENOME236933	GUT_GENOME023277	88.8544	651	950	0.685263
GUT_GENOME236933	GUT_GENOME011904	88.8483	614	950	0.646316
GUT_GENOME236933	GUT_GENOME070238	87.9704	587	950	0.617895
GUT_GENOME236933	GUT_GENOME116467	87.8866	636	950	0.669474
GUT_GENOME254434	GUT_GENOME023119	98.8092	779	884	0.881222
GUT_GENOME254434	GUT_GENOME134342	98.7994	780	884	0.882353
GUT_GENOME254434	GUT_GENOME135134	98.7726	776	884	0.877828
GUT_GENOME254434	GUT_GENOME007468	98.7648	773	884	0.874434
GUT_GENOME254434	GUT_GENOME052950	98.6611	728	884	0.823529
GUT_GENOME254434	GUT_GENOME114128	98.6011	791	884	0.894796
GUT_GENOME254434	GUT_GENOME255327	98.4383	766	884	0.866516
GUT_GENOME254434	GUT_GENOME216494	98.4343	770	884	0.871041
GUT_GENOME254434	GUT_GENOME081229	98.3316	753	884	0.85181
GUT_GENOME254434	GUT_GENOME104328	98.0748	738	884	0.834842
GUT_GENOME254434	GUT_GENOME034785	98.0525	679	884	0.7681
GUT_GENOME254434	GUT_GENOME034920	97.9301	732	884	0.828054
GUT_GENOME254434	GUT_GENOME001864	97.8941	776	884	0.877828
GUT_GENOME254434	GUT_GENOME154601	97.8907	777	884	0.878959
GUT_GENOME254434	GUT_GENOME152168	97.8664	776	884	0.877828
GUT_GENOME254434	GUT_GENOME151433	97.8575	765	884	0.865385
GUT_GENOME254434	GUT_GENOME000911	97.8122	784	884	0.886878
GUT_GENOME254434	GUT_GENOME113260	97.7992	778	884	0.88009
GUT_GENOME254434	GUT_GENOME209369	94.5707	683	884	0.772624
GUT_GENOME254434	GUT_GENOME016657	94.5666	642	884	0.726244
GUT_GENOME254434	GUT_GENOME117486	94.4951	699	884	0.790724
GUT_GENOME254434	GUT_GENOME116561	94.4621	694	884	0.785068
GUT_GENOME254434	GUT_GENOME007205	94.3803	673	884	0.761312
GUT_GENOME254434	GUT_GENOME178562	94.2859	662	884	0.748869
GUT_GENOME130060	GUT_GENOME267997	97.6163	614	909	0.675468
GUT_GENOME091443	GUT_GENOME056667	99.1435	765	883	0.866365
GUT_GENOME091443	GUT_GENOME077038	98.9164	780	883	0.883352
GUT_GENOME091443	GUT_GENOME237017	98.8568	822	883	0.930917
GUT_GENOME091443	GUT_GENOME256352	98.8391	810	883	0.917327
GUT_GENOME091443	GUT_GENOME040647	98.8389	779	883	0.88222
GUT_GENOME091443	GUT_GENOME259926	98.8279	831	883	0.94111
GUT_GENOME091443	GUT_GENOME112073	98.8267	799	883	0.90487
GUT_GENOME091443	GUT_GENOME255937	98.8206	811	883	0.91846
GUT_GENOME091443	GUT_GENOME004204	98.8129	798	883	0.903737
GUT_GENOME091443	GUT_GENOME114896	98.7895	809	883	0.916195
GUT_GENOME091443	GUT_GENOME020289	98.7885	782	883	0.885617
GUT_GENOME091443	GUT_GENOME059925	98.7878	811	883	0.91846
GUT_GENOME091443	GUT_GENOME261056	98.7838	824	883	0.933182
GUT_GENOME091443	GUT_GENOME079065	98.7829	762	883	0.862967
GUT_GENOME091443	GUT_GENOME197978	98.7785	774	883	0.876557
GUT_GENOME091443	GUT_GENOME284371	98.7626	800	883	0.906002
GUT_GENOME091443	GUT_GENOME194478	98.7621	774	883	0.876557
GUT_GENOME091443	GUT_GENOME000172	98.7593	840	883	0.951302
GUT_GENOME091443	GUT_GENOME268679	98.7536	723	883	0.8188
GUT_GENOME091443	GUT_GENOME025391	98.7449	820	883	0.928652
GUT_GENOME091443	GUT_GENOME022435	98.7419	734	883	0.831257
GUT_GENOME091443	GUT_GENOME203567	98.7407	796	883	0.901472
GUT_GENOME091443	GUT_GENOME100934	98.737	798	883	0.903737
GUT_GENOME091443	GUT_GENOME245153	98.7184	801	883	0.907135
GUT_GENOME091443	GUT_GENOME272604	98.7111	757	883	0.857305
GUT_GENOME091443	GUT_GENOME024044	98.6958	810	883	0.917327
GUT_GENOME091443	GUT_GENOME283661	98.6922	786	883	0.890147
GUT_GENOME091443	GUT_GENOME280050	98.6775	799	883	0.90487
GUT_GENOME091443	GUT_GENOME004475	98.6753	662	883	0.749717
GUT_GENOME091443	GUT_GENOME070705	98.6722	678	883	0.767837
GUT_GENOME091443	GUT_GENOME164892	98.6515	711	883	0.80521
GUT_GENOME091443	GUT_GENOME044157	98.5806	723	883	0.8188
GUT_GENOME091443	GUT_GENOME008526	98.5235	730	883	0.826727
GUT_GENOME091443	GUT_GENOME082868	98.4902	742	883	0.840317
GUT_GENOME091443	GUT_GENOME199294	98.4025	781	883	0.884485
GUT_GENOME091443	GUT_GENOME228470	98.3368	772	883	0.874292
GUT_GENOME091443	GUT_GENOME148080	98.3272	795	883	0.90034
GUT_GENOME091443	GUT_GENOME250382	98.2135	764	883	0.865232
GUT_GENOME091443	GUT_GENOME000977	97.9351	797	883	0.902605
GUT_GENOME091443	GUT_GENOME234468	97.9344	748	883	0.847112
GUT_GENOME091443	GUT_GENOME017328	97.8914	757	883	0.857305
GUT_GENOME091443	GUT_GENOME266759	88.7248	635	883	0.719139
GUT_GENOME091443	GUT_GENOME272961	88.7237	656	883	0.742922
GUT_GENOME091443	GUT_GENOME252536	88.6647	642	883	0.727067
GUT_GENOME091443	GUT_GENOME039234	88.637	609	883	0.689694
GUT_GENOME091443	GUT_GENOME011904	88.606	601	883	0.680634
GUT_GENOME091443	GUT_GENOME023277	88.5869	621	883	0.703284
GUT_GENOME091443	GUT_GENOME269593	88.4266	645	883	0.730464
GUT_GENOME091443	GUT_GENOME070238	87.7544	565	883	0.639864
GUT_GENOME091443	GUT_GENOME116467	87.6544	612	883	0.693092
GUT_GENOME219605	GUT_GENOME113260	98.6904	776	855	0.907602
GUT_GENOME219605	GUT_GENOME151433	98.6652	780	855	0.912281
GUT_GENOME219605	GUT_GENOME154601	98.5816	769	855	0.899415
GUT_GENOME219605	GUT_GENOME152168	98.5749	789	855	0.922807
GUT_GENOME219605	GUT_GENOME000911	98.5479	787	855	0.920468
GUT_GENOME219605	GUT_GENOME034920	98.547	723	855	0.845614
GUT_GENOME219605	GUT_GENOME001864	98.5076	787	855	0.920468
GUT_GENOME219605	GUT_GENOME104328	98.4806	740	855	0.865497
GUT_GENOME219605	GUT_GENOME034785	98.4012	679	855	0.794152
GUT_GENOME219605	GUT_GENOME081229	98.1397	755	855	0.883041
GUT_GENOME219605	GUT_GENOME135134	98.0059	727	855	0.850292
GUT_GENOME219605	GUT_GENOME023119	97.9724	755	855	0.883041
GUT_GENOME219605	GUT_GENOME052950	97.9162	703	855	0.822222
GUT_GENOME219605	GUT_GENOME007468	97.8895	762	855	0.891228
GUT_GENOME219605	GUT_GENOME114128	97.8756	769	855	0.899415
GUT_GENOME219605	GUT_GENOME255327	97.8554	742	855	0.867836
GUT_GENOME219605	GUT_GENOME134342	97.8531	754	855	0.881871
GUT_GENOME219605	GUT_GENOME216494	97.8071	746	855	0.872515
GUT_GENOME219605	GUT_GENOME209369	94.0193	690	855	0.807018
GUT_GENOME219605	GUT_GENOME178562	94.0154	664	855	0.776608
GUT_GENOME219605	GUT_GENOME016657	94.0068	648	855	0.757895
GUT_GENOME219605	GUT_GENOME117486	93.9616	699	855	0.817544
GUT_GENOME219605	GUT_GENOME116561	93.9054	686	855	0.802339
GUT_GENOME219605	GUT_GENOME007205	93.8457	681	855	0.796491
GUT_GENOME229271	GUT_GENOME148080	99.9757	867	887	0.977452
GUT_GENOME229271	GUT_GENOME250382	98.9387	806	887	0.908681
GUT_GENOME229271	GUT_GENOME228470	98.9235	817	887	0.921082
GUT_GENOME229271	GUT_GENOME082868	98.7819	762	887	0.859076
GUT_GENOME229271	GUT_GENOME000977	98.4537	828	887	0.933484
GUT_GENOME229271	GUT_GENOME194478	98.3993	778	887	0.877114
GUT_GENOME229271	GUT_GENOME004204	98.3902	801	887	0.903044
GUT_GENOME229271	GUT_GENOME284371	98.3782	808	887	0.910936
GUT_GENOME229271	GUT_GENOME017328	98.3751	766	887	0.863585
GUT_GENOME229271	GUT_GENOME234468	98.3534	767	887	0.864713
GUT_GENOME229271	GUT_GENOME022435	98.3413	742	887	0.836528
GUT_GENOME229271	GUT_GENOME114896	98.338	808	887	0.910936
GUT_GENOME229271	GUT_GENOME025391	98.3371	813	887	0.916573
GUT_GENOME229271	GUT_GENOME237017	98.3267	828	887	0.933484
GUT_GENOME229271	GUT_GENOME079065	98.3243	778	887	0.877114
GUT_GENOME229271	GUT_GENOME040647	98.3202	775	887	0.873732
GUT_GENOME229271	GUT_GENOME024044	98.3032	814	887	0.9177
GUT_GENOME229271	GUT_GENOME100934	98.2995	803	887	0.905299
GUT_GENOME229271	GUT_GENOME077038	98.2984	774	887	0.872604
GUT_GENOME229271	GUT_GENOME255937	98.2951	809	887	0.912063
GUT_GENOME229271	GUT_GENOME261056	98.2935	817	887	0.921082
GUT_GENOME229271	GUT_GENOME268679	98.2871	727	887	0.819617
GUT_GENOME229271	GUT_GENOME197978	98.2854	775	887	0.873732
GUT_GENOME229271	GUT_GENOME112073	98.2754	794	887	0.895152
GUT_GENOME229271	GUT_GENOME203567	98.2719	809	887	0.912063
GUT_GENOME229271	GUT_GENOME059925	98.2661	810	887	0.913191
GUT_GENOME229271	GUT_GENOME280050	98.2604	799	887	0.900789
GUT_GENOME229271	GUT_GENOME283661	98.2501	789	887	0.889515
GUT_GENOME229271	GUT_GENOME272604	98.2318	771	887	0.869222
GUT_GENOME229271	GUT_GENOME020289	98.2221	792	887	0.892897
GUT_GENOME229271	GUT_GENOME259926	98.2194	834	887	0.940248
GUT_GENOME229271	GUT_GENOME256352	98.2169	799	887	0.900789
GUT_GENOME229271	GUT_GENOME000172	98.2128	841	887	0.94814
GUT_GENOME229271	GUT_GENOME164892	98.205	721	887	0.812852
GUT_GENOME229271	GUT_GENOME056667	98.2042	759	887	0.855693
GUT_GENOME229271	GUT_GENOME008526	98.2039	726	887	0.818489
GUT_GENOME229271	GUT_GENOME245153	98.1806	796	887	0.897407
GUT_GENOME229271	GUT_GENOME004475	98.1678	664	887	0.748591
GUT_GENOME229271	GUT_GENOME070705	98.0662	670	887	0.755355
GUT_GENOME229271	GUT_GENOME044157	98.0501	727	887	0.819617
GUT_GENOME229271	GUT_GENOME199294	98.0212	784	887	0.883878
GUT_GENOME229271	GUT_GENOME252536	88.831	660	887	0.744081
GUT_GENOME229271	GUT_GENOME023277	88.7855	619	887	0.697858
GUT_GENOME229271	GUT_GENOME266759	88.7487	657	887	0.740699
GUT_GENOME229271	GUT_GENOME269593	88.6137	648	887	0.730552
GUT_GENOME229271	GUT_GENOME039234	88.519	630	887	0.710259
GUT_GENOME229271	GUT_GENOME011904	88.4994	604	887	0.680947
GUT_GENOME229271	GUT_GENOME272961	88.4883	663	887	0.747463
GUT_GENOME229271	GUT_GENOME116467	87.7849	616	887	0.694476
GUT_GENOME229271	GUT_GENOME070238	87.736	594	887	0.669673
GUT_GENOME016619	GUT_GENOME034785	99.6216	551	619	0.890145
GUT_GENOME016619	GUT_GENOME154601	99.0674	597	619	0.964459
GUT_GENOME016619	GUT_GENOME151433	98.7417	594	619	0.959612
GUT_GENOME016619	GUT_GENOME000911	98.6775	599	619	0.96769
GUT_GENOME016619	GUT_GENOME034920	98.658	571	619	0.922456
GUT_GENOME016619	GUT_GENOME001864	98.6262	605	619	0.977383
GUT_GENOME016619	GUT_GENOME152168	98.6039	606	619	0.978998
GUT_GENOME016619	GUT_GENOME113260	98.5743	600	619	0.969305
GUT_GENOME016619	GUT_GENOME081229	98.4472	581	619	0.938611
GUT_GENOME016619	GUT_GENOME104328	98.4321	579	619	0.93538
GUT_GENOME016619	GUT_GENOME135134	98.1703	580	619	0.936995
GUT_GENOME016619	GUT_GENOME114128	98.1524	599	619	0.96769
GUT_GENOME016619	GUT_GENOME023119	98.1442	595	619	0.961228
GUT_GENOME016619	GUT_GENOME134342	98.1213	589	619	0.951535
GUT_GENOME016619	GUT_GENOME255327	98.115	579	619	0.93538
GUT_GENOME016619	GUT_GENOME007468	98.0985	590	619	0.95315
GUT_GENOME016619	GUT_GENOME216494	98.0472	569	619	0.919225
GUT_GENOME016619	GUT_GENOME052950	98.0236	565	619	0.912763
GUT_GENOME016619	GUT_GENOME117486	94.296	546	619	0.882068
GUT_GENOME016619	GUT_GENOME209369	94.2658	532	619	0.859451
GUT_GENOME016619	GUT_GENOME007205	94.2434	521	619	0.84168
GUT_GENOME016619	GUT_GENOME016657	94.2233	522	619	0.843296
GUT_GENOME016619	GUT_GENOME178562	94.1726	524	619	0.846527
GUT_GENOME016619	GUT_GENOME116561	94.1488	543	619	0.877221
GUT_GENOME215848	GUT_GENOME194478	98.5917	782	896	0.872768
GUT_GENOME215848	GUT_GENOME100934	98.5422	819	896	0.914062
GUT_GENOME215848	GUT_GENOME024044	98.5175	826	896	0.921875
GUT_GENOME215848	GUT_GENOME255937	98.4974	823	896	0.918527
GUT_GENOME215848	GUT_GENOME237017	98.4935	833	896	0.929688
GUT_GENOME215848	GUT_GENOME077038	98.4927	792	896	0.883929
GUT_GENOME215848	GUT_GENOME112073	98.4925	804	896	0.897321
GUT_GENOME215848	GUT_GENOME022435	98.4877	754	896	0.841518
GUT_GENOME215848	GUT_GENOME272604	98.4786	761	896	0.84933
GUT_GENOME215848	GUT_GENOME114896	98.4635	821	896	0.916295
GUT_GENOME215848	GUT_GENOME284371	98.4589	820	896	0.915179
GUT_GENOME215848	GUT_GENOME056667	98.45	759	896	0.847098
GUT_GENOME215848	GUT_GENOME059925	98.4427	807	896	0.90067
GUT_GENOME215848	GUT_GENOME000172	98.4422	844	896	0.941964
GUT_GENOME215848	GUT_GENOME025391	98.4397	832	896	0.928571
GUT_GENOME215848	GUT_GENOME040647	98.4395	788	896	0.879464
GUT_GENOME215848	GUT_GENOME259926	98.4361	830	896	0.926339
GUT_GENOME215848	GUT_GENOME079065	98.4292	776	896	0.866071
GUT_GENOME215848	GUT_GENOME280050	98.42	813	896	0.907366
GUT_GENOME215848	GUT_GENOME044157	98.4187	725	896	0.809152
GUT_GENOME215848	GUT_GENOME256352	98.4135	811	896	0.905134
GUT_GENOME215848	GUT_GENOME004204	98.4074	808	896	0.901786
GUT_GENOME215848	GUT_GENOME268679	98.3982	727	896	0.811384
GUT_GENOME215848	GUT_GENOME197978	98.3947	781	896	0.871652
GUT_GENOME215848	GUT_GENOME261056	98.3899	830	896	0.926339
GUT_GENOME215848	GUT_GENOME283661	98.3896	791	896	0.882812
GUT_GENOME215848	GUT_GENOME245153	98.3822	806	896	0.899554
GUT_GENOME215848	GUT_GENOME203567	98.3745	798	896	0.890625
GUT_GENOME215848	GUT_GENOME020289	98.3454	800	896	0.892857
GUT_GENOME215848	GUT_GENOME008526	98.3204	739	896	0.824777
GUT_GENOME215848	GUT_GENOME082868	98.307	762	896	0.850446
GUT_GENOME215848	GUT_GENOME199294	98.3006	811	896	0.905134
GUT_GENOME215848	GUT_GENOME164892	98.2252	719	896	0.802455
GUT_GENOME215848	GUT_GENOME004475	98.2139	677	896	0.75558
GUT_GENOME215848	GUT_GENOME070705	98.1843	680	896	0.758929
GUT_GENOME215848	GUT_GENOME250382	98.1141	791	896	0.882812
GUT_GENOME215848	GUT_GENOME148080	98.059	816	896	0.910714
GUT_GENOME215848	GUT_GENOME228470	98.0229	800	896	0.892857
GUT_GENOME215848	GUT_GENOME000977	97.8504	825	896	0.920759
GUT_GENOME215848	GUT_GENOME234468	97.7936	765	896	0.853795
GUT_GENOME215848	GUT_GENOME017328	97.7655	773	896	0.862723
GUT_GENOME215848	GUT_GENOME266759	88.8996	677	896	0.75558
GUT_GENOME215848	GUT_GENOME272961	88.7644	663	896	0.739955
GUT_GENOME215848	GUT_GENOME252536	88.7625	663	896	0.739955
GUT_GENOME215848	GUT_GENOME039234	88.7432	650	896	0.725446
GUT_GENOME215848	GUT_GENOME269593	88.7237	656	896	0.732143
GUT_GENOME215848	GUT_GENOME023277	88.7123	633	896	0.706473
GUT_GENOME215848	GUT_GENOME011904	88.5801	616	896	0.6875
GUT_GENOME215848	GUT_GENOME116467	87.7713	621	896	0.69308
GUT_GENOME215848	GUT_GENOME070238	87.7424	590	896	0.658482
GUT_GENOME092134	GUT_GENOME267997	97.9571	603	806	0.748139
GUT_GENOME041731	GUT_GENOME252536	98.7443	827	920	0.898913
GUT_GENOME041731	GUT_GENOME023277	98.6635	800	920	0.869565
GUT_GENOME041731	GUT_GENOME039234	98.649	808	920	0.878261
GUT_GENOME041731	GUT_GENOME269593	98.6466	816	920	0.886957
GUT_GENOME041731	GUT_GENOME266759	98.5861	824	920	0.895652
GUT_GENOME041731	GUT_GENOME272961	98.5653	816	920	0.886957
GUT_GENOME041731	GUT_GENOME011904	98.3657	750	920	0.815217
GUT_GENOME041731	GUT_GENOME272604	89.0915	606	920	0.658696
GUT_GENOME041731	GUT_GENOME245153	89.016	641	920	0.696739
GUT_GENOME041731	GUT_GENOME056667	89.0141	602	920	0.654348
GUT_GENOME041731	GUT_GENOME059925	88.9993	627	920	0.681522
GUT_GENOME041731	GUT_GENOME000172	88.9965	660	920	0.717391
GUT_GENOME041731	GUT_GENOME228470	88.8811	617	920	0.670652
GUT_GENOME041731	GUT_GENOME259926	88.8794	657	920	0.71413
GUT_GENOME041731	GUT_GENOME004204	88.8624	637	920	0.692391
GUT_GENOME041731	GUT_GENOME261056	88.8411	629	920	0.683696
GUT_GENOME041731	GUT_GENOME082868	88.8377	601	920	0.653261
GUT_GENOME041731	GUT_GENOME197978	88.8347	606	920	0.658696
GUT_GENOME041731	GUT_GENOME044157	88.816	577	920	0.627174
GUT_GENOME041731	GUT_GENOME255937	88.804	645	920	0.701087
GUT_GENOME041731	GUT_GENOME040647	88.7894	614	920	0.667391
GUT_GENOME041731	GUT_GENOME025391	88.7828	649	920	0.705435
GUT_GENOME041731	GUT_GENOME284371	88.7706	647	920	0.703261
GUT_GENOME041731	GUT_GENOME237017	88.7668	655	920	0.711957
GUT_GENOME041731	GUT_GENOME024044	88.7535	649	920	0.705435
GUT_GENOME041731	GUT_GENOME256352	88.7481	640	920	0.695652
GUT_GENOME041731	GUT_GENOME100934	88.7097	647	920	0.703261
GUT_GENOME041731	GUT_GENOME199294	88.704	617	920	0.670652
GUT_GENOME041731	GUT_GENOME203567	88.6882	630	920	0.684783
GUT_GENOME041731	GUT_GENOME070705	88.6785	542	920	0.58913
GUT_GENOME041731	GUT_GENOME114896	88.6778	644	920	0.7
GUT_GENOME041731	GUT_GENOME148080	88.6768	633	920	0.688043
GUT_GENOME041731	GUT_GENOME000977	88.6751	650	920	0.706522
GUT_GENOME041731	GUT_GENOME020289	88.6441	641	920	0.696739
GUT_GENOME041731	GUT_GENOME022435	88.6053	598	920	0.65
GUT_GENOME041731	GUT_GENOME268679	88.6	588	920	0.63913
GUT_GENOME041731	GUT_GENOME283661	88.593	625	920	0.679348
GUT_GENOME041731	GUT_GENOME077038	88.5808	607	920	0.659783
GUT_GENOME041731	GUT_GENOME112073	88.5271	628	920	0.682609
GUT_GENOME041731	GUT_GENOME280050	88.5111	632	920	0.686957
GUT_GENOME041731	GUT_GENOME008526	88.5099	584	920	0.634783
GUT_GENOME041731	GUT_GENOME164892	88.4895	575	920	0.625
GUT_GENOME041731	GUT_GENOME004475	88.4381	552	920	0.6
GUT_GENOME041731	GUT_GENOME017328	88.3648	610	920	0.663043
GUT_GENOME041731	GUT_GENOME250382	88.2713	634	920	0.68913
GUT_GENOME041731	GUT_GENOME194478	88.2465	606	920	0.658696
GUT_GENOME041731	GUT_GENOME079065	88.2395	594	920	0.645652
GUT_GENOME041731	GUT_GENOME234468	88.1787	591	920	0.642391
GUT_GENOME041731	GUT_GENOME070238	87.9427	571	920	0.620652
GUT_GENOME041731	GUT_GENOME116467	87.8719	612	920	0.665217
GUT_GENOME255532	GUT_GENOME259926	99.5265	882	948	0.93038
GUT_GENOME255532	GUT_GENOME000172	98.9283	864	948	0.911392
GUT_GENOME255532	GUT_GENOME268679	98.9081	748	948	0.78903
GUT_GENOME255532	GUT_GENOME044157	98.8153	741	948	0.781646
GUT_GENOME255532	GUT_GENOME056667	98.7891	770	948	0.812236
GUT_GENOME255532	GUT_GENOME022435	98.789	753	948	0.794304
GUT_GENOME255532	GUT_GENOME284371	98.7797	830	948	0.875527
GUT_GENOME255532	GUT_GENOME255937	98.7661	833	948	0.878692
GUT_GENOME255532	GUT_GENOME100934	98.7448	825	948	0.870253
GUT_GENOME255532	GUT_GENOME197978	98.7236	772	948	0.814346
GUT_GENOME255532	GUT_GENOME079065	98.7168	785	948	0.828059
GUT_GENOME255532	GUT_GENOME237017	98.7054	850	948	0.896624
GUT_GENOME255532	GUT_GENOME261056	98.6947	838	948	0.883966
GUT_GENOME255532	GUT_GENOME256352	98.6896	843	948	0.889241
GUT_GENOME255532	GUT_GENOME025391	98.6838	844	948	0.890295
GUT_GENOME255532	GUT_GENOME272604	98.6764	774	948	0.816456
GUT_GENOME255532	GUT_GENOME112073	98.6595	805	948	0.849156
GUT_GENOME255532	GUT_GENOME245153	98.6568	816	948	0.860759
GUT_GENOME255532	GUT_GENOME059925	98.6532	827	948	0.872363
GUT_GENOME255532	GUT_GENOME077038	98.6463	789	948	0.832278
GUT_GENOME255532	GUT_GENOME004204	98.6416	819	948	0.863924
GUT_GENOME255532	GUT_GENOME040647	98.6393	775	948	0.817511
GUT_GENOME255532	GUT_GENOME194478	98.6379	785	948	0.828059
GUT_GENOME255532	GUT_GENOME203567	98.6367	816	948	0.860759
GUT_GENOME255532	GUT_GENOME114896	98.6294	840	948	0.886076
GUT_GENOME255532	GUT_GENOME020289	98.6087	805	948	0.849156
GUT_GENOME255532	GUT_GENOME283661	98.6014	798	948	0.841772
GUT_GENOME255532	GUT_GENOME004475	98.5714	680	948	0.7173
GUT_GENOME255532	GUT_GENOME280050	98.568	816	948	0.860759
GUT_GENOME255532	GUT_GENOME164892	98.5537	731	948	0.771097
GUT_GENOME255532	GUT_GENOME070705	98.5383	686	948	0.723629
GUT_GENOME255532	GUT_GENOME024044	98.5082	827	948	0.872363
GUT_GENOME255532	GUT_GENOME008526	98.4622	760	948	0.801688
GUT_GENOME255532	GUT_GENOME082868	98.4281	769	948	0.811181
GUT_GENOME255532	GUT_GENOME199294	98.3153	794	948	0.837553
GUT_GENOME255532	GUT_GENOME148080	98.2284	815	948	0.859705
GUT_GENOME255532	GUT_GENOME228470	98.1203	808	948	0.852321
GUT_GENOME255532	GUT_GENOME250382	98.0262	796	948	0.839662
GUT_GENOME255532	GUT_GENOME000977	97.7585	825	948	0.870253
GUT_GENOME255532	GUT_GENOME017328	97.7277	777	948	0.81962
GUT_GENOME255532	GUT_GENOME234468	97.7084	787	948	0.830169
GUT_GENOME255532	GUT_GENOME266759	89.2962	675	948	0.712025
GUT_GENOME255532	GUT_GENOME269593	89.2344	659	948	0.695148
GUT_GENOME255532	GUT_GENOME272961	89.2321	668	948	0.704641
GUT_GENOME255532	GUT_GENOME023277	89.1705	634	948	0.668776
GUT_GENOME255532	GUT_GENOME252536	89.0742	669	948	0.705696
GUT_GENOME255532	GUT_GENOME011904	89.0669	619	948	0.652954
GUT_GENOME255532	GUT_GENOME039234	88.9818	642	948	0.677215
GUT_GENOME255532	GUT_GENOME070238	87.95	596	948	0.628692
GUT_GENOME255532	GUT_GENOME116467	87.871	632	948	0.666667
GUT_GENOME266597	GUT_GENOME086676	98.2102	687	769	0.893368
GUT_GENOME266597	GUT_GENOME015837	98.1638	703	769	0.914174
GUT_GENOME266597	GUT_GENOME025615	98.157	697	769	0.906372
GUT_GENOME266597	GUT_GENOME161309	98.0731	567	769	0.737321
GUT_GENOME071421	GUT_GENOME007205	99.0686	726	951	0.763407
GUT_GENOME071421	GUT_GENOME116561	98.9343	741	951	0.77918
GUT_GENOME071421	GUT_GENOME117486	98.9123	741	951	0.77918
GUT_GENOME071421	GUT_GENOME209369	98.8416	729	951	0.766562
GUT_GENOME071421	GUT_GENOME016657	98.7194	687	951	0.722397
GUT_GENOME071421	GUT_GENOME178562	97.9566	690	951	0.725552
GUT_GENOME071421	GUT_GENOME023119	94.4295	696	951	0.731861
GUT_GENOME071421	GUT_GENOME134342	94.3554	670	951	0.704522
GUT_GENOME071421	GUT_GENOME007468	94.3226	676	951	0.710831
GUT_GENOME071421	GUT_GENOME081229	94.3003	657	951	0.690852
GUT_GENOME071421	GUT_GENOME114128	94.2283	687	951	0.722397
GUT_GENOME071421	GUT_GENOME135134	94.1429	663	951	0.697161
GUT_GENOME071421	GUT_GENOME255327	94.0991	660	951	0.694006
GUT_GENOME071421	GUT_GENOME113260	94.0716	679	951	0.713985
GUT_GENOME071421	GUT_GENOME001864	94.0673	688	951	0.723449
GUT_GENOME071421	GUT_GENOME216494	94.047	671	951	0.705573
GUT_GENOME071421	GUT_GENOME052950	94.0355	623	951	0.6551
GUT_GENOME071421	GUT_GENOME104328	94.0055	652	951	0.685594
GUT_GENOME071421	GUT_GENOME152168	94.0002	701	951	0.737119
GUT_GENOME071421	GUT_GENOME154601	93.993	685	951	0.720294
GUT_GENOME071421	GUT_GENOME000911	93.9867	696	951	0.731861
GUT_GENOME071421	GUT_GENOME151433	93.9601	685	951	0.720294
GUT_GENOME071421	GUT_GENOME034920	93.9457	646	951	0.679285
GUT_GENOME071421	GUT_GENOME034785	93.7525	608	951	0.639327
GUT_GENOME277621	GUT_GENOME194478	98.7036	791	960	0.823958
GUT_GENOME277621	GUT_GENOME255937	98.6919	837	960	0.871875
GUT_GENOME277621	GUT_GENOME114896	98.6533	837	960	0.871875
GUT_GENOME277621	GUT_GENOME237017	98.6333	844	960	0.879167
GUT_GENOME277621	GUT_GENOME112073	98.6231	802	960	0.835417
GUT_GENOME277621	GUT_GENOME056667	98.612	764	960	0.795833
GUT_GENOME277621	GUT_GENOME284371	98.6099	846	960	0.88125
GUT_GENOME277621	GUT_GENOME077038	98.6006	802	960	0.835417
GUT_GENOME277621	GUT_GENOME203567	98.5979	819	960	0.853125
GUT_GENOME277621	GUT_GENOME024044	98.5946	825	960	0.859375
GUT_GENOME277621	GUT_GENOME004204	98.5891	838	960	0.872917
GUT_GENOME277621	GUT_GENOME022435	98.5794	761	960	0.792708
GUT_GENOME277621	GUT_GENOME020289	98.5776	794	960	0.827083
GUT_GENOME277621	GUT_GENOME268679	98.5692	736	960	0.766667
GUT_GENOME277621	GUT_GENOME283661	98.5643	814	960	0.847917
GUT_GENOME277621	GUT_GENOME059925	98.5615	819	960	0.853125
GUT_GENOME277621	GUT_GENOME100934	98.5562	835	960	0.869792
GUT_GENOME277621	GUT_GENOME280050	98.5426	821	960	0.855208
GUT_GENOME277621	GUT_GENOME197978	98.5425	788	960	0.820833
GUT_GENOME277621	GUT_GENOME272604	98.5281	780	960	0.8125
GUT_GENOME277621	GUT_GENOME079065	98.5257	774	960	0.80625
GUT_GENOME277621	GUT_GENOME261056	98.5117	831	960	0.865625
GUT_GENOME277621	GUT_GENOME025391	98.5071	827	960	0.861458
GUT_GENOME277621	GUT_GENOME259926	98.5071	849	960	0.884375
GUT_GENOME277621	GUT_GENOME040647	98.4782	785	960	0.817708
GUT_GENOME277621	GUT_GENOME008526	98.4725	747	960	0.778125
GUT_GENOME277621	GUT_GENOME256352	98.4679	822	960	0.85625
GUT_GENOME277621	GUT_GENOME000172	98.4524	855	960	0.890625
GUT_GENOME277621	GUT_GENOME004475	98.4109	674	960	0.702083
GUT_GENOME277621	GUT_GENOME070705	98.3955	686	960	0.714583
GUT_GENOME277621	GUT_GENOME164892	98.3753	740	960	0.770833
GUT_GENOME277621	GUT_GENOME245153	98.3746	829	960	0.863542
GUT_GENOME277621	GUT_GENOME044157	98.3025	751	960	0.782292
GUT_GENOME277621	GUT_GENOME199294	98.3015	796	960	0.829167
GUT_GENOME277621	GUT_GENOME082868	98.2707	773	960	0.805208
GUT_GENOME277621	GUT_GENOME148080	98.1879	818	960	0.852083
GUT_GENOME277621	GUT_GENOME228470	98.1051	806	960	0.839583
GUT_GENOME277621	GUT_GENOME250382	97.9683	811	960	0.844792
GUT_GENOME277621	GUT_GENOME234468	97.7763	767	960	0.798958
GUT_GENOME277621	GUT_GENOME017328	97.6802	790	960	0.822917
GUT_GENOME277621	GUT_GENOME000977	97.6709	847	960	0.882292
GUT_GENOME277621	GUT_GENOME266759	89.0192	667	960	0.694792
GUT_GENOME277621	GUT_GENOME272961	88.9576	661	960	0.688542
GUT_GENOME277621	GUT_GENOME023277	88.8982	643	960	0.669792
GUT_GENOME277621	GUT_GENOME252536	88.8861	672	960	0.7
GUT_GENOME277621	GUT_GENOME011904	88.8187	618	960	0.64375
GUT_GENOME277621	GUT_GENOME039234	88.762	655	960	0.682292
GUT_GENOME277621	GUT_GENOME269593	88.7553	671	960	0.698958
GUT_GENOME277621	GUT_GENOME116467	87.854	625	960	0.651042
GUT_GENOME277621	GUT_GENOME070238	87.8521	601	960	0.626042
GUT_GENOME268418	GUT_GENOME114896	99.0001	839	938	0.894456
GUT_GENOME268418	GUT_GENOME022435	98.9733	764	938	0.814499
GUT_GENOME268418	GUT_GENOME268679	98.9075	739	938	0.787846
GUT_GENOME268418	GUT_GENOME284371	98.8847	830	938	0.884861
GUT_GENOME268418	GUT_GENOME197978	98.8827	787	938	0.839019
GUT_GENOME268418	GUT_GENOME283661	98.8636	812	938	0.865672
GUT_GENOME268418	GUT_GENOME259926	98.8346	850	938	0.906183
GUT_GENOME268418	GUT_GENOME272604	98.8196	784	938	0.835821
GUT_GENOME268418	GUT_GENOME280050	98.8187	836	938	0.891258
GUT_GENOME268418	GUT_GENOME237017	98.7784	846	938	0.901919
GUT_GENOME268418	GUT_GENOME008526	98.7775	765	938	0.815565
GUT_GENOME268418	GUT_GENOME194478	98.7737	802	938	0.855011
GUT_GENOME268418	GUT_GENOME000172	98.7734	879	938	0.9371
GUT_GENOME268418	GUT_GENOME203567	98.7625	812	938	0.865672
GUT_GENOME268418	GUT_GENOME261056	98.7622	848	938	0.904051
GUT_GENOME268418	GUT_GENOME004204	98.7621	813	938	0.866738
GUT_GENOME268418	GUT_GENOME100934	98.7591	825	938	0.879531
GUT_GENOME268418	GUT_GENOME059925	98.7572	829	938	0.883795
GUT_GENOME268418	GUT_GENOME256352	98.7544	843	938	0.898721
GUT_GENOME268418	GUT_GENOME025391	98.7447	837	938	0.892324
GUT_GENOME268418	GUT_GENOME077038	98.7322	797	938	0.84968
GUT_GENOME268418	GUT_GENOME255937	98.7238	838	938	0.89339
GUT_GENOME268418	GUT_GENOME024044	98.7191	832	938	0.886994
GUT_GENOME268418	GUT_GENOME079065	98.709	789	938	0.841151
GUT_GENOME268418	GUT_GENOME112073	98.6921	810	938	0.863539
GUT_GENOME268418	GUT_GENOME020289	98.6759	803	938	0.856077
GUT_GENOME268418	GUT_GENOME245153	98.6727	824	938	0.878465
GUT_GENOME268418	GUT_GENOME040647	98.6653	797	938	0.84968
GUT_GENOME268418	GUT_GENOME056667	98.6472	782	938	0.833689
GUT_GENOME268418	GUT_GENOME044157	98.6386	748	938	0.797441
GUT_GENOME268418	GUT_GENOME070705	98.6255	697	938	0.74307
GUT_GENOME268418	GUT_GENOME004475	98.6194	681	938	0.726013
GUT_GENOME268418	GUT_GENOME164892	98.5985	744	938	0.793177
GUT_GENOME268418	GUT_GENOME082868	98.4415	770	938	0.820896
GUT_GENOME268418	GUT_GENOME199294	98.3462	804	938	0.857143
GUT_GENOME268418	GUT_GENOME228470	98.2637	805	938	0.858209
GUT_GENOME268418	GUT_GENOME148080	98.2512	822	938	0.876333
GUT_GENOME268418	GUT_GENOME250382	98.2056	805	938	0.858209
GUT_GENOME268418	GUT_GENOME000977	97.8944	837	938	0.892324
GUT_GENOME268418	GUT_GENOME017328	97.8496	774	938	0.82516
GUT_GENOME268418	GUT_GENOME234468	97.7668	781	938	0.832623
GUT_GENOME268418	GUT_GENOME266759	88.771	671	938	0.715352
GUT_GENOME268418	GUT_GENOME023277	88.6996	646	938	0.688699
GUT_GENOME268418	GUT_GENOME039234	88.6939	647	938	0.689765
GUT_GENOME268418	GUT_GENOME269593	88.5607	674	938	0.71855
GUT_GENOME268418	GUT_GENOME272961	88.527	685	938	0.730277
GUT_GENOME268418	GUT_GENOME011904	88.4929	625	938	0.666311
GUT_GENOME268418	GUT_GENOME252536	88.4811	667	938	0.711087
GUT_GENOME268418	GUT_GENOME070238	87.8679	599	938	0.638593
GUT_GENOME268418	GUT_GENOME116467	87.7966	628	938	0.66951
GUT_GENOME117489	GUT_GENOME116561	98.9302	738	809	0.912237
GUT_GENOME117489	GUT_GENOME007205	98.8411	725	809	0.896168
GUT_GENOME117489	GUT_GENOME117486	98.8369	742	809	0.917182
GUT_GENOME117489	GUT_GENOME209369	98.8305	723	809	0.893696
GUT_GENOME117489	GUT_GENOME016657	98.7018	685	809	0.846724
GUT_GENOME117489	GUT_GENOME178562	98.0392	702	809	0.867738
GUT_GENOME117489	GUT_GENOME007468	94.3175	685	809	0.846724
GUT_GENOME117489	GUT_GENOME135134	94.2801	663	809	0.81953
GUT_GENOME117489	GUT_GENOME114128	94.2662	678	809	0.838072
GUT_GENOME117489	GUT_GENOME023119	94.2617	689	809	0.851669
GUT_GENOME117489	GUT_GENOME052950	94.2434	632	809	0.781211
GUT_GENOME117489	GUT_GENOME134342	94.2365	684	809	0.845488
GUT_GENOME117489	GUT_GENOME081229	94.2199	665	809	0.822002
GUT_GENOME117489	GUT_GENOME151433	94.2074	667	809	0.824475
GUT_GENOME117489	GUT_GENOME255327	94.1358	663	809	0.81953
GUT_GENOME117489	GUT_GENOME001864	94.1249	675	809	0.834363
GUT_GENOME117489	GUT_GENOME000911	94.0852	687	809	0.849197
GUT_GENOME117489	GUT_GENOME216494	94.0508	668	809	0.825711
GUT_GENOME117489	GUT_GENOME154601	94.0415	676	809	0.8356
GUT_GENOME117489	GUT_GENOME034920	94.011	644	809	0.796044
GUT_GENOME117489	GUT_GENOME113260	93.9496	682	809	0.843016
GUT_GENOME117489	GUT_GENOME152168	93.8908	684	809	0.845488
GUT_GENOME117489	GUT_GENOME104328	93.8883	650	809	0.803461
GUT_GENOME117489	GUT_GENOME034785	93.8656	609	809	0.752781
GUT_GENOME077627	GUT_GENOME059925	98.9192	771	846	0.911348
GUT_GENOME077627	GUT_GENOME237017	98.8787	790	846	0.933806
GUT_GENOME077627	GUT_GENOME284371	98.8714	779	846	0.920804
GUT_GENOME077627	GUT_GENOME077038	98.8673	752	846	0.888889
GUT_GENOME077627	GUT_GENOME194478	98.8631	746	846	0.881797
GUT_GENOME077627	GUT_GENOME203567	98.8627	772	846	0.91253
GUT_GENOME077627	GUT_GENOME255937	98.8514	779	846	0.920804
GUT_GENOME077627	GUT_GENOME272604	98.8446	737	846	0.871158
GUT_GENOME077627	GUT_GENOME197978	98.8254	747	846	0.882979
GUT_GENOME077627	GUT_GENOME004204	98.817	771	846	0.911348
GUT_GENOME077627	GUT_GENOME079065	98.8156	758	846	0.895981
GUT_GENOME077627	GUT_GENOME114896	98.8133	783	846	0.925532
GUT_GENOME077627	GUT_GENOME112073	98.7886	770	846	0.910165
GUT_GENOME077627	GUT_GENOME283661	98.762	768	846	0.907801
GUT_GENOME077627	GUT_GENOME025391	98.7603	790	846	0.933806
GUT_GENOME077627	GUT_GENOME056667	98.7534	733	846	0.86643
GUT_GENOME077627	GUT_GENOME261056	98.7508	785	846	0.927896
GUT_GENOME077627	GUT_GENOME259926	98.7427	790	846	0.933806
GUT_GENOME077627	GUT_GENOME022435	98.7309	721	846	0.852246
GUT_GENOME077627	GUT_GENOME100934	98.7254	789	846	0.932624
GUT_GENOME077627	GUT_GENOME000172	98.7139	812	846	0.959811
GUT_GENOME077627	GUT_GENOME040647	98.7053	746	846	0.881797
GUT_GENOME077627	GUT_GENOME008526	98.6974	703	846	0.830969
GUT_GENOME077627	GUT_GENOME280050	98.687	764	846	0.903073
GUT_GENOME077627	GUT_GENOME256352	98.6868	776	846	0.917258
GUT_GENOME077627	GUT_GENOME268679	98.6812	697	846	0.823877
GUT_GENOME077627	GUT_GENOME024044	98.6798	786	846	0.929078
GUT_GENOME077627	GUT_GENOME245153	98.6758	780	846	0.921986
GUT_GENOME077627	GUT_GENOME004475	98.6621	645	846	0.762411
GUT_GENOME077627	GUT_GENOME020289	98.6362	760	846	0.898345
GUT_GENOME077627	GUT_GENOME164892	98.5863	698	846	0.825059
GUT_GENOME077627	GUT_GENOME070705	98.5712	665	846	0.786052
GUT_GENOME077627	GUT_GENOME044157	98.4745	703	846	0.830969
GUT_GENOME077627	GUT_GENOME082868	98.4384	731	846	0.864066
GUT_GENOME077627	GUT_GENOME148080	98.3974	774	846	0.914894
GUT_GENOME077627	GUT_GENOME250382	98.287	747	846	0.882979
GUT_GENOME077627	GUT_GENOME199294	98.2864	736	846	0.869976
GUT_GENOME077627	GUT_GENOME228470	98.2667	747	846	0.882979
GUT_GENOME077627	GUT_GENOME234468	97.9284	726	846	0.858156
GUT_GENOME077627	GUT_GENOME000977	97.8692	775	846	0.916076
GUT_GENOME077627	GUT_GENOME017328	97.8466	724	846	0.855792
GUT_GENOME077627	GUT_GENOME269593	88.5717	618	846	0.730496
GUT_GENOME077627	GUT_GENOME023277	88.5347	598	846	0.706856
GUT_GENOME077627	GUT_GENOME266759	88.5235	631	846	0.745863
GUT_GENOME077627	GUT_GENOME252536	88.4728	632	846	0.747045
GUT_GENOME077627	GUT_GENOME011904	88.4709	582	846	0.687943
GUT_GENOME077627	GUT_GENOME039234	88.4313	608	846	0.718676
GUT_GENOME077627	GUT_GENOME272961	88.4295	623	846	0.736407
GUT_GENOME077627	GUT_GENOME070238	87.8321	554	846	0.654846
GUT_GENOME077627	GUT_GENOME116467	87.6626	592	846	0.699764
GUT_GENOME049924	GUT_GENOME082868	98.7809	754	888	0.849099
GUT_GENOME049924	GUT_GENOME250382	98.5882	790	888	0.88964
GUT_GENOME049924	GUT_GENOME148080	98.5249	802	888	0.903153
GUT_GENOME049924	GUT_GENOME255937	98.4837	795	888	0.89527
GUT_GENOME049924	GUT_GENOME272604	98.4245	754	888	0.849099
GUT_GENOME049924	GUT_GENOME261056	98.4077	803	888	0.904279
GUT_GENOME049924	GUT_GENOME194478	98.3965	780	888	0.878378
GUT_GENOME049924	GUT_GENOME112073	98.3928	782	888	0.880631
GUT_GENOME049924	GUT_GENOME040647	98.3858	757	888	0.852477
GUT_GENOME049924	GUT_GENOME197978	98.3852	756	888	0.851351
GUT_GENOME049924	GUT_GENOME228470	98.371	797	888	0.897523
GUT_GENOME049924	GUT_GENOME237017	98.3599	811	888	0.913288
GUT_GENOME049924	GUT_GENOME114896	98.3547	797	888	0.897523
GUT_GENOME049924	GUT_GENOME020289	98.3511	776	888	0.873874
GUT_GENOME049924	GUT_GENOME100934	98.3466	796	888	0.896396
GUT_GENOME049924	GUT_GENOME059925	98.3463	789	888	0.888514
GUT_GENOME049924	GUT_GENOME024044	98.3207	800	888	0.900901
GUT_GENOME049924	GUT_GENOME283661	98.3189	778	888	0.876126
GUT_GENOME049924	GUT_GENOME025391	98.3181	811	888	0.913288
GUT_GENOME049924	GUT_GENOME079065	98.3129	765	888	0.861486
GUT_GENOME049924	GUT_GENOME022435	98.3111	726	888	0.817568
GUT_GENOME049924	GUT_GENOME004204	98.3086	778	888	0.876126
GUT_GENOME049924	GUT_GENOME284371	98.2935	807	888	0.908784
GUT_GENOME049924	GUT_GENOME056667	98.2921	735	888	0.827703
GUT_GENOME049924	GUT_GENOME259926	98.2802	817	888	0.920045
GUT_GENOME049924	GUT_GENOME000977	98.2722	810	888	0.912162
GUT_GENOME049924	GUT_GENOME077038	98.2693	783	888	0.881757
GUT_GENOME049924	GUT_GENOME256352	98.265	800	888	0.900901
GUT_GENOME049924	GUT_GENOME017328	98.254	778	888	0.876126
GUT_GENOME049924	GUT_GENOME268679	98.2521	712	888	0.801802
GUT_GENOME049924	GUT_GENOME000172	98.2407	824	888	0.927928
GUT_GENOME049924	GUT_GENOME070705	98.2401	659	888	0.742117
GUT_GENOME049924	GUT_GENOME280050	98.2355	802	888	0.903153
GUT_GENOME049924	GUT_GENOME164892	98.2238	710	888	0.79955
GUT_GENOME049924	GUT_GENOME008526	98.2142	718	888	0.808559
GUT_GENOME049924	GUT_GENOME203567	98.1878	791	888	0.890766
GUT_GENOME049924	GUT_GENOME245153	98.185	790	888	0.88964
GUT_GENOME049924	GUT_GENOME234468	98.1839	778	888	0.876126
GUT_GENOME049924	GUT_GENOME004475	98.1824	650	888	0.731982
GUT_GENOME049924	GUT_GENOME044157	98.1257	706	888	0.795045
GUT_GENOME049924	GUT_GENOME199294	98.0769	771	888	0.868243
GUT_GENOME049924	GUT_GENOME266759	88.571	645	888	0.726351
GUT_GENOME049924	GUT_GENOME252536	88.567	645	888	0.726351
GUT_GENOME049924	GUT_GENOME039234	88.4969	618	888	0.695946
GUT_GENOME049924	GUT_GENOME023277	88.4325	615	888	0.692568
GUT_GENOME049924	GUT_GENOME011904	88.312	589	888	0.663288
GUT_GENOME049924	GUT_GENOME269593	88.2992	644	888	0.725225
GUT_GENOME049924	GUT_GENOME272961	88.2689	654	888	0.736486
GUT_GENOME049924	GUT_GENOME116467	87.5735	602	888	0.677928
GUT_GENOME049924	GUT_GENOME070238	87.5686	570	888	0.641892
GUT_GENOME093368	GUT_GENOME269593	98.6939	846	966	0.875776
GUT_GENOME093368	GUT_GENOME266759	98.6769	865	966	0.895445
GUT_GENOME093368	GUT_GENOME023277	98.5608	815	966	0.843685
GUT_GENOME093368	GUT_GENOME039234	98.5279	856	966	0.886128
GUT_GENOME093368	GUT_GENOME252536	98.5152	857	966	0.887164
GUT_GENOME093368	GUT_GENOME272961	98.4925	856	966	0.886128
GUT_GENOME093368	GUT_GENOME011904	98.3122	777	966	0.804348
GUT_GENOME093368	GUT_GENOME255937	89.2827	662	966	0.6853
GUT_GENOME093368	GUT_GENOME259926	89.2409	665	966	0.688406
GUT_GENOME093368	GUT_GENOME272604	89.2401	621	966	0.642857
GUT_GENOME093368	GUT_GENOME040647	89.1735	618	966	0.639752
GUT_GENOME093368	GUT_GENOME284371	89.1726	666	966	0.689441
GUT_GENOME093368	GUT_GENOME059925	89.1725	651	966	0.673913
GUT_GENOME093368	GUT_GENOME100934	89.1675	656	966	0.679089
GUT_GENOME093368	GUT_GENOME197978	89.1536	627	966	0.649068
GUT_GENOME093368	GUT_GENOME025391	89.1491	658	966	0.681159
GUT_GENOME093368	GUT_GENOME268679	89.134	605	966	0.626294
GUT_GENOME093368	GUT_GENOME000172	89.131	694	966	0.718427
GUT_GENOME093368	GUT_GENOME070705	89.1232	558	966	0.57764
GUT_GENOME093368	GUT_GENOME022435	89.1104	582	966	0.602484
GUT_GENOME093368	GUT_GENOME256352	89.0975	653	966	0.675983
GUT_GENOME093368	GUT_GENOME283661	89.0955	634	966	0.656315
GUT_GENOME093368	GUT_GENOME082868	89.0953	602	966	0.623188
GUT_GENOME093368	GUT_GENOME008526	89.0815	602	966	0.623188
GUT_GENOME093368	GUT_GENOME261056	89.071	666	966	0.689441
GUT_GENOME093368	GUT_GENOME044157	89.0624	593	966	0.613872
GUT_GENOME093368	GUT_GENOME024044	89.0557	673	966	0.696687
GUT_GENOME093368	GUT_GENOME004204	89.0386	639	966	0.661491
GUT_GENOME093368	GUT_GENOME056667	89.0294	626	966	0.648033
GUT_GENOME093368	GUT_GENOME203567	89.0244	644	966	0.666667
GUT_GENOME093368	GUT_GENOME245153	88.9979	654	966	0.677019
GUT_GENOME093368	GUT_GENOME237017	88.9906	667	966	0.690476
GUT_GENOME093368	GUT_GENOME114896	88.9846	662	966	0.6853
GUT_GENOME093368	GUT_GENOME280050	88.9788	649	966	0.671843
GUT_GENOME093368	GUT_GENOME020289	88.9694	644	966	0.666667
GUT_GENOME093368	GUT_GENOME199294	88.9392	637	966	0.65942
GUT_GENOME093368	GUT_GENOME112073	88.9321	651	966	0.673913
GUT_GENOME093368	GUT_GENOME077038	88.8172	624	966	0.645963
GUT_GENOME093368	GUT_GENOME228470	88.799	627	966	0.649068
GUT_GENOME093368	GUT_GENOME194478	88.7555	611	966	0.632505
GUT_GENOME093368	GUT_GENOME148080	88.7471	657	966	0.680124
GUT_GENOME093368	GUT_GENOME079065	88.745	606	966	0.627329
GUT_GENOME093368	GUT_GENOME250382	88.7141	635	966	0.65735
GUT_GENOME093368	GUT_GENOME004475	88.7057	562	966	0.581781
GUT_GENOME093368	GUT_GENOME000977	88.6671	672	966	0.695652
GUT_GENOME093368	GUT_GENOME164892	88.6669	585	966	0.60559
GUT_GENOME093368	GUT_GENOME017328	88.4739	618	966	0.639752
GUT_GENOME093368	GUT_GENOME234468	88.4589	612	966	0.63354
GUT_GENOME093368	GUT_GENOME070238	88.032	587	966	0.60766
GUT_GENOME093368	GUT_GENOME116467	87.9038	625	966	0.646998
GUT_GENOME263389	GUT_GENOME001864	98.7858	752	821	0.915956
GUT_GENOME263389	GUT_GENOME152168	98.7603	754	821	0.918392
GUT_GENOME263389	GUT_GENOME034920	98.7144	718	821	0.874543
GUT_GENOME263389	GUT_GENOME151433	98.7124	751	821	0.914738
GUT_GENOME263389	GUT_GENOME104328	98.7017	727	821	0.885505
GUT_GENOME263389	GUT_GENOME000911	98.6795	758	821	0.923264
GUT_GENOME263389	GUT_GENOME034785	98.6413	658	821	0.801462
GUT_GENOME263389	GUT_GENOME113260	98.5645	745	821	0.90743
GUT_GENOME263389	GUT_GENOME154601	98.5565	746	821	0.908648
GUT_GENOME263389	GUT_GENOME081229	98.2964	726	821	0.884287
GUT_GENOME263389	GUT_GENOME023119	97.9327	733	821	0.892814
GUT_GENOME263389	GUT_GENOME134342	97.9245	732	821	0.891596
GUT_GENOME263389	GUT_GENOME114128	97.8828	724	821	0.881851
GUT_GENOME263389	GUT_GENOME007468	97.8815	723	821	0.880633
GUT_GENOME263389	GUT_GENOME135134	97.8561	713	821	0.868453
GUT_GENOME263389	GUT_GENOME052950	97.85	697	821	0.848965
GUT_GENOME263389	GUT_GENOME255327	97.8462	725	821	0.883069
GUT_GENOME263389	GUT_GENOME216494	97.7755	708	821	0.862363
GUT_GENOME263389	GUT_GENOME178562	94.1407	621	821	0.756395
GUT_GENOME263389	GUT_GENOME016657	94.1322	626	821	0.762485
GUT_GENOME263389	GUT_GENOME209369	94.085	655	821	0.797808
GUT_GENOME263389	GUT_GENOME117486	94.067	669	821	0.81486
GUT_GENOME263389	GUT_GENOME116561	93.9663	668	821	0.813642
GUT_GENOME263389	GUT_GENOME007205	93.8776	646	821	0.786845
GUT_GENOME061028	GUT_GENOME134342	98.848	766	876	0.874429
GUT_GENOME061028	GUT_GENOME007468	98.7911	777	876	0.886986
GUT_GENOME061028	GUT_GENOME052950	98.7764	721	876	0.823059
GUT_GENOME061028	GUT_GENOME023119	98.7383	789	876	0.900685
GUT_GENOME061028	GUT_GENOME114128	98.6774	775	876	0.884703
GUT_GENOME061028	GUT_GENOME255327	98.6681	759	876	0.866438
GUT_GENOME061028	GUT_GENOME216494	98.5983	754	876	0.860731
GUT_GENOME061028	GUT_GENOME135134	98.5836	742	876	0.847032
GUT_GENOME061028	GUT_GENOME081229	98.4364	747	876	0.85274
GUT_GENOME061028	GUT_GENOME034785	98.0518	669	876	0.763699
GUT_GENOME061028	GUT_GENOME034920	98.0098	720	876	0.821918
GUT_GENOME061028	GUT_GENOME104328	97.9454	747	876	0.85274
GUT_GENOME061028	GUT_GENOME001864	97.9223	770	876	0.878995
GUT_GENOME061028	GUT_GENOME154601	97.8897	762	876	0.869863
GUT_GENOME061028	GUT_GENOME000911	97.8357	792	876	0.90411
GUT_GENOME061028	GUT_GENOME151433	97.822	762	876	0.869863
GUT_GENOME061028	GUT_GENOME152168	97.7971	775	876	0.884703
GUT_GENOME061028	GUT_GENOME113260	97.7826	758	876	0.865297
GUT_GENOME061028	GUT_GENOME016657	94.3621	637	876	0.727169
GUT_GENOME061028	GUT_GENOME209369	94.3391	686	876	0.783105
GUT_GENOME061028	GUT_GENOME117486	94.2692	689	876	0.78653
GUT_GENOME061028	GUT_GENOME007205	94.1712	686	876	0.783105
GUT_GENOME061028	GUT_GENOME116561	94.1562	697	876	0.795662
GUT_GENOME061028	GUT_GENOME178562	94.0047	655	876	0.747717
GUT_GENOME215021	GUT_GENOME022435	98.849	703	794	0.88539
GUT_GENOME215021	GUT_GENOME114896	98.7247	764	794	0.962217
GUT_GENOME215021	GUT_GENOME259926	98.7238	760	794	0.957179
GUT_GENOME215021	GUT_GENOME284371	98.7117	755	794	0.950882
GUT_GENOME215021	GUT_GENOME237017	98.6888	755	794	0.950882
GUT_GENOME215021	GUT_GENOME261056	98.6822	747	794	0.940806
GUT_GENOME215021	GUT_GENOME255937	98.6798	746	794	0.939547
GUT_GENOME215021	GUT_GENOME283661	98.6513	733	794	0.923174
GUT_GENOME215021	GUT_GENOME000172	98.6471	764	794	0.962217
GUT_GENOME215021	GUT_GENOME256352	98.6396	734	794	0.924433
GUT_GENOME215021	GUT_GENOME079065	98.6387	707	794	0.890428
GUT_GENOME215021	GUT_GENOME194478	98.631	720	794	0.906801
GUT_GENOME215021	GUT_GENOME197978	98.6269	718	794	0.904282
GUT_GENOME215021	GUT_GENOME280050	98.611	741	794	0.933249
GUT_GENOME215021	GUT_GENOME268679	98.608	678	794	0.853904
GUT_GENOME215021	GUT_GENOME004204	98.6026	737	794	0.928212
GUT_GENOME215021	GUT_GENOME100934	98.598	751	794	0.945844
GUT_GENOME215021	GUT_GENOME203567	98.5978	726	794	0.914358
GUT_GENOME215021	GUT_GENOME077038	98.5882	720	794	0.906801
GUT_GENOME215021	GUT_GENOME112073	98.5881	735	794	0.925693
GUT_GENOME215021	GUT_GENOME040647	98.5858	715	794	0.900504
GUT_GENOME215021	GUT_GENOME025391	98.5845	751	794	0.945844
GUT_GENOME215021	GUT_GENOME008526	98.5836	686	794	0.86398
GUT_GENOME215021	GUT_GENOME272604	98.5808	699	794	0.880353
GUT_GENOME215021	GUT_GENOME056667	98.5727	701	794	0.882872
GUT_GENOME215021	GUT_GENOME024044	98.5655	748	794	0.942065
GUT_GENOME215021	GUT_GENOME082868	98.5378	705	794	0.887909
GUT_GENOME215021	GUT_GENOME004475	98.5247	630	794	0.793451
GUT_GENOME215021	GUT_GENOME059925	98.5093	743	794	0.935768
GUT_GENOME215021	GUT_GENOME164892	98.4874	662	794	0.833753
GUT_GENOME215021	GUT_GENOME245153	98.4824	735	794	0.925693
GUT_GENOME215021	GUT_GENOME020289	98.4806	719	794	0.905542
GUT_GENOME215021	GUT_GENOME070705	98.4614	630	794	0.793451
GUT_GENOME215021	GUT_GENOME044157	98.4262	672	794	0.846348
GUT_GENOME215021	GUT_GENOME228470	98.4166	724	794	0.911839
GUT_GENOME215021	GUT_GENOME250382	98.4006	718	794	0.904282
GUT_GENOME215021	GUT_GENOME148080	98.3636	741	794	0.933249
GUT_GENOME215021	GUT_GENOME199294	98.2019	741	794	0.933249
GUT_GENOME215021	GUT_GENOME000977	98.1157	745	794	0.938287
GUT_GENOME215021	GUT_GENOME017328	98.0995	721	794	0.90806
GUT_GENOME215021	GUT_GENOME234468	98.0407	703	794	0.88539
GUT_GENOME215021	GUT_GENOME023277	88.801	582	794	0.732997
GUT_GENOME215021	GUT_GENOME266759	88.7627	610	794	0.768262
GUT_GENOME215021	GUT_GENOME269593	88.7328	596	794	0.75063
GUT_GENOME215021	GUT_GENOME011904	88.659	567	794	0.714106
GUT_GENOME215021	GUT_GENOME252536	88.6576	603	794	0.759446
GUT_GENOME215021	GUT_GENOME039234	88.5272	593	794	0.746851
GUT_GENOME215021	GUT_GENOME272961	88.5257	619	794	0.779597
GUT_GENOME215021	GUT_GENOME070238	87.8219	540	794	0.680101
GUT_GENOME215021	GUT_GENOME116467	87.6595	578	794	0.72796
GUT_GENOME011600	GUT_GENOME116467	98.8101	827	894	0.925056
GUT_GENOME011600	GUT_GENOME070238	98.7773	767	894	0.857942
GUT_GENOME011600	GUT_GENOME100934	88.0116	604	894	0.675615
GUT_GENOME011600	GUT_GENOME252536	87.965	610	894	0.682327
GUT_GENOME011600	GUT_GENOME266759	87.9254	624	894	0.697987
GUT_GENOME011600	GUT_GENOME011904	87.8989	582	894	0.651007
GUT_GENOME011600	GUT_GENOME272961	87.8963	615	894	0.687919
GUT_GENOME011600	GUT_GENOME024044	87.8636	613	894	0.685682
GUT_GENOME011600	GUT_GENOME203567	87.8503	603	894	0.674497
GUT_GENOME011600	GUT_GENOME025391	87.8203	620	894	0.693512
GUT_GENOME011600	GUT_GENOME039234	87.8201	608	894	0.680089
GUT_GENOME011600	GUT_GENOME023277	87.8181	597	894	0.667785
GUT_GENOME011600	GUT_GENOME070705	87.8168	517	894	0.5783
GUT_GENOME011600	GUT_GENOME197978	87.8138	588	894	0.657718
GUT_GENOME011600	GUT_GENOME004204	87.8058	594	894	0.66443
GUT_GENOME011600	GUT_GENOME283661	87.7971	598	894	0.668904
GUT_GENOME011600	GUT_GENOME268679	87.7907	554	894	0.619687
GUT_GENOME011600	GUT_GENOME259926	87.7834	634	894	0.709172
GUT_GENOME011600	GUT_GENOME269593	87.7747	611	894	0.683445
GUT_GENOME011600	GUT_GENOME280050	87.7524	587	894	0.6566
GUT_GENOME011600	GUT_GENOME237017	87.736	618	894	0.691275
GUT_GENOME011600	GUT_GENOME000172	87.7269	622	894	0.695749
GUT_GENOME011600	GUT_GENOME059925	87.7189	624	894	0.697987
GUT_GENOME011600	GUT_GENOME255937	87.6889	613	894	0.685682
GUT_GENOME011600	GUT_GENOME284371	87.6698	628	894	0.702461
GUT_GENOME011600	GUT_GENOME199294	87.6537	609	894	0.681208
GUT_GENOME011600	GUT_GENOME056667	87.6324	572	894	0.639821
GUT_GENOME011600	GUT_GENOME020289	87.6284	596	894	0.666667
GUT_GENOME011600	GUT_GENOME272604	87.6239	589	894	0.658837
GUT_GENOME011600	GUT_GENOME256352	87.6211	620	894	0.693512
GUT_GENOME011600	GUT_GENOME148080	87.5959	614	894	0.686801
GUT_GENOME011600	GUT_GENOME040647	87.5922	594	894	0.66443
GUT_GENOME011600	GUT_GENOME112073	87.5794	601	894	0.67226
GUT_GENOME011600	GUT_GENOME114896	87.573	621	894	0.694631
GUT_GENOME011600	GUT_GENOME008526	87.5679	572	894	0.639821
GUT_GENOME011600	GUT_GENOME022435	87.5655	565	894	0.631991
GUT_GENOME011600	GUT_GENOME082868	87.5561	582	894	0.651007
GUT_GENOME011600	GUT_GENOME245153	87.528	603	894	0.674497
GUT_GENOME011600	GUT_GENOME250382	87.5061	600	894	0.671141
GUT_GENOME011600	GUT_GENOME004475	87.5058	531	894	0.59396
GUT_GENOME011600	GUT_GENOME261056	87.503	622	894	0.695749
GUT_GENOME011600	GUT_GENOME000977	87.5019	632	894	0.706935
GUT_GENOME011600	GUT_GENOME077038	87.4878	592	894	0.662192
GUT_GENOME011600	GUT_GENOME044157	87.4642	563	894	0.629754
GUT_GENOME011600	GUT_GENOME017328	87.4392	586	894	0.655481
GUT_GENOME011600	GUT_GENOME194478	87.4288	591	894	0.661074
GUT_GENOME011600	GUT_GENOME164892	87.42	550	894	0.615213
GUT_GENOME011600	GUT_GENOME228470	87.3564	605	894	0.676734
GUT_GENOME011600	GUT_GENOME234468	87.2963	564	894	0.630872
GUT_GENOME011600	GUT_GENOME079065	87.2889	573	894	0.64094
GUT_GENOME229848	GUT_GENOME017328	98.5675	767	878	0.873576
GUT_GENOME229848	GUT_GENOME000977	98.5066	813	878	0.925968
GUT_GENOME229848	GUT_GENOME234468	98.4784	790	878	0.899772
GUT_GENOME229848	GUT_GENOME250382	98.3269	769	878	0.875854
GUT_GENOME229848	GUT_GENOME148080	98.305	781	878	0.889522
GUT_GENOME229848	GUT_GENOME082868	98.2402	733	878	0.834852
GUT_GENOME229848	GUT_GENOME228470	98.2003	781	878	0.889522
GUT_GENOME229848	GUT_GENOME194478	97.9436	750	878	0.854214
GUT_GENOME229848	GUT_GENOME025391	97.9283	795	878	0.905467
GUT_GENOME229848	GUT_GENOME284371	97.9229	779	878	0.887244
GUT_GENOME229848	GUT_GENOME024044	97.9176	798	878	0.908884
GUT_GENOME229848	GUT_GENOME100934	97.8995	773	878	0.88041
GUT_GENOME229848	GUT_GENOME079065	97.8854	746	878	0.849658
GUT_GENOME229848	GUT_GENOME022435	97.8811	722	878	0.822323
GUT_GENOME229848	GUT_GENOME114896	97.8688	793	878	0.903189
GUT_GENOME229848	GUT_GENOME261056	97.8687	793	878	0.903189
GUT_GENOME229848	GUT_GENOME059925	97.8629	775	878	0.882688
GUT_GENOME229848	GUT_GENOME056667	97.8355	727	878	0.828018
GUT_GENOME229848	GUT_GENOME004204	97.8339	762	878	0.867882
GUT_GENOME229848	GUT_GENOME237017	97.8303	810	878	0.922551
GUT_GENOME229848	GUT_GENOME040647	97.8233	750	878	0.854214
GUT_GENOME229848	GUT_GENOME197978	97.8121	739	878	0.841686
GUT_GENOME229848	GUT_GENOME020289	97.7991	770	878	0.876993
GUT_GENOME229848	GUT_GENOME203567	97.7963	762	878	0.867882
GUT_GENOME229848	GUT_GENOME259926	97.7947	796	878	0.906606
GUT_GENOME229848	GUT_GENOME070705	97.785	660	878	0.751708
GUT_GENOME229848	GUT_GENOME283661	97.7778	761	878	0.866743
GUT_GENOME229848	GUT_GENOME268679	97.7675	701	878	0.798405
GUT_GENOME229848	GUT_GENOME255937	97.7637	792	878	0.90205
GUT_GENOME229848	GUT_GENOME280050	97.7626	793	878	0.903189
GUT_GENOME229848	GUT_GENOME008526	97.757	713	878	0.812073
GUT_GENOME229848	GUT_GENOME112073	97.7442	765	878	0.871298
GUT_GENOME229848	GUT_GENOME272604	97.7388	728	878	0.829157
GUT_GENOME229848	GUT_GENOME199294	97.6981	762	878	0.867882
GUT_GENOME229848	GUT_GENOME245153	97.6887	782	878	0.890661
GUT_GENOME229848	GUT_GENOME004475	97.676	651	878	0.741458
GUT_GENOME229848	GUT_GENOME077038	97.6289	757	878	0.862187
GUT_GENOME229848	GUT_GENOME256352	97.627	790	878	0.899772
GUT_GENOME229848	GUT_GENOME000172	97.6171	809	878	0.921412
GUT_GENOME229848	GUT_GENOME164892	97.6054	698	878	0.794989
GUT_GENOME229848	GUT_GENOME044157	97.6009	697	878	0.79385
GUT_GENOME229848	GUT_GENOME252536	88.6139	626	878	0.712984
GUT_GENOME229848	GUT_GENOME272961	88.5968	629	878	0.716401
GUT_GENOME229848	GUT_GENOME269593	88.5869	633	878	0.720957
GUT_GENOME229848	GUT_GENOME039234	88.5683	608	878	0.692483
GUT_GENOME229848	GUT_GENOME266759	88.538	634	878	0.722096
GUT_GENOME229848	GUT_GENOME023277	88.445	604	878	0.687927
GUT_GENOME229848	GUT_GENOME011904	88.3802	584	878	0.665148
GUT_GENOME229848	GUT_GENOME116467	87.4948	605	878	0.689066
GUT_GENOME229848	GUT_GENOME070238	87.462	564	878	0.642369
GUT_GENOME066754	GUT_GENOME000172	98.8564	877	939	0.933972
GUT_GENOME066754	GUT_GENOME197978	98.8385	803	939	0.855165
GUT_GENOME066754	GUT_GENOME004204	98.8219	835	939	0.889244
GUT_GENOME066754	GUT_GENOME255937	98.817	849	939	0.904153
GUT_GENOME066754	GUT_GENOME059925	98.8076	845	939	0.899894
GUT_GENOME066754	GUT_GENOME056667	98.8009	795	939	0.846645
GUT_GENOME066754	GUT_GENOME194478	98.799	814	939	0.86688
GUT_GENOME066754	GUT_GENOME112073	98.78	840	939	0.894569
GUT_GENOME066754	GUT_GENOME079065	98.7762	799	939	0.850905
GUT_GENOME066754	GUT_GENOME077038	98.7701	816	939	0.86901
GUT_GENOME066754	GUT_GENOME272604	98.7481	790	939	0.841321
GUT_GENOME066754	GUT_GENOME284371	98.7427	838	939	0.892439
GUT_GENOME066754	GUT_GENOME114896	98.7369	859	939	0.914803
GUT_GENOME066754	GUT_GENOME261056	98.7329	864	939	0.920128
GUT_GENOME066754	GUT_GENOME259926	98.7256	868	939	0.924388
GUT_GENOME066754	GUT_GENOME237017	98.7168	874	939	0.930777
GUT_GENOME066754	GUT_GENOME025391	98.7155	863	939	0.919063
GUT_GENOME066754	GUT_GENOME203567	98.7149	840	939	0.894569
GUT_GENOME066754	GUT_GENOME100934	98.7146	846	939	0.900958
GUT_GENOME066754	GUT_GENOME283661	98.6992	823	939	0.876464
GUT_GENOME066754	GUT_GENOME268679	98.6819	758	939	0.807242
GUT_GENOME066754	GUT_GENOME008526	98.658	768	939	0.817891
GUT_GENOME066754	GUT_GENOME256352	98.6576	837	939	0.891374
GUT_GENOME066754	GUT_GENOME280050	98.6575	842	939	0.896699
GUT_GENOME066754	GUT_GENOME164892	98.6372	756	939	0.805112
GUT_GENOME066754	GUT_GENOME020289	98.6241	823	939	0.876464
GUT_GENOME066754	GUT_GENOME022435	98.6217	773	939	0.823216
GUT_GENOME066754	GUT_GENOME044157	98.5905	752	939	0.800852
GUT_GENOME066754	GUT_GENOME245153	98.5822	844	939	0.898829
GUT_GENOME066754	GUT_GENOME040647	98.5771	816	939	0.86901
GUT_GENOME066754	GUT_GENOME024044	98.5754	845	939	0.899894
GUT_GENOME066754	GUT_GENOME004475	98.5395	686	939	0.730564
GUT_GENOME066754	GUT_GENOME070705	98.4467	709	939	0.755059
GUT_GENOME066754	GUT_GENOME082868	98.4177	787	939	0.838126
GUT_GENOME066754	GUT_GENOME199294	98.332	819	939	0.872204
GUT_GENOME066754	GUT_GENOME148080	98.3031	849	939	0.904153
GUT_GENOME066754	GUT_GENOME250382	98.2131	811	939	0.863685
GUT_GENOME066754	GUT_GENOME228470	98.1329	817	939	0.870075
GUT_GENOME066754	GUT_GENOME000977	97.8711	841	939	0.895634
GUT_GENOME066754	GUT_GENOME234468	97.8288	785	939	0.835996
GUT_GENOME066754	GUT_GENOME017328	97.7756	792	939	0.84345
GUT_GENOME066754	GUT_GENOME023277	89.0028	651	939	0.693291
GUT_GENOME066754	GUT_GENOME039234	88.9767	660	939	0.702875
GUT_GENOME066754	GUT_GENOME011904	88.9572	620	939	0.660277
GUT_GENOME066754	GUT_GENOME269593	88.9331	673	939	0.71672
GUT_GENOME066754	GUT_GENOME252536	88.9274	689	939	0.733759
GUT_GENOME066754	GUT_GENOME272961	88.926	689	939	0.733759
GUT_GENOME066754	GUT_GENOME266759	88.9118	688	939	0.732694
GUT_GENOME066754	GUT_GENOME116467	87.8704	642	939	0.683706
GUT_GENOME066754	GUT_GENOME070238	87.7782	605	939	0.644302
GUT_GENOME271895	GUT_GENOME209369	98.9284	749	849	0.882214
GUT_GENOME271895	GUT_GENOME007205	98.8688	751	849	0.88457
GUT_GENOME271895	GUT_GENOME116561	98.809	765	849	0.90106
GUT_GENOME271895	GUT_GENOME117486	98.7474	762	849	0.897527
GUT_GENOME271895	GUT_GENOME016657	98.6493	702	849	0.826855
GUT_GENOME271895	GUT_GENOME178562	97.9518	720	849	0.848057
GUT_GENOME271895	GUT_GENOME134342	94.5863	678	849	0.798587
GUT_GENOME271895	GUT_GENOME007468	94.5815	698	849	0.822144
GUT_GENOME271895	GUT_GENOME114128	94.5529	701	849	0.825677
GUT_GENOME271895	GUT_GENOME023119	94.5433	700	849	0.824499
GUT_GENOME271895	GUT_GENOME081229	94.4768	667	849	0.78563
GUT_GENOME271895	GUT_GENOME135134	94.3894	682	849	0.803298
GUT_GENOME271895	GUT_GENOME052950	94.3441	649	849	0.764429
GUT_GENOME271895	GUT_GENOME216494	94.3093	667	849	0.78563
GUT_GENOME271895	GUT_GENOME001864	94.2847	684	849	0.805654
GUT_GENOME271895	GUT_GENOME154601	94.2744	679	849	0.799764
GUT_GENOME271895	GUT_GENOME255327	94.2459	684	849	0.805654
GUT_GENOME271895	GUT_GENOME151433	94.2439	681	849	0.80212
GUT_GENOME271895	GUT_GENOME152168	94.2368	700	849	0.824499
GUT_GENOME271895	GUT_GENOME113260	94.1644	695	849	0.81861
GUT_GENOME271895	GUT_GENOME000911	94.1404	717	849	0.844523
GUT_GENOME271895	GUT_GENOME034920	94.1393	672	849	0.791519
GUT_GENOME271895	GUT_GENOME104328	94.1182	662	849	0.779741
GUT_GENOME271895	GUT_GENOME034785	94.038	618	849	0.727915
GUT_GENOME080904	GUT_GENOME082868	98.564	783	995	0.786935
GUT_GENOME080904	GUT_GENOME228470	98.5404	831	995	0.835176
GUT_GENOME080904	GUT_GENOME148080	98.5138	834	995	0.838191
GUT_GENOME080904	GUT_GENOME255937	98.5005	843	995	0.847236
GUT_GENOME080904	GUT_GENOME250382	98.481	816	995	0.820101
GUT_GENOME080904	GUT_GENOME114896	98.4734	847	995	0.851256
GUT_GENOME080904	GUT_GENOME022435	98.422	767	995	0.770854
GUT_GENOME080904	GUT_GENOME040647	98.4211	791	995	0.794975
GUT_GENOME080904	GUT_GENOME283661	98.421	816	995	0.820101
GUT_GENOME080904	GUT_GENOME284371	98.418	842	995	0.846231
GUT_GENOME080904	GUT_GENOME112073	98.4158	812	995	0.81608
GUT_GENOME080904	GUT_GENOME237017	98.4075	847	995	0.851256
GUT_GENOME080904	GUT_GENOME079065	98.3963	778	995	0.78191
GUT_GENOME080904	GUT_GENOME100934	98.3897	835	995	0.839196
GUT_GENOME080904	GUT_GENOME024044	98.3886	840	995	0.844221
GUT_GENOME080904	GUT_GENOME261056	98.3576	847	995	0.851256
GUT_GENOME080904	GUT_GENOME280050	98.3564	835	995	0.839196
GUT_GENOME080904	GUT_GENOME056667	98.3423	783	995	0.786935
GUT_GENOME080904	GUT_GENOME059925	98.3378	831	995	0.835176
GUT_GENOME080904	GUT_GENOME194478	98.3351	801	995	0.805025
GUT_GENOME080904	GUT_GENOME268679	98.3346	752	995	0.755779
GUT_GENOME080904	GUT_GENOME197978	98.3272	793	995	0.796985
GUT_GENOME080904	GUT_GENOME203567	98.3139	827	995	0.831156
GUT_GENOME080904	GUT_GENOME077038	98.3102	799	995	0.803015
GUT_GENOME080904	GUT_GENOME272604	98.3063	774	995	0.777889
GUT_GENOME080904	GUT_GENOME025391	98.3022	842	995	0.846231
GUT_GENOME080904	GUT_GENOME020289	98.2909	818	995	0.822111
GUT_GENOME080904	GUT_GENOME000977	98.2582	859	995	0.863317
GUT_GENOME080904	GUT_GENOME004204	98.2568	822	995	0.826131
GUT_GENOME080904	GUT_GENOME000172	98.2541	859	995	0.863317
GUT_GENOME080904	GUT_GENOME245153	98.2444	820	995	0.824121
GUT_GENOME080904	GUT_GENOME256352	98.236	832	995	0.836181
GUT_GENOME080904	GUT_GENOME004475	98.2253	673	995	0.676382
GUT_GENOME080904	GUT_GENOME070705	98.2228	693	995	0.696482
GUT_GENOME080904	GUT_GENOME044157	98.2087	733	995	0.736683
GUT_GENOME080904	GUT_GENOME008526	98.2062	758	995	0.761809
GUT_GENOME080904	GUT_GENOME164892	98.1907	734	995	0.737688
GUT_GENOME080904	GUT_GENOME259926	98.1659	857	995	0.861307
GUT_GENOME080904	GUT_GENOME017328	98.1477	801	995	0.805025
GUT_GENOME080904	GUT_GENOME234468	98.1331	790	995	0.79397
GUT_GENOME080904	GUT_GENOME199294	97.9867	800	995	0.80402
GUT_GENOME080904	GUT_GENOME039234	88.7902	647	995	0.650251
GUT_GENOME080904	GUT_GENOME266759	88.7394	680	995	0.683417
GUT_GENOME080904	GUT_GENOME011904	88.6916	618	995	0.621106
GUT_GENOME080904	GUT_GENOME023277	88.6674	658	995	0.661307
GUT_GENOME080904	GUT_GENOME272961	88.6075	680	995	0.683417
GUT_GENOME080904	GUT_GENOME252536	88.6025	688	995	0.691457
GUT_GENOME080904	GUT_GENOME269593	88.5202	674	995	0.677387
GUT_GENOME080904	GUT_GENOME070238	87.9608	584	995	0.586935
GUT_GENOME080904	GUT_GENOME116467	87.8756	637	995	0.640201
GUT_GENOME103847	GUT_GENOME007205	99.139	771	974	0.791581
GUT_GENOME103847	GUT_GENOME116561	98.779	775	974	0.795688
GUT_GENOME103847	GUT_GENOME117486	98.7481	762	974	0.782341
GUT_GENOME103847	GUT_GENOME209369	98.6767	769	974	0.789528
GUT_GENOME103847	GUT_GENOME016657	98.5625	727	974	0.746407
GUT_GENOME103847	GUT_GENOME178562	97.8873	719	974	0.738193
GUT_GENOME103847	GUT_GENOME134342	94.5325	698	974	0.716632
GUT_GENOME103847	GUT_GENOME135134	94.5154	685	974	0.703285
GUT_GENOME103847	GUT_GENOME114128	94.5061	706	974	0.724846
GUT_GENOME103847	GUT_GENOME023119	94.4979	723	974	0.7423
GUT_GENOME103847	GUT_GENOME007468	94.4786	721	974	0.740246
GUT_GENOME103847	GUT_GENOME081229	94.4212	684	974	0.702259
GUT_GENOME103847	GUT_GENOME052950	94.2831	652	974	0.669405
GUT_GENOME103847	GUT_GENOME000911	94.2501	759	974	0.779261
GUT_GENOME103847	GUT_GENOME001864	94.2476	728	974	0.747433
GUT_GENOME103847	GUT_GENOME154601	94.242	701	974	0.719713
GUT_GENOME103847	GUT_GENOME104328	94.2165	671	974	0.688912
GUT_GENOME103847	GUT_GENOME151433	94.1773	705	974	0.723819
GUT_GENOME103847	GUT_GENOME216494	94.1731	687	974	0.705339
GUT_GENOME103847	GUT_GENOME255327	94.1438	696	974	0.714579
GUT_GENOME103847	GUT_GENOME034920	94.1287	679	974	0.697125
GUT_GENOME103847	GUT_GENOME113260	94.1136	706	974	0.724846
GUT_GENOME103847	GUT_GENOME152168	94.0588	719	974	0.738193
GUT_GENOME103847	GUT_GENOME034785	93.9909	618	974	0.634497
GUT_GENOME111414	GUT_GENOME007205	99.0022	746	863	0.864426
GUT_GENOME111414	GUT_GENOME116561	98.8916	765	863	0.886443
GUT_GENOME111414	GUT_GENOME117486	98.8876	754	863	0.873696
GUT_GENOME111414	GUT_GENOME209369	98.8629	751	863	0.87022
GUT_GENOME111414	GUT_GENOME016657	98.6501	710	863	0.822711
GUT_GENOME111414	GUT_GENOME178562	98.0214	721	863	0.835458
GUT_GENOME111414	GUT_GENOME114128	94.5328	708	863	0.820394
GUT_GENOME111414	GUT_GENOME023119	94.4925	710	863	0.822711
GUT_GENOME111414	GUT_GENOME134342	94.4432	682	863	0.790267
GUT_GENOME111414	GUT_GENOME135134	94.4095	682	863	0.790267
GUT_GENOME111414	GUT_GENOME052950	94.3357	640	863	0.741599
GUT_GENOME111414	GUT_GENOME007468	94.2897	706	863	0.818076
GUT_GENOME111414	GUT_GENOME255327	94.2584	691	863	0.800695
GUT_GENOME111414	GUT_GENOME081229	94.2564	687	863	0.79606
GUT_GENOME111414	GUT_GENOME216494	94.2525	677	863	0.784473
GUT_GENOME111414	GUT_GENOME001864	94.2475	691	863	0.800695
GUT_GENOME111414	GUT_GENOME154601	94.2388	697	863	0.807648
GUT_GENOME111414	GUT_GENOME000911	94.2036	709	863	0.821553
GUT_GENOME111414	GUT_GENOME151433	94.1974	680	863	0.787949
GUT_GENOME111414	GUT_GENOME104328	94.196	657	863	0.761298
GUT_GENOME111414	GUT_GENOME034920	94.1936	661	863	0.765933
GUT_GENOME111414	GUT_GENOME152168	94.0913	710	863	0.822711
GUT_GENOME111414	GUT_GENOME113260	94.0657	690	863	0.799537
GUT_GENOME111414	GUT_GENOME034785	94.0106	613	863	0.710313
GUT_GENOME075245	GUT_GENOME267997	97.8624	589	798	0.738095
GUT_GENOME010860	GUT_GENOME114896	98.982	868	948	0.915612
GUT_GENOME010860	GUT_GENOME194478	98.8812	824	948	0.869198
GUT_GENOME010860	GUT_GENOME268679	98.8567	743	948	0.783755
GUT_GENOME010860	GUT_GENOME077038	98.8529	809	948	0.853376
GUT_GENOME010860	GUT_GENOME280050	98.8428	841	948	0.887131
GUT_GENOME010860	GUT_GENOME284371	98.8369	846	948	0.892405
GUT_GENOME010860	GUT_GENOME079065	98.8251	794	948	0.837553
GUT_GENOME010860	GUT_GENOME022435	98.8109	774	948	0.816456
GUT_GENOME010860	GUT_GENOME255937	98.8098	858	948	0.905063
GUT_GENOME010860	GUT_GENOME004204	98.807	841	948	0.887131
GUT_GENOME010860	GUT_GENOME059925	98.784	840	948	0.886076
GUT_GENOME010860	GUT_GENOME008526	98.7668	768	948	0.810127
GUT_GENOME010860	GUT_GENOME203567	98.7572	832	948	0.877637
GUT_GENOME010860	GUT_GENOME237017	98.7555	858	948	0.905063
GUT_GENOME010860	GUT_GENOME272604	98.7335	790	948	0.833333
GUT_GENOME010860	GUT_GENOME259926	98.7334	861	948	0.908228
GUT_GENOME010860	GUT_GENOME283661	98.7321	835	948	0.880802
GUT_GENOME010860	GUT_GENOME056667	98.7291	787	948	0.830169
GUT_GENOME010860	GUT_GENOME197978	98.7148	815	948	0.859705
GUT_GENOME010860	GUT_GENOME020289	98.7067	817	948	0.861814
GUT_GENOME010860	GUT_GENOME261056	98.7052	861	948	0.908228
GUT_GENOME010860	GUT_GENOME024044	98.7033	844	948	0.890295
GUT_GENOME010860	GUT_GENOME164892	98.697	750	948	0.791139
GUT_GENOME010860	GUT_GENOME000172	98.678	881	948	0.929325
GUT_GENOME010860	GUT_GENOME025391	98.6753	845	948	0.89135
GUT_GENOME010860	GUT_GENOME245153	98.6578	836	948	0.881857
GUT_GENOME010860	GUT_GENOME112073	98.6512	824	948	0.869198
GUT_GENOME010860	GUT_GENOME256352	98.6391	841	948	0.887131
GUT_GENOME010860	GUT_GENOME040647	98.617	811	948	0.855485
GUT_GENOME010860	GUT_GENOME004475	98.5964	688	948	0.725738
GUT_GENOME010860	GUT_GENOME100934	98.5877	849	948	0.89557
GUT_GENOME010860	GUT_GENOME070705	98.5787	702	948	0.740506
GUT_GENOME010860	GUT_GENOME044157	98.5624	767	948	0.809072
GUT_GENOME010860	GUT_GENOME082868	98.3911	790	948	0.833333
GUT_GENOME010860	GUT_GENOME148080	98.3524	825	948	0.870253
GUT_GENOME010860	GUT_GENOME199294	98.3233	807	948	0.851266
GUT_GENOME010860	GUT_GENOME228470	98.1859	822	948	0.867089
GUT_GENOME010860	GUT_GENOME250382	98.1859	814	948	0.85865
GUT_GENOME010860	GUT_GENOME234468	97.8135	789	948	0.832278
GUT_GENOME010860	GUT_GENOME017328	97.7952	796	948	0.839662
GUT_GENOME010860	GUT_GENOME000977	97.7458	850	948	0.896624
GUT_GENOME010860	GUT_GENOME272961	88.8768	684	948	0.721519
GUT_GENOME010860	GUT_GENOME266759	88.8426	687	948	0.724684
GUT_GENOME010860	GUT_GENOME023277	88.8167	638	948	0.672996
GUT_GENOME010860	GUT_GENOME039234	88.7434	659	948	0.695148
GUT_GENOME010860	GUT_GENOME252536	88.7311	678	948	0.71519
GUT_GENOME010860	GUT_GENOME269593	88.6908	671	948	0.707806
GUT_GENOME010860	GUT_GENOME011904	88.6452	627	948	0.661392
GUT_GENOME010860	GUT_GENOME116467	88.0008	634	948	0.668776
GUT_GENOME010860	GUT_GENOME070238	87.8115	609	948	0.642405
GUT_GENOME038038	GUT_GENOME082868	98.6308	778	921	0.844734
GUT_GENOME038038	GUT_GENOME228470	98.6069	805	921	0.87405
GUT_GENOME038038	GUT_GENOME148080	98.5624	816	921	0.885993
GUT_GENOME038038	GUT_GENOME079065	98.5435	775	921	0.841477
GUT_GENOME038038	GUT_GENOME250382	98.535	814	921	0.883822
GUT_GENOME038038	GUT_GENOME040647	98.5079	786	921	0.85342
GUT_GENOME038038	GUT_GENOME112073	98.5056	810	921	0.879479
GUT_GENOME038038	GUT_GENOME237017	98.4641	837	921	0.908795
GUT_GENOME038038	GUT_GENOME194478	98.457	791	921	0.858849
GUT_GENOME038038	GUT_GENOME261056	98.4429	832	921	0.903366
GUT_GENOME038038	GUT_GENOME197978	98.4369	792	921	0.859935
GUT_GENOME038038	GUT_GENOME077038	98.4326	781	921	0.847991
GUT_GENOME038038	GUT_GENOME272604	98.4274	785	921	0.852334
GUT_GENOME038038	GUT_GENOME056667	98.4235	769	921	0.834962
GUT_GENOME038038	GUT_GENOME024044	98.418	823	921	0.893594
GUT_GENOME038038	GUT_GENOME284371	98.4175	825	921	0.895765
GUT_GENOME038038	GUT_GENOME268679	98.4156	730	921	0.792617
GUT_GENOME038038	GUT_GENOME100934	98.4055	826	921	0.896851
GUT_GENOME038038	GUT_GENOME059925	98.3982	828	921	0.899023
GUT_GENOME038038	GUT_GENOME255937	98.3876	839	921	0.910966
GUT_GENOME038038	GUT_GENOME020289	98.3836	800	921	0.868621
GUT_GENOME038038	GUT_GENOME004204	98.3806	803	921	0.871878
GUT_GENOME038038	GUT_GENOME203567	98.3742	808	921	0.877307
GUT_GENOME038038	GUT_GENOME025391	98.3625	835	921	0.906623
GUT_GENOME038038	GUT_GENOME000172	98.362	850	921	0.92291
GUT_GENOME038038	GUT_GENOME114896	98.3605	836	921	0.907709
GUT_GENOME038038	GUT_GENOME022435	98.3395	759	921	0.824104
GUT_GENOME038038	GUT_GENOME283661	98.3371	808	921	0.877307
GUT_GENOME038038	GUT_GENOME256352	98.3335	822	921	0.892508
GUT_GENOME038038	GUT_GENOME280050	98.3313	822	921	0.892508
GUT_GENOME038038	GUT_GENOME259926	98.3233	843	921	0.915309
GUT_GENOME038038	GUT_GENOME164892	98.3193	726	921	0.788274
GUT_GENOME038038	GUT_GENOME000977	98.3101	832	921	0.903366
GUT_GENOME038038	GUT_GENOME245153	98.2791	807	921	0.876221
GUT_GENOME038038	GUT_GENOME004475	98.2352	681	921	0.739414
GUT_GENOME038038	GUT_GENOME234468	98.2255	770	921	0.836048
GUT_GENOME038038	GUT_GENOME008526	98.2232	754	921	0.818675
GUT_GENOME038038	GUT_GENOME070705	98.1929	685	921	0.743757
GUT_GENOME038038	GUT_GENOME017328	98.1887	780	921	0.846906
GUT_GENOME038038	GUT_GENOME044157	98.1871	741	921	0.80456
GUT_GENOME038038	GUT_GENOME199294	98.1466	804	921	0.872964
GUT_GENOME038038	GUT_GENOME252536	88.8244	660	921	0.716612
GUT_GENOME038038	GUT_GENOME023277	88.8078	642	921	0.697068
GUT_GENOME038038	GUT_GENOME266759	88.7683	666	921	0.723127
GUT_GENOME038038	GUT_GENOME011904	88.7648	611	921	0.663409
GUT_GENOME038038	GUT_GENOME039234	88.7316	648	921	0.703583
GUT_GENOME038038	GUT_GENOME272961	88.6288	660	921	0.716612
GUT_GENOME038038	GUT_GENOME269593	88.6261	653	921	0.709012
GUT_GENOME038038	GUT_GENOME116467	87.7264	636	921	0.690554
GUT_GENOME038038	GUT_GENOME070238	87.6799	600	921	0.651466
GUT_GENOME170568	GUT_GENOME199294	96.1411	802	957	0.838036
GUT_GENOME170568	GUT_GENOME194478	96.1117	757	957	0.791014
GUT_GENOME170568	GUT_GENOME079065	96.0595	741	957	0.774295
GUT_GENOME170568	GUT_GENOME280050	96.0111	788	957	0.823406
GUT_GENOME170568	GUT_GENOME022435	95.9928	738	957	0.77116
GUT_GENOME170568	GUT_GENOME272604	95.9882	738	957	0.77116
GUT_GENOME170568	GUT_GENOME082868	95.9718	740	957	0.77325
GUT_GENOME170568	GUT_GENOME100934	95.9717	784	957	0.819227
GUT_GENOME170568	GUT_GENOME077038	95.9669	753	957	0.786834
GUT_GENOME170568	GUT_GENOME112073	95.9579	772	957	0.806688
GUT_GENOME170568	GUT_GENOME040647	95.9569	763	957	0.797283
GUT_GENOME170568	GUT_GENOME255937	95.9387	789	957	0.824451
GUT_GENOME170568	GUT_GENOME228470	95.9348	761	957	0.795193
GUT_GENOME170568	GUT_GENOME256352	95.9171	784	957	0.819227
GUT_GENOME170568	GUT_GENOME024044	95.913	803	957	0.83908
GUT_GENOME170568	GUT_GENOME245153	95.9065	783	957	0.818182
GUT_GENOME170568	GUT_GENOME284371	95.9053	788	957	0.823406
GUT_GENOME170568	GUT_GENOME203567	95.8987	770	957	0.804598
GUT_GENOME170568	GUT_GENOME025391	95.898	805	957	0.84117
GUT_GENOME170568	GUT_GENOME259926	95.8967	807	957	0.84326
GUT_GENOME170568	GUT_GENOME261056	95.8939	795	957	0.830721
GUT_GENOME170568	GUT_GENOME283661	95.8937	779	957	0.814002
GUT_GENOME170568	GUT_GENOME056667	95.8915	737	957	0.770115
GUT_GENOME170568	GUT_GENOME237017	95.8823	809	957	0.84535
GUT_GENOME170568	GUT_GENOME020289	95.8711	782	957	0.817137
GUT_GENOME170568	GUT_GENOME234468	95.8699	749	957	0.782654
GUT_GENOME170568	GUT_GENOME044157	95.8561	712	957	0.743992
GUT_GENOME170568	GUT_GENOME114896	95.8453	797	957	0.832811
GUT_GENOME170568	GUT_GENOME004204	95.8446	788	957	0.823406
GUT_GENOME170568	GUT_GENOME000172	95.8399	818	957	0.854754
GUT_GENOME170568	GUT_GENOME148080	95.8373	793	957	0.828631
GUT_GENOME170568	GUT_GENOME250382	95.8248	775	957	0.809822
GUT_GENOME170568	GUT_GENOME059925	95.8209	788	957	0.823406
GUT_GENOME170568	GUT_GENOME000977	95.8196	809	957	0.84535
GUT_GENOME170568	GUT_GENOME017328	95.816	768	957	0.802508
GUT_GENOME170568	GUT_GENOME004475	95.7906	660	957	0.689655
GUT_GENOME170568	GUT_GENOME268679	95.7845	690	957	0.721003
GUT_GENOME170568	GUT_GENOME008526	95.7839	728	957	0.760711
GUT_GENOME170568	GUT_GENOME164892	95.7568	714	957	0.746082
GUT_GENOME170568	GUT_GENOME070705	95.7344	657	957	0.68652
GUT_GENOME170568	GUT_GENOME197978	95.7149	756	957	0.789969
GUT_GENOME170568	GUT_GENOME039234	88.2514	629	957	0.657262
GUT_GENOME170568	GUT_GENOME269593	88.1596	640	957	0.668757
GUT_GENOME170568	GUT_GENOME266759	88.0722	662	957	0.691745
GUT_GENOME170568	GUT_GENOME252536	88.035	646	957	0.675026
GUT_GENOME170568	GUT_GENOME011904	88.0241	609	957	0.636364
GUT_GENOME170568	GUT_GENOME272961	87.9922	657	957	0.68652
GUT_GENOME170568	GUT_GENOME023277	87.973	620	957	0.647858
GUT_GENOME170568	GUT_GENOME070238	87.1098	592	957	0.6186
GUT_GENOME170568	GUT_GENOME116467	87.0736	640	957	0.668757
GUT_GENOME012713	GUT_GENOME194478	98.5677	801	971	0.824923
GUT_GENOME012713	GUT_GENOME280050	98.5321	838	971	0.863028
GUT_GENOME012713	GUT_GENOME079065	98.5159	795	971	0.818744
GUT_GENOME012713	GUT_GENOME114896	98.4968	852	971	0.877446
GUT_GENOME012713	GUT_GENOME284371	98.4641	839	971	0.864058
GUT_GENOME012713	GUT_GENOME059925	98.4587	833	971	0.857878
GUT_GENOME012713	GUT_GENOME255937	98.4488	845	971	0.870237
GUT_GENOME012713	GUT_GENOME261056	98.4294	846	971	0.871267
GUT_GENOME012713	GUT_GENOME077038	98.4288	797	971	0.820803
GUT_GENOME012713	GUT_GENOME237017	98.4237	855	971	0.880536
GUT_GENOME012713	GUT_GENOME056667	98.4216	785	971	0.808445
GUT_GENOME012713	GUT_GENOME203567	98.4172	826	971	0.850669
GUT_GENOME012713	GUT_GENOME268679	98.4145	752	971	0.774459
GUT_GENOME012713	GUT_GENOME025391	98.4053	849	971	0.874356
GUT_GENOME012713	GUT_GENOME259926	98.3825	860	971	0.885685
GUT_GENOME012713	GUT_GENOME197978	98.3824	804	971	0.828012
GUT_GENOME012713	GUT_GENOME024044	98.3784	853	971	0.878476
GUT_GENOME012713	GUT_GENOME256352	98.375	833	971	0.857878
GUT_GENOME012713	GUT_GENOME022435	98.3669	767	971	0.789907
GUT_GENOME012713	GUT_GENOME004204	98.3659	833	971	0.857878
GUT_GENOME012713	GUT_GENOME040647	98.3658	798	971	0.821833
GUT_GENOME012713	GUT_GENOME112073	98.3616	825	971	0.84964
GUT_GENOME012713	GUT_GENOME020289	98.3601	831	971	0.855819
GUT_GENOME012713	GUT_GENOME008526	98.3565	763	971	0.785788
GUT_GENOME012713	GUT_GENOME272604	98.356	798	971	0.821833
GUT_GENOME012713	GUT_GENOME100934	98.3449	848	971	0.873326
GUT_GENOME012713	GUT_GENOME283661	98.3287	821	971	0.84552
GUT_GENOME012713	GUT_GENOME164892	98.3219	741	971	0.763131
GUT_GENOME012713	GUT_GENOME000172	98.3033	872	971	0.898043
GUT_GENOME012713	GUT_GENOME082868	98.2731	778	971	0.801236
GUT_GENOME012713	GUT_GENOME245153	98.2396	833	971	0.857878
GUT_GENOME012713	GUT_GENOME044157	98.2391	753	971	0.775489
GUT_GENOME012713	GUT_GENOME004475	98.2222	693	971	0.713697
GUT_GENOME012713	GUT_GENOME199294	98.2065	820	971	0.84449
GUT_GENOME012713	GUT_GENOME070705	98.192	701	971	0.721936
GUT_GENOME012713	GUT_GENOME148080	98.1359	825	971	0.84964
GUT_GENOME012713	GUT_GENOME228470	98.0037	807	971	0.831102
GUT_GENOME012713	GUT_GENOME250382	97.9341	810	971	0.834192
GUT_GENOME012713	GUT_GENOME234468	97.9285	774	971	0.797116
GUT_GENOME012713	GUT_GENOME000977	97.8609	852	971	0.877446
GUT_GENOME012713	GUT_GENOME017328	97.8	800	971	0.823893
GUT_GENOME012713	GUT_GENOME266759	88.9283	690	971	0.710608
GUT_GENOME012713	GUT_GENOME039234	88.8484	648	971	0.667353
GUT_GENOME012713	GUT_GENOME252536	88.8298	682	971	0.702369
GUT_GENOME012713	GUT_GENOME023277	88.8277	657	971	0.676622
GUT_GENOME012713	GUT_GENOME011904	88.8001	638	971	0.657055
GUT_GENOME012713	GUT_GENOME272961	88.7698	685	971	0.705458
GUT_GENOME012713	GUT_GENOME269593	88.567	675	971	0.69516
GUT_GENOME012713	GUT_GENOME070238	87.6064	600	971	0.61792
GUT_GENOME012713	GUT_GENOME116467	87.5882	648	971	0.667353
GUT_GENOME210107	GUT_GENOME100934	99.1739	782	871	0.897819
GUT_GENOME210107	GUT_GENOME259926	98.7324	781	871	0.89667
GUT_GENOME210107	GUT_GENOME079065	98.7236	720	871	0.826636
GUT_GENOME210107	GUT_GENOME000172	98.7072	801	871	0.919633
GUT_GENOME210107	GUT_GENOME040647	98.7045	739	871	0.84845
GUT_GENOME210107	GUT_GENOME077038	98.703	720	871	0.826636
GUT_GENOME210107	GUT_GENOME194478	98.6577	733	871	0.841561
GUT_GENOME210107	GUT_GENOME255937	98.6534	762	871	0.874856
GUT_GENOME210107	GUT_GENOME059925	98.6403	780	871	0.895522
GUT_GENOME210107	GUT_GENOME056667	98.6332	716	871	0.822044
GUT_GENOME210107	GUT_GENOME112073	98.6323	749	871	0.859931
GUT_GENOME210107	GUT_GENOME004204	98.6308	754	871	0.865672
GUT_GENOME210107	GUT_GENOME245153	98.6291	756	871	0.867968
GUT_GENOME210107	GUT_GENOME237017	98.6285	775	871	0.889782
GUT_GENOME210107	GUT_GENOME261056	98.6281	775	871	0.889782
GUT_GENOME210107	GUT_GENOME203567	98.6267	750	871	0.861079
GUT_GENOME210107	GUT_GENOME256352	98.6131	764	871	0.877153
GUT_GENOME210107	GUT_GENOME164892	98.6102	698	871	0.801378
GUT_GENOME210107	GUT_GENOME114896	98.6075	765	871	0.878301
GUT_GENOME210107	GUT_GENOME268679	98.5914	698	871	0.801378
GUT_GENOME210107	GUT_GENOME272604	98.589	725	871	0.832377
GUT_GENOME210107	GUT_GENOME197978	98.5815	735	871	0.843858
GUT_GENOME210107	GUT_GENOME284371	98.5772	766	871	0.879449
GUT_GENOME210107	GUT_GENOME022435	98.5631	716	871	0.822044
GUT_GENOME210107	GUT_GENOME024044	98.5584	768	871	0.881745
GUT_GENOME210107	GUT_GENOME025391	98.5561	780	871	0.895522
GUT_GENOME210107	GUT_GENOME283661	98.5523	742	871	0.851894
GUT_GENOME210107	GUT_GENOME044157	98.5094	697	871	0.80023
GUT_GENOME210107	GUT_GENOME280050	98.4887	752	871	0.863375
GUT_GENOME210107	GUT_GENOME004475	98.4676	652	871	0.748565
GUT_GENOME210107	GUT_GENOME020289	98.4485	754	871	0.865672
GUT_GENOME210107	GUT_GENOME008526	98.4463	693	871	0.795637
GUT_GENOME210107	GUT_GENOME070705	98.4081	658	871	0.755454
GUT_GENOME210107	GUT_GENOME082868	98.3652	715	871	0.820896
GUT_GENOME210107	GUT_GENOME199294	98.3191	750	871	0.861079
GUT_GENOME210107	GUT_GENOME148080	98.1867	761	871	0.873708
GUT_GENOME210107	GUT_GENOME250382	98.1636	736	871	0.845006
GUT_GENOME210107	GUT_GENOME228470	98.1371	730	871	0.838117
GUT_GENOME210107	GUT_GENOME000977	97.8669	768	871	0.881745
GUT_GENOME210107	GUT_GENOME234468	97.8542	707	871	0.811711
GUT_GENOME210107	GUT_GENOME017328	97.8305	723	871	0.83008
GUT_GENOME210107	GUT_GENOME039234	88.9807	597	871	0.685419
GUT_GENOME210107	GUT_GENOME023277	88.9304	593	871	0.680827
GUT_GENOME210107	GUT_GENOME266759	88.8665	623	871	0.71527
GUT_GENOME210107	GUT_GENOME252536	88.7793	616	871	0.707233
GUT_GENOME210107	GUT_GENOME272961	88.73	611	871	0.701493
GUT_GENOME210107	GUT_GENOME011904	88.6799	569	871	0.653272
GUT_GENOME210107	GUT_GENOME269593	88.6728	611	871	0.701493
GUT_GENOME210107	GUT_GENOME070238	87.8328	547	871	0.628014
GUT_GENOME210107	GUT_GENOME116467	87.8194	580	871	0.665901
GUT_GENOME000253	GUT_GENOME267997	97.3125	671	1123	0.597507
GUT_GENOME014339	GUT_GENOME007205	98.7703	719	789	0.91128
GUT_GENOME014339	GUT_GENOME116561	98.7176	726	789	0.920152
GUT_GENOME014339	GUT_GENOME117486	98.698	722	789	0.915082
GUT_GENOME014339	GUT_GENOME016657	98.6441	669	789	0.847909
GUT_GENOME014339	GUT_GENOME209369	98.6332	727	789	0.92142
GUT_GENOME014339	GUT_GENOME178562	97.9768	702	789	0.889734
GUT_GENOME014339	GUT_GENOME114128	94.4058	677	789	0.858048
GUT_GENOME014339	GUT_GENOME134342	94.3877	663	789	0.840304
GUT_GENOME014339	GUT_GENOME007468	94.3792	674	789	0.854246
GUT_GENOME014339	GUT_GENOME023119	94.3206	681	789	0.863118
GUT_GENOME014339	GUT_GENOME081229	94.3007	650	789	0.823828
GUT_GENOME014339	GUT_GENOME135134	94.2945	653	789	0.82763
GUT_GENOME014339	GUT_GENOME216494	94.2156	653	789	0.82763
GUT_GENOME014339	GUT_GENOME000911	94.1834	683	789	0.865653
GUT_GENOME014339	GUT_GENOME151433	94.1562	669	789	0.847909
GUT_GENOME014339	GUT_GENOME113260	94.1225	668	789	0.846641
GUT_GENOME014339	GUT_GENOME104328	94.1206	646	789	0.818758
GUT_GENOME014339	GUT_GENOME052950	94.1123	629	789	0.797212
GUT_GENOME014339	GUT_GENOME034920	94.1098	638	789	0.808619
GUT_GENOME014339	GUT_GENOME152168	94.1072	677	789	0.858048
GUT_GENOME014339	GUT_GENOME255327	94.0802	657	789	0.8327
GUT_GENOME014339	GUT_GENOME001864	94.0769	670	789	0.849176
GUT_GENOME014339	GUT_GENOME154601	94.0184	679	789	0.860583
GUT_GENOME014339	GUT_GENOME034785	93.845	610	789	0.773131
GUT_GENOME022833	GUT_GENOME086676	99.2747	698	785	0.889172
GUT_GENOME022833	GUT_GENOME025615	99.203	713	785	0.90828
GUT_GENOME022833	GUT_GENOME015837	98.8109	703	785	0.895541
GUT_GENOME022833	GUT_GENOME161309	98.8097	557	785	0.709554
GUT_GENOME015824	GUT_GENOME025391	98.4962	832	899	0.925473
GUT_GENOME015824	GUT_GENOME114896	98.4682	836	899	0.929922
GUT_GENOME015824	GUT_GENOME261056	98.4638	830	899	0.923248
GUT_GENOME015824	GUT_GENOME020289	98.455	798	899	0.887653
GUT_GENOME015824	GUT_GENOME004204	98.4491	813	899	0.904338
GUT_GENOME015824	GUT_GENOME079065	98.4446	778	899	0.865406
GUT_GENOME015824	GUT_GENOME237017	98.4251	843	899	0.937709
GUT_GENOME015824	GUT_GENOME255937	98.4246	826	899	0.918799
GUT_GENOME015824	GUT_GENOME203567	98.4241	823	899	0.915462
GUT_GENOME015824	GUT_GENOME100934	98.4234	817	899	0.908788
GUT_GENOME015824	GUT_GENOME284371	98.422	826	899	0.918799
GUT_GENOME015824	GUT_GENOME272604	98.4194	775	899	0.862069
GUT_GENOME015824	GUT_GENOME194478	98.415	794	899	0.883204
GUT_GENOME015824	GUT_GENOME024044	98.4132	823	899	0.915462
GUT_GENOME015824	GUT_GENOME148080	98.4082	828	899	0.921023
GUT_GENOME015824	GUT_GENOME197978	98.399	790	899	0.878754
GUT_GENOME015824	GUT_GENOME059925	98.3892	822	899	0.914349
GUT_GENOME015824	GUT_GENOME082868	98.3733	770	899	0.856507
GUT_GENOME015824	GUT_GENOME283661	98.3573	799	899	0.888765
GUT_GENOME015824	GUT_GENOME056667	98.3537	760	899	0.845384
GUT_GENOME015824	GUT_GENOME077038	98.3535	789	899	0.877642
GUT_GENOME015824	GUT_GENOME040647	98.342	794	899	0.883204
GUT_GENOME015824	GUT_GENOME022435	98.3299	758	899	0.843159
GUT_GENOME015824	GUT_GENOME245153	98.3297	813	899	0.904338
GUT_GENOME015824	GUT_GENOME280050	98.3213	810	899	0.901001
GUT_GENOME015824	GUT_GENOME259926	98.3178	849	899	0.944383
GUT_GENOME015824	GUT_GENOME004475	98.3135	671	899	0.746385
GUT_GENOME015824	GUT_GENOME228470	98.3129	809	899	0.899889
GUT_GENOME015824	GUT_GENOME112073	98.3025	817	899	0.908788
GUT_GENOME015824	GUT_GENOME256352	98.2918	824	899	0.916574
GUT_GENOME015824	GUT_GENOME008526	98.2915	753	899	0.837597
GUT_GENOME015824	GUT_GENOME268679	98.2865	733	899	0.81535
GUT_GENOME015824	GUT_GENOME000172	98.2847	851	899	0.946607
GUT_GENOME015824	GUT_GENOME250382	98.2523	808	899	0.898776
GUT_GENOME015824	GUT_GENOME000977	98.2307	838	899	0.932147
GUT_GENOME015824	GUT_GENOME199294	98.2247	802	899	0.892102
GUT_GENOME015824	GUT_GENOME164892	98.2109	738	899	0.820912
GUT_GENOME015824	GUT_GENOME070705	98.2036	693	899	0.770857
GUT_GENOME015824	GUT_GENOME044157	98.2022	728	899	0.809789
GUT_GENOME015824	GUT_GENOME234468	98.1838	796	899	0.885428
GUT_GENOME015824	GUT_GENOME017328	98.1659	796	899	0.885428
GUT_GENOME015824	GUT_GENOME252536	88.6102	673	899	0.74861
GUT_GENOME015824	GUT_GENOME269593	88.5528	647	899	0.719689
GUT_GENOME015824	GUT_GENOME011904	88.552	619	899	0.688543
GUT_GENOME015824	GUT_GENOME039234	88.551	626	899	0.696329
GUT_GENOME015824	GUT_GENOME023277	88.5429	636	899	0.707453
GUT_GENOME015824	GUT_GENOME266759	88.5243	646	899	0.718576
GUT_GENOME015824	GUT_GENOME272961	88.3987	672	899	0.747497
GUT_GENOME015824	GUT_GENOME070238	87.8646	578	899	0.642937
GUT_GENOME015824	GUT_GENOME116467	87.855	618	899	0.68743
GUT_GENOME000112	GUT_GENOME004204	99.2441	862	1049	0.821735
GUT_GENOME000112	GUT_GENOME259926	98.7958	899	1049	0.857007
GUT_GENOME000112	GUT_GENOME255937	98.7887	865	1049	0.824595
GUT_GENOME000112	GUT_GENOME114896	98.7854	869	1049	0.828408
GUT_GENOME000112	GUT_GENOME022435	98.7663	773	1049	0.736892
GUT_GENOME000112	GUT_GENOME056667	98.7511	798	1049	0.760724
GUT_GENOME000112	GUT_GENOME059925	98.7479	859	1049	0.818875
GUT_GENOME000112	GUT_GENOME079065	98.7441	810	1049	0.772164
GUT_GENOME000112	GUT_GENOME194478	98.7388	827	1049	0.78837
GUT_GENOME000112	GUT_GENOME272604	98.7384	803	1049	0.765491
GUT_GENOME000112	GUT_GENOME256352	98.7346	872	1049	0.831268
GUT_GENOME000112	GUT_GENOME077038	98.7311	833	1049	0.79409
GUT_GENOME000112	GUT_GENOME284371	98.7247	855	1049	0.815062
GUT_GENOME000112	GUT_GENOME000172	98.7026	916	1049	0.873213
GUT_GENOME000112	GUT_GENOME268679	98.7009	763	1049	0.727359
GUT_GENOME000112	GUT_GENOME203567	98.6906	843	1049	0.803622
GUT_GENOME000112	GUT_GENOME283661	98.6902	838	1049	0.798856
GUT_GENOME000112	GUT_GENOME237017	98.6886	882	1049	0.840801
GUT_GENOME000112	GUT_GENOME261056	98.6861	858	1049	0.817922
GUT_GENOME000112	GUT_GENOME008526	98.6711	772	1049	0.735939
GUT_GENOME000112	GUT_GENOME197978	98.6654	806	1049	0.768351
GUT_GENOME000112	GUT_GENOME112073	98.6612	835	1049	0.795996
GUT_GENOME000112	GUT_GENOME100934	98.6358	853	1049	0.813155
GUT_GENOME000112	GUT_GENOME280050	98.6291	862	1049	0.821735
GUT_GENOME000112	GUT_GENOME025391	98.6281	863	1049	0.822688
GUT_GENOME000112	GUT_GENOME164892	98.6145	767	1049	0.731173
GUT_GENOME000112	GUT_GENOME024044	98.5681	856	1049	0.816015
GUT_GENOME000112	GUT_GENOME040647	98.5528	821	1049	0.78265
GUT_GENOME000112	GUT_GENOME245153	98.5527	865	1049	0.824595
GUT_GENOME000112	GUT_GENOME044157	98.5401	765	1049	0.729266
GUT_GENOME000112	GUT_GENOME020289	98.5286	837	1049	0.797903
GUT_GENOME000112	GUT_GENOME004475	98.4755	694	1049	0.661582
GUT_GENOME000112	GUT_GENOME070705	98.4119	723	1049	0.689228
GUT_GENOME000112	GUT_GENOME082868	98.3968	785	1049	0.748332
GUT_GENOME000112	GUT_GENOME199294	98.2081	820	1049	0.781697
GUT_GENOME000112	GUT_GENOME148080	98.1863	853	1049	0.813155
GUT_GENOME000112	GUT_GENOME228470	98.1059	830	1049	0.79123
GUT_GENOME000112	GUT_GENOME250382	98.072	819	1049	0.780744
GUT_GENOME000112	GUT_GENOME234468	97.8523	792	1049	0.755005
GUT_GENOME000112	GUT_GENOME017328	97.7959	799	1049	0.761678
GUT_GENOME000112	GUT_GENOME000977	97.6403	883	1049	0.841754
GUT_GENOME000112	GUT_GENOME266759	88.9943	704	1049	0.671115
GUT_GENOME000112	GUT_GENOME272961	88.9734	707	1049	0.673975
GUT_GENOME000112	GUT_GENOME023277	88.9344	660	1049	0.629171
GUT_GENOME000112	GUT_GENOME039234	88.8728	675	1049	0.64347
GUT_GENOME000112	GUT_GENOME269593	88.7973	689	1049	0.656816
GUT_GENOME000112	GUT_GENOME252536	88.7393	708	1049	0.674929
GUT_GENOME000112	GUT_GENOME011904	88.6211	639	1049	0.609152
GUT_GENOME000112	GUT_GENOME116467	87.9273	654	1049	0.623451
GUT_GENOME000112	GUT_GENOME070238	87.8447	618	1049	0.589133
GUT_GENOME209341	GUT_GENOME209369	99.9545	772	810	0.953086
GUT_GENOME209341	GUT_GENOME117486	98.7509	720	810	0.888889
GUT_GENOME209341	GUT_GENOME116561	98.7485	717	810	0.885185
GUT_GENOME209341	GUT_GENOME007205	98.6686	715	810	0.882716
GUT_GENOME209341	GUT_GENOME016657	98.6152	679	810	0.838272
GUT_GENOME209341	GUT_GENOME178562	98.0612	690	810	0.851852
GUT_GENOME209341	GUT_GENOME114128	94.6219	676	810	0.834568
GUT_GENOME209341	GUT_GENOME007468	94.5135	673	810	0.830864
GUT_GENOME209341	GUT_GENOME134342	94.5058	657	810	0.811111
GUT_GENOME209341	GUT_GENOME135134	94.4926	650	810	0.802469
GUT_GENOME209341	GUT_GENOME023119	94.4354	680	810	0.839506
GUT_GENOME209341	GUT_GENOME052950	94.3989	625	810	0.771605
GUT_GENOME209341	GUT_GENOME081229	94.3626	655	810	0.808642
GUT_GENOME209341	GUT_GENOME255327	94.3085	663	810	0.818519
GUT_GENOME209341	GUT_GENOME154601	94.291	664	810	0.819753
GUT_GENOME209341	GUT_GENOME216494	94.2644	648	810	0.8
GUT_GENOME209341	GUT_GENOME151433	94.2564	661	810	0.816049
GUT_GENOME209341	GUT_GENOME000911	94.2046	678	810	0.837037
GUT_GENOME209341	GUT_GENOME001864	94.2014	676	810	0.834568
GUT_GENOME209341	GUT_GENOME034920	94.175	642	810	0.792593
GUT_GENOME209341	GUT_GENOME113260	94.0833	668	810	0.824691
GUT_GENOME209341	GUT_GENOME104328	94.083	647	810	0.798765
GUT_GENOME209341	GUT_GENOME152168	94.0473	684	810	0.844444
GUT_GENOME209341	GUT_GENOME034785	93.9003	596	810	0.735802
GUT_GENOME015346	GUT_GENOME011904	98.4889	787	990	0.794949
GUT_GENOME015346	GUT_GENOME023277	98.4136	814	990	0.822222
GUT_GENOME015346	GUT_GENOME269593	98.3658	838	990	0.846465
GUT_GENOME015346	GUT_GENOME039234	98.352	829	990	0.837374
GUT_GENOME015346	GUT_GENOME266759	98.3398	869	990	0.877778
GUT_GENOME015346	GUT_GENOME272961	98.3325	854	990	0.862626
GUT_GENOME015346	GUT_GENOME252536	98.3235	848	990	0.856566
GUT_GENOME015346	GUT_GENOME259926	88.9109	668	990	0.674747
GUT_GENOME015346	GUT_GENOME197978	88.8927	633	990	0.639394
GUT_GENOME015346	GUT_GENOME059925	88.8663	655	990	0.661616
GUT_GENOME015346	GUT_GENOME056667	88.8621	623	990	0.629293
GUT_GENOME015346	GUT_GENOME268679	88.8354	613	990	0.619192
GUT_GENOME015346	GUT_GENOME272604	88.8101	643	990	0.649495
GUT_GENOME015346	GUT_GENOME283661	88.8012	645	990	0.651515
GUT_GENOME015346	GUT_GENOME022435	88.7575	605	990	0.611111
GUT_GENOME015346	GUT_GENOME044157	88.7456	607	990	0.613131
GUT_GENOME015346	GUT_GENOME000977	88.7412	695	990	0.70202
GUT_GENOME015346	GUT_GENOME024044	88.7354	681	990	0.687879
GUT_GENOME015346	GUT_GENOME004204	88.6982	654	990	0.660606
GUT_GENOME015346	GUT_GENOME000172	88.6883	686	990	0.692929
GUT_GENOME015346	GUT_GENOME112073	88.6848	648	990	0.654545
GUT_GENOME015346	GUT_GENOME040647	88.6815	632	990	0.638384
GUT_GENOME015346	GUT_GENOME261056	88.6719	684	990	0.690909
GUT_GENOME015346	GUT_GENOME070705	88.6676	574	990	0.579798
GUT_GENOME015346	GUT_GENOME280050	88.6565	647	990	0.653535
GUT_GENOME015346	GUT_GENOME100934	88.6537	675	990	0.681818
GUT_GENOME015346	GUT_GENOME255937	88.6463	685	990	0.691919
GUT_GENOME015346	GUT_GENOME114896	88.6426	684	990	0.690909
GUT_GENOME015346	GUT_GENOME082868	88.6252	622	990	0.628283
GUT_GENOME015346	GUT_GENOME148080	88.6102	663	990	0.669697
GUT_GENOME015346	GUT_GENOME199294	88.5933	661	990	0.667677
GUT_GENOME015346	GUT_GENOME284371	88.5916	677	990	0.683838
GUT_GENOME015346	GUT_GENOME025391	88.5908	684	990	0.690909
GUT_GENOME015346	GUT_GENOME237017	88.5813	689	990	0.69596
GUT_GENOME015346	GUT_GENOME250382	88.5539	661	990	0.667677
GUT_GENOME015346	GUT_GENOME020289	88.5082	666	990	0.672727
GUT_GENOME015346	GUT_GENOME256352	88.5057	669	990	0.675758
GUT_GENOME015346	GUT_GENOME203567	88.495	642	990	0.648485
GUT_GENOME015346	GUT_GENOME228470	88.4871	638	990	0.644444
GUT_GENOME015346	GUT_GENOME164892	88.461	596	990	0.60202
GUT_GENOME015346	GUT_GENOME008526	88.4415	617	990	0.623232
GUT_GENOME015346	GUT_GENOME017328	88.4348	623	990	0.629293
GUT_GENOME015346	GUT_GENOME245153	88.4038	668	990	0.674747
GUT_GENOME015346	GUT_GENOME077038	88.3616	644	990	0.650505
GUT_GENOME015346	GUT_GENOME194478	88.3292	638	990	0.644444
GUT_GENOME015346	GUT_GENOME004475	88.3119	576	990	0.581818
GUT_GENOME015346	GUT_GENOME234468	88.2395	628	990	0.634343
GUT_GENOME015346	GUT_GENOME079065	88.0777	638	990	0.644444
GUT_GENOME015346	GUT_GENOME070238	87.8633	575	990	0.580808
GUT_GENOME015346	GUT_GENOME116467	87.7305	621	990	0.627273
GUT_GENOME138175	GUT_GENOME070705	98.9017	689	940	0.732979
GUT_GENOME138175	GUT_GENOME194478	98.7494	772	940	0.821277
GUT_GENOME138175	GUT_GENOME077038	98.7425	775	940	0.824468
GUT_GENOME138175	GUT_GENOME000172	98.7326	850	940	0.904255
GUT_GENOME138175	GUT_GENOME261056	98.7169	808	940	0.859574
GUT_GENOME138175	GUT_GENOME203567	98.6942	802	940	0.853191
GUT_GENOME138175	GUT_GENOME255937	98.6929	824	940	0.876596
GUT_GENOME138175	GUT_GENOME245153	98.6745	803	940	0.854255
GUT_GENOME138175	GUT_GENOME237017	98.6719	825	940	0.87766
GUT_GENOME138175	GUT_GENOME056667	98.6628	751	940	0.798936
GUT_GENOME138175	GUT_GENOME059925	98.6616	804	940	0.855319
GUT_GENOME138175	GUT_GENOME256352	98.6452	821	940	0.873404
GUT_GENOME138175	GUT_GENOME022435	98.6436	729	940	0.775532
GUT_GENOME138175	GUT_GENOME197978	98.6365	763	940	0.811702
GUT_GENOME138175	GUT_GENOME079065	98.6327	761	940	0.809574
GUT_GENOME138175	GUT_GENOME004204	98.6315	803	940	0.854255
GUT_GENOME138175	GUT_GENOME008526	98.623	728	940	0.774468
GUT_GENOME138175	GUT_GENOME259926	98.6135	830	940	0.882979
GUT_GENOME138175	GUT_GENOME280050	98.6106	802	940	0.853191
GUT_GENOME138175	GUT_GENOME268679	98.6096	715	940	0.760638
GUT_GENOME138175	GUT_GENOME114896	98.5998	804	940	0.855319
GUT_GENOME138175	GUT_GENOME272604	98.5752	762	940	0.810638
GUT_GENOME138175	GUT_GENOME284371	98.5744	808	940	0.859574
GUT_GENOME138175	GUT_GENOME112073	98.5734	802	940	0.853191
GUT_GENOME138175	GUT_GENOME283661	98.5687	792	940	0.842553
GUT_GENOME138175	GUT_GENOME100934	98.5544	818	940	0.870213
GUT_GENOME138175	GUT_GENOME164892	98.5369	705	940	0.75
GUT_GENOME138175	GUT_GENOME025391	98.5327	828	940	0.880851
GUT_GENOME138175	GUT_GENOME044157	98.5323	727	940	0.773404
GUT_GENOME138175	GUT_GENOME024044	98.4803	808	940	0.859574
GUT_GENOME138175	GUT_GENOME040647	98.4613	770	940	0.819149
GUT_GENOME138175	GUT_GENOME004475	98.4415	656	940	0.697872
GUT_GENOME138175	GUT_GENOME020289	98.4294	800	940	0.851064
GUT_GENOME138175	GUT_GENOME082868	98.3625	748	940	0.795745
GUT_GENOME138175	GUT_GENOME148080	98.2347	799	940	0.85
GUT_GENOME138175	GUT_GENOME228470	98.1071	765	940	0.81383
GUT_GENOME138175	GUT_GENOME199294	98.0785	776	940	0.825532
GUT_GENOME138175	GUT_GENOME250382	98.0232	784	940	0.834043
GUT_GENOME138175	GUT_GENOME234468	97.7905	737	940	0.784043
GUT_GENOME138175	GUT_GENOME000977	97.6468	808	940	0.859574
GUT_GENOME138175	GUT_GENOME017328	97.5465	755	940	0.803191
GUT_GENOME138175	GUT_GENOME252536	89.3134	657	940	0.698936
GUT_GENOME138175	GUT_GENOME023277	89.2732	636	940	0.676596
GUT_GENOME138175	GUT_GENOME272961	89.1814	659	940	0.701064
GUT_GENOME138175	GUT_GENOME039234	89.1263	633	940	0.673404
GUT_GENOME138175	GUT_GENOME011904	89.1249	609	940	0.647872
GUT_GENOME138175	GUT_GENOME269593	89.0928	641	940	0.681915
GUT_GENOME138175	GUT_GENOME266759	89.0137	674	940	0.717021
GUT_GENOME138175	GUT_GENOME070238	88.1369	571	940	0.607447
GUT_GENOME138175	GUT_GENOME116467	87.9912	618	940	0.657447
GUT_GENOME192351	GUT_GENOME261056	98.8438	769	842	0.913302
GUT_GENOME192351	GUT_GENOME100934	98.756	752	842	0.893112
GUT_GENOME192351	GUT_GENOME056667	98.7202	701	842	0.832542
GUT_GENOME192351	GUT_GENOME197978	98.6681	716	842	0.850356
GUT_GENOME192351	GUT_GENOME059925	98.6613	753	842	0.894299
GUT_GENOME192351	GUT_GENOME000172	98.6448	781	842	0.927553
GUT_GENOME192351	GUT_GENOME259926	98.6412	762	842	0.904988
GUT_GENOME192351	GUT_GENOME025391	98.6397	759	842	0.901425
GUT_GENOME192351	GUT_GENOME077038	98.6245	758	842	0.900238
GUT_GENOME192351	GUT_GENOME255937	98.623	743	842	0.882423
GUT_GENOME192351	GUT_GENOME112073	98.6227	736	842	0.874109
GUT_GENOME192351	GUT_GENOME256352	98.6014	739	842	0.877672
GUT_GENOME192351	GUT_GENOME203567	98.5822	740	842	0.87886
GUT_GENOME192351	GUT_GENOME079065	98.5739	709	842	0.842043
GUT_GENOME192351	GUT_GENOME284371	98.5716	754	842	0.895487
GUT_GENOME192351	GUT_GENOME268679	98.5692	666	842	0.790974
GUT_GENOME192351	GUT_GENOME114896	98.5551	756	842	0.897862
GUT_GENOME192351	GUT_GENOME070705	98.5484	639	842	0.758907
GUT_GENOME192351	GUT_GENOME004475	98.5473	633	842	0.751781
GUT_GENOME192351	GUT_GENOME040647	98.5462	741	842	0.880048
GUT_GENOME192351	GUT_GENOME237017	98.5445	753	842	0.894299
GUT_GENOME192351	GUT_GENOME194478	98.5409	717	842	0.851544
GUT_GENOME192351	GUT_GENOME164892	98.5338	669	842	0.794537
GUT_GENOME192351	GUT_GENOME004204	98.5274	748	842	0.888361
GUT_GENOME192351	GUT_GENOME022435	98.5254	701	842	0.832542
GUT_GENOME192351	GUT_GENOME280050	98.5185	724	842	0.859857
GUT_GENOME192351	GUT_GENOME283661	98.5179	719	842	0.853919
GUT_GENOME192351	GUT_GENOME272604	98.5084	711	842	0.844418
GUT_GENOME192351	GUT_GENOME024044	98.4732	754	842	0.895487
GUT_GENOME192351	GUT_GENOME245153	98.4632	737	842	0.875297
GUT_GENOME192351	GUT_GENOME020289	98.4512	731	842	0.868171
GUT_GENOME192351	GUT_GENOME044157	98.4088	682	842	0.809976
GUT_GENOME192351	GUT_GENOME008526	98.3916	676	842	0.80285
GUT_GENOME192351	GUT_GENOME082868	98.3356	702	842	0.833729
GUT_GENOME192351	GUT_GENOME148080	98.1369	744	842	0.88361
GUT_GENOME192351	GUT_GENOME199294	98.0953	734	842	0.871734
GUT_GENOME192351	GUT_GENOME250382	98.0644	726	842	0.862233
GUT_GENOME192351	GUT_GENOME228470	98.0118	730	842	0.866983
GUT_GENOME192351	GUT_GENOME234468	97.7905	696	842	0.826603
GUT_GENOME192351	GUT_GENOME000977	97.734	760	842	0.902613
GUT_GENOME192351	GUT_GENOME017328	97.6043	723	842	0.85867
GUT_GENOME192351	GUT_GENOME023277	88.6536	573	842	0.680523
GUT_GENOME192351	GUT_GENOME272961	88.6419	597	842	0.709026
GUT_GENOME192351	GUT_GENOME266759	88.6043	610	842	0.724466
GUT_GENOME192351	GUT_GENOME039234	88.5557	585	842	0.694774
GUT_GENOME192351	GUT_GENOME252536	88.5195	601	842	0.713777
GUT_GENOME192351	GUT_GENOME011904	88.5062	564	842	0.669834
GUT_GENOME192351	GUT_GENOME269593	88.4937	586	842	0.695962
GUT_GENOME192351	GUT_GENOME070238	87.6171	537	842	0.637767
GUT_GENOME192351	GUT_GENOME116467	87.4837	581	842	0.690024
GUT_GENOME268800	GUT_GENOME077038	98.8946	711	795	0.89434
GUT_GENOME268800	GUT_GENOME114896	98.8591	736	795	0.925786
GUT_GENOME268800	GUT_GENOME079065	98.8432	700	795	0.880503
GUT_GENOME268800	GUT_GENOME237017	98.8237	747	795	0.939623
GUT_GENOME268800	GUT_GENOME272604	98.8181	712	795	0.895597
GUT_GENOME268800	GUT_GENOME259926	98.8151	753	795	0.94717
GUT_GENOME268800	GUT_GENOME283661	98.8	706	795	0.88805
GUT_GENOME268800	GUT_GENOME194478	98.7975	719	795	0.904403
GUT_GENOME268800	GUT_GENOME268679	98.7966	685	795	0.861635
GUT_GENOME268800	GUT_GENOME255937	98.7908	740	795	0.930818
GUT_GENOME268800	GUT_GENOME197978	98.7875	700	795	0.880503
GUT_GENOME268800	GUT_GENOME004204	98.7786	718	795	0.903145
GUT_GENOME268800	GUT_GENOME280050	98.7723	746	795	0.938365
GUT_GENOME268800	GUT_GENOME000172	98.7656	763	795	0.959748
GUT_GENOME268800	GUT_GENOME261056	98.7644	751	795	0.944654
GUT_GENOME268800	GUT_GENOME256352	98.7626	735	795	0.924528
GUT_GENOME268800	GUT_GENOME059925	98.7614	738	795	0.928302
GUT_GENOME268800	GUT_GENOME203567	98.7578	721	795	0.906918
GUT_GENOME268800	GUT_GENOME008526	98.747	682	795	0.857862
GUT_GENOME268800	GUT_GENOME112073	98.7461	722	795	0.908176
GUT_GENOME268800	GUT_GENOME284371	98.7363	740	795	0.930818
GUT_GENOME268800	GUT_GENOME100934	98.713	724	795	0.910692
GUT_GENOME268800	GUT_GENOME020289	98.6779	725	795	0.91195
GUT_GENOME268800	GUT_GENOME040647	98.6768	720	795	0.90566
GUT_GENOME268800	GUT_GENOME025391	98.6733	752	795	0.945912
GUT_GENOME268800	GUT_GENOME024044	98.661	752	795	0.945912
GUT_GENOME268800	GUT_GENOME022435	98.6505	686	795	0.862893
GUT_GENOME268800	GUT_GENOME056667	98.6248	699	795	0.879245
GUT_GENOME268800	GUT_GENOME245153	98.6154	733	795	0.922013
GUT_GENOME268800	GUT_GENOME044157	98.6139	667	795	0.838994
GUT_GENOME268800	GUT_GENOME070705	98.5837	623	795	0.783648
GUT_GENOME268800	GUT_GENOME164892	98.5772	670	795	0.842767
GUT_GENOME268800	GUT_GENOME004475	98.5168	631	795	0.793711
GUT_GENOME268800	GUT_GENOME082868	98.3833	683	795	0.859119
GUT_GENOME268800	GUT_GENOME199294	98.3081	713	795	0.896855
GUT_GENOME268800	GUT_GENOME148080	98.3034	731	795	0.919497
GUT_GENOME268800	GUT_GENOME250382	98.2651	706	795	0.88805
GUT_GENOME268800	GUT_GENOME228470	98.1759	718	795	0.903145
GUT_GENOME268800	GUT_GENOME000977	97.9068	738	795	0.928302
GUT_GENOME268800	GUT_GENOME234468	97.8832	683	795	0.859119
GUT_GENOME268800	GUT_GENOME017328	97.8399	695	795	0.874214
GUT_GENOME268800	GUT_GENOME269593	88.7552	592	795	0.744654
GUT_GENOME268800	GUT_GENOME266759	88.7528	603	795	0.758491
GUT_GENOME268800	GUT_GENOME023277	88.7527	576	795	0.724528
GUT_GENOME268800	GUT_GENOME252536	88.7079	601	795	0.755975
GUT_GENOME268800	GUT_GENOME272961	88.6555	607	795	0.763522
GUT_GENOME268800	GUT_GENOME039234	88.6241	580	795	0.72956
GUT_GENOME268800	GUT_GENOME011904	88.6223	565	795	0.710692
GUT_GENOME268800	GUT_GENOME070238	87.5999	534	795	0.671698
GUT_GENOME268800	GUT_GENOME116467	87.413	566	795	0.71195
GUT_GENOME248540	GUT_GENOME007205	98.9087	718	829	0.866104
GUT_GENOME248540	GUT_GENOME209369	98.8161	736	829	0.887817
GUT_GENOME248540	GUT_GENOME117486	98.8083	729	829	0.879373
GUT_GENOME248540	GUT_GENOME116561	98.783	736	829	0.887817
GUT_GENOME248540	GUT_GENOME016657	98.703	689	829	0.831122
GUT_GENOME248540	GUT_GENOME178562	98.1026	688	829	0.829916
GUT_GENOME248540	GUT_GENOME114128	94.5825	666	829	0.803378
GUT_GENOME248540	GUT_GENOME134342	94.4385	667	829	0.804584
GUT_GENOME248540	GUT_GENOME007468	94.4299	670	829	0.808203
GUT_GENOME248540	GUT_GENOME023119	94.4161	688	829	0.829916
GUT_GENOME248540	GUT_GENOME081229	94.3284	651	829	0.785283
GUT_GENOME248540	GUT_GENOME135134	94.313	652	829	0.78649
GUT_GENOME248540	GUT_GENOME216494	94.2353	646	829	0.779252
GUT_GENOME248540	GUT_GENOME001864	94.2186	683	829	0.823884
GUT_GENOME248540	GUT_GENOME052950	94.2029	627	829	0.756333
GUT_GENOME248540	GUT_GENOME255327	94.197	660	829	0.79614
GUT_GENOME248540	GUT_GENOME000911	94.1917	680	829	0.820265
GUT_GENOME248540	GUT_GENOME152168	94.1602	685	829	0.826297
GUT_GENOME248540	GUT_GENOME154601	94.1313	678	829	0.817853
GUT_GENOME248540	GUT_GENOME034920	94.1117	639	829	0.770808
GUT_GENOME248540	GUT_GENOME104328	94.0868	649	829	0.782871
GUT_GENOME248540	GUT_GENOME151433	94.0848	671	829	0.809409
GUT_GENOME248540	GUT_GENOME113260	94.0117	682	829	0.822678
GUT_GENOME248540	GUT_GENOME034785	93.9659	595	829	0.717732
GUT_GENOME020330	GUT_GENOME020289	99.9821	883	917	0.962923
GUT_GENOME020330	GUT_GENOME079065	98.7547	778	917	0.848419
GUT_GENOME020330	GUT_GENOME237017	98.716	835	917	0.910578
GUT_GENOME020330	GUT_GENOME004204	98.7034	797	917	0.869138
GUT_GENOME020330	GUT_GENOME194478	98.6884	775	917	0.845147
GUT_GENOME020330	GUT_GENOME259926	98.6835	831	917	0.906216
GUT_GENOME020330	GUT_GENOME114896	98.6832	843	917	0.919302
GUT_GENOME020330	GUT_GENOME077038	98.6797	781	917	0.85169
GUT_GENOME020330	GUT_GENOME284371	98.6782	818	917	0.892039
GUT_GENOME020330	GUT_GENOME261056	98.6659	822	917	0.896401
GUT_GENOME020330	GUT_GENOME022435	98.6627	747	917	0.814613
GUT_GENOME020330	GUT_GENOME197978	98.6615	783	917	0.853871
GUT_GENOME020330	GUT_GENOME268679	98.6601	725	917	0.790622
GUT_GENOME020330	GUT_GENOME025391	98.6597	841	917	0.917121
GUT_GENOME020330	GUT_GENOME000172	98.6546	837	917	0.912759
GUT_GENOME020330	GUT_GENOME255937	98.643	824	917	0.898582
GUT_GENOME020330	GUT_GENOME256352	98.6366	808	917	0.881134
GUT_GENOME020330	GUT_GENOME280050	98.6323	806	917	0.878953
GUT_GENOME020330	GUT_GENOME059925	98.6248	811	917	0.884406
GUT_GENOME020330	GUT_GENOME100934	98.6129	824	917	0.898582
GUT_GENOME020330	GUT_GENOME024044	98.6059	818	917	0.892039
GUT_GENOME020330	GUT_GENOME283661	98.6035	793	917	0.864776
GUT_GENOME020330	GUT_GENOME056667	98.5987	767	917	0.836423
GUT_GENOME020330	GUT_GENOME272604	98.5875	775	917	0.845147
GUT_GENOME020330	GUT_GENOME203567	98.5807	807	917	0.880044
GUT_GENOME020330	GUT_GENOME245153	98.5778	807	917	0.880044
GUT_GENOME020330	GUT_GENOME044157	98.5672	735	917	0.801527
GUT_GENOME020330	GUT_GENOME040647	98.5623	781	917	0.85169
GUT_GENOME020330	GUT_GENOME112073	98.5574	800	917	0.87241
GUT_GENOME020330	GUT_GENOME164892	98.5319	717	917	0.781897
GUT_GENOME020330	GUT_GENOME070705	98.5252	684	917	0.745911
GUT_GENOME020330	GUT_GENOME008526	98.4826	734	917	0.800436
GUT_GENOME020330	GUT_GENOME004475	98.4418	679	917	0.740458
GUT_GENOME020330	GUT_GENOME082868	98.3545	765	917	0.834242
GUT_GENOME020330	GUT_GENOME148080	98.231	808	917	0.881134
GUT_GENOME020330	GUT_GENOME199294	98.1625	810	917	0.883315
GUT_GENOME020330	GUT_GENOME228470	98.1457	795	917	0.866957
GUT_GENOME020330	GUT_GENOME250382	98.1447	787	917	0.858233
GUT_GENOME020330	GUT_GENOME000977	97.8136	821	917	0.895311
GUT_GENOME020330	GUT_GENOME234468	97.8049	764	917	0.833152
GUT_GENOME020330	GUT_GENOME017328	97.7088	774	917	0.844057
GUT_GENOME020330	GUT_GENOME272961	88.9776	680	917	0.741549
GUT_GENOME020330	GUT_GENOME011904	88.9524	602	917	0.656489
GUT_GENOME020330	GUT_GENOME023277	88.8629	653	917	0.712105
GUT_GENOME020330	GUT_GENOME269593	88.8043	669	917	0.729553
GUT_GENOME020330	GUT_GENOME252536	88.7851	686	917	0.748092
GUT_GENOME020330	GUT_GENOME266759	88.763	692	917	0.754635
GUT_GENOME020330	GUT_GENOME039234	88.6884	650	917	0.708833
GUT_GENOME020330	GUT_GENOME116467	87.9569	626	917	0.682661
GUT_GENOME020330	GUT_GENOME070238	87.9458	586	917	0.63904
GUT_GENOME115352	GUT_GENOME134342	98.9176	770	877	0.877993
GUT_GENOME115352	GUT_GENOME007468	98.8159	792	877	0.903079
GUT_GENOME115352	GUT_GENOME114128	98.806	793	877	0.904219
GUT_GENOME115352	GUT_GENOME023119	98.7997	781	877	0.890536
GUT_GENOME115352	GUT_GENOME052950	98.7444	714	877	0.814139
GUT_GENOME115352	GUT_GENOME135134	98.7112	751	877	0.856328
GUT_GENOME115352	GUT_GENOME255327	98.6627	763	877	0.870011
GUT_GENOME115352	GUT_GENOME216494	98.5254	746	877	0.850627
GUT_GENOME115352	GUT_GENOME081229	98.3994	753	877	0.858609
GUT_GENOME115352	GUT_GENOME034785	98.0462	675	877	0.769669
GUT_GENOME115352	GUT_GENOME104328	97.996	739	877	0.842645
GUT_GENOME115352	GUT_GENOME001864	97.9008	784	877	0.893957
GUT_GENOME115352	GUT_GENOME034920	97.8839	733	877	0.835804
GUT_GENOME115352	GUT_GENOME152168	97.8241	774	877	0.882554
GUT_GENOME115352	GUT_GENOME113260	97.8095	765	877	0.872292
GUT_GENOME115352	GUT_GENOME154601	97.7987	769	877	0.876853
GUT_GENOME115352	GUT_GENOME151433	97.7776	769	877	0.876853
GUT_GENOME115352	GUT_GENOME000911	97.7701	784	877	0.893957
GUT_GENOME115352	GUT_GENOME209369	94.4592	693	877	0.790194
GUT_GENOME115352	GUT_GENOME016657	94.4382	656	877	0.748005
GUT_GENOME115352	GUT_GENOME007205	94.2777	677	877	0.77195
GUT_GENOME115352	GUT_GENOME116561	94.2431	695	877	0.792474
GUT_GENOME115352	GUT_GENOME117486	94.2217	697	877	0.794755
GUT_GENOME115352	GUT_GENOME178562	93.9914	665	877	0.758267
GUT_GENOME197386	GUT_GENOME059925	98.8794	841	974	0.86345
GUT_GENOME197386	GUT_GENOME259926	98.8482	863	974	0.886037
GUT_GENOME197386	GUT_GENOME194478	98.8353	804	974	0.825462
GUT_GENOME197386	GUT_GENOME255937	98.8331	843	974	0.865503
GUT_GENOME197386	GUT_GENOME025391	98.8328	864	974	0.887064
GUT_GENOME197386	GUT_GENOME114896	98.8288	839	974	0.861396
GUT_GENOME197386	GUT_GENOME237017	98.8142	860	974	0.882957
GUT_GENOME197386	GUT_GENOME077038	98.813	812	974	0.833676
GUT_GENOME197386	GUT_GENOME079065	98.8053	793	974	0.814168
GUT_GENOME197386	GUT_GENOME000172	98.8023	895	974	0.918891
GUT_GENOME197386	GUT_GENOME197978	98.781	818	974	0.839836
GUT_GENOME197386	GUT_GENOME272604	98.7741	785	974	0.805955
GUT_GENOME197386	GUT_GENOME268679	98.7718	745	974	0.764887
GUT_GENOME197386	GUT_GENOME203567	98.7693	837	974	0.859343
GUT_GENOME197386	GUT_GENOME004204	98.7645	839	974	0.861396
GUT_GENOME197386	GUT_GENOME284371	98.7437	840	974	0.862423
GUT_GENOME197386	GUT_GENOME056667	98.7211	779	974	0.799795
GUT_GENOME197386	GUT_GENOME283661	98.718	822	974	0.843943
GUT_GENOME197386	GUT_GENOME280050	98.7106	835	974	0.85729
GUT_GENOME197386	GUT_GENOME256352	98.7087	840	974	0.862423
GUT_GENOME197386	GUT_GENOME044157	98.7054	773	974	0.793634
GUT_GENOME197386	GUT_GENOME112073	98.7005	826	974	0.848049
GUT_GENOME197386	GUT_GENOME022435	98.6988	760	974	0.780287
GUT_GENOME197386	GUT_GENOME100934	98.697	838	974	0.86037
GUT_GENOME197386	GUT_GENOME024044	98.674	849	974	0.871663
GUT_GENOME197386	GUT_GENOME164892	98.6669	762	974	0.782341
GUT_GENOME197386	GUT_GENOME261056	98.6603	845	974	0.867556
GUT_GENOME197386	GUT_GENOME020289	98.6395	822	974	0.843943
GUT_GENOME197386	GUT_GENOME245153	98.6281	853	974	0.87577
GUT_GENOME197386	GUT_GENOME008526	98.6211	751	974	0.771047
GUT_GENOME197386	GUT_GENOME070705	98.5889	705	974	0.723819
GUT_GENOME197386	GUT_GENOME040647	98.5872	802	974	0.823409
GUT_GENOME197386	GUT_GENOME004475	98.4534	688	974	0.706366
GUT_GENOME197386	GUT_GENOME082868	98.3595	779	974	0.799795
GUT_GENOME197386	GUT_GENOME148080	98.3264	838	974	0.86037
GUT_GENOME197386	GUT_GENOME199294	98.2601	809	974	0.830595
GUT_GENOME197386	GUT_GENOME250382	98.2314	812	974	0.833676
GUT_GENOME197386	GUT_GENOME228470	98.1499	811	974	0.832649
GUT_GENOME197386	GUT_GENOME234468	97.9218	769	974	0.789528
GUT_GENOME197386	GUT_GENOME017328	97.7863	797	974	0.818275
GUT_GENOME197386	GUT_GENOME000977	97.7036	852	974	0.874743
GUT_GENOME197386	GUT_GENOME039234	89.0664	662	974	0.679671
GUT_GENOME197386	GUT_GENOME266759	88.9957	682	974	0.700205
GUT_GENOME197386	GUT_GENOME252536	88.9511	687	974	0.705339
GUT_GENOME197386	GUT_GENOME272961	88.9499	674	974	0.691992
GUT_GENOME197386	GUT_GENOME269593	88.8449	684	974	0.702259
GUT_GENOME197386	GUT_GENOME023277	88.8055	647	974	0.664271
GUT_GENOME197386	GUT_GENOME011904	88.7992	616	974	0.632444
GUT_GENOME197386	GUT_GENOME116467	87.9887	638	974	0.655031
GUT_GENOME197386	GUT_GENOME070238	87.851	608	974	0.62423
GUT_GENOME111487	GUT_GENOME280050	99.1716	822	897	0.916388
GUT_GENOME111487	GUT_GENOME008526	99.093	751	897	0.837235
GUT_GENOME111487	GUT_GENOME194478	98.9106	784	897	0.874025
GUT_GENOME111487	GUT_GENOME245153	98.8698	819	897	0.913043
GUT_GENOME111487	GUT_GENOME112073	98.7777	791	897	0.881828
GUT_GENOME111487	GUT_GENOME283661	98.7633	779	897	0.86845
GUT_GENOME111487	GUT_GENOME114896	98.7626	799	897	0.890747
GUT_GENOME111487	GUT_GENOME077038	98.7533	766	897	0.853958
GUT_GENOME111487	GUT_GENOME284371	98.7386	803	897	0.895206
GUT_GENOME111487	GUT_GENOME268679	98.7307	711	897	0.792642
GUT_GENOME111487	GUT_GENOME272604	98.7294	740	897	0.824972
GUT_GENOME111487	GUT_GENOME025391	98.7121	805	897	0.897436
GUT_GENOME111487	GUT_GENOME022435	98.7017	745	897	0.830546
GUT_GENOME111487	GUT_GENOME004204	98.6969	790	897	0.880713
GUT_GENOME111487	GUT_GENOME197978	98.6926	760	897	0.847269
GUT_GENOME111487	GUT_GENOME237017	98.6915	822	897	0.916388
GUT_GENOME111487	GUT_GENOME024044	98.6838	815	897	0.908584
GUT_GENOME111487	GUT_GENOME059925	98.6789	798	897	0.889632
GUT_GENOME111487	GUT_GENOME261056	98.6656	808	897	0.90078
GUT_GENOME111487	GUT_GENOME255937	98.6622	804	897	0.896321
GUT_GENOME111487	GUT_GENOME079065	98.662	748	897	0.833891
GUT_GENOME111487	GUT_GENOME040647	98.6566	767	897	0.855072
GUT_GENOME111487	GUT_GENOME056667	98.6559	750	897	0.83612
GUT_GENOME111487	GUT_GENOME100934	98.6508	802	897	0.894091
GUT_GENOME111487	GUT_GENOME256352	98.6416	791	897	0.881828
GUT_GENOME111487	GUT_GENOME203567	98.6385	788	897	0.878484
GUT_GENOME111487	GUT_GENOME259926	98.6009	819	897	0.913043
GUT_GENOME111487	GUT_GENOME000172	98.5904	829	897	0.924192
GUT_GENOME111487	GUT_GENOME164892	98.5503	723	897	0.80602
GUT_GENOME111487	GUT_GENOME044157	98.5383	723	897	0.80602
GUT_GENOME111487	GUT_GENOME082868	98.5226	743	897	0.828317
GUT_GENOME111487	GUT_GENOME020289	98.5019	778	897	0.867336
GUT_GENOME111487	GUT_GENOME004475	98.4552	661	897	0.736901
GUT_GENOME111487	GUT_GENOME070705	98.3973	664	897	0.740245
GUT_GENOME111487	GUT_GENOME199294	98.3473	775	897	0.863991
GUT_GENOME111487	GUT_GENOME148080	98.3194	795	897	0.886288
GUT_GENOME111487	GUT_GENOME250382	98.2927	772	897	0.860647
GUT_GENOME111487	GUT_GENOME228470	98.2593	771	897	0.859532
GUT_GENOME111487	GUT_GENOME234468	97.924	756	897	0.842809
GUT_GENOME111487	GUT_GENOME000977	97.8722	812	897	0.90524
GUT_GENOME111487	GUT_GENOME017328	97.8372	755	897	0.841695
GUT_GENOME111487	GUT_GENOME266759	88.8594	644	897	0.717949
GUT_GENOME111487	GUT_GENOME269593	88.8473	628	897	0.700111
GUT_GENOME111487	GUT_GENOME023277	88.8312	602	897	0.671126
GUT_GENOME111487	GUT_GENOME252536	88.7461	640	897	0.713489
GUT_GENOME111487	GUT_GENOME272961	88.7251	648	897	0.722408
GUT_GENOME111487	GUT_GENOME011904	88.7024	586	897	0.653289
GUT_GENOME111487	GUT_GENOME039234	88.5773	613	897	0.683389
GUT_GENOME111487	GUT_GENOME116467	87.6699	597	897	0.665552
GUT_GENOME111487	GUT_GENOME070238	87.6446	566	897	0.630992
GUT_GENOME160087	GUT_GENOME259926	98.9138	850	906	0.93819
GUT_GENOME160087	GUT_GENOME194478	98.8855	781	906	0.862031
GUT_GENOME160087	GUT_GENOME000172	98.8589	853	906	0.941501
GUT_GENOME160087	GUT_GENOME284371	98.8243	817	906	0.901766
GUT_GENOME160087	GUT_GENOME283661	98.8238	791	906	0.873068
GUT_GENOME160087	GUT_GENOME022435	98.8163	749	906	0.826711
GUT_GENOME160087	GUT_GENOME079065	98.8162	774	906	0.854305
GUT_GENOME160087	GUT_GENOME197978	98.7974	775	906	0.855408
[truncated: 551,272+ more rows]
