# Supplementary material for: Circulating Levels of the Short-Chain Fatty Acid Acetate Mediate the Effect of the Gut Microbiome on Visceral Fat
Source: Front Microbiol. 2021 Jul 15;12:711359. doi: 10.3389/fmicb.2021.711359 (PMC8320334; doi:10.3389/fmicb.2021.711359)
Supplement: Supplementary Table 1 — The created dataset containing 1,121 ultra high-quality genomes belonging to Coprococcus and 271 high-quality genomes belonging to Lachnoclostridium and their respective metadata. [file Table_1.XLSX]

## Sheet: Coprococcus
Genome	Original_name	Study_set	Genome_type	Length	N_contigs	N50	GC_content	Completeness	Contamination	CMseq	rRNA_5S	rRNA_16S	rRNA_23S	tRNAs	Genome_accession	Species_rep	MGnify_accession	Lineage	Sample_accession	Study_accession	Country	Continent	FTP_download	Strain	Cluster
GCF_009875795.1		RefSeq	Isolate	3234243	19	602506	44.41	99.33	0									Coprococcus eutactus_A	SAMN11945339	PRJNA224116	United States	North America	ftp://ftp.ncbi.nlm.nih.gov/genomes/all/GCF/009/875/795/GCF_009875795.1_ASM987579v1	strain=BIOML-A2	2
GCF_009875825.1		RefSeq	Isolate	3220441	22	597239	44.41	99.33	0									Coprococcus eutactus_A	SAMN11945338	PRJNA224116	United States	North America	ftp://ftp.ncbi.nlm.nih.gov/genomes/all/GCF/009/875/825/GCF_009875825.1_ASM987582v1	strain=BIOML-A1	2
GCF_013299545.1		RefSeq	Isolate	3368967	62	141127	43.24	99.42	0									Coprococcus comes	SAMN14067791	PRJNA224116	United States	North America	ftp://ftp.ncbi.nlm.nih.gov/genomes/all/GCF/013/299/545/GCF_013299545.1_ASM1329954v1	strain=MSK.17.85	3
GCF_013299605.1		RefSeq	Isolate	3053460	33	233625	40.86	99.33	0									Coprococcus sp900066115	SAMN14067795	PRJNA224116	United States	North America	ftp://ftp.ncbi.nlm.nih.gov/genomes/all/GCF/013/299/605/GCF_013299605.1_ASM1329960v1	strain=MSK.18.32	4
GCF_013299665.1		RefSeq	Isolate	3376110	66	131452	43.26	99.42	0									Coprococcus comes	SAMN14067784	PRJNA224116	United States	North America	ftp://ftp.ncbi.nlm.nih.gov/genomes/all/GCF/013/299/665/GCF_013299665.1_ASM1329966v1	strain=MSK.17.59	3
GCF_013299685.1		RefSeq	Isolate	3391420	71	126733	43.25	99.42	0									Coprococcus comes	SAMN14067781	PRJNA224116	United States	North America	ftp://ftp.ncbi.nlm.nih.gov/genomes/all/GCF/013/299/685/GCF_013299685.1_ASM1329968v1	strain=MSK.17.45	3
GCF_013299745.1		RefSeq	Isolate	3376309	68	135334	43.26	99.42	0									Coprococcus comes	SAMN14067777	PRJNA224116	United States	North America	ftp://ftp.ncbi.nlm.nih.gov/genomes/all/GCF/013/299/745/GCF_013299745.1_ASM1329974v1	strain=MSK.17.27	3
GCF_013299755.1		RefSeq	Isolate	3225908	74	128549	42.4	99.42	0.19									Coprococcus comes	SAMN14067771	PRJNA224116	United States	North America	ftp://ftp.ncbi.nlm.nih.gov/genomes/all/GCF/013/299/755/GCF_013299755.1_ASM1329975v1	strain=MSK.16.59	3
GCF_013299925.1		RefSeq	Isolate	3296467	106	72064	42.81	99.42	0									Coprococcus comes	SAMN14067755	PRJNA224116	United States	North America	ftp://ftp.ncbi.nlm.nih.gov/genomes/all/GCF/013/299/925/GCF_013299925.1_ASM1329992v1	strain=MSK.20.24	3
GCF_013300095.1		RefSeq	Isolate	3260933	89	78838	42.62	99.42	0.19									Coprococcus comes	SAMN14067745	PRJNA224116	United States	North America	ftp://ftp.ncbi.nlm.nih.gov/genomes/all/GCF/013/300/095/GCF_013300095.1_ASM1330009v1	strain=MSK.18.76	3
GCF_013300105.1		RefSeq	Isolate	3056470	31	235740	40.86	99.33	0									Coprococcus sp900066115	SAMN14067744	PRJNA224116	United States	North America	ftp://ftp.ncbi.nlm.nih.gov/genomes/all/GCF/013/300/105/GCF_013300105.1_ASM1330010v1	strain=MSK.18.68	4
GCF_013300315.1		RefSeq	Isolate	3344359	65	131452	43.06	99.42	0									Coprococcus comes	SAMN14067803	PRJNA224116	United States	North America	ftp://ftp.ncbi.nlm.nih.gov/genomes/all/GCF/013/300/315/GCF_013300315.1_ASM1330031v1	strain=MSK.17.80	3
GCF_013300465.1		RefSeq	Isolate	3144779	82	78786	42.78	99.42	0.19									Coprococcus comes	SAMN14067792	PRJNA224116	United States	North America	ftp://ftp.ncbi.nlm.nih.gov/genomes/all/GCF/013/300/465/GCF_013300465.1_ASM1330046v1	strain=MSK.18.12	3
GCF_013300605.1		RefSeq	Isolate	3376185	71	126732	43.26	99.42	0									Coprococcus comes	SAMN14067779	PRJNA224116	United States	North America	ftp://ftp.ncbi.nlm.nih.gov/genomes/all/GCF/013/300/605/GCF_013300605.1_ASM1330060v1	strain=MSK.17.39	3
GCF_013300635.1		RefSeq	Isolate	3328787	63	141211	43.07	99.42	0									Coprococcus comes	SAMN14067776	PRJNA224116	United States	North America	ftp://ftp.ncbi.nlm.nih.gov/genomes/all/GCF/013/300/635/GCF_013300635.1_ASM1330063v1	strain=MSK.17.21	3
GCF_013300725.1		RefSeq	Isolate	3376985	112	96667	42.4	99.42	0.49									Coprococcus comes	SAMN14067772	PRJNA224116	United States	North America	ftp://ftp.ncbi.nlm.nih.gov/genomes/all/GCF/013/300/725/GCF_013300725.1_ASM1330072v1	strain=MSK.16.63	3
GCF_013300745.1		RefSeq	Isolate	3184889	73	123408	42.36	99.42	0.19									Coprococcus comes	SAMN14067770	PRJNA224116	United States	North America	ftp://ftp.ncbi.nlm.nih.gov/genomes/all/GCF/013/300/745/GCF_013300745.1_ASM1330074v1	strain=MSK.16.50	3
GCF_013300805.1		RefSeq	Isolate	3288183	99	78895	42.73	99.42	0									Coprococcus comes	SAMN14067762	PRJNA224116	United States	North America	ftp://ftp.ncbi.nlm.nih.gov/genomes/all/GCF/013/300/805/GCF_013300805.1_ASM1330080v1	strain=MSK.20.88	3
GCF_013301405.1		RefSeq	Isolate	2730768	17	375534	41.31	99.33	0									Coprococcus sp900066115	SAMN14067708	PRJNA224116	United States	North America	ftp://ftp.ncbi.nlm.nih.gov/genomes/all/GCF/013/301/405/GCF_013301405.1_ASM1330140v1	strain=MSK.6.35	4
GCF_013301435.1		RefSeq	Isolate	3154980	32	178575	43.82	99.33	0									Coprococcus eutactus_A	SAMN14067707	PRJNA224116	United States	North America	ftp://ftp.ncbi.nlm.nih.gov/genomes/all/GCF/013/301/435/GCF_013301435.1_ASM1330143v1	strain=MSK.10.6	2
GCF_013301465.1		RefSeq	Isolate	3187055	76	116663	42.36	99.42	0.19									Coprococcus comes	SAMN14067706	PRJNA224116	United States	North America	ftp://ftp.ncbi.nlm.nih.gov/genomes/all/GCF/013/301/465/GCF_013301465.1_ASM1330146v1	strain=MSK.16.8	3
GCF_013301475.1		RefSeq	Isolate	3187910	75	123408	42.36	99.42	0.19									Coprococcus comes	SAMN14067705	PRJNA224116	United States	North America	ftp://ftp.ncbi.nlm.nih.gov/genomes/all/GCF/013/301/475/GCF_013301475.1_ASM1330147v1	strain=MSK.16.14	3
GCF_013301505.1		RefSeq	Isolate	3132475	98	89540	42.41	99.42	0									Coprococcus comes	SAMN14067702	PRJNA224116	United States	North America	ftp://ftp.ncbi.nlm.nih.gov/genomes/all/GCF/013/301/505/GCF_013301505.1_ASM1330150v1	strain=MSK.11.53	3
GCF_013301515.1		RefSeq	Isolate	3183309	75	116620	42.36	99.42	0.19									Coprococcus comes	SAMN14067703	PRJNA224116	United States	North America	ftp://ftp.ncbi.nlm.nih.gov/genomes/all/GCF/013/301/515/GCF_013301515.1_ASM1330151v1	strain=MSK.16.11	3
GCF_013301525.1		RefSeq	Isolate	3201448	78	107261	42.4	99.42	0.19									Coprococcus comes	SAMN14067704	PRJNA224116	United States	North America	ftp://ftp.ncbi.nlm.nih.gov/genomes/all/GCF/013/301/525/GCF_013301525.1_ASM1330152v1	strain=MSK.16.12	3
GCF_013301545.1		RefSeq	Isolate	3089026	94	78100	42.3	99.42	0									Coprococcus comes	SAMN14067701	PRJNA224116	United States	North America	ftp://ftp.ncbi.nlm.nih.gov/genomes/all/GCF/013/301/545/GCF_013301545.1_ASM1330154v1	strain=MSK.11.50	3
GCF_013301565.1		RefSeq	Isolate	3108370	90	79636	42.46	99.42	0									Coprococcus comes	SAMN14067700	PRJNA224116	United States	North America	ftp://ftp.ncbi.nlm.nih.gov/genomes/all/GCF/013/301/565/GCF_013301565.1_ASM1330156v1	strain=MSK.11.23	3
GCF_013301605.1		RefSeq	Isolate	3681316	141	99352	42.66	99.42	0									Coprococcus comes	SAMN14067699	PRJNA224116	United States	North America	ftp://ftp.ncbi.nlm.nih.gov/genomes/all/GCF/013/301/605/GCF_013301605.1_ASM1330160v1	strain=MSK.10.14	3
GCF_013361125.1		RefSeq	Isolate	3326352	188	40242	42.69	99.42	0.1									Coprococcus comes	SRS6342598	PRJNA224116	United States	North America	ftp://ftp.ncbi.nlm.nih.gov/genomes/all/GCF/013/361/125/GCF_013361125.1_ASM1336112v1	strain=F22	3
GCF_014287735.1		RefSeq	Isolate	2830394	13	520778	41.24	99.33	0									Coprococcus sp900066115	SAMN15808036	PRJNA224116	China	Asia	ftp://ftp.ncbi.nlm.nih.gov/genomes/all/GCF/014/287/735/GCF_014287735.1_ASM1428773v1	strain=NSJ-10	4
GCF_015547305.1		RefSeq	Isolate	3408665	88	61160	42.56	99.42	0									Coprococcus comes	SAMN15533075	PRJNA224116	United States	North America	ftp://ftp.ncbi.nlm.nih.gov/genomes/all/GCF/015/547/305/GCF_015547305.1_ASM1554730v1	strain=1001713B170207_170306_A5	3
GCF_015548425.1		RefSeq	Isolate	3278305	67	130108	42.35	99.42	0									Coprococcus comes	SAMN15532673	PRJNA224116	United States	North America	ftp://ftp.ncbi.nlm.nih.gov/genomes/all/GCF/015/548/425/GCF_015548425.1_ASM1554842v1	strain=BSD2780120875b_170604_E1	3
GCF_015548735.1		RefSeq	Isolate	3119885	47	195588	42.38	99.42	0									Coprococcus comes	SAMN15533028	PRJNA224116	United States	North America	ftp://ftp.ncbi.nlm.nih.gov/genomes/all/GCF/015/548/735/GCF_015548735.1_ASM1554873v1	strain=D40t1_170626_H11	3
GCF_015549285.1		RefSeq	Isolate	3194664	56	126233	43.01	99.42	0.49									Coprococcus comes	SAMN15532823	PRJNA224116	United States	North America	ftp://ftp.ncbi.nlm.nih.gov/genomes/all/GCF/015/549/285/GCF_015549285.1_ASM1554928v1	strain=J1101004_170508_C2	3
GCF_015550485.1		RefSeq	Isolate	3231512	176	38463	42.61	99.42	0									Coprococcus comes	SAMN15533249	PRJNA224116	United States	North America	ftp://ftp.ncbi.nlm.nih.gov/genomes/all/GCF/015/550/485/GCF_015550485.1_ASM1555048v1	strain=D6t1_180914_H5	3
GCF_015552445.1		RefSeq	Isolate	3445054	113	73377	42.36	99.42	0									Coprococcus comes	SAMN15533318	PRJNA224116	United States	North America	ftp://ftp.ncbi.nlm.nih.gov/genomes/all/GCF/015/552/445/GCF_015552445.1_ASM1555244v1	strain=D54t1_190329_C12	3
GCF_015552615.1		RefSeq	Isolate	3281372	88	98295	42.66	99.42	0.39									Coprococcus comes	SAMN15533250	PRJNA224116	United States	North America	ftp://ftp.ncbi.nlm.nih.gov/genomes/all/GCF/015/552/615/GCF_015552615.1_ASM1555261v1	strain=D41t1_190614_C3	3
GCF_015553595.1		RefSeq	Isolate	3077765	46	186312	42.56	99.42	0									Coprococcus comes	SAMN15533136	PRJNA224116	United States	North America	ftp://ftp.ncbi.nlm.nih.gov/genomes/all/GCF/015/553/595/GCF_015553595.1_ASM1555359v1	strain=1001713B170207_170306_E2	3
GCF_015554215.1		RefSeq	Isolate	3565144	181	40674	42.81	99.42	0.88									Coprococcus comes	SAMN15533210	PRJNA224116	United States	North America	ftp://ftp.ncbi.nlm.nih.gov/genomes/all/GCF/015/554/215/GCF_015554215.1_ASM1555421v1	strain=1001271B_151109_E1	3
GCF_015554275.1		RefSeq	Isolate	3215049	52	146655	42.64	99.42	0									Coprococcus comes	SAMN15532990	PRJNA224116	United States	North America	ftp://ftp.ncbi.nlm.nih.gov/genomes/all/GCF/015/554/275/GCF_015554275.1_ASM1555427v1	strain=D55t1_190419_D6	3
GCF_015554465.1		RefSeq	Isolate	3487153	163	48713	42.38	99.42	0									Coprococcus comes	SAMN15532792	PRJNA224116	United States	North America	ftp://ftp.ncbi.nlm.nih.gov/genomes/all/GCF/015/554/465/GCF_015554465.1_ASM1555446v1	strain=D43t1_170807_C12	3
GCF_015556185.1		RefSeq	Isolate	3287887	49	166265	42.48	99.42	0.29									Coprococcus comes	SAMN15532811	PRJNA224116	United States	North America	ftp://ftp.ncbi.nlm.nih.gov/genomes/all/GCF/015/556/185/GCF_015556185.1_ASM1555618v1	strain=D31t1_170403_G3	3
GCF_015558505.1		RefSeq	Isolate	3350557	67	122374	42.31	99.42	0.39									Coprococcus comes	SAMN15532605	PRJNA224116	United States	North America	ftp://ftp.ncbi.nlm.nih.gov/genomes/all/GCF/015/558/505/GCF_015558505.1_ASM1555850v1	strain=1001283B150304_161114_E1	3
GCF_015560155.1		RefSeq	Isolate	3308028	94	68579	42.61	99.42	0									Coprococcus comes	SAMN15532575	PRJNA224116	United States	North America	ftp://ftp.ncbi.nlm.nih.gov/genomes/all/GCF/015/560/155/GCF_015560155.1_ASM1556015v1	strain=D54t1_190329_E4	3
GCF_016586415.1		RefSeq	Isolate	3238375	54	147058	43.73	99.33	0									Coprococcus eutactus_A	SAMD00220748	PRJNA224116			ftp://ftp.ncbi.nlm.nih.gov/genomes/all/GCF/016/586/415/GCF_016586415.1_ASM1658641v1	strain=JCM 31265	2
GCF_902362315.1		RefSeq	Isolate	3284856	13	460715	43.2	99.33	0									Coprococcus eutactus	ERS3638048	PRJNA224116	United Kingdom	Europe	ftp://ftp.ncbi.nlm.nih.gov/genomes/all/GCF/902/362/315/GCF_902362315.1_MGYG-HGUT-00018		1
GCF_902364515.1		RefSeq	Isolate	3050452	12	959449	43.8	99.33	0									Coprococcus eutactus_A	ERS3638261	PRJNA224116	China	Asia	ftp://ftp.ncbi.nlm.nih.gov/genomes/all/GCF/902/364/515/GCF_902364515.1_MGYG-HGUT-00231		2
GUT_GENOME000055	12718_7_47	HBC	Isolate	3280206	34	193753	43.2	99.33	0		0	99.74	99.79	20		GUT_GENOME000055	MGYG-HGUT-00018	Coprococcus eutactus	ERS417254	ERP105624	United Kingdom	Europe	ftp://ftp.ebi.ac.uk/pub/databases/metagenomics/mgnify_genomes/human-gut/v1.0/all_genomes/MGYG-HGUT-000/MGYG-HGUT-00018/genomes1/GUT_GENOME000055.gff.gz		1
GUT_GENOME000112	13414_6_13	HBC	Isolate	3174779	22	406660	43.76	99.33	0		0	99.74	99.79	20		GUT_GENOME001379	MGYG-HGUT-00231	Coprococcus eutactus_A	ERS852386	ERP012217	United Kingdom	Europe	ftp://ftp.ebi.ac.uk/pub/databases/metagenomics/mgnify_genomes/human-gut/v1.0/all_genomes/MGYG-HGUT-002/MGYG-HGUT-00231/genomes3/GUT_GENOME000112.gff.gz		2
GUT_GENOME000115	13414_6_16	HBC	Isolate	3219015	57	131809	42.16	99.22	0.12		91.6	99.67	99.62	20		GUT_GENOME095993	MGYG-HGUT-01315	Coprococcus comes	ERS852389	ERP012217	United Kingdom	Europe	ftp://ftp.ebi.ac.uk/pub/databases/metagenomics/mgnify_genomes/human-gut/v1.0/all_genomes/MGYG-HGUT-013/MGYG-HGUT-01315/genomes1/GUT_GENOME000115.gff.gz		3
GUT_GENOME000125	13414_6_27	HBC	Isolate	3233928	30	198296	43.74	99.33	0		0	99.74	99.79	20		GUT_GENOME001379	MGYG-HGUT-00231	Coprococcus eutactus_A	ERS852400	ERP012217	United Kingdom	Europe	ftp://ftp.ebi.ac.uk/pub/databases/metagenomics/mgnify_genomes/human-gut/v1.0/all_genomes/MGYG-HGUT-002/MGYG-HGUT-00231/genomes3/GUT_GENOME000125.gff.gz		2
GUT_GENOME000138	13414_6_3	HBC	Isolate	2912037	12	388232	40.98	99.33	0		0	99.74	99.79	20		GUT_GENOME001027	MGYG-HGUT-00189	Coprococcus sp900066115	ERS852377	ERP012217	United Kingdom	Europe	ftp://ftp.ebi.ac.uk/pub/databases/metagenomics/mgnify_genomes/human-gut/v1.0/all_genomes/MGYG-HGUT-001/MGYG-HGUT-00189/genomes2/GUT_GENOME000138.gff.gz		4
GUT_GENOME000172	13414_6_72	HBC	Isolate	3146131	36	263531	43.94	99.27	0		0	99.74	99.79	20		GUT_GENOME001379	MGYG-HGUT-00231	Coprococcus eutactus_A	ERS852445	ERP012217	United Kingdom	Europe	ftp://ftp.ebi.ac.uk/pub/databases/metagenomics/mgnify_genomes/human-gut/v1.0/all_genomes/MGYG-HGUT-002/MGYG-HGUT-00231/genomes2/GUT_GENOME000172.gff.gz		2
GUT_GENOME000182	13470_2_57	HBC	Isolate	3430916	42	165501	42.35	99.42	0		91.6	99.67	99.62	20		GUT_GENOME095993	MGYG-HGUT-01315	Coprococcus comes	ERS852453	ERP012217	United Kingdom	Europe	ftp://ftp.ebi.ac.uk/pub/databases/metagenomics/mgnify_genomes/human-gut/v1.0/all_genomes/MGYG-HGUT-013/MGYG-HGUT-01315/genomes1/GUT_GENOME000182.gff.gz		3
GUT_GENOME000209	13470_2_85	HBC	Isolate	3283691	58	99879	42.35	99.42	0		91.6	99.67	99.62	20		GUT_GENOME095993	MGYG-HGUT-01315	Coprococcus comes	ERS852481	ERP012217	United Kingdom	Europe	ftp://ftp.ebi.ac.uk/pub/databases/metagenomics/mgnify_genomes/human-gut/v1.0/all_genomes/MGYG-HGUT-013/MGYG-HGUT-01315/genomes1/GUT_GENOME000209.gff.gz		3
GUT_GENOME000253	14207_7_36	HBC	Isolate	3422612	48	152931	42.04	99.42	0		90.76	99.67	99.62	20		GUT_GENOME095993	MGYG-HGUT-01315	Coprococcus comes	ERS852525	ERP012217	United Kingdom	Europe	ftp://ftp.ebi.ac.uk/pub/databases/metagenomics/mgnify_genomes/human-gut/v1.0/all_genomes/MGYG-HGUT-013/MGYG-HGUT-01315/genomes1/GUT_GENOME000253.gff.gz		3
GUT_GENOME000297	14207_7_85	HBC	Isolate	3337371	75	127480	42.5	99.42	0.39		91.6	86.95	99.62	20		GUT_GENOME095993	MGYG-HGUT-01315	Coprococcus comes	ERS852574	ERP012217	United Kingdom	Europe	ftp://ftp.ebi.ac.uk/pub/databases/metagenomics/mgnify_genomes/human-gut/v1.0/all_genomes/MGYG-HGUT-013/MGYG-HGUT-01315/genomes1/GUT_GENOME000297.gff.gz		3
GUT_GENOME000298	14207_7_86	HBC	Isolate	3087177	19	619054	43.83	99.33	0		0	99.74	99.79	20		GUT_GENOME001379	MGYG-HGUT-00231	Coprococcus eutactus_A	ERS852575	ERP012217	United Kingdom	Europe	ftp://ftp.ebi.ac.uk/pub/databases/metagenomics/mgnify_genomes/human-gut/v1.0/all_genomes/MGYG-HGUT-002/MGYG-HGUT-00231/genomes3/GUT_GENOME000298.gff.gz		2
GUT_GENOME000360	18048_1_63	HBC	Isolate	3235972	37	229938	43.74	99.16	0		0	99.74	99.79	20		GUT_GENOME001379	MGYG-HGUT-00231	Coprococcus eutactus_A	ERS846606	ERP105624	United Kingdom	Europe	ftp://ftp.ebi.ac.uk/pub/databases/metagenomics/mgnify_genomes/human-gut/v1.0/all_genomes/MGYG-HGUT-002/MGYG-HGUT-00231/genomes3/GUT_GENOME000360.gff.gz		2
GUT_GENOME000362	18048_1_65	HBC	Isolate	3245337	39	173573	42.46	99.42	0		91.6	99.67	99.62	20		GUT_GENOME095993	MGYG-HGUT-01315	Coprococcus comes	ERS846608	ERP105624	United Kingdom	Europe	ftp://ftp.ebi.ac.uk/pub/databases/metagenomics/mgnify_genomes/human-gut/v1.0/all_genomes/MGYG-HGUT-013/MGYG-HGUT-01315/genomes1/GUT_GENOME000362.gff.gz		3
GUT_GENOME000859	AF15-31	CGR	Isolate	2711115	24	361298	41.18	99.33	0		0	99.74	99.79	20	GCA_003461625	GUT_GENOME001027	MGYG-HGUT-00189	Coprococcus sp900066115	SAMN09734286	PRJNA482748	China	Asia	ftp://ftp.ebi.ac.uk/pub/databases/metagenomics/mgnify_genomes/human-gut/v1.0/all_genomes/MGYG-HGUT-001/MGYG-HGUT-00189/genomes1/GUT_GENOME000859.gff.gz		4
GUT_GENOME000864	AF15-41	CGR	Isolate	2747646	51	129235	40.98	99.33	0.67		0	99.74	99.79	20	GCA_003604095	GUT_GENOME001027	MGYG-HGUT-00189	Coprococcus sp000154245	SAMN09734290	PRJNA482748	China	Asia	ftp://ftp.ebi.ac.uk/pub/databases/metagenomics/mgnify_genomes/human-gut/v1.0/all_genomes/MGYG-HGUT-001/MGYG-HGUT-00189/genomes1/GUT_GENOME000864.gff.gz		5
GUT_GENOME000882	AF16-22	CGR	Isolate	2994972	47	256126	43.94	99.33	0		0	99.74	98.19	20	GCA_003461545	GUT_GENOME001379	MGYG-HGUT-00231	Coprococcus eutactus_A	SAMN09734307	PRJNA482748	China	Asia	ftp://ftp.ebi.ac.uk/pub/databases/metagenomics/mgnify_genomes/human-gut/v1.0/all_genomes/MGYG-HGUT-002/MGYG-HGUT-00231/genomes3/GUT_GENOME000882.gff.gz		2
GUT_GENOME000886	AF16-31	CGR	Isolate	3424695	77	130776	42.19	99.42	0		0	99.67	99.62	20	GCA_003462725	GUT_GENOME095993	MGYG-HGUT-01315	Coprococcus comes	SAMN09734312	PRJNA482748	China	Asia	ftp://ftp.ebi.ac.uk/pub/databases/metagenomics/mgnify_genomes/human-gut/v1.0/all_genomes/MGYG-HGUT-013/MGYG-HGUT-01315/genomes1/GUT_GENOME000886.gff.gz		3
GUT_GENOME000892	AF16-5	CGR	Isolate	3249827	29	524783	43.83	99.33	0		0	99.74	99.79	20	GCA_003479365	GUT_GENOME001379	MGYG-HGUT-00231	Coprococcus eutactus_A	SAMN09734317	PRJNA482748	China	Asia	ftp://ftp.ebi.ac.uk/pub/databases/metagenomics/mgnify_genomes/human-gut/v1.0/all_genomes/MGYG-HGUT-002/MGYG-HGUT-00231/genomes2/GUT_GENOME000892.gff.gz		2
GUT_GENOME000905	AF17-21AC	CGR	Isolate	2814157	17	395388	41.3	99.33	0		0	94.06	99.79	20	GCA_003461365	GUT_GENOME001027	MGYG-HGUT-00189	Coprococcus sp900066115	SAMN09734332	PRJNA482748	China	Asia	ftp://ftp.ebi.ac.uk/pub/databases/metagenomics/mgnify_genomes/human-gut/v1.0/all_genomes/MGYG-HGUT-001/MGYG-HGUT-00189/genomes2/GUT_GENOME000905.gff.gz		4
GUT_GENOME000911	AF17-2	CGR	Isolate	2805167	24	395087	41.31	99.33	0		0	99.74	99.79	20	GCA_003479215	GUT_GENOME001027	MGYG-HGUT-00189	Coprococcus sp900066115	SAMN09734329	PRJNA482748	China	Asia	ftp://ftp.ebi.ac.uk/pub/databases/metagenomics/mgnify_genomes/human-gut/v1.0/all_genomes/MGYG-HGUT-001/MGYG-HGUT-00189/genomes1/GUT_GENOME000911.gff.gz		4
GUT_GENOME000923	AF18-12LB	CGR	Isolate	3160527	80	123576	42.21	99.42	0		0	99.67	99.62	20	GCA_003460315	GUT_GENOME095993	MGYG-HGUT-01315	Coprococcus comes	SAMN09734350	PRJNA482748	China	Asia	ftp://ftp.ebi.ac.uk/pub/databases/metagenomics/mgnify_genomes/human-gut/v1.0/all_genomes/MGYG-HGUT-013/MGYG-HGUT-01315/genomes1/GUT_GENOME000923.gff.gz		3
GUT_GENOME000977	AF19-8AC	CGR	Isolate	3084487	20	776503	43.55	99.33	0		0	99.74	99.79	19	GCA_003603115	GUT_GENOME001379	MGYG-HGUT-00231	Coprococcus eutactus_A	SAMN09734404	PRJNA482748	China	Asia	ftp://ftp.ebi.ac.uk/pub/databases/metagenomics/mgnify_genomes/human-gut/v1.0/all_genomes/MGYG-HGUT-002/MGYG-HGUT-00231/genomes3/GUT_GENOME000977.gff.gz		2
GUT_GENOME001027	AF23-6LB	CGR	Isolate	2889110	11	578091	41.5	99.33	0		0	99.74	99.79	20	GCA_003461085	GUT_GENOME001027	MGYG-HGUT-00189	Coprococcus sp900066115	SAMN09734454	PRJNA482748	China	Asia	ftp://ftp.ebi.ac.uk/pub/databases/metagenomics/mgnify_genomes/human-gut/v1.0/all_genomes/MGYG-HGUT-001/MGYG-HGUT-00189/genomes1/GUT_GENOME001027.gff.gz		4
GUT_GENOME001247	AF38-1	CGR	Isolate	3206388	22	308166	43.74	99.33	0.34		0	99.74	99.79	20	GCA_003603945	GUT_GENOME001379	MGYG-HGUT-00231	Coprococcus eutactus_A	SAMN09734672	PRJNA482748	China	Asia	ftp://ftp.ebi.ac.uk/pub/databases/metagenomics/mgnify_genomes/human-gut/v1.0/all_genomes/MGYG-HGUT-002/MGYG-HGUT-00231/genomes1/GUT_GENOME001247.gff.gz		2
GUT_GENOME001379	AM14-16	CGR	Isolate	3050335	21	729345	43.8	99.33	0		0	99.74	99.79	20	GCA_003434675	GUT_GENOME001379	MGYG-HGUT-00231	Coprococcus eutactus_A	SAMN09734806	PRJNA482748	China	Asia	ftp://ftp.ebi.ac.uk/pub/databases/metagenomics/mgnify_genomes/human-gut/v1.0/all_genomes/MGYG-HGUT-002/MGYG-HGUT-00231/genomes1/GUT_GENOME001379.gff.gz		2
GUT_GENOME001472	AM22-12LB	CGR	Isolate	3512905	69	144196	43.06	99.42	0.19		0	99.67	99.62	20	GCA_003471185	GUT_GENOME095993	MGYG-HGUT-01315	Coprococcus comes	SAMN09734899	PRJNA482748	China	Asia	ftp://ftp.ebi.ac.uk/pub/databases/metagenomics/mgnify_genomes/human-gut/v1.0/all_genomes/MGYG-HGUT-013/MGYG-HGUT-01315/genomes1/GUT_GENOME001472.gff.gz		3
GUT_GENOME001513	AM23-3	CGR	Isolate	3609474	173	100297	42.61	99.42	0		90.76	99.67	99.62	20	GCA_003470335	GUT_GENOME095993	MGYG-HGUT-01315	Coprococcus comes	SAMN09736290	PRJNA482748	China	Asia	ftp://ftp.ebi.ac.uk/pub/databases/metagenomics/mgnify_genomes/human-gut/v1.0/all_genomes/MGYG-HGUT-013/MGYG-HGUT-01315/genomes1/GUT_GENOME001513.gff.gz		3
GUT_GENOME001816	AM46-21	CGR	Isolate	2975904	34	142281	41.31	98.66	0		0	99.74	99.79	20	GCA_003480025	GUT_GENOME001027	MGYG-HGUT-00189	Coprococcus sp900066115	SAMN09736593	PRJNA482748	China	Asia	ftp://ftp.ebi.ac.uk/pub/databases/metagenomics/mgnify_genomes/human-gut/v1.0/all_genomes/MGYG-HGUT-001/MGYG-HGUT-00189/genomes1/GUT_GENOME001816.gff.gz		4
GUT_GENOME001857	AM54-14XD	CGR	Isolate	2817668	31	221088	41.21	96.98	0		0	99.74	99.79	19	GCA_003478235	GUT_GENOME001027	MGYG-HGUT-00189	Coprococcus sp900066115	SAMN09736634	PRJNA482748	China	Asia	ftp://ftp.ebi.ac.uk/pub/databases/metagenomics/mgnify_genomes/human-gut/v1.0/all_genomes/MGYG-HGUT-001/MGYG-HGUT-00189/genomes1/GUT_GENOME001857.gff.gz		4
GUT_GENOME001864	AM54-37XD	CGR	Isolate	2819421	29	228263	41.2	96.98	0		0	99.74	99.79	17	GCA_003478225	GUT_GENOME001027	MGYG-HGUT-00189	Coprococcus sp900066115	SAMN09736641	PRJNA482748	China	Asia	ftp://ftp.ebi.ac.uk/pub/databases/metagenomics/mgnify_genomes/human-gut/v1.0/all_genomes/MGYG-HGUT-001/MGYG-HGUT-00189/genomes1/GUT_GENOME001864.gff.gz		4
GUT_GENOME002000	AsnicarF_2017__MV_FEM5_t1Q14__bin.31	CIBIO	MAG	2895211	24	182435	43.91	99.33	0		0	45.6	5.44	14		GUT_GENOME001379	MGYG-HGUT-00231	Coprococcus eutactus_A	SRS1634640	SRP082656	Italy	Europe	ftp://ftp.ebi.ac.uk/pub/databases/metagenomics/mgnify_genomes/human-gut/v1.0/all_genomes/MGYG-HGUT-002/MGYG-HGUT-00231/genomes3/GUT_GENOME002000.gff.gz		2
GUT_GENOME002014	AsnicarF_2017__MV_FEM5_t3Q15__bin.31	CIBIO	MAG	2775713	71	65409	44.33	99.33	0.22		0	0	41.81	17		GUT_GENOME001379	MGYG-HGUT-00231	Coprococcus eutactus_A	SRS1634642	SRP082656	Italy	Europe	ftp://ftp.ebi.ac.uk/pub/databases/metagenomics/mgnify_genomes/human-gut/v1.0/all_genomes/MGYG-HGUT-002/MGYG-HGUT-00231/genomes1/GUT_GENOME002014.gff.gz		2
GUT_GENOME002147	BackhedF_2015__SID105_M__bin.3	CIBIO	MAG	2575936	32	141475	41.18	97.32	0		0	0	0	16		GUT_GENOME001027	MGYG-HGUT-00189	Coprococcus sp000154245	ERS473032	ERP005989	Denmark	Europe	ftp://ftp.ebi.ac.uk/pub/databases/metagenomics/mgnify_genomes/human-gut/v1.0/all_genomes/MGYG-HGUT-001/MGYG-HGUT-00189/genomes2/GUT_GENOME002147.gff.gz		5
GUT_GENOME003034	BackhedF_2015__SID1_M__bin.54	CIBIO	MAG	2640778	44	89097	41.31	99.33	0		0	0	14.53	18		GUT_GENOME001027	MGYG-HGUT-00189	Coprococcus sp900066115	ERS473094	ERP005989	Denmark	Europe	ftp://ftp.ebi.ac.uk/pub/databases/metagenomics/mgnify_genomes/human-gut/v1.0/all_genomes/MGYG-HGUT-001/MGYG-HGUT-00189/genomes2/GUT_GENOME003034.gff.gz		4
GUT_GENOME003464	BackhedF_2015__SID26_12M__bin.43	CIBIO	MAG	2781487	70	64529	44.27	99.33	0.22		0	0	0	16		GUT_GENOME001379	MGYG-HGUT-00231	Coprococcus eutactus_A	ERS473135	ERP005989	Denmark	Europe	ftp://ftp.ebi.ac.uk/pub/databases/metagenomics/mgnify_genomes/human-gut/v1.0/all_genomes/MGYG-HGUT-002/MGYG-HGUT-00231/genomes4/GUT_GENOME003464.gff.gz		2
GUT_GENOME003630	BackhedF_2015__SID268_M__bin.19	CIBIO	MAG	2811718	26	159386	44.14	99.33	0		0	22.9	0	18		GUT_GENOME001379	MGYG-HGUT-00231	Coprococcus eutactus_A	ERS473148	ERP005989	Sweden	Europe	ftp://ftp.ebi.ac.uk/pub/databases/metagenomics/mgnify_genomes/human-gut/v1.0/all_genomes/MGYG-HGUT-002/MGYG-HGUT-00231/genomes1/GUT_GENOME003630.gff.gz		2
GUT_GENOME003942	BackhedF_2015__SID281_M__bin.43	CIBIO	MAG	2969719	51	119968	42.72	99.33	0.31		0	0	0	16		GUT_GENOME000055	MGYG-HGUT-00018	Coprococcus eutactus	ERS473170	ERP005989	Sweden	Europe	ftp://ftp.ebi.ac.uk/pub/databases/metagenomics/mgnify_genomes/human-gut/v1.0/all_genomes/MGYG-HGUT-000/MGYG-HGUT-00018/genomes1/GUT_GENOME003942.gff.gz		1
GUT_GENOME004204	BackhedF_2015__SID338_M__bin.29	CIBIO	MAG	2852687	66	61289	44.29	97.32	0.34		0	0	0	15		GUT_GENOME001379	MGYG-HGUT-00231	Coprococcus eutactus_A	ERS473190	ERP005989	Denmark	Europe	ftp://ftp.ebi.ac.uk/pub/databases/metagenomics/mgnify_genomes/human-gut/v1.0/all_genomes/MGYG-HGUT-002/MGYG-HGUT-00231/genomes2/GUT_GENOME004204.gff.gz		2
GUT_GENOME004824	BackhedF_2015__SID397_M__bin.34	CIBIO	MAG	2588878	25	261478	41.29	99.33	0		0	72.02	0	18		GUT_GENOME001027	MGYG-HGUT-00189	Coprococcus sp900066115	ERS473236	ERP005989	Sweden	Europe	ftp://ftp.ebi.ac.uk/pub/databases/metagenomics/mgnify_genomes/human-gut/v1.0/all_genomes/MGYG-HGUT-001/MGYG-HGUT-00189/genomes1/GUT_GENOME004824.gff.gz		4
GUT_GENOME004884	BackhedF_2015__SID39_M__bin.63	CIBIO	MAG	2577718	39	121775	40.99	99.33	0		0	0	10.74	15		GUT_GENOME001027	MGYG-HGUT-00189	Coprococcus sp000154245	ERS473238	ERP005989	Denmark	Europe	ftp://ftp.ebi.ac.uk/pub/databases/metagenomics/mgnify_genomes/human-gut/v1.0/all_genomes/MGYG-HGUT-001/MGYG-HGUT-00189/genomes2/GUT_GENOME004884.gff.gz		5
GUT_GENOME004978	BackhedF_2015__SID45_M__bin.17	CIBIO	MAG	2512422	78	62902	41.36	97.99	0.69		0	0	5.78	15		GUT_GENOME001027	MGYG-HGUT-00189	Coprococcus sp900066115	ERS473246	ERP005989	Sweden	Europe	ftp://ftp.ebi.ac.uk/pub/databases/metagenomics/mgnify_genomes/human-gut/v1.0/all_genomes/MGYG-HGUT-001/MGYG-HGUT-00189/genomes1/GUT_GENOME004978.gff.gz		4
GUT_GENOME005303	BackhedF_2015__SID51_M__bin.5	CIBIO	MAG	2638616	81	57417	44.52	97.65	0.89		0	0	14.53	18		GUT_GENOME001379	MGYG-HGUT-00231	Coprococcus eutactus_A	ERS473266	ERP005989	Sweden	Europe	ftp://ftp.ebi.ac.uk/pub/databases/metagenomics/mgnify_genomes/human-gut/v1.0/all_genomes/MGYG-HGUT-002/MGYG-HGUT-00231/genomes1/GUT_GENOME005303.gff.gz		2
GUT_GENOME005738	BackhedF_2015__SID549_M__bin.19	CIBIO	MAG	3162936	22	206808	43.79	97.32	0.34		0	0	0	18		GUT_GENOME001379	MGYG-HGUT-00231	Coprococcus eutactus_A	ERS473302	ERP005989	Sweden	Europe	ftp://ftp.ebi.ac.uk/pub/databases/metagenomics/mgnify_genomes/human-gut/v1.0/all_genomes/MGYG-HGUT-002/MGYG-HGUT-00231/genomes2/GUT_GENOME005738.gff.gz		2
GUT_GENOME006102	BackhedF_2015__SID577_M__bin.50	CIBIO	MAG	2933466	34	121108	44.16	99.33	0		0	24.92	0	17		GUT_GENOME001379	MGYG-HGUT-00231	Coprococcus eutactus_A	ERS473330	ERP005989	Sweden	Europe	ftp://ftp.ebi.ac.uk/pub/databases/metagenomics/mgnify_genomes/human-gut/v1.0/all_genomes/MGYG-HGUT-002/MGYG-HGUT-00231/genomes2/GUT_GENOME006102.gff.gz		2
GUT_GENOME006175	BackhedF_2015__SID585_12M__bin.18	CIBIO	MAG	2795179	43	119671	43.2	95.97	0.67		0	31.83	0	17		GUT_GENOME000055	MGYG-HGUT-00018	Coprococcus eutactus	ERS473335	ERP005989	Sweden	Europe	ftp://ftp.ebi.ac.uk/pub/databases/metagenomics/mgnify_genomes/human-gut/v1.0/all_genomes/MGYG-HGUT-000/MGYG-HGUT-00018/genomes1/GUT_GENOME006175.gff.gz		1
GUT_GENOME007468	Bengtsson-PalmeJ_2015__TRAVELRES10__bin.78	CIBIO	MAG	2606701	24	178808	41.23	99.33	0		0	0	0	18		GUT_GENOME001027	MGYG-HGUT-00189	Coprococcus sp900066115	ERS554201	ERP007090	Sweden	Europe	ftp://ftp.ebi.ac.uk/pub/databases/metagenomics/mgnify_genomes/human-gut/v1.0/all_genomes/MGYG-HGUT-001/MGYG-HGUT-00189/genomes1/GUT_GENOME007468.gff.gz		4
GUT_GENOME007729	Bengtsson-PalmeJ_2015__TRAVELRES15__bin.33	CIBIO	MAG	2515993	40	95093	41.25	99.33	0		0	0	0	13		GUT_GENOME001027	MGYG-HGUT-00189	Coprococcus sp000154245	ERS554206	ERP007090	Sweden	Europe	ftp://ftp.ebi.ac.uk/pub/databases/metagenomics/mgnify_genomes/human-gut/v1.0/all_genomes/MGYG-HGUT-001/MGYG-HGUT-00189/genomes1/GUT_GENOME007729.gff.gz		5
GUT_GENOME007858	Bengtsson-PalmeJ_2015__TRAVELRES17__bin.52	CIBIO	MAG	3039243	33	167372	42.27	98.66	0		0	0	0	18		GUT_GENOME007858	MGYG-HGUT-00364	Coprococcus sp.	ERS554208	ERP007090	Sweden	Europe	ftp://ftp.ebi.ac.uk/pub/databases/metagenomics/mgnify_genomes/human-gut/v1.0/all_genomes/MGYG-HGUT-003/MGYG-HGUT-00364/genomes1/GUT_GENOME007858.gff.gz		6
GUT_GENOME008526	Bengtsson-PalmeJ_2015__TRAVELRES28__bin.39	CIBIO	MAG	2610709	98	40783	44.36	96.23	0		0	0	0	13		GUT_GENOME001379	MGYG-HGUT-00231	Coprococcus eutactus_A	ERS554219	ERP007090	Sweden	Europe	ftp://ftp.ebi.ac.uk/pub/databases/metagenomics/mgnify_genomes/human-gut/v1.0/all_genomes/MGYG-HGUT-002/MGYG-HGUT-00231/genomes1/GUT_GENOME008526.gff.gz		2
GUT_GENOME008609	Bengtsson-PalmeJ_2015__TRAVELRES29__bin.89	CIBIO	MAG	2839050	42	87473	43.03	99.33	0		0	0	0	15		GUT_GENOME000055	MGYG-HGUT-00018	Coprococcus eutactus	ERS554220	ERP007090	Sweden	Europe	ftp://ftp.ebi.ac.uk/pub/databases/metagenomics/mgnify_genomes/human-gut/v1.0/all_genomes/MGYG-HGUT-000/MGYG-HGUT-00018/genomes1/GUT_GENOME008609.gff.gz		1
GUT_GENOME008774	Bengtsson-PalmeJ_2015__TRAVELRES31__bin.73	CIBIO	MAG	2859914	24	187331	44.18	99.33	0		0	0	0	18		GUT_GENOME001379	MGYG-HGUT-00231	Coprococcus eutactus_A	ERS554222	ERP007090	Sweden	Europe	ftp://ftp.ebi.ac.uk/pub/databases/metagenomics/mgnify_genomes/human-gut/v1.0/all_genomes/MGYG-HGUT-002/MGYG-HGUT-00231/genomes3/GUT_GENOME008774.gff.gz		2
GUT_GENOME008940	Bengtsson-PalmeJ_2015__TRAVELRES35__bin.63	CIBIO	MAG	2676328	52	96621	41	97.65	0.04		0	15.79	0	14		GUT_GENOME001027	MGYG-HGUT-00189	Coprococcus sp000154245	ERS554226	ERP007090	Sweden	Europe	ftp://ftp.ebi.ac.uk/pub/databases/metagenomics/mgnify_genomes/human-gut/v1.0/all_genomes/MGYG-HGUT-001/MGYG-HGUT-00189/genomes1/GUT_GENOME008940.gff.gz		5
GUT_GENOME008999	Bengtsson-PalmeJ_2015__TRAVELRES36__bin.60	CIBIO	MAG	2753284	90	48542	44.29	97.45	0.67		0	0	5.37	16		GUT_GENOME001379	MGYG-HGUT-00231	Coprococcus eutactus_A	ERS554227	ERP007090	Sweden	Europe	ftp://ftp.ebi.ac.uk/pub/databases/metagenomics/mgnify_genomes/human-gut/v1.0/all_genomes/MGYG-HGUT-002/MGYG-HGUT-00231/genomes3/GUT_GENOME008999.gff.gz		2
GUT_GENOME009003	Bengtsson-PalmeJ_2015__TRAVELRES36__bin.69	CIBIO	MAG	2652164	35	131831	41.03	99.33	0		0	0	0	16		GUT_GENOME001027	MGYG-HGUT-00189	Coprococcus sp000154245	ERS554227	ERP007090	Sweden	Europe	ftp://ftp.ebi.ac.uk/pub/databases/metagenomics/mgnify_genomes/human-gut/v1.0/all_genomes/MGYG-HGUT-001/MGYG-HGUT-00189/genomes1/GUT_GENOME009003.gff.gz		5
GUT_GENOME009151	Bengtsson-PalmeJ_2015__TRAVELRES39__bin.79	CIBIO	MAG	2669995	26	133769	41.34	99.33	0.02		0	0	0	16		GUT_GENOME001027	MGYG-HGUT-00189	Coprococcus sp900066115	ERS554230	ERP007090	Sweden	Europe	ftp://ftp.ebi.ac.uk/pub/databases/metagenomics/mgnify_genomes/human-gut/v1.0/all_genomes/MGYG-HGUT-001/MGYG-HGUT-00189/genomes1/GUT_GENOME009151.gff.gz		4
GUT_GENOME009179	Bengtsson-PalmeJ_2015__TRAVELRES3__bin.45	CIBIO	MAG	2821634	19	210131	44.16	99.33	0		0	0	0	19		GUT_GENOME001379	MGYG-HGUT-00231	Coprococcus eutactus_A	ERS554194	ERP007090	Sweden	Europe	ftp://ftp.ebi.ac.uk/pub/databases/metagenomics/mgnify_genomes/human-gut/v1.0/all_genomes/MGYG-HGUT-002/MGYG-HGUT-00231/genomes1/GUT_GENOME009179.gff.gz		2
GUT_GENOME009244	Bengtsson-PalmeJ_2015__TRAVELRES40__bin.42	CIBIO	MAG	2678705	36	129621	41.31	99.33	0.34		0	0	12.1	14		GUT_GENOME001027	MGYG-HGUT-00189	Coprococcus sp900066115	ERS554231	ERP007090	Sweden	Europe	ftp://ftp.ebi.ac.uk/pub/databases/metagenomics/mgnify_genomes/human-gut/v1.0/all_genomes/MGYG-HGUT-001/MGYG-HGUT-00189/genomes2/GUT_GENOME009244.gff.gz		4
GUT_GENOME009318	Bengtsson-PalmeJ_2015__TRAVELRES41__bin.90	CIBIO	MAG	2910629	21	311599	43.06	98.99	0		0	0	0	18		GUT_GENOME000055	MGYG-HGUT-00018	Coprococcus eutactus	ERS554232	ERP007090	Sweden	Europe	ftp://ftp.ebi.ac.uk/pub/databases/metagenomics/mgnify_genomes/human-gut/v1.0/all_genomes/MGYG-HGUT-000/MGYG-HGUT-00018/genomes1/GUT_GENOME009318.gff.gz		1
GUT_GENOME009417	Bengtsson-PalmeJ_2015__TRAVELRES45__bin.108	CIBIO	MAG	2579028	25	239588	41.49	98.41	0		0	0	22.97	15		GUT_GENOME001027	MGYG-HGUT-00189	Coprococcus sp900066115	ERS554236	ERP007090	Sweden	Europe	ftp://ftp.ebi.ac.uk/pub/databases/metagenomics/mgnify_genomes/human-gut/v1.0/all_genomes/MGYG-HGUT-001/MGYG-HGUT-00189/genomes1/GUT_GENOME009417.gff.gz		4
GUT_GENOME009920	Bengtsson-PalmeJ_2015__TRAVELRES51__bin.40	CIBIO	MAG	2909783	41	111725	42.95	99.33	0		0	0	11.21	17		GUT_GENOME000055	MGYG-HGUT-00018	Coprococcus eutactus	ERS554242	ERP007090	Sweden	Europe	ftp://ftp.ebi.ac.uk/pub/databases/metagenomics/mgnify_genomes/human-gut/v1.0/all_genomes/MGYG-HGUT-000/MGYG-HGUT-00018/genomes1/GUT_GENOME009920.gff.gz		1
GUT_GENOME010082	Bengtsson-PalmeJ_2015__TRAVELRES55__bin.133	CIBIO	MAG	2847081	34	159313	44.19	99.33	0		0	9.26	0	19		GUT_GENOME001379	MGYG-HGUT-00231	Coprococcus eutactus_A	ERS554246	ERP007090	Sweden	Europe	ftp://ftp.ebi.ac.uk/pub/databases/metagenomics/mgnify_genomes/human-gut/v1.0/all_genomes/MGYG-HGUT-002/MGYG-HGUT-00231/genomes2/GUT_GENOME010082.gff.gz		2
GUT_GENOME010147	Bengtsson-PalmeJ_2015__TRAVELRES56__bin.64	CIBIO	MAG	2938957	37	151040	44.12	99.33	0.34		0	9.39	5.44	16		GUT_GENOME001379	MGYG-HGUT-00231	Coprococcus eutactus_A	ERS554247	ERP007090	Sweden	Europe	ftp://ftp.ebi.ac.uk/pub/databases/metagenomics/mgnify_genomes/human-gut/v1.0/all_genomes/MGYG-HGUT-002/MGYG-HGUT-00231/genomes1/GUT_GENOME010147.gff.gz		2
GUT_GENOME010279	Bengtsson-PalmeJ_2015__TRAVELRES59__bin.59	CIBIO	MAG	2942984	22	210195	44.06	99.33	0.67		0	0	0	17		GUT_GENOME001379	MGYG-HGUT-00231	Coprococcus eutactus_A	ERS554250	ERP007090	Sweden	Europe	ftp://ftp.ebi.ac.uk/pub/databases/metagenomics/mgnify_genomes/human-gut/v1.0/all_genomes/MGYG-HGUT-002/MGYG-HGUT-00231/genomes1/GUT_GENOME010279.gff.gz		2
GUT_GENOME010375	Bengtsson-PalmeJ_2015__TRAVELRES60__bin.50	CIBIO	MAG	2933736	26	159685	44.07	99.33	0		0	0	0	16		GUT_GENOME001379	MGYG-HGUT-00231	Coprococcus eutactus_A	ERS554251	ERP007090	Sweden	Europe	ftp://ftp.ebi.ac.uk/pub/databases/metagenomics/mgnify_genomes/human-gut/v1.0/all_genomes/MGYG-HGUT-002/MGYG-HGUT-00231/genomes2/GUT_GENOME010375.gff.gz		2
GUT_GENOME010670	Bengtsson-PalmeJ_2015__TRAVELRES67__bin.35	CIBIO	MAG	2884593	21	196625	44.01	99.33	0		0	0	0	19		GUT_GENOME001379	MGYG-HGUT-00231	Coprococcus eutactus_A	ERS554258	ERP007090	Sweden	Europe	ftp://ftp.ebi.ac.uk/pub/databases/metagenomics/mgnify_genomes/human-gut/v1.0/all_genomes/MGYG-HGUT-002/MGYG-HGUT-00231/genomes4/GUT_GENOME010670.gff.gz		2
GUT_GENOME010758	Bengtsson-PalmeJ_2015__TRAVELRES69__bin.53	CIBIO	MAG	2885873	34	142373	44.1	99.33	0		0	18.66	0	16		GUT_GENOME001379	MGYG-HGUT-00231	Coprococcus eutactus_A	ERS554260	ERP007090	Sweden	Europe	ftp://ftp.ebi.ac.uk/pub/databases/metagenomics/mgnify_genomes/human-gut/v1.0/all_genomes/MGYG-HGUT-002/MGYG-HGUT-00231/genomes3/GUT_GENOME010758.gff.gz		2
GUT_GENOME010860	Bengtsson-PalmeJ_2015__TRAVELRES70__bin.35	CIBIO	MAG	2892682	30	202250	44.07	99.33	0.02		0	0	0	18		GUT_GENOME001379	MGYG-HGUT-00231	Coprococcus eutactus_A	ERS554261	ERP007090	Sweden	Europe	ftp://ftp.ebi.ac.uk/pub/databases/metagenomics/mgnify_genomes/human-gut/v1.0/all_genomes/MGYG-HGUT-002/MGYG-HGUT-00231/genomes2/GUT_GENOME010860.gff.gz		2
GUT_GENOME011068	Bengtsson-PalmeJ_2015__TRAVELRES9__bin.85	CIBIO	MAG	2655538	31	127780	41.16	99.33	0		0	0	14.77	16		GUT_GENOME001027	MGYG-HGUT-00189	Coprococcus sp900066115	ERS554200	ERP007090	Sweden	Europe	ftp://ftp.ebi.ac.uk/pub/databases/metagenomics/mgnify_genomes/human-gut/v1.0/all_genomes/MGYG-HGUT-001/MGYG-HGUT-00189/genomes2/GUT_GENOME011068.gff.gz		4
GUT_GENOME011375	BritoIL_2016__M1.24.ST__bin.68	CIBIO	MAG	2822127	91	48300	42.88	99.33	0.69		0	0	0	16		GUT_GENOME105828	MGYG-HGUT-01745	Coprococcus sp.	SRS475651	SRP029441	Fiji	Oceania	ftp://ftp.ebi.ac.uk/pub/databases/metagenomics/mgnify_genomes/human-gut/v1.0/all_genomes/MGYG-HGUT-017/MGYG-HGUT-01745/genomes1/GUT_GENOME011375.gff.gz		7
GUT_GENOME011466	BritoIL_2016__M1.27.ST__bin.52	CIBIO	MAG	2576875	71	71670	41.08	97.92	0.67		0	0	0	12		GUT_GENOME001027	MGYG-HGUT-00189	Coprococcus sp000154245	SRS476430	SRP029441	Fiji	Oceania	ftp://ftp.ebi.ac.uk/pub/databases/metagenomics/mgnify_genomes/human-gut/v1.0/all_genomes/MGYG-HGUT-001/MGYG-HGUT-00189/genomes1/GUT_GENOME011466.gff.gz		5
GUT_GENOME011628	BritoIL_2016__M1.38.ST__bin.46	CIBIO	MAG	2887132	38	161457	43.98	98.32	0		0	0	0	17		GUT_GENOME001379	MGYG-HGUT-00231	Coprococcus eutactus_A	SRS476141	SRP029441	Fiji	Oceania	ftp://ftp.ebi.ac.uk/pub/databases/metagenomics/mgnify_genomes/human-gut/v1.0/all_genomes/MGYG-HGUT-002/MGYG-HGUT-00231/genomes3/GUT_GENOME011628.gff.gz		2
GUT_GENOME012076	BritoIL_2016__M1.64.ST__bin.63	CIBIO	MAG	2765060	43	100102	40.97	99.33	0		0	0	0	15		GUT_GENOME001027	MGYG-HGUT-00189	Coprococcus sp000154245	SRS476274	SRP029441	Fiji	Oceania	ftp://ftp.ebi.ac.uk/pub/databases/metagenomics/mgnify_genomes/human-gut/v1.0/all_genomes/MGYG-HGUT-001/MGYG-HGUT-00189/genomes1/GUT_GENOME012076.gff.gz		5
GUT_GENOME012305	BritoIL_2016__M2.37.ST__bin.77	CIBIO	MAG	2819005	103	45042	44.09	98.66	0.17		0	0	0	13		GUT_GENOME001379	MGYG-HGUT-00231	Coprococcus eutactus_A	SRS476262	SRP029441	Fiji	Oceania	ftp://ftp.ebi.ac.uk/pub/databases/metagenomics/mgnify_genomes/human-gut/v1.0/all_genomes/MGYG-HGUT-002/MGYG-HGUT-00231/genomes1/GUT_GENOME012305.gff.gz		2
GUT_GENOME012444	BritoIL_2016__M2.40.ST__bin.41	CIBIO	MAG	2539253	38	99513	41.26	98.66	0		0	0	0	15		GUT_GENOME001027	MGYG-HGUT-00189	Coprococcus sp900066115	SRS475546	SRP029441	Fiji	Oceania	ftp://ftp.ebi.ac.uk/pub/databases/metagenomics/mgnify_genomes/human-gut/v1.0/all_genomes/MGYG-HGUT-001/MGYG-HGUT-00189/genomes2/GUT_GENOME012444.gff.gz		4
GUT_GENOME012554	BritoIL_2016__M2.45.ST__bin.48	CIBIO	MAG	2793331	187	23148	43.12	96.5	0.34		0	0	0	17		GUT_GENOME000055	MGYG-HGUT-00018	Coprococcus eutactus	SRS475920	SRP029441	Fiji	Oceania	ftp://ftp.ebi.ac.uk/pub/databases/metagenomics/mgnify_genomes/human-gut/v1.0/all_genomes/MGYG-HGUT-000/MGYG-HGUT-00018/genomes1/GUT_GENOME012554.gff.gz		1
GUT_GENOME012685	BritoIL_2016__M2.50.ST__bin.36	CIBIO	MAG	2480543	24	234233	41.76	99.33	0		0	0	14.53	17		GUT_GENOME140272	MGYG-HGUT-02289	Coprococcus sp000433075	SRS475682	SRP029441	Fiji	Oceania	ftp://ftp.ebi.ac.uk/pub/databases/metagenomics/mgnify_genomes/human-gut/v1.0/all_genomes/MGYG-HGUT-022/MGYG-HGUT-02289/genomes1/GUT_GENOME012685.gff.gz		8
GUT_GENOME012713	BritoIL_2016__M2.51.ST__bin.3	CIBIO	MAG	2953280	28	186380	43.84	99.16	0.34		0	0	0	16		GUT_GENOME001379	MGYG-HGUT-00231	Coprococcus eutactus_A	SRS476050	SRP029441	Fiji	Oceania	ftp://ftp.ebi.ac.uk/pub/databases/metagenomics/mgnify_genomes/human-gut/v1.0/all_genomes/MGYG-HGUT-002/MGYG-HGUT-00231/genomes3/GUT_GENOME012713.gff.gz		2
GUT_GENOME013064	BritoIL_2016__W1.1.ST__bin.99	CIBIO	MAG	2322179	71	51495	42.01	98.32	0		0	0	0	14		GUT_GENOME140272	MGYG-HGUT-02289	Coprococcus sp000433075	SRS476035	SRP029441	Fiji	Oceania	ftp://ftp.ebi.ac.uk/pub/databases/metagenomics/mgnify_genomes/human-gut/v1.0/all_genomes/MGYG-HGUT-022/MGYG-HGUT-02289/genomes1/GUT_GENOME013064.gff.gz		8
GUT_GENOME013183	BritoIL_2016__W1.27.ST__bin.29	CIBIO	MAG	2398293	25	198187	41.78	99.33	0		0	0	0	15		GUT_GENOME140272	MGYG-HGUT-02289	Coprococcus sp000433075	SRS475981	SRP029441	Fiji	Oceania	ftp://ftp.ebi.ac.uk/pub/databases/metagenomics/mgnify_genomes/human-gut/v1.0/all_genomes/MGYG-HGUT-022/MGYG-HGUT-02289/genomes1/GUT_GENOME013183.gff.gz		8
GUT_GENOME013190	BritoIL_2016__W1.27.ST__bin.45	CIBIO	MAG	2686789	33	144224	44.32	98.29	0		0	0	0	14		GUT_GENOME001379	MGYG-HGUT-00231	Coprococcus eutactus_A	SRS475981	SRP029441	Fiji	Oceania	ftp://ftp.ebi.ac.uk/pub/databases/metagenomics/mgnify_genomes/human-gut/v1.0/all_genomes/MGYG-HGUT-002/MGYG-HGUT-00231/genomes3/GUT_GENOME013190.gff.gz		2
GUT_GENOME013574	BritoIL_2016__W1.44.ST__bin.5	CIBIO	MAG	2929243	69	59492	42.85	97.44	0		0	0	0	19		GUT_GENOME105828	MGYG-HGUT-01745	Coprococcus sp.	SRS475631	SRP029441	Fiji	Oceania	ftp://ftp.ebi.ac.uk/pub/databases/metagenomics/mgnify_genomes/human-gut/v1.0/all_genomes/MGYG-HGUT-017/MGYG-HGUT-01745/genomes1/GUT_GENOME013574.gff.gz		7
GUT_GENOME013680	BritoIL_2016__W1.55.ST__bin.2	CIBIO	MAG	2271650	130	29519	42.07	97.65	0.19		0	0	0	14		GUT_GENOME140272	MGYG-HGUT-02289	Coprococcus sp000433075	SRS475648	SRP029441	Fiji	Oceania	ftp://ftp.ebi.ac.uk/pub/databases/metagenomics/mgnify_genomes/human-gut/v1.0/all_genomes/MGYG-HGUT-022/MGYG-HGUT-02289/genomes1/GUT_GENOME013680.gff.gz		8
GUT_GENOME013742	BritoIL_2016__W1.5.ST__bin.79	CIBIO	MAG	3043509	30	198675	43.79	99.33	0.67		0	46.12	0	17		GUT_GENOME001379	MGYG-HGUT-00231	Coprococcus eutactus_A	SRS475979	SRP029441	Fiji	Oceania	ftp://ftp.ebi.ac.uk/pub/databases/metagenomics/mgnify_genomes/human-gut/v1.0/all_genomes/MGYG-HGUT-002/MGYG-HGUT-00231/genomes3/GUT_GENOME013742.gff.gz		2
GUT_GENOME013755	BritoIL_2016__W1.6.ST__bin.29	CIBIO	MAG	2402423	27	180333	41.99	99.33	0		0	0	14.53	18		GUT_GENOME140272	MGYG-HGUT-02289	Coprococcus sp000433075	SRS476083	SRP029441	Fiji	Oceania	ftp://ftp.ebi.ac.uk/pub/databases/metagenomics/mgnify_genomes/human-gut/v1.0/all_genomes/MGYG-HGUT-022/MGYG-HGUT-02289/genomes1/GUT_GENOME013755.gff.gz		8
GUT_GENOME013826	BritoIL_2016__W1.9.ST__bin.68	CIBIO	MAG	2692013	46	112920	41.21	99.33	0		0	0	11.21	18		GUT_GENOME001027	MGYG-HGUT-00189	Coprococcus sp900066115	SRS476205	SRP029441	Fiji	Oceania	ftp://ftp.ebi.ac.uk/pub/databases/metagenomics/mgnify_genomes/human-gut/v1.0/all_genomes/MGYG-HGUT-001/MGYG-HGUT-00189/genomes2/GUT_GENOME013826.gff.gz		4
GUT_GENOME014076	BritoIL_2016__W2.33.ST__bin.2	CIBIO	MAG	2293938	142	26955	42.04	95.55	0		0	0	0	12		GUT_GENOME140272	MGYG-HGUT-02289	Coprococcus sp000433075	SRS476164	SRP029441	Fiji	Oceania	ftp://ftp.ebi.ac.uk/pub/databases/metagenomics/mgnify_genomes/human-gut/v1.0/all_genomes/MGYG-HGUT-022/MGYG-HGUT-02289/genomes1/GUT_GENOME014076.gff.gz		8
GUT_GENOME014119	BritoIL_2016__W2.34.ST__bin.70	CIBIO	MAG	3091242	31	152324	43.7	98.66	0		0	0	0	15		GUT_GENOME001379	MGYG-HGUT-00231	Coprococcus eutactus_A	SRS475993	SRP029441	Fiji	Oceania	ftp://ftp.ebi.ac.uk/pub/databases/metagenomics/mgnify_genomes/human-gut/v1.0/all_genomes/MGYG-HGUT-002/MGYG-HGUT-00231/genomes2/GUT_GENOME014119.gff.gz		2
GUT_GENOME014142	BritoIL_2016__W2.35.ST__bin.38	CIBIO	MAG	2328665	48	96549	41.98	98.68	0.67		0	0	0	14		GUT_GENOME140272	MGYG-HGUT-02289	Coprococcus sp000433075	SRS475534	SRP029441	Fiji	Oceania	ftp://ftp.ebi.ac.uk/pub/databases/metagenomics/mgnify_genomes/human-gut/v1.0/all_genomes/MGYG-HGUT-022/MGYG-HGUT-02289/genomes1/GUT_GENOME014142.gff.gz		8
GUT_GENOME014339	BritoIL_2016__W2.44.ST__bin.16	CIBIO	MAG	2450111	56	77507	41.31	96.89	0.34		0	0	0	15		GUT_GENOME001027	MGYG-HGUT-00189	Coprococcus sp000154245	SRS476128	SRP029441	Fiji	Oceania	ftp://ftp.ebi.ac.uk/pub/databases/metagenomics/mgnify_genomes/human-gut/v1.0/all_genomes/MGYG-HGUT-001/MGYG-HGUT-00189/genomes1/GUT_GENOME014339.gff.gz		5
GUT_GENOME014389	BritoIL_2016__W2.45.ST__bin.42	CIBIO	MAG	2957658	28	132957	43.81	98.66	0.34		0	0	11.21	16		GUT_GENOME001379	MGYG-HGUT-00231	Coprococcus eutactus_A	SRS475989	SRP029441	Fiji	Oceania	ftp://ftp.ebi.ac.uk/pub/databases/metagenomics/mgnify_genomes/human-gut/v1.0/all_genomes/MGYG-HGUT-002/MGYG-HGUT-00231/genomes3/GUT_GENOME014389.gff.gz		2
GUT_GENOME014540	BritoIL_2016__W2.54.ST__bin.49	CIBIO	MAG	2195135	74	41471	42.11	95.72	0		0	0	0	11		GUT_GENOME140272	MGYG-HGUT-02289	Coprococcus sp000433075	SRS476306	SRP029441	Fiji	Oceania	ftp://ftp.ebi.ac.uk/pub/databases/metagenomics/mgnify_genomes/human-gut/v1.0/all_genomes/MGYG-HGUT-022/MGYG-HGUT-02289/genomes1/GUT_GENOME014540.gff.gz		8
GUT_GENOME014895	BritoIL_2016__W2.8.ST__bin.47	CIBIO	MAG	2655262	150	28999	44.39	95.97	0.89		0	0	0	15		GUT_GENOME001379	MGYG-HGUT-00231	Coprococcus eutactus_A	SRS476185	SRP029441	Fiji	Oceania	ftp://ftp.ebi.ac.uk/pub/databases/metagenomics/mgnify_genomes/human-gut/v1.0/all_genomes/MGYG-HGUT-002/MGYG-HGUT-00231/genomes3/GUT_GENOME014895.gff.gz		2
GUT_GENOME014937	BritoIL_2016__W2.9.ST__bin.4	CIBIO	MAG	2191865	200	16800	42.1	95.26	0.96		0	0	0	15		GUT_GENOME140272	MGYG-HGUT-02289	Coprococcus sp000433075	SRS476104	SRP029441	Fiji	Oceania	ftp://ftp.ebi.ac.uk/pub/databases/metagenomics/mgnify_genomes/human-gut/v1.0/all_genomes/MGYG-HGUT-022/MGYG-HGUT-02289/genomes1/GUT_GENOME014937.gff.gz		8
GUT_GENOME015222	BritoIL_2016__W3.23.ST__bin.74	CIBIO	MAG	3072297	30	229279	40.22	98.6	0.24		0	0	9.3	16		GUT_GENOME001027	MGYG-HGUT-00189	Coprococcus sp900066115	SRS476280	SRP029441	Fiji	Oceania	ftp://ftp.ebi.ac.uk/pub/databases/metagenomics/mgnify_genomes/human-gut/v1.0/all_genomes/MGYG-HGUT-001/MGYG-HGUT-00189/genomes2/GUT_GENOME015222.gff.gz		4
GUT_GENOME015293	BritoIL_2016__WL.13.ST__bin.18	CIBIO	MAG	2610483	47	76686	41.36	99.33	0.22		0	0	0	17		GUT_GENOME001027	MGYG-HGUT-00189	Coprococcus sp900066115	SRS475962	SRP029441	Fiji	Oceania	ftp://ftp.ebi.ac.uk/pub/databases/metagenomics/mgnify_genomes/human-gut/v1.0/all_genomes/MGYG-HGUT-001/MGYG-HGUT-00189/genomes1/GUT_GENOME015293.gff.gz		4
GUT_GENOME015346	BritoIL_2016__WL.14.ST__bin.68	CIBIO	MAG	3048552	48	153337	42.78	98.66	0.02		0	0	0	13		GUT_GENOME000055	MGYG-HGUT-00018	Coprococcus eutactus	SRS475931	SRP029441	Fiji	Oceania	ftp://ftp.ebi.ac.uk/pub/databases/metagenomics/mgnify_genomes/human-gut/v1.0/all_genomes/MGYG-HGUT-000/MGYG-HGUT-00018/genomes1/GUT_GENOME015346.gff.gz		1
GUT_GENOME015388	BritoIL_2016__WL.17.ST__bin.31	CIBIO	MAG	2777174	18	199812	43.75	96.98	0.84		0	0	0	16		GUT_GENOME001379	MGYG-HGUT-00231	Coprococcus eutactus_A	SRS475709	SRP029441	Fiji	Oceania	ftp://ftp.ebi.ac.uk/pub/databases/metagenomics/mgnify_genomes/human-gut/v1.0/all_genomes/MGYG-HGUT-002/MGYG-HGUT-00231/genomes1/GUT_GENOME015388.gff.gz		2
GUT_GENOME015627	BritoIL_2016__WL.35.ST__bin.31	CIBIO	MAG	2591934	42	96702	41.31	98.32	0		0	0	0	14		GUT_GENOME001027	MGYG-HGUT-00189	Coprococcus sp000154245	SRS475722	SRP029441	Fiji	Oceania	ftp://ftp.ebi.ac.uk/pub/databases/metagenomics/mgnify_genomes/human-gut/v1.0/all_genomes/MGYG-HGUT-001/MGYG-HGUT-00189/genomes2/GUT_GENOME015627.gff.gz		5
GUT_GENOME015824	BritoIL_2016__WL.5.ST__bin.58	CIBIO	MAG	2749134	34	117279	44.18	99.04	0		0	0	0	14		GUT_GENOME001379	MGYG-HGUT-00231	Coprococcus eutactus_A	SRS475953	SRP029441	Fiji	Oceania	ftp://ftp.ebi.ac.uk/pub/databases/metagenomics/mgnify_genomes/human-gut/v1.0/all_genomes/MGYG-HGUT-002/MGYG-HGUT-00231/genomes1/GUT_GENOME015824.gff.gz		2
GUT_GENOME015837	BritoIL_2016__WL.7.ST__bin.26	CIBIO	MAG	2349471	19	257360	41.89	97.99	0		0	20.68	0	16		GUT_GENOME140272	MGYG-HGUT-02289	Coprococcus sp000433075	SRS476211	SRP029441	Fiji	Oceania	ftp://ftp.ebi.ac.uk/pub/databases/metagenomics/mgnify_genomes/human-gut/v1.0/all_genomes/MGYG-HGUT-022/MGYG-HGUT-02289/genomes1/GUT_GENOME015837.gff.gz		8
GUT_GENOME016255	ChengpingW_2017__AS128raw__bin.27	CIBIO	MAG	2848247	35	119637	44.06	99.33	0		0	0	0	15		GUT_GENOME001379	MGYG-HGUT-00231	Coprococcus eutactus_A	SRS1997075	SRP100575	China	Asia	ftp://ftp.ebi.ac.uk/pub/databases/metagenomics/mgnify_genomes/human-gut/v1.0/all_genomes/MGYG-HGUT-002/MGYG-HGUT-00231/genomes3/GUT_GENOME016255.gff.gz		2
GUT_GENOME016347	ChengpingW_2017__AS133raw__bin.12	CIBIO	MAG	2821593	39	108239	44.16	99.33	0		0	0	0	17		GUT_GENOME001379	MGYG-HGUT-00231	Coprococcus eutactus_A	SRS1997072	SRP100575	China	Asia	ftp://ftp.ebi.ac.uk/pub/databases/metagenomics/mgnify_genomes/human-gut/v1.0/all_genomes/MGYG-HGUT-002/MGYG-HGUT-00231/genomes1/GUT_GENOME016347.gff.gz		2
GUT_GENOME016619	ChengpingW_2017__AS26raw__bin.45	CIBIO	MAG	2269746	271	12333	41.9	95.97	0.73		0	0	0	11		GUT_GENOME001027	MGYG-HGUT-00189	Coprococcus sp900066115	SRS1997058	SRP100575	China	Asia	ftp://ftp.ebi.ac.uk/pub/databases/metagenomics/mgnify_genomes/human-gut/v1.0/all_genomes/MGYG-HGUT-001/MGYG-HGUT-00189/genomes2/GUT_GENOME016619.gff.gz		4
GUT_GENOME016657	ChengpingW_2017__AS29raw__bin.3	CIBIO	MAG	2447412	116	33421	41.47	95.97	0.67		0	0	0	13		GUT_GENOME001027	MGYG-HGUT-00189	Coprococcus sp000154245	SRS1997057	SRP100575	China	Asia	ftp://ftp.ebi.ac.uk/pub/databases/metagenomics/mgnify_genomes/human-gut/v1.0/all_genomes/MGYG-HGUT-001/MGYG-HGUT-00189/genomes2/GUT_GENOME016657.gff.gz		5
GUT_GENOME017328	ChengpingW_2017__AS78raw__bin.27	CIBIO	MAG	2683284	37	94886	44.37	96.64	0		0	0	0	17		GUT_GENOME001379	MGYG-HGUT-00231	Coprococcus eutactus_A	SRS1997006	SRP100575	China	Asia	ftp://ftp.ebi.ac.uk/pub/databases/metagenomics/mgnify_genomes/human-gut/v1.0/all_genomes/MGYG-HGUT-002/MGYG-HGUT-00231/genomes1/GUT_GENOME017328.gff.gz		2
GUT_GENOME017590	ChengpingW_2017__AS9raw__bin.11	CIBIO	MAG	2553649	116	36099	41.57	97.99	0.67		0	37.51	0	13		GUT_GENOME001027	MGYG-HGUT-00189	Coprococcus sp900066115	SRS1997019	SRP100575	China	Asia	ftp://ftp.ebi.ac.uk/pub/databases/metagenomics/mgnify_genomes/human-gut/v1.0/all_genomes/MGYG-HGUT-001/MGYG-HGUT-00189/genomes1/GUT_GENOME017590.gff.gz		4
GUT_GENOME017709	CM_madagascar__A07_01_1FE__bin.46	CIBIO	MAG	2248431	181	18300	42.3	95.64	0.67		0	22.9	0	11		GUT_GENOME140272	MGYG-HGUT-02289	Coprococcus sp000433075	SRS3638671	SRP156699	Madagascar	Africa	ftp://ftp.ebi.ac.uk/pub/databases/metagenomics/mgnify_genomes/human-gut/v1.0/all_genomes/MGYG-HGUT-022/MGYG-HGUT-02289/genomes1/GUT_GENOME017709.gff.gz		8
GUT_GENOME017948	CM_madagascar__A27_02_1FE__bin.21	CIBIO	MAG	2871704	94	55996	44.08	97.99	0		0	0	0	13		GUT_GENOME001379	MGYG-HGUT-00231	Coprococcus eutactus_A	SRS3638636	SRP156699	Madagascar	Africa	ftp://ftp.ebi.ac.uk/pub/databases/metagenomics/mgnify_genomes/human-gut/v1.0/all_genomes/MGYG-HGUT-002/MGYG-HGUT-00231/genomes2/GUT_GENOME017948.gff.gz		2
GUT_GENOME018340	CM_madagascar__A56_01_1FE__bin.27	CIBIO	MAG	2448464	71	67875	41.86	96.54	0.06		0	0	0	14		GUT_GENOME140272	MGYG-HGUT-02289	Coprococcus sp000433075	SRS3638581	SRP156699	Madagascar	Africa	ftp://ftp.ebi.ac.uk/pub/databases/metagenomics/mgnify_genomes/human-gut/v1.0/all_genomes/MGYG-HGUT-022/MGYG-HGUT-02289/genomes1/GUT_GENOME018340.gff.gz		8
GUT_GENOME018447	CM_madagascar__A68_01_1FE__bin.7	CIBIO	MAG	2628430	119	35756	41.4	97.32	0.67		0	52.51	12.96	13		GUT_GENOME001027	MGYG-HGUT-00189	Coprococcus sp000154245	SRS3638664	SRP156699	Madagascar	Africa	ftp://ftp.ebi.ac.uk/pub/databases/metagenomics/mgnify_genomes/human-gut/v1.0/all_genomes/MGYG-HGUT-001/MGYG-HGUT-00189/genomes1/GUT_GENOME018447.gff.gz		5
GUT_GENOME018544	CM_madagascar__A73_02_1FE__bin.25	CIBIO	MAG	2673649	62	79279	41.6	98.55	0.34		0	0	0	16		GUT_GENOME001027	MGYG-HGUT-00189	Coprococcus sp900066115	SRS3638617	SRP156699	Madagascar	Africa	ftp://ftp.ebi.ac.uk/pub/databases/metagenomics/mgnify_genomes/human-gut/v1.0/all_genomes/MGYG-HGUT-001/MGYG-HGUT-00189/genomes2/GUT_GENOME018544.gff.gz		4
GUT_GENOME018571	CM_madagascar__A75_02_1FE__bin.44	CIBIO	MAG	2642451	51	89687	41.02	97.65	0.34		0	0	0	15		GUT_GENOME001027	MGYG-HGUT-00189	Coprococcus sp000154245	SRS3638591	SRP156699	Madagascar	Africa	ftp://ftp.ebi.ac.uk/pub/databases/metagenomics/mgnify_genomes/human-gut/v1.0/all_genomes/MGYG-HGUT-001/MGYG-HGUT-00189/genomes2/GUT_GENOME018571.gff.gz		5
GUT_GENOME018647	CM_madagascar__A81_03_1FE__bin.18	CIBIO	MAG	2259531	166	19779	42.2	97.15	0.67		0	0	0	11		GUT_GENOME140272	MGYG-HGUT-02289	Coprococcus sp000433075	SRS3638635	SRP156699	Madagascar	Africa	ftp://ftp.ebi.ac.uk/pub/databases/metagenomics/mgnify_genomes/human-gut/v1.0/all_genomes/MGYG-HGUT-022/MGYG-HGUT-02289/genomes1/GUT_GENOME018647.gff.gz		8
GUT_GENOME018775	CM_madagascar__A89_01_1FE__bin.74	CIBIO	MAG	2834955	134	34939	43.24	96.6	0		0	21.27	11.21	15		GUT_GENOME000055	MGYG-HGUT-00018	Coprococcus eutactus	SRS3638597	SRP156699	Madagascar	Africa	ftp://ftp.ebi.ac.uk/pub/databases/metagenomics/mgnify_genomes/human-gut/v1.0/all_genomes/MGYG-HGUT-000/MGYG-HGUT-00018/genomes1/GUT_GENOME018775.gff.gz		1
GUT_GENOME018998	CM_madagascar__A94_03_1FE__bin.39	CIBIO	MAG	2491497	67	53116	41.93	99.33	0		0	0	0	16		GUT_GENOME140272	MGYG-HGUT-02289	Coprococcus sp000433075	SRS3638598	SRP156699	Madagascar	Africa	ftp://ftp.ebi.ac.uk/pub/databases/metagenomics/mgnify_genomes/human-gut/v1.0/all_genomes/MGYG-HGUT-022/MGYG-HGUT-02289/genomes1/GUT_GENOME018998.gff.gz		8
GUT_GENOME019019	CM_madagascar__A95_01_1FE__bin.24	CIBIO	MAG	2444814	62	57021	41.86	98.66	0		0	25.11	0	12		GUT_GENOME140272	MGYG-HGUT-02289	Coprococcus sp000433075	SRS3638607	SRP156699	Madagascar	Africa	ftp://ftp.ebi.ac.uk/pub/databases/metagenomics/mgnify_genomes/human-gut/v1.0/all_genomes/MGYG-HGUT-022/MGYG-HGUT-02289/genomes1/GUT_GENOME019019.gff.gz		8
GUT_GENOME019059	CM_madagascar__V06_02_1FE__bin.11	CIBIO	MAG	2384307	292	10782	41.96	95.95	0.22		0	0	0	12		GUT_GENOME001027	MGYG-HGUT-00189	Coprococcus sp900066115	SRS3638573	SRP156699	Madagascar	Africa	ftp://ftp.ebi.ac.uk/pub/databases/metagenomics/mgnify_genomes/human-gut/v1.0/all_genomes/MGYG-HGUT-001/MGYG-HGUT-00189/genomes1/GUT_GENOME019059.gff.gz		4
GUT_GENOME019352	CM_madagascar__V54_01_1FE__bin.4	CIBIO	MAG	2782358	42	99362	44.12	97.18	0		0	0	0	14		GUT_GENOME001379	MGYG-HGUT-00231	Coprococcus eutactus_A	SRS3638602	SRP156699	Madagascar	Africa	ftp://ftp.ebi.ac.uk/pub/databases/metagenomics/mgnify_genomes/human-gut/v1.0/all_genomes/MGYG-HGUT-002/MGYG-HGUT-00231/genomes2/GUT_GENOME019352.gff.gz		2
GUT_GENOME019361	CosteaPI_2017__alien-11-600-0__bin.24	CIBIO	MAG	2978319	21	350121	44.07	99.33	0		0	70.65	0	17		GUT_GENOME001379	MGYG-HGUT-00231	Coprococcus eutactus_A	ERS1444631	ERP019502	Germany	Europe	ftp://ftp.ebi.ac.uk/pub/databases/metagenomics/mgnify_genomes/human-gut/v1.0/all_genomes/MGYG-HGUT-002/MGYG-HGUT-00231/genomes2/GUT_GENOME019361.gff.gz		2
GUT_GENOME019439	CosteaPI_2017__alien-11-637-0__bin.70	CIBIO	MAG	2994976	31	143475	44.01	99.33	0		0	0	0	18		GUT_GENOME001379	MGYG-HGUT-00231	Coprococcus eutactus_A	ERS1444633	ERP019502	Germany	Europe	ftp://ftp.ebi.ac.uk/pub/databases/metagenomics/mgnify_genomes/human-gut/v1.0/all_genomes/MGYG-HGUT-002/MGYG-HGUT-00231/genomes2/GUT_GENOME019439.gff.gz		2
GUT_GENOME019676	CosteaPI_2017__alien4-11-0-0__bin.46	CIBIO	MAG	2666336	102	38769	44.44	97.5	0.22		0	0	0	16		GUT_GENOME001379	MGYG-HGUT-00231	Coprococcus eutactus_A	ERS1444645	ERP019502	Germany	Europe	ftp://ftp.ebi.ac.uk/pub/databases/metagenomics/mgnify_genomes/human-gut/v1.0/all_genomes/MGYG-HGUT-002/MGYG-HGUT-00231/genomes2/GUT_GENOME019676.gff.gz		2
GUT_GENOME020202	CosteaPI_2017__donald2-11-0-0__bin.31	CIBIO	MAG	2580294	25	150521	44.09	97.32	0		0	0	11.21	18		GUT_GENOME001379	MGYG-HGUT-00231	Coprococcus eutactus_A	ERS1444669	ERP019502	Germany	Europe	ftp://ftp.ebi.ac.uk/pub/databases/metagenomics/mgnify_genomes/human-gut/v1.0/all_genomes/MGYG-HGUT-002/MGYG-HGUT-00231/genomes3/GUT_GENOME020202.gff.gz		2
GUT_GENOME020289	CosteaPI_2017__donald3-11-0-0__bin.3	CIBIO	MAG	2805802	29	168314	44.01	98.66	0		0	16.24	0	16		GUT_GENOME001379	MGYG-HGUT-00231	Coprococcus eutactus_A	ERS1444672	ERP019502	Germany	Europe	ftp://ftp.ebi.ac.uk/pub/databases/metagenomics/mgnify_genomes/human-gut/v1.0/all_genomes/MGYG-HGUT-002/MGYG-HGUT-00231/genomes2/GUT_GENOME020289.gff.gz		2
GUT_GENOME020320	CosteaPI_2017__donald3-11-30-0__bin.49	CIBIO	MAG	2790752	48	86661	44.28	99.33	0.13		0	0	0	16		GUT_GENOME001379	MGYG-HGUT-00231	Coprococcus eutactus_A	ERS1444673	ERP019502	Germany	Europe	ftp://ftp.ebi.ac.uk/pub/databases/metagenomics/mgnify_genomes/human-gut/v1.0/all_genomes/MGYG-HGUT-002/MGYG-HGUT-00231/genomes4/GUT_GENOME020320.gff.gz		2
GUT_GENOME020330	CosteaPI_2017__donald3-11-7-0__bin.26	CIBIO	MAG	2783813	25	204164	44.06	98.66	0		0	77.89	0	17		GUT_GENOME001379	MGYG-HGUT-00231	Coprococcus eutactus_A	ERS1444674	ERP019502	Germany	Europe	ftp://ftp.ebi.ac.uk/pub/databases/metagenomics/mgnify_genomes/human-gut/v1.0/all_genomes/MGYG-HGUT-002/MGYG-HGUT-00231/genomes3/GUT_GENOME020330.gff.gz		2
GUT_GENOME020487	CosteaPI_2017__donald5-11-7-0__bin.50	CIBIO	MAG	2892206	24	166970	44.15	99.33	0.13		0	0	0	17		GUT_GENOME001379	MGYG-HGUT-00231	Coprococcus eutactus_A	ERS1444680	ERP019502	Germany	Europe	ftp://ftp.ebi.ac.uk/pub/databases/metagenomics/mgnify_genomes/human-gut/v1.0/all_genomes/MGYG-HGUT-002/MGYG-HGUT-00231/genomes2/GUT_GENOME020487.gff.gz		2
GUT_GENOME020549	CosteaPI_2017__halbarad-11-392-0__bin.26	CIBIO	MAG	2825427	24	253901	44.17	99.33	0		0	0	0	17		GUT_GENOME001379	MGYG-HGUT-00231	Coprococcus eutactus_A	ERS1444683	ERP019502	Germany	Europe	ftp://ftp.ebi.ac.uk/pub/databases/metagenomics/mgnify_genomes/human-gut/v1.0/all_genomes/MGYG-HGUT-002/MGYG-HGUT-00231/genomes2/GUT_GENOME020549.gff.gz		2
GUT_GENOME021291	CosteaPI_2017__peacemaker4-11-0-0__bin.4	CIBIO	MAG	2691126	194	19915	43.4	96.62	0		0	0	0	14		GUT_GENOME000055	MGYG-HGUT-00018	Coprococcus eutactus	ERS1444714	ERP019502	Germany	Europe	ftp://ftp.ebi.ac.uk/pub/databases/metagenomics/mgnify_genomes/human-gut/v1.0/all_genomes/MGYG-HGUT-000/MGYG-HGUT-00018/genomes1/GUT_GENOME021291.gff.gz		1
GUT_GENOME021431	CosteaPI_2017__pluto2-11-30-0__bin.45	CIBIO	MAG	2866614	47	82162	44.07	98.66	0		0	0	0	14		GUT_GENOME001379	MGYG-HGUT-00231	Coprococcus eutactus_A	ERS1444719	ERP019502	Germany	Europe	ftp://ftp.ebi.ac.uk/pub/databases/metagenomics/mgnify_genomes/human-gut/v1.0/all_genomes/MGYG-HGUT-002/MGYG-HGUT-00231/genomes3/GUT_GENOME021431.gff.gz		2
GUT_GENOME021715	CosteaPI_2017__scavenger-11-889-0__bin.49	CIBIO	MAG	2741591	94	51433	44.57	99.33	0		0	0	0	18		GUT_GENOME001379	MGYG-HGUT-00231	Coprococcus eutactus_A	ERS1444732	ERP019502	Germany	Europe	ftp://ftp.ebi.ac.uk/pub/databases/metagenomics/mgnify_genomes/human-gut/v1.0/all_genomes/MGYG-HGUT-002/MGYG-HGUT-00231/genomes1/GUT_GENOME021715.gff.gz		2
GUT_GENOME022026	CosteaPI_2017__SID713A009-11-90-0__bin.87	CIBIO	MAG	2982278	33	141648	43.11	96.98	0		0	0	0	16		GUT_GENOME000055	MGYG-HGUT-00018	Coprococcus eutactus	ERS1444466	ERP019502	Kazakhstan	Asia	ftp://ftp.ebi.ac.uk/pub/databases/metagenomics/mgnify_genomes/human-gut/v1.0/all_genomes/MGYG-HGUT-000/MGYG-HGUT-00018/genomes1/GUT_GENOME022026.gff.gz		1
GUT_GENOME022075	CosteaPI_2017__SID713A010-11-90-0__bin.22	CIBIO	MAG	2697828	22	270865	41.23	97.99	0.06		0	0	0	15		GUT_GENOME001027	MGYG-HGUT-00189	Coprococcus sp900066115	ERS1444468	ERP019502	Kazakhstan	Asia	ftp://ftp.ebi.ac.uk/pub/databases/metagenomics/mgnify_genomes/human-gut/v1.0/all_genomes/MGYG-HGUT-001/MGYG-HGUT-00189/genomes1/GUT_GENOME022075.gff.gz		4
GUT_GENOME022334	CosteaPI_2017__SID713A021-11-90-0__bin.69	CIBIO	MAG	2642142	47	86264	41.31	99.33	0		0	0	14.53	16		GUT_GENOME001027	MGYG-HGUT-00189	Coprococcus sp900066115	ERS1444478	ERP019502	Kazakhstan	Asia	ftp://ftp.ebi.ac.uk/pub/databases/metagenomics/mgnify_genomes/human-gut/v1.0/all_genomes/MGYG-HGUT-001/MGYG-HGUT-00189/genomes2/GUT_GENOME022334.gff.gz		4
GUT_GENOME022396	CosteaPI_2017__SID713A023-11-90-0__bin.55	CIBIO	MAG	2766979	34	123075	41.33	98.66	0		0	0	16.72	17		GUT_GENOME001027	MGYG-HGUT-00189	Coprococcus sp900066115	ERS1444480	ERP019502	Kazakhstan	Asia	ftp://ftp.ebi.ac.uk/pub/databases/metagenomics/mgnify_genomes/human-gut/v1.0/all_genomes/MGYG-HGUT-001/MGYG-HGUT-00189/genomes2/GUT_GENOME022396.gff.gz		4
GUT_GENOME022435	CosteaPI_2017__SID713A026-11-0-0__bin.41	CIBIO	MAG	2617821	121	32161	44.72	97.13	0		0	0	0	12		GUT_GENOME001379	MGYG-HGUT-00231	Coprococcus eutactus_A	ERS1444481	ERP019502	Kazakhstan	Asia	ftp://ftp.ebi.ac.uk/pub/databases/metagenomics/mgnify_genomes/human-gut/v1.0/all_genomes/MGYG-HGUT-002/MGYG-HGUT-00231/genomes3/GUT_GENOME022435.gff.gz		2
GUT_GENOME022465	CosteaPI_2017__SID713A026-11-90-0__bin.14	CIBIO	MAG	2795424	46	92483	44.32	97.99	0		0	11.55	0	16		GUT_GENOME001379	MGYG-HGUT-00231	Coprococcus eutactus_A	ERS1444482	ERP019502	Kazakhstan	Asia	ftp://ftp.ebi.ac.uk/pub/databases/metagenomics/mgnify_genomes/human-gut/v1.0/all_genomes/MGYG-HGUT-002/MGYG-HGUT-00231/genomes1/GUT_GENOME022465.gff.gz		2
GUT_GENOME022620	CosteaPI_2017__SID713A029-11-90-0__bin.4	CIBIO	MAG	2985705	27	195511	43.98	99.33	0		0	0	10.74	16		GUT_GENOME001379	MGYG-HGUT-00231	Coprococcus eutactus_A	ERS1444486	ERP019502	Kazakhstan	Asia	ftp://ftp.ebi.ac.uk/pub/databases/metagenomics/mgnify_genomes/human-gut/v1.0/all_genomes/MGYG-HGUT-002/MGYG-HGUT-00231/genomes1/GUT_GENOME022620.gff.gz		2
GUT_GENOME022647	CosteaPI_2017__SID713A030-11-0-0__bin.52	CIBIO	MAG	2921868	24	213763	44.05	99.33	0		0	0	0	14		GUT_GENOME001379	MGYG-HGUT-00231	Coprococcus eutactus_A	ERS1444487	ERP019502	Kazakhstan	Asia	ftp://ftp.ebi.ac.uk/pub/databases/metagenomics/mgnify_genomes/human-gut/v1.0/all_genomes/MGYG-HGUT-002/MGYG-HGUT-00231/genomes3/GUT_GENOME022647.gff.gz		2
GUT_GENOME022833	CosteaPI_2017__SID713A039-11-90-0__bin.2	CIBIO	MAG	2394348	27	174068	41.97	97.32	0		0	0	0	16		GUT_GENOME140272	MGYG-HGUT-02289	Coprococcus sp000433075	ERS1444496	ERP019502	Kazakhstan	Asia	ftp://ftp.ebi.ac.uk/pub/databases/metagenomics/mgnify_genomes/human-gut/v1.0/all_genomes/MGYG-HGUT-022/MGYG-HGUT-02289/genomes1/GUT_GENOME022833.gff.gz		8
GUT_GENOME022882	CosteaPI_2017__SID713A040-11-0-0__bin.51	CIBIO	MAG	2597242	68	76031	41.02	98.99	0.34		0	0	0	15		GUT_GENOME001027	MGYG-HGUT-00189	Coprococcus sp000154245	ERS1444497	ERP019502	Kazakhstan	Asia	ftp://ftp.ebi.ac.uk/pub/databases/metagenomics/mgnify_genomes/human-gut/v1.0/all_genomes/MGYG-HGUT-001/MGYG-HGUT-00189/genomes1/GUT_GENOME022882.gff.gz		5
GUT_GENOME022984	CosteaPI_2017__SID713A045-11-90-0__bin.67	CIBIO	MAG	2520415	64	59907	41.22	99.33	0.69		0	0	0	13		GUT_GENOME001027	MGYG-HGUT-00189	Coprococcus sp000154245	ERS1444500	ERP019502	Kazakhstan	Asia	ftp://ftp.ebi.ac.uk/pub/databases/metagenomics/mgnify_genomes/human-gut/v1.0/all_genomes/MGYG-HGUT-001/MGYG-HGUT-00189/genomes1/GUT_GENOME022984.gff.gz		5
GUT_GENOME023100	CosteaPI_2017__SID713A051-11-0-0__bin.37	CIBIO	MAG	2776845	27	198675	44.36	97.32	0		0	0	0	15		GUT_GENOME001379	MGYG-HGUT-00231	Coprococcus eutactus_A	ERS1444505	ERP019502	Kazakhstan	Asia	ftp://ftp.ebi.ac.uk/pub/databases/metagenomics/mgnify_genomes/human-gut/v1.0/all_genomes/MGYG-HGUT-002/MGYG-HGUT-00231/genomes2/GUT_GENOME023100.gff.gz		2
GUT_GENOME023119	CosteaPI_2017__SID713A051-11-0-0__bin.60	CIBIO	MAG	2616285	35	112533	41.23	99.33	0		0	18.66	0	15		GUT_GENOME001027	MGYG-HGUT-00189	Coprococcus sp900066115	ERS1444505	ERP019502	Kazakhstan	Asia	ftp://ftp.ebi.ac.uk/pub/databases/metagenomics/mgnify_genomes/human-gut/v1.0/all_genomes/MGYG-HGUT-001/MGYG-HGUT-00189/genomes2/GUT_GENOME023119.gff.gz		4
GUT_GENOME023235	CosteaPI_2017__SID713A052-11-90-0__bin.3	CIBIO	MAG	2692348	25	189229	41.47	99.33	0		0	0	0	15		GUT_GENOME001027	MGYG-HGUT-00189	Coprococcus sp900066115	ERS1444508	ERP019502	Kazakhstan	Asia	ftp://ftp.ebi.ac.uk/pub/databases/metagenomics/mgnify_genomes/human-gut/v1.0/all_genomes/MGYG-HGUT-001/MGYG-HGUT-00189/genomes1/GUT_GENOME023235.gff.gz		4
GUT_GENOME023277	CosteaPI_2017__SID713A053-11-0-0__bin.39	CIBIO	MAG	2932391	30	164173	42.6	98.66	0.31		0	0	0	18		GUT_GENOME000055	MGYG-HGUT-00018	Coprococcus eutactus	ERS1444509	ERP019502	Kazakhstan	Asia	ftp://ftp.ebi.ac.uk/pub/databases/metagenomics/mgnify_genomes/human-gut/v1.0/all_genomes/MGYG-HGUT-000/MGYG-HGUT-00018/genomes1/GUT_GENOME023277.gff.gz		1
GUT_GENOME023579	CosteaPI_2017__SID713A058-11-90-0__bin.34	CIBIO	MAG	2412692	43	72234	41.45	98.66	0		0	0	0	17		GUT_GENOME001027	MGYG-HGUT-00189	Coprococcus sp000154245	ERS1444518	ERP019502	Kazakhstan	Asia	ftp://ftp.ebi.ac.uk/pub/databases/metagenomics/mgnify_genomes/human-gut/v1.0/all_genomes/MGYG-HGUT-001/MGYG-HGUT-00189/genomes2/GUT_GENOME023579.gff.gz		5
GUT_GENOME023631	CosteaPI_2017__SID713A062-11-0-0__bin.50	CIBIO	MAG	2653870	28	213580	41.24	99.33	0		0	0	5.44	19		GUT_GENOME001027	MGYG-HGUT-00189	Coprococcus sp900066115	ERS1444519	ERP019502	Kazakhstan	Asia	ftp://ftp.ebi.ac.uk/pub/databases/metagenomics/mgnify_genomes/human-gut/v1.0/all_genomes/MGYG-HGUT-001/MGYG-HGUT-00189/genomes2/GUT_GENOME023631.gff.gz		4
GUT_GENOME023806	CosteaPI_2017__SID713A066-11-0-0__bin.8	CIBIO	MAG	2742781	81	50265	44.49	95.69	0.67		0	0	0	15		GUT_GENOME001379	MGYG-HGUT-00231	Coprococcus eutactus_A	ERS1444523	ERP019502	Kazakhstan	Asia	ftp://ftp.ebi.ac.uk/pub/databases/metagenomics/mgnify_genomes/human-gut/v1.0/all_genomes/MGYG-HGUT-002/MGYG-HGUT-00231/genomes3/GUT_GENOME023806.gff.gz		2
GUT_GENOME024044	CosteaPI_2017__SID713A077-11-0-0__bin.23	CIBIO	MAG	2816031	35	119090	44.23	99.33	0		0	16.24	0	17		GUT_GENOME001379	MGYG-HGUT-00231	Coprococcus eutactus_A	ERS1444533	ERP019502	Kazakhstan	Asia	ftp://ftp.ebi.ac.uk/pub/databases/metagenomics/mgnify_genomes/human-gut/v1.0/all_genomes/MGYG-HGUT-002/MGYG-HGUT-00231/genomes1/GUT_GENOME024044.gff.gz		2
GUT_GENOME024344	CosteaPI_2017__SID713A088-11-0-0__bin.32	CIBIO	MAG	2759128	65	59314	44.24	99.33	0		0	0	0	15		GUT_GENOME001379	MGYG-HGUT-00231	Coprococcus eutactus_A	ERS1444543	ERP019502	Kazakhstan	Asia	ftp://ftp.ebi.ac.uk/pub/databases/metagenomics/mgnify_genomes/human-gut/v1.0/all_genomes/MGYG-HGUT-002/MGYG-HGUT-00231/genomes3/GUT_GENOME024344.gff.gz		2
GUT_GENOME024396	CosteaPI_2017__SID713A089-11-0-0__bin.22	CIBIO	MAG	2642343	26	167335	41.44	99.33	0		0	20.74	0	14		GUT_GENOME001027	MGYG-HGUT-00189	Coprococcus sp900066115	ERS1444545	ERP019502	Kazakhstan	Asia	ftp://ftp.ebi.ac.uk/pub/databases/metagenomics/mgnify_genomes/human-gut/v1.0/all_genomes/MGYG-HGUT-001/MGYG-HGUT-00189/genomes1/GUT_GENOME024396.gff.gz		4
GUT_GENOME024398	CosteaPI_2017__SID713A089-11-0-0__bin.25	CIBIO	MAG	2814034	30	129995	43.87	96.58	0		0	0	14.53	17		GUT_GENOME001379	MGYG-HGUT-00231	Coprococcus eutactus_A	ERS1444545	ERP019502	Kazakhstan	Asia	ftp://ftp.ebi.ac.uk/pub/databases/metagenomics/mgnify_genomes/human-gut/v1.0/all_genomes/MGYG-HGUT-002/MGYG-HGUT-00231/genomes1/GUT_GENOME024398.gff.gz		2
GUT_GENOME024429	CosteaPI_2017__SID713A089-11-90-0__bin.20	CIBIO	MAG	2631182	19	244667	41.25	99.33	0		0	0	34.91	17		GUT_GENOME001027	MGYG-HGUT-00189	Coprococcus sp900066115	ERS1444546	ERP019502	Kazakhstan	Asia	ftp://ftp.ebi.ac.uk/pub/databases/metagenomics/mgnify_genomes/human-gut/v1.0/all_genomes/MGYG-HGUT-001/MGYG-HGUT-00189/genomes1/GUT_GENOME024429.gff.gz		4
GUT_GENOME024713	CosteaPI_2017__SID713B007-11-0-0__bin.12	CIBIO	MAG	2880333	39	112254	42.82	97.32	0		0	0	0	16		GUT_GENOME105828	MGYG-HGUT-01745	Coprococcus sp.	ERS1444555	ERP019502	Kazakhstan	Asia	ftp://ftp.ebi.ac.uk/pub/databases/metagenomics/mgnify_genomes/human-gut/v1.0/all_genomes/MGYG-HGUT-017/MGYG-HGUT-01745/genomes1/GUT_GENOME024713.gff.gz		7
GUT_GENOME024754	CosteaPI_2017__SID713B007-11-90-0__bin.32	CIBIO	MAG	2662257	34	211571	41.39	98.66	0		0	0	11.32	17		GUT_GENOME001027	MGYG-HGUT-00189	Coprococcus sp900066115	ERS1444556	ERP019502	Kazakhstan	Asia	ftp://ftp.ebi.ac.uk/pub/databases/metagenomics/mgnify_genomes/human-gut/v1.0/all_genomes/MGYG-HGUT-001/MGYG-HGUT-00189/genomes1/GUT_GENOME024754.gff.gz		4
GUT_GENOME024771	CosteaPI_2017__SID713B012-11-0-0__bin.20	CIBIO	MAG	2884725	30	140351	43.05	95.97	0		0	0	23.18	17		GUT_GENOME000055	MGYG-HGUT-00018	Coprococcus eutactus	ERS1444557	ERP019502	Kazakhstan	Asia	ftp://ftp.ebi.ac.uk/pub/databases/metagenomics/mgnify_genomes/human-gut/v1.0/all_genomes/MGYG-HGUT-000/MGYG-HGUT-00018/genomes1/GUT_GENOME024771.gff.gz		1
GUT_GENOME024892	CosteaPI_2017__SID713B014-11-90-0__bin.7	CIBIO	MAG	2752161	41	100513	43.38	95.97	0		0	0	0	16		GUT_GENOME000055	MGYG-HGUT-00018	Coprococcus eutactus	ERS1444560	ERP019502	Kazakhstan	Asia	ftp://ftp.ebi.ac.uk/pub/databases/metagenomics/mgnify_genomes/human-gut/v1.0/all_genomes/MGYG-HGUT-000/MGYG-HGUT-00018/genomes1/GUT_GENOME024892.gff.gz		1
GUT_GENOME025049	CosteaPI_2017__SID713B020-11-90-0__bin.4	CIBIO	MAG	2584125	171	21751	44.89	96.64	0.34		0	17.81	14.53	17		GUT_GENOME001379	MGYG-HGUT-00231	Coprococcus eutactus_A	ERS1444566	ERP019502	Kazakhstan	Asia	ftp://ftp.ebi.ac.uk/pub/databases/metagenomics/mgnify_genomes/human-gut/v1.0/all_genomes/MGYG-HGUT-002/MGYG-HGUT-00231/genomes1/GUT_GENOME025049.gff.gz		2
GUT_GENOME025140	CosteaPI_2017__SID713B026-11-90-0__bin.29	CIBIO	MAG	2870056	26	185568	44.01	96.28	0		0	0	0	17		GUT_GENOME001379	MGYG-HGUT-00231	Coprococcus eutactus_A	ERS1444570	ERP019502	Kazakhstan	Asia	ftp://ftp.ebi.ac.uk/pub/databases/metagenomics/mgnify_genomes/human-gut/v1.0/all_genomes/MGYG-HGUT-002/MGYG-HGUT-00231/genomes2/GUT_GENOME025140.gff.gz		2
GUT_GENOME025391	CosteaPI_2017__SID713B033-11-0-0__bin.98	CIBIO	MAG	2871267	24	198260	44.01	99.33	0.67		0	0	0	16		GUT_GENOME001379	MGYG-HGUT-00231	Coprococcus eutactus_A	ERS1444577	ERP019502	Kazakhstan	Asia	ftp://ftp.ebi.ac.uk/pub/databases/metagenomics/mgnify_genomes/human-gut/v1.0/all_genomes/MGYG-HGUT-002/MGYG-HGUT-00231/genomes3/GUT_GENOME025391.gff.gz		2
GUT_GENOME025471	CosteaPI_2017__SID713B035-11-90-0__bin.54	CIBIO	MAG	2887473	23	219382	44.08	99.33	0		0	25.11	0	17		GUT_GENOME001379	MGYG-HGUT-00231	Coprococcus eutactus_A	ERS1444580	ERP019502	Kazakhstan	Asia	ftp://ftp.ebi.ac.uk/pub/databases/metagenomics/mgnify_genomes/human-gut/v1.0/all_genomes/MGYG-HGUT-002/MGYG-HGUT-00231/genomes3/GUT_GENOME025471.gff.gz		2
GUT_GENOME025539	CosteaPI_2017__SID713B040-11-0-0__bin.25	CIBIO	MAG	2302983	85	41340	42.11	95.97	0.22		0	0	0	16		GUT_GENOME140272	MGYG-HGUT-02289	Coprococcus sp000433075	ERS1444583	ERP019502	Kazakhstan	Asia	ftp://ftp.ebi.ac.uk/pub/databases/metagenomics/mgnify_genomes/human-gut/v1.0/all_genomes/MGYG-HGUT-022/MGYG-HGUT-02289/genomes1/GUT_GENOME025539.gff.gz		8
GUT_GENOME025615	CosteaPI_2017__SID713B040-11-90-0__bin.61	CIBIO	MAG	2501786	26	207882	41.88	99.33	0		0	0	0	16		GUT_GENOME140272	MGYG-HGUT-02289	Coprococcus sp000433075	ERS1444584	ERP019502	Kazakhstan	Asia	ftp://ftp.ebi.ac.uk/pub/databases/metagenomics/mgnify_genomes/human-gut/v1.0/all_genomes/MGYG-HGUT-022/MGYG-HGUT-02289/genomes1/GUT_GENOME025615.gff.gz		8
GUT_GENOME025670	CosteaPI_2017__SID713B041-11-0-0__bin.76	CIBIO	MAG	2310781	52	91464	42.01	97.99	0		0	0	0	14		GUT_GENOME140272	MGYG-HGUT-02289	Coprococcus sp000433075	ERS1444585	ERP019502	Kazakhstan	Asia	ftp://ftp.ebi.ac.uk/pub/databases/metagenomics/mgnify_genomes/human-gut/v1.0/all_genomes/MGYG-HGUT-022/MGYG-HGUT-02289/genomes1/GUT_GENOME025670.gff.gz		8
GUT_GENOME025698	CosteaPI_2017__SID713B042-11-0-0__bin.41	CIBIO	MAG	2985022	34	123789	42.73	97.32	0		0	17.68	14.53	18		GUT_GENOME000055	MGYG-HGUT-00018	Coprococcus eutactus	ERS1444587	ERP019502	Kazakhstan	Asia	ftp://ftp.ebi.ac.uk/pub/databases/metagenomics/mgnify_genomes/human-gut/v1.0/all_genomes/MGYG-HGUT-000/MGYG-HGUT-00018/genomes1/GUT_GENOME025698.gff.gz		1
GUT_GENOME025740	CosteaPI_2017__SID713B042-11-90-0__bin.57	CIBIO	MAG	2166885	116	26341	42.37	97.65	0.88		0	0	0	14		GUT_GENOME140272	MGYG-HGUT-02289	Coprococcus sp000433075	ERS1444588	ERP019502	Kazakhstan	Asia	ftp://ftp.ebi.ac.uk/pub/databases/metagenomics/mgnify_genomes/human-gut/v1.0/all_genomes/MGYG-HGUT-022/MGYG-HGUT-02289/genomes1/GUT_GENOME025740.gff.gz		8
GUT_GENOME025769	CosteaPI_2017__SID713B043-11-90-0__bin.30	CIBIO	MAG	2709363	42	91793	43.41	96.98	0		0	0	8.82	15		GUT_GENOME000055	MGYG-HGUT-00018	Coprococcus eutactus	ERS1444590	ERP019502	Kazakhstan	Asia	ftp://ftp.ebi.ac.uk/pub/databases/metagenomics/mgnify_genomes/human-gut/v1.0/all_genomes/MGYG-HGUT-000/MGYG-HGUT-00018/genomes1/GUT_GENOME025769.gff.gz		1
GUT_GENOME025854	CosteaPI_2017__SID713B046-11-0-0__bin.13	CIBIO	MAG	3023618	36	142975	42.99	97.32	0		0	0	0	17		GUT_GENOME000055	MGYG-HGUT-00018	Coprococcus eutactus	ERS1444593	ERP019502	Kazakhstan	Asia	ftp://ftp.ebi.ac.uk/pub/databases/metagenomics/mgnify_genomes/human-gut/v1.0/all_genomes/MGYG-HGUT-000/MGYG-HGUT-00018/genomes1/GUT_GENOME025854.gff.gz		1
GUT_GENOME025925	CosteaPI_2017__SID713B046-11-90-0__bin.8	CIBIO	MAG	2451884	130	29090	41.56	99.16	0.17		0	24.27	0	14		GUT_GENOME001027	MGYG-HGUT-00189	Coprococcus sp000154245	ERS1444594	ERP019502	Kazakhstan	Asia	ftp://ftp.ebi.ac.uk/pub/databases/metagenomics/mgnify_genomes/human-gut/v1.0/all_genomes/MGYG-HGUT-001/MGYG-HGUT-00189/genomes1/GUT_GENOME025925.gff.gz		5
GUT_GENOME026072	CosteaPI_2017__SID713B052-11-0-0__bin.39	CIBIO	MAG	2855619	25	165018	44.06	98.66	0		0	0	5.44	17		GUT_GENOME001379	MGYG-HGUT-00231	Coprococcus eutactus_A	ERS1444599	ERP019502	Kazakhstan	Asia	ftp://ftp.ebi.ac.uk/pub/databases/metagenomics/mgnify_genomes/human-gut/v1.0/all_genomes/MGYG-HGUT-002/MGYG-HGUT-00231/genomes3/GUT_GENOME026072.gff.gz		2
GUT_GENOME026110	CosteaPI_2017__SID713B052-11-90-0__bin.4	CIBIO	MAG	2676516	17	253436	43.89	96.28	0		0	0	0	17		GUT_GENOME001379	MGYG-HGUT-00231	Coprococcus eutactus_A	ERS1444600	ERP019502	Kazakhstan	Asia	ftp://ftp.ebi.ac.uk/pub/databases/metagenomics/mgnify_genomes/human-gut/v1.0/all_genomes/MGYG-HGUT-002/MGYG-HGUT-00231/genomes3/GUT_GENOME026110.gff.gz		2
GUT_GENOME026191	CosteaPI_2017__SID713B055-11-0-0__bin.22	CIBIO	MAG	2660618	26	188552	41.4	99.33	0		0	0	0	17		GUT_GENOME001027	MGYG-HGUT-00189	Coprococcus sp900066115	ERS1444603	ERP019502	Kazakhstan	Asia	ftp://ftp.ebi.ac.uk/pub/databases/metagenomics/mgnify_genomes/human-gut/v1.0/all_genomes/MGYG-HGUT-001/MGYG-HGUT-00189/genomes2/GUT_GENOME026191.gff.gz		4
GUT_GENOME026631	CosteaPI_2017__SID713B066-11-90-0__bin.14	CIBIO	MAG	2984632	29	167246	43.87	99.33	0.67		0	70.52	37.06	16		GUT_GENOME001379	MGYG-HGUT-00231	Coprococcus eutactus_A	ERS1444620	ERP019502	Kazakhstan	Asia	ftp://ftp.ebi.ac.uk/pub/databases/metagenomics/mgnify_genomes/human-gut/v1.0/all_genomes/MGYG-HGUT-002/MGYG-HGUT-00231/genomes1/GUT_GENOME026631.gff.gz		2
GUT_GENOME026696	CosteaPI_2017__SID713B069-11-0-0__bin.76	CIBIO	MAG	2593962	80	51336	41.32	95.97	0		0	0	0	14		GUT_GENOME001027	MGYG-HGUT-00189	Coprococcus sp000154245	ERS1444621	ERP019502	Kazakhstan	Asia	ftp://ftp.ebi.ac.uk/pub/databases/metagenomics/mgnify_genomes/human-gut/v1.0/all_genomes/MGYG-HGUT-001/MGYG-HGUT-00189/genomes2/GUT_GENOME026696.gff.gz		5
GUT_GENOME026781	CosteaPI_2017__SID713B072-11-0-0__bin.71	CIBIO	MAG	2211804	128	27859	42.35	97.65	0.67		0	0	0	15		GUT_GENOME140272	MGYG-HGUT-02289	Coprococcus sp000433075	ERS1444623	ERP019502	Kazakhstan	Asia	ftp://ftp.ebi.ac.uk/pub/databases/metagenomics/mgnify_genomes/human-gut/v1.0/all_genomes/MGYG-HGUT-022/MGYG-HGUT-02289/genomes1/GUT_GENOME026781.gff.gz		8
GUT_GENOME027038	CosteaPI_2017__thistle1-11-0-0__bin.26	CIBIO	MAG	2810472	82	54037	44.23	99.33	0		0	0	0	16		GUT_GENOME001379	MGYG-HGUT-00231	Coprococcus eutactus_A	ERS1444733	ERP019502	Germany	Europe	ftp://ftp.ebi.ac.uk/pub/databases/metagenomics/mgnify_genomes/human-gut/v1.0/all_genomes/MGYG-HGUT-002/MGYG-HGUT-00231/genomes1/GUT_GENOME027038.gff.gz		2
GUT_GENOME027156	CosteaPI_2017__tigress-11-0-0__bin.31	CIBIO	MAG	2890944	28	167142	42.67	97.32	0		0	0	0	15		GUT_GENOME105828	MGYG-HGUT-01745	Coprococcus sp.	ERS1444737	ERP019502	Germany	Europe	ftp://ftp.ebi.ac.uk/pub/databases/metagenomics/mgnify_genomes/human-gut/v1.0/all_genomes/MGYG-HGUT-017/MGYG-HGUT-01745/genomes1/GUT_GENOME027156.gff.gz		7
GUT_GENOME027212	CosteaPI_2017__tigress-11-60-0__bin.19	CIBIO	MAG	2873839	30	161558	42.73	99.33	0		0	0	0	19		GUT_GENOME105828	MGYG-HGUT-01745	Coprococcus sp.	ERS1444740	ERP019502	Germany	Europe	ftp://ftp.ebi.ac.uk/pub/databases/metagenomics/mgnify_genomes/human-gut/v1.0/all_genomes/MGYG-HGUT-017/MGYG-HGUT-01745/genomes1/GUT_GENOME027212.gff.gz		7
GUT_GENOME027245	CosteaPI_2017__tigress-11-7-0__bin.36	CIBIO	MAG	2965097	31	161668	42.63	99.33	0		0	0	0	16		GUT_GENOME105828	MGYG-HGUT-01745	Coprococcus sp.	ERS1444741	ERP019502	Germany	Europe	ftp://ftp.ebi.ac.uk/pub/databases/metagenomics/mgnify_genomes/human-gut/v1.0/all_genomes/MGYG-HGUT-017/MGYG-HGUT-01745/genomes1/GUT_GENOME027245.gff.gz		7
GUT_GENOME027540	DRR042316_bin.32	EBI	MAG	2775395	19	244574	44.19	99.33	0		0	0	6.36	18	ERZ839643	GUT_GENOME001379	MGYG-HGUT-00231	Coprococcus eutactus_A	DRS026580	DRP003048	Japan	Asia	ftp://ftp.ebi.ac.uk/pub/databases/metagenomics/mgnify_genomes/human-gut/v1.0/all_genomes/MGYG-HGUT-002/MGYG-HGUT-00231/genomes1/GUT_GENOME027540.gff.gz		2
GUT_GENOME027718	DRR042352_bin.3	EBI	MAG	2898018	43	93028	43.72	98.55	0.67		0	0	6.26	19	ERZ839857	GUT_GENOME103893	MGYG-HGUT-01714	Coprococcus_A catus	DRS026601	DRP003048	Japan	Asia	ftp://ftp.ebi.ac.uk/pub/databases/metagenomics/mgnify_genomes/human-gut/v1.0/all_genomes/MGYG-HGUT-017/MGYG-HGUT-01714/genomes1/GUT_GENOME027718.gff.gz		9
GUT_GENOME028168	DRR042489_bin.13	EBI	MAG	2678375	14	302233	41.16	97.99	0		0	24.27	6.53	17	ERZ842519	GUT_GENOME001027	MGYG-HGUT-00189	Coprococcus sp900066115	DRS026418	DRP003048	Japan	Asia	ftp://ftp.ebi.ac.uk/pub/databases/metagenomics/mgnify_genomes/human-gut/v1.0/all_genomes/MGYG-HGUT-001/MGYG-HGUT-00189/genomes1/GUT_GENOME028168.gff.gz		4
GUT_GENOME030845	ERR1018272_bin.3	EBI	MAG	2377140	184	18630	41.64	95.58	0.02		0	0	5.78	10	ERZ861411	GUT_GENOME001027	MGYG-HGUT-00189	Coprococcus sp900066115	ERS848705	ERP012177	China	Asia	ftp://ftp.ebi.ac.uk/pub/databases/metagenomics/mgnify_genomes/human-gut/v1.0/all_genomes/MGYG-HGUT-001/MGYG-HGUT-00189/genomes2/GUT_GENOME030845.gff.gz		4
GUT_GENOME031660	ERR1190534_bin.52	EBI	MAG	2510647	39	102485	41.44	98.66	0		0	0	5.78	14	ERZ877032	GUT_GENOME001027	MGYG-HGUT-00189	Coprococcus sp900066115	ERS1015609	ERP013562	China	Asia	ftp://ftp.ebi.ac.uk/pub/databases/metagenomics/mgnify_genomes/human-gut/v1.0/all_genomes/MGYG-HGUT-001/MGYG-HGUT-00189/genomes2/GUT_GENOME031660.gff.gz		4
GUT_GENOME031873	ERR1190546_bin.8	EBI	MAG	2287045	12	221782	44.41	96.46	0		0	0	11.21	17	ERZ877238	GUT_GENOME001379	MGYG-HGUT-00231	Coprococcus eutactus_A	ERS1015621	ERP013562	China	Asia	ftp://ftp.ebi.ac.uk/pub/databases/metagenomics/mgnify_genomes/human-gut/v1.0/all_genomes/MGYG-HGUT-002/MGYG-HGUT-00231/genomes1/GUT_GENOME031873.gff.gz		2
GUT_GENOME033907	ERR1190658_bin.60	EBI	MAG	2833873	32	172126	44.27	99.31	0		0	22.96	10.74	16	ERZ879456	GUT_GENOME001379	MGYG-HGUT-00231	Coprococcus eutactus_A	ERS1015733	ERP013562	China	Asia	ftp://ftp.ebi.ac.uk/pub/databases/metagenomics/mgnify_genomes/human-gut/v1.0/all_genomes/MGYG-HGUT-002/MGYG-HGUT-00231/genomes1/GUT_GENOME033907.gff.gz		2
GUT_GENOME034364	ERR1190794_bin.58	EBI	MAG	2248346	40	87999	41.53	95.3	0.67		0	0	0	12	ERZ869292	GUT_GENOME001027	MGYG-HGUT-00189	Coprococcus sp900066115	ERS1015869	ERP013563	China	Asia	ftp://ftp.ebi.ac.uk/pub/databases/metagenomics/mgnify_genomes/human-gut/v1.0/all_genomes/MGYG-HGUT-001/MGYG-HGUT-00189/genomes1/GUT_GENOME034364.gff.gz		4
GUT_GENOME034430	ERR1190797_bin.68	EBI	MAG	2658817	26	140189	44.28	97.81	0.34		0	0	5.37	16	ERZ869356	GUT_GENOME001379	MGYG-HGUT-00231	Coprococcus eutactus_A	ERS1015872	ERP013563	China	Asia	ftp://ftp.ebi.ac.uk/pub/databases/metagenomics/mgnify_genomes/human-gut/v1.0/all_genomes/MGYG-HGUT-002/MGYG-HGUT-00231/genomes2/GUT_GENOME034430.gff.gz		2
GUT_GENOME034785	ERR1190816_bin.7	EBI	MAG	2322738	91	37934	41.64	96.09	0.67		0	0	0	11	ERZ869731	GUT_GENOME001027	MGYG-HGUT-00189	Coprococcus sp900066115	ERS1015891	ERP013563	China	Asia	ftp://ftp.ebi.ac.uk/pub/databases/metagenomics/mgnify_genomes/human-gut/v1.0/all_genomes/MGYG-HGUT-001/MGYG-HGUT-00189/genomes1/GUT_GENOME034785.gff.gz		4
GUT_GENOME035968	ERR1190873_bin.8	EBI	MAG	2467718	36	89545	41.26	95.24	0.67		0	0	10.74	14	ERZ871240	GUT_GENOME001027	MGYG-HGUT-00189	Coprococcus sp900066115	ERS1015948	ERP013563	China	Asia	ftp://ftp.ebi.ac.uk/pub/databases/metagenomics/mgnify_genomes/human-gut/v1.0/all_genomes/MGYG-HGUT-001/MGYG-HGUT-00189/genomes1/GUT_GENOME035968.gff.gz		4
GUT_GENOME035986	ERR1190874_bin.41	EBI	MAG	2591606	55	73986	40.94	97.99	0.67		0	0	10.74	16	ERZ871273	GUT_GENOME001027	MGYG-HGUT-00189	Coprococcus sp900066115	ERS1015949	ERP013563	China	Asia	ftp://ftp.ebi.ac.uk/pub/databases/metagenomics/mgnify_genomes/human-gut/v1.0/all_genomes/MGYG-HGUT-001/MGYG-HGUT-00189/genomes2/GUT_GENOME035986.gff.gz		4
GUT_GENOME037362	ERR1190928_bin.41	EBI	MAG	2667162	30	138764	44.38	99.33	0		0	0	10.29	15	ERZ872710	GUT_GENOME001379	MGYG-HGUT-00231	Coprococcus eutactus_A	ERS1016003	ERP013563	China	Asia	ftp://ftp.ebi.ac.uk/pub/databases/metagenomics/mgnify_genomes/human-gut/v1.0/all_genomes/MGYG-HGUT-002/MGYG-HGUT-00231/genomes4/GUT_GENOME037362.gff.gz		2
GUT_GENOME037632	ERR1190939_bin.81	EBI	MAG	2578695	29	202072	41.27	99.33	0		0	0	0	18	ERZ872998	GUT_GENOME001027	MGYG-HGUT-00189	Coprococcus sp900066115	ERS1016014	ERP013563	China	Asia	ftp://ftp.ebi.ac.uk/pub/databases/metagenomics/mgnify_genomes/human-gut/v1.0/all_genomes/MGYG-HGUT-001/MGYG-HGUT-00189/genomes1/GUT_GENOME037632.gff.gz		4
GUT_GENOME038038	ERR1190956_bin.63	EBI	MAG	2816126	34	133588	44.07	99.18	0		0	0	9.3	13	ERZ873442	GUT_GENOME001379	MGYG-HGUT-00231	Coprococcus eutactus_A	ERS1016031	ERP013563	China	Asia	ftp://ftp.ebi.ac.uk/pub/databases/metagenomics/mgnify_genomes/human-gut/v1.0/all_genomes/MGYG-HGUT-002/MGYG-HGUT-00231/genomes1/GUT_GENOME038038.gff.gz		2
GUT_GENOME038827	ERR1293550_bin.9	EBI	MAG	2953822	46	99546	43.96	98.66	0.31		0	25.11	0	18	ERZ927041	GUT_GENOME001379	MGYG-HGUT-00231	Coprococcus eutactus_A	ERS1066647	ERP013933	United States	North America	ftp://ftp.ebi.ac.uk/pub/databases/metagenomics/mgnify_genomes/human-gut/v1.0/all_genomes/MGYG-HGUT-002/MGYG-HGUT-00231/genomes2/GUT_GENOME038827.gff.gz		2
GUT_GENOME041719	ERR1293908_bin.17	EBI	MAG	2761027	79	52016	43.26	96.4	0		0	25.11	11.21	14	ERZ930626	GUT_GENOME000055	MGYG-HGUT-00018	Coprococcus eutactus	ERS1066736	ERP013933	United States	North America	ftp://ftp.ebi.ac.uk/pub/databases/metagenomics/mgnify_genomes/human-gut/v1.0/all_genomes/MGYG-HGUT-000/MGYG-HGUT-00018/genomes1/GUT_GENOME041719.gff.gz		1
GUT_GENOME042476	ERR1297706_bin.6	EBI	MAG	2741033	33	122444	44.32	98.66	0		0	25.11	9.3	17	ERZ874384	GUT_GENOME001379	MGYG-HGUT-00231	Coprococcus eutactus_A	ERS1069675	ERP013827	Netherlands	Europe	ftp://ftp.ebi.ac.uk/pub/databases/metagenomics/mgnify_genomes/human-gut/v1.0/all_genomes/MGYG-HGUT-002/MGYG-HGUT-00231/genomes1/GUT_GENOME042476.gff.gz		2
GUT_GENOME043248	ERR1297815_bin.6	EBI	MAG	2898412	38	95338	44.02	97.32	0		0	0	9.3	16	ERZ875222	GUT_GENOME001379	MGYG-HGUT-00231	Coprococcus eutactus_A	ERS1069669	ERP013827	Netherlands	Europe	ftp://ftp.ebi.ac.uk/pub/databases/metagenomics/mgnify_genomes/human-gut/v1.0/all_genomes/MGYG-HGUT-002/MGYG-HGUT-00231/genomes2/GUT_GENOME043248.gff.gz		2
GUT_GENOME043541	ERR1305878_bin.17	EBI	MAG	2919885	36	104765	44.03	99.33	0.67		0	0	11.21	17	ERZ832943	GUT_GENOME001379	MGYG-HGUT-00231	Coprococcus eutactus_A	ERS1076041	ERP014480	Denmark	Europe	ftp://ftp.ebi.ac.uk/pub/databases/metagenomics/mgnify_genomes/human-gut/v1.0/all_genomes/MGYG-HGUT-002/MGYG-HGUT-00231/genomes4/GUT_GENOME043541.gff.gz		2
GUT_GENOME044202	ERR1305900_bin.2	EBI	MAG	2799446	29	135728	42.98	97.32	0.06		0	0	0	14	ERZ833789	GUT_GENOME000055	MGYG-HGUT-00018	Coprococcus eutactus	ERS1076059	ERP014480	Denmark	Europe	ftp://ftp.ebi.ac.uk/pub/databases/metagenomics/mgnify_genomes/human-gut/v1.0/all_genomes/MGYG-HGUT-000/MGYG-HGUT-00018/genomes1/GUT_GENOME044202.gff.gz		1
GUT_GENOME044621	ERR1578626_bin.36	EBI	MAG	2797740	28	191369	44.13	98.29	0.67		0	0	10.74	15	ERZ847598	GUT_GENOME001379	MGYG-HGUT-00231	Coprococcus eutactus_A	ERS1289684	ERP016813	China	Asia	ftp://ftp.ebi.ac.uk/pub/databases/metagenomics/mgnify_genomes/human-gut/v1.0/all_genomes/MGYG-HGUT-002/MGYG-HGUT-00231/genomes1/GUT_GENOME044621.gff.gz		2
GUT_GENOME044699	ERR1578630_bin.17	EBI	MAG	2516749	45	90314	41.28	97.62	0		0	0	11.21	15	ERZ847685	GUT_GENOME001027	MGYG-HGUT-00189	Coprococcus sp900066115	ERS1289688	ERP016813	China	Asia	ftp://ftp.ebi.ac.uk/pub/databases/metagenomics/mgnify_genomes/human-gut/v1.0/all_genomes/MGYG-HGUT-001/MGYG-HGUT-00189/genomes1/GUT_GENOME044699.gff.gz		4
GUT_GENOME044718	ERR1578630_bin.57	EBI	MAG	2804229	40	109276	43.98	98.41	0.67		0	0	5.78	14	ERZ847699	GUT_GENOME001379	MGYG-HGUT-00231	Coprococcus eutactus_A	ERS1289688	ERP016813	China	Asia	ftp://ftp.ebi.ac.uk/pub/databases/metagenomics/mgnify_genomes/human-gut/v1.0/all_genomes/MGYG-HGUT-002/MGYG-HGUT-00231/genomes3/GUT_GENOME044718.gff.gz		2
GUT_GENOME044942	ERR1578643_bin.10	EBI	MAG	2485807	46	88371	41.15	96.83	0.34		0	0	0	14	ERZ848003	GUT_GENOME001027	MGYG-HGUT-00189	Coprococcus sp900066115	ERS1289701	ERP016813	China	Asia	ftp://ftp.ebi.ac.uk/pub/databases/metagenomics/mgnify_genomes/human-gut/v1.0/all_genomes/MGYG-HGUT-001/MGYG-HGUT-00189/genomes2/GUT_GENOME044942.gff.gz		4
GUT_GENOME046626	ERR1620331_bin.71	EBI	MAG	2883794	23	245686	43.99	99.33	0		0	25.11	10.74	17	ERZ850864	GUT_GENOME001379	MGYG-HGUT-00231	Coprococcus eutactus_A	ERS1343393	ERP017091	China	Asia	ftp://ftp.ebi.ac.uk/pub/databases/metagenomics/mgnify_genomes/human-gut/v1.0/all_genomes/MGYG-HGUT-002/MGYG-HGUT-00231/genomes2/GUT_GENOME046626.gff.gz		2
GUT_GENOME047991	ERR1912997_bin.18	EBI	MAG	3116422	32	198320	42.45	99.33	0.31		0	0	29.61	15	ERZ867672	GUT_GENOME000055	MGYG-HGUT-00018	Coprococcus eutactus	ERS1647335	ERP019674	Germany	Europe	ftp://ftp.ebi.ac.uk/pub/databases/metagenomics/mgnify_genomes/human-gut/v1.0/all_genomes/MGYG-HGUT-000/MGYG-HGUT-00018/genomes1/GUT_GENOME047991.gff.gz		1
GUT_GENOME049028	ERR1913093_bin.4	EBI	MAG	2876536	47	85973	44.07	95.91	0.67		0	23.22	32.96	15	ERZ868766	GUT_GENOME001379	MGYG-HGUT-00231	Coprococcus eutactus_A	ERS1647283	ERP019674	Germany	Europe	ftp://ftp.ebi.ac.uk/pub/databases/metagenomics/mgnify_genomes/human-gut/v1.0/all_genomes/MGYG-HGUT-002/MGYG-HGUT-00231/genomes2/GUT_GENOME049028.gff.gz		2
GUT_GENOME049218	ERR1913114_bin.17	EBI	MAG	2801503	96	56521	44.31	99.06	0.34		0	0	9.3	17	ERZ868977	GUT_GENOME001379	MGYG-HGUT-00231	Coprococcus eutactus_A	ERS1647314	ERP019674	Germany	Europe	ftp://ftp.ebi.ac.uk/pub/databases/metagenomics/mgnify_genomes/human-gut/v1.0/all_genomes/MGYG-HGUT-002/MGYG-HGUT-00231/genomes1/GUT_GENOME049218.gff.gz		2
GUT_GENOME049441	ERR1953519_bin.16	EBI	MAG	2523021	25	191905	44.1	97.99	0		0	0	0	15	ERZ830040	GUT_GENOME001379	MGYG-HGUT-00231	Coprococcus eutactus_A	ERS1295851	ERP022699	United Kingdom	Europe	ftp://ftp.ebi.ac.uk/pub/databases/metagenomics/mgnify_genomes/human-gut/v1.0/all_genomes/MGYG-HGUT-002/MGYG-HGUT-00231/genomes1/GUT_GENOME049441.gff.gz		2
GUT_GENOME049710	ERR2013559_bin.20	EBI	MAG	2966635	36	103926	43.36	97.28	0		0	23.22	5.37	15	ERZ851783	GUT_GENOME001379	MGYG-HGUT-00231	Coprococcus eutactus_A	ERS1487529	ERP020710	China	Asia	ftp://ftp.ebi.ac.uk/pub/databases/metagenomics/mgnify_genomes/human-gut/v1.0/all_genomes/MGYG-HGUT-002/MGYG-HGUT-00231/genomes1/GUT_GENOME049710.gff.gz		2
GUT_GENOME049747	ERR2013560_bin.58	EBI	MAG	3013679	50	122548	44.09	97.36	0.67		0	0	5.44	16	ERZ851811	GUT_GENOME001379	MGYG-HGUT-00231	Coprococcus eutactus_A	ERS1487530	ERP020710	China	Asia	ftp://ftp.ebi.ac.uk/pub/databases/metagenomics/mgnify_genomes/human-gut/v1.0/all_genomes/MGYG-HGUT-002/MGYG-HGUT-00231/genomes3/GUT_GENOME049747.gff.gz		2
GUT_GENOME049924	ERR2013583_bin.57	EBI	MAG	2706963	26	184734	44.1	98.66	0.12		0	0	11.38	17	ERZ852007	GUT_GENOME001379	MGYG-HGUT-00231	Coprococcus eutactus_A	ERS1487553	ERP020710	China	Asia	ftp://ftp.ebi.ac.uk/pub/databases/metagenomics/mgnify_genomes/human-gut/v1.0/all_genomes/MGYG-HGUT-002/MGYG-HGUT-00231/genomes4/GUT_GENOME049924.gff.gz		2
GUT_GENOME050919	ERR209340_bin.6	EBI	MAG	2839666	155	29628	44.07	96.52	0.41		0	0	33.47	14	ERZ966257	GUT_GENOME001379	MGYG-HGUT-00231	Coprococcus eutactus_A	ERS199105	ERP002061	Denmark	Europe	ftp://ftp.ebi.ac.uk/pub/databases/metagenomics/mgnify_genomes/human-gut/v1.0/all_genomes/MGYG-HGUT-002/MGYG-HGUT-00231/genomes1/GUT_GENOME050919.gff.gz		2
GUT_GENOME051678	ERR209502_bin.14	EBI	MAG	2827636	35	123683	44.14	98.66	0		0	46.58	0	17	ERZ967078	GUT_GENOME001379	MGYG-HGUT-00231	Coprococcus eutactus_A	ERS199162	ERP002061	Denmark	Europe	ftp://ftp.ebi.ac.uk/pub/databases/metagenomics/mgnify_genomes/human-gut/v1.0/all_genomes/MGYG-HGUT-002/MGYG-HGUT-00231/genomes2/GUT_GENOME051678.gff.gz		2
GUT_GENOME051984	ERR209586_bin.1	EBI	MAG	2757811	55	68160	41.33	99.33	0		0	0	10.74	17	ERZ967408	GUT_GENOME001027	MGYG-HGUT-00189	Coprococcus sp900066115	ERS199215	ERP002061	Spain	Europe	ftp://ftp.ebi.ac.uk/pub/databases/metagenomics/mgnify_genomes/human-gut/v1.0/all_genomes/MGYG-HGUT-001/MGYG-HGUT-00189/genomes1/GUT_GENOME051984.gff.gz		4
GUT_GENOME054930	ERR321462_bin.17	EBI	MAG	2374590	190	17729	41.28	95.17	0.34		0	0	0	11	ERZ959093	GUT_GENOME103847	MGYG-HGUT-01707	Coprococcus sp000154245	ERS328851	ERP003612	Denmark	Europe	ftp://ftp.ebi.ac.uk/pub/databases/metagenomics/mgnify_genomes/human-gut/v1.0/all_genomes/MGYG-HGUT-017/MGYG-HGUT-01707/genomes1/GUT_GENOME054930.gff.gz		5
GUT_GENOME056280	ERR414314_bin.22	EBI	MAG	2804118	48	85540	43	97.99	0.78		0	18.46	11.21	14	ERZ897022	GUT_GENOME000055	MGYG-HGUT-00018	Coprococcus eutactus	ERS396367	ERP004605	Denmark	Europe	ftp://ftp.ebi.ac.uk/pub/databases/metagenomics/mgnify_genomes/human-gut/v1.0/all_genomes/MGYG-HGUT-000/MGYG-HGUT-00018/genomes1/GUT_GENOME056280.gff.gz		1
GUT_GENOME056725	ERR414334_bin.38	EBI	MAG	2628580	41	98011	44.01	97.32	0		0	0	0	14	ERZ898153	GUT_GENOME001379	MGYG-HGUT-00231	Coprococcus eutactus_A	ERS396385	ERP004605	Denmark	Europe	ftp://ftp.ebi.ac.uk/pub/databases/metagenomics/mgnify_genomes/human-gut/v1.0/all_genomes/MGYG-HGUT-002/MGYG-HGUT-00231/genomes2/GUT_GENOME056725.gff.gz		2
GUT_GENOME056828	ERR414339_bin.37	EBI	MAG	2752215	41	144838	43.14	98.66	0.28		0	0	10.74	15	ERZ898313	GUT_GENOME000055	MGYG-HGUT-00018	Coprococcus eutactus	ERS396390	ERP004605	Denmark	Europe	ftp://ftp.ebi.ac.uk/pub/databases/metagenomics/mgnify_genomes/human-gut/v1.0/all_genomes/MGYG-HGUT-000/MGYG-HGUT-00018/genomes1/GUT_GENOME056828.gff.gz		1
GUT_GENOME056865	ERR414340_bin.5	EBI	MAG	2597861	26	123918	41.38	96.64	0.67		0	23.22	11.21	16	ERZ898349	GUT_GENOME103847	MGYG-HGUT-01707	Coprococcus sp000154245	ERS396391	ERP004605	Denmark	Europe	ftp://ftp.ebi.ac.uk/pub/databases/metagenomics/mgnify_genomes/human-gut/v1.0/all_genomes/MGYG-HGUT-017/MGYG-HGUT-01707/genomes1/GUT_GENOME056865.gff.gz		5
GUT_GENOME057128	ERR414353_bin.8	EBI	MAG	2815921	82	66406	42.53	96.32	0.61		0	0	0	15	ERZ898734	GUT_GENOME095993	MGYG-HGUT-01315	Coprococcus comes	ERS396403	ERP004605	Spain	Europe	ftp://ftp.ebi.ac.uk/pub/databases/metagenomics/mgnify_genomes/human-gut/v1.0/all_genomes/MGYG-HGUT-013/MGYG-HGUT-01315/genomes1/GUT_GENOME057128.gff.gz		3
GUT_GENOME057262	ERR414360_bin.38	EBI	MAG	2594698	42	92882	41.07	97.99	0		0	0	0	17	ERZ898903	GUT_GENOME001027	MGYG-HGUT-00189	Coprococcus sp000154245	ERS396410	ERP004605	Spain	Europe	ftp://ftp.ebi.ac.uk/pub/databases/metagenomics/mgnify_genomes/human-gut/v1.0/all_genomes/MGYG-HGUT-001/MGYG-HGUT-00189/genomes1/GUT_GENOME057262.gff.gz		5
GUT_GENOME059061	ERR525751_bin.9	EBI	MAG	2720629	45	92961	44.2	97.99	0.67		0	0	10.74	16	ERZ900418	GUT_GENOME001379	MGYG-HGUT-00231	Coprococcus eutactus_A	ERS473086	ERP005989	Denmark	Europe	ftp://ftp.ebi.ac.uk/pub/databases/metagenomics/mgnify_genomes/human-gut/v1.0/all_genomes/MGYG-HGUT-002/MGYG-HGUT-00231/genomes1/GUT_GENOME059061.gff.gz		2
GUT_GENOME059084	ERR525753_bin.38	EBI	MAG	2653654	36	112656	41.59	98.32	0.02		0	25.11	11.35	16	ERZ900455	GUT_GENOME001027	MGYG-HGUT-00189	Coprococcus sp900066115	ERS473088	ERP005989	Denmark	Europe	ftp://ftp.ebi.ac.uk/pub/databases/metagenomics/mgnify_genomes/human-gut/v1.0/all_genomes/MGYG-HGUT-001/MGYG-HGUT-00189/genomes1/GUT_GENOME059084.gff.gz		4
GUT_GENOME059127	ERR525757_bin.14	EBI	MAG	2804630	31	144982	43.11	99.33	0		0	22.96	66.32	17	ERZ900509	GUT_GENOME000055	MGYG-HGUT-00018	Coprococcus eutactus	ERS473092	ERP005989	Denmark	Europe	ftp://ftp.ebi.ac.uk/pub/databases/metagenomics/mgnify_genomes/human-gut/v1.0/all_genomes/MGYG-HGUT-000/MGYG-HGUT-00018/genomes1/GUT_GENOME059127.gff.gz		1
GUT_GENOME059886	ERR525828_bin.39	EBI	MAG	2773693	62	74149	44.28	97.99	0		0	25.11	5.44	15	ERZ901295	GUT_GENOME001379	MGYG-HGUT-00231	Coprococcus eutactus_A	ERS473163	ERP005989	Denmark	Europe	ftp://ftp.ebi.ac.uk/pub/databases/metagenomics/mgnify_genomes/human-gut/v1.0/all_genomes/MGYG-HGUT-002/MGYG-HGUT-00231/genomes3/GUT_GENOME059886.gff.gz		2
GUT_GENOME059925	ERR525831_bin.31	EBI	MAG	2830836	58	87853	44.13	99.33	0.5		0	25.11	9.3	15	ERZ901326	GUT_GENOME001379	MGYG-HGUT-00231	Coprococcus eutactus_A	ERS473166	ERP005989	Denmark	Europe	ftp://ftp.ebi.ac.uk/pub/databases/metagenomics/mgnify_genomes/human-gut/v1.0/all_genomes/MGYG-HGUT-002/MGYG-HGUT-00231/genomes1/GUT_GENOME059925.gff.gz		2
GUT_GENOME062172	ERR526019_bin.31	EBI	MAG	2552094	45	93887	41.4	95.81	0.02		0	0	11.21	15	ERZ903884	GUT_GENOME001027	MGYG-HGUT-00189	Coprococcus sp900066115	ERS473354	ERP005989	Denmark	Europe	ftp://ftp.ebi.ac.uk/pub/databases/metagenomics/mgnify_genomes/human-gut/v1.0/all_genomes/MGYG-HGUT-001/MGYG-HGUT-00189/genomes2/GUT_GENOME062172.gff.gz		4
GUT_GENOME064063	ERR589588_bin.21	EBI	MAG	2541747	39	136056	41.43	97.32	0.67		0	0	0	16	ERZ876561	GUT_GENOME103847	MGYG-HGUT-01707	Coprococcus sp900066115	ERS537259	ERP006678	China	Asia	ftp://ftp.ebi.ac.uk/pub/databases/metagenomics/mgnify_genomes/human-gut/v1.0/all_genomes/MGYG-HGUT-017/MGYG-HGUT-01707/genomes1/GUT_GENOME064063.gff.gz		4
GUT_GENOME065744	ERR911953_bin.39	EBI	MAG	2698461	31	160048	41.26	99.33	0.34		0	28.25	11.21	14	ERZ876691	GUT_GENOME103847	MGYG-HGUT-01707	Coprococcus sp000154245	ERS746710	ERP010700	United Kingdom	Europe	ftp://ftp.ebi.ac.uk/pub/databases/metagenomics/mgnify_genomes/human-gut/v1.0/all_genomes/MGYG-HGUT-017/MGYG-HGUT-01707/genomes1/GUT_GENOME065744.gff.gz		5
GUT_GENOME065897	ERR911961_bin.64	EBI	MAG	2791615	47	97163	44.13	98.07	0		0	0	10.29	14	ERZ876851	GUT_GENOME001379	MGYG-HGUT-00231	Coprococcus eutactus_A	ERS746718	ERP010700	United Kingdom	Europe	ftp://ftp.ebi.ac.uk/pub/databases/metagenomics/mgnify_genomes/human-gut/v1.0/all_genomes/MGYG-HGUT-002/MGYG-HGUT-00231/genomes3/GUT_GENOME065897.gff.gz		2
GUT_GENOME066316	ERS235506_57	HGM	MAG	2816770	31	121004	44.05	97.32	0		0	25.7	0	17		GUT_GENOME001379	MGYG-HGUT-00231	Coprococcus eutactus_A	ERS235506	ERP002469	Sweden	Europe	ftp://ftp.ebi.ac.uk/pub/databases/metagenomics/mgnify_genomes/human-gut/v1.0/all_genomes/MGYG-HGUT-002/MGYG-HGUT-00231/genomes1/GUT_GENOME066316.gff.gz		2
GUT_GENOME066334	ERS235507_58	HGM	MAG	2617332	22	162930	44.03	98.66	0		0	0	5.44	18		GUT_GENOME001379	MGYG-HGUT-00231	Coprococcus eutactus_A	ERS235507	ERP002469	Sweden	Europe	ftp://ftp.ebi.ac.uk/pub/databases/metagenomics/mgnify_genomes/human-gut/v1.0/all_genomes/MGYG-HGUT-002/MGYG-HGUT-00231/genomes3/GUT_GENOME066334.gff.gz		2
GUT_GENOME066404	ERS235513_10	HGM	MAG	2947168	22	375455	44	99.33	0		0	0	0	17		GUT_GENOME001379	MGYG-HGUT-00231	Coprococcus eutactus_A	ERS235513	ERP002469	Sweden	Europe	ftp://ftp.ebi.ac.uk/pub/databases/metagenomics/mgnify_genomes/human-gut/v1.0/all_genomes/MGYG-HGUT-002/MGYG-HGUT-00231/genomes1/GUT_GENOME066404.gff.gz		2
GUT_GENOME066639	ERS235528_63	HGM	MAG	2780643	29	184425	43.09	96.64	0		0	0	0	18		GUT_GENOME000055	MGYG-HGUT-00018	Coprococcus eutactus	ERS235528	ERP002469	Sweden	Europe	ftp://ftp.ebi.ac.uk/pub/databases/metagenomics/mgnify_genomes/human-gut/v1.0/all_genomes/MGYG-HGUT-000/MGYG-HGUT-00018/genomes1/GUT_GENOME066639.gff.gz		1
GUT_GENOME066754	ERS235533_26	HGM	MAG	2859249	32	114935	44.05	99.33	0		0	0	13.85	19		GUT_GENOME001379	MGYG-HGUT-00231	Coprococcus eutactus_A	ERS235533	ERP002469	Sweden	Europe	ftp://ftp.ebi.ac.uk/pub/databases/metagenomics/mgnify_genomes/human-gut/v1.0/all_genomes/MGYG-HGUT-002/MGYG-HGUT-00231/genomes1/GUT_GENOME066754.gff.gz		2
GUT_GENOME067029	ERS235544_32	HGM	MAG	2758897	30	148781	44.23	99.33	0		0	0	0	16		GUT_GENOME001379	MGYG-HGUT-00231	Coprococcus eutactus_A	ERS235544	ERP002469	Sweden	Europe	ftp://ftp.ebi.ac.uk/pub/databases/metagenomics/mgnify_genomes/human-gut/v1.0/all_genomes/MGYG-HGUT-002/MGYG-HGUT-00231/genomes3/GUT_GENOME067029.gff.gz		2
GUT_GENOME067208	ERS235550_66	HGM	MAG	2618064	25	172378	44.14	97.32	0		0	0	5.03	18		GUT_GENOME001379	MGYG-HGUT-00231	Coprococcus eutactus_A	ERS235550	ERP002469	Sweden	Europe	ftp://ftp.ebi.ac.uk/pub/databases/metagenomics/mgnify_genomes/human-gut/v1.0/all_genomes/MGYG-HGUT-002/MGYG-HGUT-00231/genomes2/GUT_GENOME067208.gff.gz		2
GUT_GENOME067364	ERS235556_5	HGM	MAG	2957216	22	165778	43.55	99.33	0.22		0	0	5.44	18		GUT_GENOME001379	MGYG-HGUT-00231	Coprococcus eutactus_A	ERS235556	ERP002469	Sweden	Europe	ftp://ftp.ebi.ac.uk/pub/databases/metagenomics/mgnify_genomes/human-gut/v1.0/all_genomes/MGYG-HGUT-002/MGYG-HGUT-00231/genomes1/GUT_GENOME067364.gff.gz		2
GUT_GENOME067552	ERS235564_52	HGM	MAG	2854959	26	231641	44.05	99.33	0		0	0	0	18		GUT_GENOME001379	MGYG-HGUT-00231	Coprococcus eutactus_A	ERS235564	ERP002469	Sweden	Europe	ftp://ftp.ebi.ac.uk/pub/databases/metagenomics/mgnify_genomes/human-gut/v1.0/all_genomes/MGYG-HGUT-002/MGYG-HGUT-00231/genomes1/GUT_GENOME067552.gff.gz		2
GUT_GENOME067732	ERS235573_28	HGM	MAG	2654333	48	84550	44.28	97.99	0.67		0	0	0	15		GUT_GENOME001379	MGYG-HGUT-00231	Coprococcus eutactus_A	ERS235573	ERP002469	Sweden	Europe	ftp://ftp.ebi.ac.uk/pub/databases/metagenomics/mgnify_genomes/human-gut/v1.0/all_genomes/MGYG-HGUT-002/MGYG-HGUT-00231/genomes1/GUT_GENOME067732.gff.gz		2
GUT_GENOME067945	ERS235590_17	HGM	MAG	2803384	69	157494	41.21	99.33	0		0	99.67	90.53	17		GUT_GENOME103847	MGYG-HGUT-01707	Coprococcus sp000154245	ERS235590	ERP002469	Sweden	Europe	ftp://ftp.ebi.ac.uk/pub/databases/metagenomics/mgnify_genomes/human-gut/v1.0/all_genomes/MGYG-HGUT-017/MGYG-HGUT-01707/genomes1/GUT_GENOME067945.gff.gz		5
GUT_GENOME068317	ERS235613_39	HGM	MAG	2837134	123	125270	41.35	96.64	0		0	99.67	90.43	20		GUT_GENOME001027	MGYG-HGUT-00189	Coprococcus sp900066115	ERS235613	ERP002469	Sweden	Europe	ftp://ftp.ebi.ac.uk/pub/databases/metagenomics/mgnify_genomes/human-gut/v1.0/all_genomes/MGYG-HGUT-001/MGYG-HGUT-00189/genomes2/GUT_GENOME068317.gff.gz		4
GUT_GENOME068387	ERS235617_44	HGM	MAG	2601372	74	53831	44.36	98.66	0		0	0	5.03	15		GUT_GENOME001379	MGYG-HGUT-00231	Coprococcus eutactus_A	ERS235617	ERP002469	Sweden	Europe	ftp://ftp.ebi.ac.uk/pub/databases/metagenomics/mgnify_genomes/human-gut/v1.0/all_genomes/MGYG-HGUT-002/MGYG-HGUT-00231/genomes2/GUT_GENOME068387.gff.gz		2
GUT_GENOME068546	ERS235625_19	HGM	MAG	2759637	89	151520	41.24	96.64	0		0	27.92	0	16		GUT_GENOME001027	MGYG-HGUT-00189	Coprococcus sp900066115	ERS235625	ERP002469	Sweden	Europe	ftp://ftp.ebi.ac.uk/pub/databases/metagenomics/mgnify_genomes/human-gut/v1.0/all_genomes/MGYG-HGUT-001/MGYG-HGUT-00189/genomes1/GUT_GENOME068546.gff.gz		4
GUT_GENOME068707	ERS235631_58	HGM	MAG	2662667	32	105561	44.06	95.3	0		0	0	5.03	16		GUT_GENOME001379	MGYG-HGUT-00231	Coprococcus eutactus_A	ERS235631	ERP002469	Sweden	Europe	ftp://ftp.ebi.ac.uk/pub/databases/metagenomics/mgnify_genomes/human-gut/v1.0/all_genomes/MGYG-HGUT-002/MGYG-HGUT-00231/genomes1/GUT_GENOME068707.gff.gz		2
GUT_GENOME068744	ERS235638_15	HGM	MAG	2774526	38	114568	43.08	96.48	0		0	0	0	18		GUT_GENOME000055	MGYG-HGUT-00018	Coprococcus eutactus	ERS235638	ERP002469	Sweden	Europe	ftp://ftp.ebi.ac.uk/pub/databases/metagenomics/mgnify_genomes/human-gut/v1.0/all_genomes/MGYG-HGUT-000/MGYG-HGUT-00018/genomes1/GUT_GENOME068744.gff.gz		1
GUT_GENOME068838	ERS396295_82	HGM	MAG	2611776	60	62744	43.03	95.13	0.13		0	0	0	16		GUT_GENOME000055	MGYG-HGUT-00018	Coprococcus eutactus	ERS396295	ERP004605	Denmark	Europe	ftp://ftp.ebi.ac.uk/pub/databases/metagenomics/mgnify_genomes/human-gut/v1.0/all_genomes/MGYG-HGUT-000/MGYG-HGUT-00018/genomes1/GUT_GENOME068838.gff.gz		1
GUT_GENOME069799	ERS396331_57	HGM	MAG	2581909	289	12220	44.36	97.48	0.11		0	16.76	0	15		GUT_GENOME001379	MGYG-HGUT-00231	Coprococcus eutactus_A	ERS396331	ERP004605	Denmark	Europe	ftp://ftp.ebi.ac.uk/pub/databases/metagenomics/mgnify_genomes/human-gut/v1.0/all_genomes/MGYG-HGUT-002/MGYG-HGUT-00231/genomes1/GUT_GENOME069799.gff.gz		2
GUT_GENOME070912	ERS396374_106	HGM	MAG	2808983	71	72070	42.75	99.33	0.17		0	0	0	17		GUT_GENOME105828	MGYG-HGUT-01745	Coprococcus sp.	ERS396374	ERP004605	Denmark	Europe	ftp://ftp.ebi.ac.uk/pub/databases/metagenomics/mgnify_genomes/human-gut/v1.0/all_genomes/MGYG-HGUT-017/MGYG-HGUT-01745/genomes1/GUT_GENOME070912.gff.gz		7
GUT_GENOME071199	ERS396383_52	HGM	MAG	2628190	151	29248	44.46	96.98	0.37		0	0	0	16		GUT_GENOME001379	MGYG-HGUT-00231	Coprococcus eutactus_A	ERS396383	ERP004605	Denmark	Europe	ftp://ftp.ebi.ac.uk/pub/databases/metagenomics/mgnify_genomes/human-gut/v1.0/all_genomes/MGYG-HGUT-002/MGYG-HGUT-00231/genomes2/GUT_GENOME071199.gff.gz		2
GUT_GENOME072453	ERS396433_2	HGM	MAG	2741825	31	115414	44.19	99.33	0		0	0	6.56	18		GUT_GENOME001379	MGYG-HGUT-00231	Coprococcus eutactus_A	ERS396433	ERP004605	Spain	Europe	ftp://ftp.ebi.ac.uk/pub/databases/metagenomics/mgnify_genomes/human-gut/v1.0/all_genomes/MGYG-HGUT-002/MGYG-HGUT-00231/genomes3/GUT_GENOME072453.gff.gz		2
GUT_GENOME073732	ERS396484_57	HGM	MAG	2762945	31	162264	44.18	98.66	0		0	0	0	18		GUT_GENOME001379	MGYG-HGUT-00231	Coprococcus eutactus_A	ERS396484	ERP004605	Spain	Europe	ftp://ftp.ebi.ac.uk/pub/databases/metagenomics/mgnify_genomes/human-gut/v1.0/all_genomes/MGYG-HGUT-002/MGYG-HGUT-00231/genomes1/GUT_GENOME073732.gff.gz		2
GUT_GENOME073973	ERS396492_68	HGM	MAG	2788298	39	131654	44.2	99.33	0.18		0	0	0	18		GUT_GENOME001379	MGYG-HGUT-00231	Coprococcus eutactus_A	ERS396492	ERP004605	Spain	Europe	ftp://ftp.ebi.ac.uk/pub/databases/metagenomics/mgnify_genomes/human-gut/v1.0/all_genomes/MGYG-HGUT-002/MGYG-HGUT-00231/genomes1/GUT_GENOME073973.gff.gz		2
GUT_GENOME074158	ERS396497_98	HGM	MAG	2801924	27	133580	44.13	99.33	0		0	0	0	17		GUT_GENOME001379	MGYG-HGUT-00231	Coprococcus eutactus_A	ERS396497	ERP004605	Spain	Europe	ftp://ftp.ebi.ac.uk/pub/databases/metagenomics/mgnify_genomes/human-gut/v1.0/all_genomes/MGYG-HGUT-002/MGYG-HGUT-00231/genomes2/GUT_GENOME074158.gff.gz		2
GUT_GENOME074442	ERS396506_23	HGM	MAG	2758255	77	195313	41.01	96.64	0		0	0	0	18		GUT_GENOME001027	MGYG-HGUT-00189	Coprococcus sp900066115	ERS396506	ERP004605	Spain	Europe	ftp://ftp.ebi.ac.uk/pub/databases/metagenomics/mgnify_genomes/human-gut/v1.0/all_genomes/MGYG-HGUT-001/MGYG-HGUT-00189/genomes1/GUT_GENOME074442.gff.gz		4
GUT_GENOME074494	ERS396507_24	HGM	MAG	2656383	58	103066	41.57	95.3	0.67		0	0	0	18		GUT_GENOME001027	MGYG-HGUT-00189	Coprococcus sp900066115	ERS396507	ERP004605	Spain	Europe	ftp://ftp.ebi.ac.uk/pub/databases/metagenomics/mgnify_genomes/human-gut/v1.0/all_genomes/MGYG-HGUT-001/MGYG-HGUT-00189/genomes1/GUT_GENOME074494.gff.gz		4
GUT_GENOME074912	ERS396519_77	HGM	MAG	2638906	24	154018	44.4	99.33	0		0	0	0	18		GUT_GENOME001379	MGYG-HGUT-00231	Coprococcus eutactus_A	ERS396519	ERP004605	Spain	Europe	ftp://ftp.ebi.ac.uk/pub/databases/metagenomics/mgnify_genomes/human-gut/v1.0/all_genomes/MGYG-HGUT-002/MGYG-HGUT-00231/genomes1/GUT_GENOME074912.gff.gz		2
GUT_GENOME075207	ERS396529_29	HGM	MAG	2682407	54	70745	44.25	95.97	0		0	0	0	16		GUT_GENOME001379	MGYG-HGUT-00231	Coprococcus eutactus_A	ERS396529	ERP004605	Spain	Europe	ftp://ftp.ebi.ac.uk/pub/databases/metagenomics/mgnify_genomes/human-gut/v1.0/all_genomes/MGYG-HGUT-002/MGYG-HGUT-00231/genomes3/GUT_GENOME075207.gff.gz		2
GUT_GENOME075245	ERS396530_49	HGM	MAG	2625498	148	43232	42.8	96.26	0		0	0	0	18		GUT_GENOME095993	MGYG-HGUT-01315	Coprococcus comes	ERS396530	ERP004605	Spain	Europe	ftp://ftp.ebi.ac.uk/pub/databases/metagenomics/mgnify_genomes/human-gut/v1.0/all_genomes/MGYG-HGUT-013/MGYG-HGUT-01315/genomes1/GUT_GENOME075245.gff.gz		3
GUT_GENOME075751	ERS473041_9	HGM	MAG	2734852	33	134916	44.26	99.33	0		0	0	10.84	17		GUT_GENOME001379	MGYG-HGUT-00231	Coprococcus eutactus_A	ERS473041	ERP005989	Sweden	Europe	ftp://ftp.ebi.ac.uk/pub/databases/metagenomics/mgnify_genomes/human-gut/v1.0/all_genomes/MGYG-HGUT-002/MGYG-HGUT-00231/genomes3/GUT_GENOME075751.gff.gz		2
GUT_GENOME075867	ERS473051_33	HGM	MAG	2787489	40	120623	44.14	97.99	0		0	0	10.8	17		GUT_GENOME001379	MGYG-HGUT-00231	Coprococcus eutactus_A	ERS473051	ERP005989	Sweden	Europe	ftp://ftp.ebi.ac.uk/pub/databases/metagenomics/mgnify_genomes/human-gut/v1.0/all_genomes/MGYG-HGUT-002/MGYG-HGUT-00231/genomes2/GUT_GENOME075867.gff.gz		2
GUT_GENOME076164	ERS473072_69	HGM	MAG	2709498	42	104157	44.24	99.33	0		0	0	0	17		GUT_GENOME001379	MGYG-HGUT-00231	Coprococcus eutactus_A	ERS473072	ERP005989	Sweden	Europe	ftp://ftp.ebi.ac.uk/pub/databases/metagenomics/mgnify_genomes/human-gut/v1.0/all_genomes/MGYG-HGUT-002/MGYG-HGUT-00231/genomes1/GUT_GENOME076164.gff.gz		2
GUT_GENOME077038	ERS473144_52	HGM	MAG	2740061	38	106476	44.12	98.66	0		0	0	0	18		GUT_GENOME001379	MGYG-HGUT-00231	Coprococcus eutactus_A	ERS473144	ERP005989	Sweden	Europe	ftp://ftp.ebi.ac.uk/pub/databases/metagenomics/mgnify_genomes/human-gut/v1.0/all_genomes/MGYG-HGUT-002/MGYG-HGUT-00231/genomes3/GUT_GENOME077038.gff.gz		2
GUT_GENOME077627	ERS473194_29	HGM	MAG	2685025	109	36519	44.33	97.99	0		0	22.31	0	17		GUT_GENOME001379	MGYG-HGUT-00231	Coprococcus eutactus_A	ERS473194	ERP005989	Sweden	Europe	ftp://ftp.ebi.ac.uk/pub/databases/metagenomics/mgnify_genomes/human-gut/v1.0/all_genomes/MGYG-HGUT-002/MGYG-HGUT-00231/genomes2/GUT_GENOME077627.gff.gz		2
GUT_GENOME078254	ERS473239_33	HGM	MAG	2780717	118	39399	44.36	95.3	0.13		0	0	0	16		GUT_GENOME001379	MGYG-HGUT-00231	Coprococcus eutactus_A	ERS473239	ERP005989	Sweden	Europe	ftp://ftp.ebi.ac.uk/pub/databases/metagenomics/mgnify_genomes/human-gut/v1.0/all_genomes/MGYG-HGUT-002/MGYG-HGUT-00231/genomes2/GUT_GENOME078254.gff.gz		2
GUT_GENOME078454	ERS473254_20	HGM	MAG	2582058	57	119912	41.29	95.97	0		0	0	0	17		GUT_GENOME001027	MGYG-HGUT-00189	Coprococcus sp900066115	ERS473254	ERP005989	Sweden	Europe	ftp://ftp.ebi.ac.uk/pub/databases/metagenomics/mgnify_genomes/human-gut/v1.0/all_genomes/MGYG-HGUT-001/MGYG-HGUT-00189/genomes1/GUT_GENOME078454.gff.gz		4
GUT_GENOME079410	ERS473334_40	HGM	MAG	2548881	52	98131	41.16	97.32	0		0	0	0	17		GUT_GENOME103847	MGYG-HGUT-01707	Coprococcus sp000154245	ERS473334	ERP005989	Sweden	Europe	ftp://ftp.ebi.ac.uk/pub/databases/metagenomics/mgnify_genomes/human-gut/v1.0/all_genomes/MGYG-HGUT-017/MGYG-HGUT-01707/genomes1/GUT_GENOME079410.gff.gz		5
GUT_GENOME080383	ERS473410_21	HGM	MAG	2628565	76	65577	41.12	99.33	0.67		0	0	8.27	16		GUT_GENOME103847	MGYG-HGUT-01707	Coprococcus sp000154245	ERS473410	ERP005989	Denmark	Europe	ftp://ftp.ebi.ac.uk/pub/databases/metagenomics/mgnify_genomes/human-gut/v1.0/all_genomes/MGYG-HGUT-017/MGYG-HGUT-01707/genomes1/GUT_GENOME080383.gff.gz		5
GUT_GENOME080904	ERS537192_10	HGM	MAG	3104142	79	156865	43.51	99.33	0		0	0	0	18		GUT_GENOME001379	MGYG-HGUT-00231	Coprococcus eutactus_A	ERS537192	ERP006678	China	Asia	ftp://ftp.ebi.ac.uk/pub/databases/metagenomics/mgnify_genomes/human-gut/v1.0/all_genomes/MGYG-HGUT-002/MGYG-HGUT-00231/genomes2/GUT_GENOME080904.gff.gz		2
GUT_GENOME081006	ERS537196_41	HGM	MAG	2914110	27	112609	42.92	99.33	0		0	0	5.03	18		GUT_GENOME000055	MGYG-HGUT-00018	Coprococcus eutactus	ERS537196	ERP006678	China	Asia	ftp://ftp.ebi.ac.uk/pub/databases/metagenomics/mgnify_genomes/human-gut/v1.0/all_genomes/MGYG-HGUT-000/MGYG-HGUT-00018/genomes1/GUT_GENOME081006.gff.gz		1
GUT_GENOME081040	ERS537197_2	HGM	MAG	2821026	20	194556	44.05	99.33	0		0	0	5.44	18		GUT_GENOME001379	MGYG-HGUT-00231	Coprococcus eutactus_A	ERS537197	ERP006678	China	Asia	ftp://ftp.ebi.ac.uk/pub/databases/metagenomics/mgnify_genomes/human-gut/v1.0/all_genomes/MGYG-HGUT-002/MGYG-HGUT-00231/genomes1/GUT_GENOME081040.gff.gz		2
GUT_GENOME081081	ERS537198_7	HGM	MAG	2857746	27	171053	43.98	99.33	0		0	0	0	18		GUT_GENOME001379	MGYG-HGUT-00231	Coprococcus eutactus_A	ERS537198	ERP006678	China	Asia	ftp://ftp.ebi.ac.uk/pub/databases/metagenomics/mgnify_genomes/human-gut/v1.0/all_genomes/MGYG-HGUT-002/MGYG-HGUT-00231/genomes1/GUT_GENOME081081.gff.gz		2
GUT_GENOME081143	ERS537201_39	HGM	MAG	2682508	41	157937	44.18	98.66	0		0	0	5.03	19		GUT_GENOME001379	MGYG-HGUT-00231	Coprococcus eutactus_A	ERS537201	ERP006678	China	Asia	ftp://ftp.ebi.ac.uk/pub/databases/metagenomics/mgnify_genomes/human-gut/v1.0/all_genomes/MGYG-HGUT-002/MGYG-HGUT-00231/genomes3/GUT_GENOME081143.gff.gz		2
GUT_GENOME081229	ERS537204_9	HGM	MAG	2593091	66	136759	41.35	95.97	0		0	0	0	16		GUT_GENOME001027	MGYG-HGUT-00189	Coprococcus sp900066115	ERS537204	ERP006678	China	Asia	ftp://ftp.ebi.ac.uk/pub/databases/metagenomics/mgnify_genomes/human-gut/v1.0/all_genomes/MGYG-HGUT-001/MGYG-HGUT-00189/genomes1/GUT_GENOME081229.gff.gz		4
GUT_GENOME081436	ERS537213_3	HGM	MAG	2623818	39	105932	44.3	97.32	0.34		0	0	0	14		GUT_GENOME001379	MGYG-HGUT-00231	Coprococcus eutactus_A	ERS537213	ERP006678	China	Asia	ftp://ftp.ebi.ac.uk/pub/databases/metagenomics/mgnify_genomes/human-gut/v1.0/all_genomes/MGYG-HGUT-002/MGYG-HGUT-00231/genomes1/GUT_GENOME081436.gff.gz		2
GUT_GENOME081610	ERS537219_9	HGM	MAG	2761234	29	141258	44.14	99.33	0		0	0	0	18		GUT_GENOME001379	MGYG-HGUT-00231	Coprococcus eutactus_A	ERS537219	ERP006678	China	Asia	ftp://ftp.ebi.ac.uk/pub/databases/metagenomics/mgnify_genomes/human-gut/v1.0/all_genomes/MGYG-HGUT-002/MGYG-HGUT-00231/genomes2/GUT_GENOME081610.gff.gz		2
GUT_GENOME082082	ERS537236_53	HGM	MAG	2874102	39	131859	44.08	99.33	0		0	0	0	18		GUT_GENOME001379	MGYG-HGUT-00231	Coprococcus eutactus_A	ERS537236	ERP006678	China	Asia	ftp://ftp.ebi.ac.uk/pub/databases/metagenomics/mgnify_genomes/human-gut/v1.0/all_genomes/MGYG-HGUT-002/MGYG-HGUT-00231/genomes2/GUT_GENOME082082.gff.gz		2
GUT_GENOME082421	ERS537249_3	HGM	MAG	2581265	82	46765	44.33	95.3	0		0	0	5.03	17		GUT_GENOME001379	MGYG-HGUT-00231	Coprococcus eutactus_A	ERS537249	ERP006678	China	Asia	ftp://ftp.ebi.ac.uk/pub/databases/metagenomics/mgnify_genomes/human-gut/v1.0/all_genomes/MGYG-HGUT-002/MGYG-HGUT-00231/genomes3/GUT_GENOME082421.gff.gz		2
GUT_GENOME082433	ERS537250_11	HGM	MAG	2741493	37	144505	44.3	99.33	0		0	0	0	18		GUT_GENOME001379	MGYG-HGUT-00231	Coprococcus eutactus_A	ERS537250	ERP006678	China	Asia	ftp://ftp.ebi.ac.uk/pub/databases/metagenomics/mgnify_genomes/human-gut/v1.0/all_genomes/MGYG-HGUT-002/MGYG-HGUT-00231/genomes2/GUT_GENOME082433.gff.gz		2
GUT_GENOME082506	ERS537252_5	HGM	MAG	2686970	48	147491	41.3	95.3	0.67		0	0	0	17		GUT_GENOME001027	MGYG-HGUT-00189	Coprococcus sp900066115	ERS537252	ERP006678	China	Asia	ftp://ftp.ebi.ac.uk/pub/databases/metagenomics/mgnify_genomes/human-gut/v1.0/all_genomes/MGYG-HGUT-001/MGYG-HGUT-00189/genomes1/GUT_GENOME082506.gff.gz		4
GUT_GENOME082676	ERS537258_62	HGM	MAG	2778411	23	241988	43.08	96.64	0		0	0	5.03	18		GUT_GENOME000055	MGYG-HGUT-00018	Coprococcus eutactus	ERS537258	ERP006678	China	Asia	ftp://ftp.ebi.ac.uk/pub/databases/metagenomics/mgnify_genomes/human-gut/v1.0/all_genomes/MGYG-HGUT-000/MGYG-HGUT-00018/genomes1/GUT_GENOME082676.gff.gz		1
GUT_GENOME082782	ERS537262_66	HGM	MAG	2593063	40	97543	44.47	98.66	0.67		0	0	0	16		GUT_GENOME001379	MGYG-HGUT-00231	Coprococcus eutactus_A	ERS537262	ERP006678	China	Asia	ftp://ftp.ebi.ac.uk/pub/databases/metagenomics/mgnify_genomes/human-gut/v1.0/all_genomes/MGYG-HGUT-002/MGYG-HGUT-00231/genomes2/GUT_GENOME082782.gff.gz		2
GUT_GENOME082868	ERS537266_27	HGM	MAG	2606058	78	49819	44.38	97.32	0.34		0	0	0	14		GUT_GENOME001379	MGYG-HGUT-00231	Coprococcus eutactus_A	ERS537266	ERP006678	China	Asia	ftp://ftp.ebi.ac.uk/pub/databases/metagenomics/mgnify_genomes/human-gut/v1.0/all_genomes/MGYG-HGUT-002/MGYG-HGUT-00231/genomes1/GUT_GENOME082868.gff.gz		2
GUT_GENOME082976	ERS537269_86	HGM	MAG	2750156	27	176293	44.25	99.33	0		0	0	6.94	18		GUT_GENOME001379	MGYG-HGUT-00231	Coprococcus eutactus_A	ERS537269	ERP006678	China	Asia	ftp://ftp.ebi.ac.uk/pub/databases/metagenomics/mgnify_genomes/human-gut/v1.0/all_genomes/MGYG-HGUT-002/MGYG-HGUT-00231/genomes3/GUT_GENOME082976.gff.gz		2
GUT_GENOME083014	ERS537272_10	HGM	MAG	2743419	32	247214	44.23	99.33	0		0	0	10.84	19		GUT_GENOME001379	MGYG-HGUT-00231	Coprococcus eutactus_A	ERS537272	ERP006678	China	Asia	ftp://ftp.ebi.ac.uk/pub/databases/metagenomics/mgnify_genomes/human-gut/v1.0/all_genomes/MGYG-HGUT-002/MGYG-HGUT-00231/genomes3/GUT_GENOME083014.gff.gz		2
GUT_GENOME083068	ERS537273_3	HGM	MAG	2175751	74	48287	42.16	97.32	0.89		0	0	0	16		GUT_GENOME140272	MGYG-HGUT-02289	Coprococcus sp000433075	ERS537273	ERP006678	China	Asia	ftp://ftp.ebi.ac.uk/pub/databases/metagenomics/mgnify_genomes/human-gut/v1.0/all_genomes/MGYG-HGUT-022/MGYG-HGUT-02289/genomes1/GUT_GENOME083068.gff.gz		8
GUT_GENOME083198	ERS537277_53	HGM	MAG	2801438	28	224917	44.14	99.33	0		0	0	10.74	18		GUT_GENOME001379	MGYG-HGUT-00231	Coprococcus eutactus_A	ERS537277	ERP006678	China	Asia	ftp://ftp.ebi.ac.uk/pub/databases/metagenomics/mgnify_genomes/human-gut/v1.0/all_genomes/MGYG-HGUT-002/MGYG-HGUT-00231/genomes1/GUT_GENOME083198.gff.gz		2
GUT_GENOME083316	ERS537281_54	HGM	MAG	2861498	43	184059	44.11	99.33	0		0	0	5.03	18		GUT_GENOME001379	MGYG-HGUT-00231	Coprococcus eutactus_A	ERS537281	ERP006678	China	Asia	ftp://ftp.ebi.ac.uk/pub/databases/metagenomics/mgnify_genomes/human-gut/v1.0/all_genomes/MGYG-HGUT-002/MGYG-HGUT-00231/genomes2/GUT_GENOME083316.gff.gz		2
GUT_GENOME083535	ERS537289_49	HGM	MAG	2709923	61	95545	44.17	95.3	0		0	10.05	10.8	18		GUT_GENOME001379	MGYG-HGUT-00231	Coprococcus eutactus_A	ERS537289	ERP006678	China	Asia	ftp://ftp.ebi.ac.uk/pub/databases/metagenomics/mgnify_genomes/human-gut/v1.0/all_genomes/MGYG-HGUT-002/MGYG-HGUT-00231/genomes1/GUT_GENOME083535.gff.gz		2
GUT_GENOME083729	ERS537296_106	HGM	MAG	2544827	36	147013	44.3	99.33	0		0	0	10.77	17		GUT_GENOME001379	MGYG-HGUT-00231	Coprococcus eutactus_A	ERS537296	ERP006678	China	Asia	ftp://ftp.ebi.ac.uk/pub/databases/metagenomics/mgnify_genomes/human-gut/v1.0/all_genomes/MGYG-HGUT-002/MGYG-HGUT-00231/genomes1/GUT_GENOME083729.gff.gz		2
GUT_GENOME083860	ERS537300_4	HGM	MAG	2751860	27	152907	44.28	99.33	0		0	0	4.92	18		GUT_GENOME001379	MGYG-HGUT-00231	Coprococcus eutactus_A	ERS537300	ERP006678	China	Asia	ftp://ftp.ebi.ac.uk/pub/databases/metagenomics/mgnify_genomes/human-gut/v1.0/all_genomes/MGYG-HGUT-002/MGYG-HGUT-00231/genomes1/GUT_GENOME083860.gff.gz		2
GUT_GENOME083897	ERS537301_53	HGM	MAG	2781326	36	116030	44.17	98.66	0		0	0	0	18		GUT_GENOME001379	MGYG-HGUT-00231	Coprococcus eutactus_A	ERS537301	ERP006678	China	Asia	ftp://ftp.ebi.ac.uk/pub/databases/metagenomics/mgnify_genomes/human-gut/v1.0/all_genomes/MGYG-HGUT-002/MGYG-HGUT-00231/genomes1/GUT_GENOME083897.gff.gz		2
GUT_GENOME083973	ERS537304_125	HGM	MAG	2568536	38	131135	44.29	99.33	0		0	0	4.92	18		GUT_GENOME001379	MGYG-HGUT-00231	Coprococcus eutactus_A	ERS537304	ERP006678	China	Asia	ftp://ftp.ebi.ac.uk/pub/databases/metagenomics/mgnify_genomes/human-gut/v1.0/all_genomes/MGYG-HGUT-002/MGYG-HGUT-00231/genomes3/GUT_GENOME083973.gff.gz		2
GUT_GENOME084013	ERS537305_24	HGM	MAG	2828642	155	43294	42.77	96.49	0.78		0	0	0	19		GUT_GENOME095993	MGYG-HGUT-01315	Coprococcus comes	ERS537305	ERP006678	China	Asia	ftp://ftp.ebi.ac.uk/pub/databases/metagenomics/mgnify_genomes/human-gut/v1.0/all_genomes/MGYG-HGUT-013/MGYG-HGUT-01315/genomes1/GUT_GENOME084013.gff.gz		3
GUT_GENOME084122	ERS537309_34	HGM	MAG	2592760	28	184398	44.24	97.99	0		0	0	10.77	18		GUT_GENOME001379	MGYG-HGUT-00231	Coprococcus eutactus_A	ERS537309	ERP006678	China	Asia	ftp://ftp.ebi.ac.uk/pub/databases/metagenomics/mgnify_genomes/human-gut/v1.0/all_genomes/MGYG-HGUT-002/MGYG-HGUT-00231/genomes4/GUT_GENOME084122.gff.gz		2
GUT_GENOME084195	ERS537311_91	HGM	MAG	2671441	28	156062	44.15	99.33	0		0	25.38	10.84	18		GUT_GENOME001379	MGYG-HGUT-00231	Coprococcus eutactus_A	ERS537311	ERP006678	China	Asia	ftp://ftp.ebi.ac.uk/pub/databases/metagenomics/mgnify_genomes/human-gut/v1.0/all_genomes/MGYG-HGUT-002/MGYG-HGUT-00231/genomes1/GUT_GENOME084195.gff.gz		2
GUT_GENOME084247	ERS537313_80	HGM	MAG	2221521	29	102409	41.96	95.97	0		0	23.48	10.77	15		GUT_GENOME140272	MGYG-HGUT-02289	Coprococcus sp000433075	ERS537313	ERP006678	China	Asia	ftp://ftp.ebi.ac.uk/pub/databases/metagenomics/mgnify_genomes/human-gut/v1.0/all_genomes/MGYG-HGUT-022/MGYG-HGUT-02289/genomes1/GUT_GENOME084247.gff.gz		8
GUT_GENOME084828	ERS537334_2	HGM	MAG	2752710	44	123289	41.34	97.32	0.67		0	0	0	18		GUT_GENOME001027	MGYG-HGUT-00189	Coprococcus sp900066115	ERS537334	ERP006678	China	Asia	ftp://ftp.ebi.ac.uk/pub/databases/metagenomics/mgnify_genomes/human-gut/v1.0/all_genomes/MGYG-HGUT-001/MGYG-HGUT-00189/genomes1/GUT_GENOME084828.gff.gz		4
GUT_GENOME084953	ERS537338_43	HGM	MAG	2695058	83	152824	41.33	96.64	0		0	0	0	19		GUT_GENOME001027	MGYG-HGUT-00189	Coprococcus sp900066115	ERS537338	ERP006678	China	Asia	ftp://ftp.ebi.ac.uk/pub/databases/metagenomics/mgnify_genomes/human-gut/v1.0/all_genomes/MGYG-HGUT-001/MGYG-HGUT-00189/genomes1/GUT_GENOME084953.gff.gz		4
GUT_GENOME085081	ERS537342_60	HGM	MAG	2836006	42	161968	44.16	99.33	0		0	0	12.17	18		GUT_GENOME001379	MGYG-HGUT-00231	Coprococcus eutactus_A	ERS537342	ERP006678	China	Asia	ftp://ftp.ebi.ac.uk/pub/databases/metagenomics/mgnify_genomes/human-gut/v1.0/all_genomes/MGYG-HGUT-002/MGYG-HGUT-00231/genomes1/GUT_GENOME085081.gff.gz		2
GUT_GENOME085139	ERS537345_26	HGM	MAG	2336048	40	110401	41.94	97.32	0		0	0	0	15		GUT_GENOME140272	MGYG-HGUT-02289	Coprococcus sp000433075	ERS537345	ERP006678	China	Asia	ftp://ftp.ebi.ac.uk/pub/databases/metagenomics/mgnify_genomes/human-gut/v1.0/all_genomes/MGYG-HGUT-022/MGYG-HGUT-02289/genomes1/GUT_GENOME085139.gff.gz		8
GUT_GENOME085214	ERS537347_56	HGM	MAG	3044358	42	193376	43.91	99.33	0		0	0	0	18		GUT_GENOME001379	MGYG-HGUT-00231	Coprococcus eutactus_A	ERS537347	ERP006678	China	Asia	ftp://ftp.ebi.ac.uk/pub/databases/metagenomics/mgnify_genomes/human-gut/v1.0/all_genomes/MGYG-HGUT-002/MGYG-HGUT-00231/genomes1/GUT_GENOME085214.gff.gz		2
GUT_GENOME085267	ERS537349_17	HGM	MAG	2824721	41	154292	42.99	98.66	0.67		0	0	0	18		GUT_GENOME000055	MGYG-HGUT-00018	Coprococcus eutactus	ERS537349	ERP006678	China	Asia	ftp://ftp.ebi.ac.uk/pub/databases/metagenomics/mgnify_genomes/human-gut/v1.0/all_genomes/MGYG-HGUT-000/MGYG-HGUT-00018/genomes1/GUT_GENOME085267.gff.gz		1
GUT_GENOME085556	ERS537359_31	HGM	MAG	2909967	26	176048	43.74	99.33	0.31		0	0	4.92	16		GUT_GENOME001379	MGYG-HGUT-00231	Coprococcus eutactus_A	ERS537359	ERP006678	China	Asia	ftp://ftp.ebi.ac.uk/pub/databases/metagenomics/mgnify_genomes/human-gut/v1.0/all_genomes/MGYG-HGUT-002/MGYG-HGUT-00231/genomes1/GUT_GENOME085556.gff.gz		2
GUT_GENOME085591	ERS537360_23	HGM	MAG	2890738	42	156763	43.99	99.33	0		0	0	10.84	18		GUT_GENOME001379	MGYG-HGUT-00231	Coprococcus eutactus_A	ERS537360	ERP006678	China	Asia	ftp://ftp.ebi.ac.uk/pub/databases/metagenomics/mgnify_genomes/human-gut/v1.0/all_genomes/MGYG-HGUT-002/MGYG-HGUT-00231/genomes1/GUT_GENOME085591.gff.gz		2
GUT_GENOME085663	ERS537362_45	HGM	MAG	2756947	91	41925	44.2	99.11	0.67		0	0	0	16		GUT_GENOME001379	MGYG-HGUT-00231	Coprococcus eutactus_A	ERS537362	ERP006678	China	Asia	ftp://ftp.ebi.ac.uk/pub/databases/metagenomics/mgnify_genomes/human-gut/v1.0/all_genomes/MGYG-HGUT-002/MGYG-HGUT-00231/genomes3/GUT_GENOME085663.gff.gz		2
GUT_GENOME085740	ERS537365_45	HGM	MAG	2832010	27	131667	44.12	99.33	0		0	0	0	17		GUT_GENOME001379	MGYG-HGUT-00231	Coprococcus eutactus_A	ERS537365	ERP006678	China	Asia	ftp://ftp.ebi.ac.uk/pub/databases/metagenomics/mgnify_genomes/human-gut/v1.0/all_genomes/MGYG-HGUT-002/MGYG-HGUT-00231/genomes1/GUT_GENOME085740.gff.gz		2
GUT_GENOME085781	ERS537366_56	HGM	MAG	2743352	48	91872	44.45	99.33	0.67		0	0	0	17		GUT_GENOME001379	MGYG-HGUT-00231	Coprococcus eutactus_A	ERS537366	ERP006678	China	Asia	ftp://ftp.ebi.ac.uk/pub/databases/metagenomics/mgnify_genomes/human-gut/v1.0/all_genomes/MGYG-HGUT-002/MGYG-HGUT-00231/genomes2/GUT_GENOME085781.gff.gz		2
GUT_GENOME085976	ERS537373_18	HGM	MAG	2844032	31	213306	44.17	99.33	0		0	25.77	5.44	19		GUT_GENOME001379	MGYG-HGUT-00231	Coprococcus eutactus_A	ERS537373	ERP006678	China	Asia	ftp://ftp.ebi.ac.uk/pub/databases/metagenomics/mgnify_genomes/human-gut/v1.0/all_genomes/MGYG-HGUT-002/MGYG-HGUT-00231/genomes1/GUT_GENOME085976.gff.gz		2
GUT_GENOME086034	ERS537374_87	HGM	MAG	2561977	26	140550	44.26	95.3	0		0	22.31	5.44	16		GUT_GENOME001379	MGYG-HGUT-00231	Coprococcus eutactus_A	ERS537374	ERP006678	China	Asia	ftp://ftp.ebi.ac.uk/pub/databases/metagenomics/mgnify_genomes/human-gut/v1.0/all_genomes/MGYG-HGUT-002/MGYG-HGUT-00231/genomes1/GUT_GENOME086034.gff.gz		2
GUT_GENOME086164	ERS537379_68	HGM	MAG	2614631	49	87261	44.25	97.32	0.22		0	0	8	15		GUT_GENOME001379	MGYG-HGUT-00231	Coprococcus eutactus_A	ERS537379	ERP006678	China	Asia	ftp://ftp.ebi.ac.uk/pub/databases/metagenomics/mgnify_genomes/human-gut/v1.0/all_genomes/MGYG-HGUT-002/MGYG-HGUT-00231/genomes3/GUT_GENOME086164.gff.gz		2
GUT_GENOME086192	ERS537381_18	HGM	MAG	2645907	57	68703	44.25	95.97	0		0	0	10.56	17		GUT_GENOME001379	MGYG-HGUT-00231	Coprococcus eutactus_A	ERS537381	ERP006678	China	Asia	ftp://ftp.ebi.ac.uk/pub/databases/metagenomics/mgnify_genomes/human-gut/v1.0/all_genomes/MGYG-HGUT-002/MGYG-HGUT-00231/genomes2/GUT_GENOME086192.gff.gz		2
GUT_GENOME086359	ERS537387_5	HGM	MAG	2669605	28	173270	43.16	95.97	0		0	0	0	17		GUT_GENOME000055	MGYG-HGUT-00018	Coprococcus eutactus	ERS537387	ERP006678	China	Asia	ftp://ftp.ebi.ac.uk/pub/databases/metagenomics/mgnify_genomes/human-gut/v1.0/all_genomes/MGYG-HGUT-000/MGYG-HGUT-00018/genomes1/GUT_GENOME086359.gff.gz		1
GUT_GENOME086457	ERS537390_49	HGM	MAG	2514977	55	136359	41.4	96.64	0		0	0	10.84	18		GUT_GENOME001027	MGYG-HGUT-00189	Coprococcus sp900066115	ERS537390	ERP006678	China	Asia	ftp://ftp.ebi.ac.uk/pub/databases/metagenomics/mgnify_genomes/human-gut/v1.0/all_genomes/MGYG-HGUT-001/MGYG-HGUT-00189/genomes1/GUT_GENOME086457.gff.gz		4
GUT_GENOME086511	ERS537393_18	HGM	MAG	2868134	30	227856	42.81	97.99	0		0	0	5.03	17		GUT_GENOME000055	MGYG-HGUT-00018	Coprococcus eutactus	ERS537393	ERP006678	China	Asia	ftp://ftp.ebi.ac.uk/pub/databases/metagenomics/mgnify_genomes/human-gut/v1.0/all_genomes/MGYG-HGUT-000/MGYG-HGUT-00018/genomes1/GUT_GENOME086511.gff.gz		1
GUT_GENOME086547	ERS537394_38	HGM	MAG	2772860	37	285250	44.24	99.33	0		0	0	12.72	19		GUT_GENOME001379	MGYG-HGUT-00231	Coprococcus eutactus_A	ERS537394	ERP006678	China	Asia	ftp://ftp.ebi.ac.uk/pub/databases/metagenomics/mgnify_genomes/human-gut/v1.0/all_genomes/MGYG-HGUT-002/MGYG-HGUT-00231/genomes3/GUT_GENOME086547.gff.gz		2
GUT_GENOME086607	ERS537396_71	HGM	MAG	2841227	22	201034	44.02	99.33	0		0	0	10.84	17		GUT_GENOME001379	MGYG-HGUT-00231	Coprococcus eutactus_A	ERS537396	ERP006678	China	Asia	ftp://ftp.ebi.ac.uk/pub/databases/metagenomics/mgnify_genomes/human-gut/v1.0/all_genomes/MGYG-HGUT-002/MGYG-HGUT-00231/genomes2/GUT_GENOME086607.gff.gz		2
GUT_GENOME086665	ERS537398_51	HGM	MAG	2313754	92	47926	44.47	96.64	0.02		0	0	0	16		GUT_GENOME001379	MGYG-HGUT-00231	Coprococcus eutactus_A	ERS537398	ERP006678	China	Asia	ftp://ftp.ebi.ac.uk/pub/databases/metagenomics/mgnify_genomes/human-gut/v1.0/all_genomes/MGYG-HGUT-002/MGYG-HGUT-00231/genomes3/GUT_GENOME086665.gff.gz		2
GUT_GENOME086676	ERS537399_21	HGM	MAG	2294271	34	92662	41.95	97.32	0		0	0	0	17		GUT_GENOME140272	MGYG-HGUT-02289	Coprococcus sp000433075	ERS537399	ERP006678	China	Asia	ftp://ftp.ebi.ac.uk/pub/databases/metagenomics/mgnify_genomes/human-gut/v1.0/all_genomes/MGYG-HGUT-022/MGYG-HGUT-02289/genomes1/GUT_GENOME086676.gff.gz		8
GUT_GENOME087360	ERS608492_52	HGM	MAG	2683431	59	68274	44.37	99.31	0		0	9.92	12.07	17		GUT_GENOME001379	MGYG-HGUT-00231	Coprococcus eutactus_A	ERS608492	ERP008729	Austria	Europe	ftp://ftp.ebi.ac.uk/pub/databases/metagenomics/mgnify_genomes/human-gut/v1.0/all_genomes/MGYG-HGUT-002/MGYG-HGUT-00231/genomes1/GUT_GENOME087360.gff.gz		2
GUT_GENOME088947	ERS608557_23	HGM	MAG	2662891	91	54363	44.01	97.32	0.67		0	0	0	16		GUT_GENOME103893	MGYG-HGUT-01714	Coprococcus_A catus	ERS608557	ERP008729	Austria	Europe	ftp://ftp.ebi.ac.uk/pub/databases/metagenomics/mgnify_genomes/human-gut/v1.0/all_genomes/MGYG-HGUT-017/MGYG-HGUT-01714/genomes1/GUT_GENOME088947.gff.gz		9
GUT_GENOME089503	ERS608578_86	HGM	MAG	2706537	46	118073	43.12	95.97	0		0	0	10.22	17		GUT_GENOME000055	MGYG-HGUT-00018	Coprococcus eutactus	ERS608578	ERP008729	Austria	Europe	ftp://ftp.ebi.ac.uk/pub/databases/metagenomics/mgnify_genomes/human-gut/v1.0/all_genomes/MGYG-HGUT-000/MGYG-HGUT-00018/genomes1/GUT_GENOME089503.gff.gz		1
GUT_GENOME089551	ERS608580_77	HGM	MAG	2727922	98	88116	41.34	95.97	0		0	0	0	17		GUT_GENOME001027	MGYG-HGUT-00189	Coprococcus sp900066115	ERS608580	ERP008729	Austria	Europe	ftp://ftp.ebi.ac.uk/pub/databases/metagenomics/mgnify_genomes/human-gut/v1.0/all_genomes/MGYG-HGUT-001/MGYG-HGUT-00189/genomes1/GUT_GENOME089551.gff.gz		4
GUT_GENOME090196	ERS608603_35	HGM	MAG	2749604	38	151642	44.25	99.33	0		0	0	0	18		GUT_GENOME001379	MGYG-HGUT-00231	Coprococcus eutactus_A	ERS608603	ERP008729	Austria	Europe	ftp://ftp.ebi.ac.uk/pub/databases/metagenomics/mgnify_genomes/human-gut/v1.0/all_genomes/MGYG-HGUT-002/MGYG-HGUT-00231/genomes2/GUT_GENOME090196.gff.gz		2
GUT_GENOME090283	ERS608605_5	HGM	MAG	2882414	36	109353	43.85	97.65	0		0	0	5.81	16		GUT_GENOME001379	MGYG-HGUT-00231	Coprococcus eutactus_A	ERS608605	ERP008729	Austria	Europe	ftp://ftp.ebi.ac.uk/pub/databases/metagenomics/mgnify_genomes/human-gut/v1.0/all_genomes/MGYG-HGUT-002/MGYG-HGUT-00231/genomes3/GUT_GENOME090283.gff.gz		2
GUT_GENOME090850	ERS631833_65	HGM	MAG	2805579	42	113024	44.01	98.66	0.34		0	0	0	16		GUT_GENOME001379	MGYG-HGUT-00231	Coprococcus eutactus_A	ERS631833	ERP008729	Austria	Europe	ftp://ftp.ebi.ac.uk/pub/databases/metagenomics/mgnify_genomes/human-gut/v1.0/all_genomes/MGYG-HGUT-002/MGYG-HGUT-00231/genomes2/GUT_GENOME090850.gff.gz		2
GUT_GENOME090906	FengQ_2015__SID31004__bin.3	CIBIO	MAG	2764262	161	24115	44.3	97.96	0.02		0	0	0	14		GUT_GENOME001379	MGYG-HGUT-00231	Coprococcus eutactus_A	ERS608599	ERP008729	Austria	Europe	ftp://ftp.ebi.ac.uk/pub/databases/metagenomics/mgnify_genomes/human-gut/v1.0/all_genomes/MGYG-HGUT-002/MGYG-HGUT-00231/genomes3/GUT_GENOME090906.gff.gz		2
GUT_GENOME091211	FengQ_2015__SID31219__bin.53	CIBIO	MAG	2710605	101	41381	44.49	96.51	0.67		0	16.24	11.21	16		GUT_GENOME001379	MGYG-HGUT-00231	Coprococcus eutactus_A	ERS608485	ERP008729	Austria	Europe	ftp://ftp.ebi.ac.uk/pub/databases/metagenomics/mgnify_genomes/human-gut/v1.0/all_genomes/MGYG-HGUT-002/MGYG-HGUT-00231/genomes1/GUT_GENOME091211.gff.gz		2
GUT_GENOME091267	FengQ_2015__SID31233__bin.58	CIBIO	MAG	2647720	88	43874	43.86	95.18	0.84		0	16.11	0	11		GUT_GENOME103893	MGYG-HGUT-01714	Coprococcus_A catus	ERS608565	ERP008729	Austria	Europe	ftp://ftp.ebi.ac.uk/pub/databases/metagenomics/mgnify_genomes/human-gut/v1.0/all_genomes/MGYG-HGUT-017/MGYG-HGUT-01714/genomes1/GUT_GENOME091267.gff.gz		9
GUT_GENOME091336	FengQ_2015__SID31256__bin.34	CIBIO	MAG	2818868	99	43310	43.81	98.47	0.67		0	0	0	15		GUT_GENOME103893	MGYG-HGUT-01714	Coprococcus_A catus	ERS608544	ERP008729	Austria	Europe	ftp://ftp.ebi.ac.uk/pub/databases/metagenomics/mgnify_genomes/human-gut/v1.0/all_genomes/MGYG-HGUT-017/MGYG-HGUT-01714/genomes1/GUT_GENOME091336.gff.gz		9
GUT_GENOME091443	FengQ_2015__SID31276__bin.66	CIBIO	MAG	2703796	36	117379	44.21	98.99	0.67		0	0	0	17		GUT_GENOME001379	MGYG-HGUT-00231	Coprococcus eutactus_A	ERS608594	ERP008729	Austria	Europe	ftp://ftp.ebi.ac.uk/pub/databases/metagenomics/mgnify_genomes/human-gut/v1.0/all_genomes/MGYG-HGUT-002/MGYG-HGUT-00231/genomes2/GUT_GENOME091443.gff.gz		2
GUT_GENOME091551	FengQ_2015__SID31300__bin.54	CIBIO	MAG	2291523	47	85449	42.03	97.27	0		0	0	8.89	14		GUT_GENOME140272	MGYG-HGUT-02289	Coprococcus sp000433075	ERS608495	ERP008729	Austria	Europe	ftp://ftp.ebi.ac.uk/pub/databases/metagenomics/mgnify_genomes/human-gut/v1.0/all_genomes/MGYG-HGUT-022/MGYG-HGUT-02289/genomes1/GUT_GENOME091551.gff.gz		8
GUT_GENOME091596	FengQ_2015__SID31328__bin.61	CIBIO	MAG	2649771	18	345315	41.21	99.33	0		0	0	34.39	17		GUT_GENOME001027	MGYG-HGUT-00189	Coprococcus sp900066115	ERS608505	ERP008729	Austria	Europe	ftp://ftp.ebi.ac.uk/pub/databases/metagenomics/mgnify_genomes/human-gut/v1.0/all_genomes/MGYG-HGUT-001/MGYG-HGUT-00189/genomes1/GUT_GENOME091596.gff.gz		4
GUT_GENOME091831	FengQ_2015__SID31431__bin.11	CIBIO	MAG	3029619	31	225767	43.99	99.33	0		0	0	0	18		GUT_GENOME001379	MGYG-HGUT-00231	Coprococcus eutactus_A	ERS608564	ERP008729	Austria	Europe	ftp://ftp.ebi.ac.uk/pub/databases/metagenomics/mgnify_genomes/human-gut/v1.0/all_genomes/MGYG-HGUT-002/MGYG-HGUT-00231/genomes4/GUT_GENOME091831.gff.gz		2
GUT_GENOME091937	FengQ_2015__SID31452__bin.33	CIBIO	MAG	2941751	22	244798	43.97	99.33	0.13		0	0	0	19		GUT_GENOME001379	MGYG-HGUT-00231	Coprococcus eutactus_A	ERS608496	ERP008729	Austria	Europe	ftp://ftp.ebi.ac.uk/pub/databases/metagenomics/mgnify_genomes/human-gut/v1.0/all_genomes/MGYG-HGUT-002/MGYG-HGUT-00231/genomes1/GUT_GENOME091937.gff.gz		2
GUT_GENOME091978	FengQ_2015__SID31455__bin.52	CIBIO	MAG	2935990	23	379563	44.03	98.99	0		0	0	0	17		GUT_GENOME001379	MGYG-HGUT-00231	Coprococcus eutactus_A	ERS608540	ERP008729	Austria	Europe	ftp://ftp.ebi.ac.uk/pub/databases/metagenomics/mgnify_genomes/human-gut/v1.0/all_genomes/MGYG-HGUT-002/MGYG-HGUT-00231/genomes1/GUT_GENOME091978.gff.gz		2
GUT_GENOME091992	FengQ_2015__SID31477__bin.14	CIBIO	MAG	2968684	26	159105	43.97	99.33	0		0	52.71	0	17		GUT_GENOME001379	MGYG-HGUT-00231	Coprococcus eutactus_A	ERS608536	ERP008729	Austria	Europe	ftp://ftp.ebi.ac.uk/pub/databases/metagenomics/mgnify_genomes/human-gut/v1.0/all_genomes/MGYG-HGUT-002/MGYG-HGUT-00231/genomes3/GUT_GENOME091992.gff.gz		2
GUT_GENOME091994	FengQ_2015__SID31477__bin.1	CIBIO	MAG	2272032	144	21833	43.37	97.02	0		0	11.29	5.3	17		GUT_GENOME095993	MGYG-HGUT-01315	Coprococcus comes	ERS608536	ERP008729	Austria	Europe	ftp://ftp.ebi.ac.uk/pub/databases/metagenomics/mgnify_genomes/human-gut/v1.0/all_genomes/MGYG-HGUT-013/MGYG-HGUT-01315/genomes1/GUT_GENOME091994.gff.gz		3
GUT_GENOME092134	FengQ_2015__SID31537__bin.32	CIBIO	MAG	2582610	100	51182	42.89	97	0.62		0	0	10.6	15		GUT_GENOME095993	MGYG-HGUT-01315	Coprococcus comes	ERS608475	ERP008729	Austria	Europe	ftp://ftp.ebi.ac.uk/pub/databases/metagenomics/mgnify_genomes/human-gut/v1.0/all_genomes/MGYG-HGUT-013/MGYG-HGUT-01315/genomes1/GUT_GENOME092134.gff.gz		3
GUT_GENOME092269	FengQ_2015__SID31685__bin.7	CIBIO	MAG	2911701	30	144800	44.1	98.29	0		0	26.09	0	16		GUT_GENOME001379	MGYG-HGUT-00231	Coprococcus eutactus_A	ERS608607	ERP008729	Austria	Europe	ftp://ftp.ebi.ac.uk/pub/databases/metagenomics/mgnify_genomes/human-gut/v1.0/all_genomes/MGYG-HGUT-002/MGYG-HGUT-00231/genomes2/GUT_GENOME092269.gff.gz		2
GUT_GENOME092321	FengQ_2015__SID31714__bin.23	CIBIO	MAG	2743430	85	55290	42.7	98.8	0.29		0	0	0	17		GUT_GENOME095993	MGYG-HGUT-01315	Coprococcus comes	ERS608484	ERP008729	Austria	Europe	ftp://ftp.ebi.ac.uk/pub/databases/metagenomics/mgnify_genomes/human-gut/v1.0/all_genomes/MGYG-HGUT-013/MGYG-HGUT-01315/genomes1/GUT_GENOME092321.gff.gz		3
GUT_GENOME092410	FengQ_2015__SID31750__bin.4	CIBIO	MAG	2976667	21	229021	43.88	99.33	0		0	70.52	0	19		GUT_GENOME001379	MGYG-HGUT-00231	Coprococcus eutactus_A	ERS608509	ERP008729	Austria	Europe	ftp://ftp.ebi.ac.uk/pub/databases/metagenomics/mgnify_genomes/human-gut/v1.0/all_genomes/MGYG-HGUT-002/MGYG-HGUT-00231/genomes2/GUT_GENOME092410.gff.gz		2
GUT_GENOME092872	FengQ_2015__SID31880__bin.61	CIBIO	MAG	2935707	24	243308	43.02	97.32	0		0	52.71	0	18		GUT_GENOME000055	MGYG-HGUT-00018	Coprococcus eutactus	ERS608612	ERP008729	Austria	Europe	ftp://ftp.ebi.ac.uk/pub/databases/metagenomics/mgnify_genomes/human-gut/v1.0/all_genomes/MGYG-HGUT-000/MGYG-HGUT-00018/genomes1/GUT_GENOME092872.gff.gz		1
GUT_GENOME093156	FengQ_2015__SID530050__bin.43	CIBIO	MAG	2632735	79	67006	41.09	95.3	0.02		0	0	0	14		GUT_GENOME001027	MGYG-HGUT-00189	Coprococcus sp000154245	ERS608480	ERP008729	Austria	Europe	ftp://ftp.ebi.ac.uk/pub/databases/metagenomics/mgnify_genomes/human-gut/v1.0/all_genomes/MGYG-HGUT-001/MGYG-HGUT-00189/genomes1/GUT_GENOME093156.gff.gz		5
GUT_GENOME093220	FengQ_2015__SID530054__bin.42	CIBIO	MAG	3038837	22	247792	43.82	99.33	0		0	46.9	0	18		GUT_GENOME001379	MGYG-HGUT-00231	Coprococcus eutactus_A	ERS608549	ERP008729	Austria	Europe	ftp://ftp.ebi.ac.uk/pub/databases/metagenomics/mgnify_genomes/human-gut/v1.0/all_genomes/MGYG-HGUT-002/MGYG-HGUT-00231/genomes1/GUT_GENOME093220.gff.gz		2
GUT_GENOME093252	FengQ_2015__SID530055__bin.35	CIBIO	MAG	2595749	32	138143	41.22	98.53	0		0	0	0	18		GUT_GENOME001027	MGYG-HGUT-00189	Coprococcus sp000154245	ERS608526	ERP008729	Austria	Europe	ftp://ftp.ebi.ac.uk/pub/databases/metagenomics/mgnify_genomes/human-gut/v1.0/all_genomes/MGYG-HGUT-001/MGYG-HGUT-00189/genomes2/GUT_GENOME093252.gff.gz		5
GUT_GENOME093368	FengQ_2015__SID530142__bin.73	CIBIO	MAG	2934350	28	220262	42.88	99.33	0.34		0	0	0	16		GUT_GENOME000055	MGYG-HGUT-00018	Coprococcus eutactus	ERS608546	ERP008729	Austria	Europe	ftp://ftp.ebi.ac.uk/pub/databases/metagenomics/mgnify_genomes/human-gut/v1.0/all_genomes/MGYG-HGUT-000/MGYG-HGUT-00018/genomes1/GUT_GENOME093368.gff.gz		1
GUT_GENOME093489	FengQ_2015__SID530177__bin.24	CIBIO	MAG	2557134	21	249026	41.4	97.99	0		0	0	11.21	17		GUT_GENOME001027	MGYG-HGUT-00189	Coprococcus sp900066115	ERS608482	ERP008729	Austria	Europe	ftp://ftp.ebi.ac.uk/pub/databases/metagenomics/mgnify_genomes/human-gut/v1.0/all_genomes/MGYG-HGUT-001/MGYG-HGUT-00189/genomes1/GUT_GENOME093489.gff.gz		4
GUT_GENOME093550	FengQ_2015__SID530215__bin.23	CIBIO	MAG	2945751	23	204578	43.98	99.33	0		0	9.39	0	19		GUT_GENOME001379	MGYG-HGUT-00231	Coprococcus eutactus_A	ERS608517	ERP008729	Austria	Europe	ftp://ftp.ebi.ac.uk/pub/databases/metagenomics/mgnify_genomes/human-gut/v1.0/all_genomes/MGYG-HGUT-002/MGYG-HGUT-00231/genomes2/GUT_GENOME093550.gff.gz		2
GUT_GENOME093880	FengQ_2015__SID530373__bin.19	CIBIO	MAG	2641284	22	245233	41.3	99.33	0		0	0	0	18		GUT_GENOME001027	MGYG-HGUT-00189	Coprococcus sp900066115	ERS608583	ERP008729	Austria	Europe	ftp://ftp.ebi.ac.uk/pub/databases/metagenomics/mgnify_genomes/human-gut/v1.0/all_genomes/MGYG-HGUT-001/MGYG-HGUT-00189/genomes1/GUT_GENOME093880.gff.gz		4
GUT_GENOME094176	FengQ_2015__SID530600__bin.57	CIBIO	MAG	2664443	44	118911	41.11	98.66	0		0	46.25	0	19		GUT_GENOME001027	MGYG-HGUT-00189	Coprococcus sp000154245	ERS608535	ERP008729	Austria	Europe	ftp://ftp.ebi.ac.uk/pub/databases/metagenomics/mgnify_genomes/human-gut/v1.0/all_genomes/MGYG-HGUT-001/MGYG-HGUT-00189/genomes1/GUT_GENOME094176.gff.gz		5
GUT_GENOME094181	FengQ_2015__SID530600__bin.68	CIBIO	MAG	2903640	44	92483	44.07	98.45	0.17		0	0	0	16		GUT_GENOME001379	MGYG-HGUT-00231	Coprococcus eutactus_A	ERS608535	ERP008729	Austria	Europe	ftp://ftp.ebi.ac.uk/pub/databases/metagenomics/mgnify_genomes/human-gut/v1.0/all_genomes/MGYG-HGUT-002/MGYG-HGUT-00231/genomes2/GUT_GENOME094181.gff.gz		2
GUT_GENOME094324	FengQ_2015__SID530743__bin.29	CIBIO	MAG	2651958	55	66427	43.39	96.64	0		0	0	9.16	17		GUT_GENOME000055	MGYG-HGUT-00018	Coprococcus eutactus	ERS608550	ERP008729	Austria	Europe	ftp://ftp.ebi.ac.uk/pub/databases/metagenomics/mgnify_genomes/human-gut/v1.0/all_genomes/MGYG-HGUT-000/MGYG-HGUT-00018/genomes1/GUT_GENOME094324.gff.gz		1
GUT_GENOME094431	FengQ_2015__SID530867__bin.82	CIBIO	MAG	2780656	40	206055	41.22	98.66	0.69		0	0	8.62	17		GUT_GENOME001027	MGYG-HGUT-00189	Coprococcus sp900066115	ERS608551	ERP008729	Austria	Europe	ftp://ftp.ebi.ac.uk/pub/databases/metagenomics/mgnify_genomes/human-gut/v1.0/all_genomes/MGYG-HGUT-001/MGYG-HGUT-00189/genomes2/GUT_GENOME094431.gff.gz		4
GUT_GENOME094567	FengQ_2015__SID531248__bin.32	CIBIO	MAG	2960279	24	176123	43.91	99.33	0		0	13.18	0	16		GUT_GENOME001379	MGYG-HGUT-00231	Coprococcus eutactus_A	ERS608608	ERP008729	Austria	Europe	ftp://ftp.ebi.ac.uk/pub/databases/metagenomics/mgnify_genomes/human-gut/v1.0/all_genomes/MGYG-HGUT-002/MGYG-HGUT-00231/genomes1/GUT_GENOME094567.gff.gz		2
GUT_GENOME094574	FengQ_2015__SID531248__bin.55	CIBIO	MAG	2536545	50	84070	41.5	98.49	0.67		0	11.35	0	15		GUT_GENOME001027	MGYG-HGUT-00189	Coprococcus sp900066115	ERS608608	ERP008729	Austria	Europe	ftp://ftp.ebi.ac.uk/pub/databases/metagenomics/mgnify_genomes/human-gut/v1.0/all_genomes/MGYG-HGUT-001/MGYG-HGUT-00189/genomes2/GUT_GENOME094574.gff.gz		4
GUT_GENOME095202	FerrettiP_2018__CA_C10002MS2016FE_t0M15__bin.33	CIBIO	MAG	2737809	163	24241	44.48	96.98	0		0	0	0	12		GUT_GENOME001379	MGYG-HGUT-00231	Coprococcus eutactus_A	SRS1992896		Italy	Europe	ftp://ftp.ebi.ac.uk/pub/databases/metagenomics/mgnify_genomes/human-gut/v1.0/all_genomes/MGYG-HGUT-002/MGYG-HGUT-00231/genomes1/GUT_GENOME095202.gff.gz		2
GUT_GENOME095961	GCF_000154245	NCBI	Isolate	2954116	25	197148	41.37	99.33	0		0	99.74	99.79	20	GCF_000154245	GUT_GENOME001027	MGYG-HGUT-00189	Coprococcus sp000154245	SAMN02299417	PRJNA224116			ftp://ftp.ebi.ac.uk/pub/databases/metagenomics/mgnify_genomes/human-gut/v1.0/all_genomes/MGYG-HGUT-001/MGYG-HGUT-00189/genomes1/GUT_GENOME095961.gff.gz		5
GUT_GENOME095969	GCF_000154425	NCBI	Isolate	3102087	32	215819	43.09	99.33	0		0	99.74	99.79	20	GCF_000154425	GUT_GENOME000055	MGYG-HGUT-00018	Coprococcus eutactus	SRS211920	PRJNA224116			ftp://ftp.ebi.ac.uk/pub/databases/metagenomics/mgnify_genomes/human-gut/v1.0/all_genomes/MGYG-HGUT-000/MGYG-HGUT-00018/genomes1/GUT_GENOME095969.gff.gz		1
GUT_GENOME095993	GCF_000155875	NCBI	Isolate	3238915	46	234390	42.49	99.42	0		90.76	99.67	99.62	20	GCF_000155875	GUT_GENOME095993	MGYG-HGUT-01315	Coprococcus comes	SRS000016	PRJNA224116			ftp://ftp.ebi.ac.uk/pub/databases/metagenomics/mgnify_genomes/human-gut/v1.0/all_genomes/MGYG-HGUT-013/MGYG-HGUT-01315/genomes1/GUT_GENOME095993.gff.gz		3
GUT_GENOME098865	HeQ_2017__SZAXPI029551-166__bin.36	CIBIO	MAG	2882326	16	336051	40.41	99.33	0.43		0	0	0	17		GUT_GENOME001027	MGYG-HGUT-00189	Coprococcus sp000154245	ERS1343384	ERP017091	China	Asia	ftp://ftp.ebi.ac.uk/pub/databases/metagenomics/mgnify_genomes/human-gut/v1.0/all_genomes/MGYG-HGUT-001/MGYG-HGUT-00189/genomes2/GUT_GENOME098865.gff.gz		5
GUT_GENOME098902	HeQ_2017__SZAXPI029552-169__bin.37	CIBIO	MAG	2982672	17	235579	43.9	98.29	0		0	70.58	0	19		GUT_GENOME001379	MGYG-HGUT-00231	Coprococcus eutactus_A	ERS1343385	ERP017091	China	Asia	ftp://ftp.ebi.ac.uk/pub/databases/metagenomics/mgnify_genomes/human-gut/v1.0/all_genomes/MGYG-HGUT-002/MGYG-HGUT-00231/genomes3/GUT_GENOME098902.gff.gz		2
GUT_GENOME099248	HeQ_2017__SZAXPI029566-78__bin.15	CIBIO	MAG	2596461	37	115434	41.12	99.33	0		0	70.58	0	15		GUT_GENOME001027	MGYG-HGUT-00189	Coprococcus sp000154245	ERS1343399	ERP017091	China	Asia	ftp://ftp.ebi.ac.uk/pub/databases/metagenomics/mgnify_genomes/human-gut/v1.0/all_genomes/MGYG-HGUT-001/MGYG-HGUT-00189/genomes2/GUT_GENOME099248.gff.gz		5
GUT_GENOME099487	HeQ_2017__SZAXPI029573-88__bin.34	CIBIO	MAG	2661401	34	98199	41.23	99.33	0		0	48.4	0	17		GUT_GENOME001027	MGYG-HGUT-00189	Coprococcus sp900066115	ERS1343406	ERP017091	China	Asia	ftp://ftp.ebi.ac.uk/pub/databases/metagenomics/mgnify_genomes/human-gut/v1.0/all_genomes/MGYG-HGUT-001/MGYG-HGUT-00189/genomes1/GUT_GENOME099487.gff.gz		4
GUT_GENOME099786	HeQ_2017__SZAXPI029584-102__bin.48	CIBIO	MAG	2631053	28	160969	41.36	98.66	0		0	0	0	17		GUT_GENOME001027	MGYG-HGUT-00189	Coprococcus sp900066115	ERS1343417	ERP017091	China	Asia	ftp://ftp.ebi.ac.uk/pub/databases/metagenomics/mgnify_genomes/human-gut/v1.0/all_genomes/MGYG-HGUT-001/MGYG-HGUT-00189/genomes2/GUT_GENOME099786.gff.gz		4
GUT_GENOME099820	HeQ_2017__SZAXPI029585-104__bin.37	CIBIO	MAG	2620764	19	243434	41.45	99.33	0		0	0	11.32	16		GUT_GENOME001027	MGYG-HGUT-00189	Coprococcus sp900066115	ERS1343418	ERP017091	China	Asia	ftp://ftp.ebi.ac.uk/pub/databases/metagenomics/mgnify_genomes/human-gut/v1.0/all_genomes/MGYG-HGUT-001/MGYG-HGUT-00189/genomes1/GUT_GENOME099820.gff.gz		4
GUT_GENOME100029	HeQ_2017__SZAXPI029594-136__bin.16	CIBIO	MAG	2966260	27	207242	43.76	99.33	0.34		0	0	5.37	17		GUT_GENOME001379	MGYG-HGUT-00231	Coprococcus eutactus_A	ERS1343429	ERP017091	China	Asia	ftp://ftp.ebi.ac.uk/pub/databases/metagenomics/mgnify_genomes/human-gut/v1.0/all_genomes/MGYG-HGUT-002/MGYG-HGUT-00231/genomes1/GUT_GENOME100029.gff.gz		2
GUT_GENOME100068	HeQ_2017__SZAXPI029596-142__bin.37	CIBIO	MAG	2624105	33	229644	41.38	99.33	0.06		0	0	0	15		GUT_GENOME001027	MGYG-HGUT-00189	Coprococcus sp900066115	ERS1343430	ERP017091	China	Asia	ftp://ftp.ebi.ac.uk/pub/databases/metagenomics/mgnify_genomes/human-gut/v1.0/all_genomes/MGYG-HGUT-001/MGYG-HGUT-00189/genomes2/GUT_GENOME100068.gff.gz		4
GUT_GENOME100295	HMP_2012__SRS011084__bin.10	CIBIO	MAG	2924162	76	60542	43.94	98.66	0		0	0	0	14		GUT_GENOME001379	MGYG-HGUT-00231	Coprococcus eutactus_A	SRS011084	SRP002163	United States	North America	ftp://ftp.ebi.ac.uk/pub/databases/metagenomics/mgnify_genomes/human-gut/v1.0/all_genomes/MGYG-HGUT-002/MGYG-HGUT-00231/genomes1/GUT_GENOME100295.gff.gz		2
GUT_GENOME100689	HMP_2012__SRS013951__bin.36	CIBIO	MAG	2617913	40	112182	41.11	99.33	0		0	52.51	0	17		GUT_GENOME001027	MGYG-HGUT-00189	Coprococcus sp000154245	SRS013951	SRP002163	United States	North America	ftp://ftp.ebi.ac.uk/pub/databases/metagenomics/mgnify_genomes/human-gut/v1.0/all_genomes/MGYG-HGUT-001/MGYG-HGUT-00189/genomes1/GUT_GENOME100689.gff.gz		5
GUT_GENOME100777	HMP_2012__SRS014459__bin.28	CIBIO	MAG	2759015	108	37118	44.29	98.28	0.67		0	0	0	12		GUT_GENOME001379	MGYG-HGUT-00231	Coprococcus eutactus_A	SRS014459	SRP002163	United States	North America	ftp://ftp.ebi.ac.uk/pub/databases/metagenomics/mgnify_genomes/human-gut/v1.0/all_genomes/MGYG-HGUT-002/MGYG-HGUT-00231/genomes2/GUT_GENOME100777.gff.gz		2
GUT_GENOME100934	HMP_2012__SRS015065__bin.51	CIBIO	MAG	2822770	44	88445	44.2	98.66	0		0	0	0	17		GUT_GENOME001379	MGYG-HGUT-00231	Coprococcus eutactus_A	SRS015065	SRP002163	United States	North America	ftp://ftp.ebi.ac.uk/pub/databases/metagenomics/mgnify_genomes/human-gut/v1.0/all_genomes/MGYG-HGUT-002/MGYG-HGUT-00231/genomes2/GUT_GENOME100934.gff.gz		2
GUT_GENOME101020	HMP_2012__SRS015217__bin.8	CIBIO	MAG	2734341	34	242049	40.87	99.33	0		0	51.99	0	16		GUT_GENOME001027	MGYG-HGUT-00189	Coprococcus sp000154245	SRS015217	SRP002163	United States	North America	ftp://ftp.ebi.ac.uk/pub/databases/metagenomics/mgnify_genomes/human-gut/v1.0/all_genomes/MGYG-HGUT-001/MGYG-HGUT-00189/genomes1/GUT_GENOME101020.gff.gz		5
GUT_GENOME101171	HMP_2012__SRS015854__bin.14	CIBIO	MAG	2726654	34	142849	43.11	98.66	0		0	0	0	18		GUT_GENOME000055	MGYG-HGUT-00018	Coprococcus eutactus	SRS015854	SRP002163	United States	North America	ftp://ftp.ebi.ac.uk/pub/databases/metagenomics/mgnify_genomes/human-gut/v1.0/all_genomes/MGYG-HGUT-000/MGYG-HGUT-00018/genomes1/GUT_GENOME101171.gff.gz		1
GUT_GENOME101768	HMP_2012__SRS019582__bin.54	CIBIO	MAG	2580177	40	114152	41.05	96.64	0		0	17.68	11.21	18		GUT_GENOME001027	MGYG-HGUT-00189	Coprococcus sp000154245	SRS019582	SRP002163	United States	North America	ftp://ftp.ebi.ac.uk/pub/databases/metagenomics/mgnify_genomes/human-gut/v1.0/all_genomes/MGYG-HGUT-001/MGYG-HGUT-00189/genomes2/GUT_GENOME101768.gff.gz		5
GUT_GENOME101902	HMP_2012__SRS020328__bin.30	CIBIO	MAG	2620968	23	183737	41.44	99.33	0		0	0	0	16		GUT_GENOME001027	MGYG-HGUT-00189	Coprococcus sp900066115	SRS020328	SRP002163	United States	North America	ftp://ftp.ebi.ac.uk/pub/databases/metagenomics/mgnify_genomes/human-gut/v1.0/all_genomes/MGYG-HGUT-001/MGYG-HGUT-00189/genomes1/GUT_GENOME101902.gff.gz		4
GUT_GENOME102198	HMP_2012__SRS023914__bin.14	CIBIO	MAG	2598305	39	97415	41.45	99.33	0.02		0	0	5.78	19		GUT_GENOME001027	MGYG-HGUT-00189	Coprococcus sp900066115	SRS023914	SRP002163	United States	North America	ftp://ftp.ebi.ac.uk/pub/databases/metagenomics/mgnify_genomes/human-gut/v1.0/all_genomes/MGYG-HGUT-001/MGYG-HGUT-00189/genomes2/GUT_GENOME102198.gff.gz		4
GUT_GENOME102333	HMP_2012__SRS024331__bin.24	CIBIO	MAG	2814905	92	43509	44.19	95.97	0		0	52.51	0	17		GUT_GENOME001379	MGYG-HGUT-00231	Coprococcus eutactus_A	SRS024331	SRP002163	United States	North America	ftp://ftp.ebi.ac.uk/pub/databases/metagenomics/mgnify_genomes/human-gut/v1.0/all_genomes/MGYG-HGUT-002/MGYG-HGUT-00231/genomes1/GUT_GENOME102333.gff.gz		2
GUT_GENOME103072	HMP_2012__SRS054956__bin.5	CIBIO	MAG	3359831	287	20019	42.05	98.54	0.7		0	0	5.3	18		GUT_GENOME095993	MGYG-HGUT-01315	Coprococcus comes	SRS054956	SRP002163	United States	North America	ftp://ftp.ebi.ac.uk/pub/databases/metagenomics/mgnify_genomes/human-gut/v1.0/all_genomes/MGYG-HGUT-013/MGYG-HGUT-01315/genomes1/GUT_GENOME103072.gff.gz		3
GUT_GENOME103790	IMG_2802429554	PATRIC/IMG	Isolate	3173020	19	406660	43.76	99.33	0		0	99.74	99.79	20	2802429554	GUT_GENOME001379	MGYG-HGUT-00231	Coprococcus eutactus_A	ERS852574	PRJEB10915	United Kingdom	Europe	ftp://ftp.ebi.ac.uk/pub/databases/metagenomics/mgnify_genomes/human-gut/v1.0/all_genomes/MGYG-HGUT-002/MGYG-HGUT-00231/genomes1/GUT_GENOME103790.gff.gz		2
GUT_GENOME103915	KarlssonFH_2013__S118__bin.15	CIBIO	MAG	2976858	31	283274	43.63	98.07	0.98		0	0	11.21	14		GUT_GENOME001379	MGYG-HGUT-00231	Coprococcus eutactus_A	ERS235614	ERP002469	Sweden	Europe	ftp://ftp.ebi.ac.uk/pub/databases/metagenomics/mgnify_genomes/human-gut/v1.0/all_genomes/MGYG-HGUT-002/MGYG-HGUT-00231/genomes3/GUT_GENOME103915.gff.gz		2
GUT_GENOME104020	KarlssonFH_2013__S143__bin.45	CIBIO	MAG	2942506	33	139757	44.03	99.33	0		0	10.18	0	17		GUT_GENOME001379	MGYG-HGUT-00231	Coprococcus eutactus_A	ERS235620	ERP002469	Sweden	Europe	ftp://ftp.ebi.ac.uk/pub/databases/metagenomics/mgnify_genomes/human-gut/v1.0/all_genomes/MGYG-HGUT-002/MGYG-HGUT-00231/genomes2/GUT_GENOME104020.gff.gz		2
GUT_GENOME104093	KarlssonFH_2013__S153__bin.9	CIBIO	MAG	2855502	28	176108	44.04	99.33	0		0	0	0	19		GUT_GENOME001379	MGYG-HGUT-00231	Coprococcus eutactus_A	ERS235623	ERP002469	Germany	Europe	ftp://ftp.ebi.ac.uk/pub/databases/metagenomics/mgnify_genomes/human-gut/v1.0/all_genomes/MGYG-HGUT-002/MGYG-HGUT-00231/genomes1/GUT_GENOME104093.gff.gz		2
GUT_GENOME104108	KarlssonFH_2013__S155__bin.44	CIBIO	MAG	2648131	45	113171	41.05	99.33	0.67		0	0	0	16		GUT_GENOME001027	MGYG-HGUT-00189	Coprococcus sp000154245	ERS235624	ERP002469	France	Europe	ftp://ftp.ebi.ac.uk/pub/databases/metagenomics/mgnify_genomes/human-gut/v1.0/all_genomes/MGYG-HGUT-001/MGYG-HGUT-00189/genomes2/GUT_GENOME104108.gff.gz		5
GUT_GENOME104152	KarlssonFH_2013__S187__bin.33	CIBIO	MAG	2771568	61	70011	44.2	96.9	0.17		0	0	11.21	16		GUT_GENOME001379	MGYG-HGUT-00231	Coprococcus eutactus_A	ERS235627	ERP002469	Sweden	Europe	ftp://ftp.ebi.ac.uk/pub/databases/metagenomics/mgnify_genomes/human-gut/v1.0/all_genomes/MGYG-HGUT-002/MGYG-HGUT-00231/genomes1/GUT_GENOME104152.gff.gz		2
GUT_GENOME104287	KarlssonFH_2013__S200__bin.39	CIBIO	MAG	2375479	52	65858	41.97	99.04	0		0	15.79	0	16		GUT_GENOME140272	MGYG-HGUT-02289	Coprococcus sp000433075	ERS235592	ERP002469	Sweden	Europe	ftp://ftp.ebi.ac.uk/pub/databases/metagenomics/mgnify_genomes/human-gut/v1.0/all_genomes/MGYG-HGUT-022/MGYG-HGUT-02289/genomes1/GUT_GENOME104287.gff.gz		8
GUT_GENOME104328	KarlssonFH_2013__S224__bin.3	CIBIO	MAG	2633018	82	62130	41.24	98.66	0		0	0	0	14		GUT_GENOME001027	MGYG-HGUT-00189	Coprococcus sp900066115	ERS235594	ERP002469	Sweden	Europe	ftp://ftp.ebi.ac.uk/pub/databases/metagenomics/mgnify_genomes/human-gut/v1.0/all_genomes/MGYG-HGUT-001/MGYG-HGUT-00189/genomes2/GUT_GENOME104328.gff.gz		4
GUT_GENOME104333	KarlssonFH_2013__S225__bin.16	CIBIO	MAG	2347812	17	242077	41.32	95.61	0		0	0	11.21	19		GUT_GENOME001027	MGYG-HGUT-00189	Coprococcus sp900066115	ERS235595	ERP002469	Sweden	Europe	ftp://ftp.ebi.ac.uk/pub/databases/metagenomics/mgnify_genomes/human-gut/v1.0/all_genomes/MGYG-HGUT-001/MGYG-HGUT-00189/genomes1/GUT_GENOME104333.gff.gz		4
GUT_GENOME104345	KarlssonFH_2013__S227__bin.17	CIBIO	MAG	2698674	113	41043	44.28	95.36	0.67		0	0	0	14		GUT_GENOME001379	MGYG-HGUT-00231	Coprococcus eutactus_A	ERS235596	ERP002469	Sweden	Europe	ftp://ftp.ebi.ac.uk/pub/databases/metagenomics/mgnify_genomes/human-gut/v1.0/all_genomes/MGYG-HGUT-002/MGYG-HGUT-00231/genomes1/GUT_GENOME104345.gff.gz		2
GUT_GENOME104503	KarlssonFH_2013__S268__bin.11	CIBIO	MAG	2688540	50	106734	41.27	98.36	0		0	0	11.21	19		GUT_GENOME001027	MGYG-HGUT-00189	Coprococcus sp900066115	ERS235607	ERP002469	Sweden	Europe	ftp://ftp.ebi.ac.uk/pub/databases/metagenomics/mgnify_genomes/human-gut/v1.0/all_genomes/MGYG-HGUT-001/MGYG-HGUT-00189/genomes1/GUT_GENOME104503.gff.gz		4
GUT_GENOME104513	KarlssonFH_2013__S268__bin.32	CIBIO	MAG	2673997	109	38636	44.24	95.97	0		0	0	0	11		GUT_GENOME001379	MGYG-HGUT-00231	Coprococcus eutactus_A	ERS235607	ERP002469	Sweden	Europe	ftp://ftp.ebi.ac.uk/pub/databases/metagenomics/mgnify_genomes/human-gut/v1.0/all_genomes/MGYG-HGUT-002/MGYG-HGUT-00231/genomes3/GUT_GENOME104513.gff.gz		2
GUT_GENOME104604	KarlssonFH_2013__S299__bin.28	CIBIO	MAG	2918297	35	207353	42.9	99.33	0		0	0	14.53	17		GUT_GENOME000055	MGYG-HGUT-00018	Coprococcus eutactus	ERS235612	ERP002469	Sweden	Europe	ftp://ftp.ebi.ac.uk/pub/databases/metagenomics/mgnify_genomes/human-gut/v1.0/all_genomes/MGYG-HGUT-000/MGYG-HGUT-00018/genomes1/GUT_GENOME104604.gff.gz		1
GUT_GENOME105205	KarlssonFH_2013__S434__bin.5	CIBIO	MAG	2633839	38	146248	40.94	99.33	0.67		0	0	0	17		GUT_GENOME001027	MGYG-HGUT-00189	Coprococcus sp000154245	ERS235529	ERP002469	Sweden	Europe	ftp://ftp.ebi.ac.uk/pub/databases/metagenomics/mgnify_genomes/human-gut/v1.0/all_genomes/MGYG-HGUT-001/MGYG-HGUT-00189/genomes2/GUT_GENOME105205.gff.gz		5
GUT_GENOME105221	KarlssonFH_2013__S436__bin.32	CIBIO	MAG	2787146	56	69588	43.14	98.32	0.67		0	0	0	12		GUT_GENOME000055	MGYG-HGUT-00018	Coprococcus eutactus	ERS235530	ERP002469	Sweden	Europe	ftp://ftp.ebi.ac.uk/pub/databases/metagenomics/mgnify_genomes/human-gut/v1.0/all_genomes/MGYG-HGUT-000/MGYG-HGUT-00018/genomes1/GUT_GENOME105221.gff.gz		1
GUT_GENOME105380	KarlssonFH_2013__S457__bin.31	CIBIO	MAG	2586090	40	98448	41.22	96.98	0		0	0	0	14		GUT_GENOME001027	MGYG-HGUT-00189	Coprococcus sp000154245	ERS235536	ERP002469	Sweden	Europe	ftp://ftp.ebi.ac.uk/pub/databases/metagenomics/mgnify_genomes/human-gut/v1.0/all_genomes/MGYG-HGUT-001/MGYG-HGUT-00189/genomes1/GUT_GENOME105380.gff.gz		5
GUT_GENOME105403	KarlssonFH_2013__S458__bin.27	CIBIO	MAG	2588306	42	103776	41.48	97.36	0		0	0	0	15		GUT_GENOME001027	MGYG-HGUT-00189	Coprococcus sp900066115	ERS235537	ERP002469	Sweden	Europe	ftp://ftp.ebi.ac.uk/pub/databases/metagenomics/mgnify_genomes/human-gut/v1.0/all_genomes/MGYG-HGUT-001/MGYG-HGUT-00189/genomes1/GUT_GENOME105403.gff.gz		4
GUT_GENOME105452	KarlssonFH_2013__S462__bin.43	CIBIO	MAG	2315225	34	114880	42.02	99.33	0		0	0	5.33	18		GUT_GENOME140272	MGYG-HGUT-02289	Coprococcus sp000433075	ERS235538	ERP002469	Sweden	Europe	ftp://ftp.ebi.ac.uk/pub/databases/metagenomics/mgnify_genomes/human-gut/v1.0/all_genomes/MGYG-HGUT-022/MGYG-HGUT-02289/genomes1/GUT_GENOME105452.gff.gz		8
GUT_GENOME105492	KarlssonFH_2013__S468__bin.2	CIBIO	MAG	2598980	96	49583	41.36	97.99	0.89		0	0	0	15		GUT_GENOME001027	MGYG-HGUT-00189	Coprococcus sp900066115	ERS235540	ERP002469	Hungary	Europe	ftp://ftp.ebi.ac.uk/pub/databases/metagenomics/mgnify_genomes/human-gut/v1.0/all_genomes/MGYG-HGUT-001/MGYG-HGUT-00189/genomes2/GUT_GENOME105492.gff.gz		4
GUT_GENOME105591	KarlssonFH_2013__S478__bin.50	CIBIO	MAG	2606198	40	183603	41.4	95.97	0		0	0	0	15		GUT_GENOME001027	MGYG-HGUT-00189	Coprococcus sp900066115	ERS235543	ERP002469	Sweden	Europe	ftp://ftp.ebi.ac.uk/pub/databases/metagenomics/mgnify_genomes/human-gut/v1.0/all_genomes/MGYG-HGUT-001/MGYG-HGUT-00189/genomes1/GUT_GENOME105591.gff.gz		4
GUT_GENOME105714	KarlssonFH_2013__S487__bin.55	CIBIO	MAG	2755386	84	58911	43	97.99	0		0	0	0	15		GUT_GENOME000055	MGYG-HGUT-00018	Coprococcus eutactus	ERS235547	ERP002469	Sweden	Europe	ftp://ftp.ebi.ac.uk/pub/databases/metagenomics/mgnify_genomes/human-gut/v1.0/all_genomes/MGYG-HGUT-000/MGYG-HGUT-00018/genomes1/GUT_GENOME105714.gff.gz		1
GUT_GENOME105737	KarlssonFH_2013__S488__bin.40	CIBIO	MAG	3040806	40	136713	42.95	99.08	0		0	0	0	16		GUT_GENOME000055	MGYG-HGUT-00018	Coprococcus eutactus	ERS235548	ERP002469	Sweden	Europe	ftp://ftp.ebi.ac.uk/pub/databases/metagenomics/mgnify_genomes/human-gut/v1.0/all_genomes/MGYG-HGUT-000/MGYG-HGUT-00018/genomes1/GUT_GENOME105737.gff.gz		1
GUT_GENOME105828	KarlssonFH_2013__S517__bin.51	CIBIO	MAG	2913085	26	179354	42.76	99.33	0		0	0	0	19		GUT_GENOME105828	MGYG-HGUT-01745	Coprococcus sp.	ERS235552	ERP002469	Sweden	Europe	ftp://ftp.ebi.ac.uk/pub/databases/metagenomics/mgnify_genomes/human-gut/v1.0/all_genomes/MGYG-HGUT-017/MGYG-HGUT-01745/genomes1/GUT_GENOME105828.gff.gz		7
GUT_GENOME106014	KarlssonFH_2013__S543__bin.53	CIBIO	MAG	2911243	43	88413	43.92	99.33	0		0	0	0	18		GUT_GENOME001379	MGYG-HGUT-00231	Coprococcus eutactus_A	ERS235560	ERP002469	Sweden	Europe	ftp://ftp.ebi.ac.uk/pub/databases/metagenomics/mgnify_genomes/human-gut/v1.0/all_genomes/MGYG-HGUT-002/MGYG-HGUT-00231/genomes3/GUT_GENOME106014.gff.gz		2
GUT_GENOME106042	KarlssonFH_2013__S547__bin.56	CIBIO	MAG	2740833	31	233788	40.78	97.32	0.43		0	0	0	15		GUT_GENOME001027	MGYG-HGUT-00189	Coprococcus sp900066115	ERS235561	ERP002469	Sweden	Europe	ftp://ftp.ebi.ac.uk/pub/databases/metagenomics/mgnify_genomes/human-gut/v1.0/all_genomes/MGYG-HGUT-001/MGYG-HGUT-00189/genomes1/GUT_GENOME106042.gff.gz		4
GUT_GENOME106106	KarlssonFH_2013__S552__bin.31	CIBIO	MAG	3008158	40	134198	43.85	98.99	0		0	0	8.58	19		GUT_GENOME001379	MGYG-HGUT-00231	Coprococcus eutactus_A	ERS235563	ERP002469	Sweden	Europe	ftp://ftp.ebi.ac.uk/pub/databases/metagenomics/mgnify_genomes/human-gut/v1.0/all_genomes/MGYG-HGUT-002/MGYG-HGUT-00231/genomes4/GUT_GENOME106106.gff.gz		2
GUT_GENOME106202	KarlssonFH_2013__S577__bin.7	CIBIO	MAG	3126082	32	198414	43.93	99.33	0		0	0	0	18		GUT_GENOME001379	MGYG-HGUT-00231	Coprococcus eutactus_A	ERS235567	ERP002469	Sweden	Europe	ftp://ftp.ebi.ac.uk/pub/databases/metagenomics/mgnify_genomes/human-gut/v1.0/all_genomes/MGYG-HGUT-002/MGYG-HGUT-00231/genomes1/GUT_GENOME106202.gff.gz		2
GUT_GENOME106216	KarlssonFH_2013__S584__bin.30	CIBIO	MAG	2570094	33	189295	41.37	98.66	0		0	70.58	5.78	19		GUT_GENOME001027	MGYG-HGUT-00189	Coprococcus sp900066115	ERS235569	ERP002469	Sweden	Europe	ftp://ftp.ebi.ac.uk/pub/databases/metagenomics/mgnify_genomes/human-gut/v1.0/all_genomes/MGYG-HGUT-001/MGYG-HGUT-00189/genomes2/GUT_GENOME106216.gff.gz		4
GUT_GENOME106289	KarlssonFH_2013__S591__bin.25	CIBIO	MAG	2619342	22	244033	40.8	98.66	0		0	0	0	18		GUT_GENOME001027	MGYG-HGUT-00189	Coprococcus sp000154245	ERS235572	ERP002469	Sweden	Europe	ftp://ftp.ebi.ac.uk/pub/databases/metagenomics/mgnify_genomes/human-gut/v1.0/all_genomes/MGYG-HGUT-001/MGYG-HGUT-00189/genomes2/GUT_GENOME106289.gff.gz		5
GUT_GENOME106352	KarlssonFH_2013__S600__bin.30	CIBIO	MAG	2457996	30	210271	41.36	96.22	0		0	0	0	19		GUT_GENOME001027	MGYG-HGUT-00189	Coprococcus sp900066115	ERS235575	ERP002469	Sweden	Europe	ftp://ftp.ebi.ac.uk/pub/databases/metagenomics/mgnify_genomes/human-gut/v1.0/all_genomes/MGYG-HGUT-001/MGYG-HGUT-00189/genomes1/GUT_GENOME106352.gff.gz		4
GUT_GENOME106404	KarlssonFH_2013__S60__bin.25	CIBIO	MAG	2925228	24	269300	43	98.66	0		0	0	0	18		GUT_GENOME000055	MGYG-HGUT-00018	Coprococcus eutactus	ERS235576	ERP002469	Sweden	Europe	ftp://ftp.ebi.ac.uk/pub/databases/metagenomics/mgnify_genomes/human-gut/v1.0/all_genomes/MGYG-HGUT-000/MGYG-HGUT-00018/genomes1/GUT_GENOME106404.gff.gz		1
GUT_GENOME106515	KarlssonFH_2013__S80__bin.13	CIBIO	MAG	2957033	36	149113	43.94	99.33	0		0	52.51	0	16		GUT_GENOME001379	MGYG-HGUT-00231	Coprococcus eutactus_A	ERS235589	ERP002469	Sweden	Europe	ftp://ftp.ebi.ac.uk/pub/databases/metagenomics/mgnify_genomes/human-gut/v1.0/all_genomes/MGYG-HGUT-002/MGYG-HGUT-00231/genomes1/GUT_GENOME106515.gff.gz		2
GUT_GENOME106854	KosticAD_2015__PRJNA231909.3108440__bin.10	CIBIO	MAG	2728945	102	47015	43.25	95.81	0.89		0	28.25	0	16		GUT_GENOME000055	MGYG-HGUT-00018	Coprococcus eutactus	SRS871073	SRP056054	Finland	Europe	ftp://ftp.ebi.ac.uk/pub/databases/metagenomics/mgnify_genomes/human-gut/v1.0/all_genomes/MGYG-HGUT-000/MGYG-HGUT-00018/genomes1/GUT_GENOME106854.gff.gz		1
GUT_GENOME107444	KosticAD_2015__PRJNA231909.3115087__bin.5	CIBIO	MAG	2539570	127	33147	44.54	96.11	0.34		0	17.68	0	15		GUT_GENOME001379	MGYG-HGUT-00231	Coprococcus eutactus_A	SRS871624	SRP056054	Finland	Europe	ftp://ftp.ebi.ac.uk/pub/databases/metagenomics/mgnify_genomes/human-gut/v1.0/all_genomes/MGYG-HGUT-002/MGYG-HGUT-00231/genomes1/GUT_GENOME107444.gff.gz		2
GUT_GENOME107883	LeChatelierE_2013__MH0019__bin.3	CIBIO	MAG	2798426	46	90554	44.14	97.44	0		0	0	0	14		GUT_GENOME001379	MGYG-HGUT-00231	Coprococcus eutactus_A	ERS328734	ERP003612	Denmark	Europe	ftp://ftp.ebi.ac.uk/pub/databases/metagenomics/mgnify_genomes/human-gut/v1.0/all_genomes/MGYG-HGUT-002/MGYG-HGUT-00231/genomes1/GUT_GENOME107883.gff.gz		2
GUT_GENOME108133	LeChatelierE_2013__MH0044__bin.23	CIBIO	MAG	2326856	69	55180	42.06	98.71	0.69		0	0	0	13		GUT_GENOME140272	MGYG-HGUT-02289	Coprococcus sp000433075	ERS328758	ERP003612	Denmark	Europe	ftp://ftp.ebi.ac.uk/pub/databases/metagenomics/mgnify_genomes/human-gut/v1.0/all_genomes/MGYG-HGUT-022/MGYG-HGUT-02289/genomes1/GUT_GENOME108133.gff.gz		8
GUT_GENOME108140	LeChatelierE_2013__MH0044__bin.3	CIBIO	MAG	2509876	42	104251	41.39	97.99	0		0	0	0	15		GUT_GENOME001027	MGYG-HGUT-00189	Coprococcus sp900066115	ERS328758	ERP003612	Denmark	Europe	ftp://ftp.ebi.ac.uk/pub/databases/metagenomics/mgnify_genomes/human-gut/v1.0/all_genomes/MGYG-HGUT-001/MGYG-HGUT-00189/genomes1/GUT_GENOME108140.gff.gz		4
GUT_GENOME108199	LeChatelierE_2013__MH0050__bin.29	CIBIO	MAG	2670105	137	30644	44.29	98.85	0.31		0	21.27	0	15		GUT_GENOME001379	MGYG-HGUT-00231	Coprococcus eutactus_A	ERS328764	ERP003612	Denmark	Europe	ftp://ftp.ebi.ac.uk/pub/databases/metagenomics/mgnify_genomes/human-gut/v1.0/all_genomes/MGYG-HGUT-002/MGYG-HGUT-00231/genomes1/GUT_GENOME108199.gff.gz		2
GUT_GENOME108683	LeChatelierE_2013__MH0086__bin.29	CIBIO	MAG	2509337	50	62368	41.26	97.82	0.67		0	0	0	15		GUT_GENOME001027	MGYG-HGUT-00189	Coprococcus sp000154245	ERS328800	ERP003612	Denmark	Europe	ftp://ftp.ebi.ac.uk/pub/databases/metagenomics/mgnify_genomes/human-gut/v1.0/all_genomes/MGYG-HGUT-001/MGYG-HGUT-00189/genomes2/GUT_GENOME108683.gff.gz		5
GUT_GENOME108755	LeChatelierE_2013__MH0090__bin.25	CIBIO	MAG	2760935	68	56101	40.76	98.66	0.67		0	0	0	14		GUT_GENOME001027	MGYG-HGUT-00189	Coprococcus sp000154245	ERS328804	ERP003612	Denmark	Europe	ftp://ftp.ebi.ac.uk/pub/databases/metagenomics/mgnify_genomes/human-gut/v1.0/all_genomes/MGYG-HGUT-001/MGYG-HGUT-00189/genomes2/GUT_GENOME108755.gff.gz		5
GUT_GENOME108919	LeChatelierE_2013__MH0098__bin.20	CIBIO	MAG	2587880	46	73277	41.12	99.1	0		0	0	0	13		GUT_GENOME001027	MGYG-HGUT-00189	Coprococcus sp000154245	ERS328812	ERP003612	Denmark	Europe	ftp://ftp.ebi.ac.uk/pub/databases/metagenomics/mgnify_genomes/human-gut/v1.0/all_genomes/MGYG-HGUT-001/MGYG-HGUT-00189/genomes2/GUT_GENOME108919.gff.gz		5
GUT_GENOME109033	LeChatelierE_2013__MH0103__bin.4	CIBIO	MAG	2834752	35	143860	44.04	99.33	0		0	9.39	0	17		GUT_GENOME001379	MGYG-HGUT-00231	Coprococcus eutactus_A	ERS328817	ERP003612	Denmark	Europe	ftp://ftp.ebi.ac.uk/pub/databases/metagenomics/mgnify_genomes/human-gut/v1.0/all_genomes/MGYG-HGUT-002/MGYG-HGUT-00231/genomes3/GUT_GENOME109033.gff.gz		2
GUT_GENOME109088	LeChatelierE_2013__MH0107__bin.22	CIBIO	MAG	2736774	41	139220	44.19	96.82	0		0	0	10.74	17		GUT_GENOME001379	MGYG-HGUT-00231	Coprococcus eutactus_A	ERS328821	ERP003612	Denmark	Europe	ftp://ftp.ebi.ac.uk/pub/databases/metagenomics/mgnify_genomes/human-gut/v1.0/all_genomes/MGYG-HGUT-002/MGYG-HGUT-00231/genomes1/GUT_GENOME109088.gff.gz		2
GUT_GENOME109191	LeChatelierE_2013__MH0115__bin.1	CIBIO	MAG	2972181	51	90324	42.84	99.12	0		0	0	0	16		GUT_GENOME000055	MGYG-HGUT-00018	Coprococcus eutactus	ERS328828	ERP003612	Denmark	Europe	ftp://ftp.ebi.ac.uk/pub/databases/metagenomics/mgnify_genomes/human-gut/v1.0/all_genomes/MGYG-HGUT-000/MGYG-HGUT-00018/genomes1/GUT_GENOME109191.gff.gz		1
GUT_GENOME109213	LeChatelierE_2013__MH0116__bin.26	CIBIO	MAG	2906951	34	135634	44	98.99	0		0	70.52	10.74	19		GUT_GENOME001379	MGYG-HGUT-00231	Coprococcus eutactus_A	ERS328829	ERP003612	Denmark	Europe	ftp://ftp.ebi.ac.uk/pub/databases/metagenomics/mgnify_genomes/human-gut/v1.0/all_genomes/MGYG-HGUT-002/MGYG-HGUT-00231/genomes3/GUT_GENOME109213.gff.gz		2
GUT_GENOME109285	LeChatelierE_2013__MH0119__bin.26	CIBIO	MAG	2662213	130	28078	44.31	95.53	0		0	0	0	14		GUT_GENOME001379	MGYG-HGUT-00231	Coprococcus eutactus_A	ERS328832	ERP003612	Denmark	Europe	ftp://ftp.ebi.ac.uk/pub/databases/metagenomics/mgnify_genomes/human-gut/v1.0/all_genomes/MGYG-HGUT-002/MGYG-HGUT-00231/genomes1/GUT_GENOME109285.gff.gz		2
GUT_GENOME109432	LeChatelierE_2013__MH0126__bin.23	CIBIO	MAG	2647758	37	131710	40.97	97.99	0.67		0	0	0	18		GUT_GENOME001027	MGYG-HGUT-00189	Coprococcus sp900066115	ERS328839	ERP003612	Denmark	Europe	ftp://ftp.ebi.ac.uk/pub/databases/metagenomics/mgnify_genomes/human-gut/v1.0/all_genomes/MGYG-HGUT-001/MGYG-HGUT-00189/genomes1/GUT_GENOME109432.gff.gz		4
GUT_GENOME109529	LeChatelierE_2013__MH0131__bin.15	CIBIO	MAG	2678020	92	44614	44.39	97.99	0		0	0	0	14		GUT_GENOME001379	MGYG-HGUT-00231	Coprococcus eutactus_A	ERS328844	ERP003612	Denmark	Europe	ftp://ftp.ebi.ac.uk/pub/databases/metagenomics/mgnify_genomes/human-gut/v1.0/all_genomes/MGYG-HGUT-002/MGYG-HGUT-00231/genomes1/GUT_GENOME109529.gff.gz		2
GUT_GENOME109664	LeChatelierE_2013__MH0137__bin.17	CIBIO	MAG	2951832	23	236918	43.97	99.33	0		0	28.25	38.5	17		GUT_GENOME001379	MGYG-HGUT-00231	Coprococcus eutactus_A	ERS328850	ERP003612	Denmark	Europe	ftp://ftp.ebi.ac.uk/pub/databases/metagenomics/mgnify_genomes/human-gut/v1.0/all_genomes/MGYG-HGUT-002/MGYG-HGUT-00231/genomes3/GUT_GENOME109664.gff.gz		2
GUT_GENOME109883	LeChatelierE_2013__MH0145__bin.7	CIBIO	MAG	2735474	24	231614	44.24	98.66	0		0	11.42	0	18		GUT_GENOME001379	MGYG-HGUT-00231	Coprococcus eutactus_A	ERS328858	ERP003612	Denmark	Europe	ftp://ftp.ebi.ac.uk/pub/databases/metagenomics/mgnify_genomes/human-gut/v1.0/all_genomes/MGYG-HGUT-002/MGYG-HGUT-00231/genomes3/GUT_GENOME109883.gff.gz		2
GUT_GENOME109942	LeChatelierE_2013__MH0148__bin.60	CIBIO	MAG	2954861	32	159941	44.02	98.54	0.67		0	0	0	17		GUT_GENOME001379	MGYG-HGUT-00231	Coprococcus eutactus_A	ERS328861	ERP003612	Denmark	Europe	ftp://ftp.ebi.ac.uk/pub/databases/metagenomics/mgnify_genomes/human-gut/v1.0/all_genomes/MGYG-HGUT-002/MGYG-HGUT-00231/genomes2/GUT_GENOME109942.gff.gz		2
GUT_GENOME110179	LeChatelierE_2013__MH0160__bin.21	CIBIO	MAG	2691732	39	140321	44.29	97.32	0.17		0	70.45	0	16		GUT_GENOME001379	MGYG-HGUT-00231	Coprococcus eutactus_A	ERS328873	ERP003612	Denmark	Europe	ftp://ftp.ebi.ac.uk/pub/databases/metagenomics/mgnify_genomes/human-gut/v1.0/all_genomes/MGYG-HGUT-002/MGYG-HGUT-00231/genomes1/GUT_GENOME110179.gff.gz		2
GUT_GENOME110192	LeChatelierE_2013__MH0161__bin.22	CIBIO	MAG	2902342	44	102477	43.99	99.33	0.84		0	25.11	0	18		GUT_GENOME001379	MGYG-HGUT-00231	Coprococcus eutactus_A	ERS328874	ERP003612	Denmark	Europe	ftp://ftp.ebi.ac.uk/pub/databases/metagenomics/mgnify_genomes/human-gut/v1.0/all_genomes/MGYG-HGUT-002/MGYG-HGUT-00231/genomes1/GUT_GENOME110192.gff.gz		2
GUT_GENOME110240	LeChatelierE_2013__MH0162__bin.8	CIBIO	MAG	2630121	36	115933	41.1	99.33	0		0	16.31	0	17		GUT_GENOME001027	MGYG-HGUT-00189	Coprococcus sp000154245	ERS328875	ERP003612	Denmark	Europe	ftp://ftp.ebi.ac.uk/pub/databases/metagenomics/mgnify_genomes/human-gut/v1.0/all_genomes/MGYG-HGUT-001/MGYG-HGUT-00189/genomes1/GUT_GENOME110240.gff.gz		5
GUT_GENOME110379	LeChatelierE_2013__MH0170__bin.26	CIBIO	MAG	2905217	29	139529	44.08	99.33	0		0	0	5.44	19		GUT_GENOME001379	MGYG-HGUT-00231	Coprococcus eutactus_A	ERS328883	ERP003612	Denmark	Europe	ftp://ftp.ebi.ac.uk/pub/databases/metagenomics/mgnify_genomes/human-gut/v1.0/all_genomes/MGYG-HGUT-002/MGYG-HGUT-00231/genomes2/GUT_GENOME110379.gff.gz		2
GUT_GENOME110394	LeChatelierE_2013__MH0172__bin.19	CIBIO	MAG	2579499	41	94936	41.26	97.19	0		0	0	0	14		GUT_GENOME001027	MGYG-HGUT-00189	Coprococcus sp900066115	ERS328884	ERP003612	Denmark	Europe	ftp://ftp.ebi.ac.uk/pub/databases/metagenomics/mgnify_genomes/human-gut/v1.0/all_genomes/MGYG-HGUT-001/MGYG-HGUT-00189/genomes1/GUT_GENOME110394.gff.gz		4
GUT_GENOME110442	LeChatelierE_2013__MH0174__bin.44	CIBIO	MAG	2541770	23	239064	41.41	97.32	0		0	0	0	17		GUT_GENOME001027	MGYG-HGUT-00189	Coprococcus sp900066115	ERS328886	ERP003612	Denmark	Europe	ftp://ftp.ebi.ac.uk/pub/databases/metagenomics/mgnify_genomes/human-gut/v1.0/all_genomes/MGYG-HGUT-001/MGYG-HGUT-00189/genomes1/GUT_GENOME110442.gff.gz		4
GUT_GENOME110623	LeChatelierE_2013__MH0183__bin.50	CIBIO	MAG	2993251	32	147872	43.84	98.66	0		0	11.42	0	16		GUT_GENOME001379	MGYG-HGUT-00231	Coprococcus eutactus_A	ERS328895	ERP003612	Denmark	Europe	ftp://ftp.ebi.ac.uk/pub/databases/metagenomics/mgnify_genomes/human-gut/v1.0/all_genomes/MGYG-HGUT-002/MGYG-HGUT-00231/genomes2/GUT_GENOME110623.gff.gz		2
GUT_GENOME110666	LeChatelierE_2013__MH0185__bin.35	CIBIO	MAG	2846238	30	226522	43.05	95.97	0		0	0	0	15		GUT_GENOME000055	MGYG-HGUT-00018	Coprococcus eutactus	ERS328897	ERP003612	Denmark	Europe	ftp://ftp.ebi.ac.uk/pub/databases/metagenomics/mgnify_genomes/human-gut/v1.0/all_genomes/MGYG-HGUT-000/MGYG-HGUT-00018/genomes1/GUT_GENOME110666.gff.gz		1
GUT_GENOME110913	LeChatelierE_2013__MH0196__bin.37	CIBIO	MAG	2915513	30	167825	43.89	98.66	0		0	0	0	19		GUT_GENOME001379	MGYG-HGUT-00231	Coprococcus eutactus_A	ERS328905	ERP003612	Denmark	Europe	ftp://ftp.ebi.ac.uk/pub/databases/metagenomics/mgnify_genomes/human-gut/v1.0/all_genomes/MGYG-HGUT-002/MGYG-HGUT-00231/genomes3/GUT_GENOME110913.gff.gz		2
GUT_GENOME110933	LeChatelierE_2013__MH0196__bin.68	CIBIO	MAG	2602771	45	89914	40.9	95.97	0		0	0	11.21	12		GUT_GENOME001027	MGYG-HGUT-00189	Coprococcus sp000154245	ERS328905	ERP003612	Denmark	Europe	ftp://ftp.ebi.ac.uk/pub/databases/metagenomics/mgnify_genomes/human-gut/v1.0/all_genomes/MGYG-HGUT-001/MGYG-HGUT-00189/genomes2/GUT_GENOME110933.gff.gz		5
GUT_GENOME111000	LeChatelierE_2013__MH0198__bin.67	CIBIO	MAG	2722999	29	159823	44.23	99.33	0		0	0	11.21	19		GUT_GENOME001379	MGYG-HGUT-00231	Coprococcus eutactus_A	ERS328907	ERP003612	Denmark	Europe	ftp://ftp.ebi.ac.uk/pub/databases/metagenomics/mgnify_genomes/human-gut/v1.0/all_genomes/MGYG-HGUT-002/MGYG-HGUT-00231/genomes2/GUT_GENOME111000.gff.gz		2
GUT_GENOME111083	LeChatelierE_2013__MH0203__bin.103	CIBIO	MAG	2858085	21	274922	44.09	99.33	0		0	0	0	17		GUT_GENOME001379	MGYG-HGUT-00231	Coprococcus eutactus_A	ERS328910	ERP003612	Denmark	Europe	ftp://ftp.ebi.ac.uk/pub/databases/metagenomics/mgnify_genomes/human-gut/v1.0/all_genomes/MGYG-HGUT-002/MGYG-HGUT-00231/genomes3/GUT_GENOME111083.gff.gz		2
GUT_GENOME111149	LeChatelierE_2013__MH0204__bin.35	CIBIO	MAG	2867993	27	168621	44.14	99.33	0		0	0	5.78	17		GUT_GENOME001379	MGYG-HGUT-00231	Coprococcus eutactus_A	ERS328911	ERP003612	Denmark	Europe	ftp://ftp.ebi.ac.uk/pub/databases/metagenomics/mgnify_genomes/human-gut/v1.0/all_genomes/MGYG-HGUT-002/MGYG-HGUT-00231/genomes1/GUT_GENOME111149.gff.gz		2
GUT_GENOME111187	LeChatelierE_2013__MH0205__bin.50	CIBIO	MAG	2799651	16	444247	43.15	99.33	0.67		0	46.9	0	16		GUT_GENOME000055	MGYG-HGUT-00018	Coprococcus eutactus	ERS328912	ERP003612	Denmark	Europe	ftp://ftp.ebi.ac.uk/pub/databases/metagenomics/mgnify_genomes/human-gut/v1.0/all_genomes/MGYG-HGUT-000/MGYG-HGUT-00018/genomes1/GUT_GENOME111187.gff.gz		1
GUT_GENOME111308	LeChatelierE_2013__MH0212__bin.70	CIBIO	MAG	2941826	36	147899	44.03	99.33	0		0	24.27	0	18		GUT_GENOME001379	MGYG-HGUT-00231	Coprococcus eutactus_A	ERS328915	ERP003612	Denmark	Europe	ftp://ftp.ebi.ac.uk/pub/databases/metagenomics/mgnify_genomes/human-gut/v1.0/all_genomes/MGYG-HGUT-002/MGYG-HGUT-00231/genomes1/GUT_GENOME111308.gff.gz		2
GUT_GENOME111406	LeChatelierE_2013__MH0224__bin.41	CIBIO	MAG	2827153	29	201149	44.26	98.99	0		0	0	0	15		GUT_GENOME001379	MGYG-HGUT-00231	Coprococcus eutactus_A	ERS328918	ERP003612	Denmark	Europe	ftp://ftp.ebi.ac.uk/pub/databases/metagenomics/mgnify_genomes/human-gut/v1.0/all_genomes/MGYG-HGUT-002/MGYG-HGUT-00231/genomes2/GUT_GENOME111406.gff.gz		2
GUT_GENOME111414	LeChatelierE_2013__MH0224__bin.55	CIBIO	MAG	2625374	24	205450	41.07	99.33	0		0	0	0	18		GUT_GENOME001027	MGYG-HGUT-00189	Coprococcus sp000154245	ERS328918	ERP003612	Denmark	Europe	ftp://ftp.ebi.ac.uk/pub/databases/metagenomics/mgnify_genomes/human-gut/v1.0/all_genomes/MGYG-HGUT-001/MGYG-HGUT-00189/genomes2/GUT_GENOME111414.gff.gz		5
GUT_GENOME111634	LeChatelierE_2013__MH0243__bin.36	CIBIO	MAG	2627534	90	43281	44.51	96.98	0		0	0	0	15		GUT_GENOME001379	MGYG-HGUT-00231	Coprococcus eutactus_A	ERS328925	ERP003612	Denmark	Europe	ftp://ftp.ebi.ac.uk/pub/databases/metagenomics/mgnify_genomes/human-gut/v1.0/all_genomes/MGYG-HGUT-002/MGYG-HGUT-00231/genomes3/GUT_GENOME111634.gff.gz		2
GUT_GENOME111759	LeChatelierE_2013__MH0250__bin.92	CIBIO	MAG	2969277	31	150427	43.88	99.33	0		0	11.42	0	18		GUT_GENOME001379	MGYG-HGUT-00231	Coprococcus eutactus_A	ERS328928	ERP003612	Denmark	Europe	ftp://ftp.ebi.ac.uk/pub/databases/metagenomics/mgnify_genomes/human-gut/v1.0/all_genomes/MGYG-HGUT-002/MGYG-HGUT-00231/genomes3/GUT_GENOME111759.gff.gz		2
GUT_GENOME111777	LeChatelierE_2013__MH0251__bin.32	CIBIO	MAG	2879929	25	198990	44	99.33	0		0	28.25	0	18		GUT_GENOME001379	MGYG-HGUT-00231	Coprococcus eutactus_A	ERS328929	ERP003612	Denmark	Europe	ftp://ftp.ebi.ac.uk/pub/databases/metagenomics/mgnify_genomes/human-gut/v1.0/all_genomes/MGYG-HGUT-002/MGYG-HGUT-00231/genomes3/GUT_GENOME111777.gff.gz		2
GUT_GENOME111840	LeChatelierE_2013__MH0257__bin.10	CIBIO	MAG	2757309	31	146195	44.15	98.66	0		0	0	11.21	18		GUT_GENOME001379	MGYG-HGUT-00231	Coprococcus eutactus_A	ERS328931	ERP003612	Denmark	Europe	ftp://ftp.ebi.ac.uk/pub/databases/metagenomics/mgnify_genomes/human-gut/v1.0/all_genomes/MGYG-HGUT-002/MGYG-HGUT-00231/genomes1/GUT_GENOME111840.gff.gz		2
GUT_GENOME112073	LeChatelierE_2013__MH0276__bin.99	CIBIO	MAG	2677936	33	152122	44.32	98.66	0		0	0	0	14		GUT_GENOME001379	MGYG-HGUT-00231	Coprococcus eutactus_A	ERS328936	ERP003612	Denmark	Europe	ftp://ftp.ebi.ac.uk/pub/databases/metagenomics/mgnify_genomes/human-gut/v1.0/all_genomes/MGYG-HGUT-002/MGYG-HGUT-00231/genomes2/GUT_GENOME112073.gff.gz		2
GUT_GENOME112343	LeChatelierE_2013__MH0313__bin.69	CIBIO	MAG	2801149	66	64024	44.26	98.6	0.06		0	0	5.78	15		GUT_GENOME001379	MGYG-HGUT-00231	Coprococcus eutactus_A	ERS328946	ERP003612	Denmark	Europe	ftp://ftp.ebi.ac.uk/pub/databases/metagenomics/mgnify_genomes/human-gut/v1.0/all_genomes/MGYG-HGUT-002/MGYG-HGUT-00231/genomes3/GUT_GENOME112343.gff.gz		2
GUT_GENOME112377	LeChatelierE_2013__MH0316__bin.75	CIBIO	MAG	2727299	26	143807	43.15	98.66	0		0	0	11.21	16		GUT_GENOME000055	MGYG-HGUT-00018	Coprococcus eutactus	ERS328947	ERP003612	Denmark	Europe	ftp://ftp.ebi.ac.uk/pub/databases/metagenomics/mgnify_genomes/human-gut/v1.0/all_genomes/MGYG-HGUT-000/MGYG-HGUT-00018/genomes1/GUT_GENOME112377.gff.gz		1
GUT_GENOME112461	LeChatelierE_2013__MH0321__bin.7	CIBIO	MAG	2826850	50	92996	44.21	99.33	0		0	11.42	0	15		GUT_GENOME001379	MGYG-HGUT-00231	Coprococcus eutactus_A	ERS328949	ERP003612	Denmark	Europe	ftp://ftp.ebi.ac.uk/pub/databases/metagenomics/mgnify_genomes/human-gut/v1.0/all_genomes/MGYG-HGUT-002/MGYG-HGUT-00231/genomes2/GUT_GENOME112461.gff.gz		2
GUT_GENOME112532	LeChatelierE_2013__MH0403__bin.40	CIBIO	MAG	2903953	27	164665	44.03	99.33	0		0	25.11	5.78	18		GUT_GENOME001379	MGYG-HGUT-00231	Coprococcus eutactus_A	ERS328952	ERP003612	Denmark	Europe	ftp://ftp.ebi.ac.uk/pub/databases/metagenomics/mgnify_genomes/human-gut/v1.0/all_genomes/MGYG-HGUT-002/MGYG-HGUT-00231/genomes3/GUT_GENOME112532.gff.gz		2
GUT_GENOME112719	LeChatelierE_2013__MH0407__bin.99	CIBIO	MAG	2913090	38	149242	44.01	98.29	0		0	0	0	15		GUT_GENOME001379	MGYG-HGUT-00231	Coprococcus eutactus_A	ERS328956	ERP003612	Denmark	Europe	ftp://ftp.ebi.ac.uk/pub/databases/metagenomics/mgnify_genomes/human-gut/v1.0/all_genomes/MGYG-HGUT-002/MGYG-HGUT-00231/genomes1/GUT_GENOME112719.gff.gz		2
GUT_GENOME112732	LeChatelierE_2013__MH0408__bin.37	CIBIO	MAG	2808875	71	56620	43.1	97.96	0.34		0	0	0	13		GUT_GENOME000055	MGYG-HGUT-00018	Coprococcus eutactus	ERS328957	ERP003612	Denmark	Europe	ftp://ftp.ebi.ac.uk/pub/databases/metagenomics/mgnify_genomes/human-gut/v1.0/all_genomes/MGYG-HGUT-000/MGYG-HGUT-00018/genomes1/GUT_GENOME112732.gff.gz		1
GUT_GENOME112770	LeChatelierE_2013__MH0409__bin.17	CIBIO	MAG	2842110	20	295437	43.1	97.74	0		0	46.9	5.78	18		GUT_GENOME000055	MGYG-HGUT-00018	Coprococcus eutactus	ERS328958	ERP003612	Denmark	Europe	ftp://ftp.ebi.ac.uk/pub/databases/metagenomics/mgnify_genomes/human-gut/v1.0/all_genomes/MGYG-HGUT-000/MGYG-HGUT-00018/genomes1/GUT_GENOME112770.gff.gz		1
GUT_GENOME112850	LeChatelierE_2013__MH0411__bin.19	CIBIO	MAG	2961339	34	110438	43.94	99.33	0		0	0	11.21	16		GUT_GENOME001379	MGYG-HGUT-00231	Coprococcus eutactus_A	ERS328960	ERP003612	Denmark	Europe	ftp://ftp.ebi.ac.uk/pub/databases/metagenomics/mgnify_genomes/human-gut/v1.0/all_genomes/MGYG-HGUT-002/MGYG-HGUT-00231/genomes4/GUT_GENOME112850.gff.gz		2
GUT_GENOME112913	LeChatelierE_2013__MH0412__bin.65	CIBIO	MAG	3103913	29	174088	43.49	99.33	0.31		0	0	0	17		GUT_GENOME001379	MGYG-HGUT-00231	Coprococcus eutactus_A	ERS328961	ERP003612	Denmark	Europe	ftp://ftp.ebi.ac.uk/pub/databases/metagenomics/mgnify_genomes/human-gut/v1.0/all_genomes/MGYG-HGUT-002/MGYG-HGUT-00231/genomes2/GUT_GENOME112913.gff.gz		2
GUT_GENOME112936	LeChatelierE_2013__MH0413__bin.47	CIBIO	MAG	2975835	43	127218	43.89	99.33	0.06		0	0	0	18		GUT_GENOME001379	MGYG-HGUT-00231	Coprococcus eutactus_A	ERS328962	ERP003612	Denmark	Europe	ftp://ftp.ebi.ac.uk/pub/databases/metagenomics/mgnify_genomes/human-gut/v1.0/all_genomes/MGYG-HGUT-002/MGYG-HGUT-00231/genomes3/GUT_GENOME112936.gff.gz		2
GUT_GENOME113016	LeChatelierE_2013__MH0415__bin.63	CIBIO	MAG	2955411	40	113598	43.96	97.99	0		0	46.58	0	16		GUT_GENOME001379	MGYG-HGUT-00231	Coprococcus eutactus_A	ERS328964	ERP003612	Denmark	Europe	ftp://ftp.ebi.ac.uk/pub/databases/metagenomics/mgnify_genomes/human-gut/v1.0/all_genomes/MGYG-HGUT-002/MGYG-HGUT-00231/genomes3/GUT_GENOME113016.gff.gz		2
GUT_GENOME113100	LeChatelierE_2013__MH0417__bin.67	CIBIO	MAG	2914477	35	116748	42.83	98.41	0		0	0	0	16		GUT_GENOME000055	MGYG-HGUT-00018	Coprococcus eutactus	ERS328966	ERP003612	Denmark	Europe	ftp://ftp.ebi.ac.uk/pub/databases/metagenomics/mgnify_genomes/human-gut/v1.0/all_genomes/MGYG-HGUT-000/MGYG-HGUT-00018/genomes1/GUT_GENOME113100.gff.gz		1
GUT_GENOME113139	LeChatelierE_2013__MH0418__bin.70	CIBIO	MAG	2809368	21	244593	43.98	99.33	0		0	25.11	0	16		GUT_GENOME001379	MGYG-HGUT-00231	Coprococcus eutactus_A	ERS328967	ERP003612	Denmark	Europe	ftp://ftp.ebi.ac.uk/pub/databases/metagenomics/mgnify_genomes/human-gut/v1.0/all_genomes/MGYG-HGUT-002/MGYG-HGUT-00231/genomes2/GUT_GENOME113139.gff.gz		2
GUT_GENOME113215	LeChatelierE_2013__MH0421__bin.35	CIBIO	MAG	2248843	23	130298	41.89	96.64	0		0	0	11.38	17		GUT_GENOME140272	MGYG-HGUT-02289	Coprococcus sp000433075	ERS328970	ERP003612	Denmark	Europe	ftp://ftp.ebi.ac.uk/pub/databases/metagenomics/mgnify_genomes/human-gut/v1.0/all_genomes/MGYG-HGUT-022/MGYG-HGUT-02289/genomes1/GUT_GENOME113215.gff.gz		8
GUT_GENOME113282	LeChatelierE_2013__MH0422__bin.89	CIBIO	MAG	2971867	30	149708	42.64	97.99	0		0	0	20.1	17		GUT_GENOME105828	MGYG-HGUT-01745	Coprococcus sp.	ERS328971	ERP003612	Denmark	Europe	ftp://ftp.ebi.ac.uk/pub/databases/metagenomics/mgnify_genomes/human-gut/v1.0/all_genomes/MGYG-HGUT-017/MGYG-HGUT-01745/genomes1/GUT_GENOME113282.gff.gz		7
GUT_GENOME113294	LeChatelierE_2013__MH0423__bin.27	CIBIO	MAG	2843611	82	65636	44.3	96.64	0.67		0	0	0	18		GUT_GENOME001379	MGYG-HGUT-00231	Coprococcus eutactus_A	ERS328972	ERP003612	Denmark	Europe	ftp://ftp.ebi.ac.uk/pub/databases/metagenomics/mgnify_genomes/human-gut/v1.0/all_genomes/MGYG-HGUT-002/MGYG-HGUT-00231/genomes2/GUT_GENOME113294.gff.gz		2
GUT_GENOME113462	LeChatelierE_2013__MH0428__bin.46	CIBIO	MAG	2892878	29	164936	42.62	98.99	0		0	0	0	18		GUT_GENOME105828	MGYG-HGUT-01745	Coprococcus sp.	ERS328977	ERP003612	Denmark	Europe	ftp://ftp.ebi.ac.uk/pub/databases/metagenomics/mgnify_genomes/human-gut/v1.0/all_genomes/MGYG-HGUT-017/MGYG-HGUT-01745/genomes1/GUT_GENOME113462.gff.gz		7
GUT_GENOME113792	LeChatelierE_2013__MH0436__bin.63	CIBIO	MAG	2821896	26	148684	43.97	97.99	0		0	46.9	11.21	17		GUT_GENOME001379	MGYG-HGUT-00231	Coprococcus eutactus_A	ERS328985	ERP003612	Denmark	Europe	ftp://ftp.ebi.ac.uk/pub/databases/metagenomics/mgnify_genomes/human-gut/v1.0/all_genomes/MGYG-HGUT-002/MGYG-HGUT-00231/genomes2/GUT_GENOME113792.gff.gz		2
GUT_GENOME113805	LeChatelierE_2013__MH0437__bin.116	CIBIO	MAG	2577813	37	113080	41.16	99.33	0		0	0	0	15		GUT_GENOME001027	MGYG-HGUT-00189	Coprococcus sp000154245	ERS328986	ERP003612	Denmark	Europe	ftp://ftp.ebi.ac.uk/pub/databases/metagenomics/mgnify_genomes/human-gut/v1.0/all_genomes/MGYG-HGUT-001/MGYG-HGUT-00189/genomes1/GUT_GENOME113805.gff.gz		5
GUT_GENOME113876	LeChatelierE_2013__MH0438__bin.52	CIBIO	MAG	2971786	30	138917	43.91	99.33	0		0	46.9	0	18		GUT_GENOME001379	MGYG-HGUT-00231	Coprococcus eutactus_A	ERS328987	ERP003612	Denmark	Europe	ftp://ftp.ebi.ac.uk/pub/databases/metagenomics/mgnify_genomes/human-gut/v1.0/all_genomes/MGYG-HGUT-002/MGYG-HGUT-00231/genomes3/GUT_GENOME113876.gff.gz		2
GUT_GENOME114065	LeChatelierE_2013__MH0442__bin.95	CIBIO	MAG	2910884	23	289857	44	99.33	0		0	0	11.21	16		GUT_GENOME001379	MGYG-HGUT-00231	Coprococcus eutactus_A	ERS328991	ERP003612	Denmark	Europe	ftp://ftp.ebi.ac.uk/pub/databases/metagenomics/mgnify_genomes/human-gut/v1.0/all_genomes/MGYG-HGUT-002/MGYG-HGUT-00231/genomes2/GUT_GENOME114065.gff.gz		2
GUT_GENOME114098	LeChatelierE_2013__MH0443__bin.74	CIBIO	MAG	2902212	22	234358	44.01	99.33	0		0	24.27	0	18		GUT_GENOME001379	MGYG-HGUT-00231	Coprococcus eutactus_A	ERS328992	ERP003612	Denmark	Europe	ftp://ftp.ebi.ac.uk/pub/databases/metagenomics/mgnify_genomes/human-gut/v1.0/all_genomes/MGYG-HGUT-002/MGYG-HGUT-00231/genomes2/GUT_GENOME114098.gff.gz		2
GUT_GENOME114128	LeChatelierE_2013__MH0445__bin.17	CIBIO	MAG	2637688	29	148881	41.29	99.33	0		0	0	5.78	19		GUT_GENOME001027	MGYG-HGUT-00189	Coprococcus sp900066115	ERS328994	ERP003612	Denmark	Europe	ftp://ftp.ebi.ac.uk/pub/databases/metagenomics/mgnify_genomes/human-gut/v1.0/all_genomes/MGYG-HGUT-001/MGYG-HGUT-00189/genomes2/GUT_GENOME114128.gff.gz		4
GUT_GENOME114423	LeChatelierE_2013__MH0451__bin.81	CIBIO	MAG	2580749	39	104150	41.43	99.33	0		0	0	0	15		GUT_GENOME001027	MGYG-HGUT-00189	Coprococcus sp900066115	ERS328999	ERP003612	Denmark	Europe	ftp://ftp.ebi.ac.uk/pub/databases/metagenomics/mgnify_genomes/human-gut/v1.0/all_genomes/MGYG-HGUT-001/MGYG-HGUT-00189/genomes1/GUT_GENOME114423.gff.gz		4
GUT_GENOME114656	LeChatelierE_2013__MH0457__bin.61	CIBIO	MAG	2861485	40	126944	44.05	97.99	0		0	0	5.37	17		GUT_GENOME001379	MGYG-HGUT-00231	Coprococcus eutactus_A	ERS329005	ERP003612	Denmark	Europe	ftp://ftp.ebi.ac.uk/pub/databases/metagenomics/mgnify_genomes/human-gut/v1.0/all_genomes/MGYG-HGUT-002/MGYG-HGUT-00231/genomes2/GUT_GENOME114656.gff.gz		2
GUT_GENOME114896	LiJ_2014__MH0234__bin.41	CIBIO	MAG	2837711	30	202879	44.2	98.07	0		0	25.38	5.37	17		GUT_GENOME001379	MGYG-HGUT-00231	Coprococcus eutactus_A	ERS396296	ERP004605	Denmark	Europe	ftp://ftp.ebi.ac.uk/pub/databases/metagenomics/mgnify_genomes/human-gut/v1.0/all_genomes/MGYG-HGUT-002/MGYG-HGUT-00231/genomes1/GUT_GENOME114896.gff.gz		2
GUT_GENOME115105	LiJ_2014__MH0260__bin.45	CIBIO	MAG	2354958	24	114949	41.91	97.99	0		0	0	11.21	15		GUT_GENOME140272	MGYG-HGUT-02289	Coprococcus sp000433075	ERS396302	ERP004605	Denmark	Europe	ftp://ftp.ebi.ac.uk/pub/databases/metagenomics/mgnify_genomes/human-gut/v1.0/all_genomes/MGYG-HGUT-022/MGYG-HGUT-02289/genomes1/GUT_GENOME115105.gff.gz		8
GUT_GENOME115307	LiJ_2014__MH0270__bin.31	CIBIO	MAG	2871719	38	131692	42.96	97.65	0.11		0	63.34	0	15		GUT_GENOME000055	MGYG-HGUT-00018	Coprococcus eutactus	ERS396309	ERP004605	Denmark	Europe	ftp://ftp.ebi.ac.uk/pub/databases/metagenomics/mgnify_genomes/human-gut/v1.0/all_genomes/MGYG-HGUT-000/MGYG-HGUT-00018/genomes1/GUT_GENOME115307.gff.gz		1
GUT_GENOME115352	LiJ_2014__MH0271__bin.49	CIBIO	MAG	2670769	30	143673	41.26	99.33	0		0	17.68	0	14		GUT_GENOME001027	MGYG-HGUT-00189	Coprococcus sp900066115	ERS396310	ERP004605	Denmark	Europe	ftp://ftp.ebi.ac.uk/pub/databases/metagenomics/mgnify_genomes/human-gut/v1.0/all_genomes/MGYG-HGUT-001/MGYG-HGUT-00189/genomes1/GUT_GENOME115352.gff.gz		4
GUT_GENOME115704	LiJ_2014__MH0308__bin.30	CIBIO	MAG	2928188	30	172881	43.82	99.33	0		0	0	0	15		GUT_GENOME001379	MGYG-HGUT-00231	Coprococcus eutactus_A	ERS396322	ERP004605	Denmark	Europe	ftp://ftp.ebi.ac.uk/pub/databases/metagenomics/mgnify_genomes/human-gut/v1.0/all_genomes/MGYG-HGUT-002/MGYG-HGUT-00231/genomes1/GUT_GENOME115704.gff.gz		2
GUT_GENOME115859	LiJ_2014__MH0315__bin.47	CIBIO	MAG	2744938	106	41835	44.27	97.88	0.84		0	11.55	0	15		GUT_GENOME001379	MGYG-HGUT-00231	Coprococcus eutactus_A	ERS396327	ERP004605	Denmark	Europe	ftp://ftp.ebi.ac.uk/pub/databases/metagenomics/mgnify_genomes/human-gut/v1.0/all_genomes/MGYG-HGUT-002/MGYG-HGUT-00231/genomes2/GUT_GENOME115859.gff.gz		2
GUT_GENOME116176	LiJ_2014__MH0334__bin.28	CIBIO	MAG	2841650	31	175050	44	97.89	0		0	0	14.53	17		GUT_GENOME001379	MGYG-HGUT-00231	Coprococcus eutactus_A	ERS396337	ERP004605	Denmark	Europe	ftp://ftp.ebi.ac.uk/pub/databases/metagenomics/mgnify_genomes/human-gut/v1.0/all_genomes/MGYG-HGUT-002/MGYG-HGUT-00231/genomes2/GUT_GENOME116176.gff.gz		2
GUT_GENOME116467	LiJ_2014__MH0345__bin.67	CIBIO	MAG	2856953	72	54869	42.81	99.02	0		0	16.31	0	16		GUT_GENOME105828	MGYG-HGUT-01745	Coprococcus sp.	ERS396347	ERP004605	Denmark	Europe	ftp://ftp.ebi.ac.uk/pub/databases/metagenomics/mgnify_genomes/human-gut/v1.0/all_genomes/MGYG-HGUT-017/MGYG-HGUT-01745/genomes1/GUT_GENOME116467.gff.gz		7
GUT_GENOME116561	LiJ_2014__MH0349__bin.24	CIBIO	MAG	2558769	49	79955	41.06	98.66	0		0	0	0	16		GUT_GENOME001027	MGYG-HGUT-00189	Coprococcus sp000154245	ERS396351	ERP004605	Denmark	Europe	ftp://ftp.ebi.ac.uk/pub/databases/metagenomics/mgnify_genomes/human-gut/v1.0/all_genomes/MGYG-HGUT-001/MGYG-HGUT-00189/genomes1/GUT_GENOME116561.gff.gz		5
GUT_GENOME116950	LiJ_2014__MH0363__bin.55	CIBIO	MAG	2945225	36	210367	43.85	98.54	0		0	47.1	8.82	19		GUT_GENOME001379	MGYG-HGUT-00231	Coprococcus eutactus_A	ERS396363	ERP004605	Denmark	Europe	ftp://ftp.ebi.ac.uk/pub/databases/metagenomics/mgnify_genomes/human-gut/v1.0/all_genomes/MGYG-HGUT-002/MGYG-HGUT-00231/genomes3/GUT_GENOME116950.gff.gz		2
GUT_GENOME117028	LiJ_2014__MH0366__bin.28	CIBIO	MAG	2748538	101	43170	44.2	98.43	0.17		0	0	0	15		GUT_GENOME001379	MGYG-HGUT-00231	Coprococcus eutactus_A	ERS396366	ERP004605	Denmark	Europe	ftp://ftp.ebi.ac.uk/pub/databases/metagenomics/mgnify_genomes/human-gut/v1.0/all_genomes/MGYG-HGUT-002/MGYG-HGUT-00231/genomes1/GUT_GENOME117028.gff.gz		2
GUT_GENOME117100	LiJ_2014__MH0368__bin.44	CIBIO	MAG	2995093	25	177664	43.83	99.33	0		0	71.82	0	17		GUT_GENOME001379	MGYG-HGUT-00231	Coprococcus eutactus_A	ERS396368	ERP004605	Denmark	Europe	ftp://ftp.ebi.ac.uk/pub/databases/metagenomics/mgnify_genomes/human-gut/v1.0/all_genomes/MGYG-HGUT-002/MGYG-HGUT-00231/genomes3/GUT_GENOME117100.gff.gz		2
GUT_GENOME117131	LiJ_2014__MH0369__bin.52	CIBIO	MAG	2671467	34	153458	43.08	96.64	0		0	0	0	16		GUT_GENOME000055	MGYG-HGUT-00018	Coprococcus eutactus	ERS396369	ERP004605	Denmark	Europe	ftp://ftp.ebi.ac.uk/pub/databases/metagenomics/mgnify_genomes/human-gut/v1.0/all_genomes/MGYG-HGUT-000/MGYG-HGUT-00018/genomes1/GUT_GENOME117131.gff.gz		1
GUT_GENOME117216	LiJ_2014__MH0372__bin.27	CIBIO	MAG	2564922	36	116108	41.33	99.33	0		0	0	0	18		GUT_GENOME001027	MGYG-HGUT-00189	Coprococcus sp900066115	ERS396372	ERP004605	Denmark	Europe	ftp://ftp.ebi.ac.uk/pub/databases/metagenomics/mgnify_genomes/human-gut/v1.0/all_genomes/MGYG-HGUT-001/MGYG-HGUT-00189/genomes1/GUT_GENOME117216.gff.gz		4
GUT_GENOME117486	LiJ_2014__MH0379__bin.8	CIBIO	MAG	2524699	33	129633	41.2	98.66	0		0	0	0	17		GUT_GENOME001027	MGYG-HGUT-00189	Coprococcus sp000154245	ERS396379	ERP004605	Denmark	Europe	ftp://ftp.ebi.ac.uk/pub/databases/metagenomics/mgnify_genomes/human-gut/v1.0/all_genomes/MGYG-HGUT-001/MGYG-HGUT-00189/genomes1/GUT_GENOME117486.gff.gz		5
GUT_GENOME117489	LiJ_2014__MH0381__bin.15	CIBIO	MAG	2485725	42	92893	41.2	97.99	0.02		0	0	0	15		GUT_GENOME001027	MGYG-HGUT-00189	Coprococcus sp000154245	ERS396380	ERP004605	Denmark	Europe	ftp://ftp.ebi.ac.uk/pub/databases/metagenomics/mgnify_genomes/human-gut/v1.0/all_genomes/MGYG-HGUT-001/MGYG-HGUT-00189/genomes1/GUT_GENOME117489.gff.gz		5
GUT_GENOME117558	LiJ_2014__MH0383__bin.31	CIBIO	MAG	2915542	18	259736	43.97	99.33	0		0	0	0	17		GUT_GENOME001379	MGYG-HGUT-00231	Coprococcus eutactus_A	ERS396382	ERP004605	Denmark	Europe	ftp://ftp.ebi.ac.uk/pub/databases/metagenomics/mgnify_genomes/human-gut/v1.0/all_genomes/MGYG-HGUT-002/MGYG-HGUT-00231/genomes3/GUT_GENOME117558.gff.gz		2
GUT_GENOME117994	LiJ_2014__MH0396__bin.21	CIBIO	MAG	2872225	40	112986	44.16	98.54	0		0	0	5.44	16		GUT_GENOME001379	MGYG-HGUT-00231	Coprococcus eutactus_A	ERS396395	ERP004605	Denmark	Europe	ftp://ftp.ebi.ac.uk/pub/databases/metagenomics/mgnify_genomes/human-gut/v1.0/all_genomes/MGYG-HGUT-002/MGYG-HGUT-00231/genomes3/GUT_GENOME117994.gff.gz		2
GUT_GENOME118048	LiJ_2014__MH0397__bin.65	CIBIO	MAG	2628842	31	249039	41.19	95.3	0.67		0	0	0	16		GUT_GENOME001027	MGYG-HGUT-00189	Coprococcus sp900066115	ERS396396	ERP004605	Denmark	Europe	ftp://ftp.ebi.ac.uk/pub/databases/metagenomics/mgnify_genomes/human-gut/v1.0/all_genomes/MGYG-HGUT-001/MGYG-HGUT-00189/genomes2/GUT_GENOME118048.gff.gz		4
GUT_GENOME118068	LiJ_2014__MH0398__bin.38	CIBIO	MAG	2616405	118	37308	44.53	98.37	0		0	0	5.4	13		GUT_GENOME001379	MGYG-HGUT-00231	Coprococcus eutactus_A	ERS396397	ERP004605	Denmark	Europe	ftp://ftp.ebi.ac.uk/pub/databases/metagenomics/mgnify_genomes/human-gut/v1.0/all_genomes/MGYG-HGUT-002/MGYG-HGUT-00231/genomes1/GUT_GENOME118068.gff.gz		2
GUT_GENOME118752	LiJ_2014__O2.UC21-1__bin.24	CIBIO	MAG	2846191	30	120494	44.09	99.33	0		0	0	0	18		GUT_GENOME001379	MGYG-HGUT-00231	Coprococcus eutactus_A	ERS396421	ERP004605	Spain	Europe	ftp://ftp.ebi.ac.uk/pub/databases/metagenomics/mgnify_genomes/human-gut/v1.0/all_genomes/MGYG-HGUT-002/MGYG-HGUT-00231/genomes3/GUT_GENOME118752.gff.gz		2
GUT_GENOME118784	LiJ_2014__O2.UC2-1__bin.25	CIBIO	MAG	2765171	91	45765	44.33	98.52	0		0	0	0	11		GUT_GENOME001379	MGYG-HGUT-00231	Coprococcus eutactus_A	ERS396420	ERP004605	Spain	Europe	ftp://ftp.ebi.ac.uk/pub/databases/metagenomics/mgnify_genomes/human-gut/v1.0/all_genomes/MGYG-HGUT-002/MGYG-HGUT-00231/genomes1/GUT_GENOME118784.gff.gz		2
GUT_GENOME119387	LiJ_2014__O2.UC4-1__bin.66	CIBIO	MAG	2871793	24	226557	42.93	99.33	0		0	0	36.31	17		GUT_GENOME000055	MGYG-HGUT-00018	Coprococcus eutactus	ERS396441	ERP004605	Spain	Europe	ftp://ftp.ebi.ac.uk/pub/databases/metagenomics/mgnify_genomes/human-gut/v1.0/all_genomes/MGYG-HGUT-000/MGYG-HGUT-00018/genomes1/GUT_GENOME119387.gff.gz		1
GUT_GENOME119993	LiJ_2014__V1.CD2-0-PN__bin.27	CIBIO	MAG	2540063	58	68432	42.81	98.45	0		0	0	5.88	18		GUT_GENOME095993	MGYG-HGUT-01315	Coprococcus comes	ERS396463	ERP004605	Spain	Europe	ftp://ftp.ebi.ac.uk/pub/databases/metagenomics/mgnify_genomes/human-gut/v1.0/all_genomes/MGYG-HGUT-013/MGYG-HGUT-01315/genomes1/GUT_GENOME119993.gff.gz		3
GUT_GENOME120648	LiJ_2014__V1.CD6-0-PN__bin.67	CIBIO	MAG	2678985	27	146593	41	99.33	0		0	0	0	14		GUT_GENOME001027	MGYG-HGUT-00189	Coprococcus sp000154245	ERS396488	ERP004605	Spain	Europe	ftp://ftp.ebi.ac.uk/pub/databases/metagenomics/mgnify_genomes/human-gut/v1.0/all_genomes/MGYG-HGUT-001/MGYG-HGUT-00189/genomes1/GUT_GENOME120648.gff.gz		5
GUT_GENOME121018	LiJ_2014__V1.FI07__bin.5	CIBIO	MAG	2645561	35	115666	41.03	99.33	0		0	0	10.74	18		GUT_GENOME001027	MGYG-HGUT-00189	Coprococcus sp000154245	ERS396498	ERP004605	Spain	Europe	ftp://ftp.ebi.ac.uk/pub/databases/metagenomics/mgnify_genomes/human-gut/v1.0/all_genomes/MGYG-HGUT-001/MGYG-HGUT-00189/genomes1/GUT_GENOME121018.gff.gz		5
GUT_GENOME121633	LiJ_2014__V1.FI24__bin.23	CIBIO	MAG	3011134	29	224439	43.98	98.29	0		0	0	0	18		GUT_GENOME001379	MGYG-HGUT-00231	Coprococcus eutactus_A	ERS396515	ERP004605	Spain	Europe	ftp://ftp.ebi.ac.uk/pub/databases/metagenomics/mgnify_genomes/human-gut/v1.0/all_genomes/MGYG-HGUT-002/MGYG-HGUT-00231/genomes1/GUT_GENOME121633.gff.gz		2
GUT_GENOME121785	LiJ_2014__V1.FI27__bin.78	CIBIO	MAG	2945866	23	173231	44.03	99.33	0		0	0	10.74	17		GUT_GENOME001379	MGYG-HGUT-00231	Coprococcus eutactus_A	ERS396518	ERP004605	Spain	Europe	ftp://ftp.ebi.ac.uk/pub/databases/metagenomics/mgnify_genomes/human-gut/v1.0/all_genomes/MGYG-HGUT-002/MGYG-HGUT-00231/genomes3/GUT_GENOME121785.gff.gz		2
GUT_GENOME121919	LiJ_2014__V1.FI31__bin.60	CIBIO	MAG	2945432	26	234057	43.92	99.33	0.34		0	64.19	0	19		GUT_GENOME001379	MGYG-HGUT-00231	Coprococcus eutactus_A	ERS396522	ERP004605	Spain	Europe	ftp://ftp.ebi.ac.uk/pub/databases/metagenomics/mgnify_genomes/human-gut/v1.0/all_genomes/MGYG-HGUT-002/MGYG-HGUT-00231/genomes1/GUT_GENOME121919.gff.gz		2
GUT_GENOME122238	LiJ_2014__V1.UC40-1__bin.67	CIBIO	MAG	2685942	33	184260	41.42	99.33	0		0	0	14.53	17		GUT_GENOME001027	MGYG-HGUT-00189	Coprococcus sp900066115	ERS396532	ERP004605	Spain	Europe	ftp://ftp.ebi.ac.uk/pub/databases/metagenomics/mgnify_genomes/human-gut/v1.0/all_genomes/MGYG-HGUT-001/MGYG-HGUT-00189/genomes1/GUT_GENOME122238.gff.gz		4
GUT_GENOME122557	LiJ_2017__H1F613739__bin.57	CIBIO	MAG	2372559	79	49769	42.07	98.66	0		0	0	0	17		GUT_GENOME140272	MGYG-HGUT-02289	Coprococcus sp000433075	ERS1138819	ERP015450	China	Asia	ftp://ftp.ebi.ac.uk/pub/databases/metagenomics/mgnify_genomes/human-gut/v1.0/all_genomes/MGYG-HGUT-022/MGYG-HGUT-02289/genomes1/GUT_GENOME122557.gff.gz		8
GUT_GENOME123955	LiJ_2017__H2M614904__bin.9	CIBIO	MAG	2695890	39	102912	40.84	99.33	0.43		0	0	37.13	17		GUT_GENOME001027	MGYG-HGUT-00189	Coprococcus sp900066115	ERS1138840	ERP015450	China	Asia	ftp://ftp.ebi.ac.uk/pub/databases/metagenomics/mgnify_genomes/human-gut/v1.0/all_genomes/MGYG-HGUT-001/MGYG-HGUT-00189/genomes1/GUT_GENOME123955.gff.gz		4
GUT_GENOME124318	LiJ_2017__H3M515137__bin.29	CIBIO	MAG	2680568	53	84646	44.53	97.32	0		0	46.25	0	19		GUT_GENOME001379	MGYG-HGUT-00231	Coprococcus eutactus_A	ERS1138884	ERP015450	China	Asia	ftp://ftp.ebi.ac.uk/pub/databases/metagenomics/mgnify_genomes/human-gut/v1.0/all_genomes/MGYG-HGUT-002/MGYG-HGUT-00231/genomes2/GUT_GENOME124318.gff.gz		2
GUT_GENOME126116	LiSS_2016__FAT_012-22-42-0__bin.17	CIBIO	MAG	2282707	42	93581	41.96	98.51	0		0	18.66	11.21	14		GUT_GENOME140272	MGYG-HGUT-02289	Coprococcus sp000433075	ERS1069655	ERP013827	Netherlands	Europe	ftp://ftp.ebi.ac.uk/pub/databases/metagenomics/mgnify_genomes/human-gut/v1.0/all_genomes/MGYG-HGUT-022/MGYG-HGUT-02289/genomes1/GUT_GENOME126116.gff.gz		8
GUT_GENOME126276	LiSS_2016__FAT_014-22-84-0__bin.2	CIBIO	MAG	2990786	30	179976	43.99	99.33	0.17		0	0	0	13		GUT_GENOME001379	MGYG-HGUT-00231	Coprococcus eutactus_A	ERS1069661	ERP013827	Netherlands	Europe	ftp://ftp.ebi.ac.uk/pub/databases/metagenomics/mgnify_genomes/human-gut/v1.0/all_genomes/MGYG-HGUT-002/MGYG-HGUT-00231/genomes3/GUT_GENOME126276.gff.gz		2
GUT_GENOME126439	LiSS_2016__FAT_017-22-14-0__bin.12	CIBIO	MAG	2940159	26	229452	44.04	99.33	0.67		0	0	0	15		GUT_GENOME001379	MGYG-HGUT-00231	Coprococcus eutactus_A	ERS1069668	ERP013827	Netherlands	Europe	ftp://ftp.ebi.ac.uk/pub/databases/metagenomics/mgnify_genomes/human-gut/v1.0/all_genomes/MGYG-HGUT-002/MGYG-HGUT-00231/genomes3/GUT_GENOME126439.gff.gz		2
GUT_GENOME126973	LiSS_2016__FAT_DON_8-22-0-0__bin.47	CIBIO	MAG	2602897	44	80418	41.03	99.33	0		0	0	0	16		GUT_GENOME001027	MGYG-HGUT-00189	Coprococcus sp000154245	ERS1069691	ERP013827	Netherlands	Europe	ftp://ftp.ebi.ac.uk/pub/databases/metagenomics/mgnify_genomes/human-gut/v1.0/all_genomes/MGYG-HGUT-001/MGYG-HGUT-00189/genomes1/GUT_GENOME126973.gff.gz		5
GUT_GENOME129640	LiuW_2016__SRR3993060__bin.48	CIBIO	MAG	2257849	103	35443	42.12	97.42	0		0	0	0	10		GUT_GENOME140272	MGYG-HGUT-02289	Coprococcus sp000433075	SRS1596873	SRP080787	Mongolia	Asia	ftp://ftp.ebi.ac.uk/pub/databases/metagenomics/mgnify_genomes/human-gut/v1.0/all_genomes/MGYG-HGUT-022/MGYG-HGUT-02289/genomes1/GUT_GENOME129640.gff.gz		8
GUT_GENOME129708	LiuW_2016__SRR3993061__bin.93	CIBIO	MAG	2738435	195	21664	43.49	97.71	0.67		0	19.44	0	14		GUT_GENOME000055	MGYG-HGUT-00018	Coprococcus eutactus	SRS1596874	SRP080787	Mongolia	Asia	ftp://ftp.ebi.ac.uk/pub/databases/metagenomics/mgnify_genomes/human-gut/v1.0/all_genomes/MGYG-HGUT-000/MGYG-HGUT-00018/genomes1/GUT_GENOME129708.gff.gz		1
GUT_GENOME130260	LoombaR_2017__SID1035_bai__bin.7	CIBIO	MAG	2671629	56	74314	42.38	98.83	0		0	0	0	18		GUT_GENOME095993	MGYG-HGUT-01315	Coprococcus comes	SRS1993588	SRP100446	United States	North America	ftp://ftp.ebi.ac.uk/pub/databases/metagenomics/mgnify_genomes/human-gut/v1.0/all_genomes/MGYG-HGUT-013/MGYG-HGUT-01315/genomes1/GUT_GENOME130260.gff.gz		3
GUT_GENOME130700	LoombaR_2017__SID5468_vbl__bin.17	CIBIO	MAG	2617695	100	34930	44.56	97.32	0.34		0	0	14.53	17		GUT_GENOME001379	MGYG-HGUT-00231	Coprococcus eutactus_A	SRS1993554	SRP100446	United States	North America	ftp://ftp.ebi.ac.uk/pub/databases/metagenomics/mgnify_genomes/human-gut/v1.0/all_genomes/MGYG-HGUT-002/MGYG-HGUT-00231/genomes3/GUT_GENOME130700.gff.gz		2
GUT_GENOME130723	LoombaR_2017__SID5473_irg__bin.30	CIBIO	MAG	2789081	28	134397	44.23	98.66	0		0	0	0	17		GUT_GENOME001379	MGYG-HGUT-00231	Coprococcus eutactus_A	SRS1993553	SRP100446	United States	North America	ftp://ftp.ebi.ac.uk/pub/databases/metagenomics/mgnify_genomes/human-gut/v1.0/all_genomes/MGYG-HGUT-002/MGYG-HGUT-00231/genomes3/GUT_GENOME130723.gff.gz		2
GUT_GENOME130864	LoombaR_2017__SID5566_wwo__bin.3	CIBIO	MAG	2927738	32	138707	44.12	99.33	0		0	0	0	19		GUT_GENOME001379	MGYG-HGUT-00231	Coprococcus eutactus_A	SRS1993544	SRP100446	United States	North America	ftp://ftp.ebi.ac.uk/pub/databases/metagenomics/mgnify_genomes/human-gut/v1.0/all_genomes/MGYG-HGUT-002/MGYG-HGUT-00231/genomes3/GUT_GENOME130864.gff.gz		2
GUT_GENOME130917	LoombaR_2017__SID5574_yeb__bin.28	CIBIO	MAG	2551594	50	76690	41.48	98.93	0		0	0	0	15		GUT_GENOME001027	MGYG-HGUT-00189	Coprococcus sp900066115	SRS1993540	SRP100446	United States	North America	ftp://ftp.ebi.ac.uk/pub/databases/metagenomics/mgnify_genomes/human-gut/v1.0/all_genomes/MGYG-HGUT-001/MGYG-HGUT-00189/genomes2/GUT_GENOME130917.gff.gz		4
GUT_GENOME131552	LouisS_2016__AS56_6__bin.5	CIBIO	MAG	3054356	24	195219	43.91	99.33	0		0	70.65	10.29	17		GUT_GENOME001379	MGYG-HGUT-00231	Coprococcus eutactus_A	SRS1028287		Germany	Europe	ftp://ftp.ebi.ac.uk/pub/databases/metagenomics/mgnify_genomes/human-gut/v1.0/all_genomes/MGYG-HGUT-002/MGYG-HGUT-00231/genomes3/GUT_GENOME131552.gff.gz		2
GUT_GENOME132920	NielsenHB_2014__MH0090__bin.4	CIBIO	MAG	2581145	76	50584	41.01	96.52	0.67		0	0	0	13		GUT_GENOME001027	MGYG-HGUT-00189	Coprococcus sp000154245	ERS199088	ERP002061	Denmark	Europe	ftp://ftp.ebi.ac.uk/pub/databases/metagenomics/mgnify_genomes/human-gut/v1.0/all_genomes/MGYG-HGUT-001/MGYG-HGUT-00189/genomes1/GUT_GENOME132920.gff.gz		5
GUT_GENOME133064	NielsenHB_2014__MH0098__bin.30	CIBIO	MAG	2634949	65	58164	41.07	98.3	0.34		0	0	0	15		GUT_GENOME001027	MGYG-HGUT-00189	Coprococcus sp000154245	ERS199096	ERP002061	Denmark	Europe	ftp://ftp.ebi.ac.uk/pub/databases/metagenomics/mgnify_genomes/human-gut/v1.0/all_genomes/MGYG-HGUT-001/MGYG-HGUT-00189/genomes1/GUT_GENOME133064.gff.gz		5
GUT_GENOME133088	NielsenHB_2014__MH0099__bin.35	CIBIO	MAG	2806570	71	56419	44.05	96.73	0		0	0	0	12		GUT_GENOME001379	MGYG-HGUT-00231	Coprococcus eutactus_A	ERS199097	ERP002061	Denmark	Europe	ftp://ftp.ebi.ac.uk/pub/databases/metagenomics/mgnify_genomes/human-gut/v1.0/all_genomes/MGYG-HGUT-002/MGYG-HGUT-00231/genomes2/GUT_GENOME133088.gff.gz		2
GUT_GENOME133109	NielsenHB_2014__MH0100__bin.35	CIBIO	MAG	2645023	50	98995	41.34	99.33	0.02		0	0	5.61	16		GUT_GENOME001027	MGYG-HGUT-00189	Coprococcus sp900066115	ERS199098	ERP002061	Denmark	Europe	ftp://ftp.ebi.ac.uk/pub/databases/metagenomics/mgnify_genomes/human-gut/v1.0/all_genomes/MGYG-HGUT-001/MGYG-HGUT-00189/genomes2/GUT_GENOME133109.gff.gz		4
GUT_GENOME133197	NielsenHB_2014__MH0105__bin.4	CIBIO	MAG	2760441	81	45282	44.22	98.66	0.67		0	18.26	0	16		GUT_GENOME001379	MGYG-HGUT-00231	Coprococcus eutactus_A	ERS199103	ERP002061	Denmark	Europe	ftp://ftp.ebi.ac.uk/pub/databases/metagenomics/mgnify_genomes/human-gut/v1.0/all_genomes/MGYG-HGUT-002/MGYG-HGUT-00231/genomes3/GUT_GENOME133197.gff.gz		2
GUT_GENOME133686	NielsenHB_2014__MH0137__bin.29	CIBIO	MAG	2938535	22	236918	43.97	99.33	0		0	0	38.5	17		GUT_GENOME001379	MGYG-HGUT-00231	Coprococcus eutactus_A	ERS199131	ERP002061	Denmark	Europe	ftp://ftp.ebi.ac.uk/pub/databases/metagenomics/mgnify_genomes/human-gut/v1.0/all_genomes/MGYG-HGUT-002/MGYG-HGUT-00231/genomes1/GUT_GENOME133686.gff.gz		2
GUT_GENOME133865	NielsenHB_2014__MH0145__bin.20	CIBIO	MAG	2831087	27	179103	44.08	99.33	0		0	0	0	16		GUT_GENOME001379	MGYG-HGUT-00231	Coprococcus eutactus_A	ERS199139	ERP002061	Denmark	Europe	ftp://ftp.ebi.ac.uk/pub/databases/metagenomics/mgnify_genomes/human-gut/v1.0/all_genomes/MGYG-HGUT-002/MGYG-HGUT-00231/genomes2/GUT_GENOME133865.gff.gz		2
GUT_GENOME133938	NielsenHB_2014__MH0148__bin.32	CIBIO	MAG	2916740	42	125944	43.98	98.54	0		0	0	0	13		GUT_GENOME001379	MGYG-HGUT-00231	Coprococcus eutactus_A	ERS199142	ERP002061	Denmark	Europe	ftp://ftp.ebi.ac.uk/pub/databases/metagenomics/mgnify_genomes/human-gut/v1.0/all_genomes/MGYG-HGUT-002/MGYG-HGUT-00231/genomes1/GUT_GENOME133938.gff.gz		2
GUT_GENOME134129	NielsenHB_2014__MH0159__bin.30	CIBIO	MAG	2549869	26	126559	41.23	97.99	0.67		0	0	0	17		GUT_GENOME001027	MGYG-HGUT-00189	Coprococcus sp900066115	ERS199152	ERP002061	Denmark	Europe	ftp://ftp.ebi.ac.uk/pub/databases/metagenomics/mgnify_genomes/human-gut/v1.0/all_genomes/MGYG-HGUT-001/MGYG-HGUT-00189/genomes1/GUT_GENOME134129.gff.gz		4
GUT_GENOME134156	NielsenHB_2014__MH0160__bin.36	CIBIO	MAG	2654862	48	100055	44.33	97.32	0.17		0	0	0	14		GUT_GENOME001379	MGYG-HGUT-00231	Coprococcus eutactus_A	ERS199153	ERP002061	Denmark	Europe	ftp://ftp.ebi.ac.uk/pub/databases/metagenomics/mgnify_genomes/human-gut/v1.0/all_genomes/MGYG-HGUT-002/MGYG-HGUT-00231/genomes3/GUT_GENOME134156.gff.gz		2
GUT_GENOME134173	NielsenHB_2014__MH0162__bin.40	CIBIO	MAG	2633025	45	90083	41.1	98.54	0		0	46.9	11.21	18		GUT_GENOME001027	MGYG-HGUT-00189	Coprococcus sp000154245	ERS199154	ERP002061	Denmark	Europe	ftp://ftp.ebi.ac.uk/pub/databases/metagenomics/mgnify_genomes/human-gut/v1.0/all_genomes/MGYG-HGUT-001/MGYG-HGUT-00189/genomes1/GUT_GENOME134173.gff.gz		5
GUT_GENOME134311	NielsenHB_2014__MH0172__bin.20	CIBIO	MAG	2545415	54	90289	41.38	97.86	0.67		0	19.5	0	14		GUT_GENOME001027	MGYG-HGUT-00189	Coprococcus sp900066115	ERS199163	ERP002061	Denmark	Europe	ftp://ftp.ebi.ac.uk/pub/databases/metagenomics/mgnify_genomes/human-gut/v1.0/all_genomes/MGYG-HGUT-001/MGYG-HGUT-00189/genomes1/GUT_GENOME134311.gff.gz		4
GUT_GENOME134342	NielsenHB_2014__MH0174__bin.11	CIBIO	MAG	2522419	31	99729	41.45	98.66	0		0	18.66	0	16		GUT_GENOME001027	MGYG-HGUT-00189	Coprococcus sp900066115	ERS199165	ERP002061	Denmark	Europe	ftp://ftp.ebi.ac.uk/pub/databases/metagenomics/mgnify_genomes/human-gut/v1.0/all_genomes/MGYG-HGUT-001/MGYG-HGUT-00189/genomes1/GUT_GENOME134342.gff.gz		4
GUT_GENOME134499	NielsenHB_2014__MH0183__bin.3	CIBIO	MAG	2983204	32	130121	43.89	98.32	0		0	21.14	0	17		GUT_GENOME001379	MGYG-HGUT-00231	Coprococcus eutactus_A	ERS199173	ERP002061	Denmark	Europe	ftp://ftp.ebi.ac.uk/pub/databases/metagenomics/mgnify_genomes/human-gut/v1.0/all_genomes/MGYG-HGUT-002/MGYG-HGUT-00231/genomes3/GUT_GENOME134499.gff.gz		2
GUT_GENOME134528	NielsenHB_2014__MH0185__bin.21	CIBIO	MAG	2902440	28	166627	43.02	97.29	0		0	0	0	17		GUT_GENOME000055	MGYG-HGUT-00018	Coprococcus eutactus	ERS199175	ERP002061	Denmark	Europe	ftp://ftp.ebi.ac.uk/pub/databases/metagenomics/mgnify_genomes/human-gut/v1.0/all_genomes/MGYG-HGUT-000/MGYG-HGUT-00018/genomes1/GUT_GENOME134528.gff.gz		1
GUT_GENOME134641	NielsenHB_2014__O2_UC1_2__bin.41	CIBIO	MAG	2685204	49	99975	41.35	98.54	0		0	0	21.64	16		GUT_GENOME001027	MGYG-HGUT-00189	Coprococcus sp900066115	ERS199178	ERP002061	Spain	Europe	ftp://ftp.ebi.ac.uk/pub/databases/metagenomics/mgnify_genomes/human-gut/v1.0/all_genomes/MGYG-HGUT-001/MGYG-HGUT-00189/genomes2/GUT_GENOME134641.gff.gz		4
GUT_GENOME134726	NielsenHB_2014__O2_UC16_2__bin.11	CIBIO	MAG	2501626	48	78967	41.41	96.98	0		0	0	0	16		GUT_GENOME001027	MGYG-HGUT-00189	Coprococcus sp900066115	ERS199188	ERP002061	Spain	Europe	ftp://ftp.ebi.ac.uk/pub/databases/metagenomics/mgnify_genomes/human-gut/v1.0/all_genomes/MGYG-HGUT-001/MGYG-HGUT-00189/genomes2/GUT_GENOME134726.gff.gz		4
GUT_GENOME135134	NielsenHB_2014__O2_UC30_2__bin.17	CIBIO	MAG	2640886	67	75658	41.35	98.66	0		0	0	11.21	14		GUT_GENOME001027	MGYG-HGUT-00189	Coprococcus sp900066115	ERS199216	ERP002061	Spain	Europe	ftp://ftp.ebi.ac.uk/pub/databases/metagenomics/mgnify_genomes/human-gut/v1.0/all_genomes/MGYG-HGUT-001/MGYG-HGUT-00189/genomes1/GUT_GENOME135134.gff.gz		4
GUT_GENOME135187	NielsenHB_2014__O2_UC31_0__bin.31	CIBIO	MAG	2970561	19	264734	43.94	99.33	0		0	25.11	39.18	17		GUT_GENOME001379	MGYG-HGUT-00231	Coprococcus eutactus_A	ERS199217	ERP002061	Spain	Europe	ftp://ftp.ebi.ac.uk/pub/databases/metagenomics/mgnify_genomes/human-gut/v1.0/all_genomes/MGYG-HGUT-002/MGYG-HGUT-00231/genomes3/GUT_GENOME135187.gff.gz		2
GUT_GENOME135457	NielsenHB_2014__O2_UC40_0__bin.6	CIBIO	MAG	3038892	33	194568	43.94	98.29	0		0	0	0	17		GUT_GENOME001379	MGYG-HGUT-00231	Coprococcus eutactus_A	ERS199232	ERP002061	Spain	Europe	ftp://ftp.ebi.ac.uk/pub/databases/metagenomics/mgnify_genomes/human-gut/v1.0/all_genomes/MGYG-HGUT-002/MGYG-HGUT-00231/genomes1/GUT_GENOME135457.gff.gz		2
GUT_GENOME135465	NielsenHB_2014__O2_UC40_2__bin.28	CIBIO	MAG	2817524	54	80559	44.21	99.33	0		0	0	11.21	13		GUT_GENOME001379	MGYG-HGUT-00231	Coprococcus eutactus_A	ERS199233	ERP002061	Spain	Europe	ftp://ftp.ebi.ac.uk/pub/databases/metagenomics/mgnify_genomes/human-gut/v1.0/all_genomes/MGYG-HGUT-002/MGYG-HGUT-00231/genomes2/GUT_GENOME135465.gff.gz		2
GUT_GENOME135508	NielsenHB_2014__O2_UC41_0__bin.59	CIBIO	MAG	2894404	21	253270	43.97	98.66	0		0	0	6.02	16		GUT_GENOME001379	MGYG-HGUT-00231	Coprococcus eutactus_A	ERS199234	ERP002061	Spain	Europe	ftp://ftp.ebi.ac.uk/pub/databases/metagenomics/mgnify_genomes/human-gut/v1.0/all_genomes/MGYG-HGUT-002/MGYG-HGUT-00231/genomes1/GUT_GENOME135508.gff.gz		2
GUT_GENOME135556	NielsenHB_2014__O2_UC4_2__bin.57	CIBIO	MAG	2780319	37	119878	43.03	99.33	0		0	0	0	15		GUT_GENOME000055	MGYG-HGUT-00018	Coprococcus eutactus	ERS199231	ERP002061	Spain	Europe	ftp://ftp.ebi.ac.uk/pub/databases/metagenomics/mgnify_genomes/human-gut/v1.0/all_genomes/MGYG-HGUT-000/MGYG-HGUT-00018/genomes1/GUT_GENOME135556.gff.gz		1
GUT_GENOME135883	NielsenHB_2014__O2_UC51_0__bin.14	CIBIO	MAG	2991120	25	174986	43.77	99.33	0		0	0	0	16		GUT_GENOME001379	MGYG-HGUT-00231	Coprococcus eutactus_A	ERS199252	ERP002061	Spain	Europe	ftp://ftp.ebi.ac.uk/pub/databases/metagenomics/mgnify_genomes/human-gut/v1.0/all_genomes/MGYG-HGUT-002/MGYG-HGUT-00231/genomes1/GUT_GENOME135883.gff.gz		2
GUT_GENOME135912	NielsenHB_2014__O2_UC51_2__bin.24	CIBIO	MAG	2822453	31	178410	44.01	98.97	0		0	0	0	14		GUT_GENOME001379	MGYG-HGUT-00231	Coprococcus eutactus_A	ERS199253	ERP002061	Spain	Europe	ftp://ftp.ebi.ac.uk/pub/databases/metagenomics/mgnify_genomes/human-gut/v1.0/all_genomes/MGYG-HGUT-002/MGYG-HGUT-00231/genomes3/GUT_GENOME135912.gff.gz		2
GUT_GENOME136152	NielsenHB_2014__O2_UC56_0__bin.37	CIBIO	MAG	2348483	101	31818	41.25	98.54	0		0	0	0	11		GUT_GENOME001027	MGYG-HGUT-00189	Coprococcus sp000154245	ERS199262	ERP002061	Spain	Europe	ftp://ftp.ebi.ac.uk/pub/databases/metagenomics/mgnify_genomes/human-gut/v1.0/all_genomes/MGYG-HGUT-001/MGYG-HGUT-00189/genomes2/GUT_GENOME136152.gff.gz		5
GUT_GENOME136190	NielsenHB_2014__O2_UC57_0__bin.20	CIBIO	MAG	2821764	54	70733	44.25	99.33	0		0	0	5.44	15		GUT_GENOME001379	MGYG-HGUT-00231	Coprococcus eutactus_A	ERS199264	ERP002061	Spain	Europe	ftp://ftp.ebi.ac.uk/pub/databases/metagenomics/mgnify_genomes/human-gut/v1.0/all_genomes/MGYG-HGUT-002/MGYG-HGUT-00231/genomes3/GUT_GENOME136190.gff.gz		2
GUT_GENOME136219	NielsenHB_2014__O2_UC57_2__bin.27	CIBIO	MAG	2849598	37	144881	44	99.33	0		0	22.9	0	16		GUT_GENOME001379	MGYG-HGUT-00231	Coprococcus eutactus_A	ERS199265	ERP002061	Spain	Europe	ftp://ftp.ebi.ac.uk/pub/databases/metagenomics/mgnify_genomes/human-gut/v1.0/all_genomes/MGYG-HGUT-002/MGYG-HGUT-00231/genomes1/GUT_GENOME136219.gff.gz		2
GUT_GENOME136308	NielsenHB_2014__O2_UC59_2__bin.14	CIBIO	MAG	2562463	62	73932	41.39	97.35	0		0	11.42	0	12		GUT_GENOME001027	MGYG-HGUT-00189	Coprococcus sp900066115	ERS199269	ERP002061	Spain	Europe	ftp://ftp.ebi.ac.uk/pub/databases/metagenomics/mgnify_genomes/human-gut/v1.0/all_genomes/MGYG-HGUT-001/MGYG-HGUT-00189/genomes2/GUT_GENOME136308.gff.gz		4
GUT_GENOME136339	NielsenHB_2014__O2_UC60_0__bin.31	CIBIO	MAG	2726882	92	45703	44.28	97.86	0.22		0	0	0	14		GUT_GENOME001379	MGYG-HGUT-00231	Coprococcus eutactus_A	ERS199270	ERP002061	Spain	Europe	ftp://ftp.ebi.ac.uk/pub/databases/metagenomics/mgnify_genomes/human-gut/v1.0/all_genomes/MGYG-HGUT-002/MGYG-HGUT-00231/genomes1/GUT_GENOME136339.gff.gz		2
GUT_GENOME136690	NielsenHB_2014__V1_CD22_0__bin.69	CIBIO	MAG	2597635	41	130458	40.93	99.33	0		0	0	0	16		GUT_GENOME001027	MGYG-HGUT-00189	Coprococcus sp000154245	ERS199292	ERP002061	Spain	Europe	ftp://ftp.ebi.ac.uk/pub/databases/metagenomics/mgnify_genomes/human-gut/v1.0/all_genomes/MGYG-HGUT-001/MGYG-HGUT-00189/genomes1/GUT_GENOME136690.gff.gz		5
GUT_GENOME136702	NielsenHB_2014__V1_CD22_0__bin.98	CIBIO	MAG	2687592	75	45881	44.36	95.82	0		0	0	0	13		GUT_GENOME001379	MGYG-HGUT-00231	Coprococcus eutactus_A	ERS199292	ERP002061	Spain	Europe	ftp://ftp.ebi.ac.uk/pub/databases/metagenomics/mgnify_genomes/human-gut/v1.0/all_genomes/MGYG-HGUT-002/MGYG-HGUT-00231/genomes2/GUT_GENOME136702.gff.gz		2
GUT_GENOME137185	NielsenHB_2014__V1_UC10_2__bin.32	CIBIO	MAG	2505721	33	119258	41.03	97.82	0.13		0	0	0	13		GUT_GENOME001027	MGYG-HGUT-00189	Coprococcus sp000154245	ERS199318	ERP002061	Spain	Europe	ftp://ftp.ebi.ac.uk/pub/databases/metagenomics/mgnify_genomes/human-gut/v1.0/all_genomes/MGYG-HGUT-001/MGYG-HGUT-00189/genomes1/GUT_GENOME137185.gff.gz		5
GUT_GENOME137505	NielsenHB_2014__V1_UC21_4__bin.10	CIBIO	MAG	2676383	30	120510	41.27	98.66	0		0	0	0	17		GUT_GENOME001027	MGYG-HGUT-00189	Coprococcus sp900066115	ERS199337	ERP002061	Spain	Europe	ftp://ftp.ebi.ac.uk/pub/databases/metagenomics/mgnify_genomes/human-gut/v1.0/all_genomes/MGYG-HGUT-001/MGYG-HGUT-00189/genomes1/GUT_GENOME137505.gff.gz		4
GUT_GENOME137738	NielsenHB_2014__V1_UC28_0__bin.17	CIBIO	MAG	3012437	44	109585	42.96	99.33	0.34		0	52.71	0	16		GUT_GENOME000055	MGYG-HGUT-00018	Coprococcus eutactus	ERS199346	ERP002061	Spain	Europe	ftp://ftp.ebi.ac.uk/pub/databases/metagenomics/mgnify_genomes/human-gut/v1.0/all_genomes/MGYG-HGUT-000/MGYG-HGUT-00018/genomes1/GUT_GENOME137738.gff.gz		1
GUT_GENOME138019	NielsenHB_2014__V1_UC36_0__bin.27	CIBIO	MAG	2756659	27	173193	44.21	99.33	0		0	0	0	19		GUT_GENOME001379	MGYG-HGUT-00231	Coprococcus eutactus_A	ERS199358	ERP002061	Spain	Europe	ftp://ftp.ebi.ac.uk/pub/databases/metagenomics/mgnify_genomes/human-gut/v1.0/all_genomes/MGYG-HGUT-002/MGYG-HGUT-00231/genomes3/GUT_GENOME138019.gff.gz		2
GUT_GENOME138108	NielsenHB_2014__V1_UC40_0__bin.25	CIBIO	MAG	2639429	58	88974	41.42	99.27	0		0	22.9	0	15		GUT_GENOME001027	MGYG-HGUT-00189	Coprococcus sp900066115	ERS199364	ERP002061	Spain	Europe	ftp://ftp.ebi.ac.uk/pub/databases/metagenomics/mgnify_genomes/human-gut/v1.0/all_genomes/MGYG-HGUT-001/MGYG-HGUT-00189/genomes2/GUT_GENOME138108.gff.gz		4
GUT_GENOME138175	NielsenHB_2014__V1_UC43_0__bin.14	CIBIO	MAG	2864903	30	235000	43.85	95.97	0		0	0	0	17		GUT_GENOME001379	MGYG-HGUT-00231	Coprococcus eutactus_A	ERS199367	ERP002061	Spain	Europe	ftp://ftp.ebi.ac.uk/pub/databases/metagenomics/mgnify_genomes/human-gut/v1.0/all_genomes/MGYG-HGUT-002/MGYG-HGUT-00231/genomes3/GUT_GENOME138175.gff.gz		2
GUT_GENOME138530	NielsenHB_2014__V1_UC51_4__bin.31	CIBIO	MAG	2895769	42	98919	44.1	99.33	0		0	14.61	14.53	17		GUT_GENOME001379	MGYG-HGUT-00231	Coprococcus eutactus_A	ERS199379	ERP002061	Spain	Europe	ftp://ftp.ebi.ac.uk/pub/databases/metagenomics/mgnify_genomes/human-gut/v1.0/all_genomes/MGYG-HGUT-002/MGYG-HGUT-00231/genomes3/GUT_GENOME138530.gff.gz		2
GUT_GENOME138566	NielsenHB_2014__V1_UC52_0__bin.27	CIBIO	MAG	2963228	25	179673	43.97	99.33	0		0	25.38	11.21	19		GUT_GENOME001379	MGYG-HGUT-00231	Coprococcus eutactus_A	ERS199380	ERP002061	Spain	Europe	ftp://ftp.ebi.ac.uk/pub/databases/metagenomics/mgnify_genomes/human-gut/v1.0/all_genomes/MGYG-HGUT-002/MGYG-HGUT-00231/genomes2/GUT_GENOME138566.gff.gz		2
GUT_GENOME138624	NielsenHB_2014__V1_UC52_1__bin.70	CIBIO	MAG	2805780	39	103684	44.11	96.64	0		0	0	5.44	17		GUT_GENOME001379	MGYG-HGUT-00231	Coprococcus eutactus_A	ERS199381	ERP002061	Spain	Europe	ftp://ftp.ebi.ac.uk/pub/databases/metagenomics/mgnify_genomes/human-gut/v1.0/all_genomes/MGYG-HGUT-002/MGYG-HGUT-00231/genomes1/GUT_GENOME138624.gff.gz		2
GUT_GENOME138673	NielsenHB_2014__V1_UC53_4__bin.7	CIBIO	MAG	2991899	34	136698	44.08	98.66	0.04		0	24.27	0	18		GUT_GENOME001379	MGYG-HGUT-00231	Coprococcus eutactus_A	ERS199383	ERP002061	Spain	Europe	ftp://ftp.ebi.ac.uk/pub/databases/metagenomics/mgnify_genomes/human-gut/v1.0/all_genomes/MGYG-HGUT-002/MGYG-HGUT-00231/genomes2/GUT_GENOME138673.gff.gz		2
GUT_GENOME138866	NielsenHB_2014__V1_UC57_0__bin.29	CIBIO	MAG	2518522	51	75142	41.16	96.64	0		0	0	0	16		GUT_GENOME001027	MGYG-HGUT-00189	Coprococcus sp000154245	ERS199389	ERP002061	Spain	Europe	ftp://ftp.ebi.ac.uk/pub/databases/metagenomics/mgnify_genomes/human-gut/v1.0/all_genomes/MGYG-HGUT-001/MGYG-HGUT-00189/genomes2/GUT_GENOME138866.gff.gz		5
GUT_GENOME138951	NielsenHB_2014__V1_UC61_0__bin.7	CIBIO	MAG	2775310	46	89705	44.3	97.19	0		0	0	0	17		GUT_GENOME001379	MGYG-HGUT-00231	Coprococcus eutactus_A	ERS199391	ERP002061	Spain	Europe	ftp://ftp.ebi.ac.uk/pub/databases/metagenomics/mgnify_genomes/human-gut/v1.0/all_genomes/MGYG-HGUT-002/MGYG-HGUT-00231/genomes1/GUT_GENOME138951.gff.gz		2
GUT_GENOME139205	Obregon-TitoAJ_2015__NO03__bin.52	CIBIO	MAG	2851141	20	175951	44.02	99.33	0		0	0	11.21	15		GUT_GENOME001379	MGYG-HGUT-00231	Coprococcus eutactus_A	SRS820586	SRP052307	United States	North America	ftp://ftp.ebi.ac.uk/pub/databases/metagenomics/mgnify_genomes/human-gut/v1.0/all_genomes/MGYG-HGUT-002/MGYG-HGUT-00231/genomes3/GUT_GENOME139205.gff.gz		2
GUT_GENOME139408	Obregon-TitoAJ_2015__NO14__bin.21	CIBIO	MAG	2514196	31	122750	41.42	98.66	0		0	0	0	17		GUT_GENOME001027	MGYG-HGUT-00189	Coprococcus sp900066115	SRS820596	SRP052307	United States	North America	ftp://ftp.ebi.ac.uk/pub/databases/metagenomics/mgnify_genomes/human-gut/v1.0/all_genomes/MGYG-HGUT-001/MGYG-HGUT-00189/genomes1/GUT_GENOME139408.gff.gz		4
GUT_GENOME139664	Obregon-TitoAJ_2015__SM03__bin.6	CIBIO	MAG	3048193	33	136462	43.99	99.33	0		0	0	0	18		GUT_GENOME001379	MGYG-HGUT-00231	Coprococcus eutactus_A	SRS820608	SRP052307	Peru	South America	ftp://ftp.ebi.ac.uk/pub/databases/metagenomics/mgnify_genomes/human-gut/v1.0/all_genomes/MGYG-HGUT-002/MGYG-HGUT-00231/genomes1/GUT_GENOME139664.gff.gz		2
GUT_GENOME140108	OF10-22XD	CGR	Isolate	2743803	41	165762	41.21	96.64	0		0	99.74	99.79	20	GCA_003481895	GUT_GENOME001027	MGYG-HGUT-00189	Coprococcus sp900066115	SAMN09736735	PRJNA482748	China	Asia	ftp://ftp.ebi.ac.uk/pub/databases/metagenomics/mgnify_genomes/human-gut/v1.0/all_genomes/MGYG-HGUT-001/MGYG-HGUT-00189/genomes1/GUT_GENOME140108.gff.gz		4
GUT_GENOME140272	OM04-5BH	CGR	Isolate	2644239	19	298315	41.77	99.33	0		0	99.74	99.79	19	GCA_003482105	GUT_GENOME140272	MGYG-HGUT-02289	Coprococcus sp000433075	SAMN09736788	PRJNA482748	China	Asia	ftp://ftp.ebi.ac.uk/pub/databases/metagenomics/mgnify_genomes/human-gut/v1.0/all_genomes/MGYG-HGUT-022/MGYG-HGUT-02289/genomes1/GUT_GENOME140272.gff.gz		8
GUT_GENOME140297	OM05-9	CGR	Isolate	2881575	21	384402	41.29	99.33	0		0	99.74	99.79	20	GCA_003481465	GUT_GENOME001027	MGYG-HGUT-00189	Coprococcus sp900066115	SAMN09736811	PRJNA482748	China	Asia	ftp://ftp.ebi.ac.uk/pub/databases/metagenomics/mgnify_genomes/human-gut/v1.0/all_genomes/MGYG-HGUT-001/MGYG-HGUT-00189/genomes1/GUT_GENOME140297.gff.gz		4
GUT_GENOME140306	OM06-25	CGR	Isolate	3093164	42	242879	43.66	96.98	0		0	99.74	97.09	20	GCA_003462565	GUT_GENOME001379	MGYG-HGUT-00231	Coprococcus eutactus_A	SAMN09736822	PRJNA482748	China	Asia	ftp://ftp.ebi.ac.uk/pub/databases/metagenomics/mgnify_genomes/human-gut/v1.0/all_genomes/MGYG-HGUT-002/MGYG-HGUT-00231/genomes4/GUT_GENOME140306.gff.gz		2
GUT_GENOME140310	OM06-34AC	CGR	Isolate	3092290	24	357086	43.68	99.33	0		0	99.74	89.13	20	GCA_003462545	GUT_GENOME001379	MGYG-HGUT-00231	Coprococcus eutactus_A	SAMN09736825	PRJNA482748	China	Asia	ftp://ftp.ebi.ac.uk/pub/databases/metagenomics/mgnify_genomes/human-gut/v1.0/all_genomes/MGYG-HGUT-002/MGYG-HGUT-00231/genomes2/GUT_GENOME140310.gff.gz		2
GUT_GENOME148080	QinJ_2012__CON-014__bin.14	CIBIO	MAG	2801289	41	151637	44.03	99.33	0		0	0	11.21	18		GUT_GENOME001379	MGYG-HGUT-00231	Coprococcus eutactus_A	SRS3263186		China	Asia	ftp://ftp.ebi.ac.uk/pub/databases/metagenomics/mgnify_genomes/human-gut/v1.0/all_genomes/MGYG-HGUT-002/MGYG-HGUT-00231/genomes4/GUT_GENOME148080.gff.gz		2
GUT_GENOME148668	QinJ_2012__CON-053__bin.11	CIBIO	MAG	2909774	28	167719	43.97	99.33	0		0	46.9	0	17		GUT_GENOME001379	MGYG-HGUT-00231	Coprococcus eutactus_A	SRS3263360		China	Asia	ftp://ftp.ebi.ac.uk/pub/databases/metagenomics/mgnify_genomes/human-gut/v1.0/all_genomes/MGYG-HGUT-002/MGYG-HGUT-00231/genomes1/GUT_GENOME148668.gff.gz		2
GUT_GENOME148695	QinJ_2012__CON-054__bin.14	CIBIO	MAG	2973352	16	414480	43.99	99.33	0		0	0	0	18		GUT_GENOME001379	MGYG-HGUT-00231	Coprococcus eutactus_A	SRS3263120		China	Asia	ftp://ftp.ebi.ac.uk/pub/databases/metagenomics/mgnify_genomes/human-gut/v1.0/all_genomes/MGYG-HGUT-002/MGYG-HGUT-00231/genomes2/GUT_GENOME148695.gff.gz		2
GUT_GENOME148888	QinJ_2012__CON-066__bin.19	CIBIO	MAG	2715263	24	155225	41.26	99.33	0		0	0	10.74	18		GUT_GENOME001027	MGYG-HGUT-00189	Coprococcus sp900066115	SRS3263368		China	Asia	ftp://ftp.ebi.ac.uk/pub/databases/metagenomics/mgnify_genomes/human-gut/v1.0/all_genomes/MGYG-HGUT-001/MGYG-HGUT-00189/genomes1/GUT_GENOME148888.gff.gz		4
GUT_GENOME149625	QinJ_2012__DLF003__bin.5	CIBIO	MAG	2485783	46	105212	41.78	98.03	0		0	0	0	17		GUT_GENOME140272	MGYG-HGUT-02289	Coprococcus sp000433075	SRS259436	SRP008047	China	Asia	ftp://ftp.ebi.ac.uk/pub/databases/metagenomics/mgnify_genomes/human-gut/v1.0/all_genomes/MGYG-HGUT-022/MGYG-HGUT-02289/genomes1/GUT_GENOME149625.gff.gz		8
GUT_GENOME149765	QinJ_2012__DLM002__bin.28	CIBIO	MAG	2801702	33	199610	44.07	98.68	0		0	25.11	0	19		GUT_GENOME001379	MGYG-HGUT-00231	Coprococcus eutactus_A	SRS259443	SRP008047	China	Asia	ftp://ftp.ebi.ac.uk/pub/databases/metagenomics/mgnify_genomes/human-gut/v1.0/all_genomes/MGYG-HGUT-002/MGYG-HGUT-00231/genomes3/GUT_GENOME149765.gff.gz		2
GUT_GENOME150537	QinJ_2012__NLF013__bin.38	CIBIO	MAG	2585242	64	63450	41.22	99.18	0		0	0	0	16		GUT_GENOME001027	MGYG-HGUT-00189	Coprococcus sp000154245	SRS259545	SRP008047	China	Asia	ftp://ftp.ebi.ac.uk/pub/databases/metagenomics/mgnify_genomes/human-gut/v1.0/all_genomes/MGYG-HGUT-001/MGYG-HGUT-00189/genomes1/GUT_GENOME150537.gff.gz		5
GUT_GENOME150702	QinJ_2012__NLM021__bin.8	CIBIO	MAG	2828913	38	113842	41.26	97.32	0		0	0	0	16		GUT_GENOME001027	MGYG-HGUT-00189	Coprococcus sp900066115	SRS259552	SRP008047	China	Asia	ftp://ftp.ebi.ac.uk/pub/databases/metagenomics/mgnify_genomes/human-gut/v1.0/all_genomes/MGYG-HGUT-001/MGYG-HGUT-00189/genomes1/GUT_GENOME150702.gff.gz		4
GUT_GENOME150764	QinJ_2012__NLM026__bin.25	CIBIO	MAG	2439556	46	80564	42	99.06	0.34		0	15.79	0	15		GUT_GENOME140272	MGYG-HGUT-02289	Coprococcus sp000433075	SRS259555	SRP008047	China	Asia	ftp://ftp.ebi.ac.uk/pub/databases/metagenomics/mgnify_genomes/human-gut/v1.0/all_genomes/MGYG-HGUT-022/MGYG-HGUT-02289/genomes1/GUT_GENOME150764.gff.gz		8
GUT_GENOME150907	QinJ_2012__NOF008__bin.12	CIBIO	MAG	2480880	29	159517	41.83	99.33	0		0	0	11.21	17		GUT_GENOME140272	MGYG-HGUT-02289	Coprococcus sp000433075	SRS259562	SRP008047	China	Asia	ftp://ftp.ebi.ac.uk/pub/databases/metagenomics/mgnify_genomes/human-gut/v1.0/all_genomes/MGYG-HGUT-022/MGYG-HGUT-02289/genomes1/GUT_GENOME150907.gff.gz		8
GUT_GENOME151433	QinJ_2012__T2D-013__bin.15	CIBIO	MAG	2744624	27	141793	40.74	97.99	0		0	0	0	16		GUT_GENOME001027	MGYG-HGUT-00189	Coprococcus sp900066115	SRS294956	SRP008047	China	Asia	ftp://ftp.ebi.ac.uk/pub/databases/metagenomics/mgnify_genomes/human-gut/v1.0/all_genomes/MGYG-HGUT-001/MGYG-HGUT-00189/genomes2/GUT_GENOME151433.gff.gz		4
GUT_GENOME152168	QinJ_2012__T2D-049__bin.10	CIBIO	MAG	2630137	26	209002	41.42	99.33	0		0	0	0	19		GUT_GENOME001027	MGYG-HGUT-00189	Coprococcus sp900066115	SRS295003	SRP008047	China	Asia	ftp://ftp.ebi.ac.uk/pub/databases/metagenomics/mgnify_genomes/human-gut/v1.0/all_genomes/MGYG-HGUT-001/MGYG-HGUT-00189/genomes2/GUT_GENOME152168.gff.gz		4
GUT_GENOME152417	QinJ_2012__T2D-062__bin.43	CIBIO	MAG	2714870	28	149864	41.25	95.97	0.67		0	52.71	11.08	15		GUT_GENOME001027	MGYG-HGUT-00189	Coprococcus sp900066115	SRS295012	SRP008047	China	Asia	ftp://ftp.ebi.ac.uk/pub/databases/metagenomics/mgnify_genomes/human-gut/v1.0/all_genomes/MGYG-HGUT-001/MGYG-HGUT-00189/genomes1/GUT_GENOME152417.gff.gz		4
GUT_GENOME153335	QinJ_2012__T2D-105__bin.7	CIBIO	MAG	2892155	23	249476	44.22	99.33	0		0	0	0	17		GUT_GENOME001379	MGYG-HGUT-00231	Coprococcus eutactus_A	SRS294931	SRP008047	China	Asia	ftp://ftp.ebi.ac.uk/pub/databases/metagenomics/mgnify_genomes/human-gut/v1.0/all_genomes/MGYG-HGUT-002/MGYG-HGUT-00231/genomes3/GUT_GENOME153335.gff.gz		2
GUT_GENOME153458	QinN_2014__HD-12__bin.51	CIBIO	MAG	2933933	29	165201	43.88	99.33	0		0	0	9.3	16		GUT_GENOME001379	MGYG-HGUT-00231	Coprococcus eutactus_A	ERS475108	ERP005860	China	Asia	ftp://ftp.ebi.ac.uk/pub/databases/metagenomics/mgnify_genomes/human-gut/v1.0/all_genomes/MGYG-HGUT-002/MGYG-HGUT-00231/genomes3/GUT_GENOME153458.gff.gz		2
GUT_GENOME153487	QinN_2014__HD-15__bin.34	CIBIO	MAG	2770496	22	270809	44.14	99.33	0		0	0	0	17		GUT_GENOME001379	MGYG-HGUT-00231	Coprococcus eutactus_A	ERS475112	ERP005860	China	Asia	ftp://ftp.ebi.ac.uk/pub/databases/metagenomics/mgnify_genomes/human-gut/v1.0/all_genomes/MGYG-HGUT-002/MGYG-HGUT-00231/genomes1/GUT_GENOME153487.gff.gz		2
GUT_GENOME153560	QinN_2014__HD-18__bin.28	CIBIO	MAG	2603315	197	19726	43.42	95.25	0.1		0	17.68	0	14		GUT_GENOME000055	MGYG-HGUT-00018	Coprococcus eutactus	ERS475119	ERP005860	China	Asia	ftp://ftp.ebi.ac.uk/pub/databases/metagenomics/mgnify_genomes/human-gut/v1.0/all_genomes/MGYG-HGUT-000/MGYG-HGUT-00018/genomes1/GUT_GENOME153560.gff.gz		1
GUT_GENOME153699	QinN_2014__HD-26__bin.28	CIBIO	MAG	2949077	17	267824	44.14	99.33	0		0	46.25	0	18		GUT_GENOME001379	MGYG-HGUT-00231	Coprococcus eutactus_A	ERS475130	ERP005860	China	Asia	ftp://ftp.ebi.ac.uk/pub/databases/metagenomics/mgnify_genomes/human-gut/v1.0/all_genomes/MGYG-HGUT-002/MGYG-HGUT-00231/genomes3/GUT_GENOME153699.gff.gz		2
GUT_GENOME153830	QinN_2014__HD-32__bin.15	CIBIO	MAG	2629480	20	224327	41.37	99.33	0		0	0	0	18		GUT_GENOME001027	MGYG-HGUT-00189	Coprococcus sp900066115	ERS475138	ERP005860	China	Asia	ftp://ftp.ebi.ac.uk/pub/databases/metagenomics/mgnify_genomes/human-gut/v1.0/all_genomes/MGYG-HGUT-001/MGYG-HGUT-00189/genomes2/GUT_GENOME153830.gff.gz		4
GUT_GENOME153878	QinN_2014__HD-33__bin.7	CIBIO	MAG	2538916	35	186057	41.16	97.99	0		0	0	0	15		GUT_GENOME001027	MGYG-HGUT-00189	Coprococcus sp000154245	ERS475139	ERP005860	China	Asia	ftp://ftp.ebi.ac.uk/pub/databases/metagenomics/mgnify_genomes/human-gut/v1.0/all_genomes/MGYG-HGUT-001/MGYG-HGUT-00189/genomes1/GUT_GENOME153878.gff.gz		5
GUT_GENOME153936	QinN_2014__HD-35__bin.6	CIBIO	MAG	2663858	53	60863	44.49	95.3	0		0	0	5.37	15		GUT_GENOME001379	MGYG-HGUT-00231	Coprococcus eutactus_A	ERS475141	ERP005860	China	Asia	ftp://ftp.ebi.ac.uk/pub/databases/metagenomics/mgnify_genomes/human-gut/v1.0/all_genomes/MGYG-HGUT-002/MGYG-HGUT-00231/genomes2/GUT_GENOME153936.gff.gz		2
GUT_GENOME154176	QinN_2014__HD-47__bin.9	CIBIO	MAG	2564360	52	73849	40.98	98.66	0		0	24.27	0	16		GUT_GENOME001027	MGYG-HGUT-00189	Coprococcus sp000154245	ERS475160	ERP005860	China	Asia	ftp://ftp.ebi.ac.uk/pub/databases/metagenomics/mgnify_genomes/human-gut/v1.0/all_genomes/MGYG-HGUT-001/MGYG-HGUT-00189/genomes1/GUT_GENOME154176.gff.gz		5
GUT_GENOME154455	QinN_2014__HD-60__bin.45	CIBIO	MAG	2900642	18	276849	42.96	99.33	0.67		0	15.72	0	18		GUT_GENOME000055	MGYG-HGUT-00018	Coprococcus eutactus	ERS475181	ERP005860	China	Asia	ftp://ftp.ebi.ac.uk/pub/databases/metagenomics/mgnify_genomes/human-gut/v1.0/all_genomes/MGYG-HGUT-000/MGYG-HGUT-00018/genomes1/GUT_GENOME154455.gff.gz		1
GUT_GENOME154500	QinN_2014__HD-62__bin.17	CIBIO	MAG	2425712	26	189478	41.93	99.33	0		0	0	0	16		GUT_GENOME140272	MGYG-HGUT-02289	Coprococcus sp000433075	ERS475183	ERP005860	China	Asia	ftp://ftp.ebi.ac.uk/pub/databases/metagenomics/mgnify_genomes/human-gut/v1.0/all_genomes/MGYG-HGUT-022/MGYG-HGUT-02289/genomes1/GUT_GENOME154500.gff.gz		8
GUT_GENOME154601	QinN_2014__HD-67__bin.23	CIBIO	MAG	2598415	25	193533	41.42	98.66	0.67		0	0	22.74	18		GUT_GENOME001027	MGYG-HGUT-00189	Coprococcus sp900066115	ERS475188	ERP005860	China	Asia	ftp://ftp.ebi.ac.uk/pub/databases/metagenomics/mgnify_genomes/human-gut/v1.0/all_genomes/MGYG-HGUT-001/MGYG-HGUT-00189/genomes2/GUT_GENOME154601.gff.gz		4
GUT_GENOME154908	QinN_2014__HD-8__bin.45	CIBIO	MAG	2828934	28	188671	43.81	99.33	0.31		0	0	0	14		GUT_GENOME001379	MGYG-HGUT-00231	Coprococcus eutactus_A	ERS475202	ERP005860	China	Asia	ftp://ftp.ebi.ac.uk/pub/databases/metagenomics/mgnify_genomes/human-gut/v1.0/all_genomes/MGYG-HGUT-002/MGYG-HGUT-00231/genomes1/GUT_GENOME154908.gff.gz		2
GUT_GENOME154920	QinN_2014__HD-8__bin.63	CIBIO	MAG	2578042	47	88854	41.28	99.33	0.34		0	0	0	14		GUT_GENOME001027	MGYG-HGUT-00189	Coprococcus sp900066115	ERS475202	ERP005860	China	Asia	ftp://ftp.ebi.ac.uk/pub/databases/metagenomics/mgnify_genomes/human-gut/v1.0/all_genomes/MGYG-HGUT-001/MGYG-HGUT-00189/genomes1/GUT_GENOME154920.gff.gz		4
GUT_GENOME155160	QinN_2014__HV-4__bin.11	CIBIO	MAG	2788333	64	64654	44.45	97.38	0.02		0	0	0	13		GUT_GENOME001379	MGYG-HGUT-00231	Coprococcus eutactus_A	ERS475241	ERP005860	China	Asia	ftp://ftp.ebi.ac.uk/pub/databases/metagenomics/mgnify_genomes/human-gut/v1.0/all_genomes/MGYG-HGUT-002/MGYG-HGUT-00231/genomes2/GUT_GENOME155160.gff.gz		2
GUT_GENOME155189	QinN_2014__HV-6__bin.44	CIBIO	MAG	2842398	43	136996	43.95	97.74	0		0	0	0	17		GUT_GENOME001379	MGYG-HGUT-00231	Coprococcus eutactus_A	ERS475243	ERP005860	China	Asia	ftp://ftp.ebi.ac.uk/pub/databases/metagenomics/mgnify_genomes/human-gut/v1.0/all_genomes/MGYG-HGUT-002/MGYG-HGUT-00231/genomes3/GUT_GENOME155189.gff.gz		2
GUT_GENOME157841	RaymondF_2016__P13E90__bin.27	CIBIO	MAG	2625081	93	42621	43.35	95.64	0		0	0	0	15		GUT_GENOME000055	MGYG-HGUT-00018	Coprococcus eutactus	ERS634967	ERP009131	Canada	North America	ftp://ftp.ebi.ac.uk/pub/databases/metagenomics/mgnify_genomes/human-gut/v1.0/all_genomes/MGYG-HGUT-000/MGYG-HGUT-00018/genomes1/GUT_GENOME157841.gff.gz		1
GUT_GENOME158904	RaymondF_2016__P25C0__bin.54	CIBIO	MAG	2874897	57	66104	44.34	99.33	0		0	0	0	16		GUT_GENOME001379	MGYG-HGUT-00231	Coprococcus eutactus_A	ERS634929	ERP009131	Canada	North America	ftp://ftp.ebi.ac.uk/pub/databases/metagenomics/mgnify_genomes/human-gut/v1.0/all_genomes/MGYG-HGUT-002/MGYG-HGUT-00231/genomes3/GUT_GENOME158904.gff.gz		2
GUT_GENOME158959	RaymondF_2016__P25C90__bin.28	CIBIO	MAG	2980880	36	101903	43.97	99.33	0		0	0	5.78	18		GUT_GENOME001379	MGYG-HGUT-00231	Coprococcus eutactus_A	ERS634977	ERP009131	Canada	North America	ftp://ftp.ebi.ac.uk/pub/databases/metagenomics/mgnify_genomes/human-gut/v1.0/all_genomes/MGYG-HGUT-002/MGYG-HGUT-00231/genomes3/GUT_GENOME158959.gff.gz		2
GUT_GENOME158993	RaymondF_2016__P2E0__bin.111	CIBIO	MAG	2793755	72	62878	43.18	97.82	0.67		0	0	0	14		GUT_GENOME000055	MGYG-HGUT-00018	Coprococcus eutactus	ERS634908	ERP009131	Canada	North America	ftp://ftp.ebi.ac.uk/pub/databases/metagenomics/mgnify_genomes/human-gut/v1.0/all_genomes/MGYG-HGUT-000/MGYG-HGUT-00018/genomes1/GUT_GENOME158993.gff.gz		1
GUT_GENOME159144	RaymondF_2016__P38C7__bin.11	CIBIO	MAG	2963804	41	113197	43.02	95.97	0.02		0	0	0	18		GUT_GENOME000055	MGYG-HGUT-00018	Coprococcus eutactus	ERS634954	ERP009131	Canada	North America	ftp://ftp.ebi.ac.uk/pub/databases/metagenomics/mgnify_genomes/human-gut/v1.0/all_genomes/MGYG-HGUT-000/MGYG-HGUT-00018/genomes1/GUT_GENOME159144.gff.gz		1
GUT_GENOME159191	RaymondF_2016__P38C90__bin.18	CIBIO	MAG	2853288	25	202690	43.07	95.3	0		0	51.99	0	18		GUT_GENOME000055	MGYG-HGUT-00018	Coprococcus eutactus	ERS634978	ERP009131	Canada	North America	ftp://ftp.ebi.ac.uk/pub/databases/metagenomics/mgnify_genomes/human-gut/v1.0/all_genomes/MGYG-HGUT-000/MGYG-HGUT-00018/genomes1/GUT_GENOME159191.gff.gz		1
GUT_GENOME159580	RaymondF_2016__P7C90__bin.28	CIBIO	MAG	2515607	187	20940	44.82	95.3	0.22		0	0	0	14		GUT_GENOME001379	MGYG-HGUT-00231	Coprococcus eutactus_A	ERS634961	ERP009131	Canada	North America	ftp://ftp.ebi.ac.uk/pub/databases/metagenomics/mgnify_genomes/human-gut/v1.0/all_genomes/MGYG-HGUT-002/MGYG-HGUT-00231/genomes2/GUT_GENOME159580.gff.gz		2
GUT_GENOME159779	SchirmerM_2016__G88704__bin.15	CIBIO	MAG	2606077	201	19625	41.52	96.48	0.21		0	0	11.01	15		GUT_GENOME001027	MGYG-HGUT-00189	Coprococcus sp000154245	SRS1876695	SRP095580	Netherlands	Europe	ftp://ftp.ebi.ac.uk/pub/databases/metagenomics/mgnify_genomes/human-gut/v1.0/all_genomes/MGYG-HGUT-001/MGYG-HGUT-00189/genomes2/GUT_GENOME159779.gff.gz		5
GUT_GENOME159896	SchirmerM_2016__G88723__bin.4	CIBIO	MAG	2896244	96	49367	44.27	97.62	0		0	23.22	0	15		GUT_GENOME001379	MGYG-HGUT-00231	Coprococcus eutactus_A	SRS1876298	SRP095580	Netherlands	Europe	ftp://ftp.ebi.ac.uk/pub/databases/metagenomics/mgnify_genomes/human-gut/v1.0/all_genomes/MGYG-HGUT-002/MGYG-HGUT-00231/genomes2/GUT_GENOME159896.gff.gz		2
GUT_GENOME160087	SchirmerM_2016__G88755__bin.1	CIBIO	MAG	2824093	69	87344	44.23	98.66	0		0	0	36.96	18		GUT_GENOME001379	MGYG-HGUT-00231	Coprococcus eutactus_A	SRS1876504	SRP095580	Netherlands	Europe	ftp://ftp.ebi.ac.uk/pub/databases/metagenomics/mgnify_genomes/human-gut/v1.0/all_genomes/MGYG-HGUT-002/MGYG-HGUT-00231/genomes3/GUT_GENOME160087.gff.gz		2
GUT_GENOME160427	SchirmerM_2016__G88796__bin.12	CIBIO	MAG	2471587	85	46714	41.58	99.33	0		0	0	0	16		GUT_GENOME001027	MGYG-HGUT-00189	Coprococcus sp900066115	SRS1876434	SRP095580	Netherlands	Europe	ftp://ftp.ebi.ac.uk/pub/databases/metagenomics/mgnify_genomes/human-gut/v1.0/all_genomes/MGYG-HGUT-001/MGYG-HGUT-00189/genomes1/GUT_GENOME160427.gff.gz		4
GUT_GENOME160464	SchirmerM_2016__G88798__bin.15	CIBIO	MAG	2821139	127	31200	44.34	97.99	0.67		0	0	10.77	16		GUT_GENOME001379	MGYG-HGUT-00231	Coprococcus eutactus_A	SRS1876589	SRP095580	Netherlands	Europe	ftp://ftp.ebi.ac.uk/pub/databases/metagenomics/mgnify_genomes/human-gut/v1.0/all_genomes/MGYG-HGUT-002/MGYG-HGUT-00231/genomes2/GUT_GENOME160464.gff.gz		2
GUT_GENOME160721	SchirmerM_2016__G88830__bin.3	CIBIO	MAG	2818894	62	57463	44.33	95.97	0.67		0	11.42	0	19		GUT_GENOME001379	MGYG-HGUT-00231	Coprococcus eutactus_A	SRS1876525	SRP095580	Netherlands	Europe	ftp://ftp.ebi.ac.uk/pub/databases/metagenomics/mgnify_genomes/human-gut/v1.0/all_genomes/MGYG-HGUT-002/MGYG-HGUT-00231/genomes2/GUT_GENOME160721.gff.gz		2
GUT_GENOME161015	SchirmerM_2016__G88869__bin.3	CIBIO	MAG	2605993	157	27771	41.05	99.33	0		0	33.86	0	17		GUT_GENOME001027	MGYG-HGUT-00189	Coprococcus sp000154245	SRS1876414	SRP095580	Netherlands	Europe	ftp://ftp.ebi.ac.uk/pub/databases/metagenomics/mgnify_genomes/human-gut/v1.0/all_genomes/MGYG-HGUT-001/MGYG-HGUT-00189/genomes1/GUT_GENOME161015.gff.gz		5
GUT_GENOME161038	SchirmerM_2016__G88871__bin.4	CIBIO	MAG	2682558	89	57178	41.28	98.66	0		0	23.16	0	15		GUT_GENOME001027	MGYG-HGUT-00189	Coprococcus sp900066115	SRS1876500	SRP095580	Netherlands	Europe	ftp://ftp.ebi.ac.uk/pub/databases/metagenomics/mgnify_genomes/human-gut/v1.0/all_genomes/MGYG-HGUT-001/MGYG-HGUT-00189/genomes1/GUT_GENOME161038.gff.gz		4
GUT_GENOME161047	SchirmerM_2016__G88872__bin.21	CIBIO	MAG	2369503	243	14667	41.63	96.12	0.67		0	0	0	11		GUT_GENOME001027	MGYG-HGUT-00189	Coprococcus sp000154245	SRS1876310	SRP095580	Netherlands	Europe	ftp://ftp.ebi.ac.uk/pub/databases/metagenomics/mgnify_genomes/human-gut/v1.0/all_genomes/MGYG-HGUT-001/MGYG-HGUT-00189/genomes1/GUT_GENOME161047.gff.gz		5
GUT_GENOME161082	SchirmerM_2016__G88875__bin.35	CIBIO	MAG	2857908	98	46601	44.27	97.65	0.02		0	9.26	0	14		GUT_GENOME001379	MGYG-HGUT-00231	Coprococcus eutactus_A	SRS1876287	SRP095580	Netherlands	Europe	ftp://ftp.ebi.ac.uk/pub/databases/metagenomics/mgnify_genomes/human-gut/v1.0/all_genomes/MGYG-HGUT-002/MGYG-HGUT-00231/genomes4/GUT_GENOME161082.gff.gz		2
GUT_GENOME161151	SchirmerM_2016__G88884__bin.12	CIBIO	MAG	2631786	71	62074	41.37	97.99	0.67		0	0	0	16		GUT_GENOME001027	MGYG-HGUT-00189	Coprococcus sp900066115	SRS1876628	SRP095580	Netherlands	Europe	ftp://ftp.ebi.ac.uk/pub/databases/metagenomics/mgnify_genomes/human-gut/v1.0/all_genomes/MGYG-HGUT-001/MGYG-HGUT-00189/genomes1/GUT_GENOME161151.gff.gz		4
GUT_GENOME161309	SchirmerM_2016__G88900__bin.34	CIBIO	MAG	2129651	195	16058	42.3	95.87	0.76		0	23.22	0	11		GUT_GENOME140272	MGYG-HGUT-02289	Coprococcus sp000433075	SRS1876262	SRP095580	Netherlands	Europe	ftp://ftp.ebi.ac.uk/pub/databases/metagenomics/mgnify_genomes/human-gut/v1.0/all_genomes/MGYG-HGUT-022/MGYG-HGUT-02289/genomes1/GUT_GENOME161309.gff.gz		8
GUT_GENOME161556	SchirmerM_2016__G88930__bin.12	CIBIO	MAG	2817165	64	68352	44.38	95.97	0.13		0	0	0	18		GUT_GENOME001379	MGYG-HGUT-00231	Coprococcus eutactus_A	SRS1876350	SRP095580	Netherlands	Europe	ftp://ftp.ebi.ac.uk/pub/databases/metagenomics/mgnify_genomes/human-gut/v1.0/all_genomes/MGYG-HGUT-002/MGYG-HGUT-00231/genomes3/GUT_GENOME161556.gff.gz		2
GUT_GENOME161569	SchirmerM_2016__G88932__bin.14	CIBIO	MAG	2777826	82	42745	44.21	99.33	0		0	0	11.15	17		GUT_GENOME001379	MGYG-HGUT-00231	Coprococcus eutactus_A	SRS1876442	SRP095580	Netherlands	Europe	ftp://ftp.ebi.ac.uk/pub/databases/metagenomics/mgnify_genomes/human-gut/v1.0/all_genomes/MGYG-HGUT-002/MGYG-HGUT-00231/genomes3/GUT_GENOME161569.gff.gz		2
GUT_GENOME161752	SchirmerM_2016__G88954__bin.11	CIBIO	MAG	2903988	78	61653	44.16	99.33	0		0	0	11.01	16		GUT_GENOME001379	MGYG-HGUT-00231	Coprococcus eutactus_A	SRS1876260	SRP095580	Netherlands	Europe	ftp://ftp.ebi.ac.uk/pub/databases/metagenomics/mgnify_genomes/human-gut/v1.0/all_genomes/MGYG-HGUT-002/MGYG-HGUT-00231/genomes2/GUT_GENOME161752.gff.gz		2
GUT_GENOME162075	SchirmerM_2016__G88994__bin.20	CIBIO	MAG	2725648	140	31760	44.44	98.66	0.22		0	0	0	14		GUT_GENOME001379	MGYG-HGUT-00231	Coprococcus eutactus_A	SRS1876411	SRP095580	Netherlands	Europe	ftp://ftp.ebi.ac.uk/pub/databases/metagenomics/mgnify_genomes/human-gut/v1.0/all_genomes/MGYG-HGUT-002/MGYG-HGUT-00231/genomes1/GUT_GENOME162075.gff.gz		2
GUT_GENOME162214	SchirmerM_2016__G89008__bin.5	CIBIO	MAG	2836131	64	59632	44.12	95.97	0		0	23.22	0	17		GUT_GENOME001379	MGYG-HGUT-00231	Coprococcus eutactus_A	SRS1876324	SRP095580	Netherlands	Europe	ftp://ftp.ebi.ac.uk/pub/databases/metagenomics/mgnify_genomes/human-gut/v1.0/all_genomes/MGYG-HGUT-002/MGYG-HGUT-00231/genomes2/GUT_GENOME162214.gff.gz		2
GUT_GENOME162300	SchirmerM_2016__G89019__bin.16	CIBIO	MAG	2565894	179	24327	41.16	95.08	0		0	0	10.77	14		GUT_GENOME001027	MGYG-HGUT-00189	Coprococcus sp000154245	SRS1876548	SRP095580	Netherlands	Europe	ftp://ftp.ebi.ac.uk/pub/databases/metagenomics/mgnify_genomes/human-gut/v1.0/all_genomes/MGYG-HGUT-001/MGYG-HGUT-00189/genomes1/GUT_GENOME162300.gff.gz		5
GUT_GENOME162800	SchirmerM_2016__G89065__bin.25	CIBIO	MAG	2444475	218	16086	41.47	95.97	0.56		0	0	0	14		GUT_GENOME001027	MGYG-HGUT-00189	Coprococcus sp000154245	SRS1876639	SRP095580	Netherlands	Europe	ftp://ftp.ebi.ac.uk/pub/databases/metagenomics/mgnify_genomes/human-gut/v1.0/all_genomes/MGYG-HGUT-001/MGYG-HGUT-00189/genomes2/GUT_GENOME162800.gff.gz		5
GUT_GENOME163101	SchirmerM_2016__G89098__bin.10	CIBIO	MAG	2816108	58	67017	44.21	98.66	0		0	0	0	18		GUT_GENOME001379	MGYG-HGUT-00231	Coprococcus eutactus_A	SRS1876619	SRP095580	Netherlands	Europe	ftp://ftp.ebi.ac.uk/pub/databases/metagenomics/mgnify_genomes/human-gut/v1.0/all_genomes/MGYG-HGUT-002/MGYG-HGUT-00231/genomes2/GUT_GENOME163101.gff.gz		2
GUT_GENOME163154	SchirmerM_2016__G89103__bin.4	CIBIO	MAG	2858261	79	55985	44.3	99.33	0		0	0	0	18		GUT_GENOME001379	MGYG-HGUT-00231	Coprococcus eutactus_A	SRS1876617	SRP095580	Netherlands	Europe	ftp://ftp.ebi.ac.uk/pub/databases/metagenomics/mgnify_genomes/human-gut/v1.0/all_genomes/MGYG-HGUT-002/MGYG-HGUT-00231/genomes4/GUT_GENOME163154.gff.gz		2
GUT_GENOME163278	SchirmerM_2016__G89121__bin.14	CIBIO	MAG	2735404	80	49885	44.37	95.3	0		0	0	0	17		GUT_GENOME001379	MGYG-HGUT-00231	Coprococcus eutactus_A	SRS1876410	SRP095580	Netherlands	Europe	ftp://ftp.ebi.ac.uk/pub/databases/metagenomics/mgnify_genomes/human-gut/v1.0/all_genomes/MGYG-HGUT-002/MGYG-HGUT-00231/genomes3/GUT_GENOME163278.gff.gz		2
GUT_GENOME163483	SchirmerM_2016__G89144__bin.2	CIBIO	MAG	2797141	117	36742	44.38	97.99	0		0	0	16.65	16		GUT_GENOME001379	MGYG-HGUT-00231	Coprococcus eutactus_A	SRS1876607	SRP095580	Netherlands	Europe	ftp://ftp.ebi.ac.uk/pub/databases/metagenomics/mgnify_genomes/human-gut/v1.0/all_genomes/MGYG-HGUT-002/MGYG-HGUT-00231/genomes3/GUT_GENOME163483.gff.gz		2
GUT_GENOME163738	SchirmerM_2016__G89174__bin.16	CIBIO	MAG	2432511	173	23619	41.77	95.97	0.81		0	0	0	16		GUT_GENOME001027	MGYG-HGUT-00189	Coprococcus sp900066115	SRS1876712	SRP095580	Netherlands	Europe	ftp://ftp.ebi.ac.uk/pub/databases/metagenomics/mgnify_genomes/human-gut/v1.0/all_genomes/MGYG-HGUT-001/MGYG-HGUT-00189/genomes2/GUT_GENOME163738.gff.gz		4
GUT_GENOME163927	SchirmerM_2016__G89200__bin.25	CIBIO	MAG	2599619	196	18816	44.69	95.3	0.89		0	0	0	15		GUT_GENOME001379	MGYG-HGUT-00231	Coprococcus eutactus_A	SRS1876559	SRP095580	Netherlands	Europe	ftp://ftp.ebi.ac.uk/pub/databases/metagenomics/mgnify_genomes/human-gut/v1.0/all_genomes/MGYG-HGUT-002/MGYG-HGUT-00231/genomes3/GUT_GENOME163927.gff.gz		2
GUT_GENOME164006	SchirmerM_2016__G89259__bin.10	CIBIO	MAG	2828117	94	44226	44.28	98.66	0		0	0	0	15		GUT_GENOME001379	MGYG-HGUT-00231	Coprococcus eutactus_A	SRS1876693	SRP095580	Netherlands	Europe	ftp://ftp.ebi.ac.uk/pub/databases/metagenomics/mgnify_genomes/human-gut/v1.0/all_genomes/MGYG-HGUT-002/MGYG-HGUT-00231/genomes1/GUT_GENOME164006.gff.gz		2
GUT_GENOME164803	SRR1196610_bin.7	EBI	MAG	2862666	73	62329	44.26	95.97	0		0	23.22	0	15	ERZ983655	GUT_GENOME001379	MGYG-HGUT-00231	Coprococcus eutactus_A	SRS576034	SRP040146	United States	North America	ftp://ftp.ebi.ac.uk/pub/databases/metagenomics/mgnify_genomes/human-gut/v1.0/all_genomes/MGYG-HGUT-002/MGYG-HGUT-00231/genomes1/GUT_GENOME164803.gff.gz		2
GUT_GENOME165811	SRR1197584_bin.8	EBI	MAG	2821718	126	37273	44.33	97.74	0.67		0	0	10.74	15	ERZ985032	GUT_GENOME001379	MGYG-HGUT-00231	Coprococcus eutactus_A	SRS576042	SRP040146	United States	North America	ftp://ftp.ebi.ac.uk/pub/databases/metagenomics/mgnify_genomes/human-gut/v1.0/all_genomes/MGYG-HGUT-002/MGYG-HGUT-00231/genomes1/GUT_GENOME165811.gff.gz		2
GUT_GENOME166107	SRR1197623_bin.12	EBI	MAG	3029107	25	182240	43.95	99.33	0		0	25.11	0	18	ERZ985485	GUT_GENOME001379	MGYG-HGUT-00231	Coprococcus eutactus_A	SRS576028	SRP040146	United States	North America	ftp://ftp.ebi.ac.uk/pub/databases/metagenomics/mgnify_genomes/human-gut/v1.0/all_genomes/MGYG-HGUT-002/MGYG-HGUT-00231/genomes2/GUT_GENOME166107.gff.gz		2
GUT_GENOME166489	SRR1197762_bin.22	EBI	MAG	2959207	27	186115	44.07	99.33	0		0	0	0	18	ERZ985869	GUT_GENOME001379	MGYG-HGUT-00231	Coprococcus eutactus_A	SRS575987	SRP040146	United States	North America	ftp://ftp.ebi.ac.uk/pub/databases/metagenomics/mgnify_genomes/human-gut/v1.0/all_genomes/MGYG-HGUT-002/MGYG-HGUT-00231/genomes2/GUT_GENOME166489.gff.gz		2
GUT_GENOME167700	SRR1238145_bin.32	EBI	MAG	3007120	37	159384	43.89	98.99	0.71		0	0	0	14	ERZ836053	GUT_GENOME001379	MGYG-HGUT-00231	Coprococcus eutactus_A	SRS591939	SRP040956	Denmark	Europe	ftp://ftp.ebi.ac.uk/pub/databases/metagenomics/mgnify_genomes/human-gut/v1.0/all_genomes/MGYG-HGUT-002/MGYG-HGUT-00231/genomes1/GUT_GENOME167700.gff.gz		2
GUT_GENOME170568	SRR1761707_bin.21	EBI	MAG	2923561	30	153547	44.02	95.97	0		0	70.45	11.01	15	ERZ837847	GUT_GENOME001379	MGYG-HGUT-00231	Coprococcus eutactus_A	SRS820616	SRP052307	Peru	South America	ftp://ftp.ebi.ac.uk/pub/databases/metagenomics/mgnify_genomes/human-gut/v1.0/all_genomes/MGYG-HGUT-002/MGYG-HGUT-00231/genomes2/GUT_GENOME170568.gff.gz		2
GUT_GENOME175537	SRR2992882_bin.32	EBI	MAG	2703530	20	216724	44.11	96.64	0		0	24.27	0	17	ERZ862245	GUT_GENOME001379	MGYG-HGUT-00231	Coprococcus eutactus_A	SRS1205306	SRP067325	United States	North America	ftp://ftp.ebi.ac.uk/pub/databases/metagenomics/mgnify_genomes/human-gut/v1.0/all_genomes/MGYG-HGUT-002/MGYG-HGUT-00231/genomes3/GUT_GENOME175537.gff.gz		2
GUT_GENOME175569	SRR2992883_bin.34	EBI	MAG	2698346	16	358946	41.19	99.33	0.67		0	24.59	11.45	17	ERZ862269	GUT_GENOME001027	MGYG-HGUT-00189	Coprococcus sp900066115	SRS1205305	SRP067325	United States	North America	ftp://ftp.ebi.ac.uk/pub/databases/metagenomics/mgnify_genomes/human-gut/v1.0/all_genomes/MGYG-HGUT-001/MGYG-HGUT-00189/genomes1/GUT_GENOME175569.gff.gz		4
GUT_GENOME175692	SRR2992888_bin.20	EBI	MAG	2732311	30	166559	44.01	96.64	0		0	0	0	17	ERZ862415	GUT_GENOME001379	MGYG-HGUT-00231	Coprococcus eutactus_A	SRS1205300	SRP067325	United States	North America	ftp://ftp.ebi.ac.uk/pub/databases/metagenomics/mgnify_genomes/human-gut/v1.0/all_genomes/MGYG-HGUT-002/MGYG-HGUT-00231/genomes2/GUT_GENOME175692.gff.gz		2
GUT_GENOME175751	SRR2992890_bin.53	EBI	MAG	2841291	59	90383	43.24	95.97	0		0	0	11.45	19	ERZ862459	GUT_GENOME000055	MGYG-HGUT-00018	Coprococcus eutactus	SRS1205298	SRP067325	United States	North America	ftp://ftp.ebi.ac.uk/pub/databases/metagenomics/mgnify_genomes/human-gut/v1.0/all_genomes/MGYG-HGUT-000/MGYG-HGUT-00018/genomes1/GUT_GENOME175751.gff.gz		1
GUT_GENOME176061	SRR2992900_bin.5	EBI	MAG	2618125	23	174123	40.93	99.33	0		0	46.77	72.14	16	ERZ862804	GUT_GENOME103847	MGYG-HGUT-01707	Coprococcus sp000154245	SRS1205288	SRP067325	United States	North America	ftp://ftp.ebi.ac.uk/pub/databases/metagenomics/mgnify_genomes/human-gut/v1.0/all_genomes/MGYG-HGUT-017/MGYG-HGUT-01707/genomes1/GUT_GENOME176061.gff.gz		5
GUT_GENOME177647	SRR341589_bin.9	EBI	MAG	2410438	98	34961	41.61	95.85	0.67		0	19.5	8.58	12	ERZ863094	GUT_GENOME001027	MGYG-HGUT-00189	Coprococcus sp900066115	SRS259442	SRP008047	China	Asia	ftp://ftp.ebi.ac.uk/pub/databases/metagenomics/mgnify_genomes/human-gut/v1.0/all_genomes/MGYG-HGUT-001/MGYG-HGUT-00189/genomes1/GUT_GENOME177647.gff.gz		4
GUT_GENOME178036	SRR341647_bin.27	EBI	MAG	2639699	45	99156	41.26	96.64	0		0	0	11.21	13	ERZ863523	GUT_GENOME001027	MGYG-HGUT-00189	Coprococcus sp900066115	SRS259500	SRP008047	China	Asia	ftp://ftp.ebi.ac.uk/pub/databases/metagenomics/mgnify_genomes/human-gut/v1.0/all_genomes/MGYG-HGUT-001/MGYG-HGUT-00189/genomes2/GUT_GENOME178036.gff.gz		4
GUT_GENOME178928	SRR3496379_bin.19	EBI	MAG	2842463	35	125356	44.03	96.98	0.67		0	0	0	16	ERZ830214	GUT_GENOME001379	MGYG-HGUT-00231	Coprococcus eutactus_A	SRS1432719	SRP074801	United Kingdom	Europe	ftp://ftp.ebi.ac.uk/pub/databases/metagenomics/mgnify_genomes/human-gut/v1.0/all_genomes/MGYG-HGUT-002/MGYG-HGUT-00231/genomes1/GUT_GENOME178928.gff.gz		2
GUT_GENOME180238	SRR3737028_bin.46	EBI	MAG	2920632	28	172442	44.02	99.11	0		0	0	11.35	15	ERZ838956	GUT_GENOME001379	MGYG-HGUT-00231	Coprococcus eutactus_A	SRS1490042	SRP076119	United States	North America	ftp://ftp.ebi.ac.uk/pub/databases/metagenomics/mgnify_genomes/human-gut/v1.0/all_genomes/MGYG-HGUT-002/MGYG-HGUT-00231/genomes2/GUT_GENOME180238.gff.gz		2
GUT_GENOME186497	SRR4783393_bin.8	EBI	MAG	2556368	109	39130	44.49	96.64	0		0	0	0	15	ERZ978199	GUT_GENOME001379	MGYG-HGUT-00231	Coprococcus eutactus_A	SRS1771173	SRP091570	United States	North America	ftp://ftp.ebi.ac.uk/pub/databases/metagenomics/mgnify_genomes/human-gut/v1.0/all_genomes/MGYG-HGUT-002/MGYG-HGUT-00231/genomes1/GUT_GENOME186497.gff.gz		2
GUT_GENOME186763	SRR4783448_bin.69	EBI	MAG	2706485	21	247551	44.13	97.32	0		0	25.11	8.58	16	ERZ978480	GUT_GENOME001379	MGYG-HGUT-00231	Coprococcus eutactus_A	SRS1767346	SRP091570	United States	North America	ftp://ftp.ebi.ac.uk/pub/databases/metagenomics/mgnify_genomes/human-gut/v1.0/all_genomes/MGYG-HGUT-002/MGYG-HGUT-00231/genomes2/GUT_GENOME186763.gff.gz		2
GUT_GENOME187658	SRR5032288_bin.2	EBI	MAG	2751637	36	118967	44.21	99.33	0		0	23.22	5.37	16	ERZ846682	GUT_GENOME001379	MGYG-HGUT-00231	Coprococcus eutactus_A	SRS1806033	SRP093506	China	Asia	ftp://ftp.ebi.ac.uk/pub/databases/metagenomics/mgnify_genomes/human-gut/v1.0/all_genomes/MGYG-HGUT-002/MGYG-HGUT-00231/genomes3/GUT_GENOME187658.gff.gz		2
GUT_GENOME188557	SRR5056649_bin.87	EBI	MAG	2862889	36	184174	43.99	96.64	0.34		0	0	5.37	13	ERZ933973	GUT_GENOME001379	MGYG-HGUT-00231	Coprococcus eutactus_A	SRS1820197	SRP093965	United States	North America	ftp://ftp.ebi.ac.uk/pub/databases/metagenomics/mgnify_genomes/human-gut/v1.0/all_genomes/MGYG-HGUT-002/MGYG-HGUT-00231/genomes2/GUT_GENOME188557.gff.gz		2
GUT_GENOME189150	SRR5056693_bin.44	EBI	MAG	2565072	24	282152	44.22	98.66	0		0	0	0	15	ERZ934628	GUT_GENOME001379	MGYG-HGUT-00231	Coprococcus eutactus_A	SRS1820241	SRP093965	United States	North America	ftp://ftp.ebi.ac.uk/pub/databases/metagenomics/mgnify_genomes/human-gut/v1.0/all_genomes/MGYG-HGUT-002/MGYG-HGUT-00231/genomes1/GUT_GENOME189150.gff.gz		2
GUT_GENOME189635	SRR5056739_bin.21	EBI	MAG	2845540	42	90021	43.99	98.66	0		0	16.96	11.21	12	ERZ935191	GUT_GENOME001379	MGYG-HGUT-00231	Coprococcus eutactus_A	SRS1820284	SRP093965	United States	North America	ftp://ftp.ebi.ac.uk/pub/databases/metagenomics/mgnify_genomes/human-gut/v1.0/all_genomes/MGYG-HGUT-002/MGYG-HGUT-00231/genomes3/GUT_GENOME189635.gff.gz		2
GUT_GENOME190482	SRR5056797_bin.91	EBI	MAG	2811047	49	82553	44.02	98.29	0		0	0	0	11	ERZ936130	GUT_GENOME001379	MGYG-HGUT-00231	Coprococcus eutactus_A	SRS1820333	SRP093965	United States	North America	ftp://ftp.ebi.ac.uk/pub/databases/metagenomics/mgnify_genomes/human-gut/v1.0/all_genomes/MGYG-HGUT-002/MGYG-HGUT-00231/genomes3/GUT_GENOME190482.gff.gz		2
GUT_GENOME191475	SRR5056860_bin.97	EBI	MAG	2364604	38	97190	41.43	95.97	0.67		0	0	8.58	13	ERZ937305	GUT_GENOME001027	MGYG-HGUT-00189	Coprococcus sp900066115	SRS1820386	SRP093965	United States	North America	ftp://ftp.ebi.ac.uk/pub/databases/metagenomics/mgnify_genomes/human-gut/v1.0/all_genomes/MGYG-HGUT-001/MGYG-HGUT-00189/genomes2/GUT_GENOME191475.gff.gz		4
GUT_GENOME192351	SRR5056916_bin.6	EBI	MAG	2722846	138	29429	44.13	96.94	0.4		0	0	9.3	12	ERZ944298	GUT_GENOME001379	MGYG-HGUT-00231	Coprococcus eutactus_A	SRS1820429	SRP093965	United States	North America	ftp://ftp.ebi.ac.uk/pub/databases/metagenomics/mgnify_genomes/human-gut/v1.0/all_genomes/MGYG-HGUT-002/MGYG-HGUT-00231/genomes3/GUT_GENOME192351.gff.gz		2
GUT_GENOME192368	SRR5056917_bin.46	EBI	MAG	2643639	34	132448	44.33	98.29	0		0	0	10.74	18	ERZ944320	GUT_GENOME001379	MGYG-HGUT-00231	Coprococcus eutactus_A	SRS1820430	SRP093965	United States	North America	ftp://ftp.ebi.ac.uk/pub/databases/metagenomics/mgnify_genomes/human-gut/v1.0/all_genomes/MGYG-HGUT-002/MGYG-HGUT-00231/genomes2/GUT_GENOME192368.gff.gz		2
GUT_GENOME192962	SRR5056961_bin.26	EBI	MAG	2793925	29	152679	44.03	97.98	0.67		0	0	9.3	16	ERZ944978	GUT_GENOME001379	MGYG-HGUT-00231	Coprococcus eutactus_A	SRS1820462	SRP093965	United States	North America	ftp://ftp.ebi.ac.uk/pub/databases/metagenomics/mgnify_genomes/human-gut/v1.0/all_genomes/MGYG-HGUT-002/MGYG-HGUT-00231/genomes2/GUT_GENOME192962.gff.gz		2
GUT_GENOME193078	SRR5056973_bin.62	EBI	MAG	2496367	25	150575	41.22	95.97	0		0	0	0	12	ERZ945091	GUT_GENOME001027	MGYG-HGUT-00189	Coprococcus sp900066115	SRS1820470	SRP093965	United States	North America	ftp://ftp.ebi.ac.uk/pub/databases/metagenomics/mgnify_genomes/human-gut/v1.0/all_genomes/MGYG-HGUT-001/MGYG-HGUT-00189/genomes2/GUT_GENOME193078.gff.gz		4
GUT_GENOME193475	SRR5057027_bin.9	EBI	MAG	2819291	43	123347	40.21	97.32	0.22		0	0	0	16	ERZ945513	GUT_GENOME103847	MGYG-HGUT-01707	Coprococcus sp000154245	SRS1820451	SRP093965	United States	North America	ftp://ftp.ebi.ac.uk/pub/databases/metagenomics/mgnify_genomes/human-gut/v1.0/all_genomes/MGYG-HGUT-017/MGYG-HGUT-01707/genomes1/GUT_GENOME193475.gff.gz		5
GUT_GENOME193646	SRR5057037_bin.44	EBI	MAG	2464001	30	113965	41.43	98.66	0.12		0	0	0	13	ERZ945687	GUT_GENOME001027	MGYG-HGUT-00189	Coprococcus sp900066115	SRS1820255	SRP093965	United States	North America	ftp://ftp.ebi.ac.uk/pub/databases/metagenomics/mgnify_genomes/human-gut/v1.0/all_genomes/MGYG-HGUT-001/MGYG-HGUT-00189/genomes1/GUT_GENOME193646.gff.gz		4
GUT_GENOME193767	SRR5057045_bin.75	EBI	MAG	2893931	47	84263	44.01	99.33	0.31		0	0	10.29	14	ERZ945808	GUT_GENOME001379	MGYG-HGUT-00231	Coprococcus eutactus_A	SRS1820516	SRP093965	United States	North America	ftp://ftp.ebi.ac.uk/pub/databases/metagenomics/mgnify_genomes/human-gut/v1.0/all_genomes/MGYG-HGUT-002/MGYG-HGUT-00231/genomes3/GUT_GENOME193767.gff.gz		2
GUT_GENOME194465	SRR5057111_bin.62	EBI	MAG	2828770	66	79748	44.03	95.64	0.67		0	25.11	9.3	12	ERZ946626	GUT_GENOME001379	MGYG-HGUT-00231	Coprococcus eutactus_A	SRS1820554	SRP093965	United States	North America	ftp://ftp.ebi.ac.uk/pub/databases/metagenomics/mgnify_genomes/human-gut/v1.0/all_genomes/MGYG-HGUT-002/MGYG-HGUT-00231/genomes2/GUT_GENOME194465.gff.gz		2
GUT_GENOME194478	SRR5057112_bin.111	EBI	MAG	2648183	27	221514	44.24	99.33	0		0	0	0	16	ERZ946684	GUT_GENOME001379	MGYG-HGUT-00231	Coprococcus eutactus_A	SRS1820555	SRP093965	United States	North America	ftp://ftp.ebi.ac.uk/pub/databases/metagenomics/mgnify_genomes/human-gut/v1.0/all_genomes/MGYG-HGUT-002/MGYG-HGUT-00231/genomes2/GUT_GENOME194478.gff.gz		2
GUT_GENOME194570	SRR5057119_bin.34	EBI	MAG	2933300	15	239103	43.53	99.33	0.31		0	0	10.29	16	ERZ946803	GUT_GENOME001379	MGYG-HGUT-00231	Coprococcus eutactus_A	SRS1820301	SRP093965	United States	North America	ftp://ftp.ebi.ac.uk/pub/databases/metagenomics/mgnify_genomes/human-gut/v1.0/all_genomes/MGYG-HGUT-002/MGYG-HGUT-00231/genomes2/GUT_GENOME194570.gff.gz		2
GUT_GENOME195922	SRR5127409_bin.12	EBI	MAG	2534716	214	17901	44.67	97.05	0.89		0	0	0	12	ERZ931112	GUT_GENOME001379	MGYG-HGUT-00231	Coprococcus eutactus_A	SRS1876276	SRP095580	Netherlands	Europe	ftp://ftp.ebi.ac.uk/pub/databases/metagenomics/mgnify_genomes/human-gut/v1.0/all_genomes/MGYG-HGUT-002/MGYG-HGUT-00231/genomes2/GUT_GENOME195922.gff.gz		2
GUT_GENOME196065	SRR5127428_bin.21	EBI	MAG	2681677	49	101157	41.49	99.33	0.34		0	0	8.55	16	ERZ931254	GUT_GENOME001027	MGYG-HGUT-00189	Coprococcus sp900066115	SRS1876295	SRP095580	Netherlands	Europe	ftp://ftp.ebi.ac.uk/pub/databases/metagenomics/mgnify_genomes/human-gut/v1.0/all_genomes/MGYG-HGUT-001/MGYG-HGUT-00189/genomes2/GUT_GENOME196065.gff.gz		4
GUT_GENOME196289	SRR5127465_bin.9	EBI	MAG	2745034	101	41478	44.45	95.3	0		0	0	0	17	ERZ931490	GUT_GENOME001379	MGYG-HGUT-00231	Coprococcus eutactus_A	SRS1876333	SRP095580	Netherlands	Europe	ftp://ftp.ebi.ac.uk/pub/databases/metagenomics/mgnify_genomes/human-gut/v1.0/all_genomes/MGYG-HGUT-002/MGYG-HGUT-00231/genomes4/GUT_GENOME196289.gff.gz		2
GUT_GENOME196432	SRR5127491_bin.22	EBI	MAG	2858645	82	51308	43.99	97.77	0		0	0	11.21	13	ERZ931647	GUT_GENOME001379	MGYG-HGUT-00231	Coprococcus eutactus_A	SRS1876358	SRP095580	Netherlands	Europe	ftp://ftp.ebi.ac.uk/pub/databases/metagenomics/mgnify_genomes/human-gut/v1.0/all_genomes/MGYG-HGUT-002/MGYG-HGUT-00231/genomes3/GUT_GENOME196432.gff.gz		2
GUT_GENOME196567	SRR5127512_bin.3	EBI	MAG	2974912	27	160357	43.91	99.33	0		0	70.71	11.35	16	ERZ931797	GUT_GENOME001379	MGYG-HGUT-00231	Coprococcus eutactus_A	SRS1876379	SRP095580	Netherlands	Europe	ftp://ftp.ebi.ac.uk/pub/databases/metagenomics/mgnify_genomes/human-gut/v1.0/all_genomes/MGYG-HGUT-002/MGYG-HGUT-00231/genomes2/GUT_GENOME196567.gff.gz		2
GUT_GENOME196665	SRR5127532_bin.9	EBI	MAG	2834150	60	75128	44.14	97.99	0		0	0	11.21	15	ERZ931896	GUT_GENOME001379	MGYG-HGUT-00231	Coprococcus eutactus_A	SRS1876399	SRP095580	Netherlands	Europe	ftp://ftp.ebi.ac.uk/pub/databases/metagenomics/mgnify_genomes/human-gut/v1.0/all_genomes/MGYG-HGUT-002/MGYG-HGUT-00231/genomes1/GUT_GENOME196665.gff.gz		2
GUT_GENOME196832	SRR5127572_bin.15	EBI	MAG	2845385	33	139685	44.12	99.33	0		0	0	11.21	16	ERZ932082	GUT_GENOME001379	MGYG-HGUT-00231	Coprococcus eutactus_A	SRS1876439	SRP095580	Netherlands	Europe	ftp://ftp.ebi.ac.uk/pub/databases/metagenomics/mgnify_genomes/human-gut/v1.0/all_genomes/MGYG-HGUT-002/MGYG-HGUT-00231/genomes2/GUT_GENOME196832.gff.gz		2
GUT_GENOME197057	SRR5127627_bin.3	EBI	MAG	2939477	50	87332	44.12	98.66	0		0	0	11.35	16	ERZ932319	GUT_GENOME001379	MGYG-HGUT-00231	Coprococcus eutactus_A	SRS1876494	SRP095580	Netherlands	Europe	ftp://ftp.ebi.ac.uk/pub/databases/metagenomics/mgnify_genomes/human-gut/v1.0/all_genomes/MGYG-HGUT-002/MGYG-HGUT-00231/genomes3/GUT_GENOME197057.gff.gz		2
GUT_GENOME197173	SRR5127652_bin.25	EBI	MAG	2878942	44	113850	44.17	99.33	0.18		0	0	11.35	17	ERZ932434	GUT_GENOME001379	MGYG-HGUT-00231	Coprococcus eutactus_A	SRS1876519	SRP095580	Netherlands	Europe	ftp://ftp.ebi.ac.uk/pub/databases/metagenomics/mgnify_genomes/human-gut/v1.0/all_genomes/MGYG-HGUT-002/MGYG-HGUT-00231/genomes3/GUT_GENOME197173.gff.gz		2
GUT_GENOME197333	SRR5127682_bin.1	EBI	MAG	2654817	66	55160	44.49	98.29	0		0	0	11.21	14	ERZ932621	GUT_GENOME001379	MGYG-HGUT-00231	Coprococcus eutactus_A	SRS1876549	SRP095580	Netherlands	Europe	ftp://ftp.ebi.ac.uk/pub/databases/metagenomics/mgnify_genomes/human-gut/v1.0/all_genomes/MGYG-HGUT-002/MGYG-HGUT-00231/genomes4/GUT_GENOME197333.gff.gz		2
GUT_GENOME197386	SRR5127687_bin.5	EBI	MAG	3012234	67	64154	43.96	99.08	0		0	0	11.21	15	ERZ932670	GUT_GENOME001379	MGYG-HGUT-00231	Coprococcus eutactus_A	SRS1876554	SRP095580	Netherlands	Europe	ftp://ftp.ebi.ac.uk/pub/databases/metagenomics/mgnify_genomes/human-gut/v1.0/all_genomes/MGYG-HGUT-002/MGYG-HGUT-00231/genomes1/GUT_GENOME197386.gff.gz		2
GUT_GENOME197749	SRR5127743_bin.2	EBI	MAG	2753315	96	44211	44.44	95.97	0		0	0	9.3	13	ERZ933165	GUT_GENOME001379	MGYG-HGUT-00231	Coprococcus eutactus_A	SRS1876610	SRP095580	Netherlands	Europe	ftp://ftp.ebi.ac.uk/pub/databases/metagenomics/mgnify_genomes/human-gut/v1.0/all_genomes/MGYG-HGUT-002/MGYG-HGUT-00231/genomes2/GUT_GENOME197749.gff.gz		2
GUT_GENOME197978	SRR5127781_bin.1	EBI	MAG	2704732	88	55415	44.44	96.64	0		0	0	10.74	16	ERZ933410	GUT_GENOME001379	MGYG-HGUT-00231	Coprococcus eutactus_A	SRS1876647	SRP095580	Netherlands	Europe	ftp://ftp.ebi.ac.uk/pub/databases/metagenomics/mgnify_genomes/human-gut/v1.0/all_genomes/MGYG-HGUT-002/MGYG-HGUT-00231/genomes1/GUT_GENOME197978.gff.gz		2
GUT_GENOME199213	SRR5275459_bin.2	EBI	MAG	2660825	153	24624	44.31	95.24	0		0	9.26	0	17	ERZ843485	GUT_GENOME001379	MGYG-HGUT-00231	Coprococcus eutactus_A	SRS1993586	SRP100446	United States	North America	ftp://ftp.ebi.ac.uk/pub/databases/metagenomics/mgnify_genomes/human-gut/v1.0/all_genomes/MGYG-HGUT-002/MGYG-HGUT-00231/genomes2/GUT_GENOME199213.gff.gz		2
GUT_GENOME199733	SRR5279231_bin.29	EBI	MAG	2530851	62	57200	41.58	99.33	0.67		0	0	9.06	16	ERZ845128	GUT_GENOME001027	MGYG-HGUT-00189	Coprococcus sp900066115	SRS1997009	SRP100575	China	Asia	ftp://ftp.ebi.ac.uk/pub/databases/metagenomics/mgnify_genomes/human-gut/v1.0/all_genomes/MGYG-HGUT-001/MGYG-HGUT-00189/genomes1/GUT_GENOME199733.gff.gz		4
GUT_GENOME200954	SRR5558002_bin.47	EBI	MAG	2569319	28	107038	41.49	99.33	0		0	24.27	11.45	16	ERZ969383	GUT_GENOME001027	MGYG-HGUT-00189	Coprococcus sp900066115	SRS1996016	SRP100518	Spain	Europe	ftp://ftp.ebi.ac.uk/pub/databases/metagenomics/mgnify_genomes/human-gut/v1.0/all_genomes/MGYG-HGUT-001/MGYG-HGUT-00189/genomes2/GUT_GENOME200954.gff.gz		4
GUT_GENOME201015	SRR5558009_bin.14	EBI	MAG	2947398	33	157660	43.99	99.33	0		0	0	11.45	17	ERZ969472	GUT_GENOME001379	MGYG-HGUT-00231	Coprococcus eutactus_A	SRS1996016	SRP100518	Spain	Europe	ftp://ftp.ebi.ac.uk/pub/databases/metagenomics/mgnify_genomes/human-gut/v1.0/all_genomes/MGYG-HGUT-002/MGYG-HGUT-00231/genomes3/GUT_GENOME201015.gff.gz		2
GUT_GENOME203498	SRR5558243_bin.36	EBI	MAG	2874089	32	130093	43	99.33	0.67		0	99.74	18.39	19	ERZ972243	GUT_GENOME000055	MGYG-HGUT-00018	Coprococcus eutactus	SRS1996016	SRP100518	Spain	Europe	ftp://ftp.ebi.ac.uk/pub/databases/metagenomics/mgnify_genomes/human-gut/v1.0/all_genomes/MGYG-HGUT-000/MGYG-HGUT-00018/genomes1/GUT_GENOME203498.gff.gz		1
GUT_GENOME205169	SRR5558411_bin.82	EBI	MAG	2415556	28	124981	41.77	99.33	0		0	24.59	0	17	ERZ974050	GUT_GENOME140272	MGYG-HGUT-02289	Coprococcus sp000433075	SRS1996016	SRP100518	Spain	Europe	ftp://ftp.ebi.ac.uk/pub/databases/metagenomics/mgnify_genomes/human-gut/v1.0/all_genomes/MGYG-HGUT-022/MGYG-HGUT-02289/genomes1/GUT_GENOME205169.gff.gz		8
GUT_GENOME207039	SRR585728_bin.13	EBI	MAG	2788871	82	53222	44.2	97.44	0.67		0	0	11.38	15	ERZ831545	GUT_GENOME001379	MGYG-HGUT-00231	Coprococcus eutactus_A	SRS367829	SRP016067	Sweden	Europe	ftp://ftp.ebi.ac.uk/pub/databases/metagenomics/mgnify_genomes/human-gut/v1.0/all_genomes/MGYG-HGUT-002/MGYG-HGUT-00231/genomes2/GUT_GENOME207039.gff.gz		2
GUT_GENOME207188	SRR585765_bin.31	EBI	MAG	2776404	39	102100	42.98	99.33	0.84		0	46.31	0	16	ERZ831722	GUT_GENOME000055	MGYG-HGUT-00018	Coprococcus eutactus	SRS367863	SRP016067	Sweden	Europe	ftp://ftp.ebi.ac.uk/pub/databases/metagenomics/mgnify_genomes/human-gut/v1.0/all_genomes/MGYG-HGUT-000/MGYG-HGUT-00018/genomes1/GUT_GENOME207188.gff.gz		1
GUT_GENOME207208	SRR585786_bin.21	EBI	MAG	2540403	36	132463	41.27	96.06	0.67		0	0	5.33	13	ERZ831764	GUT_GENOME001027	MGYG-HGUT-00189	Coprococcus sp900066115	SRS367866	SRP016067	Sweden	Europe	ftp://ftp.ebi.ac.uk/pub/databases/metagenomics/mgnify_genomes/human-gut/v1.0/all_genomes/MGYG-HGUT-001/MGYG-HGUT-00189/genomes1/GUT_GENOME207208.gff.gz		4
GUT_GENOME208210	SRR6028164_bin.15	EBI	MAG	2525096	69	66077	41.38	95.97	0		0	0	11.21	15	ERZ979118	GUT_GENOME001027	MGYG-HGUT-00189	Coprococcus sp000154245	SRS1905917	SRP096283	United States	North America	ftp://ftp.ebi.ac.uk/pub/databases/metagenomics/mgnify_genomes/human-gut/v1.0/all_genomes/MGYG-HGUT-001/MGYG-HGUT-00189/genomes1/GUT_GENOME208210.gff.gz		5
GUT_GENOME208252	SRR6028167_bin.27	EBI	MAG	2613254	45	101940	41.39	99.33	0		0	25.11	10.74	16	ERZ979157	GUT_GENOME001027	MGYG-HGUT-00189	Coprococcus sp900066115	SRS1914285	SRP096283	United States	North America	ftp://ftp.ebi.ac.uk/pub/databases/metagenomics/mgnify_genomes/human-gut/v1.0/all_genomes/MGYG-HGUT-001/MGYG-HGUT-00189/genomes2/GUT_GENOME208252.gff.gz		4
GUT_GENOME208389	SRR6028181_bin.28	EBI	MAG	2667109	53	76520	44.34	98.66	0.34		0	0	0	17	ERZ979306	GUT_GENOME001379	MGYG-HGUT-00231	Coprococcus eutactus_A	SRS1905985	SRP096283	United States	North America	ftp://ftp.ebi.ac.uk/pub/databases/metagenomics/mgnify_genomes/human-gut/v1.0/all_genomes/MGYG-HGUT-002/MGYG-HGUT-00231/genomes4/GUT_GENOME208389.gff.gz		2
GUT_GENOME208418	SRR6028184_bin.21	EBI	MAG	2541346	60	56493	44.44	96.89	0		0	0	11.21	17	ERZ979333	GUT_GENOME001379	MGYG-HGUT-00231	Coprococcus eutactus_A	SRS1905787	SRP096283	United States	North America	ftp://ftp.ebi.ac.uk/pub/databases/metagenomics/mgnify_genomes/human-gut/v1.0/all_genomes/MGYG-HGUT-002/MGYG-HGUT-00231/genomes1/GUT_GENOME208418.gff.gz		2
GUT_GENOME208494	SRR6028194_bin.11	EBI	MAG	2408854	203	18010	41.86	95.3	0.22		0	0	0	14	ERZ979416	GUT_GENOME001027	MGYG-HGUT-00189	Coprococcus sp900066115	SRS1905740	SRP096283	United States	North America	ftp://ftp.ebi.ac.uk/pub/databases/metagenomics/mgnify_genomes/human-gut/v1.0/all_genomes/MGYG-HGUT-001/MGYG-HGUT-00189/genomes2/GUT_GENOME208494.gff.gz		4
GUT_GENOME208605	SRR6028217_bin.5	EBI	MAG	2520271	44	85334	41.49	98.66	0		0	0	0	14	ERZ979527	GUT_GENOME001027	MGYG-HGUT-00189	Coprococcus sp900066115	SRS1905975	SRP096283	United States	North America	ftp://ftp.ebi.ac.uk/pub/databases/metagenomics/mgnify_genomes/human-gut/v1.0/all_genomes/MGYG-HGUT-001/MGYG-HGUT-00189/genomes2/GUT_GENOME208605.gff.gz		4
GUT_GENOME208614	SRR6028219_bin.25	EBI	MAG	2466870	114	32217	41.66	97.15	0		0	0	0	11	ERZ979538	GUT_GENOME001027	MGYG-HGUT-00189	Coprococcus sp900066115	SRS1905672	SRP096283	United States	North America	ftp://ftp.ebi.ac.uk/pub/databases/metagenomics/mgnify_genomes/human-gut/v1.0/all_genomes/MGYG-HGUT-001/MGYG-HGUT-00189/genomes1/GUT_GENOME208614.gff.gz		4
GUT_GENOME208723	SRR6028236_bin.4	EBI	MAG	2650013	88	51333	41.41	97.02	0		0	22.9	0	13	ERZ979653	GUT_GENOME001027	MGYG-HGUT-00189	Coprococcus sp000154245	SRS1905607	SRP096283	United States	North America	ftp://ftp.ebi.ac.uk/pub/databases/metagenomics/mgnify_genomes/human-gut/v1.0/all_genomes/MGYG-HGUT-001/MGYG-HGUT-00189/genomes1/GUT_GENOME208723.gff.gz		5
GUT_GENOME208727	SRR6028238_bin.12	EBI	MAG	2904493	28	150034	44.14	97.99	0.67		0	0	10.74	16	ERZ979659	GUT_GENOME001379	MGYG-HGUT-00231	Coprococcus eutactus_A	SRS1905628	SRP096283	United States	North America	ftp://ftp.ebi.ac.uk/pub/databases/metagenomics/mgnify_genomes/human-gut/v1.0/all_genomes/MGYG-HGUT-002/MGYG-HGUT-00231/genomes3/GUT_GENOME208727.gff.gz		2
GUT_GENOME208743	SRR6028239_bin.9	EBI	MAG	2917903	59	77651	44.16	97.63	0		0	46.58	0	17	ERZ979672	GUT_GENOME001379	MGYG-HGUT-00231	Coprococcus eutactus_A	SRS1905543	SRP096283	United States	North America	ftp://ftp.ebi.ac.uk/pub/databases/metagenomics/mgnify_genomes/human-gut/v1.0/all_genomes/MGYG-HGUT-002/MGYG-HGUT-00231/genomes2/GUT_GENOME208743.gff.gz		2
GUT_GENOME208924	SRR6028280_bin.13	EBI	MAG	2949835	68	69983	43.98	99.33	0		0	0	11.35	16	ERZ979870	GUT_GENOME001379	MGYG-HGUT-00231	Coprococcus eutactus_A	SRS1905995	SRP096283	United States	North America	ftp://ftp.ebi.ac.uk/pub/databases/metagenomics/mgnify_genomes/human-gut/v1.0/all_genomes/MGYG-HGUT-002/MGYG-HGUT-00231/genomes3/GUT_GENOME208924.gff.gz		2
GUT_GENOME209256	SRR6028327_bin.8	EBI	MAG	2593434	82	52818	41.7	97.76	0.67		0	46.58	5.78	16	ERZ980214	GUT_GENOME103847	MGYG-HGUT-01707	Coprococcus sp900066115	SRS1905908	SRP096283	United States	North America	ftp://ftp.ebi.ac.uk/pub/databases/metagenomics/mgnify_genomes/human-gut/v1.0/all_genomes/MGYG-HGUT-017/MGYG-HGUT-01707/genomes1/GUT_GENOME209256.gff.gz		4
GUT_GENOME209341	SRR6028345_bin.12	EBI	MAG	2590042	103	40815	41.18	98.66	0		0	0	5.78	16	ERZ980314	GUT_GENOME103847	MGYG-HGUT-01707	Coprococcus sp000154245	SRS1905968	SRP096283	United States	North America	ftp://ftp.ebi.ac.uk/pub/databases/metagenomics/mgnify_genomes/human-gut/v1.0/all_genomes/MGYG-HGUT-017/MGYG-HGUT-01707/genomes1/GUT_GENOME209341.gff.gz		5
GUT_GENOME209369	SRR6028346_bin.3	EBI	MAG	2601066	77	49433	41.31	98.66	0		0	21.27	0	13	ERZ980332	GUT_GENOME001027	MGYG-HGUT-00189	Coprococcus sp000154245	SRS1905517	SRP096283	United States	North America	ftp://ftp.ebi.ac.uk/pub/databases/metagenomics/mgnify_genomes/human-gut/v1.0/all_genomes/MGYG-HGUT-001/MGYG-HGUT-00189/genomes1/GUT_GENOME209369.gff.gz		5
GUT_GENOME209533	SRR6028375_bin.28	EBI	MAG	2567842	50	75389	41.51	98.66	0		0	0	5.78	15	ERZ980515	GUT_GENOME001027	MGYG-HGUT-00189	Coprococcus sp900066115	SRS1905789	SRP096283	United States	North America	ftp://ftp.ebi.ac.uk/pub/databases/metagenomics/mgnify_genomes/human-gut/v1.0/all_genomes/MGYG-HGUT-001/MGYG-HGUT-00189/genomes1/GUT_GENOME209533.gff.gz		4
GUT_GENOME209678	SRR6028399_bin.6	EBI	MAG	2578883	132	27297	44.55	95.97	0		0	0	11.21	16	ERZ980664	GUT_GENOME001379	MGYG-HGUT-00231	Coprococcus eutactus_A	SRS1905746	SRP096283	United States	North America	ftp://ftp.ebi.ac.uk/pub/databases/metagenomics/mgnify_genomes/human-gut/v1.0/all_genomes/MGYG-HGUT-002/MGYG-HGUT-00231/genomes2/GUT_GENOME209678.gff.gz		2
GUT_GENOME209754	SRR6028407_bin.2	EBI	MAG	2638872	91	38671	44.45	95.97	0		0	25.11	0	16	ERZ980736	GUT_GENOME001379	MGYG-HGUT-00231	Coprococcus eutactus_A	SRS1905852	SRP096283	United States	North America	ftp://ftp.ebi.ac.uk/pub/databases/metagenomics/mgnify_genomes/human-gut/v1.0/all_genomes/MGYG-HGUT-002/MGYG-HGUT-00231/genomes4/GUT_GENOME209754.gff.gz		2
GUT_GENOME210094	SRR6028470_bin.7	EBI	MAG	2863717	39	111935	43.1	99.33	0		0	0	10.74	17	ERZ981096	GUT_GENOME000055	MGYG-HGUT-00018	Coprococcus eutactus	SRS1905614	SRP096283	United States	North America	ftp://ftp.ebi.ac.uk/pub/databases/metagenomics/mgnify_genomes/human-gut/v1.0/all_genomes/MGYG-HGUT-000/MGYG-HGUT-00018/genomes1/GUT_GENOME210094.gff.gz		1
GUT_GENOME210107	SRR6028474_bin.17	EBI	MAG	2871169	167	28421	44.38	96.53	0.6		0	0	0	12	ERZ981119	GUT_GENOME001379	MGYG-HGUT-00231	Coprococcus eutactus_A	SRS1905729	SRP096283	United States	North America	ftp://ftp.ebi.ac.uk/pub/databases/metagenomics/mgnify_genomes/human-gut/v1.0/all_genomes/MGYG-HGUT-002/MGYG-HGUT-00231/genomes2/GUT_GENOME210107.gff.gz		2
GUT_GENOME210689	SRR6028570_bin.20	EBI	MAG	2565910	126	33046	41.61	95.97	0.67		0	0	0	14	ERZ981729	GUT_GENOME103847	MGYG-HGUT-01707	Coprococcus sp000154245	SRS1905759	SRP096283	United States	North America	ftp://ftp.ebi.ac.uk/pub/databases/metagenomics/mgnify_genomes/human-gut/v1.0/all_genomes/MGYG-HGUT-017/MGYG-HGUT-01707/genomes1/GUT_GENOME210689.gff.gz		5
GUT_GENOME210738	SRR6028576_bin.1	EBI	MAG	2775517	39	140658	44.2	97.99	0		0	0	11.21	17	ERZ981784	GUT_GENOME001379	MGYG-HGUT-00231	Coprococcus eutactus_A	SRS1905972	SRP096283	United States	North America	ftp://ftp.ebi.ac.uk/pub/databases/metagenomics/mgnify_genomes/human-gut/v1.0/all_genomes/MGYG-HGUT-002/MGYG-HGUT-00231/genomes2/GUT_GENOME210738.gff.gz		2
GUT_GENOME210750	SRR6028577_bin.28	EBI	MAG	2816441	71	58555	44.22	95.3	0		0	15.2	11.21	16	ERZ981796	GUT_GENOME001379	MGYG-HGUT-00231	Coprococcus eutactus_A	SRS1905808	SRP096283	United States	North America	ftp://ftp.ebi.ac.uk/pub/databases/metagenomics/mgnify_genomes/human-gut/v1.0/all_genomes/MGYG-HGUT-002/MGYG-HGUT-00231/genomes3/GUT_GENOME210750.gff.gz		2
GUT_GENOME210765	SRR6028579_bin.9	EBI	MAG	2799787	59	80583	44.16	98.99	0		0	0	11.21	16	ERZ981808	GUT_GENOME001379	MGYG-HGUT-00231	Coprococcus eutactus_A	SRS1905993	SRP096283	United States	North America	ftp://ftp.ebi.ac.uk/pub/databases/metagenomics/mgnify_genomes/human-gut/v1.0/all_genomes/MGYG-HGUT-002/MGYG-HGUT-00231/genomes4/GUT_GENOME210765.gff.gz		2
GUT_GENOME212478	SRR769510_bin.4	EBI	MAG	2611979	146	27592	44.48	95.68	0.78		0	0	11.38	15	ERZ831017	GUT_GENOME001379	MGYG-HGUT-00231	Coprococcus eutactus_A	SRS399325	SRP019038	United States	North America	ftp://ftp.ebi.ac.uk/pub/databases/metagenomics/mgnify_genomes/human-gut/v1.0/all_genomes/MGYG-HGUT-002/MGYG-HGUT-00231/genomes3/GUT_GENOME212478.gff.gz		2
GUT_GENOME212642	SRR769525_bin.48	EBI	MAG	2465550	105	40742	41.25	95.97	0.67		0	0	0	11	ERZ831221	GUT_GENOME103847	MGYG-HGUT-01707	Coprococcus sp000154245	SRS399334	SRP019038	United States	North America	ftp://ftp.ebi.ac.uk/pub/databases/metagenomics/mgnify_genomes/human-gut/v1.0/all_genomes/MGYG-HGUT-017/MGYG-HGUT-01707/genomes1/GUT_GENOME212642.gff.gz		5
GUT_GENOME213075	SRS011271_76	HGM	MAG	2505079	88	48483	44.47	95.97	0.22		0	0	0	14		GUT_GENOME001379	MGYG-HGUT-00231	Coprococcus eutactus_A	SRS011271	SRP002163	United States	North America	ftp://ftp.ebi.ac.uk/pub/databases/metagenomics/mgnify_genomes/human-gut/v1.0/all_genomes/MGYG-HGUT-002/MGYG-HGUT-00231/genomes1/GUT_GENOME213075.gff.gz		2
GUT_GENOME213139	SRS011529_5	HGM	MAG	2715326	83	93443	41.17	95.3	0		0	0	0	17		GUT_GENOME001027	MGYG-HGUT-00189	Coprococcus sp900066115	SRS011529	SRP175119	United States	North America	ftp://ftp.ebi.ac.uk/pub/databases/metagenomics/mgnify_genomes/human-gut/v1.0/all_genomes/MGYG-HGUT-001/MGYG-HGUT-00189/genomes1/GUT_GENOME213139.gff.gz		4
GUT_GENOME213201	SRS012273_81	HGM	MAG	2611891	62	57565	44.42	98.21	0		0	0	0	15		GUT_GENOME001379	MGYG-HGUT-00231	Coprococcus eutactus_A	SRS012273	SRP002163	United States	North America	ftp://ftp.ebi.ac.uk/pub/databases/metagenomics/mgnify_genomes/human-gut/v1.0/all_genomes/MGYG-HGUT-002/MGYG-HGUT-00231/genomes3/GUT_GENOME213201.gff.gz		2
GUT_GENOME214253	SRS017103_69	HGM	MAG	2514533	185	20234	44.63	95.3	0.22		0	22.31	0	14		GUT_GENOME001379	MGYG-HGUT-00231	Coprococcus eutactus_A	SRS017103	SRP002163	United States	North America	ftp://ftp.ebi.ac.uk/pub/databases/metagenomics/mgnify_genomes/human-gut/v1.0/all_genomes/MGYG-HGUT-002/MGYG-HGUT-00231/genomes1/GUT_GENOME214253.gff.gz		2
GUT_GENOME214802	SRS020233_18	HGM	MAG	2596431	44	97171	44.25	98.66	0		0	0	11.42	18		GUT_GENOME001379	MGYG-HGUT-00231	Coprococcus eutactus_A	SRS020233	SRP002163	United States	North America	ftp://ftp.ebi.ac.uk/pub/databases/metagenomics/mgnify_genomes/human-gut/v1.0/all_genomes/MGYG-HGUT-002/MGYG-HGUT-00231/genomes2/GUT_GENOME214802.gff.gz		2
GUT_GENOME215021	SRS022071_23	HGM	MAG	2540746	106	33115	44.6	96.98	0		0	0	0	14		GUT_GENOME001379	MGYG-HGUT-00231	Coprococcus eutactus_A	SRS022071	SRP002163	United States	North America	ftp://ftp.ebi.ac.uk/pub/databases/metagenomics/mgnify_genomes/human-gut/v1.0/all_genomes/MGYG-HGUT-002/MGYG-HGUT-00231/genomes3/GUT_GENOME215021.gff.gz		2
GUT_GENOME215736	SRS047014_79	HGM	MAG	2636390	45	107278	44.36	98.66	0		0	0	5.44	18		GUT_GENOME001379	MGYG-HGUT-00231	Coprococcus eutactus_A	SRS047014	SRP002163	United States	North America	ftp://ftp.ebi.ac.uk/pub/databases/metagenomics/mgnify_genomes/human-gut/v1.0/all_genomes/MGYG-HGUT-002/MGYG-HGUT-00231/genomes2/GUT_GENOME215736.gff.gz		2
GUT_GENOME215848	SRS049164_33	HGM	MAG	2737411	29	115077	44.21	99.33	0		0	0	5.44	17		GUT_GENOME001379	MGYG-HGUT-00231	Coprococcus eutactus_A	SRS049164	SRP002163	United States	North America	ftp://ftp.ebi.ac.uk/pub/databases/metagenomics/mgnify_genomes/human-gut/v1.0/all_genomes/MGYG-HGUT-002/MGYG-HGUT-00231/genomes3/GUT_GENOME215848.gff.gz		2
GUT_GENOME216232	SRS052697_8	HGM	MAG	2495919	271	13054	44.49	95.27	0.56		0	0	0	14		GUT_GENOME001379	MGYG-HGUT-00231	Coprococcus eutactus_A	SRS052697	SRP002163	United States	North America	ftp://ftp.ebi.ac.uk/pub/databases/metagenomics/mgnify_genomes/human-gut/v1.0/all_genomes/MGYG-HGUT-002/MGYG-HGUT-00231/genomes2/GUT_GENOME216232.gff.gz		2
GUT_GENOME216494	SRS056273_9	HGM	MAG	2768015	81	91685	41.33	95.3	0		0	0	10.67	16		GUT_GENOME001027	MGYG-HGUT-00189	Coprococcus sp900066115	SRS056273	SRP175119	United States	North America	ftp://ftp.ebi.ac.uk/pub/databases/metagenomics/mgnify_genomes/human-gut/v1.0/all_genomes/MGYG-HGUT-001/MGYG-HGUT-00189/genomes1/GUT_GENOME216494.gff.gz		4
GUT_GENOME216624	SRS063040_31	HGM	MAG	2593469	90	37255	44.35	98.29	0		0	0	0	16		GUT_GENOME001379	MGYG-HGUT-00231	Coprococcus eutactus_A	SRS063040	SRP002163	United States	North America	ftp://ftp.ebi.ac.uk/pub/databases/metagenomics/mgnify_genomes/human-gut/v1.0/all_genomes/MGYG-HGUT-002/MGYG-HGUT-00231/genomes2/GUT_GENOME216624.gff.gz		2
GUT_GENOME217894	SRS104400_58	HGM	MAG	2899412	31	153492	44.01	97.99	0		0	0	0	19		GUT_GENOME001379	MGYG-HGUT-00231	Coprococcus eutactus_A	SRS104400	SRP002163	United States	North America	ftp://ftp.ebi.ac.uk/pub/databases/metagenomics/mgnify_genomes/human-gut/v1.0/all_genomes/MGYG-HGUT-002/MGYG-HGUT-00231/genomes4/GUT_GENOME217894.gff.gz		2
GUT_GENOME219441	SRS146813_63	HGM	MAG	2637342	35	105224	44.31	98.66	0		0	0	5.03	16		GUT_GENOME001379	MGYG-HGUT-00231	Coprococcus eutactus_A	SRS146813	SRP002163	United States	North America	ftp://ftp.ebi.ac.uk/pub/databases/metagenomics/mgnify_genomes/human-gut/v1.0/all_genomes/MGYG-HGUT-002/MGYG-HGUT-00231/genomes3/GUT_GENOME219441.gff.gz		2
GUT_GENOME219605	SRS148159_4	HGM	MAG	2669171	68	202216	41.36	97.32	0		0	0	10.8	17		GUT_GENOME001027	MGYG-HGUT-00189	Coprococcus sp900066115	SRS148159	SRP002163	United States	North America	ftp://ftp.ebi.ac.uk/pub/databases/metagenomics/mgnify_genomes/human-gut/v1.0/all_genomes/MGYG-HGUT-001/MGYG-HGUT-00189/genomes1/GUT_GENOME219605.gff.gz		4
GUT_GENOME221291	SRS1596829_79	HGM	MAG	2588493	72	73585	41.54	95.97	0.67		0	0	0	18		GUT_GENOME001027	MGYG-HGUT-00189	Coprococcus sp900066115	SRS1596829	SRP080787	Mongolia	Asia	ftp://ftp.ebi.ac.uk/pub/databases/metagenomics/mgnify_genomes/human-gut/v1.0/all_genomes/MGYG-HGUT-001/MGYG-HGUT-00189/genomes2/GUT_GENOME221291.gff.gz		4
GUT_GENOME221986	SRS1596857_12	HGM	MAG	2651653	49	106519	44.16	98.66	0		0	0	6.87	18		GUT_GENOME001379	MGYG-HGUT-00231	Coprococcus eutactus_A	SRS1596857	SRP080787	China: Inner Mongolia	Asia	ftp://ftp.ebi.ac.uk/pub/databases/metagenomics/mgnify_genomes/human-gut/v1.0/all_genomes/MGYG-HGUT-002/MGYG-HGUT-00231/genomes2/GUT_GENOME221986.gff.gz		2
GUT_GENOME222205	SRS1596865_20	HGM	MAG	2632257	92	43864	44.63	97.99	0		0	0	9.3	15		GUT_GENOME001379	MGYG-HGUT-00231	Coprococcus eutactus_A	SRS1596865	SRP080787	China: Inner Mongolia	Asia	ftp://ftp.ebi.ac.uk/pub/databases/metagenomics/mgnify_genomes/human-gut/v1.0/all_genomes/MGYG-HGUT-002/MGYG-HGUT-00231/genomes3/GUT_GENOME222205.gff.gz		2
GUT_GENOME226755	SRS259519_23	HGM	MAG	2546888	119	42780	41.51	95.19	0.89		0	0	0	14		GUT_GENOME001027	MGYG-HGUT-00189	Coprococcus sp900066115	SRS259519	SRP008047	China	Asia	ftp://ftp.ebi.ac.uk/pub/databases/metagenomics/mgnify_genomes/human-gut/v1.0/all_genomes/MGYG-HGUT-001/MGYG-HGUT-00189/genomes2/GUT_GENOME226755.gff.gz		4
GUT_GENOME228455	SRS294868_27	HGM	MAG	2782543	34	122133	44.11	98.66	0		0	0	11.83	17		GUT_GENOME001379	MGYG-HGUT-00231	Coprococcus eutactus_A	SRS294868	SRP008047	China	Asia	ftp://ftp.ebi.ac.uk/pub/databases/metagenomics/mgnify_genomes/human-gut/v1.0/all_genomes/MGYG-HGUT-002/MGYG-HGUT-00231/genomes3/GUT_GENOME228455.gff.gz		2
GUT_GENOME228470	SRS294869_28	HGM	MAG	2749645	42	119372	44.22	98.66	0		0	25.38	11.38	19		GUT_GENOME001379	MGYG-HGUT-00231	Coprococcus eutactus_A	SRS294869	SRP008047	China	Asia	ftp://ftp.ebi.ac.uk/pub/databases/metagenomics/mgnify_genomes/human-gut/v1.0/all_genomes/MGYG-HGUT-002/MGYG-HGUT-00231/genomes2/GUT_GENOME228470.gff.gz		2
GUT_GENOME228489	SRS294870_1	HGM	MAG	2893128	30	121338	44.03	99.33	0		0	0	11.42	17		GUT_GENOME001379	MGYG-HGUT-00231	Coprococcus eutactus_A	SRS294870	SRP008047	China	Asia	ftp://ftp.ebi.ac.uk/pub/databases/metagenomics/mgnify_genomes/human-gut/v1.0/all_genomes/MGYG-HGUT-002/MGYG-HGUT-00231/genomes1/GUT_GENOME228489.gff.gz		2
GUT_GENOME228870	SRS294892_5	HGM	MAG	2601361	78	51049	44.38	96.64	0		0	0	0	16		GUT_GENOME001379	MGYG-HGUT-00231	Coprococcus eutactus_A	SRS294892	SRP008047	China	Asia	ftp://ftp.ebi.ac.uk/pub/databases/metagenomics/mgnify_genomes/human-gut/v1.0/all_genomes/MGYG-HGUT-002/MGYG-HGUT-00231/genomes3/GUT_GENOME228870.gff.gz		2
GUT_GENOME229271	SRS294920_23	HGM	MAG	2737609	52	131235	44.18	98.66	0		0	0	5.09	18		GUT_GENOME001379	MGYG-HGUT-00231	Coprococcus eutactus_A	SRS294920	SRP008047	China	Asia	ftp://ftp.ebi.ac.uk/pub/databases/metagenomics/mgnify_genomes/human-gut/v1.0/all_genomes/MGYG-HGUT-002/MGYG-HGUT-00231/genomes1/GUT_GENOME229271.gff.gz		2
GUT_GENOME229366	SRS294927_50	HGM	MAG	2641180	40	101984	43.36	99.33	0		0	0	0	17		GUT_GENOME000055	MGYG-HGUT-00018	Coprococcus eutactus	SRS294927	SRP008047	China	Asia	ftp://ftp.ebi.ac.uk/pub/databases/metagenomics/mgnify_genomes/human-gut/v1.0/all_genomes/MGYG-HGUT-000/MGYG-HGUT-00018/genomes1/GUT_GENOME229366.gff.gz		1
GUT_GENOME229455	SRS294932_65	HGM	MAG	2603374	61	105131	41.4	96.64	0		0	0	0	19		GUT_GENOME001027	MGYG-HGUT-00189	Coprococcus sp900066115	SRS294932	SRP008047	China	Asia	ftp://ftp.ebi.ac.uk/pub/databases/metagenomics/mgnify_genomes/human-gut/v1.0/all_genomes/MGYG-HGUT-001/MGYG-HGUT-00189/genomes1/GUT_GENOME229455.gff.gz		4
GUT_GENOME229489	SRS294934_15	HGM	MAG	2484747	38	106399	44.35	97.32	0.02		0	0	0	17		GUT_GENOME001379	MGYG-HGUT-00231	Coprococcus eutactus_A	SRS294934	SRP008047	China	Asia	ftp://ftp.ebi.ac.uk/pub/databases/metagenomics/mgnify_genomes/human-gut/v1.0/all_genomes/MGYG-HGUT-002/MGYG-HGUT-00231/genomes1/GUT_GENOME229489.gff.gz		2
GUT_GENOME229848	SRS294955_13	HGM	MAG	2683646	29	158547	44.2	99.33	0		0	0	5.09	18		GUT_GENOME001379	MGYG-HGUT-00231	Coprococcus eutactus_A	SRS294955	SRP008047	China	Asia	ftp://ftp.ebi.ac.uk/pub/databases/metagenomics/mgnify_genomes/human-gut/v1.0/all_genomes/MGYG-HGUT-002/MGYG-HGUT-00231/genomes2/GUT_GENOME229848.gff.gz		2
GUT_GENOME230106	SRS294970_32	HGM	MAG	2738149	80	104968	40.88	96.64	0.27		0	0	0	18		GUT_GENOME001027	MGYG-HGUT-00189	Coprococcus sp900066115	SRS294970	SRP008047	China	Asia	ftp://ftp.ebi.ac.uk/pub/databases/metagenomics/mgnify_genomes/human-gut/v1.0/all_genomes/MGYG-HGUT-001/MGYG-HGUT-00189/genomes1/GUT_GENOME230106.gff.gz		4
GUT_GENOME230554	SRS294995_72	HGM	MAG	2519969	42	101400	41.43	97.07	0		0	0	0	16		GUT_GENOME001027	MGYG-HGUT-00189	Coprococcus sp900066115	SRS294995	SRP008047	China	Asia	ftp://ftp.ebi.ac.uk/pub/databases/metagenomics/mgnify_genomes/human-gut/v1.0/all_genomes/MGYG-HGUT-001/MGYG-HGUT-00189/genomes2/GUT_GENOME230554.gff.gz		4
GUT_GENOME231053	SRS295020_48	HGM	MAG	2867390	35	123019	44.24	99.33	0		0	0	11.76	19		GUT_GENOME001379	MGYG-HGUT-00231	Coprococcus eutactus_A	SRS295020	SRP008047	China	Asia	ftp://ftp.ebi.ac.uk/pub/databases/metagenomics/mgnify_genomes/human-gut/v1.0/all_genomes/MGYG-HGUT-002/MGYG-HGUT-00231/genomes2/GUT_GENOME231053.gff.gz		2
GUT_GENOME232489	SRS475540_112	HGM	MAG	2612133	65	60564	44.3	96.98	0.34		0	26.42	10.77	15		GUT_GENOME001379	MGYG-HGUT-00231	Coprococcus eutactus_A	SRS475540	SRP029441	Fiji	Oceania	ftp://ftp.ebi.ac.uk/pub/databases/metagenomics/mgnify_genomes/human-gut/v1.0/all_genomes/MGYG-HGUT-002/MGYG-HGUT-00231/genomes2/GUT_GENOME232489.gff.gz		2
GUT_GENOME233350	SRS475658_26	HGM	MAG	2894438	45	186940	44.03	99.33	0		0	0	0	19		GUT_GENOME001379	MGYG-HGUT-00231	Coprococcus eutactus_A	SRS475658	SRP029441	Fiji	Oceania	ftp://ftp.ebi.ac.uk/pub/databases/metagenomics/mgnify_genomes/human-gut/v1.0/all_genomes/MGYG-HGUT-002/MGYG-HGUT-00231/genomes3/GUT_GENOME233350.gff.gz		2
GUT_GENOME233998	SRS475929_12	HGM	MAG	2958936	28	185437	43.95	99.33	0		0	7.57	11.15	18		GUT_GENOME001379	MGYG-HGUT-00231	Coprococcus eutactus_A	SRS475929	SRP029441	Fiji	Oceania	ftp://ftp.ebi.ac.uk/pub/databases/metagenomics/mgnify_genomes/human-gut/v1.0/all_genomes/MGYG-HGUT-002/MGYG-HGUT-00231/genomes2/GUT_GENOME233998.gff.gz		2
GUT_GENOME235318	SRS476074_49	HGM	MAG	2793297	38	155154	44.31	99.33	0.24		0	0	0	17		GUT_GENOME001379	MGYG-HGUT-00231	Coprococcus eutactus_A	SRS476074	SRP029441	Fiji	Oceania	ftp://ftp.ebi.ac.uk/pub/databases/metagenomics/mgnify_genomes/human-gut/v1.0/all_genomes/MGYG-HGUT-002/MGYG-HGUT-00231/genomes3/GUT_GENOME235318.gff.gz		2
GUT_GENOME236383	SRS476163_101	HGM	MAG	2665554	67	71958	44.11	98.66	0.34		0	0	6.09	16		GUT_GENOME001379	MGYG-HGUT-00231	Coprococcus eutactus_A	SRS476163	SRP029441	Fiji	Oceania	ftp://ftp.ebi.ac.uk/pub/databases/metagenomics/mgnify_genomes/human-gut/v1.0/all_genomes/MGYG-HGUT-002/MGYG-HGUT-00231/genomes1/GUT_GENOME236383.gff.gz		2
GUT_GENOME236933	SRS476196_33	HGM	MAG	2891676	32	212000	44.14	99.33	0		0	23.61	11.52	16		GUT_GENOME001379	MGYG-HGUT-00231	Coprococcus eutactus_A	SRS476196	SRP029441	Fiji	Oceania	ftp://ftp.ebi.ac.uk/pub/databases/metagenomics/mgnify_genomes/human-gut/v1.0/all_genomes/MGYG-HGUT-002/MGYG-HGUT-00231/genomes3/GUT_GENOME236933.gff.gz		2
GUT_GENOME237017	SRS476209_43	HGM	MAG	2916798	36	192797	44.15	99.33	0.18		0	23.61	7.66	18		GUT_GENOME001379	MGYG-HGUT-00231	Coprococcus eutactus_A	SRS476209	SRP029441	Fiji	Oceania	ftp://ftp.ebi.ac.uk/pub/databases/metagenomics/mgnify_genomes/human-gut/v1.0/all_genomes/MGYG-HGUT-002/MGYG-HGUT-00231/genomes3/GUT_GENOME237017.gff.gz		2
GUT_GENOME237738	SRS476328_16	HGM	MAG	2713103	69	72145	42.78	95.3	0		0	0	0	15		GUT_GENOME105828	MGYG-HGUT-01745	Coprococcus sp.	SRS476328	SRP029441	Fiji	Oceania	ftp://ftp.ebi.ac.uk/pub/databases/metagenomics/mgnify_genomes/human-gut/v1.0/all_genomes/MGYG-HGUT-017/MGYG-HGUT-01745/genomes1/GUT_GENOME237738.gff.gz		7
GUT_GENOME237808	SRS476342_44	HGM	MAG	2800583	20	204220	44.12	99.33	0.5		0	0	7.93	15		GUT_GENOME001379	MGYG-HGUT-00231	Coprococcus eutactus_A	SRS476342	SRP029441	Fiji	Oceania	ftp://ftp.ebi.ac.uk/pub/databases/metagenomics/mgnify_genomes/human-gut/v1.0/all_genomes/MGYG-HGUT-002/MGYG-HGUT-00231/genomes3/GUT_GENOME237808.gff.gz		2
GUT_GENOME237856	SRS476347_28	HGM	MAG	2803550	44	114019	44.25	99.16	0		0	23.61	6.63	16		GUT_GENOME001379	MGYG-HGUT-00231	Coprococcus eutactus_A	SRS476347	SRP029441	Fiji	Oceania	ftp://ftp.ebi.ac.uk/pub/databases/metagenomics/mgnify_genomes/human-gut/v1.0/all_genomes/MGYG-HGUT-002/MGYG-HGUT-00231/genomes2/GUT_GENOME237856.gff.gz		2
GUT_GENOME238029	SRS476516_52	HGM	MAG	2810382	42	150330	44.33	99.33	0.92		0	46.05	11.52	18		GUT_GENOME001379	MGYG-HGUT-00231	Coprococcus eutactus_A	SRS476516	SRP029441	Fiji	Oceania	ftp://ftp.ebi.ac.uk/pub/databases/metagenomics/mgnify_genomes/human-gut/v1.0/all_genomes/MGYG-HGUT-002/MGYG-HGUT-00231/genomes3/GUT_GENOME238029.gff.gz		2
GUT_GENOME238486	SRS820585_70	HGM	MAG	2649442	36	98840	44.28	95.3	0		0	8.61	0	17		GUT_GENOME001379	MGYG-HGUT-00231	Coprococcus eutactus_A	SRS820585	SRP052307	United States	North America	ftp://ftp.ebi.ac.uk/pub/databases/metagenomics/mgnify_genomes/human-gut/v1.0/all_genomes/MGYG-HGUT-002/MGYG-HGUT-00231/genomes2/GUT_GENOME238486.gff.gz		2
GUT_GENOME238516	SRS820587_9	HGM	MAG	2622698	28	211302	44	96.98	0.34		0	0	10.8	17		GUT_GENOME001379	MGYG-HGUT-00231	Coprococcus eutactus_A	SRS820587	SRP052307	United States	North America	ftp://ftp.ebi.ac.uk/pub/databases/metagenomics/mgnify_genomes/human-gut/v1.0/all_genomes/MGYG-HGUT-002/MGYG-HGUT-00231/genomes4/GUT_GENOME238516.gff.gz		2
GUT_GENOME239588	SRS883042_2	HGM	MAG	2758813	55	69259	44.03	97.27	0		0	0	0	18		GUT_GENOME001379	MGYG-HGUT-00231	Coprococcus eutactus_A	SRS883042	SRP056480	Italy	Europe	ftp://ftp.ebi.ac.uk/pub/databases/metagenomics/mgnify_genomes/human-gut/v1.0/all_genomes/MGYG-HGUT-002/MGYG-HGUT-00231/genomes4/GUT_GENOME239588.gff.gz		2
GUT_GENOME239734	TF11-13	CGR	Isolate	3134234	39	285278	43.81	99.33	0.34		0	64.38	99.79	20	GCA_003481085	GUT_GENOME001379	MGYG-HGUT-00231	Coprococcus eutactus_A	SAMN09736945	PRJNA482748	China	Asia	ftp://ftp.ebi.ac.uk/pub/databases/metagenomics/mgnify_genomes/human-gut/v1.0/all_genomes/MGYG-HGUT-002/MGYG-HGUT-00231/genomes3/GUT_GENOME239734.gff.gz		2
GUT_GENOME239788	TM07-19	CGR	Isolate	3345861	81	148927	41.89	99.42	0		0	99.67	99.62	20	GCA_003436145	GUT_GENOME095993	MGYG-HGUT-01315	Coprococcus comes	SAMN09737001	PRJNA482748	China	Asia	ftp://ftp.ebi.ac.uk/pub/databases/metagenomics/mgnify_genomes/human-gut/v1.0/all_genomes/MGYG-HGUT-013/MGYG-HGUT-01315/genomes1/GUT_GENOME239788.gff.gz		3
GUT_GENOME242936	VincentC_2016__MM001.4__bin.13	CIBIO	MAG	2586616	195	17863	43.41	95.11	0		0	0	12.03	15		GUT_GENOME000055	MGYG-HGUT-00018	Coprococcus eutactus	SRS1098176	SRP064400	Canada	North America	ftp://ftp.ebi.ac.uk/pub/databases/metagenomics/mgnify_genomes/human-gut/v1.0/all_genomes/MGYG-HGUT-000/MGYG-HGUT-00018/genomes1/GUT_GENOME242936.gff.gz		1
GUT_GENOME243213	VincentC_2016__MM019.3__bin.6	CIBIO	MAG	2763686	89	46575	44.41	99.33	0.22		0	0	0	18		GUT_GENOME001379	MGYG-HGUT-00231	Coprococcus eutactus_A	SRS1101439	SRP064400	Canada	North America	ftp://ftp.ebi.ac.uk/pub/databases/metagenomics/mgnify_genomes/human-gut/v1.0/all_genomes/MGYG-HGUT-002/MGYG-HGUT-00231/genomes3/GUT_GENOME243213.gff.gz		2
GUT_GENOME243492	VincentC_2016__MM033.3__bin.24	CIBIO	MAG	2899807	72	68761	44.1	97.99	0		0	99.74	12.24	17		GUT_GENOME001379	MGYG-HGUT-00231	Coprococcus eutactus_A	SRS1101489	SRP064400	Canada	North America	ftp://ftp.ebi.ac.uk/pub/databases/metagenomics/mgnify_genomes/human-gut/v1.0/all_genomes/MGYG-HGUT-002/MGYG-HGUT-00231/genomes2/GUT_GENOME243492.gff.gz		2
GUT_GENOME244515	VogtmannE_2016__MMRS12272136ST-27-0-0__bin.61	CIBIO	MAG	2822908	24	269325	44.13	98.66	0		0	0	0	14		GUT_GENOME001379	MGYG-HGUT-00231	Coprococcus eutactus_A	ERS1066728	ERP013933	United States	North America	ftp://ftp.ebi.ac.uk/pub/databases/metagenomics/mgnify_genomes/human-gut/v1.0/all_genomes/MGYG-HGUT-002/MGYG-HGUT-00231/genomes3/GUT_GENOME244515.gff.gz		2
GUT_GENOME244906	VogtmannE_2016__MMRS29805707ST-27-0-0__bin.3	CIBIO	MAG	2829362	35	140954	44.14	99.33	0		0	0	0	15		GUT_GENOME001379	MGYG-HGUT-00231	Coprococcus eutactus_A	ERS1066687	ERP013933	United States	North America	ftp://ftp.ebi.ac.uk/pub/databases/metagenomics/mgnify_genomes/human-gut/v1.0/all_genomes/MGYG-HGUT-002/MGYG-HGUT-00231/genomes4/GUT_GENOME244906.gff.gz		2
GUT_GENOME244955	VogtmannE_2016__MMRS32573774ST-27-0-0__bin.3	CIBIO	MAG	2780357	53	80264	43.15	95.97	0		0	9.26	0	16		GUT_GENOME000055	MGYG-HGUT-00018	Coprococcus eutactus	ERS1066677	ERP013933	United States	North America	ftp://ftp.ebi.ac.uk/pub/databases/metagenomics/mgnify_genomes/human-gut/v1.0/all_genomes/MGYG-HGUT-000/MGYG-HGUT-00018/genomes1/GUT_GENOME244955.gff.gz		1
GUT_GENOME245153	VogtmannE_2016__MMRS38861560ST-27-0-0__bin.45	CIBIO	MAG	3010763	30	189527	43.82	99.33	0		0	0	0	18		GUT_GENOME001379	MGYG-HGUT-00231	Coprococcus eutactus_A	ERS1066721	ERP013933	United States	North America	ftp://ftp.ebi.ac.uk/pub/databases/metagenomics/mgnify_genomes/human-gut/v1.0/all_genomes/MGYG-HGUT-002/MGYG-HGUT-00231/genomes3/GUT_GENOME245153.gff.gz		2
GUT_GENOME245251	VogtmannE_2016__MMRS39582183ST-27-0-0__bin.25	CIBIO	MAG	2941217	65	61763	44.05	97.84	0		0	19.5	0	16		GUT_GENOME001379	MGYG-HGUT-00231	Coprococcus eutactus_A	ERS1066675	ERP013933	United States	North America	ftp://ftp.ebi.ac.uk/pub/databases/metagenomics/mgnify_genomes/human-gut/v1.0/all_genomes/MGYG-HGUT-002/MGYG-HGUT-00231/genomes2/GUT_GENOME245251.gff.gz		2
GUT_GENOME245736	VogtmannE_2016__MMRS51737257ST-27-0-0__bin.35	CIBIO	MAG	2855757	18	334969	42.88	98.66	0		0	70.52	0	16		GUT_GENOME000055	MGYG-HGUT-00018	Coprococcus eutactus	ERS1066662	ERP013933	United States	North America	ftp://ftp.ebi.ac.uk/pub/databases/metagenomics/mgnify_genomes/human-gut/v1.0/all_genomes/MGYG-HGUT-000/MGYG-HGUT-00018/genomes1/GUT_GENOME245736.gff.gz		1
GUT_GENOME245890	VogtmannE_2016__MMRS57276462ST-27-0-0__bin.20	CIBIO	MAG	2624728	43	94030	41.15	97.99	0.13		0	0	0	14		GUT_GENOME001027	MGYG-HGUT-00189	Coprococcus sp000154245	ERS1066658	ERP013933	United States	North America	ftp://ftp.ebi.ac.uk/pub/databases/metagenomics/mgnify_genomes/human-gut/v1.0/all_genomes/MGYG-HGUT-001/MGYG-HGUT-00189/genomes1/GUT_GENOME245890.gff.gz		5
GUT_GENOME246149	VogtmannE_2016__MMRS65205033ST-27-0-0__bin.30	CIBIO	MAG	2981008	43	105978	44.09	99.33	0		0	0	0	16		GUT_GENOME001379	MGYG-HGUT-00231	Coprococcus eutactus_A	ERS1066642	ERP013933	United States	North America	ftp://ftp.ebi.ac.uk/pub/databases/metagenomics/mgnify_genomes/human-gut/v1.0/all_genomes/MGYG-HGUT-002/MGYG-HGUT-00231/genomes1/GUT_GENOME246149.gff.gz		2
GUT_GENOME246199	VogtmannE_2016__MMRS65862658ST-27-0-0__bin.11	CIBIO	MAG	3068633	28	175771	43.86	99.33	0		0	0	0	18		GUT_GENOME001379	MGYG-HGUT-00231	Coprococcus eutactus_A	ERS1066737	ERP013933	United States	North America	ftp://ftp.ebi.ac.uk/pub/databases/metagenomics/mgnify_genomes/human-gut/v1.0/all_genomes/MGYG-HGUT-002/MGYG-HGUT-00231/genomes2/GUT_GENOME246199.gff.gz		2
GUT_GENOME246370	VogtmannE_2016__MMRS67690541ST-27-0-0__bin.42	CIBIO	MAG	2813483	47	93820	44.15	99.33	0.22		0	0	0	17		GUT_GENOME001379	MGYG-HGUT-00231	Coprococcus eutactus_A	ERS1066670	ERP013933	United States	North America	ftp://ftp.ebi.ac.uk/pub/databases/metagenomics/mgnify_genomes/human-gut/v1.0/all_genomes/MGYG-HGUT-002/MGYG-HGUT-00231/genomes3/GUT_GENOME246370.gff.gz		2
GUT_GENOME247115	VogtmannE_2016__MMRS86178473ST-27-0-0__bin.26	CIBIO	MAG	2886787	24	264833	42.99	99.33	0		0	0	0	15		GUT_GENOME000055	MGYG-HGUT-00018	Coprococcus eutactus	ERS1066640	ERP013933	United States	North America	ftp://ftp.ebi.ac.uk/pub/databases/metagenomics/mgnify_genomes/human-gut/v1.0/all_genomes/MGYG-HGUT-000/MGYG-HGUT-00018/genomes1/GUT_GENOME247115.gff.gz		1
GUT_GENOME247281	VogtmannE_2016__MMRS90191266ST-27-0-0__bin.76	CIBIO	MAG	2899921	21	172271	43.93	99.33	0.34		0	0	0	18		GUT_GENOME001379	MGYG-HGUT-00231	Coprococcus eutactus_A	ERS1066703	ERP013933	United States	North America	ftp://ftp.ebi.ac.uk/pub/databases/metagenomics/mgnify_genomes/human-gut/v1.0/all_genomes/MGYG-HGUT-002/MGYG-HGUT-00231/genomes3/GUT_GENOME247281.gff.gz		2
GUT_GENOME247423	VogtmannE_2016__MMRS93621581ST-27-0-0__bin.41	CIBIO	MAG	2997067	18	214161	43.84	99.33	0.34		0	0	0	15		GUT_GENOME001379	MGYG-HGUT-00231	Coprococcus eutactus_A	ERS1066711	ERP013933	United States	North America	ftp://ftp.ebi.ac.uk/pub/databases/metagenomics/mgnify_genomes/human-gut/v1.0/all_genomes/MGYG-HGUT-002/MGYG-HGUT-00231/genomes3/GUT_GENOME247423.gff.gz		2
GUT_GENOME247510	VogtmannE_2016__MMRS95277876ST-27-0-0__bin.43	CIBIO	MAG	2849984	30	147616	44.11	98.66	0		0	0	5.44	16		GUT_GENOME001379	MGYG-HGUT-00231	Coprococcus eutactus_A	ERS1066734	ERP013933	United States	North America	ftp://ftp.ebi.ac.uk/pub/databases/metagenomics/mgnify_genomes/human-gut/v1.0/all_genomes/MGYG-HGUT-002/MGYG-HGUT-00231/genomes2/GUT_GENOME247510.gff.gz		2
GUT_GENOME247944	WenC_2017__N025__bin.51	CIBIO	MAG	2547869	21	225506	41.11	99.33	0		0	0	5.78	18		GUT_GENOME001027	MGYG-HGUT-00189	Coprococcus sp000154245	SRS1846831	SRP094805	China	Asia	ftp://ftp.ebi.ac.uk/pub/databases/metagenomics/mgnify_genomes/human-gut/v1.0/all_genomes/MGYG-HGUT-001/MGYG-HGUT-00189/genomes1/GUT_GENOME247944.gff.gz		5
GUT_GENOME248340	WenC_2017__N233__bin.20	CIBIO	MAG	2613955	33	178909	44.4	99.33	0		0	0	0	19		GUT_GENOME001379	MGYG-HGUT-00231	Coprococcus eutactus_A	SRS1846764	SRP094805	China	Asia	ftp://ftp.ebi.ac.uk/pub/databases/metagenomics/mgnify_genomes/human-gut/v1.0/all_genomes/MGYG-HGUT-002/MGYG-HGUT-00231/genomes1/GUT_GENOME248340.gff.gz		2
GUT_GENOME248431	WenC_2017__N240__bin.13	CIBIO	MAG	2275852	57	59452	42.11	97.62	0.67		0	0	0	15		GUT_GENOME140272	MGYG-HGUT-02289	Coprococcus sp000433075	SRS1846788	SRP094805	China	Asia	ftp://ftp.ebi.ac.uk/pub/databases/metagenomics/mgnify_genomes/human-gut/v1.0/all_genomes/MGYG-HGUT-022/MGYG-HGUT-02289/genomes1/GUT_GENOME248431.gff.gz		8
GUT_GENOME248523	WenC_2017__N244__bin.80	CIBIO	MAG	2344667	56	96689	41.38	95.72	0.67		0	0	0	13		GUT_GENOME001027	MGYG-HGUT-00189	Coprococcus sp900066115	SRS1846768	SRP094805	China	Asia	ftp://ftp.ebi.ac.uk/pub/databases/metagenomics/mgnify_genomes/human-gut/v1.0/all_genomes/MGYG-HGUT-001/MGYG-HGUT-00189/genomes2/GUT_GENOME248523.gff.gz		4
GUT_GENOME248991	WenC_2017__N306__bin.8	CIBIO	MAG	2587065	32	146949	44.11	99.33	0		0	0	5.44	16		GUT_GENOME001379	MGYG-HGUT-00231	Coprococcus eutactus_A	SRS1846892	SRP094805	China	Asia	ftp://ftp.ebi.ac.uk/pub/databases/metagenomics/mgnify_genomes/human-gut/v1.0/all_genomes/MGYG-HGUT-002/MGYG-HGUT-00231/genomes3/GUT_GENOME248991.gff.gz		2
GUT_GENOME249896	WenC_2017__RA049__bin.15	CIBIO	MAG	2609999	107	57462	41.32	97.74	0		0	0	56.65	16		GUT_GENOME001027	MGYG-HGUT-00189	Coprococcus sp900066115	SRS1846857	SRP094805	China	Asia	ftp://ftp.ebi.ac.uk/pub/databases/metagenomics/mgnify_genomes/human-gut/v1.0/all_genomes/MGYG-HGUT-001/MGYG-HGUT-00189/genomes2/GUT_GENOME249896.gff.gz		4
GUT_GENOME250382	WenC_2017__RA089__bin.33	CIBIO	MAG	2794713	66	85109	44.21	98.66	0		0	0	0	16		GUT_GENOME001379	MGYG-HGUT-00231	Coprococcus eutactus_A	SRS1846858	SRP094805	China	Asia	ftp://ftp.ebi.ac.uk/pub/databases/metagenomics/mgnify_genomes/human-gut/v1.0/all_genomes/MGYG-HGUT-002/MGYG-HGUT-00231/genomes2/GUT_GENOME250382.gff.gz		2
GUT_GENOME251019	XieH_2016__YSZC12003_35388__bin.21	CIBIO	MAG	2522880	48	93041	41.17	97.48	0.67		0	19.5	0	15		GUT_GENOME001027	MGYG-HGUT-00189	Coprococcus sp000154245	ERS746712	ERP010700	United Kingdom	Europe	ftp://ftp.ebi.ac.uk/pub/databases/metagenomics/mgnify_genomes/human-gut/v1.0/all_genomes/MGYG-HGUT-001/MGYG-HGUT-00189/genomes2/GUT_GENOME251019.gff.gz		5
GUT_GENOME251025	XieH_2016__YSZC12003_35388__bin.2	CIBIO	MAG	2900498	40	118571	43.99	98.51	0		0	0	9.3	14		GUT_GENOME001379	MGYG-HGUT-00231	Coprococcus eutactus_A	ERS746712	ERP010700	United Kingdom	Europe	ftp://ftp.ebi.ac.uk/pub/databases/metagenomics/mgnify_genomes/human-gut/v1.0/all_genomes/MGYG-HGUT-002/MGYG-HGUT-00231/genomes1/GUT_GENOME251025.gff.gz		2
GUT_GENOME251124	XieH_2016__YSZC12003_35391__bin.48	CIBIO	MAG	2816569	28	152974	44.19	96.98	0		0	40.12	11.21	17		GUT_GENOME001379	MGYG-HGUT-00231	Coprococcus eutactus_A	ERS746831	ERP010700	United Kingdom	Europe	ftp://ftp.ebi.ac.uk/pub/databases/metagenomics/mgnify_genomes/human-gut/v1.0/all_genomes/MGYG-HGUT-002/MGYG-HGUT-00231/genomes3/GUT_GENOME251124.gff.gz		2
GUT_GENOME251181	XieH_2016__YSZC12003_35392__bin.89	CIBIO	MAG	2592760	30	201904	41.26	97.32	0		0	61.71	14.53	18		GUT_GENOME001027	MGYG-HGUT-00189	Coprococcus sp900066115	ERS746713	ERP010700	United Kingdom	Europe	ftp://ftp.ebi.ac.uk/pub/databases/metagenomics/mgnify_genomes/human-gut/v1.0/all_genomes/MGYG-HGUT-001/MGYG-HGUT-00189/genomes1/GUT_GENOME251181.gff.gz		4
GUT_GENOME251225	XieH_2016__YSZC12003_35505__bin.68	CIBIO	MAG	2804534	93	63408	44.12	97.86	0		0	0	0	16		GUT_GENOME001379	MGYG-HGUT-00231	Coprococcus eutactus_A	ERS746881	ERP010700	United Kingdom	Europe	ftp://ftp.ebi.ac.uk/pub/databases/metagenomics/mgnify_genomes/human-gut/v1.0/all_genomes/MGYG-HGUT-002/MGYG-HGUT-00231/genomes2/GUT_GENOME251225.gff.gz		2
GUT_GENOME251252	XieH_2016__YSZC12003_35506__bin.38	CIBIO	MAG	2597096	31	193743	41.25	98.66	0		0	0	11.21	17		GUT_GENOME001027	MGYG-HGUT-00189	Coprococcus sp900066115	ERS746882	ERP010700	United Kingdom	Europe	ftp://ftp.ebi.ac.uk/pub/databases/metagenomics/mgnify_genomes/human-gut/v1.0/all_genomes/MGYG-HGUT-001/MGYG-HGUT-00189/genomes1/GUT_GENOME251252.gff.gz		4
GUT_GENOME251430	XieH_2016__YSZC12003_35516__bin.54	CIBIO	MAG	2775835	26	216807	44.35	98.66	0		0	46.9	0	18		GUT_GENOME001379	MGYG-HGUT-00231	Coprococcus eutactus_A	ERS746716	ERP010700	United Kingdom	Europe	ftp://ftp.ebi.ac.uk/pub/databases/metagenomics/mgnify_genomes/human-gut/v1.0/all_genomes/MGYG-HGUT-002/MGYG-HGUT-00231/genomes3/GUT_GENOME251430.gff.gz		2
GUT_GENOME251674	XieH_2016__YSZC12003_35541__bin.72	CIBIO	MAG	2644426	30	227133	41.43	99.33	0.17		0	0	14.53	16		GUT_GENOME001027	MGYG-HGUT-00189	Coprococcus sp900066115	ERS746834	ERP010700	United Kingdom	Europe	ftp://ftp.ebi.ac.uk/pub/databases/metagenomics/mgnify_genomes/human-gut/v1.0/all_genomes/MGYG-HGUT-001/MGYG-HGUT-00189/genomes2/GUT_GENOME251674.gff.gz		4
GUT_GENOME251904	XieH_2016__YSZC12003_35561__bin.18	CIBIO	MAG	2734735	19	291765	41.15	99.33	0		0	47.03	0	19		GUT_GENOME001027	MGYG-HGUT-00189	Coprococcus sp900066115	ERS746836	ERP010700	United Kingdom	Europe	ftp://ftp.ebi.ac.uk/pub/databases/metagenomics/mgnify_genomes/human-gut/v1.0/all_genomes/MGYG-HGUT-001/MGYG-HGUT-00189/genomes1/GUT_GENOME251904.gff.gz		4
GUT_GENOME252179	XieH_2016__YSZC12003_35583__bin.54	CIBIO	MAG	2613283	26	155910	41.33	99.33	0		0	0	18.46	17		GUT_GENOME001027	MGYG-HGUT-00189	Coprococcus sp900066115	ERS746726	ERP010700	United Kingdom	Europe	ftp://ftp.ebi.ac.uk/pub/databases/metagenomics/mgnify_genomes/human-gut/v1.0/all_genomes/MGYG-HGUT-001/MGYG-HGUT-00189/genomes2/GUT_GENOME252179.gff.gz		4
GUT_GENOME252203	XieH_2016__YSZC12003_35629__bin.26	CIBIO	MAG	2666985	47	93125	40.87	96.64	0.02		0	0	0	14		GUT_GENOME001027	MGYG-HGUT-00189	Coprococcus sp900066115	ERS746885	ERP010700	United Kingdom	Europe	ftp://ftp.ebi.ac.uk/pub/databases/metagenomics/mgnify_genomes/human-gut/v1.0/all_genomes/MGYG-HGUT-001/MGYG-HGUT-00189/genomes1/GUT_GENOME252203.gff.gz		4
GUT_GENOME252338	XieH_2016__YSZC12003_35636__bin.92	CIBIO	MAG	2910380	24	173105	44.08	97.99	0		0	0	0	18		GUT_GENOME001379	MGYG-HGUT-00231	Coprococcus eutactus_A	ERS746886	ERP010700	United Kingdom	Europe	ftp://ftp.ebi.ac.uk/pub/databases/metagenomics/mgnify_genomes/human-gut/v1.0/all_genomes/MGYG-HGUT-002/MGYG-HGUT-00231/genomes1/GUT_GENOME252338.gff.gz		2
GUT_GENOME252430	XieH_2016__YSZC12003_35657__bin.68	CIBIO	MAG	2449351	39	95210	41.25	98.05	0		0	0	14.53	16		GUT_GENOME103847	MGYG-HGUT-01707	Coprococcus sp000154245	ERS746729	ERP010700	United Kingdom	Europe	ftp://ftp.ebi.ac.uk/pub/databases/metagenomics/mgnify_genomes/human-gut/v1.0/all_genomes/MGYG-HGUT-017/MGYG-HGUT-01707/genomes1/GUT_GENOME252430.gff.gz		5
GUT_GENOME252441	XieH_2016__YSZC12003_35658__bin.22	CIBIO	MAG	2855152	20	255289	44.03	99.33	0		0	0	10.91	18		GUT_GENOME001379	MGYG-HGUT-00231	Coprococcus eutactus_A	ERS746730	ERP010700	United Kingdom	Europe	ftp://ftp.ebi.ac.uk/pub/databases/metagenomics/mgnify_genomes/human-gut/v1.0/all_genomes/MGYG-HGUT-002/MGYG-HGUT-00231/genomes2/GUT_GENOME252441.gff.gz		2
GUT_GENOME252484	XieH_2016__YSZC12003_35665__bin.1	CIBIO	MAG	2384262	35	113915	41.27	97.32	0.02		0	0	10.74	14		GUT_GENOME103847	MGYG-HGUT-01707	Coprococcus sp000154245	ERS746731	ERP010700	United Kingdom	Europe	ftp://ftp.ebi.ac.uk/pub/databases/metagenomics/mgnify_genomes/human-gut/v1.0/all_genomes/MGYG-HGUT-017/MGYG-HGUT-01707/genomes1/GUT_GENOME252484.gff.gz		5
GUT_GENOME252536	XieH_2016__YSZC12003_35666__bin.40	CIBIO	MAG	2938861	26	270957	42.95	99.33	0		0	24.27	0	17		GUT_GENOME000055	MGYG-HGUT-00018	Coprococcus eutactus	ERS746732	ERP010700	United Kingdom	Europe	ftp://ftp.ebi.ac.uk/pub/databases/metagenomics/mgnify_genomes/human-gut/v1.0/all_genomes/MGYG-HGUT-000/MGYG-HGUT-00018/genomes1/GUT_GENOME252536.gff.gz		1
GUT_GENOME252725	XieH_2016__YSZC12003_35706__bin.10	CIBIO	MAG	2713976	21	250536	41.29	99.33	0		0	70.58	82.91	18		GUT_GENOME001027	MGYG-HGUT-00189	Coprococcus sp900066115	ERS746735	ERP010700	United Kingdom	Europe	ftp://ftp.ebi.ac.uk/pub/databases/metagenomics/mgnify_genomes/human-gut/v1.0/all_genomes/MGYG-HGUT-001/MGYG-HGUT-00189/genomes2/GUT_GENOME252725.gff.gz		4
GUT_GENOME252821	XieH_2016__YSZC12003_35708__bin.43	CIBIO	MAG	2485604	57	68087	41.09	96.94	0		0	0	0	13		GUT_GENOME103847	MGYG-HGUT-01707	Coprococcus sp000154245	ERS746840	ERP010700	United Kingdom	Europe	ftp://ftp.ebi.ac.uk/pub/databases/metagenomics/mgnify_genomes/human-gut/v1.0/all_genomes/MGYG-HGUT-017/MGYG-HGUT-01707/genomes1/GUT_GENOME252821.gff.gz		5
GUT_GENOME252853	XieH_2016__YSZC12003_35712__bin.43	CIBIO	MAG	2646003	67	64368	44.04	98.72	0.67		0	0	11.25	16		GUT_GENOME103893	MGYG-HGUT-01714	Coprococcus_A catus	ERS746736	ERP010700	United Kingdom	Europe	ftp://ftp.ebi.ac.uk/pub/databases/metagenomics/mgnify_genomes/human-gut/v1.0/all_genomes/MGYG-HGUT-017/MGYG-HGUT-01714/genomes1/GUT_GENOME252853.gff.gz		9
GUT_GENOME252881	XieH_2016__YSZC12003_35723__bin.22	CIBIO	MAG	2966943	24	272901	43	99.33	0		0	0	0	18		GUT_GENOME000055	MGYG-HGUT-00018	Coprococcus eutactus	ERS746737	ERP010700	United Kingdom	Europe	ftp://ftp.ebi.ac.uk/pub/databases/metagenomics/mgnify_genomes/human-gut/v1.0/all_genomes/MGYG-HGUT-000/MGYG-HGUT-00018/genomes1/GUT_GENOME252881.gff.gz		1
GUT_GENOME253004	XieH_2016__YSZC12003_35734__bin.43	CIBIO	MAG	2642365	20	218556	41.3	99.33	0		0	0	5.78	19		GUT_GENOME001027	MGYG-HGUT-00189	Coprococcus sp900066115	ERS746889	ERP010700	United Kingdom	Europe	ftp://ftp.ebi.ac.uk/pub/databases/metagenomics/mgnify_genomes/human-gut/v1.0/all_genomes/MGYG-HGUT-001/MGYG-HGUT-00189/genomes1/GUT_GENOME253004.gff.gz		4
GUT_GENOME253046	XieH_2016__YSZC12003_35739__bin.42	CIBIO	MAG	2952051	19	250811	44.02	98.66	0		0	0	11.21	19		GUT_GENOME001379	MGYG-HGUT-00231	Coprococcus eutactus_A	ERS746739	ERP010700	United Kingdom	Europe	ftp://ftp.ebi.ac.uk/pub/databases/metagenomics/mgnify_genomes/human-gut/v1.0/all_genomes/MGYG-HGUT-002/MGYG-HGUT-00231/genomes4/GUT_GENOME253046.gff.gz		2
GUT_GENOME253395	XieH_2016__YSZC12003_35980__bin.56	CIBIO	MAG	2642421	33	143749	41.01	98.85	0		0	0	0	14		GUT_GENOME103847	MGYG-HGUT-01707	Coprococcus sp000154245	ERS746744	ERP010700	United Kingdom	Europe	ftp://ftp.ebi.ac.uk/pub/databases/metagenomics/mgnify_genomes/human-gut/v1.0/all_genomes/MGYG-HGUT-017/MGYG-HGUT-01707/genomes1/GUT_GENOME253395.gff.gz		5
GUT_GENOME253410	XieH_2016__YSZC12003_35980__bin.87	CIBIO	MAG	2784156	40	139120	43.12	98.41	0		0	18.66	0	14		GUT_GENOME000055	MGYG-HGUT-00018	Coprococcus eutactus	ERS746744	ERP010700	United Kingdom	Europe	ftp://ftp.ebi.ac.uk/pub/databases/metagenomics/mgnify_genomes/human-gut/v1.0/all_genomes/MGYG-HGUT-000/MGYG-HGUT-00018/genomes1/GUT_GENOME253410.gff.gz		1
GUT_GENOME253477	XieH_2016__YSZC12003_35989__bin.8	CIBIO	MAG	2631647	34	102659	41.25	98.66	0		0	36.79	0	15		GUT_GENOME001027	MGYG-HGUT-00189	Coprococcus sp900066115	ERS746843	ERP010700	United Kingdom	Europe	ftp://ftp.ebi.ac.uk/pub/databases/metagenomics/mgnify_genomes/human-gut/v1.0/all_genomes/MGYG-HGUT-001/MGYG-HGUT-00189/genomes2/GUT_GENOME253477.gff.gz		4
GUT_GENOME253516	XieH_2016__YSZC12003_35990__bin.82	CIBIO	MAG	2995058	31	231985	43.43	99.33	0.96		0	0	0	17		GUT_GENOME001379	MGYG-HGUT-00231	Coprococcus eutactus_A	ERS746890	ERP010700	United Kingdom	Europe	ftp://ftp.ebi.ac.uk/pub/databases/metagenomics/mgnify_genomes/human-gut/v1.0/all_genomes/MGYG-HGUT-002/MGYG-HGUT-00231/genomes3/GUT_GENOME253516.gff.gz		2
GUT_GENOME253636	XieH_2016__YSZC12003_35999__bin.39	CIBIO	MAG	2602749	32	234964	40.9	98.66	0		0	0	10.74	15		GUT_GENOME103847	MGYG-HGUT-01707	Coprococcus sp000154245	ERS746943	ERP010700	United Kingdom	Europe	ftp://ftp.ebi.ac.uk/pub/databases/metagenomics/mgnify_genomes/human-gut/v1.0/all_genomes/MGYG-HGUT-017/MGYG-HGUT-01707/genomes1/GUT_GENOME253636.gff.gz		5
GUT_GENOME253824	XieH_2016__YSZC12003_36007__bin.34	CIBIO	MAG	2902278	26	177427	44.07	99.33	0		0	0	0	16		GUT_GENOME001379	MGYG-HGUT-00231	Coprococcus eutactus_A	ERS746891	ERP010700	United Kingdom	Europe	ftp://ftp.ebi.ac.uk/pub/databases/metagenomics/mgnify_genomes/human-gut/v1.0/all_genomes/MGYG-HGUT-002/MGYG-HGUT-00231/genomes2/GUT_GENOME253824.gff.gz		2
GUT_GENOME254038	XieH_2016__YSZC12003_36033__bin.108	CIBIO	MAG	2697515	30	148954	40.9	99.33	0.13		0	0	0	16		GUT_GENOME103847	MGYG-HGUT-01707	Coprococcus sp000154245	ERS746750	ERP010700	United Kingdom	Europe	ftp://ftp.ebi.ac.uk/pub/databases/metagenomics/mgnify_genomes/human-gut/v1.0/all_genomes/MGYG-HGUT-017/MGYG-HGUT-01707/genomes1/GUT_GENOME254038.gff.gz		5
GUT_GENOME254434	XieH_2016__YSZC12003_36056__bin.71	CIBIO	MAG	2691512	31	187265	41.23	97.99	0.67		0	0	11.21	18		GUT_GENOME001027	MGYG-HGUT-00189	Coprococcus sp900066115	ERS746753	ERP010700	United Kingdom	Europe	ftp://ftp.ebi.ac.uk/pub/databases/metagenomics/mgnify_genomes/human-gut/v1.0/all_genomes/MGYG-HGUT-001/MGYG-HGUT-00189/genomes2/GUT_GENOME254434.gff.gz		4
GUT_GENOME254772	XieH_2016__YSZC12003_36211__bin.31	CIBIO	MAG	3079841	30	176144	42.5	99.33	0		0	46.9	0	17		GUT_GENOME000055	MGYG-HGUT-00018	Coprococcus eutactus	ERS746759	ERP010700	United Kingdom	Europe	ftp://ftp.ebi.ac.uk/pub/databases/metagenomics/mgnify_genomes/human-gut/v1.0/all_genomes/MGYG-HGUT-000/MGYG-HGUT-00018/genomes1/GUT_GENOME254772.gff.gz		1
GUT_GENOME255144	XieH_2016__YSZC12003_36453__bin.75	CIBIO	MAG	2863914	21	252536	44.04	97.32	0		0	46.9	0	18		GUT_GENOME001379	MGYG-HGUT-00231	Coprococcus eutactus_A	ERS746764	ERP010700	United Kingdom	Europe	ftp://ftp.ebi.ac.uk/pub/databases/metagenomics/mgnify_genomes/human-gut/v1.0/all_genomes/MGYG-HGUT-002/MGYG-HGUT-00231/genomes1/GUT_GENOME255144.gff.gz		2
GUT_GENOME255248	XieH_2016__YSZC12003_36474__bin.18	CIBIO	MAG	2911711	24	226193	42.77	99.33	0		0	0	0	18		GUT_GENOME000055	MGYG-HGUT-00018	Coprococcus eutactus	ERS746854	ERP010700	United Kingdom	Europe	ftp://ftp.ebi.ac.uk/pub/databases/metagenomics/mgnify_genomes/human-gut/v1.0/all_genomes/MGYG-HGUT-000/MGYG-HGUT-00018/genomes1/GUT_GENOME255248.gff.gz		1
GUT_GENOME255327	XieH_2016__YSZC12003_36521__bin.96	CIBIO	MAG	2583746	28	192259	41.22	97.99	0.67		0	37.51	0	15		GUT_GENOME001027	MGYG-HGUT-00189	Coprococcus sp900066115	ERS746767	ERP010700	United Kingdom	Europe	ftp://ftp.ebi.ac.uk/pub/databases/metagenomics/mgnify_genomes/human-gut/v1.0/all_genomes/MGYG-HGUT-001/MGYG-HGUT-00189/genomes1/GUT_GENOME255327.gff.gz		4
GUT_GENOME255470	XieH_2016__YSZC12003_36533__bin.15	CIBIO	MAG	2629706	27	162069	41.14	98.66	0.02		0	0	11.21	16		GUT_GENOME103847	MGYG-HGUT-01707	Coprococcus sp000154245	ERS746856	ERP010700	United Kingdom	Europe	ftp://ftp.ebi.ac.uk/pub/databases/metagenomics/mgnify_genomes/human-gut/v1.0/all_genomes/MGYG-HGUT-017/MGYG-HGUT-01707/genomes1/GUT_GENOME255470.gff.gz		5
GUT_GENOME255532	XieH_2016__YSZC12003_36534__bin.55	CIBIO	MAG	2875741	24	196261	44.04	97.32	0		0	26.09	10.74	16		GUT_GENOME001379	MGYG-HGUT-00231	Coprococcus eutactus_A	ERS746770	ERP010700	United Kingdom	Europe	ftp://ftp.ebi.ac.uk/pub/databases/metagenomics/mgnify_genomes/human-gut/v1.0/all_genomes/MGYG-HGUT-002/MGYG-HGUT-00231/genomes3/GUT_GENOME255532.gff.gz		2
GUT_GENOME255569	XieH_2016__YSZC12003_36587__bin.55	CIBIO	MAG	3024792	29	192025	43.71	99.33	0.22		0	9.39	10.74	18		GUT_GENOME001379	MGYG-HGUT-00231	Coprococcus eutactus_A	ERS746771	ERP010700	United Kingdom	Europe	ftp://ftp.ebi.ac.uk/pub/databases/metagenomics/mgnify_genomes/human-gut/v1.0/all_genomes/MGYG-HGUT-002/MGYG-HGUT-00231/genomes2/GUT_GENOME255569.gff.gz		2
GUT_GENOME255671	XieH_2016__YSZC12003_36666__bin.68	CIBIO	MAG	2802555	113	38276	43.11	96.95	0.02		0	0	9.3	18		GUT_GENOME000055	MGYG-HGUT-00018	Coprococcus eutactus	ERS746773	ERP010700	United Kingdom	Europe	ftp://ftp.ebi.ac.uk/pub/databases/metagenomics/mgnify_genomes/human-gut/v1.0/all_genomes/MGYG-HGUT-000/MGYG-HGUT-00018/genomes1/GUT_GENOME255671.gff.gz		1
GUT_GENOME255937	XieH_2016__YSZC12003_36696__bin.114	CIBIO	MAG	2847074	35	166384	44.08	98.99	0		0	0	0	16		GUT_GENOME001379	MGYG-HGUT-00231	Coprococcus eutactus_A	ERS746778	ERP010700	United Kingdom	Europe	ftp://ftp.ebi.ac.uk/pub/databases/metagenomics/mgnify_genomes/human-gut/v1.0/all_genomes/MGYG-HGUT-002/MGYG-HGUT-00231/genomes1/GUT_GENOME255937.gff.gz		2
GUT_GENOME256212	XieH_2016__YSZC12003_36795__bin.11	CIBIO	MAG	2853466	20	210094	44.07	99.33	0		0	0	11.21	19		GUT_GENOME001379	MGYG-HGUT-00231	Coprococcus eutactus_A	ERS746859	ERP010700	United Kingdom	Europe	ftp://ftp.ebi.ac.uk/pub/databases/metagenomics/mgnify_genomes/human-gut/v1.0/all_genomes/MGYG-HGUT-002/MGYG-HGUT-00231/genomes2/GUT_GENOME256212.gff.gz		2
GUT_GENOME256352	XieH_2016__YSZC12003_37097__bin.17	CIBIO	MAG	2954941	17	254074	43.91	95.3	0		0	0	0	19		GUT_GENOME001379	MGYG-HGUT-00231	Coprococcus eutactus_A	ERS746861	ERP010700	United Kingdom	Europe	ftp://ftp.ebi.ac.uk/pub/databases/metagenomics/mgnify_genomes/human-gut/v1.0/all_genomes/MGYG-HGUT-002/MGYG-HGUT-00231/genomes1/GUT_GENOME256352.gff.gz		2
GUT_GENOME256659	XieH_2016__YSZC12003_37105__bin.72	CIBIO	MAG	2848225	32	159930	41.03	99.33	0		0	0	0	16		GUT_GENOME001027	MGYG-HGUT-00189	Coprococcus sp000154245	ERS746784	ERP010700	United Kingdom	Europe	ftp://ftp.ebi.ac.uk/pub/databases/metagenomics/mgnify_genomes/human-gut/v1.0/all_genomes/MGYG-HGUT-001/MGYG-HGUT-00189/genomes1/GUT_GENOME256659.gff.gz		5
GUT_GENOME256685	XieH_2016__YSZC12003_37126__bin.44	CIBIO	MAG	2644283	48	91636	41.1	98.35	0.13		0	0	5.95	17		GUT_GENOME001027	MGYG-HGUT-00189	Coprococcus sp000154245	ERS746863	ERP010700	United Kingdom	Europe	ftp://ftp.ebi.ac.uk/pub/databases/metagenomics/mgnify_genomes/human-gut/v1.0/all_genomes/MGYG-HGUT-001/MGYG-HGUT-00189/genomes2/GUT_GENOME256685.gff.gz		5
GUT_GENOME256764	XieH_2016__YSZC12003_37133__bin.30	CIBIO	MAG	2633475	68	83982	41.33	98.66	0		0	0	11.21	12		GUT_GENOME001027	MGYG-HGUT-00189	Coprococcus sp900066115	ERS746898	ERP010700	United Kingdom	Europe	ftp://ftp.ebi.ac.uk/pub/databases/metagenomics/mgnify_genomes/human-gut/v1.0/all_genomes/MGYG-HGUT-001/MGYG-HGUT-00189/genomes2/GUT_GENOME256764.gff.gz		4
GUT_GENOME256799	XieH_2016__YSZC12003_37133__bin.88	CIBIO	MAG	2953810	34	149024	43.84	99.12	0.34		0	0	0	17		GUT_GENOME001379	MGYG-HGUT-00231	Coprococcus eutactus_A	ERS746898	ERP010700	United Kingdom	Europe	ftp://ftp.ebi.ac.uk/pub/databases/metagenomics/mgnify_genomes/human-gut/v1.0/all_genomes/MGYG-HGUT-002/MGYG-HGUT-00231/genomes1/GUT_GENOME256799.gff.gz		2
GUT_GENOME256852	XieH_2016__YSZC12003_37134__bin.9	CIBIO	MAG	2448459	166	22856	42.76	95.32	0.58		0	11.29	19.69	16		GUT_GENOME095993	MGYG-HGUT-01315	Coprococcus comes	ERS746785	ERP010700	United Kingdom	Europe	ftp://ftp.ebi.ac.uk/pub/databases/metagenomics/mgnify_genomes/human-gut/v1.0/all_genomes/MGYG-HGUT-013/MGYG-HGUT-01315/genomes1/GUT_GENOME256852.gff.gz		3
GUT_GENOME256871	XieH_2016__YSZC12003_37135__bin.47	CIBIO	MAG	2533864	134	37282	44.51	95.08	0.45		0	0	0	14		GUT_GENOME001379	MGYG-HGUT-00231	Coprococcus eutactus_A	ERS746786	ERP010700	United Kingdom	Europe	ftp://ftp.ebi.ac.uk/pub/databases/metagenomics/mgnify_genomes/human-gut/v1.0/all_genomes/MGYG-HGUT-002/MGYG-HGUT-00231/genomes3/GUT_GENOME256871.gff.gz		2
GUT_GENOME257150	XieH_2016__YSZC12003_37173__bin.80	CIBIO	MAG	2987218	33	146613	43.91	97.99	0		0	0	0	18		GUT_GENOME001379	MGYG-HGUT-00231	Coprococcus eutactus_A	ERS746791	ERP010700	United Kingdom	Europe	ftp://ftp.ebi.ac.uk/pub/databases/metagenomics/mgnify_genomes/human-gut/v1.0/all_genomes/MGYG-HGUT-002/MGYG-HGUT-00231/genomes2/GUT_GENOME257150.gff.gz		2
GUT_GENOME257979	XieH_2016__YSZC12003_37205__bin.33	CIBIO	MAG	2881456	32	140741	43.11	97.32	0.67		0	0	0	18		GUT_GENOME000055	MGYG-HGUT-00018	Coprococcus eutactus	ERS746870	ERP010700	United Kingdom	Europe	ftp://ftp.ebi.ac.uk/pub/databases/metagenomics/mgnify_genomes/human-gut/v1.0/all_genomes/MGYG-HGUT-000/MGYG-HGUT-00018/genomes1/GUT_GENOME257979.gff.gz		1
GUT_GENOME258271	XieH_2016__YSZC12003_37223__bin.7	CIBIO	MAG	2785728	64	68938	44.12	95.97	0		0	0	0	19		GUT_GENOME001379	MGYG-HGUT-00231	Coprococcus eutactus_A	ERS746804	ERP010700	United Kingdom	Europe	ftp://ftp.ebi.ac.uk/pub/databases/metagenomics/mgnify_genomes/human-gut/v1.0/all_genomes/MGYG-HGUT-002/MGYG-HGUT-00231/genomes4/GUT_GENOME258271.gff.gz		2
GUT_GENOME258310	XieH_2016__YSZC12003_37228__bin.50	CIBIO	MAG	2815490	37	103226	44.06	99.33	0		0	37.51	0	17		GUT_GENOME001379	MGYG-HGUT-00231	Coprococcus eutactus_A	ERS746873	ERP010700	United Kingdom	Europe	ftp://ftp.ebi.ac.uk/pub/databases/metagenomics/mgnify_genomes/human-gut/v1.0/all_genomes/MGYG-HGUT-002/MGYG-HGUT-00231/genomes1/GUT_GENOME258310.gff.gz		2
GUT_GENOME258340	XieH_2016__YSZC12003_37229__bin.25	CIBIO	MAG	2642025	124	34519	44.46	96.48	0.34		0	0	0	14		GUT_GENOME001379	MGYG-HGUT-00231	Coprococcus eutactus_A	ERS746805	ERP010700	United Kingdom	Europe	ftp://ftp.ebi.ac.uk/pub/databases/metagenomics/mgnify_genomes/human-gut/v1.0/all_genomes/MGYG-HGUT-002/MGYG-HGUT-00231/genomes2/GUT_GENOME258340.gff.gz		2
GUT_GENOME258475	XieH_2016__YSZC12003_37233__bin.97	CIBIO	MAG	2969114	29	161251	43.9	99.33	0.84		0	47.68	0	18		GUT_GENOME001379	MGYG-HGUT-00231	Coprococcus eutactus_A	ERS746806	ERP010700	United Kingdom	Europe	ftp://ftp.ebi.ac.uk/pub/databases/metagenomics/mgnify_genomes/human-gut/v1.0/all_genomes/MGYG-HGUT-002/MGYG-HGUT-00231/genomes3/GUT_GENOME258475.gff.gz		2
GUT_GENOME258547	XieH_2016__YSZC12003_37255__bin.43	CIBIO	MAG	2830655	54	95254	44.13	98.7	0		0	0	0	14		GUT_GENOME001379	MGYG-HGUT-00231	Coprococcus eutactus_A	ERS746874	ERP010700	United Kingdom	Europe	ftp://ftp.ebi.ac.uk/pub/databases/metagenomics/mgnify_genomes/human-gut/v1.0/all_genomes/MGYG-HGUT-002/MGYG-HGUT-00231/genomes1/GUT_GENOME258547.gff.gz		2
GUT_GENOME258757	XieH_2016__YSZC12003_37270__bin.50	CIBIO	MAG	2871705	34	101957	44.02	98.83	0		0	52.51	0	18		GUT_GENOME001379	MGYG-HGUT-00231	Coprococcus eutactus_A	ERS746908	ERP010700	United Kingdom	Europe	ftp://ftp.ebi.ac.uk/pub/databases/metagenomics/mgnify_genomes/human-gut/v1.0/all_genomes/MGYG-HGUT-002/MGYG-HGUT-00231/genomes3/GUT_GENOME258757.gff.gz		2
GUT_GENOME258887	XieH_2016__YSZC12003_37282__bin.15	CIBIO	MAG	2877415	24	180126	43.93	99.33	0.67		0	46.9	0	17		GUT_GENOME001379	MGYG-HGUT-00231	Coprococcus eutactus_A	ERS746811	ERP010700	United Kingdom	Europe	ftp://ftp.ebi.ac.uk/pub/databases/metagenomics/mgnify_genomes/human-gut/v1.0/all_genomes/MGYG-HGUT-002/MGYG-HGUT-00231/genomes1/GUT_GENOME258887.gff.gz		2
GUT_GENOME259128	XieH_2016__YSZC12003_37292__bin.88	CIBIO	MAG	2829958	42	148153	44.15	97.32	0		0	15.72	0	15		GUT_GENOME001379	MGYG-HGUT-00231	Coprococcus eutactus_A	ERS746910	ERP010700	United Kingdom	Europe	ftp://ftp.ebi.ac.uk/pub/databases/metagenomics/mgnify_genomes/human-gut/v1.0/all_genomes/MGYG-HGUT-002/MGYG-HGUT-00231/genomes2/GUT_GENOME259128.gff.gz		2
GUT_GENOME259790	XieH_2016__YSZC12003_37330__bin.92	CIBIO	MAG	2747286	29	185979	44.19	99.33	0		0	0	0	15		GUT_GENOME001379	MGYG-HGUT-00231	Coprococcus eutactus_A	ERS746955	ERP010700	United Kingdom	Europe	ftp://ftp.ebi.ac.uk/pub/databases/metagenomics/mgnify_genomes/human-gut/v1.0/all_genomes/MGYG-HGUT-002/MGYG-HGUT-00231/genomes3/GUT_GENOME259790.gff.gz		2
GUT_GENOME259806	XieH_2016__YSZC12003_37331__bin.30	CIBIO	MAG	2524474	33	112464	41.03	98.32	0		0	0	0	16		GUT_GENOME001027	MGYG-HGUT-00189	Coprococcus sp000154245	ERS746914	ERP010700	United Kingdom	Europe	ftp://ftp.ebi.ac.uk/pub/databases/metagenomics/mgnify_genomes/human-gut/v1.0/all_genomes/MGYG-HGUT-001/MGYG-HGUT-00189/genomes1/GUT_GENOME259806.gff.gz		5
GUT_GENOME259926	XieH_2016__YSZC12003_37333__bin.55	CIBIO	MAG	2928829	21	191500	44.11	99.33	0		0	70.52	0	17		GUT_GENOME001379	MGYG-HGUT-00231	Coprococcus eutactus_A	ERS746915	ERP010700	United Kingdom	Europe	ftp://ftp.ebi.ac.uk/pub/databases/metagenomics/mgnify_genomes/human-gut/v1.0/all_genomes/MGYG-HGUT-002/MGYG-HGUT-00231/genomes2/GUT_GENOME259926.gff.gz		2
GUT_GENOME259981	XieH_2016__YSZC12003_37336__bin.7	CIBIO	MAG	2951644	24	212756	44.02	97.99	0		0	0	0	17		GUT_GENOME001379	MGYG-HGUT-00231	Coprococcus eutactus_A	ERS746916	ERP010700	United Kingdom	Europe	ftp://ftp.ebi.ac.uk/pub/databases/metagenomics/mgnify_genomes/human-gut/v1.0/all_genomes/MGYG-HGUT-002/MGYG-HGUT-00231/genomes3/GUT_GENOME259981.gff.gz		2
GUT_GENOME260025	XieH_2016__YSZC12003_37337__bin.73	CIBIO	MAG	2986910	31	156857	43.81	98.29	0.34		0	0	0	18		GUT_GENOME001379	MGYG-HGUT-00231	Coprococcus eutactus_A	ERS746917	ERP010700	United Kingdom	Europe	ftp://ftp.ebi.ac.uk/pub/databases/metagenomics/mgnify_genomes/human-gut/v1.0/all_genomes/MGYG-HGUT-002/MGYG-HGUT-00231/genomes1/GUT_GENOME260025.gff.gz		2
GUT_GENOME260101	XieH_2016__YSZC12003_37349__bin.45	CIBIO	MAG	2549136	42	108355	41.18	99.33	0		0	0	0	15		GUT_GENOME001027	MGYG-HGUT-00189	Coprococcus sp000154245	ERS746919	ERP010700	United Kingdom	Europe	ftp://ftp.ebi.ac.uk/pub/databases/metagenomics/mgnify_genomes/human-gut/v1.0/all_genomes/MGYG-HGUT-001/MGYG-HGUT-00189/genomes2/GUT_GENOME260101.gff.gz		5
GUT_GENOME260480	XieH_2016__YSZC12003_37461__bin.7	CIBIO	MAG	2710427	30	151982	41.18	99.33	0.67		0	70.71	0	16		GUT_GENOME001027	MGYG-HGUT-00189	Coprococcus sp000154245	ERS746826	ERP010700	United Kingdom	Europe	ftp://ftp.ebi.ac.uk/pub/databases/metagenomics/mgnify_genomes/human-gut/v1.0/all_genomes/MGYG-HGUT-001/MGYG-HGUT-00189/genomes2/GUT_GENOME260480.gff.gz		5
GUT_GENOME260601	XieH_2016__YSZC12003_37545__bin.29	CIBIO	MAG	2584112	37	140599	41.06	99.33	0		0	0	0	17		GUT_GENOME001027	MGYG-HGUT-00189	Coprococcus sp000154245	ERS746926	ERP010700	United Kingdom	Europe	ftp://ftp.ebi.ac.uk/pub/databases/metagenomics/mgnify_genomes/human-gut/v1.0/all_genomes/MGYG-HGUT-001/MGYG-HGUT-00189/genomes1/GUT_GENOME260601.gff.gz		5
GUT_GENOME260698	XieH_2016__YSZC12003_37583__bin.41	CIBIO	MAG	2609608	36	134917	41	99.33	0		0	0	0	15		GUT_GENOME001027	MGYG-HGUT-00189	Coprococcus sp000154245	ERS746928	ERP010700	United Kingdom	Europe	ftp://ftp.ebi.ac.uk/pub/databases/metagenomics/mgnify_genomes/human-gut/v1.0/all_genomes/MGYG-HGUT-001/MGYG-HGUT-00189/genomes2/GUT_GENOME260698.gff.gz		5
GUT_GENOME260737	XieH_2016__YSZC12003_37584__bin.28	CIBIO	MAG	2780664	27	177933	44.24	97.32	0		0	0	0	16		GUT_GENOME001379	MGYG-HGUT-00231	Coprococcus eutactus_A	ERS746929	ERP010700	United Kingdom	Europe	ftp://ftp.ebi.ac.uk/pub/databases/metagenomics/mgnify_genomes/human-gut/v1.0/all_genomes/MGYG-HGUT-002/MGYG-HGUT-00231/genomes3/GUT_GENOME260737.gff.gz		2
GUT_GENOME261056	XieH_2016__YSZC12003_37797__bin.71	CIBIO	MAG	2889537	28	166187	44.06	99.33	0.34		0	18.46	10.77	16		GUT_GENOME001379	MGYG-HGUT-00231	Coprococcus eutactus_A	ERS746958	ERP010700	United Kingdom	Europe	ftp://ftp.ebi.ac.uk/pub/databases/metagenomics/mgnify_genomes/human-gut/v1.0/all_genomes/MGYG-HGUT-002/MGYG-HGUT-00231/genomes1/GUT_GENOME261056.gff.gz		2
GUT_GENOME261257	XieH_2016__YSZC12003_37877__bin.4	CIBIO	MAG	2753076	23	180234	43.15	99.33	0		0	0	0	16		GUT_GENOME000055	MGYG-HGUT-00018	Coprococcus eutactus	ERS746937	ERP010700	United Kingdom	Europe	ftp://ftp.ebi.ac.uk/pub/databases/metagenomics/mgnify_genomes/human-gut/v1.0/all_genomes/MGYG-HGUT-000/MGYG-HGUT-00018/genomes1/GUT_GENOME261257.gff.gz		1
GUT_GENOME262529	YuJ_2015__SZAXPI015225-18__bin.45	CIBIO	MAG	2601943	44	93603	41.16	98.66	0.13		0	0	0	16		GUT_GENOME001027	MGYG-HGUT-00189	Coprococcus sp000154245	ERS848663		China	Asia	ftp://ftp.ebi.ac.uk/pub/databases/metagenomics/mgnify_genomes/human-gut/v1.0/all_genomes/MGYG-HGUT-001/MGYG-HGUT-00189/genomes1/GUT_GENOME262529.gff.gz		5
GUT_GENOME262865	YuJ_2015__SZAXPI015241-27__bin.24	CIBIO	MAG	2898035	20	254377	43.87	99.33	0		0	23.22	0	15		GUT_GENOME001379	MGYG-HGUT-00231	Coprococcus eutactus_A	ERS848678		China	Asia	ftp://ftp.ebi.ac.uk/pub/databases/metagenomics/mgnify_genomes/human-gut/v1.0/all_genomes/MGYG-HGUT-002/MGYG-HGUT-00231/genomes4/GUT_GENOME262865.gff.gz		2
GUT_GENOME262965	YuJ_2015__SZAXPI015245-33__bin.20	CIBIO	MAG	2853775	26	248223	44.06	99.33	0		0	23.22	0	17		GUT_GENOME001379	MGYG-HGUT-00231	Coprococcus eutactus_A	ERS848682		China	Asia	ftp://ftp.ebi.ac.uk/pub/databases/metagenomics/mgnify_genomes/human-gut/v1.0/all_genomes/MGYG-HGUT-002/MGYG-HGUT-00231/genomes2/GUT_GENOME262965.gff.gz		2
GUT_GENOME263067	YuJ_2015__SZAXPI015249-37__bin.5	CIBIO	MAG	2675416	20	177622	41.08	99.33	0		0	0	0	18		GUT_GENOME001027	MGYG-HGUT-00189	Coprococcus sp000154245	ERS848686		China	Asia	ftp://ftp.ebi.ac.uk/pub/databases/metagenomics/mgnify_genomes/human-gut/v1.0/all_genomes/MGYG-HGUT-001/MGYG-HGUT-00189/genomes1/GUT_GENOME263067.gff.gz		5
GUT_GENOME263127	YuJ_2015__SZAXPI015251-41__bin.34	CIBIO	MAG	2510274	63	59703	41.38	96.64	0		0	0	8.55	19		GUT_GENOME001027	MGYG-HGUT-00189	Coprococcus sp900066115	ERS848688		China	Asia	ftp://ftp.ebi.ac.uk/pub/databases/metagenomics/mgnify_genomes/human-gut/v1.0/all_genomes/MGYG-HGUT-001/MGYG-HGUT-00189/genomes1/GUT_GENOME263127.gff.gz		4
GUT_GENOME263227	YuJ_2015__SZAXPI015255-46__bin.44	CIBIO	MAG	2904141	49	95689	44	98.66	0.67		0	15.79	0	14		GUT_GENOME001379	MGYG-HGUT-00231	Coprococcus eutactus_A	ERS848692		China	Asia	ftp://ftp.ebi.ac.uk/pub/databases/metagenomics/mgnify_genomes/human-gut/v1.0/all_genomes/MGYG-HGUT-002/MGYG-HGUT-00231/genomes2/GUT_GENOME263227.gff.gz		2
GUT_GENOME263389	YuJ_2015__SZAXPI015262-79__bin.35	CIBIO	MAG	2607618	87	46748	41.19	97.5	0		0	0	11.21	16		GUT_GENOME001027	MGYG-HGUT-00189	Coprococcus sp900066115	ERS848699		China	Asia	ftp://ftp.ebi.ac.uk/pub/databases/metagenomics/mgnify_genomes/human-gut/v1.0/all_genomes/MGYG-HGUT-001/MGYG-HGUT-00189/genomes2/GUT_GENOME263389.gff.gz		4
GUT_GENOME263446	YuJ_2015__SZAXPI015263-84__bin.57	CIBIO	MAG	2581981	34	176585	44.39	97.65	0		0	0	0	16		GUT_GENOME001379	MGYG-HGUT-00231	Coprococcus eutactus_A	ERS848700		China	Asia	ftp://ftp.ebi.ac.uk/pub/databases/metagenomics/mgnify_genomes/human-gut/v1.0/all_genomes/MGYG-HGUT-002/MGYG-HGUT-00231/genomes2/GUT_GENOME263446.gff.gz		2
GUT_GENOME263492	YuJ_2015__SZAXPI015264-87__bin.60	CIBIO	MAG	2901464	30	183729	44.06	99.33	0.34		0	17.68	11.21	17		GUT_GENOME001379	MGYG-HGUT-00231	Coprococcus eutactus_A	ERS848701		China	Asia	ftp://ftp.ebi.ac.uk/pub/databases/metagenomics/mgnify_genomes/human-gut/v1.0/all_genomes/MGYG-HGUT-002/MGYG-HGUT-00231/genomes2/GUT_GENOME263492.gff.gz		2
GUT_GENOME263662	YuJ_2015__SZAXPI015270-90__bin.60	CIBIO	MAG	2727588	22	213773	44.05	95.3	0		0	37.51	0	14		GUT_GENOME001379	MGYG-HGUT-00231	Coprococcus eutactus_A	ERS848707		China	Asia	ftp://ftp.ebi.ac.uk/pub/databases/metagenomics/mgnify_genomes/human-gut/v1.0/all_genomes/MGYG-HGUT-002/MGYG-HGUT-00231/genomes2/GUT_GENOME263662.gff.gz		2
GUT_GENOME263675	YuJ_2015__SZAXPI015271-93__bin.19	CIBIO	MAG	2467857	87	50710	41.75	97.77	0		0	0	12.17	15		GUT_GENOME140272	MGYG-HGUT-02289	Coprococcus sp000433075	ERS848708		China	Asia	ftp://ftp.ebi.ac.uk/pub/databases/metagenomics/mgnify_genomes/human-gut/v1.0/all_genomes/MGYG-HGUT-022/MGYG-HGUT-02289/genomes1/GUT_GENOME263675.gff.gz		8
GUT_GENOME263820	YuJ_2015__SZAXPI017454-20__bin.23	CIBIO	MAG	2837449	18	187840	43.92	99.33	0		0	70.71	0	16		GUT_GENOME001379	MGYG-HGUT-00231	Coprococcus eutactus_A	ERS848715		China	Asia	ftp://ftp.ebi.ac.uk/pub/databases/metagenomics/mgnify_genomes/human-gut/v1.0/all_genomes/MGYG-HGUT-002/MGYG-HGUT-00231/genomes3/GUT_GENOME263820.gff.gz		2
GUT_GENOME264013	YuJ_2015__SZAXPI017462-33__bin.8	CIBIO	MAG	2591287	53	87978	41.37	98.32	0.13		0	0	0	18		GUT_GENOME001027	MGYG-HGUT-00189	Coprococcus sp900066115	ERS848723		China	Asia	ftp://ftp.ebi.ac.uk/pub/databases/metagenomics/mgnify_genomes/human-gut/v1.0/all_genomes/MGYG-HGUT-001/MGYG-HGUT-00189/genomes1/GUT_GENOME264013.gff.gz		4
GUT_GENOME264116	YuJ_2015__SZAXPI017467-87__bin.42	CIBIO	MAG	2850292	33	238272	43.04	95.97	0		0	0	0	16		GUT_GENOME000055	MGYG-HGUT-00018	Coprococcus eutactus	ERS848728		China	Asia	ftp://ftp.ebi.ac.uk/pub/databases/metagenomics/mgnify_genomes/human-gut/v1.0/all_genomes/MGYG-HGUT-000/MGYG-HGUT-00018/genomes1/GUT_GENOME264116.gff.gz		1
GUT_GENOME264299	YuJ_2015__SZAXPI017588-123__bin.49	CIBIO	MAG	2817183	25	277958	44.08	99.33	0		0	0	0	19		GUT_GENOME001379	MGYG-HGUT-00231	Coprococcus eutactus_A	ERS848738		China	Asia	ftp://ftp.ebi.ac.uk/pub/databases/metagenomics/mgnify_genomes/human-gut/v1.0/all_genomes/MGYG-HGUT-002/MGYG-HGUT-00231/genomes2/GUT_GENOME264299.gff.gz		2
GUT_GENOME264383	YuJ_2015__SZAXPI017591-140__bin.72	CIBIO	MAG	2964699	34	146576	42.73	99.33	0.24		0	0	14.53	16		GUT_GENOME105828	MGYG-HGUT-01745	Coprococcus sp.	ERS848741		China	Asia	ftp://ftp.ebi.ac.uk/pub/databases/metagenomics/mgnify_genomes/human-gut/v1.0/all_genomes/MGYG-HGUT-017/MGYG-HGUT-01745/genomes1/GUT_GENOME264383.gff.gz		7
GUT_GENOME264470	YuJ_2015__SZAXPI017594-166__bin.46	CIBIO	MAG	2850529	25	158130	44.05	99.33	0		0	0	0	16		GUT_GENOME001379	MGYG-HGUT-00231	Coprococcus eutactus_A	ERS848744		China	Asia	ftp://ftp.ebi.ac.uk/pub/databases/metagenomics/mgnify_genomes/human-gut/v1.0/all_genomes/MGYG-HGUT-002/MGYG-HGUT-00231/genomes2/GUT_GENOME264470.gff.gz		2
GUT_GENOME264573	ZeeviD_2015__PNP_DietIntervention_18__bin.6	CIBIO	MAG	2630336	157	25200	43.22	96.94	0.95		0	0	0	14		GUT_GENOME000055	MGYG-HGUT-00018	Coprococcus eutactus	ERS972456	ERP012929	Israel	Asia	ftp://ftp.ebi.ac.uk/pub/databases/metagenomics/mgnify_genomes/human-gut/v1.0/all_genomes/MGYG-HGUT-000/MGYG-HGUT-00018/genomes1/GUT_GENOME264573.gff.gz		1
GUT_GENOME264599	ZeeviD_2015__PNP_DietIntervention_20__bin.39	CIBIO	MAG	2793869	58	68200	44.26	100	0.67		0	0	6.09	18		GUT_GENOME001379	MGYG-HGUT-00231	Coprococcus eutactus_A	ERS972458	ERP012929	Israel	Asia	ftp://ftp.ebi.ac.uk/pub/databases/metagenomics/mgnify_genomes/human-gut/v1.0/all_genomes/MGYG-HGUT-002/MGYG-HGUT-00231/genomes3/GUT_GENOME264599.gff.gz		2
GUT_GENOME264696	ZeeviD_2015__PNP_DietIntervention_28__bin.73	CIBIO	MAG	2676896	55	77400	41.28	99.33	0.67		0	0	16	18		GUT_GENOME001027	MGYG-HGUT-00189	Coprococcus sp900066115	ERS972466	ERP012929	Israel	Asia	ftp://ftp.ebi.ac.uk/pub/databases/metagenomics/mgnify_genomes/human-gut/v1.0/all_genomes/MGYG-HGUT-001/MGYG-HGUT-00189/genomes2/GUT_GENOME264696.gff.gz		4
GUT_GENOME264752	ZeeviD_2015__PNP_DietIntervention_30__bin.8	CIBIO	MAG	2382826	100	36451	41.32	95.39	0		0	0	0	15		GUT_GENOME001027	MGYG-HGUT-00189	Coprococcus sp000154245	ERS972468	ERP012929	Israel	Asia	ftp://ftp.ebi.ac.uk/pub/databases/metagenomics/mgnify_genomes/human-gut/v1.0/all_genomes/MGYG-HGUT-001/MGYG-HGUT-00189/genomes1/GUT_GENOME264752.gff.gz		5
GUT_GENOME265059	ZeeviD_2015__PNP_DietIntervention_49__bin.27	CIBIO	MAG	2866223	31	142071	44.13	97.99	0		0	0	6.09	17		GUT_GENOME001379	MGYG-HGUT-00231	Coprococcus eutactus_A	ERS972487	ERP012929	Israel	Asia	ftp://ftp.ebi.ac.uk/pub/databases/metagenomics/mgnify_genomes/human-gut/v1.0/all_genomes/MGYG-HGUT-002/MGYG-HGUT-00231/genomes1/GUT_GENOME265059.gff.gz		2
GUT_GENOME265163	ZeeviD_2015__PNP_DietIntervention_56__bin.16	CIBIO	MAG	2684363	104	39526	43.26	98.52	0.02		0	0	0	10		GUT_GENOME000055	MGYG-HGUT-00018	Coprococcus eutactus	ERS972494	ERP012929	Israel	Asia	ftp://ftp.ebi.ac.uk/pub/databases/metagenomics/mgnify_genomes/human-gut/v1.0/all_genomes/MGYG-HGUT-000/MGYG-HGUT-00018/genomes1/GUT_GENOME265163.gff.gz		1
GUT_GENOME265242	ZeeviD_2015__PNP_Main_100__bin.15	CIBIO	MAG	2262834	54	56804	41.99	98.66	0		0	25.51	0	18		GUT_GENOME140272	MGYG-HGUT-02289	Coprococcus sp000433075	ERS971738	ERP012929	Israel	Asia	ftp://ftp.ebi.ac.uk/pub/databases/metagenomics/mgnify_genomes/human-gut/v1.0/all_genomes/MGYG-HGUT-022/MGYG-HGUT-02289/genomes1/GUT_GENOME265242.gff.gz		8
GUT_GENOME265323	ZeeviD_2015__PNP_Main_104__bin.33	CIBIO	MAG	2936991	25	160425	43.9	99.33	0		0	0	6.05	17		GUT_GENOME001379	MGYG-HGUT-00231	Coprococcus eutactus_A	ERS971742	ERP012929	Israel	Asia	ftp://ftp.ebi.ac.uk/pub/databases/metagenomics/mgnify_genomes/human-gut/v1.0/all_genomes/MGYG-HGUT-002/MGYG-HGUT-00231/genomes1/GUT_GENOME265323.gff.gz		2
GUT_GENOME265440	ZeeviD_2015__PNP_Main_109__bin.50	CIBIO	MAG	2783734	93	55598	44.21	99.33	0.89		0	0	6.09	17		GUT_GENOME001379	MGYG-HGUT-00231	Coprococcus eutactus_A	ERS971747	ERP012929	Israel	Asia	ftp://ftp.ebi.ac.uk/pub/databases/metagenomics/mgnify_genomes/human-gut/v1.0/all_genomes/MGYG-HGUT-002/MGYG-HGUT-00231/genomes2/GUT_GENOME265440.gff.gz		2
GUT_GENOME265545	ZeeviD_2015__PNP_Main_114__bin.28	CIBIO	MAG	2839673	24	184163	44.14	98.66	0		0	0	6.09	19		GUT_GENOME001379	MGYG-HGUT-00231	Coprococcus eutactus_A	ERS971752	ERP012929	Israel	Asia	ftp://ftp.ebi.ac.uk/pub/databases/metagenomics/mgnify_genomes/human-gut/v1.0/all_genomes/MGYG-HGUT-002/MGYG-HGUT-00231/genomes2/GUT_GENOME265545.gff.gz		2
GUT_GENOME265623	ZeeviD_2015__PNP_Main_117__bin.18	CIBIO	MAG	2597732	66	58332	41.4	98.43	0.67		0	0	0	14		GUT_GENOME001027	MGYG-HGUT-00189	Coprococcus sp900066115	ERS971755	ERP012929	Israel	Asia	ftp://ftp.ebi.ac.uk/pub/databases/metagenomics/mgnify_genomes/human-gut/v1.0/all_genomes/MGYG-HGUT-001/MGYG-HGUT-00189/genomes1/GUT_GENOME265623.gff.gz		4
GUT_GENOME265662	ZeeviD_2015__PNP_Main_119__bin.2	CIBIO	MAG	2897898	30	190596	43.98	99.33	0		0	0	11.45	18		GUT_GENOME001379	MGYG-HGUT-00231	Coprococcus eutactus_A	ERS971757	ERP012929	Israel	Asia	ftp://ftp.ebi.ac.uk/pub/databases/metagenomics/mgnify_genomes/human-gut/v1.0/all_genomes/MGYG-HGUT-002/MGYG-HGUT-00231/genomes2/GUT_GENOME265662.gff.gz		2
GUT_GENOME265832	ZeeviD_2015__PNP_Main_126__bin.32	CIBIO	MAG	3025525	26	199569	43.97	99.33	0		0	0	16.75	19		GUT_GENOME001379	MGYG-HGUT-00231	Coprococcus eutactus_A	ERS971764	ERP012929	Israel	Asia	ftp://ftp.ebi.ac.uk/pub/databases/metagenomics/mgnify_genomes/human-gut/v1.0/all_genomes/MGYG-HGUT-002/MGYG-HGUT-00231/genomes1/GUT_GENOME265832.gff.gz		2
GUT_GENOME265840	ZeeviD_2015__PNP_Main_127__bin.108	CIBIO	MAG	2781521	25	186137	44.19	99.33	0		0	0	0	17		GUT_GENOME001379	MGYG-HGUT-00231	Coprococcus eutactus_A	ERS971765	ERP012929	Israel	Asia	ftp://ftp.ebi.ac.uk/pub/databases/metagenomics/mgnify_genomes/human-gut/v1.0/all_genomes/MGYG-HGUT-002/MGYG-HGUT-00231/genomes1/GUT_GENOME265840.gff.gz		2
GUT_GENOME265862	ZeeviD_2015__PNP_Main_127__bin.38	CIBIO	MAG	2560769	37	111412	41.26	97.99	0.34		0	0	0	16		GUT_GENOME001027	MGYG-HGUT-00189	Coprococcus sp900066115	ERS971765	ERP012929	Israel	Asia	ftp://ftp.ebi.ac.uk/pub/databases/metagenomics/mgnify_genomes/human-gut/v1.0/all_genomes/MGYG-HGUT-001/MGYG-HGUT-00189/genomes1/GUT_GENOME265862.gff.gz		4
GUT_GENOME265934	ZeeviD_2015__PNP_Main_129__bin.56	CIBIO	MAG	2836378	30	134840	43.05	98.66	0		0	0	0	18		GUT_GENOME000055	MGYG-HGUT-00018	Coprococcus eutactus	ERS971767	ERP012929	Israel	Asia	ftp://ftp.ebi.ac.uk/pub/databases/metagenomics/mgnify_genomes/human-gut/v1.0/all_genomes/MGYG-HGUT-000/MGYG-HGUT-00018/genomes1/GUT_GENOME265934.gff.gz		1
GUT_GENOME266093	ZeeviD_2015__PNP_Main_135__bin.35	CIBIO	MAG	2604878	21	220903	41.32	99.33	0		0	29.22	0	18		GUT_GENOME001027	MGYG-HGUT-00189	Coprococcus sp900066115	ERS971773	ERP012929	Israel	Asia	ftp://ftp.ebi.ac.uk/pub/databases/metagenomics/mgnify_genomes/human-gut/v1.0/all_genomes/MGYG-HGUT-001/MGYG-HGUT-00189/genomes2/GUT_GENOME266093.gff.gz		4
GUT_GENOME266306	ZeeviD_2015__PNP_Main_142__bin.36	CIBIO	MAG	2524431	25	210721	41.31	96.64	0		0	0	0	19		GUT_GENOME001027	MGYG-HGUT-00189	Coprococcus sp900066115	ERS971780	ERP012929	Israel	Asia	ftp://ftp.ebi.ac.uk/pub/databases/metagenomics/mgnify_genomes/human-gut/v1.0/all_genomes/MGYG-HGUT-001/MGYG-HGUT-00189/genomes1/GUT_GENOME266306.gff.gz		4
GUT_GENOME266386	ZeeviD_2015__PNP_Main_146__bin.16	CIBIO	MAG	2919109	18	410159	44.09	99.33	0		0	0	0	19		GUT_GENOME001379	MGYG-HGUT-00231	Coprococcus eutactus_A	ERS971784	ERP012929	Israel	Asia	ftp://ftp.ebi.ac.uk/pub/databases/metagenomics/mgnify_genomes/human-gut/v1.0/all_genomes/MGYG-HGUT-002/MGYG-HGUT-00231/genomes2/GUT_GENOME266386.gff.gz		2
GUT_GENOME266421	ZeeviD_2015__PNP_Main_147__bin.13	CIBIO	MAG	2821300	21	198573	43.86	99.33	0		0	24.33	0	18		GUT_GENOME001379	MGYG-HGUT-00231	Coprococcus eutactus_A	ERS971785	ERP012929	Israel	Asia	ftp://ftp.ebi.ac.uk/pub/databases/metagenomics/mgnify_genomes/human-gut/v1.0/all_genomes/MGYG-HGUT-002/MGYG-HGUT-00231/genomes2/GUT_GENOME266421.gff.gz		2
GUT_GENOME266536	ZeeviD_2015__PNP_Main_14__bin.75	CIBIO	MAG	2590889	31	239981	41.32	99.33	0		0	0	12.44	19		GUT_GENOME001027	MGYG-HGUT-00189	Coprococcus sp900066115	ERS971652	ERP012929	Israel	Asia	ftp://ftp.ebi.ac.uk/pub/databases/metagenomics/mgnify_genomes/human-gut/v1.0/all_genomes/MGYG-HGUT-001/MGYG-HGUT-00189/genomes1/GUT_GENOME266536.gff.gz		4
GUT_GENOME266548	ZeeviD_2015__PNP_Main_150__bin.25	CIBIO	MAG	2351993	26	165305	41.88	99.33	0		0	0	0	17		GUT_GENOME140272	MGYG-HGUT-02289	Coprococcus sp000433075	ERS971788	ERP012929	Israel	Asia	ftp://ftp.ebi.ac.uk/pub/databases/metagenomics/mgnify_genomes/human-gut/v1.0/all_genomes/MGYG-HGUT-022/MGYG-HGUT-02289/genomes1/GUT_GENOME266548.gff.gz		8
GUT_GENOME266597	ZeeviD_2015__PNP_Main_152__bin.35	CIBIO	MAG	2354602	32	98389	42.07	99.33	0		0	0	10.8	16		GUT_GENOME140272	MGYG-HGUT-02289	Coprococcus sp000433075	ERS971790	ERP012929	Israel	Asia	ftp://ftp.ebi.ac.uk/pub/databases/metagenomics/mgnify_genomes/human-gut/v1.0/all_genomes/MGYG-HGUT-022/MGYG-HGUT-02289/genomes1/GUT_GENOME266597.gff.gz		8
GUT_GENOME266759	ZeeviD_2015__PNP_Main_158__bin.71	CIBIO	MAG	2863181	26	208974	42.94	99.33	0		0	0	0	18		GUT_GENOME000055	MGYG-HGUT-00018	Coprococcus eutactus	ERS971796	ERP012929	Israel	Asia	ftp://ftp.ebi.ac.uk/pub/databases/metagenomics/mgnify_genomes/human-gut/v1.0/all_genomes/MGYG-HGUT-000/MGYG-HGUT-00018/genomes1/GUT_GENOME266759.gff.gz		1
GUT_GENOME266782	ZeeviD_2015__PNP_Main_15__bin.33	CIBIO	MAG	2891762	50	86542	42.9	99.33	0.67		0	36.66	0	18		GUT_GENOME000055	MGYG-HGUT-00018	Coprococcus eutactus	ERS971653	ERP012929	Israel	Asia	ftp://ftp.ebi.ac.uk/pub/databases/metagenomics/mgnify_genomes/human-gut/v1.0/all_genomes/MGYG-HGUT-000/MGYG-HGUT-00018/genomes1/GUT_GENOME266782.gff.gz		1
GUT_GENOME266883	ZeeviD_2015__PNP_Main_163__bin.60	CIBIO	MAG	2641990	88	46906	44.33	98.32	0		0	0	0	16		GUT_GENOME001379	MGYG-HGUT-00231	Coprococcus eutactus_A	ERS971801	ERP012929	Israel	Asia	ftp://ftp.ebi.ac.uk/pub/databases/metagenomics/mgnify_genomes/human-gut/v1.0/all_genomes/MGYG-HGUT-002/MGYG-HGUT-00231/genomes2/GUT_GENOME266883.gff.gz		2
GUT_GENOME266899	ZeeviD_2015__PNP_Main_165__bin.17	CIBIO	MAG	2383025	26	178916	41.94	99.33	0		0	0	11.45	16		GUT_GENOME140272	MGYG-HGUT-02289	Coprococcus sp000433075	ERS971803	ERP012929	Israel	Asia	ftp://ftp.ebi.ac.uk/pub/databases/metagenomics/mgnify_genomes/human-gut/v1.0/all_genomes/MGYG-HGUT-022/MGYG-HGUT-02289/genomes1/GUT_GENOME266899.gff.gz		8
GUT_GENOME267088	ZeeviD_2015__PNP_Main_172__bin.34	CIBIO	MAG	2389244	29	131098	41.88	99.33	0		0	25.24	0	16		GUT_GENOME140272	MGYG-HGUT-02289	Coprococcus sp000433075	ERS971810	ERP012929	Israel	Asia	ftp://ftp.ebi.ac.uk/pub/databases/metagenomics/mgnify_genomes/human-gut/v1.0/all_genomes/MGYG-HGUT-022/MGYG-HGUT-02289/genomes1/GUT_GENOME267088.gff.gz		8
GUT_GENOME267236	ZeeviD_2015__PNP_Main_178__bin.46	CIBIO	MAG	2569639	27	137345	41.37	95.3	0		0	0	16.44	19		GUT_GENOME001027	MGYG-HGUT-00189	Coprococcus sp900066115	ERS971816	ERP012929	Israel	Asia	ftp://ftp.ebi.ac.uk/pub/databases/metagenomics/mgnify_genomes/human-gut/v1.0/all_genomes/MGYG-HGUT-001/MGYG-HGUT-00189/genomes1/GUT_GENOME267236.gff.gz		4
GUT_GENOME267426	ZeeviD_2015__PNP_Main_185__bin.25	CIBIO	MAG	2554204	82	49155	41.13	98.66	0.67		0	27.27	0	18		GUT_GENOME001027	MGYG-HGUT-00189	Coprococcus sp000154245	ERS971823	ERP012929	Israel	Asia	ftp://ftp.ebi.ac.uk/pub/databases/metagenomics/mgnify_genomes/human-gut/v1.0/all_genomes/MGYG-HGUT-001/MGYG-HGUT-00189/genomes2/GUT_GENOME267426.gff.gz		5
GUT_GENOME267499	ZeeviD_2015__PNP_Main_189__bin.17	CIBIO	MAG	2840732	22	217034	44.04	95.97	0		0	0	5.64	19		GUT_GENOME001379	MGYG-HGUT-00231	Coprococcus eutactus_A	ERS971827	ERP012929	Israel	Asia	ftp://ftp.ebi.ac.uk/pub/databases/metagenomics/mgnify_genomes/human-gut/v1.0/all_genomes/MGYG-HGUT-002/MGYG-HGUT-00231/genomes1/GUT_GENOME267499.gff.gz		2
GUT_GENOME267551	ZeeviD_2015__PNP_Main_190__bin.37	CIBIO	MAG	2620223	21	309759	41.3	99.33	0		0	27.27	11.52	17		GUT_GENOME001027	MGYG-HGUT-00189	Coprococcus sp900066115	ERS971828	ERP012929	Israel	Asia	ftp://ftp.ebi.ac.uk/pub/databases/metagenomics/mgnify_genomes/human-gut/v1.0/all_genomes/MGYG-HGUT-001/MGYG-HGUT-00189/genomes2/GUT_GENOME267551.gff.gz		4
GUT_GENOME267702	ZeeviD_2015__PNP_Main_198__bin.33	CIBIO	MAG	2911220	31	160037	43.97	99.33	0		0	0	0	18		GUT_GENOME001379	MGYG-HGUT-00231	Coprococcus eutactus_A	ERS971836	ERP012929	Israel	Asia	ftp://ftp.ebi.ac.uk/pub/databases/metagenomics/mgnify_genomes/human-gut/v1.0/all_genomes/MGYG-HGUT-002/MGYG-HGUT-00231/genomes1/GUT_GENOME267702.gff.gz		2
GUT_GENOME267836	ZeeviD_2015__PNP_Main_202__bin.38	CIBIO	MAG	2796062	33	161648	40.81	96.64	0		0	0	10.7	19		GUT_GENOME001027	MGYG-HGUT-00189	Coprococcus sp900066115	ERS971840	ERP012929	Israel	Asia	ftp://ftp.ebi.ac.uk/pub/databases/metagenomics/mgnify_genomes/human-gut/v1.0/all_genomes/MGYG-HGUT-001/MGYG-HGUT-00189/genomes1/GUT_GENOME267836.gff.gz		4
GUT_GENOME267876	ZeeviD_2015__PNP_Main_204__bin.47	CIBIO	MAG	2977234	26	233575	42.64	98.66	0.31		0	0	0	16		GUT_GENOME000055	MGYG-HGUT-00018	Coprococcus eutactus	ERS971842	ERP012929	Israel	Asia	ftp://ftp.ebi.ac.uk/pub/databases/metagenomics/mgnify_genomes/human-gut/v1.0/all_genomes/MGYG-HGUT-000/MGYG-HGUT-00018/genomes1/GUT_GENOME267876.gff.gz		1
GUT_GENOME267929	ZeeviD_2015__PNP_Main_207__bin.8	CIBIO	MAG	2828341	29	174534	44.15	99.33	0.67		0	0	0	19		GUT_GENOME001379	MGYG-HGUT-00231	Coprococcus eutactus_A	ERS971845	ERP012929	Israel	Asia	ftp://ftp.ebi.ac.uk/pub/databases/metagenomics/mgnify_genomes/human-gut/v1.0/all_genomes/MGYG-HGUT-002/MGYG-HGUT-00231/genomes1/GUT_GENOME267929.gff.gz		2
GUT_GENOME267950	ZeeviD_2015__PNP_Main_208__bin.35	CIBIO	MAG	2648904	117	37017	44.35	97.09	0.67		0	0	11.52	17		GUT_GENOME001379	MGYG-HGUT-00231	Coprococcus eutactus_A	ERS971846	ERP012929	Israel	Asia	ftp://ftp.ebi.ac.uk/pub/databases/metagenomics/mgnify_genomes/human-gut/v1.0/all_genomes/MGYG-HGUT-002/MGYG-HGUT-00231/genomes3/GUT_GENOME267950.gff.gz		2
GUT_GENOME267956	ZeeviD_2015__PNP_Main_208__bin.46	CIBIO	MAG	2343941	36	87414	41.95	99.33	0		0	0	0	17		GUT_GENOME140272	MGYG-HGUT-02289	Coprococcus sp000433075	ERS971846	ERP012929	Israel	Asia	ftp://ftp.ebi.ac.uk/pub/databases/metagenomics/mgnify_genomes/human-gut/v1.0/all_genomes/MGYG-HGUT-022/MGYG-HGUT-02289/genomes1/GUT_GENOME267956.gff.gz		8
GUT_GENOME268191	ZeeviD_2015__PNP_Main_216__bin.37	CIBIO	MAG	3003390	29	164605	42.74	99.33	0		0	24.07	11.45	17		GUT_GENOME105828	MGYG-HGUT-01745	Coprococcus sp.	ERS971854	ERP012929	Israel	Asia	ftp://ftp.ebi.ac.uk/pub/databases/metagenomics/mgnify_genomes/human-gut/v1.0/all_genomes/MGYG-HGUT-017/MGYG-HGUT-01745/genomes1/GUT_GENOME268191.gff.gz		7
GUT_GENOME268386	ZeeviD_2015__PNP_Main_223__bin.37	CIBIO	MAG	2742954	28	128044	44.28	98.66	0		0	0	11.45	17		GUT_GENOME001379	MGYG-HGUT-00231	Coprococcus eutactus_A	ERS971861	ERP012929	Israel	Asia	ftp://ftp.ebi.ac.uk/pub/databases/metagenomics/mgnify_genomes/human-gut/v1.0/all_genomes/MGYG-HGUT-002/MGYG-HGUT-00231/genomes3/GUT_GENOME268386.gff.gz		2
GUT_GENOME268418	ZeeviD_2015__PNP_Main_224__bin.20	CIBIO	MAG	2860218	30	145405	44.27	98.66	0		0	0	0	18		GUT_GENOME001379	MGYG-HGUT-00231	Coprococcus eutactus_A	ERS971862	ERP012929	Israel	Asia	ftp://ftp.ebi.ac.uk/pub/databases/metagenomics/mgnify_genomes/human-gut/v1.0/all_genomes/MGYG-HGUT-002/MGYG-HGUT-00231/genomes3/GUT_GENOME268418.gff.gz		2
GUT_GENOME268538	ZeeviD_2015__PNP_Main_229__bin.27	CIBIO	MAG	2710845	116	35242	44.38	98.43	0.67		0	0	5.64	17		GUT_GENOME001379	MGYG-HGUT-00231	Coprococcus eutactus_A	ERS971867	ERP012929	Israel	Asia	ftp://ftp.ebi.ac.uk/pub/databases/metagenomics/mgnify_genomes/human-gut/v1.0/all_genomes/MGYG-HGUT-002/MGYG-HGUT-00231/genomes1/GUT_GENOME268538.gff.gz		2
GUT_GENOME268571	ZeeviD_2015__PNP_Main_22__bin.32	CIBIO	MAG	2726356	24	164776	44.22	99.33	0		0	0	0	18		GUT_GENOME001379	MGYG-HGUT-00231	Coprococcus eutactus_A	ERS971660	ERP012929	Israel	Asia	ftp://ftp.ebi.ac.uk/pub/databases/metagenomics/mgnify_genomes/human-gut/v1.0/all_genomes/MGYG-HGUT-002/MGYG-HGUT-00231/genomes2/GUT_GENOME268571.gff.gz		2
GUT_GENOME268588	ZeeviD_2015__PNP_Main_230__bin.12	CIBIO	MAG	2794513	29	135373	44.1	99.33	0		0	0	5.64	19		GUT_GENOME001379	MGYG-HGUT-00231	Coprococcus eutactus_A	ERS971868	ERP012929	Israel	Asia	ftp://ftp.ebi.ac.uk/pub/databases/metagenomics/mgnify_genomes/human-gut/v1.0/all_genomes/MGYG-HGUT-002/MGYG-HGUT-00231/genomes2/GUT_GENOME268588.gff.gz		2
GUT_GENOME268614	ZeeviD_2015__PNP_Main_231__bin.24	CIBIO	MAG	2728040	136	30296	44.39	96.98	0.67		0	0	0	17		GUT_GENOME001379	MGYG-HGUT-00231	Coprococcus eutactus_A	ERS971869	ERP012929	Israel	Asia	ftp://ftp.ebi.ac.uk/pub/databases/metagenomics/mgnify_genomes/human-gut/v1.0/all_genomes/MGYG-HGUT-002/MGYG-HGUT-00231/genomes2/GUT_GENOME268614.gff.gz		2
GUT_GENOME268646	ZeeviD_2015__PNP_Main_232__bin.5	CIBIO	MAG	2787953	59	66910	44.19	99.33	0		0	0	6.09	16		GUT_GENOME001379	MGYG-HGUT-00231	Coprococcus eutactus_A	ERS971870	ERP012929	Israel	Asia	ftp://ftp.ebi.ac.uk/pub/databases/metagenomics/mgnify_genomes/human-gut/v1.0/all_genomes/MGYG-HGUT-002/MGYG-HGUT-00231/genomes3/GUT_GENOME268646.gff.gz		2
GUT_GENOME268670	ZeeviD_2015__PNP_Main_233__bin.7	CIBIO	MAG	2532114	62	72474	41.06	96.64	0.67		0	11.94	0	14		GUT_GENOME001027	MGYG-HGUT-00189	Coprococcus sp000154245	ERS971871	ERP012929	Israel	Asia	ftp://ftp.ebi.ac.uk/pub/databases/metagenomics/mgnify_genomes/human-gut/v1.0/all_genomes/MGYG-HGUT-001/MGYG-HGUT-00189/genomes1/GUT_GENOME268670.gff.gz		5
GUT_GENOME268774	ZeeviD_2015__PNP_Main_239__bin.42	CIBIO	MAG	2510787	35	93940	41.19	97.32	0		0	35.29	0	17		GUT_GENOME001027	MGYG-HGUT-00189	Coprococcus sp000154245	ERS971877	ERP012929	Israel	Asia	ftp://ftp.ebi.ac.uk/pub/databases/metagenomics/mgnify_genomes/human-gut/v1.0/all_genomes/MGYG-HGUT-001/MGYG-HGUT-00189/genomes1/GUT_GENOME268774.gff.gz		5
GUT_GENOME268800	ZeeviD_2015__PNP_Main_23__bin.40	CIBIO	MAG	2616565	147	28553	44.3	96.76	0.34		0	0	0	18		GUT_GENOME001379	MGYG-HGUT-00231	Coprococcus eutactus_A	ERS971661	ERP012929	Israel	Asia	ftp://ftp.ebi.ac.uk/pub/databases/metagenomics/mgnify_genomes/human-gut/v1.0/all_genomes/MGYG-HGUT-002/MGYG-HGUT-00231/genomes2/GUT_GENOME268800.gff.gz		2
GUT_GENOME268857	ZeeviD_2015__PNP_Main_241__bin.35	CIBIO	MAG	2838121	28	167110	44.26	97.99	0		0	0	5.64	19		GUT_GENOME001379	MGYG-HGUT-00231	Coprococcus eutactus_A	ERS971879	ERP012929	Israel	Asia	ftp://ftp.ebi.ac.uk/pub/databases/metagenomics/mgnify_genomes/human-gut/v1.0/all_genomes/MGYG-HGUT-002/MGYG-HGUT-00231/genomes3/GUT_GENOME268857.gff.gz		2
GUT_GENOME269037	ZeeviD_2015__PNP_Main_249__bin.21	CIBIO	MAG	2893494	24	206341	43	99.33	0		0	0	5.61	17		GUT_GENOME000055	MGYG-HGUT-00018	Coprococcus eutactus	ERS971887	ERP012929	Israel	Asia	ftp://ftp.ebi.ac.uk/pub/databases/metagenomics/mgnify_genomes/human-gut/v1.0/all_genomes/MGYG-HGUT-000/MGYG-HGUT-00018/genomes1/GUT_GENOME269037.gff.gz		1
GUT_GENOME269046	ZeeviD_2015__PNP_Main_24__bin.1	CIBIO	MAG	2947332	25	219499	43.98	97.85	0		0	25.38	5.64	19		GUT_GENOME001379	MGYG-HGUT-00231	Coprococcus eutactus_A	ERS971662	ERP012929	Israel	Asia	ftp://ftp.ebi.ac.uk/pub/databases/metagenomics/mgnify_genomes/human-gut/v1.0/all_genomes/MGYG-HGUT-002/MGYG-HGUT-00231/genomes3/GUT_GENOME269046.gff.gz		2
GUT_GENOME269050	ZeeviD_2015__PNP_Main_24__bin.2	CIBIO	MAG	2555190	22	207282	41.53	99.33	0		0	0	11.45	19		GUT_GENOME001027	MGYG-HGUT-00189	Coprococcus sp900066115	ERS971662	ERP012929	Israel	Asia	ftp://ftp.ebi.ac.uk/pub/databases/metagenomics/mgnify_genomes/human-gut/v1.0/all_genomes/MGYG-HGUT-001/MGYG-HGUT-00189/genomes1/GUT_GENOME269050.gff.gz		4
GUT_GENOME269124	ZeeviD_2015__PNP_Main_252__bin.43	CIBIO	MAG	2578785	18	221564	41.52	97.99	0		0	0	12.44	19		GUT_GENOME001027	MGYG-HGUT-00189	Coprococcus sp900066115	ERS971890	ERP012929	Israel	Asia	ftp://ftp.ebi.ac.uk/pub/databases/metagenomics/mgnify_genomes/human-gut/v1.0/all_genomes/MGYG-HGUT-001/MGYG-HGUT-00189/genomes1/GUT_GENOME269124.gff.gz		4
GUT_GENOME269150	ZeeviD_2015__PNP_Main_253__bin.3	CIBIO	MAG	2855958	30	242631	43.14	99.33	0		0	23.61	0	19		GUT_GENOME000055	MGYG-HGUT-00018	Coprococcus eutactus	ERS971891	ERP012929	Israel	Asia	ftp://ftp.ebi.ac.uk/pub/databases/metagenomics/mgnify_genomes/human-gut/v1.0/all_genomes/MGYG-HGUT-000/MGYG-HGUT-00018/genomes1/GUT_GENOME269150.gff.gz		1
GUT_GENOME269449	ZeeviD_2015__PNP_Main_266__bin.35	CIBIO	MAG	3156016	25	182410	43.38	99.33	0.22		0	0	0	18		GUT_GENOME001379	MGYG-HGUT-00231	Coprococcus eutactus_A	ERS971904	ERP012929	Israel	Asia	ftp://ftp.ebi.ac.uk/pub/databases/metagenomics/mgnify_genomes/human-gut/v1.0/all_genomes/MGYG-HGUT-002/MGYG-HGUT-00231/genomes2/GUT_GENOME269449.gff.gz		2
GUT_GENOME269460	ZeeviD_2015__PNP_Main_267__bin.1	CIBIO	MAG	2565504	41	79759	41.36	98.66	0		0	0	0	17		GUT_GENOME001027	MGYG-HGUT-00189	Coprococcus sp900066115	ERS971905	ERP012929	Israel	Asia	ftp://ftp.ebi.ac.uk/pub/databases/metagenomics/mgnify_genomes/human-gut/v1.0/all_genomes/MGYG-HGUT-001/MGYG-HGUT-00189/genomes1/GUT_GENOME269460.gff.gz		4
GUT_GENOME269489	ZeeviD_2015__PNP_Main_268__bin.38	CIBIO	MAG	2873710	32	181461	44.14	99.33	0		0	0	10.84	18		GUT_GENOME001379	MGYG-HGUT-00231	Coprococcus eutactus_A	ERS971906	ERP012929	Israel	Asia	ftp://ftp.ebi.ac.uk/pub/databases/metagenomics/mgnify_genomes/human-gut/v1.0/all_genomes/MGYG-HGUT-002/MGYG-HGUT-00231/genomes2/GUT_GENOME269489.gff.gz		2
GUT_GENOME269593	ZeeviD_2015__PNP_Main_272__bin.36	CIBIO	MAG	2851055	25	176184	43.14	99.33	0		0	0	0	19		GUT_GENOME000055	MGYG-HGUT-00018	Coprococcus eutactus	ERS971910	ERP012929	Israel	Asia	ftp://ftp.ebi.ac.uk/pub/databases/metagenomics/mgnify_genomes/human-gut/v1.0/all_genomes/MGYG-HGUT-000/MGYG-HGUT-00018/genomes1/GUT_GENOME269593.gff.gz		1
GUT_GENOME269679	ZeeviD_2015__PNP_Main_278__bin.31	CIBIO	MAG	2609819	25	148538	41.35	99.33	0		0	0	11.52	18		GUT_GENOME001027	MGYG-HGUT-00189	Coprococcus sp000154245	ERS971916	ERP012929	Israel	Asia	ftp://ftp.ebi.ac.uk/pub/databases/metagenomics/mgnify_genomes/human-gut/v1.0/all_genomes/MGYG-HGUT-001/MGYG-HGUT-00189/genomes1/GUT_GENOME269679.gff.gz		5
GUT_GENOME270009	ZeeviD_2015__PNP_Main_291__bin.5	CIBIO	MAG	2641153	27	160159	41.29	99.33	0		0	0	11.45	19		GUT_GENOME001027	MGYG-HGUT-00189	Coprococcus sp900066115	ERS971929	ERP012929	Israel	Asia	ftp://ftp.ebi.ac.uk/pub/databases/metagenomics/mgnify_genomes/human-gut/v1.0/all_genomes/MGYG-HGUT-001/MGYG-HGUT-00189/genomes1/GUT_GENOME270009.gff.gz		4
GUT_GENOME270040	ZeeviD_2015__PNP_Main_293__bin.27	CIBIO	MAG	2869350	33	189368	44.06	99.33	0.67		0	22.57	16.48	19		GUT_GENOME001379	MGYG-HGUT-00231	Coprococcus eutactus_A	ERS971931	ERP012929	Israel	Asia	ftp://ftp.ebi.ac.uk/pub/databases/metagenomics/mgnify_genomes/human-gut/v1.0/all_genomes/MGYG-HGUT-002/MGYG-HGUT-00231/genomes2/GUT_GENOME270040.gff.gz		2
GUT_GENOME270072	ZeeviD_2015__PNP_Main_294__bin.37	CIBIO	MAG	2686126	41	135459	41.56	99.33	0		0	0	0	17		GUT_GENOME001027	MGYG-HGUT-00189	Coprococcus sp900066115	ERS971932	ERP012929	Israel	Asia	ftp://ftp.ebi.ac.uk/pub/databases/metagenomics/mgnify_genomes/human-gut/v1.0/all_genomes/MGYG-HGUT-001/MGYG-HGUT-00189/genomes1/GUT_GENOME270072.gff.gz		4
GUT_GENOME270163	ZeeviD_2015__PNP_Main_297__bin.41	CIBIO	MAG	2852368	31	138311	44.06	99.33	0		0	0	7.08	19		GUT_GENOME001379	MGYG-HGUT-00231	Coprococcus eutactus_A	ERS971935	ERP012929	Israel	Asia	ftp://ftp.ebi.ac.uk/pub/databases/metagenomics/mgnify_genomes/human-gut/v1.0/all_genomes/MGYG-HGUT-002/MGYG-HGUT-00231/genomes2/GUT_GENOME270163.gff.gz		2
GUT_GENOME270198	ZeeviD_2015__PNP_Main_299__bin.27	CIBIO	MAG	2412863	26	153983	41.93	99.33	0		0	24.85	0	17		GUT_GENOME140272	MGYG-HGUT-02289	Coprococcus sp000433075	ERS971937	ERP012929	Israel	Asia	ftp://ftp.ebi.ac.uk/pub/databases/metagenomics/mgnify_genomes/human-gut/v1.0/all_genomes/MGYG-HGUT-022/MGYG-HGUT-02289/genomes1/GUT_GENOME270198.gff.gz		8
GUT_GENOME270308	ZeeviD_2015__PNP_Main_301__bin.31	CIBIO	MAG	2230809	129	26260	42.05	98.19	0.69		0	0	0	15		GUT_GENOME140272	MGYG-HGUT-02289	Coprococcus sp000433075	ERS971939	ERP012929	Israel	Asia	ftp://ftp.ebi.ac.uk/pub/databases/metagenomics/mgnify_genomes/human-gut/v1.0/all_genomes/MGYG-HGUT-022/MGYG-HGUT-02289/genomes1/GUT_GENOME270308.gff.gz		8
GUT_GENOME270329	ZeeviD_2015__PNP_Main_303__bin.14	CIBIO	MAG	2832121	32	123460	44.06	99.33	0.11		0	0	5.64	17		GUT_GENOME001379	MGYG-HGUT-00231	Coprococcus eutactus_A	ERS971941	ERP012929	Israel	Asia	ftp://ftp.ebi.ac.uk/pub/databases/metagenomics/mgnify_genomes/human-gut/v1.0/all_genomes/MGYG-HGUT-002/MGYG-HGUT-00231/genomes3/GUT_GENOME270329.gff.gz		2
GUT_GENOME270366	ZeeviD_2015__PNP_Main_305__bin.21	CIBIO	MAG	2514343	32	141373	41.19	99.33	0		0	0	0	16		GUT_GENOME001027	MGYG-HGUT-00189	Coprococcus sp000154245	ERS971943	ERP012929	Israel	Asia	ftp://ftp.ebi.ac.uk/pub/databases/metagenomics/mgnify_genomes/human-gut/v1.0/all_genomes/MGYG-HGUT-001/MGYG-HGUT-00189/genomes1/GUT_GENOME270366.gff.gz		5
GUT_GENOME270385	ZeeviD_2015__PNP_Main_306__bin.27	CIBIO	MAG	2822401	38	109699	44.17	99.33	0		0	0	5.64	17		GUT_GENOME001379	MGYG-HGUT-00231	Coprococcus eutactus_A	ERS971944	ERP012929	Israel	Asia	ftp://ftp.ebi.ac.uk/pub/databases/metagenomics/mgnify_genomes/human-gut/v1.0/all_genomes/MGYG-HGUT-002/MGYG-HGUT-00231/genomes3/GUT_GENOME270385.gff.gz		2
GUT_GENOME270400	ZeeviD_2015__PNP_Main_307__bin.17	CIBIO	MAG	2594471	48	88056	41.36	99.01	0.04		0	13.24	10.7	16		GUT_GENOME001027	MGYG-HGUT-00189	Coprococcus sp900066115	ERS971945	ERP012929	Israel	Asia	ftp://ftp.ebi.ac.uk/pub/databases/metagenomics/mgnify_genomes/human-gut/v1.0/all_genomes/MGYG-HGUT-001/MGYG-HGUT-00189/genomes2/GUT_GENOME270400.gff.gz		4
GUT_GENOME270469	ZeeviD_2015__PNP_Main_310__bin.38	CIBIO	MAG	2964348	25	172631	42.59	99.33	0		0	0	13.37	19		GUT_GENOME105828	MGYG-HGUT-01745	Coprococcus sp.	ERS971948	ERP012929	Israel	Asia	ftp://ftp.ebi.ac.uk/pub/databases/metagenomics/mgnify_genomes/human-gut/v1.0/all_genomes/MGYG-HGUT-017/MGYG-HGUT-01745/genomes1/GUT_GENOME270469.gff.gz		7
GUT_GENOME270483	ZeeviD_2015__PNP_Main_311__bin.24	CIBIO	MAG	2919748	42	141657	42.76	99.33	0		0	0	0	18		GUT_GENOME105828	MGYG-HGUT-01745	Coprococcus sp.	ERS971949	ERP012929	Israel	Asia	ftp://ftp.ebi.ac.uk/pub/databases/metagenomics/mgnify_genomes/human-gut/v1.0/all_genomes/MGYG-HGUT-017/MGYG-HGUT-01745/genomes1/GUT_GENOME270483.gff.gz		7
GUT_GENOME270519	ZeeviD_2015__PNP_Main_313__bin.34	CIBIO	MAG	2361910	49	77580	41.87	99.33	0		0	0	0	14		GUT_GENOME140272	MGYG-HGUT-02289	Coprococcus sp000433075	ERS971951	ERP012929	Israel	Asia	ftp://ftp.ebi.ac.uk/pub/databases/metagenomics/mgnify_genomes/human-gut/v1.0/all_genomes/MGYG-HGUT-022/MGYG-HGUT-02289/genomes1/GUT_GENOME270519.gff.gz		8
GUT_GENOME270947	ZeeviD_2015__PNP_Main_334__bin.25	CIBIO	MAG	2741307	117	39304	43.14	97.99	0.36		0	0	5.61	19		GUT_GENOME000055	MGYG-HGUT-00018	Coprococcus eutactus	ERS971972	ERP012929	Israel	Asia	ftp://ftp.ebi.ac.uk/pub/databases/metagenomics/mgnify_genomes/human-gut/v1.0/all_genomes/MGYG-HGUT-000/MGYG-HGUT-00018/genomes1/GUT_GENOME270947.gff.gz		1
GUT_GENOME270959	ZeeviD_2015__PNP_Main_335__bin.13	CIBIO	MAG	2761154	26	190055	44.08	97.99	0		0	0	5.64	19		GUT_GENOME001379	MGYG-HGUT-00231	Coprococcus eutactus_A	ERS971973	ERP012929	Israel	Asia	ftp://ftp.ebi.ac.uk/pub/databases/metagenomics/mgnify_genomes/human-gut/v1.0/all_genomes/MGYG-HGUT-002/MGYG-HGUT-00231/genomes1/GUT_GENOME270959.gff.gz		2
GUT_GENOME271038	ZeeviD_2015__PNP_Main_339__bin.36	CIBIO	MAG	2884331	34	207818	44.02	97.32	0		0	0	5.64	17		GUT_GENOME001379	MGYG-HGUT-00231	Coprococcus eutactus_A	ERS971977	ERP012929	Israel	Asia	ftp://ftp.ebi.ac.uk/pub/databases/metagenomics/mgnify_genomes/human-gut/v1.0/all_genomes/MGYG-HGUT-002/MGYG-HGUT-00231/genomes1/GUT_GENOME271038.gff.gz		2
GUT_GENOME271116	ZeeviD_2015__PNP_Main_341__bin.45	CIBIO	MAG	2836587	27	169436	44.19	99.33	0		0	0	6.09	18		GUT_GENOME001379	MGYG-HGUT-00231	Coprococcus eutactus_A	ERS971979	ERP012929	Israel	Asia	ftp://ftp.ebi.ac.uk/pub/databases/metagenomics/mgnify_genomes/human-gut/v1.0/all_genomes/MGYG-HGUT-002/MGYG-HGUT-00231/genomes2/GUT_GENOME271116.gff.gz		2
GUT_GENOME271173	ZeeviD_2015__PNP_Main_345__bin.41	CIBIO	MAG	2349807	46	73104	41.84	97.99	0		0	0	10.02	16		GUT_GENOME140272	MGYG-HGUT-02289	Coprococcus sp000433075	ERS971983	ERP012929	Israel	Asia	ftp://ftp.ebi.ac.uk/pub/databases/metagenomics/mgnify_genomes/human-gut/v1.0/all_genomes/MGYG-HGUT-022/MGYG-HGUT-02289/genomes1/GUT_GENOME271173.gff.gz		8
GUT_GENOME271232	ZeeviD_2015__PNP_Main_347__bin.7	CIBIO	MAG	2847587	24	231593	43	99.33	0		0	0	0	19		GUT_GENOME000055	MGYG-HGUT-00018	Coprococcus eutactus	ERS971985	ERP012929	Israel	Asia	ftp://ftp.ebi.ac.uk/pub/databases/metagenomics/mgnify_genomes/human-gut/v1.0/all_genomes/MGYG-HGUT-000/MGYG-HGUT-00018/genomes1/GUT_GENOME271232.gff.gz		1
GUT_GENOME271255	ZeeviD_2015__PNP_Main_349__bin.14	CIBIO	MAG	2679557	162	28668	44.41	97.76	0		0	0	5.64	18		GUT_GENOME001379	MGYG-HGUT-00231	Coprococcus eutactus_A	ERS971987	ERP012929	Israel	Asia	ftp://ftp.ebi.ac.uk/pub/databases/metagenomics/mgnify_genomes/human-gut/v1.0/all_genomes/MGYG-HGUT-002/MGYG-HGUT-00231/genomes2/GUT_GENOME271255.gff.gz		2
GUT_GENOME271271	ZeeviD_2015__PNP_Main_34__bin.13	CIBIO	MAG	2835495	59	96198	42.84	98.66	0.67		0	0	0	16		GUT_GENOME105828	MGYG-HGUT-01745	Coprococcus sp.	ERS971672	ERP012929	Israel	Asia	ftp://ftp.ebi.ac.uk/pub/databases/metagenomics/mgnify_genomes/human-gut/v1.0/all_genomes/MGYG-HGUT-017/MGYG-HGUT-01745/genomes1/GUT_GENOME271271.gff.gz		7
GUT_GENOME271319	ZeeviD_2015__PNP_Main_351__bin.30	CIBIO	MAG	2630776	120	36607	44.33	97.99	0		0	0	11.83	18		GUT_GENOME001379	MGYG-HGUT-00231	Coprococcus eutactus_A	ERS971989	ERP012929	Israel	Asia	ftp://ftp.ebi.ac.uk/pub/databases/metagenomics/mgnify_genomes/human-gut/v1.0/all_genomes/MGYG-HGUT-002/MGYG-HGUT-00231/genomes3/GUT_GENOME271319.gff.gz		2
GUT_GENOME271341	ZeeviD_2015__PNP_Main_352__bin.28	CIBIO	MAG	2706261	48	89453	44.33	98.66	0		0	0	6.09	19		GUT_GENOME001379	MGYG-HGUT-00231	Coprococcus eutactus_A	ERS971990	ERP012929	Israel	Asia	ftp://ftp.ebi.ac.uk/pub/databases/metagenomics/mgnify_genomes/human-gut/v1.0/all_genomes/MGYG-HGUT-002/MGYG-HGUT-00231/genomes3/GUT_GENOME271341.gff.gz		2
GUT_GENOME271479	ZeeviD_2015__PNP_Main_358__bin.7	CIBIO	MAG	2945209	42	112921	44.09	99.33	0		0	35.29	13.57	19		GUT_GENOME001379	MGYG-HGUT-00231	Coprococcus eutactus_A	ERS971996	ERP012929	Israel	Asia	ftp://ftp.ebi.ac.uk/pub/databases/metagenomics/mgnify_genomes/human-gut/v1.0/all_genomes/MGYG-HGUT-002/MGYG-HGUT-00231/genomes3/GUT_GENOME271479.gff.gz		2
GUT_GENOME271534	ZeeviD_2015__PNP_Main_360__bin.4	CIBIO	MAG	2601705	165	25350	44.29	96.49	0.17		0	0	0	16		GUT_GENOME001379	MGYG-HGUT-00231	Coprococcus eutactus_A	ERS971998	ERP012929	Israel	Asia	ftp://ftp.ebi.ac.uk/pub/databases/metagenomics/mgnify_genomes/human-gut/v1.0/all_genomes/MGYG-HGUT-002/MGYG-HGUT-00231/genomes1/GUT_GENOME271534.gff.gz		2
GUT_GENOME271550	ZeeviD_2015__PNP_Main_361__bin.52	CIBIO	MAG	2970963	29	184156	44.04	99.33	0		0	0	6.09	19		GUT_GENOME001379	MGYG-HGUT-00231	Coprococcus eutactus_A	ERS971999	ERP012929	Israel	Asia	ftp://ftp.ebi.ac.uk/pub/databases/metagenomics/mgnify_genomes/human-gut/v1.0/all_genomes/MGYG-HGUT-002/MGYG-HGUT-00231/genomes2/GUT_GENOME271550.gff.gz		2
GUT_GENOME271613	ZeeviD_2015__PNP_Main_365__bin.13	CIBIO	MAG	2861257	25	171003	44.14	99.33	0		0	0	0	19		GUT_GENOME001379	MGYG-HGUT-00231	Coprococcus eutactus_A	ERS972003	ERP012929	Israel	Asia	ftp://ftp.ebi.ac.uk/pub/databases/metagenomics/mgnify_genomes/human-gut/v1.0/all_genomes/MGYG-HGUT-002/MGYG-HGUT-00231/genomes3/GUT_GENOME271613.gff.gz		2
GUT_GENOME271655	ZeeviD_2015__PNP_Main_367__bin.22	CIBIO	MAG	2784070	27	138150	44.24	99.33	0		0	0	5.64	18		GUT_GENOME001379	MGYG-HGUT-00231	Coprococcus eutactus_A	ERS972005	ERP012929	Israel	Asia	ftp://ftp.ebi.ac.uk/pub/databases/metagenomics/mgnify_genomes/human-gut/v1.0/all_genomes/MGYG-HGUT-002/MGYG-HGUT-00231/genomes2/GUT_GENOME271655.gff.gz		2
GUT_GENOME271689	ZeeviD_2015__PNP_Main_369__bin.29	CIBIO	MAG	2548515	21	134831	41.47	97.99	0		0	25.38	16.44	17		GUT_GENOME001027	MGYG-HGUT-00189	Coprococcus sp900066115	ERS972007	ERP012929	Israel	Asia	ftp://ftp.ebi.ac.uk/pub/databases/metagenomics/mgnify_genomes/human-gut/v1.0/all_genomes/MGYG-HGUT-001/MGYG-HGUT-00189/genomes2/GUT_GENOME271689.gff.gz		4
GUT_GENOME271730	ZeeviD_2015__PNP_Main_370__bin.37	CIBIO	MAG	2608380	29	121138	41.32	99.33	0		0	61.97	11.45	19		GUT_GENOME001027	MGYG-HGUT-00189	Coprococcus sp900066115	ERS972008	ERP012929	Israel	Asia	ftp://ftp.ebi.ac.uk/pub/databases/metagenomics/mgnify_genomes/human-gut/v1.0/all_genomes/MGYG-HGUT-001/MGYG-HGUT-00189/genomes2/GUT_GENOME271730.gff.gz		4
GUT_GENOME271800	ZeeviD_2015__PNP_Main_373__bin.9	CIBIO	MAG	2981851	18	242055	43.78	99.33	0		0	0	16.72	17		GUT_GENOME001379	MGYG-HGUT-00231	Coprococcus eutactus_A	ERS972011	ERP012929	Israel	Asia	ftp://ftp.ebi.ac.uk/pub/databases/metagenomics/mgnify_genomes/human-gut/v1.0/all_genomes/MGYG-HGUT-002/MGYG-HGUT-00231/genomes2/GUT_GENOME271800.gff.gz		2
GUT_GENOME271842	ZeeviD_2015__PNP_Main_376__bin.33	CIBIO	MAG	2594567	47	77947	41.16	98.66	0		0	0	0	17		GUT_GENOME001027	MGYG-HGUT-00189	Coprococcus sp000154245	ERS972014	ERP012929	Israel	Asia	ftp://ftp.ebi.ac.uk/pub/databases/metagenomics/mgnify_genomes/human-gut/v1.0/all_genomes/MGYG-HGUT-001/MGYG-HGUT-00189/genomes2/GUT_GENOME271842.gff.gz		5
GUT_GENOME271876	ZeeviD_2015__PNP_Main_378__bin.38	CIBIO	MAG	2572193	27	233503	41.21	99.33	0		0	0	0	19		GUT_GENOME001027	MGYG-HGUT-00189	Coprococcus sp900066115	ERS972016	ERP012929	Israel	Asia	ftp://ftp.ebi.ac.uk/pub/databases/metagenomics/mgnify_genomes/human-gut/v1.0/all_genomes/MGYG-HGUT-001/MGYG-HGUT-00189/genomes2/GUT_GENOME271876.gff.gz		4
GUT_GENOME271895	ZeeviD_2015__PNP_Main_379__bin.3	CIBIO	MAG	2609857	40	110670	40.92	99.33	0		0	25.51	0	18		GUT_GENOME001027	MGYG-HGUT-00189	Coprococcus sp000154245	ERS972017	ERP012929	Israel	Asia	ftp://ftp.ebi.ac.uk/pub/databases/metagenomics/mgnify_genomes/human-gut/v1.0/all_genomes/MGYG-HGUT-001/MGYG-HGUT-00189/genomes2/GUT_GENOME271895.gff.gz		5
GUT_GENOME271902	ZeeviD_2015__PNP_Main_37__bin.11	CIBIO	MAG	2651770	74	61079	41.37	99.33	0.02		0	0	0	16		GUT_GENOME001027	MGYG-HGUT-00189	Coprococcus sp900066115	ERS971675	ERP012929	Israel	Asia	ftp://ftp.ebi.ac.uk/pub/databases/metagenomics/mgnify_genomes/human-gut/v1.0/all_genomes/MGYG-HGUT-001/MGYG-HGUT-00189/genomes1/GUT_GENOME271902.gff.gz		4
GUT_GENOME271933	ZeeviD_2015__PNP_Main_380__bin.45	CIBIO	MAG	2575854	32	118817	41.38	99.33	0		0	0	16.41	19		GUT_GENOME001027	MGYG-HGUT-00189	Coprococcus sp900066115	ERS972018	ERP012929	Israel	Asia	ftp://ftp.ebi.ac.uk/pub/databases/metagenomics/mgnify_genomes/human-gut/v1.0/all_genomes/MGYG-HGUT-001/MGYG-HGUT-00189/genomes1/GUT_GENOME271933.gff.gz		4
GUT_GENOME271979	ZeeviD_2015__PNP_Main_382__bin.49	CIBIO	MAG	3075719	30	205817	43.39	98.66	0.22		0	0	0	19		GUT_GENOME001379	MGYG-HGUT-00231	Coprococcus eutactus_A	ERS972020	ERP012929	Israel	Asia	ftp://ftp.ebi.ac.uk/pub/databases/metagenomics/mgnify_genomes/human-gut/v1.0/all_genomes/MGYG-HGUT-002/MGYG-HGUT-00231/genomes1/GUT_GENOME271979.gff.gz		2
GUT_GENOME272085	ZeeviD_2015__PNP_Main_388__bin.20	CIBIO	MAG	2581333	29	203934	41.42	98.66	0.34		0	0	11.52	18		GUT_GENOME001027	MGYG-HGUT-00189	Coprococcus sp900066115	ERS972026	ERP012929	Israel	Asia	ftp://ftp.ebi.ac.uk/pub/databases/metagenomics/mgnify_genomes/human-gut/v1.0/all_genomes/MGYG-HGUT-001/MGYG-HGUT-00189/genomes1/GUT_GENOME272085.gff.gz		4
GUT_GENOME272151	ZeeviD_2015__PNP_Main_38__bin.55	CIBIO	MAG	2402595	31	93815	42.02	99.33	0		0	0	0	17		GUT_GENOME140272	MGYG-HGUT-02289	Coprococcus sp000433075	ERS971676	ERP012929	Israel	Asia	ftp://ftp.ebi.ac.uk/pub/databases/metagenomics/mgnify_genomes/human-gut/v1.0/all_genomes/MGYG-HGUT-022/MGYG-HGUT-02289/genomes1/GUT_GENOME272151.gff.gz		8
GUT_GENOME272179	ZeeviD_2015__PNP_Main_391__bin.18	CIBIO	MAG	2903879	92	54106	42.78	99.19	0.34		0	0	11.49	17		GUT_GENOME105828	MGYG-HGUT-01745	Coprococcus sp.	ERS972029	ERP012929	Israel	Asia	ftp://ftp.ebi.ac.uk/pub/databases/metagenomics/mgnify_genomes/human-gut/v1.0/all_genomes/MGYG-HGUT-017/MGYG-HGUT-01745/genomes1/GUT_GENOME272179.gff.gz		7
GUT_GENOME272201	ZeeviD_2015__PNP_Main_392__bin.36	CIBIO	MAG	2832630	28	194229	43.01	99.33	0		0	23.61	16.48	19		GUT_GENOME000055	MGYG-HGUT-00018	Coprococcus eutactus	ERS972030	ERP012929	Israel	Asia	ftp://ftp.ebi.ac.uk/pub/databases/metagenomics/mgnify_genomes/human-gut/v1.0/all_genomes/MGYG-HGUT-000/MGYG-HGUT-00018/genomes1/GUT_GENOME272201.gff.gz		1
GUT_GENOME272251	ZeeviD_2015__PNP_Main_394__bin.33	CIBIO	MAG	2963400	27	158644	44.01	99.33	0		0	0	5.64	18		GUT_GENOME001379	MGYG-HGUT-00231	Coprococcus eutactus_A	ERS972032	ERP012929	Israel	Asia	ftp://ftp.ebi.ac.uk/pub/databases/metagenomics/mgnify_genomes/human-gut/v1.0/all_genomes/MGYG-HGUT-002/MGYG-HGUT-00231/genomes1/GUT_GENOME272251.gff.gz		2
GUT_GENOME272525	ZeeviD_2015__PNP_Main_405__bin.21	CIBIO	MAG	2575782	33	125833	41.24	97.67	0.22		0	0	0	18		GUT_GENOME001027	MGYG-HGUT-00189	Coprococcus sp000154245	ERS972043	ERP012929	Israel	Asia	ftp://ftp.ebi.ac.uk/pub/databases/metagenomics/mgnify_genomes/human-gut/v1.0/all_genomes/MGYG-HGUT-001/MGYG-HGUT-00189/genomes2/GUT_GENOME272525.gff.gz		5
GUT_GENOME272685	ZeeviD_2015__PNP_Main_412__bin.71	CIBIO	MAG	2640455	26	191192	41.25	98.66	0		0	0	10.7	18		GUT_GENOME001027	MGYG-HGUT-00189	Coprococcus sp900066115	ERS972050	ERP012929	Israel	Asia	ftp://ftp.ebi.ac.uk/pub/databases/metagenomics/mgnify_genomes/human-gut/v1.0/all_genomes/MGYG-HGUT-001/MGYG-HGUT-00189/genomes1/GUT_GENOME272685.gff.gz		4
GUT_GENOME272770	ZeeviD_2015__PNP_Main_415__bin.40	CIBIO	MAG	2386048	26	145040	41.82	99.33	0		0	0	0	19		GUT_GENOME140272	MGYG-HGUT-02289	Coprococcus sp000433075	ERS972053	ERP012929	Israel	Asia	ftp://ftp.ebi.ac.uk/pub/databases/metagenomics/mgnify_genomes/human-gut/v1.0/all_genomes/MGYG-HGUT-022/MGYG-HGUT-02289/genomes1/GUT_GENOME272770.gff.gz		8
GUT_GENOME272840	ZeeviD_2015__PNP_Main_418__bin.43	CIBIO	MAG	2887749	26	135218	44.12	97.32	0		0	0	6.09	19		GUT_GENOME001379	MGYG-HGUT-00231	Coprococcus eutactus_A	ERS972056	ERP012929	Israel	Asia	ftp://ftp.ebi.ac.uk/pub/databases/metagenomics/mgnify_genomes/human-gut/v1.0/all_genomes/MGYG-HGUT-002/MGYG-HGUT-00231/genomes1/GUT_GENOME272840.gff.gz		2
GUT_GENOME272875	ZeeviD_2015__PNP_Main_41__bin.27	CIBIO	MAG	2908642	28	164631	44.04	97.32	0		0	23.61	5.64	18		GUT_GENOME001379	MGYG-HGUT-00231	Coprococcus eutactus_A	ERS971679	ERP012929	Israel	Asia	ftp://ftp.ebi.ac.uk/pub/databases/metagenomics/mgnify_genomes/human-gut/v1.0/all_genomes/MGYG-HGUT-002/MGYG-HGUT-00231/genomes2/GUT_GENOME272875.gff.gz		2
GUT_GENOME272903	ZeeviD_2015__PNP_Main_420__bin.9	CIBIO	MAG	2888410	22	154666	44	97.32	0		0	0	0	18		GUT_GENOME001379	MGYG-HGUT-00231	Coprococcus eutactus_A	ERS972058	ERP012929	Israel	Asia	ftp://ftp.ebi.ac.uk/pub/databases/metagenomics/mgnify_genomes/human-gut/v1.0/all_genomes/MGYG-HGUT-002/MGYG-HGUT-00231/genomes2/GUT_GENOME272903.gff.gz		2
GUT_GENOME272934	ZeeviD_2015__PNP_Main_422__bin.20	CIBIO	MAG	2719885	33	182745	44.17	99.33	0		0	0	5.64	19		GUT_GENOME001379	MGYG-HGUT-00231	Coprococcus eutactus_A	ERS972060	ERP012929	Israel	Asia	ftp://ftp.ebi.ac.uk/pub/databases/metagenomics/mgnify_genomes/human-gut/v1.0/all_genomes/MGYG-HGUT-002/MGYG-HGUT-00231/genomes1/GUT_GENOME272934.gff.gz		2
GUT_GENOME272956	ZeeviD_2015__PNP_Main_423__bin.26	CIBIO	MAG	2617421	23	204815	41.39	97.99	0		0	0	0	19		GUT_GENOME001027	MGYG-HGUT-00189	Coprococcus sp900066115	ERS972061	ERP012929	Israel	Asia	ftp://ftp.ebi.ac.uk/pub/databases/metagenomics/mgnify_genomes/human-gut/v1.0/all_genomes/MGYG-HGUT-001/MGYG-HGUT-00189/genomes2/GUT_GENOME272956.gff.gz		4
GUT_GENOME272961	ZeeviD_2015__PNP_Main_423__bin.31	CIBIO	MAG	2967257	40	114515	42.93	99.33	0		0	0	5.64	18		GUT_GENOME000055	MGYG-HGUT-00018	Coprococcus eutactus	ERS972061	ERP012929	Israel	Asia	ftp://ftp.ebi.ac.uk/pub/databases/metagenomics/mgnify_genomes/human-gut/v1.0/all_genomes/MGYG-HGUT-000/MGYG-HGUT-00018/genomes1/GUT_GENOME272961.gff.gz		1
GUT_GENOME273004	ZeeviD_2015__PNP_Main_425__bin.47	CIBIO	MAG	2993674	27	137368	42.83	99.33	0		0	0	5.61	17		GUT_GENOME000055	MGYG-HGUT-00018	Coprococcus eutactus	ERS972063	ERP012929	Israel	Asia	ftp://ftp.ebi.ac.uk/pub/databases/metagenomics/mgnify_genomes/human-gut/v1.0/all_genomes/MGYG-HGUT-000/MGYG-HGUT-00018/genomes1/GUT_GENOME273004.gff.gz		1
GUT_GENOME273036	ZeeviD_2015__PNP_Main_427__bin.28	CIBIO	MAG	2713103	46	98926	41.12	99.33	0		0	0	0	15		GUT_GENOME001027	MGYG-HGUT-00189	Coprococcus sp900066115	ERS972065	ERP012929	Israel	Asia	ftp://ftp.ebi.ac.uk/pub/databases/metagenomics/mgnify_genomes/human-gut/v1.0/all_genomes/MGYG-HGUT-001/MGYG-HGUT-00189/genomes1/GUT_GENOME273036.gff.gz		4
GUT_GENOME273049	ZeeviD_2015__PNP_Main_428__bin.22	CIBIO	MAG	2867429	30	149339	44.08	99.33	0		0	0	8.21	17		GUT_GENOME001379	MGYG-HGUT-00231	Coprococcus eutactus_A	ERS972066	ERP012929	Israel	Asia	ftp://ftp.ebi.ac.uk/pub/databases/metagenomics/mgnify_genomes/human-gut/v1.0/all_genomes/MGYG-HGUT-002/MGYG-HGUT-00231/genomes1/GUT_GENOME273049.gff.gz		2
GUT_GENOME273077	ZeeviD_2015__PNP_Main_429__bin.42	CIBIO	MAG	2944119	24	205483	43.87	99.33	0		0	0	5.64	19		GUT_GENOME001379	MGYG-HGUT-00231	Coprococcus eutactus_A	ERS972067	ERP012929	Israel	Asia	ftp://ftp.ebi.ac.uk/pub/databases/metagenomics/mgnify_genomes/human-gut/v1.0/all_genomes/MGYG-HGUT-002/MGYG-HGUT-00231/genomes1/GUT_GENOME273077.gff.gz		2
GUT_GENOME273099	ZeeviD_2015__PNP_Main_42__bin.57	CIBIO	MAG	2717418	22	391356	44.1	97.32	0		0	0	6.05	19		GUT_GENOME001379	MGYG-HGUT-00231	Coprococcus eutactus_A	ERS971680	ERP012929	Israel	Asia	ftp://ftp.ebi.ac.uk/pub/databases/metagenomics/mgnify_genomes/human-gut/v1.0/all_genomes/MGYG-HGUT-002/MGYG-HGUT-00231/genomes4/GUT_GENOME273099.gff.gz		2
GUT_GENOME273164	ZeeviD_2015__PNP_Main_432__bin.51	CIBIO	MAG	3076849	33	141957	43.5	99.33	0.31		0	0	6.02	19		GUT_GENOME001379	MGYG-HGUT-00231	Coprococcus eutactus_A	ERS972070	ERP012929	Israel	Asia	ftp://ftp.ebi.ac.uk/pub/databases/metagenomics/mgnify_genomes/human-gut/v1.0/all_genomes/MGYG-HGUT-002/MGYG-HGUT-00231/genomes2/GUT_GENOME273164.gff.gz		2
GUT_GENOME273399	ZeeviD_2015__PNP_Main_441__bin.42	CIBIO	MAG	2623976	23	152364	41.21	99.33	0		0	23.81	0	19		GUT_GENOME001027	MGYG-HGUT-00189	Coprococcus sp900066115	ERS972079	ERP012929	Israel	Asia	ftp://ftp.ebi.ac.uk/pub/databases/metagenomics/mgnify_genomes/human-gut/v1.0/all_genomes/MGYG-HGUT-001/MGYG-HGUT-00189/genomes1/GUT_GENOME273399.gff.gz		4
GUT_GENOME273480	ZeeviD_2015__PNP_Main_445__bin.17	CIBIO	MAG	2534455	34	97826	41.19	97.32	0		0	0	0	19		GUT_GENOME001027	MGYG-HGUT-00189	Coprococcus sp000154245	ERS972083	ERP012929	Israel	Asia	ftp://ftp.ebi.ac.uk/pub/databases/metagenomics/mgnify_genomes/human-gut/v1.0/all_genomes/MGYG-HGUT-001/MGYG-HGUT-00189/genomes1/GUT_GENOME273480.gff.gz		5
GUT_GENOME273856	ZeeviD_2015__PNP_Main_45__bin.45	CIBIO	MAG	2804619	22	180683	43.98	96.98	0		0	0	6.09	18		GUT_GENOME001379	MGYG-HGUT-00231	Coprococcus eutactus_A	ERS971683	ERP012929	Israel	Asia	ftp://ftp.ebi.ac.uk/pub/databases/metagenomics/mgnify_genomes/human-gut/v1.0/all_genomes/MGYG-HGUT-002/MGYG-HGUT-00231/genomes2/GUT_GENOME273856.gff.gz		2
GUT_GENOME273912	ZeeviD_2015__PNP_Main_462__bin.1	CIBIO	MAG	2630075	23	265508	41.25	99.33	0		0	0	13.4	19		GUT_GENOME001027	MGYG-HGUT-00189	Coprococcus sp900066115	ERS972100	ERP012929	Israel	Asia	ftp://ftp.ebi.ac.uk/pub/databases/metagenomics/mgnify_genomes/human-gut/v1.0/all_genomes/MGYG-HGUT-001/MGYG-HGUT-00189/genomes2/GUT_GENOME273912.gff.gz		4
GUT_GENOME273976	ZeeviD_2015__PNP_Main_465__bin.35	CIBIO	MAG	2699003	24	221943	41.27	98.66	0		0	0	0	17		GUT_GENOME001027	MGYG-HGUT-00189	Coprococcus sp900066115	ERS972103	ERP012929	Israel	Asia	ftp://ftp.ebi.ac.uk/pub/databases/metagenomics/mgnify_genomes/human-gut/v1.0/all_genomes/MGYG-HGUT-001/MGYG-HGUT-00189/genomes2/GUT_GENOME273976.gff.gz		4
GUT_GENOME274022	ZeeviD_2015__PNP_Main_468__bin.36	CIBIO	MAG	2659247	28	187553	41.01	99.33	0		0	0	0	17		GUT_GENOME001027	MGYG-HGUT-00189	Coprococcus sp000154245	ERS972106	ERP012929	Israel	Asia	ftp://ftp.ebi.ac.uk/pub/databases/metagenomics/mgnify_genomes/human-gut/v1.0/all_genomes/MGYG-HGUT-001/MGYG-HGUT-00189/genomes1/GUT_GENOME274022.gff.gz		5
GUT_GENOME274069	ZeeviD_2015__PNP_Main_46__bin.40	CIBIO	MAG	2265076	97	33121	42.01	95.73	0		0	22.05	0	15		GUT_GENOME140272	MGYG-HGUT-02289	Coprococcus sp000433075	ERS971684	ERP012929	Israel	Asia	ftp://ftp.ebi.ac.uk/pub/databases/metagenomics/mgnify_genomes/human-gut/v1.0/all_genomes/MGYG-HGUT-022/MGYG-HGUT-02289/genomes1/GUT_GENOME274069.gff.gz		8
GUT_GENOME274311	ZeeviD_2015__PNP_Main_47__bin.39	CIBIO	MAG	2637901	19	246805	41.38	99.33	0		0	0	5.5	18		GUT_GENOME001027	MGYG-HGUT-00189	Coprococcus sp900066115	ERS971685	ERP012929	Israel	Asia	ftp://ftp.ebi.ac.uk/pub/databases/metagenomics/mgnify_genomes/human-gut/v1.0/all_genomes/MGYG-HGUT-001/MGYG-HGUT-00189/genomes2/GUT_GENOME274311.gff.gz		4
GUT_GENOME274419	ZeeviD_2015__PNP_Main_485__bin.28	CIBIO	MAG	2594724	29	116448	41.22	99.33	0.67		0	0	0	15		GUT_GENOME001027	MGYG-HGUT-00189	Coprococcus sp900066115	ERS972123	ERP012929	Israel	Asia	ftp://ftp.ebi.ac.uk/pub/databases/metagenomics/mgnify_genomes/human-gut/v1.0/all_genomes/MGYG-HGUT-001/MGYG-HGUT-00189/genomes1/GUT_GENOME274419.gff.gz		4
GUT_GENOME275214	ZeeviD_2015__PNP_Main_527__bin.36	CIBIO	MAG	2603264	116	31200	41.12	100	0		0	0	0	18		GUT_GENOME001027	MGYG-HGUT-00189	Coprococcus sp900066115	ERS972165	ERP012929	Israel	Asia	ftp://ftp.ebi.ac.uk/pub/databases/metagenomics/mgnify_genomes/human-gut/v1.0/all_genomes/MGYG-HGUT-001/MGYG-HGUT-00189/genomes1/GUT_GENOME275214.gff.gz		4
GUT_GENOME275283	ZeeviD_2015__PNP_Main_52__bin.51	CIBIO	MAG	2835723	23	225448	43.09	98.99	0		0	0	0	18		GUT_GENOME000055	MGYG-HGUT-00018	Coprococcus eutactus	ERS971690	ERP012929	Israel	Asia	ftp://ftp.ebi.ac.uk/pub/databases/metagenomics/mgnify_genomes/human-gut/v1.0/all_genomes/MGYG-HGUT-000/MGYG-HGUT-00018/genomes1/GUT_GENOME275283.gff.gz		1
GUT_GENOME275426	ZeeviD_2015__PNP_Main_539__bin.24	CIBIO	MAG	2583446	88	50368	41.33	99.33	0		0	0	0	18		GUT_GENOME001027	MGYG-HGUT-00189	Coprococcus sp900066115	ERS972177	ERP012929	Israel	Asia	ftp://ftp.ebi.ac.uk/pub/databases/metagenomics/mgnify_genomes/human-gut/v1.0/all_genomes/MGYG-HGUT-001/MGYG-HGUT-00189/genomes1/GUT_GENOME275426.gff.gz		4
GUT_GENOME275522	ZeeviD_2015__PNP_Main_545__bin.36	CIBIO	MAG	2586620	29	145159	41.25	97.32	0		0	0	0	19		GUT_GENOME001027	MGYG-HGUT-00189	Coprococcus sp900066115	ERS972183	ERP012929	Israel	Asia	ftp://ftp.ebi.ac.uk/pub/databases/metagenomics/mgnify_genomes/human-gut/v1.0/all_genomes/MGYG-HGUT-001/MGYG-HGUT-00189/genomes1/GUT_GENOME275522.gff.gz		4
GUT_GENOME275548	ZeeviD_2015__PNP_Main_547__bin.51	CIBIO	MAG	2821220	108	38287	43.11	98.32	0.34		0	0	0	17		GUT_GENOME000055	MGYG-HGUT-00018	Coprococcus eutactus	ERS972185	ERP012929	Israel	Asia	ftp://ftp.ebi.ac.uk/pub/databases/metagenomics/mgnify_genomes/human-gut/v1.0/all_genomes/MGYG-HGUT-000/MGYG-HGUT-00018/genomes1/GUT_GENOME275548.gff.gz		1
GUT_GENOME275687	ZeeviD_2015__PNP_Main_553__bin.46	CIBIO	MAG	2769019	45	94135	41.01	99.33	0		0	0	13.4	19		GUT_GENOME001027	MGYG-HGUT-00189	Coprococcus sp000154245	ERS972191	ERP012929	Israel	Asia	ftp://ftp.ebi.ac.uk/pub/databases/metagenomics/mgnify_genomes/human-gut/v1.0/all_genomes/MGYG-HGUT-001/MGYG-HGUT-00189/genomes2/GUT_GENOME275687.gff.gz		5
GUT_GENOME276168	ZeeviD_2015__PNP_Main_57__bin.13	CIBIO	MAG	2967728	33	265563	43.87	99.33	0.34		0	0	6.12	18		GUT_GENOME001379	MGYG-HGUT-00231	Coprococcus eutactus_A	ERS971695	ERP012929	Israel	Asia	ftp://ftp.ebi.ac.uk/pub/databases/metagenomics/mgnify_genomes/human-gut/v1.0/all_genomes/MGYG-HGUT-002/MGYG-HGUT-00231/genomes1/GUT_GENOME276168.gff.gz		2
GUT_GENOME276425	ZeeviD_2015__PNP_Main_593__bin.19	CIBIO	MAG	2678334	51	96503	40.89	98.32	0.67		0	0	0	15		GUT_GENOME001027	MGYG-HGUT-00189	Coprococcus sp000154245	ERS972231	ERP012929	Israel	Asia	ftp://ftp.ebi.ac.uk/pub/databases/metagenomics/mgnify_genomes/human-gut/v1.0/all_genomes/MGYG-HGUT-001/MGYG-HGUT-00189/genomes1/GUT_GENOME276425.gff.gz		5
GUT_GENOME276427	ZeeviD_2015__PNP_Main_593__bin.20	CIBIO	MAG	2367602	46	87785	41.89	98.99	0		0	23.48	0	16		GUT_GENOME140272	MGYG-HGUT-02289	Coprococcus sp000433075	ERS972231	ERP012929	Israel	Asia	ftp://ftp.ebi.ac.uk/pub/databases/metagenomics/mgnify_genomes/human-gut/v1.0/all_genomes/MGYG-HGUT-022/MGYG-HGUT-02289/genomes1/GUT_GENOME276427.gff.gz		8
GUT_GENOME276570	ZeeviD_2015__PNP_Main_5__bin.8	CIBIO	MAG	2388790	53	86504	41.98	99.33	0		0	0	11.45	14		GUT_GENOME140272	MGYG-HGUT-02289	Coprococcus sp000433075	ERS971643	ERP012929	Israel	Asia	ftp://ftp.ebi.ac.uk/pub/databases/metagenomics/mgnify_genomes/human-gut/v1.0/all_genomes/MGYG-HGUT-022/MGYG-HGUT-02289/genomes1/GUT_GENOME276570.gff.gz		8
GUT_GENOME276725	ZeeviD_2015__PNP_Main_60__bin.28	CIBIO	MAG	2487136	30	195913	41.23	97.99	0		0	26.09	10.67	16		GUT_GENOME001027	MGYG-HGUT-00189	Coprococcus sp000154245	ERS971698	ERP012929	Israel	Asia	ftp://ftp.ebi.ac.uk/pub/databases/metagenomics/mgnify_genomes/human-gut/v1.0/all_genomes/MGYG-HGUT-001/MGYG-HGUT-00189/genomes1/GUT_GENOME276725.gff.gz		5
GUT_GENOME277347	ZeeviD_2015__PNP_Main_646__bin.6	CIBIO	MAG	2647762	35	125657	41.16	98.66	0		0	0	10.8	19		GUT_GENOME001027	MGYG-HGUT-00189	Coprococcus sp900066115	ERS972284	ERP012929	Israel	Asia	ftp://ftp.ebi.ac.uk/pub/databases/metagenomics/mgnify_genomes/human-gut/v1.0/all_genomes/MGYG-HGUT-001/MGYG-HGUT-00189/genomes1/GUT_GENOME277347.gff.gz		4
GUT_GENOME277462	ZeeviD_2015__PNP_Main_652__bin.5	CIBIO	MAG	2737840	98	43310	44.27	95.3	0		0	0	7.93	17		GUT_GENOME001379	MGYG-HGUT-00231	Coprococcus eutactus_A	ERS972290	ERP012929	Israel	Asia	ftp://ftp.ebi.ac.uk/pub/databases/metagenomics/mgnify_genomes/human-gut/v1.0/all_genomes/MGYG-HGUT-002/MGYG-HGUT-00231/genomes1/GUT_GENOME277462.gff.gz		2
GUT_GENOME277667	ZeeviD_2015__PNP_Main_666__bin.15	CIBIO	MAG	2495805	42	88369	41.63	99.33	0		0	23.61	0	17		GUT_GENOME140272	MGYG-HGUT-02289	Coprococcus sp000433075	ERS972304	ERP012929	Israel	Asia	ftp://ftp.ebi.ac.uk/pub/databases/metagenomics/mgnify_genomes/human-gut/v1.0/all_genomes/MGYG-HGUT-022/MGYG-HGUT-02289/genomes1/GUT_GENOME277667.gff.gz		8
GUT_GENOME277922	ZeeviD_2015__PNP_Main_67__bin.54	CIBIO	MAG	2838015	29	126882	44.14	99.33	0		0	43.97	0	19		GUT_GENOME001379	MGYG-HGUT-00231	Coprococcus eutactus_A	ERS971705	ERP012929	Israel	Asia	ftp://ftp.ebi.ac.uk/pub/databases/metagenomics/mgnify_genomes/human-gut/v1.0/all_genomes/MGYG-HGUT-002/MGYG-HGUT-00231/genomes2/GUT_GENOME277922.gff.gz		2
GUT_GENOME278076	ZeeviD_2015__PNP_Main_688__bin.34	CIBIO	MAG	2765204	46	95972	43.16	98.86	0		0	0	0	17		GUT_GENOME000055	MGYG-HGUT-00018	Coprococcus eutactus	ERS972326	ERP012929	Israel	Asia	ftp://ftp.ebi.ac.uk/pub/databases/metagenomics/mgnify_genomes/human-gut/v1.0/all_genomes/MGYG-HGUT-000/MGYG-HGUT-00018/genomes1/GUT_GENOME278076.gff.gz		1
GUT_GENOME278484	ZeeviD_2015__PNP_Main_70__bin.18	CIBIO	MAG	2488500	195	18994	44.49	96.09	0.67		0	0	6.09	17		GUT_GENOME001379	MGYG-HGUT-00231	Coprococcus eutactus_A	ERS971708	ERP012929	Israel	Asia	ftp://ftp.ebi.ac.uk/pub/databases/metagenomics/mgnify_genomes/human-gut/v1.0/all_genomes/MGYG-HGUT-002/MGYG-HGUT-00231/genomes2/GUT_GENOME278484.gff.gz		2
GUT_GENOME278488	ZeeviD_2015__PNP_Main_70__bin.27	CIBIO	MAG	2648467	49	74920	41.28	99.33	0		0	25.18	11.45	17		GUT_GENOME001027	MGYG-HGUT-00189	Coprococcus sp900066115	ERS971708	ERP012929	Israel	Asia	ftp://ftp.ebi.ac.uk/pub/databases/metagenomics/mgnify_genomes/human-gut/v1.0/all_genomes/MGYG-HGUT-001/MGYG-HGUT-00189/genomes1/GUT_GENOME278488.gff.gz		4
GUT_GENOME278548	ZeeviD_2015__PNP_Main_712__bin.2	CIBIO	MAG	2650156	35	95980	41.01	99.33	0		0	0	10.12	19		GUT_GENOME001027	MGYG-HGUT-00189	Coprococcus sp000154245	ERS972350	ERP012929	Israel	Asia	ftp://ftp.ebi.ac.uk/pub/databases/metagenomics/mgnify_genomes/human-gut/v1.0/all_genomes/MGYG-HGUT-001/MGYG-HGUT-00189/genomes1/GUT_GENOME278548.gff.gz		5
GUT_GENOME278681	ZeeviD_2015__PNP_Main_718__bin.3	CIBIO	MAG	2446690	96	37664	44.55	95.75	0		0	0	0	17		GUT_GENOME001379	MGYG-HGUT-00231	Coprococcus eutactus_A	ERS972356	ERP012929	Israel	Asia	ftp://ftp.ebi.ac.uk/pub/databases/metagenomics/mgnify_genomes/human-gut/v1.0/all_genomes/MGYG-HGUT-002/MGYG-HGUT-00231/genomes1/GUT_GENOME278681.gff.gz		2
GUT_GENOME279157	ZeeviD_2015__PNP_Main_74__bin.31	CIBIO	MAG	2665749	36	114225	41.04	99.33	0		0	0	12.34	19		GUT_GENOME001027	MGYG-HGUT-00189	Coprococcus sp000154245	ERS971712	ERP012929	Israel	Asia	ftp://ftp.ebi.ac.uk/pub/databases/metagenomics/mgnify_genomes/human-gut/v1.0/all_genomes/MGYG-HGUT-001/MGYG-HGUT-00189/genomes1/GUT_GENOME279157.gff.gz		5
GUT_GENOME279267	ZeeviD_2015__PNP_Main_756__bin.31	CIBIO	MAG	2858869	82	55826	44.22	98.29	0		0	0	5.44	18		GUT_GENOME001379	MGYG-HGUT-00231	Coprococcus eutactus_A	ERS972394	ERP012929	Israel	Asia	ftp://ftp.ebi.ac.uk/pub/databases/metagenomics/mgnify_genomes/human-gut/v1.0/all_genomes/MGYG-HGUT-002/MGYG-HGUT-00231/genomes3/GUT_GENOME279267.gff.gz		2
GUT_GENOME279401	ZeeviD_2015__PNP_Main_764__bin.35	CIBIO	MAG	2594154	35	125780	41.12	98.66	0		0	0	0	17		GUT_GENOME001027	MGYG-HGUT-00189	Coprococcus sp000154245	ERS972402	ERP012929	Israel	Asia	ftp://ftp.ebi.ac.uk/pub/databases/metagenomics/mgnify_genomes/human-gut/v1.0/all_genomes/MGYG-HGUT-001/MGYG-HGUT-00189/genomes2/GUT_GENOME279401.gff.gz		5
GUT_GENOME279528	ZeeviD_2015__PNP_Main_773__bin.22	CIBIO	MAG	2638493	27	132660	41.27	99.33	0		0	0	0	18		GUT_GENOME001027	MGYG-HGUT-00189	Coprococcus sp900066115	ERS972411	ERP012929	Israel	Asia	ftp://ftp.ebi.ac.uk/pub/databases/metagenomics/mgnify_genomes/human-gut/v1.0/all_genomes/MGYG-HGUT-001/MGYG-HGUT-00189/genomes1/GUT_GENOME279528.gff.gz		4
GUT_GENOME279568	ZeeviD_2015__PNP_Main_776__bin.19	CIBIO	MAG	2463423	174	22981	41.61	95.97	0.67		0	26.03	0	16		GUT_GENOME001027	MGYG-HGUT-00189	Coprococcus sp900066115	ERS972414	ERP012929	Israel	Asia	ftp://ftp.ebi.ac.uk/pub/databases/metagenomics/mgnify_genomes/human-gut/v1.0/all_genomes/MGYG-HGUT-001/MGYG-HGUT-00189/genomes1/GUT_GENOME279568.gff.gz		4
GUT_GENOME279781	ZeeviD_2015__PNP_Main_7__bin.1	CIBIO	MAG	3148532	26	263685	42.21	98.66	0.31		0	0	16.72	17		GUT_GENOME000055	MGYG-HGUT-00018	Coprococcus eutactus	ERS971645	ERP012929	Israel	Asia	ftp://ftp.ebi.ac.uk/pub/databases/metagenomics/mgnify_genomes/human-gut/v1.0/all_genomes/MGYG-HGUT-000/MGYG-HGUT-00018/genomes1/GUT_GENOME279781.gff.gz		1
GUT_GENOME279849	ZeeviD_2015__PNP_Main_81__bin.5	CIBIO	MAG	2845775	39	191961	44.06	99.33	0		0	23.61	0	18		GUT_GENOME001379	MGYG-HGUT-00231	Coprococcus eutactus_A	ERS971719	ERP012929	Israel	Asia	ftp://ftp.ebi.ac.uk/pub/databases/metagenomics/mgnify_genomes/human-gut/v1.0/all_genomes/MGYG-HGUT-002/MGYG-HGUT-00231/genomes1/GUT_GENOME279849.gff.gz		2
GUT_GENOME279918	ZeeviD_2015__PNP_Main_83__bin.5	CIBIO	MAG	2856472	24	166052	44.15	99.33	0		0	0	5.64	18		GUT_GENOME001379	MGYG-HGUT-00231	Coprococcus eutactus_A	ERS971721	ERP012929	Israel	Asia	ftp://ftp.ebi.ac.uk/pub/databases/metagenomics/mgnify_genomes/human-gut/v1.0/all_genomes/MGYG-HGUT-002/MGYG-HGUT-00231/genomes3/GUT_GENOME279918.gff.gz		2
GUT_GENOME279972	ZeeviD_2015__PNP_Main_85__bin.37	CIBIO	MAG	2299567	54	62625	41.97	100	0		0	0	5.5	15		GUT_GENOME140272	MGYG-HGUT-02289	Coprococcus sp000433075	ERS971723	ERP012929	Israel	Asia	ftp://ftp.ebi.ac.uk/pub/databases/metagenomics/mgnify_genomes/human-gut/v1.0/all_genomes/MGYG-HGUT-022/MGYG-HGUT-02289/genomes1/GUT_GENOME279972.gff.gz		8
GUT_GENOME279997	ZeeviD_2015__PNP_Main_86__bin.3	CIBIO	MAG	2756123	34	111674	44.06	97.32	0.67		0	0	0	17		GUT_GENOME001379	MGYG-HGUT-00231	Coprococcus eutactus_A	ERS971724	ERP012929	Israel	Asia	ftp://ftp.ebi.ac.uk/pub/databases/metagenomics/mgnify_genomes/human-gut/v1.0/all_genomes/MGYG-HGUT-002/MGYG-HGUT-00231/genomes1/GUT_GENOME279997.gff.gz		2
GUT_GENOME280050	ZeeviD_2015__PNP_Main_88__bin.33	CIBIO	MAG	2804128	24	173024	44.1	99.33	0		0	0	11.45	19		GUT_GENOME001379	MGYG-HGUT-00231	Coprococcus eutactus_A	ERS971726	ERP012929	Israel	Asia	ftp://ftp.ebi.ac.uk/pub/databases/metagenomics/mgnify_genomes/human-gut/v1.0/all_genomes/MGYG-HGUT-002/MGYG-HGUT-00231/genomes3/GUT_GENOME280050.gff.gz		2
GUT_GENOME280127	ZeeviD_2015__PNP_Main_91__bin.38	CIBIO	MAG	2606435	32	115826	41.32	99.33	0		0	0	0	15		GUT_GENOME001027	MGYG-HGUT-00189	Coprococcus sp900066115	ERS971729	ERP012929	Israel	Asia	ftp://ftp.ebi.ac.uk/pub/databases/metagenomics/mgnify_genomes/human-gut/v1.0/all_genomes/MGYG-HGUT-001/MGYG-HGUT-00189/genomes2/GUT_GENOME280127.gff.gz		4
GUT_GENOME280145	ZeeviD_2015__PNP_Main_92__bin.18	CIBIO	MAG	2844023	23	170746	44.05	99.33	0		0	0	0	18		GUT_GENOME001379	MGYG-HGUT-00231	Coprococcus eutactus_A	ERS971730	ERP012929	Israel	Asia	ftp://ftp.ebi.ac.uk/pub/databases/metagenomics/mgnify_genomes/human-gut/v1.0/all_genomes/MGYG-HGUT-002/MGYG-HGUT-00231/genomes1/GUT_GENOME280145.gff.gz		2
GUT_GENOME280173	ZeeviD_2015__PNP_Main_93__bin.21	CIBIO	MAG	2945676	46	81137	44.01	97.99	0		0	0	0	17		GUT_GENOME001379	MGYG-HGUT-00231	Coprococcus eutactus_A	ERS971731	ERP012929	Israel	Asia	ftp://ftp.ebi.ac.uk/pub/databases/metagenomics/mgnify_genomes/human-gut/v1.0/all_genomes/MGYG-HGUT-002/MGYG-HGUT-00231/genomes1/GUT_GENOME280173.gff.gz		2
GUT_GENOME280403	ZeeviD_2015__PNP_Validation_13__bin.1	CIBIO	MAG	2619383	34	130595	41.47	97.99	0		0	22.31	10.12	17		GUT_GENOME001027	MGYG-HGUT-00189	Coprococcus sp900066115	ERS953832	ERP012929	Israel	Asia	ftp://ftp.ebi.ac.uk/pub/databases/metagenomics/mgnify_genomes/human-gut/v1.0/all_genomes/MGYG-HGUT-001/MGYG-HGUT-00189/genomes1/GUT_GENOME280403.gff.gz		4
GUT_GENOME280584	ZeeviD_2015__PNP_Validation_22__bin.43	CIBIO	MAG	2442814	83	47806	41.26	97.99	0		0	0	0	16		GUT_GENOME001027	MGYG-HGUT-00189	Coprococcus sp000154245	ERS953841	ERP012929	Israel	Asia	ftp://ftp.ebi.ac.uk/pub/databases/metagenomics/mgnify_genomes/human-gut/v1.0/all_genomes/MGYG-HGUT-001/MGYG-HGUT-00189/genomes1/GUT_GENOME280584.gff.gz		5
GUT_GENOME280979	ZeeviD_2015__PNP_Validation_43__bin.49	CIBIO	MAG	2873489	25	162792	44.05	99.19	0		0	0	6.8	18		GUT_GENOME001379	MGYG-HGUT-00231	Coprococcus eutactus_A	ERS953862	ERP012929	Israel	Asia	ftp://ftp.ebi.ac.uk/pub/databases/metagenomics/mgnify_genomes/human-gut/v1.0/all_genomes/MGYG-HGUT-002/MGYG-HGUT-00231/genomes3/GUT_GENOME280979.gff.gz		2
GUT_GENOME281057	ZeeviD_2015__PNP_Validation_46__bin.8	CIBIO	MAG	2598485	207	19703	44.36	96.96	0.86		0	0	6.09	18		GUT_GENOME001379	MGYG-HGUT-00231	Coprococcus eutactus_A	ERS953865	ERP012929	Israel	Asia	ftp://ftp.ebi.ac.uk/pub/databases/metagenomics/mgnify_genomes/human-gut/v1.0/all_genomes/MGYG-HGUT-002/MGYG-HGUT-00231/genomes1/GUT_GENOME281057.gff.gz		2
GUT_GENOME281118	ZeeviD_2015__PNP_Validation_49__bin.12	CIBIO	MAG	2585876	40	88576	41.06	95.3	0		0	25.77	0	16		GUT_GENOME001027	MGYG-HGUT-00189	Coprococcus sp000154245	ERS953868	ERP012929	Israel	Asia	ftp://ftp.ebi.ac.uk/pub/databases/metagenomics/mgnify_genomes/human-gut/v1.0/all_genomes/MGYG-HGUT-001/MGYG-HGUT-00189/genomes2/GUT_GENOME281118.gff.gz		5
GUT_GENOME281167	ZeeviD_2015__PNP_Validation_50__bin.13	CIBIO	MAG	2480495	34	149207	41.92	98.66	0		0	23.61	0	19		GUT_GENOME140272	MGYG-HGUT-02289	Coprococcus sp000433075	ERS953869	ERP012929	Israel	Asia	ftp://ftp.ebi.ac.uk/pub/databases/metagenomics/mgnify_genomes/human-gut/v1.0/all_genomes/MGYG-HGUT-022/MGYG-HGUT-02289/genomes1/GUT_GENOME281167.gff.gz		8
GUT_GENOME281721	ZeeviD_2015__PNP_Validation_7__bin.65	CIBIO	MAG	2632567	38	96089	41.34	99.33	0		0	0	0	18		GUT_GENOME001027	MGYG-HGUT-00189	Coprococcus sp900066115	ERS953826	ERP012929	Israel	Asia	ftp://ftp.ebi.ac.uk/pub/databases/metagenomics/mgnify_genomes/human-gut/v1.0/all_genomes/MGYG-HGUT-001/MGYG-HGUT-00189/genomes1/GUT_GENOME281721.gff.gz		4
GUT_GENOME281759	ZeeviD_2015__PNP_Validation_82__bin.10	CIBIO	MAG	2635412	30	171713	41.47	99.33	0		0	23.61	0	19		GUT_GENOME001027	MGYG-HGUT-00189	Coprococcus sp900066115	ERS953901	ERP012929	Israel	Asia	ftp://ftp.ebi.ac.uk/pub/databases/metagenomics/mgnify_genomes/human-gut/v1.0/all_genomes/MGYG-HGUT-001/MGYG-HGUT-00189/genomes1/GUT_GENOME281759.gff.gz		4
GUT_GENOME281974	ZellerG_2014__CCIS02124300ST-4-0__bin.62	CIBIO	MAG	2679806	24	224351	41.28	99.33	0		0	0	11.38	18		GUT_GENOME001027	MGYG-HGUT-00189	Coprococcus sp900066115	ERS436722	ERP005534	France	Europe	ftp://ftp.ebi.ac.uk/pub/databases/metagenomics/mgnify_genomes/human-gut/v1.0/all_genomes/MGYG-HGUT-001/MGYG-HGUT-00189/genomes2/GUT_GENOME281974.gff.gz		4
GUT_GENOME282128	ZellerG_2014__CCIS07277498ST-4-0__bin.29	CIBIO	MAG	2870461	33	140276	44.19	97.32	0		0	0	0	17		GUT_GENOME001379	MGYG-HGUT-00231	Coprococcus eutactus_A	ERS436785	ERP005534	France	Europe	ftp://ftp.ebi.ac.uk/pub/databases/metagenomics/mgnify_genomes/human-gut/v1.0/all_genomes/MGYG-HGUT-002/MGYG-HGUT-00231/genomes3/GUT_GENOME282128.gff.gz		2
GUT_GENOME282281	ZellerG_2014__CCIS09568613ST-4-0__bin.87	CIBIO	MAG	2673186	59	95612	41.03	99.33	0		0	0	0	16		GUT_GENOME001027	MGYG-HGUT-00189	Coprococcus sp000154245	ERS436792	ERP005534	France	Europe	ftp://ftp.ebi.ac.uk/pub/databases/metagenomics/mgnify_genomes/human-gut/v1.0/all_genomes/MGYG-HGUT-001/MGYG-HGUT-00189/genomes1/GUT_GENOME282281.gff.gz		5
GUT_GENOME282292	ZellerG_2014__CCIS10706551ST-3-0__bin.17	CIBIO	MAG	2896505	41	122064	44.03	99.33	0		0	0	19.76	19		GUT_GENOME001379	MGYG-HGUT-00231	Coprococcus eutactus_A	ERS436669	ERP005534	France	Europe	ftp://ftp.ebi.ac.uk/pub/databases/metagenomics/mgnify_genomes/human-gut/v1.0/all_genomes/MGYG-HGUT-002/MGYG-HGUT-00231/genomes1/GUT_GENOME282292.gff.gz		2
GUT_GENOME282415	ZellerG_2014__CCIS11362406ST-4-0__bin.42	CIBIO	MAG	2931497	26	235375	44.07	99.33	0		0	0	0	16		GUT_GENOME001379	MGYG-HGUT-00231	Coprococcus eutactus_A	ERS436697	ERP005534	France	Europe	ftp://ftp.ebi.ac.uk/pub/databases/metagenomics/mgnify_genomes/human-gut/v1.0/all_genomes/MGYG-HGUT-002/MGYG-HGUT-00231/genomes2/GUT_GENOME282415.gff.gz		2
GUT_GENOME282697	ZellerG_2014__CCIS19142497ST-3-0__bin.14	CIBIO	MAG	2740219	87	45215	44.23	95.86	0		0	19.5	0	16		GUT_GENOME001379	MGYG-HGUT-00231	Coprococcus eutactus_A	ERS436650	ERP005534	France	Europe	ftp://ftp.ebi.ac.uk/pub/databases/metagenomics/mgnify_genomes/human-gut/v1.0/all_genomes/MGYG-HGUT-002/MGYG-HGUT-00231/genomes3/GUT_GENOME282697.gff.gz		2
GUT_GENOME282714	ZellerG_2014__CCIS20795251ST-4-0__bin.33	CIBIO	MAG	2628208	23	292202	41.17	99.33	0		0	0	0	17		GUT_GENOME001027	MGYG-HGUT-00189	Coprococcus sp900066115	ERS436784	ERP005534	France	Europe	ftp://ftp.ebi.ac.uk/pub/databases/metagenomics/mgnify_genomes/human-gut/v1.0/all_genomes/MGYG-HGUT-001/MGYG-HGUT-00189/genomes1/GUT_GENOME282714.gff.gz		4
GUT_GENOME282833	ZellerG_2014__CCIS22275061ST-4-0__bin.82	CIBIO	MAG	2520467	34	153440	41.2	95.3	0		0	0	0	16		GUT_GENOME001027	MGYG-HGUT-00189	Coprococcus sp900066115	ERS436667	ERP005534	France	Europe	ftp://ftp.ebi.ac.uk/pub/databases/metagenomics/mgnify_genomes/human-gut/v1.0/all_genomes/MGYG-HGUT-001/MGYG-HGUT-00189/genomes1/GUT_GENOME282833.gff.gz		4
GUT_GENOME282957	ZellerG_2014__CCIS23164343ST-4-0__bin.73	CIBIO	MAG	2659657	23	282503	41.24	99.33	0		0	0	0	17		GUT_GENOME001027	MGYG-HGUT-00189	Coprococcus sp900066115	ERS436787	ERP005534	France	Europe	ftp://ftp.ebi.ac.uk/pub/databases/metagenomics/mgnify_genomes/human-gut/v1.0/all_genomes/MGYG-HGUT-001/MGYG-HGUT-00189/genomes2/GUT_GENOME282957.gff.gz		4
GUT_GENOME283017	ZellerG_2014__CCIS27304052ST-3-0__bin.15	CIBIO	MAG	2553998	42	97021	41.19	98.32	0.34		0	0	0	15		GUT_GENOME001027	MGYG-HGUT-00189	Coprococcus sp000154245	ERS436644	ERP005534	France	Europe	ftp://ftp.ebi.ac.uk/pub/databases/metagenomics/mgnify_genomes/human-gut/v1.0/all_genomes/MGYG-HGUT-001/MGYG-HGUT-00189/genomes1/GUT_GENOME283017.gff.gz		5
GUT_GENOME283144	ZellerG_2014__CCIS32452666ST-4-0__bin.25	CIBIO	MAG	2621086	103	43138	44.3	96.98	0.22		0	0	0	14		GUT_GENOME001379	MGYG-HGUT-00231	Coprococcus eutactus_A	ERS436654	ERP005534	France	Europe	ftp://ftp.ebi.ac.uk/pub/databases/metagenomics/mgnify_genomes/human-gut/v1.0/all_genomes/MGYG-HGUT-002/MGYG-HGUT-00231/genomes3/GUT_GENOME283144.gff.gz		2
GUT_GENOME283233	ZellerG_2014__CCIS34604008ST-4-0__bin.54	CIBIO	MAG	2654285	17	220788	44.22	98.66	0		0	0	0	15		GUT_GENOME001379	MGYG-HGUT-00231	Coprococcus eutactus_A	ERS436772	ERP005534	France	Europe	ftp://ftp.ebi.ac.uk/pub/databases/metagenomics/mgnify_genomes/human-gut/v1.0/all_genomes/MGYG-HGUT-002/MGYG-HGUT-00231/genomes3/GUT_GENOME283233.gff.gz		2
GUT_GENOME283319	ZellerG_2014__CCIS36797902ST-4-0__bin.24	CIBIO	MAG	2701065	163	25536	44.37	98.21	0.34		0	18.4	9.3	14		GUT_GENOME001379	MGYG-HGUT-00231	Coprococcus eutactus_A	ERS436781	ERP005534	France	Europe	ftp://ftp.ebi.ac.uk/pub/databases/metagenomics/mgnify_genomes/human-gut/v1.0/all_genomes/MGYG-HGUT-002/MGYG-HGUT-00231/genomes1/GUT_GENOME283319.gff.gz		2
GUT_GENOME283436	ZellerG_2014__CCIS41222843ST-4-0__bin.44	CIBIO	MAG	2954943	32	148792	42.98	99.33	0		0	0	0	16		GUT_GENOME000055	MGYG-HGUT-00018	Coprococcus eutactus	ERS436688	ERP005534	France	Europe	ftp://ftp.ebi.ac.uk/pub/databases/metagenomics/mgnify_genomes/human-gut/v1.0/all_genomes/MGYG-HGUT-000/MGYG-HGUT-00018/genomes1/GUT_GENOME283436.gff.gz		1
GUT_GENOME283542	ZellerG_2014__CCIS41806458ST-4-0__bin.36	CIBIO	MAG	2899103	30	201556	43.13	99.33	0		0	51.99	0	17		GUT_GENOME000055	MGYG-HGUT-00018	Coprococcus eutactus	ERS436731	ERP005534	France	Europe	ftp://ftp.ebi.ac.uk/pub/databases/metagenomics/mgnify_genomes/human-gut/v1.0/all_genomes/MGYG-HGUT-000/MGYG-HGUT-00018/genomes1/GUT_GENOME283542.gff.gz		1
GUT_GENOME283661	ZellerG_2014__CCIS45571137ST-3-0__bin.8	CIBIO	MAG	2890428	84	53949	44.09	98.66	0.22		0	25.11	0	17		GUT_GENOME001379	MGYG-HGUT-00231	Coprococcus eutactus_A	ERS436658	ERP005534	France	Europe	ftp://ftp.ebi.ac.uk/pub/databases/metagenomics/mgnify_genomes/human-gut/v1.0/all_genomes/MGYG-HGUT-002/MGYG-HGUT-00231/genomes1/GUT_GENOME283661.gff.gz		2
GUT_GENOME284259	ZellerG_2014__CCIS62605362ST-3-0__bin.22	CIBIO	MAG	2513353	69	57811	41.01	96.34	0		0	0	5.4	14		GUT_GENOME001027	MGYG-HGUT-00189	Coprococcus sp000154245	ERS436712	ERP005534	France	Europe	ftp://ftp.ebi.ac.uk/pub/databases/metagenomics/mgnify_genomes/human-gut/v1.0/all_genomes/MGYG-HGUT-001/MGYG-HGUT-00189/genomes2/GUT_GENOME284259.gff.gz		5
GUT_GENOME284371	ZellerG_2014__CCIS63910149ST-4-0__bin.10	CIBIO	MAG	2835029	44	125293	44.14	97.99	0		0	0	0	17		GUT_GENOME001379	MGYG-HGUT-00231	Coprococcus eutactus_A	ERS436739	ERP005534	France	Europe	ftp://ftp.ebi.ac.uk/pub/databases/metagenomics/mgnify_genomes/human-gut/v1.0/all_genomes/MGYG-HGUT-002/MGYG-HGUT-00231/genomes2/GUT_GENOME284371.gff.gz		2
GUT_GENOME284533	ZellerG_2014__CCIS71578391ST-4-0__bin.69	CIBIO	MAG	2761955	32	153901	44	99.33	0		0	0	0	15		GUT_GENOME001379	MGYG-HGUT-00231	Coprococcus eutactus_A	ERS436779	ERP005534	France	Europe	ftp://ftp.ebi.ac.uk/pub/databases/metagenomics/mgnify_genomes/human-gut/v1.0/all_genomes/MGYG-HGUT-002/MGYG-HGUT-00231/genomes2/GUT_GENOME284533.gff.gz		2
GUT_GENOME284563	ZellerG_2014__CCIS74239020ST-4-0__bin.30	CIBIO	MAG	2612845	64	60694	41.2	97.99	0.67		0	11.35	0	16		GUT_GENOME001027	MGYG-HGUT-00189	Coprococcus sp000154245	ERS436777	ERP005534	France	Europe	ftp://ftp.ebi.ac.uk/pub/databases/metagenomics/mgnify_genomes/human-gut/v1.0/all_genomes/MGYG-HGUT-001/MGYG-HGUT-00189/genomes2/GUT_GENOME284563.gff.gz		5
GUT_GENOME284646	ZellerG_2014__CCIS76563044ST-4-0__bin.50	CIBIO	MAG	2780559	27	139390	44.06	97.32	0		0	9.26	0	16		GUT_GENOME001379	MGYG-HGUT-00231	Coprococcus eutactus_A	ERS436734	ERP005534	France	Europe	ftp://ftp.ebi.ac.uk/pub/databases/metagenomics/mgnify_genomes/human-gut/v1.0/all_genomes/MGYG-HGUT-002/MGYG-HGUT-00231/genomes2/GUT_GENOME284646.gff.gz		2
GUT_GENOME284746	ZellerG_2014__CCIS77252613ST-4-0__bin.74	CIBIO	MAG	2811334	25	218045	44.1	98.15	0		0	0	0	16		GUT_GENOME001379	MGYG-HGUT-00231	Coprococcus eutactus_A	ERS436749	ERP005534	France	Europe	ftp://ftp.ebi.ac.uk/pub/databases/metagenomics/mgnify_genomes/human-gut/v1.0/all_genomes/MGYG-HGUT-002/MGYG-HGUT-00231/genomes2/GUT_GENOME284746.gff.gz		2
GUT_GENOME284841	ZellerG_2014__CCIS80834637ST-4-0__bin.49	CIBIO	MAG	2698026	27	137262	41.22	99.33	0		0	0	10.74	15		GUT_GENOME001027	MGYG-HGUT-00189	Coprococcus sp900066115	ERS436738	ERP005534	France	Europe	ftp://ftp.ebi.ac.uk/pub/databases/metagenomics/mgnify_genomes/human-gut/v1.0/all_genomes/MGYG-HGUT-001/MGYG-HGUT-00189/genomes2/GUT_GENOME284841.gff.gz		4
GUT_GENOME284963	ZellerG_2014__CCIS81887263ST-4-0__bin.6	CIBIO	MAG	2608288	43	110925	41.13	99.33	0.58		0	0	0	16		GUT_GENOME001027	MGYG-HGUT-00189	Coprococcus sp000154245	ERS436689	ERP005534	France	Europe	ftp://ftp.ebi.ac.uk/pub/databases/metagenomics/mgnify_genomes/human-gut/v1.0/all_genomes/MGYG-HGUT-001/MGYG-HGUT-00189/genomes2/GUT_GENOME284963.gff.gz		5
GUT_GENOME285246	ZellerG_2014__CCIS88317640ST-4-0__bin.49	CIBIO	MAG	2676171	39	96220	41.25	98.66	0.73		0	0	6.29	16		GUT_GENOME001027	MGYG-HGUT-00189	Coprococcus sp900066115	ERS436799	ERP005534	France	Europe	ftp://ftp.ebi.ac.uk/pub/databases/metagenomics/mgnify_genomes/human-gut/v1.0/all_genomes/MGYG-HGUT-001/MGYG-HGUT-00189/genomes1/GUT_GENOME285246.gff.gz		4
GUT_GENOME285989	ZellerG_2014__CCMD26925580ST-21-0__bin.13	CIBIO	MAG	2771688	32	105472	44.39	97.32	0		0	70.45	0	17		GUT_GENOME001379	MGYG-HGUT-00231	Coprococcus eutactus_A	ERS436815	ERP005534	Germany	Europe	ftp://ftp.ebi.ac.uk/pub/databases/metagenomics/mgnify_genomes/human-gut/v1.0/all_genomes/MGYG-HGUT-002/MGYG-HGUT-00231/genomes4/GUT_GENOME285989.gff.gz		2
GUT_GENOME286234	ZellerG_2014__CCMD46947453ST-21-0__bin.73	CIBIO	MAG	3021803	18	248042	43.03	99.33	0		0	46.9	0	17		GUT_GENOME000055	MGYG-HGUT-00018	Coprococcus eutactus	ERS436837	ERP005534	Germany	Europe	ftp://ftp.ebi.ac.uk/pub/databases/metagenomics/mgnify_genomes/human-gut/v1.0/all_genomes/MGYG-HGUT-000/MGYG-HGUT-00018/genomes1/GUT_GENOME286234.gff.gz		1
GUT_GENOME286283	ZellerG_2014__CCMD50071957ST-21-0__bin.3	CIBIO	MAG	3049862	31	178925	43.96	99.33	0		0	18.26	0	15		GUT_GENOME001379	MGYG-HGUT-00231	Coprococcus eutactus_A	ERS436833	ERP005534	Germany	Europe	ftp://ftp.ebi.ac.uk/pub/databases/metagenomics/mgnify_genomes/human-gut/v1.0/all_genomes/MGYG-HGUT-002/MGYG-HGUT-00231/genomes1/GUT_GENOME286283.gff.gz		2
GUT_GENOME286469	ZellerG_2014__CCMD64776337ST-21-0__bin.6	CIBIO	MAG	2618878	53	76311	41.53	98.66	0		0	0	0	18		GUT_GENOME001027	MGYG-HGUT-00189	Coprococcus sp900066115	ERS436807	ERP005534	Germany	Europe	ftp://ftp.ebi.ac.uk/pub/databases/metagenomics/mgnify_genomes/human-gut/v1.0/all_genomes/MGYG-HGUT-001/MGYG-HGUT-00189/genomes1/GUT_GENOME286469.gff.gz		4
GUT_GENOME286486	ZellerG_2014__CCMD72895164ST-21-0__bin.35	CIBIO	MAG	2731672	40	92111	44.42	97.32	0		0	9.26	0	17		GUT_GENOME001379	MGYG-HGUT-00231	Coprococcus eutactus_A	ERS436806	ERP005534	Germany	Europe	ftp://ftp.ebi.ac.uk/pub/databases/metagenomics/mgnify_genomes/human-gut/v1.0/all_genomes/MGYG-HGUT-002/MGYG-HGUT-00231/genomes2/GUT_GENOME286486.gff.gz		2
GUT_GENOME286555	ZellerG_2014__CCMD82866709ST-21-0__bin.17	CIBIO	MAG	2817511	21	332492	44.05	99.33	0.34		0	0	34.39	18		GUT_GENOME001379	MGYG-HGUT-00231	Coprococcus eutactus_A	ERS436803	ERP005534	Germany	Europe	ftp://ftp.ebi.ac.uk/pub/databases/metagenomics/mgnify_genomes/human-gut/v1.0/all_genomes/MGYG-HGUT-002/MGYG-HGUT-00231/genomes3/GUT_GENOME286555.gff.gz		2
GUT_GENOME286680	ZellerG_2014__CCMD87156761ST-21-0__bin.53	CIBIO	MAG	2794691	41	92451	44.27	98.57	0		0	0	0	17		GUT_GENOME001379	MGYG-HGUT-00231	Coprococcus eutactus_A	ERS436801	ERP005534	Germany	Europe	ftp://ftp.ebi.ac.uk/pub/databases/metagenomics/mgnify_genomes/human-gut/v1.0/all_genomes/MGYG-HGUT-002/MGYG-HGUT-00231/genomes2/GUT_GENOME286680.gff.gz		2
GUT_GENOME286968	ZellerG_2014__MMPU99077057ST__bin.13	CIBIO	MAG	3108718	50	130493	43.84	99.33	0.34		0	0	0	19		GUT_GENOME001379	MGYG-HGUT-00231	Coprococcus eutactus_A	ERS436838	ERP005534	Germany	Europe	ftp://ftp.ebi.ac.uk/pub/databases/metagenomics/mgnify_genomes/human-gut/v1.0/all_genomes/MGYG-HGUT-002/MGYG-HGUT-00231/genomes1/GUT_GENOME286968.gff.gz		2

## Sheet: Lachnoclostridium
Genome	Original_name	Study_set	Genome_type	Length	N_contigs	N50	GC_content	Completeness	Contamination	CMseq	rRNA_5S	rRNA_16S	rRNA_23S	tRNAs	Genome_accession	Species_rep	MGnify_accession	Lineage	Sample_accession	Study_accession	Country	Continent	FTP_download	strain	Cluster
GCF_000154365.1			Isolate	6557988	68	187711	49.06	99.32	0									Clostridium bolteae	SRS211921	PRJNA224116			ftp://ftp.ncbi.nlm.nih.gov/genomes/all/GCF/000/154/365/GCF_000154365.1_ASM15436v1	strain=ATCC BAA-613	1
GCF_000154505.1			Isolate	3622605	41	158586	46.35	99.42	0									Clostridium scindens	SRS211917	PRJNA224116			ftp://ftp.ncbi.nlm.nih.gov/genomes/all/GCF/000/154/505/GCF_000154505.1_ASM15450v1	strain=ATCC 35704	2
GCF_000156515.1			Isolate	3889859	123	2898417	48.85	98.44	0.29									Clostridium hylemonae	SRS010429	PRJNA224116			ftp://ftp.ncbi.nlm.nih.gov/genomes/all/GCF/000/156/515/GCF_000156515.1_ASM15651v1	strain=DSM 15053	3
GCF_000371645.1			Isolate	6482686	21	663201	48.62	99.32	0									Clostridium bolteae	SAMN02596757	PRJNA224116			ftp://ftp.ncbi.nlm.nih.gov/genomes/all/GCF/000/371/645/GCF_000371645.1_Clos_bolt_90B8_V1	strain=90B8	1
GCF_000371665.1			Isolate	6439235	19	799384	49.1	99.32	0									Clostridium bolteae	SAMN02596756	PRJNA224116			ftp://ftp.ncbi.nlm.nih.gov/genomes/all/GCF/000/371/665/GCF_000371665.1_Clos_bolt_90B7_V1	strain=90B7	1
GCF_000371685.1			Isolate	6538460	4	3794250	49.39	99.32	0									Clostridium bolteae	SAMN02596760	PRJNA224116			ftp://ftp.ncbi.nlm.nih.gov/genomes/all/GCF/000/371/685/GCF_000371685.1_Clos_bolt_90B3_V1	strain=90B3	1
GCF_000371705.1			Isolate	6377378	1	6377378	49.56	99.32	0									Clostridium bolteae	SAMN02596758	PRJNA224116			ftp://ftp.ncbi.nlm.nih.gov/genomes/all/GCF/000/371/705/GCF_000371705.1_Clos_bolt_90A9_V1	strain=90A9	1
GCF_000371725.1			Isolate	6421395	12	1978325	49.08	99.32	0									Clostridium bolteae	SAMN02596759	PRJNA224116			ftp://ftp.ncbi.nlm.nih.gov/genomes/all/GCF/000/371/725/GCF_000371725.1_Clos_bolt_90A5_V1	strain=90A5	1
GCF_001078425.1			Isolate	6604884	30	668224	49.05	99.32	0									Clostridium bolteae	SRS084531	PRJNA224116			ftp://ftp.ncbi.nlm.nih.gov/genomes/all/GCF/001/078/425/GCF_001078425.1_Clos_bolt_WAL_14578_V1	strain=WAL-14578	1
GCF_004295125.1			Isolate	3658040	1	3658040	46.23	99.42	1.17									Clostridium scindens	SRS4107464	PRJNA224116			ftp://ftp.ncbi.nlm.nih.gov/genomes/all/GCF/004/295/125/GCF_004295125.1_ASM429512v1	strain=ATCC 35704	2
GCF_005844135.1			Isolate	3794810	51	156653	48.95	98.83	0									Clostridium hylemonae	SAMN10863277	PRJNA224116	United States	North America	ftp://ftp.ncbi.nlm.nih.gov/genomes/all/GCF/005/844/135/GCF_005844135.1_ASM584413v1	strain=BSD2780061688st1_A6	3
GCF_005845085.1			Isolate	4763759	188	43651	47.86	99.37	0									Clostridium symbiosum	SAMN10863279	PRJNA224116	United States	North America	ftp://ftp.ncbi.nlm.nih.gov/genomes/all/GCF/005/845/085/GCF_005845085.1_ASM584508v1	strain=BSD2780061688st1_G6	4
GCF_008281175.1			Isolate	3833740	1	3833740	48.86	98.54	0									Clostridium hylemonae	SRS4652019	PRJNA224116			ftp://ftp.ncbi.nlm.nih.gov/genomes/all/GCF/008/281/175/GCF_008281175.1_ASM828117v1	strain=DSM 15053	3
GCF_008632235.1			Isolate	5072209	3	3271684	47.9	99.37	0									Clostridium symbiosum	SAMN12736038	PRJNA224116	Austria	Europe	ftp://ftp.ncbi.nlm.nih.gov/genomes/all/GCF/008/632/235/GCF_008632235.1_ASM863223v1	strain=LT0011	4
GCF_013300875.1			Isolate	4980001	154	51117	47.97	99.37	0									Clostridium symbiosum	SAMN14067756	PRJNA224116	United States	North America	ftp://ftp.ncbi.nlm.nih.gov/genomes/all/GCF/013/300/875/GCF_013300875.1_ASM1330087v1	strain=MSK.1.7	4
GCF_013303985.1			Isolate	5233888	208	46868	47.81	99.37	0									Clostridium symbiosum	SAMN14067591	PRJNA224116	United States	North America	ftp://ftp.ncbi.nlm.nih.gov/genomes/all/GCF/013/303/985/GCF_013303985.1_ASM1330398v1	strain=MSK.7.21	4
GCF_013304055.1			Isolate	4984011	159	51442	47.97	99.37	0									Clostridium symbiosum	SAMN14067590	PRJNA224116	United States	North America	ftp://ftp.ncbi.nlm.nih.gov/genomes/all/GCF/013/304/055/GCF_013304055.1_ASM1330405v1	strain=MSK.1.9	4
GCF_013304105.1			Isolate	3227039	91	114615	46.2	99.42	0									Clostridium scindens	SAMN14067588	PRJNA224116	United States	North America	ftp://ftp.ncbi.nlm.nih.gov/genomes/all/GCF/013/304/105/GCF_013304105.1_ASM1330410v1	strain=MSK.1.26	2
GCF_013304115.1			Isolate	3228416	89	106882	46.19	99.42	0									Clostridium scindens	SAMN14067587	PRJNA224116	United States	North America	ftp://ftp.ncbi.nlm.nih.gov/genomes/all/GCF/013/304/115/GCF_013304115.1_ASM1330411v1	strain=MSK.1.16	2
GCF_015547655.1			Isolate	4928109	215	36664	47.89	99.37	0									Clostridium symbiosum	SAMN15532413	PRJNA224116	United States	North America	ftp://ftp.ncbi.nlm.nih.gov/genomes/all/GCF/015/547/655/GCF_015547655.1_ASM1554765v1	strain=BSD2780120875b_170604_D12	4
GCF_015549025.1			Isolate	4975986	244	33880	47.79	98.73	0									Clostridium symbiosum	SAMN15532620	PRJNA224116	United States	North America	ftp://ftp.ncbi.nlm.nih.gov/genomes/all/GCF/015/549/025/GCF_015549025.1_ASM1554902v1	strain=D43t1_170807_G12	4
GCF_015550395.1			Isolate	3794810	51	156653	48.95	98.83	0									Clostridium hylemonae	SAMN15533160	PRJNA224116	United States	North America	ftp://ftp.ncbi.nlm.nih.gov/genomes/all/GCF/015/550/395/GCF_015550395.1_ASM1555039v1	strain=BSD2780061688b_171218_A6	3
GCF_015550435.1			Isolate	5090208	201	44546	47.73	99.37	0									Clostridium symbiosum	SAMN15533165	PRJNA224116	United States	North America	ftp://ftp.ncbi.nlm.nih.gov/genomes/all/GCF/015/550/435/GCF_015550435.1_ASM1555043v1	strain=D40t1_170626_G9	4
GCF_015553815.1			Isolate	5233337	144	69247	48.03	99.37	0									Clostridium symbiosum	SAMN15532450	PRJNA224116	United States	North America	ftp://ftp.ncbi.nlm.nih.gov/genomes/all/GCF/015/553/815/GCF_015553815.1_ASM1555381v1	strain=BSD2780061687b_171204_H4	4
GCF_015558605.1			Isolate	5161055	171	50830	47.52	99.37	0									Clostridium symbiosum	SAMN15532940	PRJNA224116	United States	North America	ftp://ftp.ncbi.nlm.nih.gov/genomes/all/GCF/015/558/605/GCF_015558605.1_ASM1555860v1	strain=1001302B_160321_E8	4
GCF_015558995.1			Isolate	4888234	122	70590	47.68	99.37	0.16									Clostridium symbiosum	SAMN15533298	PRJNA224116	United States	North America	ftp://ftp.ncbi.nlm.nih.gov/genomes/all/GCF/015/558/995/GCF_015558995.1_ASM1555899v1	strain=1001270B_150601_E4	4
GCF_015559085.1			Isolate	4763759	188	43651	47.86	99.37	0									Clostridium symbiosum	SAMN15532847	PRJNA224116	United States	North America	ftp://ftp.ncbi.nlm.nih.gov/genomes/all/GCF/015/559/085/GCF_015559085.1_ASM1555908v1	strain=BSD2780061688b_171218_G6	4
GCF_900111235.1			Isolate	4568183	48	228153	33.59	99.33	0.34									Clostridium fimetarium	SRS1686218	PRJNA224116	Rusia	Europe	ftp://ftp.ncbi.nlm.nih.gov/genomes/all/GCF/900/111/235/GCF_900111235.1_IMG-taxon_2675903166_annotated_assembly	strain=DSM 9179	5
GCF_900112775.1			Isolate	4222819	44	266643	36.04	98.66	1.23									Clostridium populeti	SRS1667865	PRJNA224116			ftp://ftp.ncbi.nlm.nih.gov/genomes/all/GCF/900/112/775/GCF_900112775.1_IMG-taxon_2599185221_annotated_assembly	strain=743A	6
GCF_900240245.1			Isolate	3329949	6	3320486	42.49	99.37	0.63									Lachnoclostridium edouardi	ERS2032287	PRJNA224116			ftp://ftp.ncbi.nlm.nih.gov/genomes/all/GCF/900/240/245/GCF_900240245.1_PRJEB23758	strain=Marseille-P3397	7
GCF_900625025.1			Isolate	3125999	38	297900	55.45	97.61	1.26									Lachnoclostridium sp. Marseille-P6806	ERS2915463	PRJNA224116			ftp://ftp.ncbi.nlm.nih.gov/genomes/all/GCF/900/625/025/GCF_900625025.1_PRJEB28801	strain=Marseille-P6806	8
GCF_902167935.1			Isolate	5266075	278	35722	47.92	99.37	0									Clostridium symbiosum	ERS3575044	PRJNA224116			ftp://ftp.ncbi.nlm.nih.gov/genomes/all/GCF/902/167/935/GCF_902167935.1_Clostridium_symbiosum_TS_8243C_mod2		4
GCF_902373645.1			Isolate	3622605	41	158586	46.35	99.42	0									Clostridium scindens	ERS3639333	PRJNA224116			ftp://ftp.ncbi.nlm.nih.gov/genomes/all/GCF/902/373/645/GCF_902373645.1_MGYG-HGUT-01303		2
GCF_902374315.1			Isolate	4916964	55	628413	48.17	99.37	0									Clostridium symbiosum	ERS3639397	PRJNA224116			ftp://ftp.ncbi.nlm.nih.gov/genomes/all/GCF/902/374/315/GCF_902374315.1_MGYG-HGUT-01367		4
GCF_902377585.1			Isolate	3802096	118	64368	48.84	98.83	0									Clostridium hylemonae	ERS3639740	PRJNA224116	Japan	Asia	ftp://ftp.ncbi.nlm.nih.gov/genomes/all/GCF/902/377/585/GCF_902377585.1_MGYG-HGUT-01710		3
GCF_902386895.1			Isolate	3329949	6	3320486	42.49	99.37	0.63									Lachnoclostridium edouardi	ERS3640447	PRJNA224116			ftp://ftp.ncbi.nlm.nih.gov/genomes/all/GCF/902/386/895/GCF_902386895.1_UHGG_MGYG-HGUT-02417		7
GUT_GENOME000016	11861_6_93	HBC	Isolate	5574374	167	79390	49.03	99.32	0		82.35	99.61	99.76	20		GUT_GENOME096228	MGYG-HGUT-01386	Clostridium clostridioforme	ERS370057	ERP105624	United Kingdom	Europe	ftp://ftp.ebi.ac.uk/pub/databases/metagenomics/mgnify_genomes/human-gut/v1.0/all_genomes/MGYG-HGUT-013/MGYG-HGUT-01386/genomes1/GUT_GENOME000016.gff.gz		9
[truncated: 234 more rows]
