# Supplementary material for: Circulating Levels of the Short-Chain Fatty Acid Acetate Mediate the Effect of the Gut Microbiome on Visceral Fat
Source: Front Microbiol. 2021 Jul 15;12:711359. doi: 10.3389/fmicb.2021.711359 (PMC8320334; doi:10.3389/fmicb.2021.711359)
Supplement: Supplementary Tables 2, 3, 4 — Average nucleotide identity (ANI) values obtained for each pair of genomes belonging to Lachnoclostridium and Coprococcus using FastANI. Previously, genomes were filtered by alignment fraction (>0.4). [file Table_2.XLSX]

## Sheet: Lachnoclostridium
Query	Reference	ANI	Count_bidirectional_fragment_mappings	Total_query_fragments	Alignment_fraction
GCF_000018685.1	GCF_000018685.1	100	1615	1615	1
GCF_000018685.1	GCF_000733755.1	84.1104	976	1615	0.604334
GCF_000018685.1	GCF_000703105.1	84.0053	1023	1615	0.633437
GCF_000018685.1	GCF_000702985.1	83.9876	1018	1615	0.630341
GCF_000154365.1	GCF_000154365.1	100	2150	2153	0.998607
GCF_000154365.1	GCF_001078425.1	99.9791	2141	2153	0.994426
GCF_000154365.1	GCF_000371725.1	99.8541	2033	2153	0.944264
GCF_000154365.1	GCF_000371665.1	99.854	2032	2153	0.943799
GCF_000154365.1	GCF_000371645.1	98.8717	1786	2153	0.82954
GCF_000154365.1	GCF_000371685.1	97.0566	1720	2153	0.798885
GCF_000154365.1	GCF_000371705.1	97.0312	1704	2153	0.791454
GCF_000154505.1	GCF_902373645.1	100	1180	1185	0.995781
GCF_000154505.1	GCF_000154505.1	100	1180	1185	0.995781
GCF_000154505.1	GCF_004295125.1	99.9846	1171	1185	0.988186
GCF_000154505.1	GCF_013304105.1	99.2164	919	1185	0.775527
GCF_000154505.1	GCF_013304115.1	99.2071	917	1185	0.77384
GCF_000154505.1	GCF_013304085.1	94.9258	803	1185	0.677637
GCF_000154505.1	GCF_000471845.1	94.7907	767	1185	0.647257
GCF_000156515.1	GCF_000156515.1	100	1270	1270	1
GCF_000156515.1	GCF_008281175.1	99.9503	1263	1270	0.994488
GCF_000156515.1	GCF_902377585.1	99.9419	1198	1270	0.943307
GCF_000156515.1	GCF_015550395.1	98.4332	1148	1270	0.903937
GCF_000156515.1	GCF_005844135.1	98.4332	1148	1270	0.903937
GCF_000371645.1	GCF_000371645.1	99.9961	2144	2150	0.997209
GCF_000371645.1	GCF_000371725.1	98.9085	1792	2150	0.833488
GCF_000371645.1	GCF_000371665.1	98.8715	1787	2150	0.831163
GCF_000371645.1	GCF_000154365.1	98.8714	1779	2150	0.827442
GCF_000371645.1	GCF_001078425.1	98.8454	1799	2150	0.836744
GCF_000371645.1	GCF_000371685.1	96.9547	1707	2150	0.793953
GCF_000371645.1	GCF_000371705.1	96.9545	1686	2150	0.784186
GCF_000371665.1	GCF_000371665.1	99.993	2121	2136	0.992978
GCF_000371665.1	GCF_000371725.1	99.9338	2098	2136	0.98221
GCF_000371665.1	GCF_001078425.1	99.8256	2068	2136	0.968165
GCF_000371665.1	GCF_000154365.1	99.8157	2024	2136	0.947566
GCF_000371665.1	GCF_000371645.1	98.9063	1786	2136	0.836142
GCF_000371665.1	GCF_000371685.1	97.0906	1731	2136	0.810393
GCF_000371665.1	GCF_000371705.1	97.0882	1741	2136	0.815075
GCF_000371685.1	GCF_000371685.1	99.9968	2159	2177	0.991732
GCF_000371685.1	GCF_000371705.1	99.8553	2056	2177	0.944419
GCF_000371685.1	GCF_000371725.1	97.1314	1729	2177	0.794212
GCF_000371685.1	GCF_000371665.1	97.1233	1727	2177	0.793294
GCF_000371685.1	GCF_000154365.1	97.0762	1701	2177	0.78135
GCF_000371685.1	GCF_001078425.1	97.0625	1724	2177	0.791915
GCF_000371685.1	GCF_000371645.1	96.921	1697	2177	0.779513
GCF_000371705.1	GCF_000371705.1	99.9956	2124	2125	0.999529
GCF_000371705.1	GCF_000371685.1	99.8347	2054	2125	0.966588
GCF_000371705.1	GCF_000371665.1	97.1407	1737	2125	0.817412
GCF_000371705.1	GCF_000371725.1	97.088	1740	2125	0.818824
GCF_000371705.1	GCF_001078425.1	97.0279	1722	2125	0.810353
GCF_000371705.1	GCF_000154365.1	97.0002	1707	2125	0.803294
GCF_000371705.1	GCF_000371645.1	96.9672	1682	2125	0.791529
GCF_000371725.1	GCF_000371725.1	99.9988	2130	2135	0.997658
GCF_000371725.1	GCF_000371665.1	99.9312	2086	2135	0.977049
GCF_000371725.1	GCF_001078425.1	99.8587	2063	2135	0.966276
GCF_000371725.1	GCF_000154365.1	99.8446	2027	2135	0.949415
GCF_000371725.1	GCF_000371645.1	98.8533	1793	2135	0.839813
GCF_000371725.1	GCF_000371685.1	97.0989	1723	2135	0.807026
GCF_000371725.1	GCF_000371705.1	97.0951	1738	2135	0.814052
GCF_000421505.1	GCF_000421505.1	100	2348	2355	0.997028
GCF_000421505.1	GCF_000526995.1	99.1817	1964	2355	0.83397
GCF_000421505.1	GCF_002797975.1	85.2985	1318	2355	0.55966
GCF_000471845.1	GCF_000471845.1	100	1252	1262	0.992076
GCF_000471845.1	GCF_013304085.1	98.5816	1160	1262	0.919176
GCF_000471845.1	GCF_000154505.1	94.7967	777	1262	0.615689
GCF_000471845.1	GCF_902373645.1	94.7967	777	1262	0.615689
GCF_000471845.1	GCF_004295125.1	94.7714	783	1262	0.620444
GCF_000471845.1	GCF_013304105.1	94.7055	777	1262	0.615689
GCF_000471845.1	GCF_013304115.1	94.6953	777	1262	0.615689
GCF_000526995.1	GCF_000526995.1	100	2127	2127	1
GCF_000526995.1	GCF_000421505.1	99.2452	1960	2127	0.921486
GCF_000526995.1	GCF_002797975.1	85.4005	1364	2127	0.641279
GCF_000687555.1	GCF_000687555.1	100	1547	1551	0.997421
GCF_000702985.1	GCF_000702985.1	100	1569	1570	0.999363
GCF_000702985.1	GCF_000703105.1	99.996	1569	1570	0.999363
GCF_000702985.1	GCF_000733755.1	99.9907	1495	1570	0.952229
GCF_000702985.1	GCF_000018685.1	83.926	1036	1570	0.659873
GCF_000703105.1	GCF_000703105.1	100	1570	1570	1
GCF_000703105.1	GCF_000702985.1	99.9963	1570	1570	1
GCF_000703105.1	GCF_000733755.1	99.9951	1494	1570	0.951592
GCF_000703105.1	GCF_000018685.1	83.9282	1036	1570	0.659873
GCF_000733755.1	GCF_000733755.1	100	1532	1532	1
GCF_000733755.1	GCF_000702985.1	99.9968	1495	1532	0.975849
GCF_000733755.1	GCF_000703105.1	99.9956	1496	1532	0.976501
GCF_000733755.1	GCF_000018685.1	84.0545	983	1532	0.641645
GCF_001078425.1	GCF_001078425.1	99.9999	2186	2188	0.999086
GCF_001078425.1	GCF_000154365.1	99.9678	2126	2188	0.971664
GCF_001078425.1	GCF_000371725.1	99.8479	2065	2188	0.943784
GCF_001078425.1	GCF_000371665.1	99.8377	2070	2188	0.946069
GCF_001078425.1	GCF_000371645.1	98.859	1810	2188	0.827239
GCF_001078425.1	GCF_000371685.1	97.1099	1730	2188	0.790676
GCF_001078425.1	GCF_000371705.1	97.0215	1716	2188	0.784278
GCF_002797975.1	GCF_002797975.1	100	1757	1757	1
GCF_002797975.1	GCF_000526995.1	85.5276	1339	1757	0.762094
GCF_002797975.1	GCF_000421505.1	85.462	1313	1757	0.747297
GCF_004295125.1	GCF_004295125.1	100	1210	1219	0.992617
GCF_004295125.1	GCF_000154505.1	99.9647	1168	1219	0.958162
GCF_004295125.1	GCF_902373645.1	99.9647	1168	1219	0.958162
GCF_004295125.1	GCF_013304105.1	99.1518	923	1219	0.757178
GCF_004295125.1	GCF_013304115.1	99.1363	923	1219	0.757178
GCF_004295125.1	GCF_013304085.1	94.9219	812	1219	0.66612
GCF_004295125.1	GCF_000471845.1	94.8501	772	1219	0.633306
GCF_005844135.1	GCF_005844135.1	100	1237	1239	0.998386
GCF_005844135.1	GCF_015550395.1	100	1237	1239	0.998386
GCF_005844135.1	GCF_000156515.1	98.4481	1154	1239	0.931396
GCF_005844135.1	GCF_902377585.1	98.4263	1106	1239	0.892655
GCF_005844135.1	GCF_008281175.1	98.4248	1156	1239	0.93301
GCF_005845085.1	GCF_005845085.1	100	1490	1498	0.99466
GCF_005845085.1	GCF_015559085.1	100	1490	1498	0.99466
GCF_005845085.1	GCF_015547655.1	99.4031	1292	1498	0.862483
GCF_005845085.1	GCF_015549025.1	99.3725	1302	1498	0.869159
GCF_005845085.1	GCF_902374315.1	99.3269	1363	1498	0.90988
GCF_005845085.1	GCF_902167935.1	99.1184	1278	1498	0.853138
GCF_005845085.1	GCF_015550435.1	99.0926	1297	1498	0.865821
GCF_005845085.1	GCF_008632235.1	99.0271	1306	1498	0.871829
GCF_005845085.1	GCF_015553815.1	99.0182	1262	1498	0.842457
GCF_005845085.1	GCF_013300875.1	98.9959	1261	1498	0.841789
GCF_005845085.1	GCF_013304055.1	98.9894	1266	1498	0.845127
GCF_005845085.1	GCF_015558995.1	98.9515	1266	1498	0.845127
GCF_005845085.1	GCF_015558605.1	98.9077	1271	1498	0.848465
GCF_005845085.1	GCF_013303985.1	98.7241	1274	1498	0.850467
GCF_008281175.1	GCF_008281175.1	100	1277	1277	1
GCF_008281175.1	GCF_000156515.1	99.9455	1266	1277	0.991386
GCF_008281175.1	GCF_902377585.1	99.9288	1194	1277	0.935004
GCF_008281175.1	GCF_015550395.1	98.4364	1155	1277	0.904464
GCF_008281175.1	GCF_005844135.1	98.4364	1155	1277	0.904464
GCF_008632235.1	GCF_008632235.1	100	1689	1689	1
GCF_008632235.1	GCF_013304055.1	99.1451	1388	1689	0.821788
GCF_008632235.1	GCF_013300875.1	99.125	1390	1689	0.822972
GCF_008632235.1	GCF_015550435.1	99.0507	1328	1689	0.786264
GCF_008632235.1	GCF_015549025.1	98.995	1292	1689	0.76495
GCF_008632235.1	GCF_005845085.1	98.9698	1289	1689	0.763173
GCF_008632235.1	GCF_015559085.1	98.9698	1289	1689	0.763173
GCF_008632235.1	GCF_015558995.1	98.9559	1369	1689	0.810539
GCF_008632235.1	GCF_013303985.1	98.9508	1340	1689	0.793369
GCF_008632235.1	GCF_902167935.1	98.9327	1304	1689	0.772054
GCF_008632235.1	GCF_015558605.1	98.9222	1351	1689	0.799882
GCF_008632235.1	GCF_015547655.1	98.8411	1320	1689	0.781528
GCF_008632235.1	GCF_902374315.1	98.8267	1402	1689	0.830077
GCF_008632235.1	GCF_015553815.1	98.7452	1368	1689	0.809947
GCF_013300875.1	GCF_013300875.1	100	1574	1582	0.994943
GCF_013300875.1	GCF_013304055.1	99.9954	1563	1582	0.98799
GCF_013300875.1	GCF_008632235.1	99.1951	1391	1582	0.879267
GCF_013300875.1	GCF_015558995.1	99.1659	1348	1582	0.852086
GCF_013300875.1	GCF_015550435.1	99.0591	1303	1582	0.823641
GCF_013300875.1	GCF_015547655.1	98.9769	1271	1582	0.803413
GCF_013300875.1	GCF_902167935.1	98.9556	1284	1582	0.811631
GCF_013300875.1	GCF_015558605.1	98.9553	1316	1582	0.831858
GCF_013300875.1	GCF_005845085.1	98.9415	1274	1582	0.80531
GCF_013300875.1	GCF_015559085.1	98.9415	1274	1582	0.80531
GCF_013300875.1	GCF_902374315.1	98.9415	1338	1582	0.845765
GCF_013300875.1	GCF_015553815.1	98.8905	1329	1582	0.840076
GCF_013300875.1	GCF_015549025.1	98.8304	1296	1582	0.819216
GCF_013300875.1	GCF_013303985.1	98.7584	1336	1582	0.844501
GCF_013303985.1	GCF_013303985.1	100	1639	1650	0.993333
GCF_013303985.1	GCF_008632235.1	99.0642	1354	1650	0.820606
GCF_013303985.1	GCF_015558995.1	98.9499	1306	1650	0.791515
GCF_013303985.1	GCF_005845085.1	98.8962	1271	1650	0.770303
GCF_013303985.1	GCF_015559085.1	98.8962	1271	1650	0.770303
GCF_013303985.1	GCF_015553815.1	98.8949	1337	1650	0.810303
GCF_013303985.1	GCF_015547655.1	98.8315	1259	1650	0.76303
GCF_013303985.1	GCF_902374315.1	98.793	1328	1650	0.804848
GCF_013303985.1	GCF_015549025.1	98.7642	1290	1650	0.781818
GCF_013303985.1	GCF_013300875.1	98.7437	1338	1650	0.810909
GCF_013303985.1	GCF_015558605.1	98.7432	1327	1650	0.804242
GCF_013303985.1	GCF_013304055.1	98.7262	1337	1650	0.810303
GCF_013303985.1	GCF_902167935.1	98.7168	1342	1650	0.813333
GCF_013303985.1	GCF_015550435.1	98.6496	1331	1650	0.806667
GCF_013304055.1	GCF_013304055.1	100	1572	1584	0.992424
GCF_013304055.1	GCF_013300875.1	99.9967	1558	1584	0.983586
GCF_013304055.1	GCF_008632235.1	99.173	1394	1584	0.880051
GCF_013304055.1	GCF_015558995.1	99.1694	1347	1584	0.850379
GCF_013304055.1	GCF_015550435.1	99.0652	1298	1584	0.819444
GCF_013304055.1	GCF_015558605.1	98.987	1315	1584	0.830177
GCF_013304055.1	GCF_902374315.1	98.9857	1337	1584	0.844066
GCF_013304055.1	GCF_015547655.1	98.9779	1269	1584	0.801136
GCF_013304055.1	GCF_015559085.1	98.9511	1268	1584	0.800505
GCF_013304055.1	GCF_005845085.1	98.9511	1268	1584	0.800505
GCF_013304055.1	GCF_902167935.1	98.929	1283	1584	0.809975
GCF_013304055.1	GCF_015553815.1	98.8924	1327	1584	0.837753
GCF_013304055.1	GCF_015549025.1	98.8371	1292	1584	0.815657
GCF_013304055.1	GCF_013303985.1	98.6858	1340	1584	0.84596
GCF_013304085.1	GCF_013304085.1	100	1345	1347	0.998515
GCF_013304085.1	GCF_000471845.1	98.5048	1151	1347	0.854491
GCF_013304085.1	GCF_013304105.1	94.9181	800	1347	0.593912
GCF_013304085.1	GCF_013304115.1	94.8938	800	1347	0.593912
GCF_013304085.1	GCF_004295125.1	94.7179	827	1347	0.613957
GCF_013304085.1	GCF_902373645.1	94.6885	819	1347	0.608018
GCF_013304085.1	GCF_000154505.1	94.6885	819	1347	0.608018
GCF_013304105.1	GCF_013304105.1	100	1029	1032	0.997093
GCF_013304105.1	GCF_013304115.1	99.9971	1027	1032	0.995155
GCF_013304105.1	GCF_000154505.1	99.2339	916	1032	0.887597
GCF_013304105.1	GCF_902373645.1	99.2339	916	1032	0.887597
GCF_013304105.1	GCF_004295125.1	99.1864	925	1032	0.896318
GCF_013304105.1	GCF_013304085.1	94.9128	782	1032	0.757752
GCF_013304105.1	GCF_000471845.1	94.8073	764	1032	0.74031
GCF_013304115.1	GCF_013304115.1	100	1030	1031	0.99903
GCF_013304115.1	GCF_013304105.1	99.9968	1021	1031	0.990301
GCF_013304115.1	GCF_000154505.1	99.2642	912	1031	0.884578
GCF_013304115.1	GCF_902373645.1	99.2642	912	1031	0.884578
GCF_013304115.1	GCF_004295125.1	99.1843	927	1031	0.899127
GCF_013304115.1	GCF_013304085.1	95.0014	779	1031	0.755577
GCF_013304115.1	GCF_000471845.1	94.8804	759	1031	0.736178
GCF_015547655.1	GCF_015547655.1	99.9999	1519	1532	0.991514
GCF_015547655.1	GCF_005845085.1	99.4137	1286	1532	0.839426
GCF_015547655.1	GCF_015559085.1	99.4137	1286	1532	0.839426
GCF_015547655.1	GCF_902374315.1	99.3235	1350	1532	0.881201
GCF_015547655.1	GCF_015549025.1	99.288	1306	1532	0.85248
GCF_015547655.1	GCF_015550435.1	99.0833	1307	1532	0.853133
GCF_015547655.1	GCF_013300875.1	99.0432	1260	1532	0.822454
GCF_015547655.1	GCF_013304055.1	99.0391	1254	1532	0.818538
GCF_015547655.1	GCF_902167935.1	99.0012	1306	1532	0.85248
GCF_015547655.1	GCF_015558995.1	98.9963	1281	1532	0.836162
GCF_015547655.1	GCF_008632235.1	98.9069	1339	1532	0.874021
GCF_015547655.1	GCF_015553815.1	98.889	1271	1532	0.829634
GCF_015547655.1	GCF_015558605.1	98.8775	1273	1532	0.83094
GCF_015547655.1	GCF_013303985.1	98.7408	1250	1532	0.815927
GCF_015549025.1	GCF_015549025.1	100	1527	1541	0.990915
GCF_015549025.1	GCF_005845085.1	99.4355	1304	1541	0.846204
GCF_015549025.1	GCF_015559085.1	99.4355	1304	1541	0.846204
GCF_015549025.1	GCF_902374315.1	99.4025	1391	1541	0.902661
GCF_015549025.1	GCF_015547655.1	99.2596	1307	1541	0.848151
GCF_015549025.1	GCF_008632235.1	99.0441	1306	1541	0.847502
GCF_015549025.1	GCF_902167935.1	99.0219	1294	1541	0.839714
GCF_015549025.1	GCF_015558995.1	99.0171	1264	1541	0.820247
GCF_015549025.1	GCF_015550435.1	98.9199	1327	1541	0.861129
GCF_015549025.1	GCF_013304055.1	98.8894	1280	1541	0.830629
GCF_015549025.1	GCF_013300875.1	98.8865	1286	1541	0.834523
GCF_015549025.1	GCF_015553815.1	98.8795	1293	1541	0.839066
GCF_015549025.1	GCF_015558605.1	98.7255	1286	1541	0.834523
GCF_015549025.1	GCF_013303985.1	98.6318	1295	1541	0.840363
GCF_015550395.1	GCF_015550395.1	100	1237	1239	0.998386
GCF_015550395.1	GCF_005844135.1	100	1237	1239	0.998386
GCF_015550395.1	GCF_000156515.1	98.4481	1154	1239	0.931396
GCF_015550395.1	GCF_902377585.1	98.4263	1106	1239	0.892655
GCF_015550395.1	GCF_008281175.1	98.4248	1156	1239	0.93301
GCF_015550435.1	GCF_015550435.1	100	1593	1603	0.993762
GCF_015550435.1	GCF_902167935.1	99.2377	1357	1603	0.846538
GCF_015550435.1	GCF_013304055.1	99.1337	1301	1603	0.811603
GCF_015550435.1	GCF_013300875.1	99.1299	1300	1603	0.810979
GCF_015550435.1	GCF_008632235.1	99.0851	1352	1603	0.843419
GCF_015550435.1	GCF_015547655.1	99.0497	1313	1603	0.819089
GCF_015550435.1	GCF_005845085.1	99.042	1304	1603	0.813475
GCF_015550435.1	GCF_015559085.1	99.042	1304	1603	0.813475
GCF_015550435.1	GCF_902374315.1	99.0405	1362	1603	0.849657
GCF_015550435.1	GCF_015558995.1	99.0298	1301	1603	0.811603
GCF_015550435.1	GCF_015549025.1	98.9579	1329	1603	0.82907
GCF_015550435.1	GCF_015553815.1	98.8906	1325	1603	0.826575
GCF_015550435.1	GCF_015558605.1	98.8583	1311	1603	0.817842
GCF_015550435.1	GCF_013303985.1	98.6463	1316	1603	0.820961
GCF_015553815.1	GCF_015553815.1	100	1660	1670	0.994012
GCF_015553815.1	GCF_005845085.1	99.0404	1268	1670	0.759281
GCF_015553815.1	GCF_015559085.1	99.0404	1268	1670	0.759281
GCF_015553815.1	GCF_015549025.1	98.9142	1285	1670	0.769461
GCF_015553815.1	GCF_902374315.1	98.9034	1366	1670	0.817964
GCF_015553815.1	GCF_013303985.1	98.8989	1336	1670	0.8
GCF_015553815.1	GCF_015558605.1	98.888	1313	1670	0.786228
GCF_015553815.1	GCF_902167935.1	98.885	1361	1670	0.81497
GCF_015553815.1	GCF_015547655.1	98.879	1260	1670	0.754491
GCF_015553815.1	GCF_015550435.1	98.8411	1334	1670	0.798802
GCF_015553815.1	GCF_013300875.1	98.8385	1328	1670	0.79521
GCF_015553815.1	GCF_013304055.1	98.8074	1332	1670	0.797605
GCF_015553815.1	GCF_015558995.1	98.8013	1328	1670	0.79521
GCF_015553815.1	GCF_008632235.1	98.7804	1378	1670	0.82515
GCF_015558605.1	GCF_015558605.1	100	1615	1628	0.992015
GCF_015558605.1	GCF_013300875.1	99.0086	1304	1628	0.800983
GCF_015558605.1	GCF_013304055.1	98.9961	1304	1628	0.800983
GCF_015558605.1	GCF_008632235.1	98.9418	1342	1628	0.824324
GCF_015558605.1	GCF_015558995.1	98.9141	1312	1628	0.805897
GCF_015558605.1	GCF_015550435.1	98.84	1316	1628	0.808354
GCF_015558605.1	GCF_902374315.1	98.8399	1303	1628	0.800369
GCF_015558605.1	GCF_902167935.1	98.8052	1315	1628	0.80774
GCF_015558605.1	GCF_015547655.1	98.7318	1265	1628	0.777027
GCF_015558605.1	GCF_015559085.1	98.7295	1271	1628	0.780713
GCF_015558605.1	GCF_005845085.1	98.7295	1271	1628	0.780713
GCF_015558605.1	GCF_015553815.1	98.7007	1335	1628	0.820025
GCF_015558605.1	GCF_013303985.1	98.6373	1302	1628	0.799754
GCF_015558605.1	GCF_015549025.1	98.6208	1286	1628	0.789926
GCF_015558995.1	GCF_015558995.1	100	1553	1562	0.994238
GCF_015558995.1	GCF_013304055.1	99.1587	1324	1562	0.847631
GCF_015558995.1	GCF_013300875.1	99.1581	1331	1562	0.852113
GCF_015558995.1	GCF_008632235.1	99.0546	1365	1562	0.87388
GCF_015558995.1	GCF_015550435.1	98.9941	1292	1562	0.827145
GCF_015558995.1	GCF_902374315.1	98.9737	1327	1562	0.849552
GCF_015558995.1	GCF_015549025.1	98.9661	1270	1562	0.81306
GCF_015558995.1	GCF_015547655.1	98.9306	1270	1562	0.81306
GCF_015558995.1	GCF_005845085.1	98.9096	1262	1562	0.807939
GCF_015558995.1	GCF_015559085.1	98.9096	1262	1562	0.807939
GCF_015558995.1	GCF_902167935.1	98.9083	1270	1562	0.81306
GCF_015558995.1	GCF_015558605.1	98.9023	1309	1562	0.838028
GCF_015558995.1	GCF_013303985.1	98.8684	1284	1562	0.822023
GCF_015558995.1	GCF_015553815.1	98.8302	1330	1562	0.851472
GCF_015559085.1	GCF_005845085.1	100	1490	1498	0.99466
GCF_015559085.1	GCF_015559085.1	100	1490	1498	0.99466
GCF_015559085.1	GCF_015547655.1	99.4031	1292	1498	0.862483
GCF_015559085.1	GCF_015549025.1	99.3725	1302	1498	0.869159
GCF_015559085.1	GCF_902374315.1	99.3269	1363	1498	0.90988
GCF_015559085.1	GCF_902167935.1	99.1184	1278	1498	0.853138
GCF_015559085.1	GCF_015550435.1	99.0926	1297	1498	0.865821
GCF_015559085.1	GCF_008632235.1	99.0271	1306	1498	0.871829
GCF_015559085.1	GCF_015553815.1	99.0182	1262	1498	0.842457
GCF_015559085.1	GCF_013300875.1	98.9959	1261	1498	0.841789
GCF_015559085.1	GCF_013304055.1	98.9894	1266	1498	0.845127
GCF_015559085.1	GCF_015558995.1	98.9515	1266	1498	0.845127
GCF_015559085.1	GCF_015558605.1	98.9077	1271	1498	0.848465
GCF_015559085.1	GCF_013303985.1	98.7241	1274	1498	0.850467
GCF_900111235.1	GCF_900111235.1	100	1493	1497	0.997328
GCF_900111595.1	GCF_900111595.1	99.9946	1124	1129	0.995571
GCF_900112775.1	GCF_900112775.1	100	1383	1386	0.997835
GCF_900120345.1	GCF_900120345.1	100	1166	1166	1
GCF_900240245.1	GCF_900240245.1	100	1104	1107	0.99729
GCF_900240245.1	GCF_902386895.1	100	1104	1107	0.99729
GCF_900566185.1	GCF_900566185.1	100	879	881	0.99773
GCF_900625025.1	GCF_900625025.1	100	1018	1021	0.997062
GCF_902167935.1	GCF_902167935.1	100	1609	1624	0.990764
GCF_902167935.1	GCF_015550435.1	99.2905	1362	1624	0.83867
GCF_902167935.1	GCF_015559085.1	99.0389	1304	1624	0.802956
GCF_902167935.1	GCF_005845085.1	99.0389	1304	1624	0.802956
GCF_902167935.1	GCF_015558995.1	98.9786	1276	1624	0.785714
GCF_902167935.1	GCF_015547655.1	98.9578	1315	1624	0.809729
GCF_902167935.1	GCF_008632235.1	98.9482	1319	1624	0.812192
GCF_902167935.1	GCF_013304055.1	98.9362	1293	1624	0.796182
GCF_902167935.1	GCF_013300875.1	98.9319	1288	1624	0.793103
GCF_902167935.1	GCF_015549025.1	98.9094	1315	1624	0.809729
GCF_902167935.1	GCF_015558605.1	98.8918	1327	1624	0.817118
GCF_902167935.1	GCF_902374315.1	98.8889	1335	1624	0.822044
GCF_902167935.1	GCF_015553815.1	98.8855	1377	1624	0.847906
GCF_902167935.1	GCF_013303985.1	98.684	1341	1624	0.825739
GCF_902373645.1	GCF_902373645.1	100	1180	1185	0.995781
GCF_902373645.1	GCF_000154505.1	100	1180	1185	0.995781
GCF_902373645.1	GCF_004295125.1	99.9846	1171	1185	0.988186
GCF_902373645.1	GCF_013304105.1	99.2164	919	1185	0.775527
GCF_902373645.1	GCF_013304115.1	99.2071	917	1185	0.77384
GCF_902373645.1	GCF_013304085.1	94.9258	803	1185	0.677637
GCF_902373645.1	GCF_000471845.1	94.7907	767	1185	0.647257
GCF_902374315.1	GCF_902374315.1	99.9999	1609	1611	0.998759
GCF_902374315.1	GCF_005845085.1	99.3592	1326	1611	0.823091
GCF_902374315.1	GCF_015559085.1	99.3592	1326	1611	0.823091
GCF_902374315.1	GCF_015549025.1	99.2924	1371	1611	0.851024
GCF_902374315.1	GCF_015547655.1	99.2553	1333	1611	0.827436
GCF_902374315.1	GCF_015550435.1	98.9825	1338	1611	0.83054
GCF_902374315.1	GCF_013304055.1	98.9801	1322	1611	0.820608
GCF_902374315.1	GCF_013300875.1	98.959	1325	1611	0.822471
GCF_902374315.1	GCF_015558995.1	98.9536	1320	1611	0.819367
GCF_902374315.1	GCF_902167935.1	98.9226	1315	1611	0.816263
GCF_902374315.1	GCF_015553815.1	98.8673	1349	1611	0.837368
GCF_902374315.1	GCF_015558605.1	98.8064	1299	1611	0.806331
GCF_902374315.1	GCF_008632235.1	98.7778	1402	1611	0.870267
GCF_902374315.1	GCF_013303985.1	98.6878	1309	1611	0.812539
GCF_902377585.1	GCF_902377585.1	100	1207	1214	0.994234
GCF_902377585.1	GCF_000156515.1	99.9947	1213	1214	0.999176
GCF_902377585.1	GCF_008281175.1	99.9758	1214	1214	1
GCF_902377585.1	GCF_015550395.1	98.4423	1117	1214	0.920099
GCF_902377585.1	GCF_005844135.1	98.4423	1117	1214	0.920099
GCF_902386895.1	GCF_902386895.1	100	1104	1107	0.99729
GCF_902386895.1	GCF_900240245.1	100	1104	1107	0.99729
GUT_GENOME000016	GUT_GENOME000016	100	1797	1805	0.995568
GUT_GENOME000016	GUT_GENOME256003	99.8718	1500	1805	0.831025
GUT_GENOME000016	GUT_GENOME122019	99.7924	1431	1805	0.792798
GUT_GENOME000016	GUT_GENOME107090	99.7785	1412	1805	0.782271
GUT_GENOME000016	GUT_GENOME243801	99.7551	1384	1805	0.766759
GUT_GENOME000016	GUT_GENOME120250	99.7443	1553	1805	0.860388
GUT_GENOME000016	GUT_GENOME096487	99.7173	1687	1805	0.934626
GUT_GENOME000016	GUT_GENOME020409	99.7083	1260	1805	0.698061
GUT_GENOME000016	GUT_GENOME005956	99.6991	1181	1805	0.654294
GUT_GENOME000016	GUT_GENOME176873	99.6947	1394	1805	0.772299
GUT_GENOME000016	GUT_GENOME170020	99.6879	1234	1805	0.683657
GUT_GENOME000016	GUT_GENOME055234	99.5999	1260	1805	0.698061
GUT_GENOME000016	GUT_GENOME120132	99.5366	1384	1805	0.766759
GUT_GENOME000016	GUT_GENOME120028	99.5025	1252	1805	0.693629
GUT_GENOME000016	GUT_GENOME096228	99.4856	1599	1805	0.885873
GUT_GENOME000016	GUT_GENOME148802	99.4816	1328	1805	0.735734
GUT_GENOME000016	GUT_GENOME167970	99.4656	1225	1805	0.67867
GUT_GENOME000016	GUT_GENOME045747	99.44	1359	1805	0.752909
GUT_GENOME000016	GUT_GENOME136562	99.4278	1477	1805	0.818283
GUT_GENOME000016	GUT_GENOME168104	99.4095	1354	1805	0.750139
GUT_GENOME000016	GUT_GENOME029519	99.3617	1364	1805	0.755679
GUT_GENOME000016	GUT_GENOME166270	99.3285	1384	1805	0.766759
GUT_GENOME000016	GUT_GENOME004087	99.3115	1305	1805	0.722992
GUT_GENOME000016	GUT_GENOME034186	99.2578	1257	1805	0.696399
GUT_GENOME000016	GUT_GENOME165151	99.2303	1223	1805	0.677562
GUT_GENOME000016	GUT_GENOME268316	99.2099	1324	1805	0.733518
GUT_GENOME000016	GUT_GENOME098299	98.1796	1143	1805	0.633241
GUT_GENOME000016	GUT_GENOME179340	98.1686	1082	1805	0.599446
GUT_GENOME000016	GUT_GENOME073769	98.1088	1151	1805	0.637673
GUT_GENOME000016	GUT_GENOME074771	98.0822	1238	1805	0.685873
GUT_GENOME000016	GUT_GENOME136948	98.0219	1170	1805	0.648199
GUT_GENOME000016	GUT_GENOME098087	98.0203	1256	1805	0.695845
GUT_GENOME000016	GUT_GENOME179317	97.8936	1265	1805	0.700831
GUT_GENOME000016	GUT_GENOME000086	97.8269	1299	1805	0.719668
GUT_GENOME000016	GUT_GENOME098672	97.7174	1076	1805	0.596122
GUT_GENOME000016	GUT_GENOME000434	97.6769	1361	1805	0.754017
GUT_GENOME000016	GUT_GENOME000208	97.6661	1400	1805	0.775623
GUT_GENOME000016	GUT_GENOME199160	93.7612	983	1805	0.544598
GUT_GENOME000016	GUT_GENOME004964	93.7325	885	1805	0.490305
GUT_GENOME000016	GUT_GENOME096670	93.6928	1066	1805	0.590582
GUT_GENOME000016	GUT_GENOME088312	93.5314	1035	1805	0.573407
GUT_GENOME000016	GUT_GENOME095966	91.6825	1203	1805	0.666482
GUT_GENOME000016	GUT_GENOME096485	91.6576	1239	1805	0.686427
GUT_GENOME000016	GUT_GENOME159351	91.6538	1089	1805	0.603324
GUT_GENOME000016	GUT_GENOME229936	91.5613	1052	1805	0.582825
GUT_GENOME000016	GUT_GENOME124071	91.5561	1095	1805	0.606648
GUT_GENOME000016	GUT_GENOME001033	91.554	1243	1805	0.688643
GUT_GENOME000016	GUT_GENOME098013	91.5444	1072	1805	0.593906
GUT_GENOME000016	GUT_GENOME261771	91.5418	1133	1805	0.627701
GUT_GENOME000016	GUT_GENOME045324	91.5385	1076	1805	0.596122
GUT_GENOME000016	GUT_GENOME184932	91.5106	929	1805	0.514681
GUT_GENOME000016	GUT_GENOME046307	91.5012	1047	1805	0.580055
GUT_GENOME000016	GUT_GENOME246487	91.4989	1002	1805	0.555125
GUT_GENOME000016	GUT_GENOME027435	91.4931	1100	1805	0.609418
GUT_GENOME000016	GUT_GENOME097823	91.4729	973	1805	0.539058
GUT_GENOME000016	GUT_GENOME096864	91.4629	1036	1805	0.573961
GUT_GENOME000016	GUT_GENOME097768	91.4623	1087	1805	0.602216
GUT_GENOME000016	GUT_GENOME185813	91.4621	1071	1805	0.593352
GUT_GENOME000016	GUT_GENOME195156	91.4615	1115	1805	0.617729
GUT_GENOME000016	GUT_GENOME225887	91.4585	1089	1805	0.603324
GUT_GENOME000016	GUT_GENOME152717	91.4574	1124	1805	0.622715
GUT_GENOME000016	GUT_GENOME245604	91.4513	1133	1805	0.627701
GUT_GENOME000016	GUT_GENOME029595	91.4483	1020	1805	0.565097
GUT_GENOME000016	GUT_GENOME220206	91.4452	930	1805	0.515235
GUT_GENOME000016	GUT_GENOME194873	91.445	1116	1805	0.618283
GUT_GENOME000016	GUT_GENOME001112	91.4387	1224	1805	0.678116
GUT_GENOME000016	GUT_GENOME231242	91.4382	1039	1805	0.575623
GUT_GENOME000016	GUT_GENOME185925	91.4341	1109	1805	0.614404
GUT_GENOME000016	GUT_GENOME178318	91.4318	1133	1805	0.627701
GUT_GENOME000016	GUT_GENOME149670	91.4248	1032	1805	0.571745
GUT_GENOME000016	GUT_GENOME239717	91.4166	1209	1805	0.669806
GUT_GENOME000016	GUT_GENOME252300	91.4161	1123	1805	0.622161
GUT_GENOME000016	GUT_GENOME152117	91.415	1173	1805	0.649861
GUT_GENOME000016	GUT_GENOME185944	91.4135	1121	1805	0.621053
GUT_GENOME000016	GUT_GENOME097244	91.4102	1120	1805	0.620499
GUT_GENOME000016	GUT_GENOME117204	91.4005	1117	1805	0.618837
GUT_GENOME000016	GUT_GENOME140112	91.4001	1198	1805	0.663712
GUT_GENOME000016	GUT_GENOME157694	91.3971	1056	1805	0.585042
GUT_GENOME000016	GUT_GENOME286431	91.3966	1066	1805	0.590582
GUT_GENOME000016	GUT_GENOME095227	91.3909	1177	1805	0.652078
GUT_GENOME000016	GUT_GENOME033081	91.3868	969	1805	0.536842
GUT_GENOME000016	GUT_GENOME153694	91.3845	1127	1805	0.624377
GUT_GENOME000016	GUT_GENOME095362	91.3841	1134	1805	0.628255
GUT_GENOME000016	GUT_GENOME181724	91.3792	1071	1805	0.593352
GUT_GENOME000016	GUT_GENOME019941	91.3747	1107	1805	0.613296
GUT_GENOME000016	GUT_GENOME094359	91.3732	1157	1805	0.640997
GUT_GENOME000016	GUT_GENOME151464	91.3717	1012	1805	0.560665
GUT_GENOME000016	GUT_GENOME001318	91.37	1204	1805	0.667036
GUT_GENOME000016	GUT_GENOME158182	91.3681	1139	1805	0.631025
GUT_GENOME000016	GUT_GENOME001696	91.3673	1229	1805	0.680886
GUT_GENOME000016	GUT_GENOME185454	91.3635	1096	1805	0.607202
GUT_GENOME000016	GUT_GENOME077320	91.3626	1003	1805	0.555679
GUT_GENOME000016	GUT_GENOME036091	91.3619	1070	1805	0.592798
GUT_GENOME000016	GUT_GENOME231288	91.3604	1061	1805	0.587812
GUT_GENOME000016	GUT_GENOME157020	91.3583	1149	1805	0.636565
GUT_GENOME000016	GUT_GENOME096883	91.358	1107	1805	0.613296
GUT_GENOME000016	GUT_GENOME000823	91.3542	1238	1805	0.685873
GUT_GENOME000016	GUT_GENOME178516	91.353	1097	1805	0.607756
GUT_GENOME000016	GUT_GENOME030183	91.3441	1051	1805	0.582271
GUT_GENOME000016	GUT_GENOME231061	91.3403	1066	1805	0.590582
GUT_GENOME000016	GUT_GENOME097940	91.3393	1072	1805	0.593906
GUT_GENOME000016	GUT_GENOME045232	91.3385	1157	1805	0.640997
GUT_GENOME000016	GUT_GENOME097863	91.3356	1127	1805	0.624377
GUT_GENOME000016	GUT_GENOME097693	91.3348	1111	1805	0.615512
GUT_GENOME000016	GUT_GENOME095722	91.3326	1157	1805	0.640997
GUT_GENOME000016	GUT_GENOME045131	91.3321	1082	1805	0.599446
GUT_GENOME000016	GUT_GENOME058686	91.3175	1151	1805	0.637673
GUT_GENOME000016	GUT_GENOME027720	91.3134	1128	1805	0.624931
GUT_GENOME000016	GUT_GENOME095730	91.3127	1193	1805	0.660942
GUT_GENOME000016	GUT_GENOME034086	91.3107	1029	1805	0.570083
GUT_GENOME000016	GUT_GENOME263206	91.3104	1011	1805	0.560111
GUT_GENOME000016	GUT_GENOME035701	91.3093	1055	1805	0.584488
GUT_GENOME000016	GUT_GENOME031778	91.306	1097	1805	0.607756
GUT_GENOME000016	GUT_GENOME057664	91.3046	1132	1805	0.627147
GUT_GENOME000016	GUT_GENOME185659	91.3045	978	1805	0.541828
GUT_GENOME000016	GUT_GENOME098408	91.2997	1017	1805	0.563435
GUT_GENOME000016	GUT_GENOME073256	91.2962	1092	1805	0.604986
GUT_GENOME000016	GUT_GENOME097996	91.2946	1096	1805	0.607202
GUT_GENOME000016	GUT_GENOME155633	91.2868	1145	1805	0.634349
GUT_GENOME000016	GUT_GENOME031388	91.2784	1047	1805	0.580055
GUT_GENOME000016	GUT_GENOME226088	91.2687	971	1805	0.53795
GUT_GENOME000016	GUT_GENOME244206	91.2664	1103	1805	0.61108
GUT_GENOME000016	GUT_GENOME034591	91.258	1032	1805	0.571745
GUT_GENOME000016	GUT_GENOME193301	91.2563	1106	1805	0.612742
GUT_GENOME000016	GUT_GENOME098450	91.2558	1060	1805	0.587258
GUT_GENOME000016	GUT_GENOME185158	91.2535	999	1805	0.553463
GUT_GENOME000016	GUT_GENOME045504	91.2533	1125	1805	0.623269
GUT_GENOME000016	GUT_GENOME098830	91.2523	980	1805	0.542936
GUT_GENOME000016	GUT_GENOME096695	91.2443	1047	1805	0.580055
GUT_GENOME000016	GUT_GENOME062272	91.237	1027	1805	0.568975
GUT_GENOME000016	GUT_GENOME065909	91.2263	1095	1805	0.606648
GUT_GENOME000016	GUT_GENOME249723	91.2245	1091	1805	0.604432
GUT_GENOME000016	GUT_GENOME243118	91.2198	1095	1805	0.606648
GUT_GENOME000016	GUT_GENOME044987	91.2028	1038	1805	0.575069
GUT_GENOME000016	GUT_GENOME264278	91.1543	1006	1805	0.557341
GUT_GENOME000016	GUT_GENOME157744	91.1512	1048	1805	0.580609
GUT_GENOME000016	GUT_GENOME052472	91.1308	1079	1805	0.597784
GUT_GENOME000016	GUT_GENOME037030	91.1292	1102	1805	0.610526
GUT_GENOME000016	GUT_GENOME029472	91.108	1011	1805	0.560111
GUT_GENOME000016	GUT_GENOME124434	91.0962	1079	1805	0.597784
GUT_GENOME000016	GUT_GENOME001151	91.0909	1205	1805	0.66759
GUT_GENOME000016	GUT_GENOME248181	91.0837	1067	1805	0.591136
GUT_GENOME000016	GUT_GENOME185076	91.083	1036	1805	0.573961
GUT_GENOME000016	GUT_GENOME231790	91.0647	1040	1805	0.576177
GUT_GENOME000016	GUT_GENOME121439	91.0414	1008	1805	0.558449
GUT_GENOME000016	GUT_GENOME156209	91.0369	1048	1805	0.580609
GUT_GENOME000016	GUT_GENOME073659	90.9834	1041	1805	0.576731
GUT_GENOME000016	GUT_GENOME001135	81.0266	726	1805	0.402216
GUT_GENOME000052	GUT_GENOME000052	100	1815	1827	0.993432
GUT_GENOME000052	GUT_GENOME148801	99.0944	1238	1827	0.677614
GUT_GENOME000052	GUT_GENOME246243	99.0879	1209	1827	0.661741
GUT_GENOME000052	GUT_GENOME230893	99.0542	1178	1827	0.644773
GUT_GENOME000052	GUT_GENOME194348	99.053	1180	1827	0.645868
GUT_GENOME000052	GUT_GENOME096649	99.0464	1201	1827	0.657362
GUT_GENOME000052	GUT_GENOME091913	99.0102	1186	1827	0.649152
GUT_GENOME000052	GUT_GENOME262395	99.0052	1163	1827	0.636563
GUT_GENOME000052	GUT_GENOME264495	99.0018	1162	1827	0.636015
GUT_GENOME000052	GUT_GENOME045211	98.9958	1133	1827	0.620142
GUT_GENOME000052	GUT_GENOME231261	98.9945	1095	1827	0.599343
GUT_GENOME000052	GUT_GENOME000731	98.9904	1272	1827	0.696223
GUT_GENOME000052	GUT_GENOME150044	98.9827	1252	1827	0.685276
GUT_GENOME000052	GUT_GENOME121971	98.9809	1172	1827	0.641489
GUT_GENOME000052	GUT_GENOME001733	98.9596	1338	1827	0.732348
GUT_GENOME000052	GUT_GENOME097753	98.9532	1182	1827	0.646962
GUT_GENOME000052	GUT_GENOME175155	98.9493	1226	1827	0.671045
GUT_GENOME000052	GUT_GENOME097943	98.9463	1213	1827	0.66393
GUT_GENOME000052	GUT_GENOME185780	98.941	1173	1827	0.642036
GUT_GENOME000052	GUT_GENOME165415	98.9372	1286	1827	0.703886
GUT_GENOME000052	GUT_GENOME098776	98.9353	1299	1827	0.711002
GUT_GENOME000052	GUT_GENOME045924	98.9337	1164	1827	0.63711
GUT_GENOME000052	GUT_GENOME097722	98.9313	1200	1827	0.656814
GUT_GENOME000052	GUT_GENOME098374	98.9303	1236	1827	0.676519
GUT_GENOME000052	GUT_GENOME262783	98.924	1180	1827	0.645868
GUT_GENOME000052	GUT_GENOME097780	98.9222	1243	1827	0.68035
GUT_GENOME000052	GUT_GENOME120046	98.9104	1042	1827	0.570334
GUT_GENOME000052	GUT_GENOME062271	98.8931	1213	1827	0.66393
GUT_GENOME000052	GUT_GENOME192013	98.8764	1200	1827	0.656814
GUT_GENOME000052	GUT_GENOME098667	98.8763	1190	1827	0.651341
GUT_GENOME000052	GUT_GENOME098445	98.8751	1125	1827	0.615764
GUT_GENOME000052	GUT_GENOME143134	98.8681	1455	1827	0.796388
GUT_GENOME000052	GUT_GENOME185315	98.865	1089	1827	0.596059
GUT_GENOME000052	GUT_GENOME185150	98.8561	1140	1827	0.623974
GUT_GENOME000052	GUT_GENOME045404	98.8536	1254	1827	0.686371
GUT_GENOME000052	GUT_GENOME256000	98.8506	1121	1827	0.613574
GUT_GENOME000052	GUT_GENOME098147	98.8398	1278	1827	0.699507
GUT_GENOME000052	GUT_GENOME097824	98.8205	1165	1827	0.637657
GUT_GENOME000052	GUT_GENOME185608	98.8204	1140	1827	0.623974
GUT_GENOME000052	GUT_GENOME231240	98.8186	1235	1827	0.675972
GUT_GENOME000052	GUT_GENOME140041	98.8166	1376	1827	0.753147
GUT_GENOME000052	GUT_GENOME000255	98.8148	1456	1827	0.796935
GUT_GENOME000052	GUT_GENOME103835	98.7927	1266	1827	0.692939
GUT_GENOME000052	GUT_GENOME000207	98.7927	1266	1827	0.692939
GUT_GENOME000052	GUT_GENOME170024	98.7857	1134	1827	0.62069
GUT_GENOME000052	GUT_GENOME066014	98.7806	1186	1827	0.649152
GUT_GENOME000052	GUT_GENOME096178	98.7677	1359	1827	0.743842
GUT_GENOME000052	GUT_GENOME045452	98.7564	1048	1827	0.573618
GUT_GENOME000052	GUT_GENOME158534	98.7506	1134	1827	0.62069
GUT_GENOME000052	GUT_GENOME186027	98.7273	1130	1827	0.6185
GUT_GENOME000052	GUT_GENOME062686	98.7089	1099	1827	0.601533
GUT_GENOME000052	GUT_GENOME096177	98.6067	1463	1827	0.800766
GUT_GENOME000052	GUT_GENOME096225	98.5888	1430	1827	0.782704
GUT_GENOME000052	GUT_GENOME005495	96.8889	1023	1827	0.559934
GUT_GENOME000086	GUT_GENOME000086	100	1693	1703	0.994128
GUT_GENOME000086	GUT_GENOME074771	99.6142	1290	1703	0.757487
GUT_GENOME000086	GUT_GENOME098299	99.5905	1158	1703	0.679977
GUT_GENOME000086	GUT_GENOME098087	99.5305	1307	1703	0.767469
GUT_GENOME000086	GUT_GENOME136948	99.512	1242	1703	0.729301
GUT_GENOME000086	GUT_GENOME179340	99.4946	1108	1703	0.650617
GUT_GENOME000086	GUT_GENOME073769	99.4799	1173	1703	0.688784
GUT_GENOME000086	GUT_GENOME000434	99.459	1404	1703	0.824427
GUT_GENOME000086	GUT_GENOME179317	99.4574	1297	1703	0.761597
GUT_GENOME000086	GUT_GENOME000208	99.3696	1426	1703	0.837346
GUT_GENOME000086	GUT_GENOME098672	99.3264	1123	1703	0.659425
GUT_GENOME000086	GUT_GENOME034186	98.3226	1135	1703	0.666471
GUT_GENOME000086	GUT_GENOME170020	98.2131	1124	1703	0.660012
GUT_GENOME000086	GUT_GENOME120132	98.1752	1263	1703	0.741632
GUT_GENOME000086	GUT_GENOME122019	98.1554	1218	1703	0.715208
GUT_GENOME000086	GUT_GENOME055234	98.1406	1130	1703	0.663535
GUT_GENOME000086	GUT_GENOME005956	98.13	1042	1703	0.611861
GUT_GENOME000086	GUT_GENOME256003	98.1227	1244	1703	0.730476
GUT_GENOME000086	GUT_GENOME045747	98.1118	1202	1703	0.705813
GUT_GENOME000086	GUT_GENOME120028	98.0693	1103	1703	0.647681
GUT_GENOME000086	GUT_GENOME029519	98.0642	1223	1703	0.718144
GUT_GENOME000086	GUT_GENOME268316	98.0618	1189	1703	0.69818
GUT_GENOME000086	GUT_GENOME107090	98.0587	1209	1703	0.709924
GUT_GENOME000086	GUT_GENOME120250	98.0492	1236	1703	0.725778
GUT_GENOME000086	GUT_GENOME243801	98.0091	1168	1703	0.685849
GUT_GENOME000086	GUT_GENOME168104	97.9857	1213	1703	0.712272
GUT_GENOME000086	GUT_GENOME096228	97.9763	1322	1703	0.776277
GUT_GENOME000086	GUT_GENOME165151	97.976	1111	1703	0.652378
GUT_GENOME000086	GUT_GENOME136562	97.9717	1247	1703	0.732237
GUT_GENOME000086	GUT_GENOME148802	97.9675	1187	1703	0.697005
GUT_GENOME000086	GUT_GENOME004087	97.9584	1160	1703	0.681151
GUT_GENOME000086	GUT_GENOME176873	97.9486	1109	1703	0.651204
GUT_GENOME000086	GUT_GENOME167970	97.9439	1122	1703	0.658837
GUT_GENOME000086	GUT_GENOME166270	97.9213	1226	1703	0.719906
GUT_GENOME000086	GUT_GENOME000016	97.9025	1300	1703	0.763359
GUT_GENOME000086	GUT_GENOME096487	97.8711	1319	1703	0.774516
GUT_GENOME000086	GUT_GENOME020409	97.8419	1077	1703	0.632413
GUT_GENOME000086	GUT_GENOME096670	94.1297	1057	1703	0.620669
GUT_GENOME000086	GUT_GENOME004964	94.1115	861	1703	0.505578
GUT_GENOME000086	GUT_GENOME088312	94.0973	1010	1703	0.593071
GUT_GENOME000086	GUT_GENOME199160	94.0597	976	1703	0.573106
GUT_GENOME000086	GUT_GENOME181724	91.6386	1021	1703	0.59953
GUT_GENOME000086	GUT_GENOME220206	91.6363	906	1703	0.532002
GUT_GENOME000086	GUT_GENOME159351	91.6223	1057	1703	0.620669
GUT_GENOME000086	GUT_GENOME098408	91.5767	963	1703	0.565473
GUT_GENOME000086	GUT_GENOME157694	91.5645	1015	1703	0.596007
GUT_GENOME000086	GUT_GENOME027435	91.5538	1057	1703	0.620669
GUT_GENOME000086	GUT_GENOME045131	91.5364	1051	1703	0.617146
GUT_GENOME000086	GUT_GENOME229936	91.5322	1035	1703	0.607751
GUT_GENOME000086	GUT_GENOME225887	91.5159	1055	1703	0.619495
GUT_GENOME000086	GUT_GENOME027720	91.5152	1076	1703	0.631826
GUT_GENOME000086	GUT_GENOME246487	91.5108	981	1703	0.576042
GUT_GENOME000086	GUT_GENOME117204	91.5086	1092	1703	0.641221
GUT_GENOME000086	GUT_GENOME095966	91.5069	1152	1703	0.676453
GUT_GENOME000086	GUT_GENOME046307	91.5047	1029	1703	0.604228
GUT_GENOME000086	GUT_GENOME231242	91.5044	998	1703	0.586025
GUT_GENOME000086	GUT_GENOME151464	91.4984	965	1703	0.566647
GUT_GENOME000086	GUT_GENOME194873	91.4958	1089	1703	0.63946
GUT_GENOME000086	GUT_GENOME097768	91.4877	1050	1703	0.616559
GUT_GENOME000086	GUT_GENOME239717	91.4851	1118	1703	0.656489
GUT_GENOME000086	GUT_GENOME184932	91.4793	902	1703	0.529654
GUT_GENOME000086	GUT_GENOME245604	91.4725	1092	1703	0.641221
GUT_GENOME000086	GUT_GENOME152717	91.4689	1086	1703	0.637698
GUT_GENOME000086	GUT_GENOME178516	91.4685	1056	1703	0.620082
GUT_GENOME000086	GUT_GENOME158182	91.4615	1077	1703	0.632413
GUT_GENOME000086	GUT_GENOME096695	91.4586	1002	1703	0.588373
GUT_GENOME000086	GUT_GENOME264278	91.4544	962	1703	0.564885
GUT_GENOME000086	GUT_GENOME001696	91.4516	1133	1703	0.665297
GUT_GENOME000086	GUT_GENOME185659	91.449	952	1703	0.559014
GUT_GENOME000086	GUT_GENOME045324	91.4489	1041	1703	0.611274
GUT_GENOME000086	GUT_GENOME231288	91.4485	1019	1703	0.598356
GUT_GENOME000086	GUT_GENOME149670	91.4481	986	1703	0.578978
GUT_GENOME000086	GUT_GENOME057664	91.4471	1093	1703	0.641809
GUT_GENOME000086	GUT_GENOME058686	91.4446	1109	1703	0.651204
GUT_GENOME000086	GUT_GENOME153694	91.4443	1095	1703	0.642983
GUT_GENOME000086	GUT_GENOME001033	91.44	1157	1703	0.679389
GUT_GENOME000086	GUT_GENOME252300	91.4386	1084	1703	0.636524
GUT_GENOME000086	GUT_GENOME231061	91.4271	1032	1703	0.605989
GUT_GENOME000086	GUT_GENOME095362	91.4244	1103	1703	0.647681
GUT_GENOME000086	GUT_GENOME001112	91.4221	1158	1703	0.679977
GUT_GENOME000086	GUT_GENOME243118	91.4215	1048	1703	0.615385
GUT_GENOME000086	GUT_GENOME185813	91.421	1025	1703	0.601879
GUT_GENOME000086	GUT_GENOME036091	91.4206	1040	1703	0.610687
GUT_GENOME000086	GUT_GENOME095227	91.4181	1128	1703	0.662361
GUT_GENOME000086	GUT_GENOME065909	91.4159	1048	1703	0.615385
GUT_GENOME000086	GUT_GENOME045504	91.4152	1078	1703	0.633001
GUT_GENOME000086	GUT_GENOME097823	91.4056	952	1703	0.559014
GUT_GENOME000086	GUT_GENOME095730	91.4045	1102	1703	0.647093
GUT_GENOME000086	GUT_GENOME096485	91.4035	1184	1703	0.695244
GUT_GENOME000086	GUT_GENOME124071	91.4022	1055	1703	0.619495
GUT_GENOME000086	GUT_GENOME095722	91.4005	1096	1703	0.64357
GUT_GENOME000086	GUT_GENOME031778	91.4002	1069	1703	0.627716
GUT_GENOME000086	GUT_GENOME030183	91.3954	1022	1703	0.600117
GUT_GENOME000086	GUT_GENOME195156	91.3954	1077	1703	0.632413
GUT_GENOME000086	GUT_GENOME185158	91.3946	975	1703	0.572519
GUT_GENOME000086	GUT_GENOME029595	91.3923	989	1703	0.58074
GUT_GENOME000086	GUT_GENOME034086	91.3893	978	1703	0.574281
GUT_GENOME000086	GUT_GENOME000823	91.3892	1157	1703	0.679389
GUT_GENOME000086	GUT_GENOME248181	91.3885	1022	1703	0.600117
GUT_GENOME000086	GUT_GENOME152117	91.3836	1137	1703	0.667645
GUT_GENOME000086	GUT_GENOME098013	91.378	1058	1703	0.621257
GUT_GENOME000086	GUT_GENOME185944	91.3779	1066	1703	0.625954
GUT_GENOME000086	GUT_GENOME077320	91.3753	969	1703	0.568996
GUT_GENOME000086	GUT_GENOME140112	91.375	1139	1703	0.66882
GUT_GENOME000086	GUT_GENOME244206	91.3715	1050	1703	0.616559
GUT_GENOME000086	GUT_GENOME193301	91.364	1064	1703	0.62478
GUT_GENOME000086	GUT_GENOME178318	91.3639	1089	1703	0.63946
GUT_GENOME000086	GUT_GENOME045232	91.3541	1100	1703	0.645919
GUT_GENOME000086	GUT_GENOME263206	91.3528	995	1703	0.584263
GUT_GENOME000086	GUT_GENOME097244	91.3508	1075	1703	0.631239
GUT_GENOME000086	GUT_GENOME261771	91.3505	1099	1703	0.645332
GUT_GENOME000086	GUT_GENOME249723	91.3486	1058	1703	0.621257
GUT_GENOME000086	GUT_GENOME037030	91.3466	1057	1703	0.620669
GUT_GENOME000086	GUT_GENOME098450	91.3446	1028	1703	0.603641
GUT_GENOME000086	GUT_GENOME094359	91.3445	1111	1703	0.652378
GUT_GENOME000086	GUT_GENOME019941	91.3444	1068	1703	0.627129
GUT_GENOME000086	GUT_GENOME096864	91.3382	1013	1703	0.594833
GUT_GENOME000086	GUT_GENOME098830	91.3382	942	1703	0.553142
GUT_GENOME000086	GUT_GENOME286431	91.3319	1040	1703	0.610687
GUT_GENOME000086	GUT_GENOME073256	91.331	1057	1703	0.620669
GUT_GENOME000086	GUT_GENOME097996	91.3296	1071	1703	0.62889
GUT_GENOME000086	GUT_GENOME035701	91.3295	1024	1703	0.601292
GUT_GENOME000086	GUT_GENOME062272	91.3277	984	1703	0.577804
GUT_GENOME000086	GUT_GENOME097693	91.3263	1090	1703	0.640047
GUT_GENOME000086	GUT_GENOME185925	91.3252	1061	1703	0.623018
GUT_GENOME000086	GUT_GENOME226088	91.3228	951	1703	0.558426
GUT_GENOME000086	GUT_GENOME155633	91.3178	1076	1703	0.631826
GUT_GENOME000086	GUT_GENOME033081	91.3173	937	1703	0.550206
GUT_GENOME000086	GUT_GENOME001151	91.3156	1129	1703	0.662948
GUT_GENOME000086	GUT_GENOME157020	91.308	1120	1703	0.657663
GUT_GENOME000086	GUT_GENOME097863	91.308	1107	1703	0.650029
GUT_GENOME000086	GUT_GENOME096883	91.3078	1060	1703	0.622431
GUT_GENOME000086	GUT_GENOME185076	91.3075	977	1703	0.573693
GUT_GENOME000086	GUT_GENOME052472	91.2855	1019	1703	0.598356
GUT_GENOME000086	GUT_GENOME097940	91.2822	1056	1703	0.620082
GUT_GENOME000086	GUT_GENOME044987	91.2779	996	1703	0.58485
GUT_GENOME000086	GUT_GENOME073659	91.2744	994	1703	0.583676
GUT_GENOME000086	GUT_GENOME185454	91.2627	1057	1703	0.620669
GUT_GENOME000086	GUT_GENOME124434	91.2619	1036	1703	0.608338
GUT_GENOME000086	GUT_GENOME031388	91.2594	1007	1703	0.591309
GUT_GENOME000086	GUT_GENOME157744	91.2556	1000	1703	0.587199
GUT_GENOME000086	GUT_GENOME034591	91.2511	1010	1703	0.593071
GUT_GENOME000086	GUT_GENOME001318	91.243	1153	1703	0.677041
GUT_GENOME000086	GUT_GENOME231790	91.2161	984	1703	0.577804
GUT_GENOME000086	GUT_GENOME156209	91.2145	1024	1703	0.601292
GUT_GENOME000086	GUT_GENOME029472	91.2019	985	1703	0.578391
GUT_GENOME000086	GUT_GENOME121439	91.1275	999	1703	0.586612
GUT_GENOME000086	GUT_GENOME000657	80.9759	684	1703	0.401644
GUT_GENOME000086	GUT_GENOME001135	80.9126	687	1703	0.403406
GUT_GENOME000181	GUT_GENOME000181	100	2057	2061	0.998059
GUT_GENOME000181	GUT_GENOME000657	99.3708	1787	2061	0.867055
GUT_GENOME000181	GUT_GENOME085738	99.3617	1658	2061	0.804464
GUT_GENOME000181	GUT_GENOME001135	99.3348	1842	2061	0.893741
GUT_GENOME000181	GUT_GENOME096486	99.3288	1777	2061	0.862203
GUT_GENOME000181	GUT_GENOME096223	99.2551	1789	2061	0.868025
GUT_GENOME000207	GUT_GENOME103835	100	1465	1480	0.989865
GUT_GENOME000207	GUT_GENOME000207	100	1465	1480	0.989865
GUT_GENOME000207	GUT_GENOME000731	99.4027	1312	1480	0.886486
GUT_GENOME000207	GUT_GENOME231240	99.3772	1233	1480	0.833108
GUT_GENOME000207	GUT_GENOME231261	99.3442	1078	1480	0.728378
GUT_GENOME000207	GUT_GENOME096178	99.3337	1337	1480	0.903378
GUT_GENOME000207	GUT_GENOME170024	99.2877	1114	1480	0.752703
GUT_GENOME000207	GUT_GENOME120046	99.2576	1069	1480	0.722297
GUT_GENOME000207	GUT_GENOME121971	99.2451	1149	1480	0.776351
GUT_GENOME000207	GUT_GENOME097824	99.2029	1149	1480	0.776351
GUT_GENOME000207	GUT_GENOME230893	99.1526	1137	1480	0.768243
GUT_GENOME000207	GUT_GENOME097722	99.1342	1148	1480	0.775676
GUT_GENOME000207	GUT_GENOME098374	99.1307	1175	1480	0.793919
GUT_GENOME000207	GUT_GENOME097753	99.1289	1141	1480	0.770946
GUT_GENOME000207	GUT_GENOME262783	99.1251	1136	1480	0.767568
GUT_GENOME000207	GUT_GENOME158534	99.1155	1116	1480	0.754054
GUT_GENOME000207	GUT_GENOME194348	99.1108	1169	1480	0.789865
GUT_GENOME000207	GUT_GENOME185608	99.096	1108	1480	0.748649
GUT_GENOME000207	GUT_GENOME098667	99.0828	1165	1480	0.787162
GUT_GENOME000207	GUT_GENOME185150	99.0792	1094	1480	0.739189
GUT_GENOME000207	GUT_GENOME140041	99.0729	1240	1480	0.837838
GUT_GENOME000207	GUT_GENOME264495	99.0669	1122	1480	0.758108
GUT_GENOME000207	GUT_GENOME192013	99.0614	1150	1480	0.777027
GUT_GENOME000207	GUT_GENOME001733	99.0399	1266	1480	0.855405
GUT_GENOME000207	GUT_GENOME097780	99.023	1189	1480	0.803378
GUT_GENOME000207	GUT_GENOME185315	99.0116	1052	1480	0.710811
GUT_GENOME000207	GUT_GENOME186027	99.0098	1105	1480	0.746622
GUT_GENOME000207	GUT_GENOME097943	98.9992	1173	1480	0.792568
GUT_GENOME000207	GUT_GENOME175155	98.995	1158	1480	0.782432
GUT_GENOME000207	GUT_GENOME143134	98.9817	1308	1480	0.883784
GUT_GENOME000207	GUT_GENOME096649	98.976	1115	1480	0.753378
GUT_GENOME000207	GUT_GENOME185780	98.971	1131	1480	0.764189
GUT_GENOME000207	GUT_GENOME098776	98.9692	1208	1480	0.816216
GUT_GENOME000207	GUT_GENOME098445	98.9667	1073	1480	0.725
GUT_GENOME000207	GUT_GENOME165415	98.9634	1226	1480	0.828378
GUT_GENOME000207	GUT_GENOME000255	98.9627	1270	1480	0.858108
GUT_GENOME000207	GUT_GENOME045211	98.9623	1131	1480	0.764189
GUT_GENOME000207	GUT_GENOME096177	98.9505	1303	1480	0.880405
GUT_GENOME000207	GUT_GENOME045924	98.946	1128	1480	0.762162
GUT_GENOME000207	GUT_GENOME148801	98.9337	1161	1480	0.784459
GUT_GENOME000207	GUT_GENOME000052	98.9317	1262	1480	0.852703
GUT_GENOME000207	GUT_GENOME096225	98.9308	1312	1480	0.886486
GUT_GENOME000207	GUT_GENOME246243	98.9246	1148	1480	0.775676
GUT_GENOME000207	GUT_GENOME150044	98.9131	1182	1480	0.798649
GUT_GENOME000207	GUT_GENOME098147	98.91	1185	1480	0.800676
GUT_GENOME000207	GUT_GENOME066014	98.9071	1132	1480	0.764865
GUT_GENOME000207	GUT_GENOME256000	98.9058	1066	1480	0.72027
GUT_GENOME000207	GUT_GENOME262395	98.8849	1099	1480	0.742568
GUT_GENOME000207	GUT_GENOME045452	98.8646	1017	1480	0.687162
GUT_GENOME000207	GUT_GENOME091913	98.862	1134	1480	0.766216
GUT_GENOME000207	GUT_GENOME062686	98.8564	1046	1480	0.706757
GUT_GENOME000207	GUT_GENOME045404	98.8153	1213	1480	0.819595
GUT_GENOME000207	GUT_GENOME062271	98.7998	1096	1480	0.740541
GUT_GENOME000207	GUT_GENOME005495	96.9042	983	1480	0.664189
GUT_GENOME000208	GUT_GENOME000208	100	1722	1740	0.989655
GUT_GENOME000208	GUT_GENOME098299	99.8113	1230	1740	0.706897
GUT_GENOME000208	GUT_GENOME179340	99.6236	1146	1740	0.658621
GUT_GENOME000208	GUT_GENOME179317	99.5465	1390	1740	0.798851
GUT_GENOME000208	GUT_GENOME098087	99.4391	1373	1740	0.78908
GUT_GENOME000208	GUT_GENOME074771	99.4389	1353	1740	0.777586
GUT_GENOME000208	GUT_GENOME073769	99.435	1202	1740	0.690805
GUT_GENOME000208	GUT_GENOME136948	99.4056	1263	1740	0.725862
GUT_GENOME000208	GUT_GENOME000434	99.3308	1487	1740	0.854598
GUT_GENOME000208	GUT_GENOME000086	99.2785	1427	1740	0.820115
GUT_GENOME000208	GUT_GENOME098672	99.278	1169	1740	0.671839
GUT_GENOME000208	GUT_GENOME034186	98.2976	1154	1740	0.663218
GUT_GENOME000208	GUT_GENOME170020	98.2853	1142	1740	0.656322
GUT_GENOME000208	GUT_GENOME055234	98.2168	1162	1740	0.667816
GUT_GENOME000208	GUT_GENOME122019	98.1395	1258	1740	0.722989
GUT_GENOME000208	GUT_GENOME120028	98.1308	1144	1740	0.657471
GUT_GENOME000208	GUT_GENOME005956	98.0957	1070	1740	0.614943
GUT_GENOME000208	GUT_GENOME120132	98.0948	1277	1740	0.733908
GUT_GENOME000208	GUT_GENOME167970	98.0283	1146	1740	0.658621
GUT_GENOME000208	GUT_GENOME256003	98.0238	1296	1740	0.744828
GUT_GENOME000208	GUT_GENOME107090	98.0219	1240	1740	0.712644
GUT_GENOME000208	GUT_GENOME168104	98.0107	1239	1740	0.712069
GUT_GENOME000208	GUT_GENOME045747	98.0047	1226	1740	0.704598
GUT_GENOME000208	GUT_GENOME243801	97.9939	1223	1740	0.702874
GUT_GENOME000208	GUT_GENOME136562	97.9783	1291	1740	0.741954
GUT_GENOME000208	GUT_GENOME148802	97.9644	1219	1740	0.700575
GUT_GENOME000208	GUT_GENOME004087	97.9572	1197	1740	0.687931
GUT_GENOME000208	GUT_GENOME166270	97.955	1252	1740	0.71954
GUT_GENOME000208	GUT_GENOME029519	97.9247	1249	1740	0.717816
GUT_GENOME000208	GUT_GENOME020409	97.9208	1096	1740	0.629885
GUT_GENOME000208	GUT_GENOME176873	97.8954	1161	1740	0.667241
GUT_GENOME000208	GUT_GENOME268316	97.8689	1214	1740	0.697701
GUT_GENOME000208	GUT_GENOME165151	97.842	1154	1740	0.663218
GUT_GENOME000208	GUT_GENOME120250	97.7957	1308	1740	0.751724
GUT_GENOME000208	GUT_GENOME096487	97.7811	1388	1740	0.797701
GUT_GENOME000208	GUT_GENOME096228	97.7653	1384	1740	0.795402
GUT_GENOME000208	GUT_GENOME000016	97.6681	1395	1740	0.801724
GUT_GENOME000208	GUT_GENOME199160	94.2763	992	1740	0.570115
GUT_GENOME000208	GUT_GENOME096670	94.2717	1113	1740	0.639655
GUT_GENOME000208	GUT_GENOME004964	94.2309	883	1740	0.507471
GUT_GENOME000208	GUT_GENOME088312	93.9575	1054	1740	0.605747
GUT_GENOME000208	GUT_GENOME159351	91.7895	1054	1740	0.605747
GUT_GENOME000208	GUT_GENOME220206	91.7113	906	1740	0.52069
GUT_GENOME000208	GUT_GENOME229936	91.7063	1051	1740	0.604023
GUT_GENOME000208	GUT_GENOME046307	91.6945	1034	1740	0.594253
GUT_GENOME000208	GUT_GENOME181724	91.6685	1036	1740	0.595402
GUT_GENOME000208	GUT_GENOME077320	91.6268	1003	1740	0.576437
GUT_GENOME000208	GUT_GENOME098013	91.5928	1054	1740	0.605747
GUT_GENOME000208	GUT_GENOME157694	91.582	1026	1740	0.589655
GUT_GENOME000208	GUT_GENOME195156	91.5728	1087	1740	0.624713
GUT_GENOME000208	GUT_GENOME231242	91.5682	1010	1740	0.58046
GUT_GENOME000208	GUT_GENOME095966	91.5671	1173	1740	0.674138
GUT_GENOME000208	GUT_GENOME149670	91.561	1000	1740	0.574713
GUT_GENOME000208	GUT_GENOME184932	91.5604	921	1740	0.52931
GUT_GENOME000208	GUT_GENOME097768	91.56	1068	1740	0.613793
GUT_GENOME000208	GUT_GENOME045131	91.5549	1072	1740	0.616092
GUT_GENOME000208	GUT_GENOME096864	91.5504	1016	1740	0.583908
GUT_GENOME000208	GUT_GENOME029595	91.5493	990	1740	0.568966
GUT_GENOME000208	GUT_GENOME239717	91.5413	1151	1740	0.661494
GUT_GENOME000208	GUT_GENOME124071	91.5411	1072	1740	0.616092
GUT_GENOME000208	GUT_GENOME027435	91.5364	1081	1740	0.621264
GUT_GENOME000208	GUT_GENOME095362	91.5338	1128	1740	0.648276
GUT_GENOME000208	GUT_GENOME045324	91.5335	1064	1740	0.611494
GUT_GENOME000208	GUT_GENOME096883	91.5279	1088	1740	0.625287
GUT_GENOME000208	GUT_GENOME117204	91.5245	1092	1740	0.627586
GUT_GENOME000208	GUT_GENOME096695	91.5221	1008	1740	0.57931
GUT_GENOME000208	GUT_GENOME246487	91.5215	981	1740	0.563793
GUT_GENOME000208	GUT_GENOME231288	91.5204	1021	1740	0.586782
GUT_GENOME000208	GUT_GENOME151464	91.5142	984	1740	0.565517
GUT_GENOME000208	GUT_GENOME036091	91.5082	1046	1740	0.601149
GUT_GENOME000208	GUT_GENOME194873	91.5053	1096	1740	0.629885
GUT_GENOME000208	GUT_GENOME001112	91.5037	1164	1740	0.668966
GUT_GENOME000208	GUT_GENOME019941	91.4995	1074	1740	0.617241
GUT_GENOME000208	GUT_GENOME073659	91.4982	999	1740	0.574138
GUT_GENOME000208	GUT_GENOME152717	91.4967	1096	1740	0.629885
GUT_GENOME000208	GUT_GENOME153694	91.4945	1094	1740	0.628736
GUT_GENOME000208	GUT_GENOME252300	91.4931	1095	1740	0.62931
GUT_GENOME000208	GUT_GENOME185944	91.4908	1076	1740	0.618391
GUT_GENOME000208	GUT_GENOME152117	91.4855	1149	1740	0.660345
GUT_GENOME000208	GUT_GENOME097940	91.481	1063	1740	0.61092
GUT_GENOME000208	GUT_GENOME034086	91.4801	986	1740	0.566667
GUT_GENOME000208	GUT_GENOME263206	91.4774	1002	1740	0.575862
GUT_GENOME000208	GUT_GENOME095227	91.4762	1155	1740	0.663793
GUT_GENOME000208	GUT_GENOME185813	91.4728	1030	1740	0.591954
GUT_GENOME000208	GUT_GENOME065909	91.4684	1045	1740	0.600575
GUT_GENOME000208	GUT_GENOME096485	91.4666	1204	1740	0.691954
GUT_GENOME000208	GUT_GENOME261771	91.4664	1108	1740	0.636782
GUT_GENOME000208	GUT_GENOME231061	91.466	1040	1740	0.597701
GUT_GENOME000208	GUT_GENOME098408	91.4647	986	1740	0.566667
GUT_GENOME000208	GUT_GENOME097863	91.4632	1117	1740	0.641954
GUT_GENOME000208	GUT_GENOME185925	91.4617	1070	1740	0.614943
GUT_GENOME000208	GUT_GENOME097823	91.4608	969	1740	0.556897
GUT_GENOME000208	GUT_GENOME158182	91.4594	1095	1740	0.62931
GUT_GENOME000208	GUT_GENOME245604	91.4519	1100	1740	0.632184
GUT_GENOME000208	GUT_GENOME095730	91.4512	1134	1740	0.651724
GUT_GENOME000208	GUT_GENOME157744	91.4494	995	1740	0.571839
GUT_GENOME000208	GUT_GENOME249723	91.447	1058	1740	0.608046
GUT_GENOME000208	GUT_GENOME001151	91.4457	1170	1740	0.672414
GUT_GENOME000208	GUT_GENOME027720	91.4438	1102	1740	0.633333
GUT_GENOME000208	GUT_GENOME058686	91.442	1112	1740	0.63908
GUT_GENOME000208	GUT_GENOME045232	91.4371	1118	1740	0.642529
GUT_GENOME000208	GUT_GENOME034591	91.433	1019	1740	0.585632
GUT_GENOME000208	GUT_GENOME097996	91.4313	1070	1740	0.614943
GUT_GENOME000208	GUT_GENOME193301	91.4305	1087	1740	0.624713
GUT_GENOME000208	GUT_GENOME031778	91.4304	1078	1740	0.61954
GUT_GENOME000208	GUT_GENOME178318	91.426	1101	1740	0.632759
GUT_GENOME000208	GUT_GENOME052472	91.4243	1017	1740	0.584483
GUT_GENOME000208	GUT_GENOME185659	91.4232	963	1740	0.553448
GUT_GENOME000208	GUT_GENOME045504	91.4209	1088	1740	0.625287
GUT_GENOME000208	GUT_GENOME178516	91.4199	1078	1740	0.61954
GUT_GENOME000208	GUT_GENOME097693	91.4158	1104	1740	0.634483
GUT_GENOME000208	GUT_GENOME225887	91.4151	1062	1740	0.610345
GUT_GENOME000208	GUT_GENOME248181	91.4142	1040	1740	0.597701
GUT_GENOME000208	GUT_GENOME057664	91.4135	1115	1740	0.640805
GUT_GENOME000208	GUT_GENOME001033	91.411	1175	1740	0.675287
GUT_GENOME000208	GUT_GENOME097244	91.4061	1075	1740	0.617816
GUT_GENOME000208	GUT_GENOME226088	91.3991	956	1740	0.549425
GUT_GENOME000208	GUT_GENOME155633	91.3932	1090	1740	0.626437
GUT_GENOME000208	GUT_GENOME124434	91.3894	1044	1740	0.6
GUT_GENOME000208	GUT_GENOME044987	91.3775	1013	1740	0.582184
GUT_GENOME000208	GUT_GENOME030183	91.3767	1030	1740	0.591954
GUT_GENOME000208	GUT_GENOME031388	91.3766	1024	1740	0.588506
GUT_GENOME000208	GUT_GENOME140112	91.3764	1158	1740	0.665517
GUT_GENOME000208	GUT_GENOME185158	91.3746	1001	1740	0.575287
GUT_GENOME000208	GUT_GENOME185454	91.3691	1062	1740	0.610345
GUT_GENOME000208	GUT_GENOME037030	91.3686	1072	1740	0.616092
GUT_GENOME000208	GUT_GENOME098450	91.3676	1043	1740	0.599425
GUT_GENOME000208	GUT_GENOME185076	91.3503	989	1740	0.568391
GUT_GENOME000208	GUT_GENOME001318	91.3485	1165	1740	0.66954
GUT_GENOME000208	GUT_GENOME035701	91.3482	1046	1740	0.601149
GUT_GENOME000208	GUT_GENOME062272	91.3448	993	1740	0.57069
GUT_GENOME000208	GUT_GENOME000823	91.3394	1190	1740	0.683908
GUT_GENOME000208	GUT_GENOME033081	91.3372	950	1740	0.545977
GUT_GENOME000208	GUT_GENOME157020	91.3363	1137	1740	0.653448
GUT_GENOME000208	GUT_GENOME243118	91.3262	1076	1740	0.618391
GUT_GENOME000208	GUT_GENOME001696	91.3239	1197	1740	0.687931
GUT_GENOME000208	GUT_GENOME095722	91.3178	1120	1740	0.643678
GUT_GENOME000208	GUT_GENOME244206	91.3155	1082	1740	0.621839
GUT_GENOME000208	GUT_GENOME286431	91.3058	1053	1740	0.605172
GUT_GENOME000208	GUT_GENOME094359	91.2969	1153	1740	0.662644
GUT_GENOME000208	GUT_GENOME264278	91.2849	992	1740	0.570115
GUT_GENOME000208	GUT_GENOME156209	91.2832	1053	1740	0.605172
GUT_GENOME000208	GUT_GENOME073256	91.2673	1083	1740	0.622414
GUT_GENOME000208	GUT_GENOME098830	91.2476	974	1740	0.55977
GUT_GENOME000208	GUT_GENOME029472	91.2243	994	1740	0.571264
GUT_GENOME000208	GUT_GENOME121439	91.1577	1018	1740	0.585057
GUT_GENOME000208	GUT_GENOME231790	91.1352	1010	1740	0.58046
GUT_GENOME000208	GUT_GENOME001135	81.3111	732	1740	0.42069
GUT_GENOME000255	GUT_GENOME000255	100	1655	1668	0.992206
GUT_GENOME000255	GUT_GENOME096177	99.6014	1577	1668	0.945444
GUT_GENOME000255	GUT_GENOME096649	99.534	1245	1668	0.746403
GUT_GENOME000255	GUT_GENOME148801	99.1931	1226	1668	0.735012
GUT_GENOME000255	GUT_GENOME194348	99.1198	1177	1668	0.705635
GUT_GENOME000255	GUT_GENOME264495	99.1144	1162	1668	0.696643
GUT_GENOME000255	GUT_GENOME098776	99.1056	1284	1668	0.769784
GUT_GENOME000255	GUT_GENOME262395	99.1006	1145	1668	0.686451
GUT_GENOME000255	GUT_GENOME121971	99.06	1178	1668	0.706235
GUT_GENOME000255	GUT_GENOME097722	99.0556	1189	1668	0.71283
GUT_GENOME000255	GUT_GENOME262783	99.0503	1181	1668	0.708034
GUT_GENOME000255	GUT_GENOME231261	99.0495	1103	1668	0.661271
GUT_GENOME000255	GUT_GENOME150044	99.0463	1243	1668	0.745204
GUT_GENOME000255	GUT_GENOME062271	99.0432	1172	1668	0.702638
GUT_GENOME000255	GUT_GENOME097753	99.0409	1186	1668	0.711031
GUT_GENOME000255	GUT_GENOME045404	99.019	1246	1668	0.747002
GUT_GENOME000255	GUT_GENOME230893	99.0171	1178	1668	0.706235
GUT_GENOME000255	GUT_GENOME001733	99.0139	1326	1668	0.794964
GUT_GENOME000255	GUT_GENOME185780	98.9938	1156	1668	0.693046
GUT_GENOME000255	GUT_GENOME246243	98.9844	1213	1668	0.727218
GUT_GENOME000255	GUT_GENOME231240	98.9794	1234	1668	0.739808
GUT_GENOME000255	GUT_GENOME097824	98.9759	1167	1668	0.69964
GUT_GENOME000255	GUT_GENOME096178	98.9716	1373	1668	0.823141
GUT_GENOME000255	GUT_GENOME000052	98.9671	1456	1668	0.872902
GUT_GENOME000255	GUT_GENOME165415	98.9495	1251	1668	0.75
GUT_GENOME000255	GUT_GENOME091913	98.9493	1203	1668	0.721223
GUT_GENOME000255	GUT_GENOME192013	98.9449	1192	1668	0.714628
GUT_GENOME000255	GUT_GENOME185150	98.9412	1138	1668	0.682254
GUT_GENOME000255	GUT_GENOME098374	98.9349	1224	1668	0.733813
GUT_GENOME000255	GUT_GENOME098445	98.934	1138	1668	0.682254
GUT_GENOME000255	GUT_GENOME045211	98.9338	1151	1668	0.690048
GUT_GENOME000255	GUT_GENOME158534	98.93	1139	1668	0.682854
GUT_GENOME000255	GUT_GENOME098147	98.9207	1246	1668	0.747002
GUT_GENOME000255	GUT_GENOME185315	98.9176	1080	1668	0.647482
GUT_GENOME000255	GUT_GENOME000731	98.9141	1288	1668	0.772182
GUT_GENOME000255	GUT_GENOME185608	98.9065	1140	1668	0.683453
GUT_GENOME000255	GUT_GENOME066014	98.9042	1158	1668	0.694245
GUT_GENOME000255	GUT_GENOME256000	98.8947	1117	1668	0.669664
GUT_GENOME000255	GUT_GENOME143134	98.8836	1424	1668	0.853717
GUT_GENOME000255	GUT_GENOME140041	98.8823	1313	1668	0.78717
GUT_GENOME000255	GUT_GENOME000207	98.8636	1274	1668	0.763789
GUT_GENOME000255	GUT_GENOME103835	98.8636	1274	1668	0.763789
GUT_GENOME000255	GUT_GENOME098667	98.8603	1206	1668	0.723022
GUT_GENOME000255	GUT_GENOME170024	98.8552	1142	1668	0.684652
GUT_GENOME000255	GUT_GENOME045452	98.8405	1065	1668	0.638489
GUT_GENOME000255	GUT_GENOME120046	98.834	1056	1668	0.633094
GUT_GENOME000255	GUT_GENOME175155	98.7956	1231	1668	0.73801
GUT_GENOME000255	GUT_GENOME097943	98.7753	1227	1668	0.735612
GUT_GENOME000255	GUT_GENOME097780	98.7713	1268	1668	0.760192
GUT_GENOME000255	GUT_GENOME045924	98.7492	1166	1668	0.699041
GUT_GENOME000255	GUT_GENOME186027	98.7059	1136	1668	0.681055
GUT_GENOME000255	GUT_GENOME062686	98.6314	1113	1668	0.667266
GUT_GENOME000255	GUT_GENOME096225	98.4969	1389	1668	0.832734
GUT_GENOME000255	GUT_GENOME005495	96.8476	1053	1668	0.631295
GUT_GENOME000434	GUT_GENOME000434	100	1727	1734	0.995963
GUT_GENOME000434	GUT_GENOME074771	99.5785	1353	1734	0.780277
GUT_GENOME000434	GUT_GENOME098087	99.5322	1355	1734	0.78143
GUT_GENOME000434	GUT_GENOME073769	99.4961	1184	1734	0.682814
GUT_GENOME000434	GUT_GENOME136948	99.4917	1234	1734	0.711649
GUT_GENOME000434	GUT_GENOME179340	99.4843	1111	1734	0.640715
GUT_GENOME000434	GUT_GENOME098299	99.4088	1182	1734	0.681661
GUT_GENOME000434	GUT_GENOME000086	99.347	1411	1734	0.813725
GUT_GENOME000434	GUT_GENOME000208	99.2427	1486	1734	0.856978
GUT_GENOME000434	GUT_GENOME179317	99.211	1365	1734	0.787197
GUT_GENOME000434	GUT_GENOME098672	99.1423	1162	1734	0.670127
GUT_GENOME000434	GUT_GENOME034186	98.294	1163	1734	0.670704
GUT_GENOME000434	GUT_GENOME170020	98.2465	1149	1734	0.66263
GUT_GENOME000434	GUT_GENOME120028	98.1786	1141	1734	0.658016
GUT_GENOME000434	GUT_GENOME055234	98.1756	1149	1734	0.66263
GUT_GENOME000434	GUT_GENOME107090	98.1145	1235	1734	0.712226
GUT_GENOME000434	GUT_GENOME045747	98.0961	1228	1734	0.708189
GUT_GENOME000434	GUT_GENOME167970	98.0632	1146	1734	0.6609
GUT_GENOME000434	GUT_GENOME029519	98.055	1269	1734	0.731834
GUT_GENOME000434	GUT_GENOME122019	98.0395	1244	1734	0.717416
GUT_GENOME000434	GUT_GENOME148802	98.0244	1196	1734	0.689735
GUT_GENOME000434	GUT_GENOME168104	97.9926	1248	1734	0.719723
GUT_GENOME000434	GUT_GENOME120132	97.9767	1275	1734	0.735294
GUT_GENOME000434	GUT_GENOME268316	97.9736	1208	1734	0.696655
GUT_GENOME000434	GUT_GENOME166270	97.9678	1255	1734	0.72376
GUT_GENOME000434	GUT_GENOME020409	97.9566	1090	1734	0.628604
GUT_GENOME000434	GUT_GENOME136562	97.9063	1281	1734	0.738754
GUT_GENOME000434	GUT_GENOME256003	97.905	1280	1734	0.738178
GUT_GENOME000434	GUT_GENOME005956	97.8941	1055	1734	0.60842
GUT_GENOME000434	GUT_GENOME004087	97.8393	1201	1734	0.692618
GUT_GENOME000434	GUT_GENOME120250	97.8335	1284	1734	0.740484
GUT_GENOME000434	GUT_GENOME165151	97.8281	1144	1734	0.659746
GUT_GENOME000434	GUT_GENOME243801	97.8278	1205	1734	0.694925
GUT_GENOME000434	GUT_GENOME096228	97.6713	1352	1734	0.7797
GUT_GENOME000434	GUT_GENOME176873	97.633	1173	1734	0.676471
GUT_GENOME000434	GUT_GENOME096487	97.6158	1387	1734	0.799885
GUT_GENOME000434	GUT_GENOME000016	97.5563	1378	1734	0.794694
GUT_GENOME000434	GUT_GENOME004964	94.3858	875	1734	0.504614
GUT_GENOME000434	GUT_GENOME199160	94.2681	999	1734	0.576125
GUT_GENOME000434	GUT_GENOME096670	94.1369	1108	1734	0.638985
GUT_GENOME000434	GUT_GENOME088312	93.9345	1054	1734	0.607843
GUT_GENOME000434	GUT_GENOME159351	91.7364	1056	1734	0.608997
GUT_GENOME000434	GUT_GENOME097768	91.5962	1053	1734	0.607266
GUT_GENOME000434	GUT_GENOME149670	91.5916	1000	1734	0.576701
GUT_GENOME000434	GUT_GENOME152717	91.5842	1098	1734	0.633218
GUT_GENOME000434	GUT_GENOME220206	91.5791	916	1734	0.528258
GUT_GENOME000434	GUT_GENOME098408	91.577	985	1734	0.568051
GUT_GENOME000434	GUT_GENOME246487	91.5626	963	1734	0.555363
GUT_GENOME000434	GUT_GENOME097940	91.5572	1059	1734	0.610727
GUT_GENOME000434	GUT_GENOME117204	91.5557	1094	1734	0.630911
GUT_GENOME000434	GUT_GENOME046307	91.5534	1044	1734	0.602076
GUT_GENOME000434	GUT_GENOME057664	91.5527	1090	1734	0.628604
GUT_GENOME000434	GUT_GENOME229936	91.5473	1041	1734	0.600346
GUT_GENOME000434	GUT_GENOME077320	91.5364	988	1734	0.569781
GUT_GENOME000434	GUT_GENOME195156	91.5346	1079	1734	0.622261
GUT_GENOME000434	GUT_GENOME245604	91.5247	1102	1734	0.635525
GUT_GENOME000434	GUT_GENOME045324	91.5048	1063	1734	0.613033
GUT_GENOME000434	GUT_GENOME034086	91.5033	981	1734	0.565744
GUT_GENOME000434	GUT_GENOME157694	91.5027	1037	1734	0.598039
GUT_GENOME000434	GUT_GENOME097823	91.5009	950	1734	0.547866
GUT_GENOME000434	GUT_GENOME181724	91.4999	1045	1734	0.602653
GUT_GENOME000434	GUT_GENOME178516	91.4912	1071	1734	0.617647
GUT_GENOME000434	GUT_GENOME096864	91.488	1010	1734	0.582468
GUT_GENOME000434	GUT_GENOME239717	91.4877	1132	1734	0.652826
GUT_GENOME000434	GUT_GENOME045131	91.4823	1071	1734	0.617647
GUT_GENOME000434	GUT_GENOME151464	91.4802	979	1734	0.564591
GUT_GENOME000434	GUT_GENOME045504	91.4764	1084	1734	0.625144
GUT_GENOME000434	GUT_GENOME096695	91.4755	1015	1734	0.585352
GUT_GENOME000434	GUT_GENOME097996	91.4722	1071	1734	0.617647
GUT_GENOME000434	GUT_GENOME027435	91.4708	1080	1734	0.622837
GUT_GENOME000434	GUT_GENOME231061	91.4667	1041	1734	0.600346
GUT_GENOME000434	GUT_GENOME194873	91.466	1104	1734	0.636678
GUT_GENOME000434	GUT_GENOME029595	91.4603	1007	1734	0.580738
GUT_GENOME000434	GUT_GENOME095730	91.4495	1115	1734	0.643022
GUT_GENOME000434	GUT_GENOME252300	91.4489	1082	1734	0.623991
GUT_GENOME000434	GUT_GENOME243118	91.4472	1073	1734	0.6188
GUT_GENOME000434	GUT_GENOME124071	91.4464	1050	1734	0.605536
GUT_GENOME000434	GUT_GENOME185813	91.4391	1020	1734	0.588235
GUT_GENOME000434	GUT_GENOME096883	91.4376	1067	1734	0.61534
GUT_GENOME000434	GUT_GENOME065909	91.4351	1051	1734	0.606113
GUT_GENOME000434	GUT_GENOME098013	91.4347	1040	1734	0.599769
GUT_GENOME000434	GUT_GENOME225887	91.4269	1061	1734	0.61188
GUT_GENOME000434	GUT_GENOME231288	91.4265	1026	1734	0.591696
GUT_GENOME000434	GUT_GENOME155633	91.4229	1079	1734	0.622261
GUT_GENOME000434	GUT_GENOME027720	91.4228	1088	1734	0.627451
GUT_GENOME000434	GUT_GENOME185944	91.4218	1071	1734	0.617647
GUT_GENOME000434	GUT_GENOME153694	91.4208	1103	1734	0.636101
GUT_GENOME000434	GUT_GENOME185925	91.4179	1055	1734	0.60842
GUT_GENOME000434	GUT_GENOME097693	91.4165	1091	1734	0.629181
GUT_GENOME000434	GUT_GENOME158182	91.414	1100	1734	0.634371
GUT_GENOME000434	GUT_GENOME231242	91.4134	999	1734	0.576125
GUT_GENOME000434	GUT_GENOME036091	91.4106	1061	1734	0.61188
GUT_GENOME000434	GUT_GENOME095362	91.4074	1116	1734	0.643599
GUT_GENOME000434	GUT_GENOME031778	91.4047	1083	1734	0.624567
GUT_GENOME000434	GUT_GENOME001112	91.4026	1153	1734	0.664937
GUT_GENOME000434	GUT_GENOME249723	91.3958	1058	1734	0.61015
GUT_GENOME000434	GUT_GENOME001033	91.3929	1158	1734	0.66782
GUT_GENOME000434	GUT_GENOME095722	91.3929	1108	1734	0.638985
GUT_GENOME000434	GUT_GENOME045232	91.3887	1115	1734	0.643022
GUT_GENOME000434	GUT_GENOME263206	91.3883	1004	1734	0.579008
GUT_GENOME000434	GUT_GENOME034591	91.3839	1013	1734	0.584198
GUT_GENOME000434	GUT_GENOME019941	91.3816	1072	1734	0.618224
GUT_GENOME000434	GUT_GENOME152117	91.3815	1151	1734	0.663783
GUT_GENOME000434	GUT_GENOME157020	91.3789	1142	1734	0.658593
GUT_GENOME000434	GUT_GENOME261771	91.3779	1098	1734	0.633218
GUT_GENOME000434	GUT_GENOME178318	91.3774	1104	1734	0.636678
GUT_GENOME000434	GUT_GENOME052472	91.3724	1040	1734	0.599769
GUT_GENOME000434	GUT_GENOME226088	91.3714	962	1734	0.554787
GUT_GENOME000434	GUT_GENOME037030	91.3683	1082	1734	0.623991
GUT_GENOME000434	GUT_GENOME185158	91.3656	994	1734	0.573241
GUT_GENOME000434	GUT_GENOME184932	91.3552	917	1734	0.528835
GUT_GENOME000434	GUT_GENOME000823	91.3548	1160	1734	0.668973
GUT_GENOME000434	GUT_GENOME193301	91.3543	1074	1734	0.619377
GUT_GENOME000434	GUT_GENOME185659	91.3464	957	1734	0.551903
GUT_GENOME000434	GUT_GENOME058686	91.3457	1105	1734	0.637255
GUT_GENOME000434	GUT_GENOME185454	91.3413	1051	1734	0.606113
GUT_GENOME000434	GUT_GENOME248181	91.3357	1036	1734	0.597463
GUT_GENOME000434	GUT_GENOME001151	91.3355	1144	1734	0.659746
GUT_GENOME000434	GUT_GENOME030183	91.3319	1046	1734	0.60323
GUT_GENOME000434	GUT_GENOME264278	91.3314	991	1734	0.571511
GUT_GENOME000434	GUT_GENOME094359	91.3305	1132	1734	0.652826
GUT_GENOME000434	GUT_GENOME286431	91.3287	1067	1734	0.61534
GUT_GENOME000434	GUT_GENOME073659	91.3244	995	1734	0.573818
GUT_GENOME000434	GUT_GENOME073256	91.3221	1071	1734	0.617647
GUT_GENOME000434	GUT_GENOME098450	91.3148	1044	1734	0.602076
GUT_GENOME000434	GUT_GENOME140112	91.3138	1144	1734	0.659746
GUT_GENOME000434	GUT_GENOME033081	91.312	956	1734	0.551326
GUT_GENOME000434	GUT_GENOME096485	91.3108	1171	1734	0.675317
GUT_GENOME000434	GUT_GENOME244206	91.3046	1072	1734	0.618224
GUT_GENOME000434	GUT_GENOME157744	91.3003	1014	1734	0.584775
GUT_GENOME000434	GUT_GENOME035701	91.2912	1044	1734	0.602076
GUT_GENOME000434	GUT_GENOME001318	91.2895	1168	1734	0.673587
GUT_GENOME000434	GUT_GENOME097244	91.2872	1082	1734	0.623991
GUT_GENOME000434	GUT_GENOME097863	91.2823	1102	1734	0.635525
GUT_GENOME000434	GUT_GENOME095966	91.2809	1155	1734	0.66609
GUT_GENOME000434	GUT_GENOME044987	91.2808	1024	1734	0.590542
GUT_GENOME000434	GUT_GENOME062272	91.28	988	1734	0.569781
GUT_GENOME000434	GUT_GENOME098830	91.2787	955	1734	0.55075
GUT_GENOME000434	GUT_GENOME095227	91.2747	1139	1734	0.656863
GUT_GENOME000434	GUT_GENOME124434	91.2664	1048	1734	0.604383
GUT_GENOME000434	GUT_GENOME031388	91.2488	1026	1734	0.591696
GUT_GENOME000434	GUT_GENOME231790	91.2419	982	1734	0.566321
GUT_GENOME000434	GUT_GENOME029472	91.2244	986	1734	0.568627
GUT_GENOME000434	GUT_GENOME185076	91.2038	996	1734	0.574394
GUT_GENOME000434	GUT_GENOME001696	91.1785	1181	1734	0.681084
GUT_GENOME000434	GUT_GENOME156209	91.1771	1032	1734	0.595156
GUT_GENOME000434	GUT_GENOME121439	91.1698	1005	1734	0.579585
GUT_GENOME000607	GUT_GENOME000607	100	1118	1119	0.999106
GUT_GENOME000607	GUT_GENOME142625	98.0551	950	1119	0.848972
GUT_GENOME000657	GUT_GENOME000657	100	2049	2051	0.999025
GUT_GENOME000657	GUT_GENOME000181	99.3461	1802	2051	0.878596
GUT_GENOME000657	GUT_GENOME085738	99.3302	1676	2051	0.817162
GUT_GENOME000657	GUT_GENOME096486	99.2994	1799	2051	0.877133
GUT_GENOME000657	GUT_GENOME096223	99.2977	1792	2051	0.87372
GUT_GENOME000657	GUT_GENOME001135	99.2493	1831	2051	0.892735
GUT_GENOME000731	GUT_GENOME000731	100	1483	1500	0.988667
GUT_GENOME000731	GUT_GENOME000207	99.4577	1310	1500	0.873333
GUT_GENOME000731	GUT_GENOME103835	99.4577	1310	1500	0.873333
GUT_GENOME000731	GUT_GENOME231261	99.4321	1096	1500	0.730667
GUT_GENOME000731	GUT_GENOME096178	99.4081	1352	1500	0.901333
GUT_GENOME000731	GUT_GENOME231240	99.3802	1263	1500	0.842
GUT_GENOME000731	GUT_GENOME097824	99.3694	1170	1500	0.78
GUT_GENOME000731	GUT_GENOME170024	99.2849	1141	1500	0.760667
GUT_GENOME000731	GUT_GENOME120046	99.2804	1080	1500	0.72
GUT_GENOME000731	GUT_GENOME230893	99.2354	1146	1500	0.764
GUT_GENOME000731	GUT_GENOME097722	99.2149	1157	1500	0.771333
GUT_GENOME000731	GUT_GENOME121971	99.2046	1173	1500	0.782
GUT_GENOME000731	GUT_GENOME158534	99.2005	1123	1500	0.748667
GUT_GENOME000731	GUT_GENOME185150	99.1631	1104	1500	0.736
GUT_GENOME000731	GUT_GENOME098374	99.1512	1186	1500	0.790667
GUT_GENOME000731	GUT_GENOME098667	99.1506	1179	1500	0.786
GUT_GENOME000731	GUT_GENOME262783	99.1396	1146	1500	0.764
GUT_GENOME000731	GUT_GENOME185315	99.133	1058	1500	0.705333
GUT_GENOME000731	GUT_GENOME264495	99.1323	1125	1500	0.75
GUT_GENOME000731	GUT_GENOME194348	99.1229	1166	1500	0.777333
GUT_GENOME000731	GUT_GENOME185780	99.122	1132	1500	0.754667
GUT_GENOME000731	GUT_GENOME097753	99.1197	1160	1500	0.773333
GUT_GENOME000731	GUT_GENOME148801	99.1002	1192	1500	0.794667
GUT_GENOME000731	GUT_GENOME186027	99.0925	1098	1500	0.732
GUT_GENOME000731	GUT_GENOME185608	99.0894	1114	1500	0.742667
GUT_GENOME000731	GUT_GENOME246243	99.0798	1149	1500	0.766
GUT_GENOME000731	GUT_GENOME097943	99.0762	1177	1500	0.784667
GUT_GENOME000731	GUT_GENOME045211	99.0703	1120	1500	0.746667
GUT_GENOME000731	GUT_GENOME001733	99.0575	1277	1500	0.851333
GUT_GENOME000731	GUT_GENOME097780	99.0571	1203	1500	0.802
GUT_GENOME000731	GUT_GENOME192013	99.0552	1156	1500	0.770667
GUT_GENOME000731	GUT_GENOME098776	99.0462	1231	1500	0.820667
GUT_GENOME000731	GUT_GENOME096649	99.0426	1134	1500	0.756
GUT_GENOME000731	GUT_GENOME045924	99.0365	1134	1500	0.756
GUT_GENOME000731	GUT_GENOME062271	99.0196	1102	1500	0.734667
GUT_GENOME000731	GUT_GENOME098147	99.0184	1199	1500	0.799333
GUT_GENOME000731	GUT_GENOME045452	99.0177	1024	1500	0.682667
GUT_GENOME000731	GUT_GENOME000052	99.004	1277	1500	0.851333
GUT_GENOME000731	GUT_GENOME045404	98.9971	1212	1500	0.808
GUT_GENOME000731	GUT_GENOME175155	98.9904	1173	1500	0.782
GUT_GENOME000731	GUT_GENOME150044	98.9717	1207	1500	0.804667
GUT_GENOME000731	GUT_GENOME256000	98.9683	1081	1500	0.720667
GUT_GENOME000731	GUT_GENOME143134	98.9653	1321	1500	0.880667
GUT_GENOME000731	GUT_GENOME096177	98.9439	1323	1500	0.882
GUT_GENOME000731	GUT_GENOME098445	98.9391	1098	1500	0.732
GUT_GENOME000731	GUT_GENOME000255	98.9156	1293	1500	0.862
GUT_GENOME000731	GUT_GENOME091913	98.9045	1163	1500	0.775333
GUT_GENOME000731	GUT_GENOME140041	98.8999	1268	1500	0.845333
GUT_GENOME000731	GUT_GENOME262395	98.897	1121	1500	0.747333
GUT_GENOME000731	GUT_GENOME066014	98.8905	1136	1500	0.757333
GUT_GENOME000731	GUT_GENOME165415	98.881	1227	1500	0.818
GUT_GENOME000731	GUT_GENOME062686	98.876	1060	1500	0.706667
GUT_GENOME000731	GUT_GENOME096225	98.8549	1314	1500	0.876
GUT_GENOME000731	GUT_GENOME005495	96.8873	992	1500	0.661333
GUT_GENOME000750	GUT_GENOME000750	100	2051	2053	0.999026
GUT_GENOME000750	GUT_GENOME185653	99.8275	1850	2053	0.90112
GUT_GENOME000750	GUT_GENOME185624	99.8162	1863	2053	0.907453
GUT_GENOME000750	GUT_GENOME097723	99.8098	1749	2053	0.851924
GUT_GENOME000750	GUT_GENOME078951	99.7157	1758	2053	0.856308
GUT_GENOME000750	GUT_GENOME034176	94.759	1616	2053	0.787141
GUT_GENOME000750	GUT_GENOME000931	94.6203	1716	2053	0.83585
GUT_GENOME000750	GUT_GENOME286530	94.5125	1560	2053	0.759864
GUT_GENOME000750	GUT_GENOME097925	94.4344	1598	2053	0.778373
GUT_GENOME000823	GUT_GENOME000823	100	2110	2113	0.99858
GUT_GENOME000823	GUT_GENOME001112	99.8971	1966	2113	0.930431
GUT_GENOME000823	GUT_GENOME153694	99.8186	1773	2113	0.839091
GUT_GENOME000823	GUT_GENOME045324	99.7892	1703	2113	0.805963
GUT_GENOME000823	GUT_GENOME178516	99.7802	1731	2113	0.819214
GUT_GENOME000823	GUT_GENOME034591	99.7577	1653	2113	0.7823
GUT_GENOME000823	GUT_GENOME046307	99.6563	1593	2113	0.753904
GUT_GENOME000823	GUT_GENOME246487	99.6364	1460	2113	0.690961
GUT_GENOME000823	GUT_GENOME001033	99.6304	1889	2113	0.89399
GUT_GENOME000823	GUT_GENOME097996	99.6176	1682	2113	0.796025
GUT_GENOME000823	GUT_GENOME045232	99.5852	1761	2113	0.833412
GUT_GENOME000823	GUT_GENOME263206	99.4752	1530	2113	0.724089
GUT_GENOME000823	GUT_GENOME097823	99.3996	1434	2113	0.678656
GUT_GENOME000823	GUT_GENOME226088	99.3452	1449	2113	0.685755
GUT_GENOME000823	GUT_GENOME045504	99.2341	1673	2113	0.791765
GUT_GENOME000823	GUT_GENOME194873	99.2163	1643	2113	0.777567
GUT_GENOME000823	GUT_GENOME097693	99.2101	1657	2113	0.784193
GUT_GENOME000823	GUT_GENOME225887	99.1967	1624	2113	0.768575
GUT_GENOME000823	GUT_GENOME231242	99.1739	1502	2113	0.710838
GUT_GENOME000823	GUT_GENOME029595	99.1718	1498	2113	0.708945
GUT_GENOME000823	GUT_GENOME195156	99.1673	1608	2113	0.761003
GUT_GENOME000823	GUT_GENOME065909	99.154	1597	2113	0.755797
GUT_GENOME000823	GUT_GENOME098013	99.1526	1543	2113	0.730241
GUT_GENOME000823	GUT_GENOME229936	99.151	1543	2113	0.730241
GUT_GENOME000823	GUT_GENOME158182	99.147	1637	2113	0.774728
GUT_GENOME000823	GUT_GENOME096883	99.1444	1626	2113	0.769522
GUT_GENOME000823	GUT_GENOME239717	99.1404	1779	2113	0.841931
GUT_GENOME000823	GUT_GENOME185944	99.1389	1616	2113	0.764789
GUT_GENOME000823	GUT_GENOME034086	99.132	1501	2113	0.710364
GUT_GENOME000823	GUT_GENOME261771	99.1295	1646	2113	0.778987
GUT_GENOME000823	GUT_GENOME019941	99.126	1613	2113	0.76337
GUT_GENOME000823	GUT_GENOME096864	99.1098	1524	2113	0.721249
GUT_GENOME000823	GUT_GENOME231288	99.0997	1509	2113	0.71415
GUT_GENOME000823	GUT_GENOME185454	99.0975	1596	2113	0.755324
GUT_GENOME000823	GUT_GENOME001696	99.0969	1771	2113	0.838145
GUT_GENOME000823	GUT_GENOME031778	99.0962	1663	2113	0.787033
GUT_GENOME000823	GUT_GENOME157694	99.0912	1522	2113	0.720303
GUT_GENOME000823	GUT_GENOME155633	99.0891	1686	2113	0.797918
GUT_GENOME000823	GUT_GENOME097768	99.0854	1598	2113	0.756271
GUT_GENOME000823	GUT_GENOME029472	99.0824	1506	2113	0.712731
GUT_GENOME000823	GUT_GENOME097244	99.0813	1623	2113	0.768102
GUT_GENOME000823	GUT_GENOME185925	99.079	1594	2113	0.754378
GUT_GENOME000823	GUT_GENOME157744	99.0763	1522	2113	0.720303
GUT_GENOME000823	GUT_GENOME095730	99.0736	1733	2113	0.820161
GUT_GENOME000823	GUT_GENOME097863	99.0667	1682	2113	0.796025
GUT_GENOME000823	GUT_GENOME095722	99.0513	1693	2113	0.80123
GUT_GENOME000823	GUT_GENOME149670	99.0449	1525	2113	0.721723
GUT_GENOME000823	GUT_GENOME057664	99.0363	1666	2113	0.788452
GUT_GENOME000823	GUT_GENOME124071	99.0291	1581	2113	0.748225
GUT_GENOME000823	GUT_GENOME097940	99.0195	1599	2113	0.756744
GUT_GENOME000823	GUT_GENOME096485	99.017	1816	2113	0.859442
GUT_GENOME000823	GUT_GENOME077320	98.9939	1462	2113	0.691907
GUT_GENOME000823	GUT_GENOME140112	98.9935	1733	2113	0.820161
GUT_GENOME000823	GUT_GENOME152117	98.9928	1703	2113	0.805963
GUT_GENOME000823	GUT_GENOME027435	98.9926	1603	2113	0.758637
GUT_GENOME000823	GUT_GENOME098408	98.9921	1459	2113	0.690487
GUT_GENOME000823	GUT_GENOME185813	98.9917	1502	2113	0.710838
GUT_GENOME000823	GUT_GENOME095966	98.9839	1794	2113	0.84903
GUT_GENOME000823	GUT_GENOME058686	98.978	1693	2113	0.80123
GUT_GENOME000823	GUT_GENOME178318	98.9543	1628	2113	0.770469
GUT_GENOME000823	GUT_GENOME252300	98.9427	1594	2113	0.754378
GUT_GENOME000823	GUT_GENOME193301	98.9383	1624	2113	0.768575
GUT_GENOME000823	GUT_GENOME231790	98.9333	1536	2113	0.726929
GUT_GENOME000823	GUT_GENOME220206	98.9305	1248	2113	0.590629
GUT_GENOME000823	GUT_GENOME044987	98.9241	1452	2113	0.687175
GUT_GENOME000823	GUT_GENOME117204	98.8867	1618	2113	0.765736
GUT_GENOME000823	GUT_GENOME037030	98.8714	1618	2113	0.765736
GUT_GENOME000823	GUT_GENOME124434	98.8691	1510	2113	0.714624
GUT_GENOME000823	GUT_GENOME095362	98.8556	1635	2113	0.773781
GUT_GENOME000823	GUT_GENOME095227	98.8447	1685	2113	0.797444
GUT_GENOME000823	GUT_GENOME181724	97.8924	1488	2113	0.704212
GUT_GENOME000823	GUT_GENOME159351	97.7168	1460	2113	0.690961
GUT_GENOME000823	GUT_GENOME033081	97.4875	1370	2113	0.648367
GUT_GENOME000823	GUT_GENOME036091	97.4351	1515	2113	0.71699
GUT_GENOME000823	GUT_GENOME185076	97.4167	1460	2113	0.690961
GUT_GENOME000823	GUT_GENOME035701	97.4142	1494	2113	0.707052
GUT_GENOME000823	GUT_GENOME231061	97.384	1509	2113	0.71415
GUT_GENOME000823	GUT_GENOME248181	97.362	1511	2113	0.715097
GUT_GENOME000823	GUT_GENOME027720	97.3489	1603	2113	0.758637
GUT_GENOME000823	GUT_GENOME249723	97.3312	1553	2113	0.734974
GUT_GENOME000823	GUT_GENOME073659	97.3279	1484	2113	0.702319
GUT_GENOME000823	GUT_GENOME151464	97.325	1366	2113	0.646474
GUT_GENOME000823	GUT_GENOME264278	97.3218	1405	2113	0.664931
GUT_GENOME000823	GUT_GENOME245604	97.3107	1568	2113	0.742073
GUT_GENOME000823	GUT_GENOME045131	97.3094	1526	2113	0.722196
GUT_GENOME000823	GUT_GENOME001318	97.3067	1679	2113	0.794605
GUT_GENOME000823	GUT_GENOME030183	97.2877	1471	2113	0.696167
GUT_GENOME000823	GUT_GENOME152717	97.2862	1579	2113	0.747279
GUT_GENOME000823	GUT_GENOME243118	97.2781	1526	2113	0.722196
GUT_GENOME000823	GUT_GENOME157020	97.2303	1596	2113	0.755324
GUT_GENOME000823	GUT_GENOME096695	97.219	1456	2113	0.689068
GUT_GENOME000823	GUT_GENOME031388	97.2159	1431	2113	0.677236
GUT_GENOME000823	GUT_GENOME052472	97.2089	1522	2113	0.720303
GUT_GENOME000823	GUT_GENOME098450	97.2042	1480	2113	0.700426
GUT_GENOME000823	GUT_GENOME185158	97.1936	1404	2113	0.664458
GUT_GENOME000823	GUT_GENOME094359	97.184	1616	2113	0.764789
GUT_GENOME000823	GUT_GENOME156209	97.1757	1490	2113	0.705159
GUT_GENOME000823	GUT_GENOME073256	97.1755	1515	2113	0.71699
GUT_GENOME000823	GUT_GENOME001151	97.174	1703	2113	0.805963
GUT_GENOME000823	GUT_GENOME244206	97.1642	1490	2113	0.705159
GUT_GENOME000823	GUT_GENOME185659	97.1638	1361	2113	0.644108
GUT_GENOME000823	GUT_GENOME121439	97.1344	1466	2113	0.6938
GUT_GENOME000823	GUT_GENOME062272	97.1234	1393	2113	0.659252
GUT_GENOME000823	GUT_GENOME184932	97.113	1330	2113	0.629437
GUT_GENOME000823	GUT_GENOME286431	97.1061	1505	2113	0.712257
GUT_GENOME000823	GUT_GENOME098830	97.102	1389	2113	0.657359
GUT_GENOME000823	GUT_GENOME096670	91.8503	1000	2113	0.473261
GUT_GENOME000823	GUT_GENOME199160	91.7903	905	2113	0.428301
GUT_GENOME000823	GUT_GENOME088312	91.7641	970	2113	0.459063
GUT_GENOME000823	GUT_GENOME074771	91.5392	1104	2113	0.52248
GUT_GENOME000823	GUT_GENOME179340	91.4833	1012	2113	0.47894
GUT_GENOME000823	GUT_GENOME073769	91.4641	1080	2113	0.511122
GUT_GENOME000823	GUT_GENOME098299	91.4572	1075	2113	0.508755
GUT_GENOME000823	GUT_GENOME045747	91.3777	1146	2113	0.542357
GUT_GENOME000823	GUT_GENOME120028	91.3698	1071	2113	0.506862
GUT_GENOME000823	GUT_GENOME000086	91.3565	1164	2113	0.550876
GUT_GENOME000823	GUT_GENOME170020	91.353	1070	2113	0.506389
GUT_GENOME000823	GUT_GENOME256003	91.3314	1174	2113	0.555608
GUT_GENOME000823	GUT_GENOME029519	91.3084	1157	2113	0.547563
GUT_GENOME000823	GUT_GENOME136948	91.293	1108	2113	0.524373
GUT_GENOME000823	GUT_GENOME136562	91.2818	1187	2113	0.561761
GUT_GENOME000823	GUT_GENOME000208	91.2808	1217	2113	0.575958
GUT_GENOME000823	GUT_GENOME120132	91.2765	1171	2113	0.554188
GUT_GENOME000823	GUT_GENOME120250	91.2704	1195	2113	0.565547
GUT_GENOME000823	GUT_GENOME000434	91.2649	1173	2113	0.555135
GUT_GENOME000823	GUT_GENOME107090	91.2628	1138	2113	0.538571
GUT_GENOME000823	GUT_GENOME098087	91.2558	1125	2113	0.532418
GUT_GENOME000823	GUT_GENOME005956	91.2516	1005	2113	0.475627
GUT_GENOME000823	GUT_GENOME096228	91.2371	1259	2113	0.595835
GUT_GENOME000823	GUT_GENOME004087	91.2349	1092	2113	0.516801
GUT_GENOME000823	GUT_GENOME168104	91.2303	1142	2113	0.540464
GUT_GENOME000823	GUT_GENOME098672	91.228	960	2113	0.45433
GUT_GENOME000823	GUT_GENOME148802	91.2192	1145	2113	0.541884
GUT_GENOME000823	GUT_GENOME167970	91.219	1070	2113	0.506389
GUT_GENOME000823	GUT_GENOME000016	91.2186	1253	2113	0.592996
GUT_GENOME000823	GUT_GENOME055234	91.2177	1078	2113	0.510175
GUT_GENOME000823	GUT_GENOME179317	91.2102	1130	2113	0.534785
GUT_GENOME000823	GUT_GENOME122019	91.2101	1182	2113	0.559394
GUT_GENOME000823	GUT_GENOME034186	91.2084	1088	2113	0.514908
GUT_GENOME000823	GUT_GENOME243801	91.1998	1108	2113	0.524373
GUT_GENOME000823	GUT_GENOME176873	91.1965	1060	2113	0.501656
GUT_GENOME000823	GUT_GENOME096487	91.1964	1240	2113	0.586843
GUT_GENOME000823	GUT_GENOME268316	91.1758	1127	2113	0.533365
GUT_GENOME000823	GUT_GENOME166270	91.105	1159	2113	0.548509
GUT_GENOME000823	GUT_GENOME165151	91.0305	1051	2113	0.497397
GUT_GENOME000823	GUT_GENOME020409	90.9663	1008	2113	0.477047
GUT_GENOME000931	GUT_GENOME000931	100	2135	2140	0.997664
GUT_GENOME000931	GUT_GENOME034176	98.2542	1762	2140	0.823364
GUT_GENOME000931	GUT_GENOME286530	98.1753	1647	2140	0.769626
GUT_GENOME000931	GUT_GENOME097925	98.0942	1641	2140	0.766822
GUT_GENOME000931	GUT_GENOME097723	94.554	1552	2140	0.725234
GUT_GENOME000931	GUT_GENOME000750	94.5537	1729	2140	0.807944
GUT_GENOME000931	GUT_GENOME185624	94.537	1638	2140	0.765421
GUT_GENOME000931	GUT_GENOME078951	94.5237	1535	2140	0.71729
GUT_GENOME000931	GUT_GENOME185653	94.503	1647	2140	0.769626
GUT_GENOME001033	GUT_GENOME001033	100	2110	2110	1
GUT_GENOME001033	GUT_GENOME246487	99.8026	1478	2110	0.700474
GUT_GENOME001033	GUT_GENOME045324	99.7663	1655	2110	0.78436
GUT_GENOME001033	GUT_GENOME153694	99.7468	1702	2110	0.806635
GUT_GENOME001033	GUT_GENOME034591	99.7432	1592	2110	0.754502
GUT_GENOME001033	GUT_GENOME001112	99.7359	1892	2110	0.896682
GUT_GENOME001033	GUT_GENOME046307	99.6889	1585	2110	0.751185
GUT_GENOME001033	GUT_GENOME097996	99.6847	1664	2110	0.788626
GUT_GENOME001033	GUT_GENOME045232	99.6736	1791	2110	0.848815
GUT_GENOME001033	GUT_GENOME178516	99.6301	1691	2110	0.801422
GUT_GENOME001033	GUT_GENOME000823	99.6278	1893	2110	0.897156
GUT_GENOME001033	GUT_GENOME263206	99.6075	1536	2110	0.727962
GUT_GENOME001033	GUT_GENOME097823	99.386	1437	2110	0.681043
GUT_GENOME001033	GUT_GENOME226088	99.3709	1449	2110	0.68673
GUT_GENOME001033	GUT_GENOME057664	99.2378	1635	2110	0.774882
GUT_GENOME001033	GUT_GENOME034086	99.2093	1489	2110	0.705687
GUT_GENOME001033	GUT_GENOME194873	99.2015	1621	2110	0.768246
GUT_GENOME001033	GUT_GENOME185454	99.1902	1586	2110	0.751659
GUT_GENOME001033	GUT_GENOME185925	99.189	1597	2110	0.756872
GUT_GENOME001033	GUT_GENOME098013	99.1867	1570	2110	0.744076
GUT_GENOME001033	GUT_GENOME019941	99.186	1627	2110	0.77109
GUT_GENOME001033	GUT_GENOME045504	99.1813	1633	2110	0.773934
GUT_GENOME001033	GUT_GENOME185944	99.1812	1617	2110	0.766351
GUT_GENOME001033	GUT_GENOME157694	99.1753	1469	2110	0.696209
GUT_GENOME001033	GUT_GENOME095722	99.173	1656	2110	0.784834
GUT_GENOME001033	GUT_GENOME158182	99.1722	1665	2110	0.7891
GUT_GENOME001033	GUT_GENOME229936	99.1672	1569	2110	0.743602
GUT_GENOME001033	GUT_GENOME095730	99.1638	1734	2110	0.821801
GUT_GENOME001033	GUT_GENOME185813	99.141	1483	2110	0.702844
GUT_GENOME001033	GUT_GENOME261771	99.1346	1672	2110	0.792417
GUT_GENOME001033	GUT_GENOME029595	99.1264	1507	2110	0.714218
GUT_GENOME001033	GUT_GENOME231242	99.123	1515	2110	0.718009
GUT_GENOME001033	GUT_GENOME225887	99.1174	1607	2110	0.761611
GUT_GENOME001033	GUT_GENOME096864	99.0999	1524	2110	0.722275
GUT_GENOME001033	GUT_GENOME097768	99.0988	1570	2110	0.744076
GUT_GENOME001033	GUT_GENOME239717	99.0985	1740	2110	0.824645
GUT_GENOME001033	GUT_GENOME124071	99.0913	1587	2110	0.752133
GUT_GENOME001033	GUT_GENOME149670	99.0912	1494	2110	0.708057
GUT_GENOME001033	GUT_GENOME031778	99.0903	1602	2110	0.759242
GUT_GENOME001033	GUT_GENOME096883	99.0858	1622	2110	0.76872
GUT_GENOME001033	GUT_GENOME027435	99.0783	1568	2110	0.743128
GUT_GENOME001033	GUT_GENOME231288	99.0782	1518	2110	0.719431
GUT_GENOME001033	GUT_GENOME095966	99.0765	1800	2110	0.853081
GUT_GENOME001033	GUT_GENOME097693	99.0672	1666	2110	0.789573
GUT_GENOME001033	GUT_GENOME097244	99.0653	1629	2110	0.772038
GUT_GENOME001033	GUT_GENOME065909	99.0647	1559	2110	0.738863
GUT_GENOME001033	GUT_GENOME155633	99.058	1671	2110	0.791943
GUT_GENOME001033	GUT_GENOME157744	99.0571	1515	2110	0.718009
GUT_GENOME001033	GUT_GENOME195156	99.0526	1656	2110	0.784834
GUT_GENOME001033	GUT_GENOME029472	99.0344	1475	2110	0.699052
GUT_GENOME001033	GUT_GENOME001696	99.0324	1784	2110	0.845498
GUT_GENOME001033	GUT_GENOME096485	99.0309	1838	2110	0.87109
GUT_GENOME001033	GUT_GENOME231790	99.0194	1499	2110	0.710427
GUT_GENOME001033	GUT_GENOME097863	99.0141	1651	2110	0.782464
GUT_GENOME001033	GUT_GENOME058686	99.0004	1666	2110	0.789573
GUT_GENOME001033	GUT_GENOME152117	98.9902	1721	2110	0.81564
GUT_GENOME001033	GUT_GENOME097940	98.9685	1590	2110	0.753555
GUT_GENOME001033	GUT_GENOME077320	98.9438	1455	2110	0.689573
GUT_GENOME001033	GUT_GENOME220206	98.9304	1246	2110	0.590521
GUT_GENOME001033	GUT_GENOME140112	98.9049	1782	2110	0.84455
GUT_GENOME001033	GUT_GENOME098408	98.8983	1443	2110	0.683886
GUT_GENOME001033	GUT_GENOME178318	98.8923	1647	2110	0.780569
GUT_GENOME001033	GUT_GENOME117204	98.8578	1601	2110	0.758768
GUT_GENOME001033	GUT_GENOME044987	98.8578	1444	2110	0.68436
GUT_GENOME001033	GUT_GENOME193301	98.851	1609	2110	0.762559
GUT_GENOME001033	GUT_GENOME252300	98.8351	1596	2110	0.756398
GUT_GENOME001033	GUT_GENOME124434	98.827	1492	2110	0.707109
GUT_GENOME001033	GUT_GENOME095362	98.8244	1617	2110	0.766351
GUT_GENOME001033	GUT_GENOME095227	98.8227	1676	2110	0.794313
GUT_GENOME001033	GUT_GENOME037030	98.8223	1594	2110	0.75545
GUT_GENOME001033	GUT_GENOME181724	97.8661	1454	2110	0.6891
GUT_GENOME001033	GUT_GENOME159351	97.6704	1473	2110	0.698104
GUT_GENOME001033	GUT_GENOME036091	97.4969	1521	2110	0.720853
GUT_GENOME001033	GUT_GENOME033081	97.4566	1352	2110	0.640758
GUT_GENOME001033	GUT_GENOME035701	97.3805	1500	2110	0.7109
GUT_GENOME001033	GUT_GENOME244206	97.3347	1503	2110	0.712322
GUT_GENOME001033	GUT_GENOME152717	97.3184	1550	2110	0.734597
GUT_GENOME001033	GUT_GENOME185076	97.3174	1421	2110	0.67346
GUT_GENOME001033	GUT_GENOME001318	97.3173	1679	2110	0.795735
GUT_GENOME001033	GUT_GENOME249723	97.2745	1490	2110	0.706161
GUT_GENOME001033	GUT_GENOME151464	97.2684	1373	2110	0.650711
GUT_GENOME001033	GUT_GENOME264278	97.2573	1361	2110	0.645024
GUT_GENOME001033	GUT_GENOME073659	97.2504	1451	2110	0.687678
GUT_GENOME001033	GUT_GENOME094359	97.243	1611	2110	0.763507
GUT_GENOME001033	GUT_GENOME045131	97.2374	1491	2110	0.706635
GUT_GENOME001033	GUT_GENOME243118	97.2337	1512	2110	0.716588
GUT_GENOME001033	GUT_GENOME248181	97.2334	1435	2110	0.680095
GUT_GENOME001033	GUT_GENOME185158	97.231	1396	2110	0.661611
GUT_GENOME001033	GUT_GENOME185659	97.2296	1336	2110	0.633175
GUT_GENOME001033	GUT_GENOME231061	97.2215	1489	2110	0.705687
GUT_GENOME001033	GUT_GENOME052472	97.22	1477	2110	0.7
GUT_GENOME001033	GUT_GENOME245604	97.2076	1562	2110	0.740284
GUT_GENOME001033	GUT_GENOME157020	97.2065	1607	2110	0.761611
GUT_GENOME001033	GUT_GENOME027720	97.1966	1574	2110	0.745972
GUT_GENOME001033	GUT_GENOME096695	97.1964	1426	2110	0.675829
GUT_GENOME001033	GUT_GENOME030183	97.182	1473	2110	0.698104
GUT_GENOME001033	GUT_GENOME121439	97.1723	1432	2110	0.678673
GUT_GENOME001033	GUT_GENOME073256	97.1632	1512	2110	0.716588
GUT_GENOME001033	GUT_GENOME031388	97.1335	1423	2110	0.674408
GUT_GENOME001033	GUT_GENOME286431	97.1257	1481	2110	0.701896
GUT_GENOME001033	GUT_GENOME062272	97.1219	1398	2110	0.662559
GUT_GENOME001033	GUT_GENOME098450	97.1102	1478	2110	0.700474
GUT_GENOME001033	GUT_GENOME001151	97.0606	1654	2110	0.783886
GUT_GENOME001033	GUT_GENOME098830	97.0437	1389	2110	0.658294
GUT_GENOME001033	GUT_GENOME156209	97.0403	1460	2110	0.691943
GUT_GENOME001033	GUT_GENOME184932	97.0273	1311	2110	0.621327
GUT_GENOME001033	GUT_GENOME199160	91.9501	899	2110	0.426066
GUT_GENOME001033	GUT_GENOME088312	91.888	961	2110	0.45545
GUT_GENOME001033	GUT_GENOME096670	91.8512	988	2110	0.468246
GUT_GENOME001033	GUT_GENOME120250	91.6618	1208	2110	0.572512
GUT_GENOME001033	GUT_GENOME120028	91.5376	1051	2110	0.498104
GUT_GENOME001033	GUT_GENOME166270	91.5283	1171	2110	0.554976
GUT_GENOME001033	GUT_GENOME098299	91.519	1055	2110	0.5
GUT_GENOME001033	GUT_GENOME029519	91.5135	1134	2110	0.537441
GUT_GENOME001033	GUT_GENOME179340	91.5065	1007	2110	0.477251
GUT_GENOME001033	GUT_GENOME167970	91.5021	1079	2110	0.511374
GUT_GENOME001033	GUT_GENOME074771	91.4714	1114	2110	0.527962
GUT_GENOME001033	GUT_GENOME096487	91.4627	1253	2110	0.593839
GUT_GENOME001033	GUT_GENOME168104	91.4559	1134	2110	0.537441
GUT_GENOME001033	GUT_GENOME034186	91.4415	1083	2110	0.51327
GUT_GENOME001033	GUT_GENOME122019	91.4331	1187	2110	0.562559
GUT_GENOME001033	GUT_GENOME170020	91.4214	1061	2110	0.502844
GUT_GENOME001033	GUT_GENOME055234	91.4125	1067	2110	0.505687
GUT_GENOME001033	GUT_GENOME045747	91.3933	1140	2110	0.540284
GUT_GENOME001033	GUT_GENOME120132	91.3913	1146	2110	0.543128
GUT_GENOME001033	GUT_GENOME073769	91.3799	1068	2110	0.506161
GUT_GENOME001033	GUT_GENOME000016	91.3786	1247	2110	0.590995
GUT_GENOME001033	GUT_GENOME268316	91.3674	1118	2110	0.529858
GUT_GENOME001033	GUT_GENOME005956	91.3669	992	2110	0.470142
GUT_GENOME001033	GUT_GENOME096228	91.3666	1229	2110	0.582464
GUT_GENOME001033	GUT_GENOME136562	91.357	1172	2110	0.55545
GUT_GENOME001033	GUT_GENOME107090	91.356	1135	2110	0.537915
GUT_GENOME001033	GUT_GENOME136948	91.3544	1085	2110	0.514218
GUT_GENOME001033	GUT_GENOME256003	91.3491	1164	2110	0.551659
GUT_GENOME001033	GUT_GENOME098672	91.3452	953	2110	0.451659
GUT_GENOME001033	GUT_GENOME243801	91.3382	1095	2110	0.518957
GUT_GENOME001033	GUT_GENOME004087	91.3248	1085	2110	0.514218
GUT_GENOME001033	GUT_GENOME000086	91.3203	1166	2110	0.552607
GUT_GENOME001033	GUT_GENOME000208	91.3037	1180	2110	0.559242
GUT_GENOME001033	GUT_GENOME165151	91.2853	1048	2110	0.496682
GUT_GENOME001033	GUT_GENOME098087	91.2817	1117	2110	0.529384
GUT_GENOME001033	GUT_GENOME148802	91.2769	1153	2110	0.546445
GUT_GENOME001033	GUT_GENOME179317	91.2768	1138	2110	0.539336
GUT_GENOME001033	GUT_GENOME176873	91.1976	1059	2110	0.501896
GUT_GENOME001033	GUT_GENOME000434	91.1373	1183	2110	0.560664
GUT_GENOME001033	GUT_GENOME020409	91.0732	1000	2110	0.473934
GUT_GENOME001112	GUT_GENOME001112	100	2022	2022	1
GUT_GENOME001112	GUT_GENOME000823	99.9132	1966	2022	0.972305
GUT_GENOME001112	GUT_GENOME153694	99.8504	1748	2022	0.864491
GUT_GENOME001112	GUT_GENOME045324	99.8477	1664	2022	0.822948
GUT_GENOME001112	GUT_GENOME178516	99.8372	1714	2022	0.847676
GUT_GENOME001112	GUT_GENOME034591	99.8088	1592	2022	0.787339
GUT_GENOME001112	GUT_GENOME001033	99.7396	1895	2022	0.937191
GUT_GENOME001112	GUT_GENOME045232	99.7048	1749	2022	0.864985
GUT_GENOME001112	GUT_GENOME246487	99.6883	1452	2022	0.718101
GUT_GENOME001112	GUT_GENOME097996	99.6684	1642	2022	0.812067
GUT_GENOME001112	GUT_GENOME046307	99.6598	1574	2022	0.778437
GUT_GENOME001112	GUT_GENOME263206	99.5739	1510	2022	0.746785
GUT_GENOME001112	GUT_GENOME226088	99.4165	1414	2022	0.699308
GUT_GENOME001112	GUT_GENOME097823	99.358	1439	2022	0.711672
GUT_GENOME001112	GUT_GENOME225887	99.2539	1619	2022	0.800692
GUT_GENOME001112	GUT_GENOME097693	99.2413	1636	2022	0.8091
GUT_GENOME001112	GUT_GENOME231242	99.2331	1495	2022	0.739367
GUT_GENOME001112	GUT_GENOME195156	99.2183	1599	2022	0.790801
GUT_GENOME001112	GUT_GENOME045504	99.2121	1658	2022	0.81998
GUT_GENOME001112	GUT_GENOME194873	99.2113	1637	2022	0.809594
GUT_GENOME001112	GUT_GENOME185925	99.1994	1578	2022	0.780415
GUT_GENOME001112	GUT_GENOME158182	99.1953	1637	2022	0.809594
GUT_GENOME001112	GUT_GENOME029595	99.188	1504	2022	0.743818
GUT_GENOME001112	GUT_GENOME155633	99.1815	1660	2022	0.820969
GUT_GENOME001112	GUT_GENOME096883	99.1797	1623	2022	0.802671
GUT_GENOME001112	GUT_GENOME231288	99.1739	1511	2022	0.74728
GUT_GENOME001112	GUT_GENOME185944	99.1617	1607	2022	0.794758
GUT_GENOME001112	GUT_GENOME185454	99.1535	1580	2022	0.781405
GUT_GENOME001112	GUT_GENOME097768	99.1463	1565	2022	0.773986
GUT_GENOME001112	GUT_GENOME019941	99.135	1607	2022	0.794758
GUT_GENOME001112	GUT_GENOME157744	99.1331	1518	2022	0.750742
GUT_GENOME001112	GUT_GENOME261771	99.1265	1649	2022	0.815529
GUT_GENOME001112	GUT_GENOME229936	99.1259	1529	2022	0.756182
GUT_GENOME001112	GUT_GENOME031778	99.1253	1630	2022	0.806133
GUT_GENOME001112	GUT_GENOME098013	99.1244	1537	2022	0.760138
GUT_GENOME001112	GUT_GENOME097940	99.1225	1564	2022	0.773492
GUT_GENOME001112	GUT_GENOME185813	99.1212	1475	2022	0.729476
GUT_GENOME001112	GUT_GENOME097863	99.1182	1649	2022	0.815529
GUT_GENOME001112	GUT_GENOME029472	99.1171	1478	2022	0.730959
GUT_GENOME001112	GUT_GENOME065909	99.1167	1573	2022	0.777943
GUT_GENOME001112	GUT_GENOME096864	99.1153	1521	2022	0.752226
GUT_GENOME001112	GUT_GENOME027435	99.102	1575	2022	0.778932
GUT_GENOME001112	GUT_GENOME057664	99.1014	1626	2022	0.804154
GUT_GENOME001112	GUT_GENOME124071	99.0905	1560	2022	0.771513
GUT_GENOME001112	GUT_GENOME157694	99.0904	1494	2022	0.738872
GUT_GENOME001112	GUT_GENOME034086	99.0875	1477	2022	0.730465
GUT_GENOME001112	GUT_GENOME097244	99.0786	1632	2022	0.807122
GUT_GENOME001112	GUT_GENOME178318	99.0755	1594	2022	0.788328
GUT_GENOME001112	GUT_GENOME058686	99.0736	1682	2022	0.83185
GUT_GENOME001112	GUT_GENOME149670	99.062	1512	2022	0.747774
GUT_GENOME001112	GUT_GENOME231790	99.0558	1510	2022	0.746785
GUT_GENOME001112	GUT_GENOME001696	99.0551	1746	2022	0.863501
GUT_GENOME001112	GUT_GENOME239717	99.0519	1776	2022	0.878338
GUT_GENOME001112	GUT_GENOME095966	99.0445	1755	2022	0.867953
GUT_GENOME001112	GUT_GENOME152117	99.044	1681	2022	0.831355
GUT_GENOME001112	GUT_GENOME077320	99.0399	1424	2022	0.704253
GUT_GENOME001112	GUT_GENOME095722	99.0271	1663	2022	0.822453
GUT_GENOME001112	GUT_GENOME095730	99.0259	1704	2022	0.84273
GUT_GENOME001112	GUT_GENOME252300	99.0256	1588	2022	0.785361
GUT_GENOME001112	GUT_GENOME096485	99.018	1779	2022	0.879822
GUT_GENOME001112	GUT_GENOME117204	98.9972	1592	2022	0.787339
GUT_GENOME001112	GUT_GENOME140112	98.9854	1725	2022	0.853116
GUT_GENOME001112	GUT_GENOME098408	98.9835	1432	2022	0.70821
GUT_GENOME001112	GUT_GENOME095362	98.981	1624	2022	0.803165
GUT_GENOME001112	GUT_GENOME193301	98.9784	1589	2022	0.785856
GUT_GENOME001112	GUT_GENOME044987	98.9777	1437	2022	0.710682
GUT_GENOME001112	GUT_GENOME095227	98.9719	1680	2022	0.830861
GUT_GENOME001112	GUT_GENOME037030	98.9644	1597	2022	0.789812
GUT_GENOME001112	GUT_GENOME124434	98.9614	1481	2022	0.732443
GUT_GENOME001112	GUT_GENOME220206	98.8916	1250	2022	0.6182
GUT_GENOME001112	GUT_GENOME181724	97.9088	1482	2022	0.732938
GUT_GENOME001112	GUT_GENOME159351	97.67	1466	2022	0.725025
GUT_GENOME001112	GUT_GENOME033081	97.4807	1341	2022	0.663205
GUT_GENOME001112	GUT_GENOME185076	97.4632	1420	2022	0.702275
GUT_GENOME001112	GUT_GENOME035701	97.4393	1495	2022	0.739367
GUT_GENOME001112	GUT_GENOME231061	97.3937	1498	2022	0.740851
GUT_GENOME001112	GUT_GENOME036091	97.3864	1497	2022	0.740356
GUT_GENOME001112	GUT_GENOME027720	97.3756	1571	2022	0.776954
GUT_GENOME001112	GUT_GENOME152717	97.375	1531	2022	0.757171
GUT_GENOME001112	GUT_GENOME045131	97.3349	1501	2022	0.742334
GUT_GENOME001112	GUT_GENOME243118	97.3237	1514	2022	0.748764
GUT_GENOME001112	GUT_GENOME052472	97.3189	1489	2022	0.7364
GUT_GENOME001112	GUT_GENOME001318	97.3041	1647	2022	0.81454
GUT_GENOME001112	GUT_GENOME151464	97.3038	1361	2022	0.673096
GUT_GENOME001112	GUT_GENOME245604	97.298	1558	2022	0.770524
GUT_GENOME001112	GUT_GENOME244206	97.2891	1479	2022	0.731454
GUT_GENOME001112	GUT_GENOME030183	97.2785	1445	2022	0.714639
GUT_GENOME001112	GUT_GENOME157020	97.2735	1565	2022	0.773986
GUT_GENOME001112	GUT_GENOME096695	97.2686	1442	2022	0.713155
GUT_GENOME001112	GUT_GENOME249723	97.2636	1523	2022	0.753215
GUT_GENOME001112	GUT_GENOME264278	97.2618	1374	2022	0.679525
GUT_GENOME001112	GUT_GENOME248181	97.261	1458	2022	0.721068
GUT_GENOME001112	GUT_GENOME184932	97.2609	1309	2022	0.647379
GUT_GENOME001112	GUT_GENOME185158	97.2525	1388	2022	0.686449
GUT_GENOME001112	GUT_GENOME073256	97.2506	1473	2022	0.728487
GUT_GENOME001112	GUT_GENOME001151	97.2325	1659	2022	0.820475
GUT_GENOME001112	GUT_GENOME073659	97.229	1465	2022	0.72453
GUT_GENOME001112	GUT_GENOME094359	97.2003	1574	2022	0.778437
GUT_GENOME001112	GUT_GENOME121439	97.1998	1429	2022	0.706726
GUT_GENOME001112	GUT_GENOME185659	97.1929	1339	2022	0.662216
GUT_GENOME001112	GUT_GENOME062272	97.162	1368	2022	0.676558
GUT_GENOME001112	GUT_GENOME098450	97.1478	1444	2022	0.714144
GUT_GENOME001112	GUT_GENOME156209	97.1227	1460	2022	0.722057
GUT_GENOME001112	GUT_GENOME286431	97.1171	1466	2022	0.725025
GUT_GENOME001112	GUT_GENOME031388	97.1129	1415	2022	0.699802
GUT_GENOME001112	GUT_GENOME098830	97.1012	1355	2022	0.670129
GUT_GENOME001112	GUT_GENOME004964	91.8652	843	2022	0.416914
GUT_GENOME001112	GUT_GENOME096670	91.8118	981	2022	0.485163
GUT_GENOME001112	GUT_GENOME199160	91.8097	902	2022	0.446093
GUT_GENOME001112	GUT_GENOME088312	91.8096	964	2022	0.476756
GUT_GENOME001112	GUT_GENOME179340	91.5784	996	2022	0.492582
GUT_GENOME001112	GUT_GENOME098299	91.5762	1051	2022	0.519782
GUT_GENOME001112	GUT_GENOME073769	91.5141	1056	2022	0.522255
GUT_GENOME001112	GUT_GENOME074771	91.511	1099	2022	0.543521
GUT_GENOME001112	GUT_GENOME170020	91.4603	1057	2022	0.52275
GUT_GENOME001112	GUT_GENOME120028	91.4516	1059	2022	0.523739
GUT_GENOME001112	GUT_GENOME005956	91.3851	990	2022	0.489614
GUT_GENOME001112	GUT_GENOME167970	91.3788	1048	2022	0.518299
GUT_GENOME001112	GUT_GENOME034186	91.3722	1068	2022	0.52819
GUT_GENOME001112	GUT_GENOME268316	91.3612	1109	2022	0.548467
GUT_GENOME001112	GUT_GENOME000086	91.359	1153	2022	0.570227
GUT_GENOME001112	GUT_GENOME000016	91.3579	1228	2022	0.607319
GUT_GENOME001112	GUT_GENOME055234	91.3574	1061	2022	0.524728
GUT_GENOME001112	GUT_GENOME000208	91.3538	1183	2022	0.585064
GUT_GENOME001112	GUT_GENOME045747	91.3512	1138	2022	0.562809
GUT_GENOME001112	GUT_GENOME148802	91.349	1142	2022	0.564787
GUT_GENOME001112	GUT_GENOME243801	91.3256	1101	2022	0.54451
GUT_GENOME001112	GUT_GENOME168104	91.3236	1129	2022	0.558358
GUT_GENOME001112	GUT_GENOME120132	91.3102	1163	2022	0.575173
GUT_GENOME001112	GUT_GENOME136948	91.2941	1081	2022	0.534619
GUT_GENOME001112	GUT_GENOME120250	91.2934	1178	2022	0.582591
GUT_GENOME001112	GUT_GENOME256003	91.2899	1161	2022	0.574184
GUT_GENOME001112	GUT_GENOME096487	91.2874	1223	2022	0.604847
GUT_GENOME001112	GUT_GENOME098087	91.2864	1123	2022	0.555391
GUT_GENOME001112	GUT_GENOME166270	91.265	1142	2022	0.564787
GUT_GENOME001112	GUT_GENOME029519	91.2605	1142	2022	0.564787
GUT_GENOME001112	GUT_GENOME122019	91.2552	1169	2022	0.57814
GUT_GENOME001112	GUT_GENOME136562	91.2503	1181	2022	0.584075
GUT_GENOME001112	GUT_GENOME098672	91.2362	939	2022	0.464392
GUT_GENOME001112	GUT_GENOME000434	91.2327	1157	2022	0.572206
GUT_GENOME001112	GUT_GENOME096228	91.2263	1245	2022	0.615727
GUT_GENOME001112	GUT_GENOME107090	91.2082	1123	2022	0.555391
GUT_GENOME001112	GUT_GENOME004087	91.2019	1083	2022	0.535608
GUT_GENOME001112	GUT_GENOME179317	91.2018	1099	2022	0.543521
GUT_GENOME001112	GUT_GENOME176873	91.128	1050	2022	0.519288
GUT_GENOME001112	GUT_GENOME165151	91.1235	1032	2022	0.510386
GUT_GENOME001112	GUT_GENOME020409	91.0464	1003	2022	0.496044
GUT_GENOME001135	GUT_GENOME001135	100	2127	2130	0.998592
GUT_GENOME001135	GUT_GENOME000181	99.4018	1835	2130	0.861502
GUT_GENOME001135	GUT_GENOME085738	99.3403	1662	2130	0.780282
GUT_GENOME001135	GUT_GENOME000657	99.2793	1834	2130	0.861033
GUT_GENOME001135	GUT_GENOME096486	99.2717	1834	2130	0.861033
GUT_GENOME001135	GUT_GENOME096223	99.2411	1799	2130	0.844601
GUT_GENOME001151	GUT_GENOME001151	100	2154	2155	0.999536
GUT_GENOME001151	GUT_GENOME185076	99.6836	1620	2155	0.75174
GUT_GENOME001151	GUT_GENOME184932	99.6276	1475	2155	0.684455
GUT_GENOME001151	GUT_GENOME249723	98.9436	1638	2155	0.760093
GUT_GENOME001151	GUT_GENOME151464	98.841	1461	2155	0.677958
GUT_GENOME001151	GUT_GENOME096695	98.8155	1540	2155	0.714617
GUT_GENOME001151	GUT_GENOME231061	98.791	1637	2155	0.759629
GUT_GENOME001151	GUT_GENOME243118	98.7707	1656	2155	0.768445
GUT_GENOME001151	GUT_GENOME073659	98.7682	1550	2155	0.719258
GUT_GENOME001151	GUT_GENOME248181	98.7585	1614	2155	0.748956
GUT_GENOME001151	GUT_GENOME045131	98.7051	1629	2155	0.755916
GUT_GENOME001151	GUT_GENOME245604	98.6898	1702	2155	0.789791
GUT_GENOME001151	GUT_GENOME098450	98.6793	1573	2155	0.72993
GUT_GENOME001151	GUT_GENOME185659	98.6716	1419	2155	0.658469
GUT_GENOME001151	GUT_GENOME073256	98.6689	1619	2155	0.751276
GUT_GENOME001151	GUT_GENOME156209	98.6627	1581	2155	0.733643
GUT_GENOME001151	GUT_GENOME035701	98.6567	1552	2155	0.720186
GUT_GENOME001151	GUT_GENOME264278	98.6554	1482	2155	0.687703
GUT_GENOME001151	GUT_GENOME121439	98.652	1557	2155	0.722506
GUT_GENOME001151	GUT_GENOME185158	98.6517	1480	2155	0.686775
GUT_GENOME001151	GUT_GENOME152717	98.6495	1663	2155	0.771694
GUT_GENOME001151	GUT_GENOME033081	98.6391	1443	2155	0.669606
GUT_GENOME001151	GUT_GENOME027720	98.6356	1695	2155	0.786543
GUT_GENOME001151	GUT_GENOME094359	98.6156	1743	2155	0.808817
GUT_GENOME001151	GUT_GENOME030183	98.6144	1561	2155	0.724362
GUT_GENOME001151	GUT_GENOME036091	98.607	1630	2155	0.756381
GUT_GENOME001151	GUT_GENOME001318	98.57	1791	2155	0.83109
GUT_GENOME001151	GUT_GENOME062272	98.5652	1490	2155	0.691415
GUT_GENOME001151	GUT_GENOME052472	98.5595	1555	2155	0.721578
GUT_GENOME001151	GUT_GENOME031388	98.5496	1555	2155	0.721578
GUT_GENOME001151	GUT_GENOME159351	98.5475	1501	2155	0.69652
GUT_GENOME001151	GUT_GENOME157020	98.5377	1739	2155	0.806961
GUT_GENOME001151	GUT_GENOME286431	98.5306	1633	2155	0.757773
GUT_GENOME001151	GUT_GENOME098830	98.5164	1479	2155	0.686311
GUT_GENOME001151	GUT_GENOME181724	98.5116	1504	2155	0.697912
GUT_GENOME001151	GUT_GENOME244206	98.4766	1610	2155	0.7471
GUT_GENOME001151	GUT_GENOME065909	97.5756	1543	2155	0.716009
GUT_GENOME001151	GUT_GENOME044987	97.4452	1437	2155	0.666821
GUT_GENOME001151	GUT_GENOME027435	97.4323	1536	2155	0.712761
GUT_GENOME001151	GUT_GENOME046307	97.4145	1475	2155	0.684455
GUT_GENOME001151	GUT_GENOME117204	97.4127	1557	2155	0.722506
GUT_GENOME001151	GUT_GENOME037030	97.3913	1576	2155	0.731323
GUT_GENOME001151	GUT_GENOME095362	97.3824	1565	2155	0.726218
GUT_GENOME001151	GUT_GENOME220206	97.3784	1227	2155	0.569374
GUT_GENOME001151	GUT_GENOME098408	97.3652	1423	2155	0.660325
GUT_GENOME001151	GUT_GENOME124434	97.3369	1449	2155	0.67239
GUT_GENOME001151	GUT_GENOME097863	97.3269	1635	2155	0.758701
GUT_GENOME001151	GUT_GENOME045504	97.3264	1601	2155	0.742923
GUT_GENOME001151	GUT_GENOME194873	97.3213	1593	2155	0.739211
GUT_GENOME001151	GUT_GENOME195156	97.3095	1571	2155	0.729002
GUT_GENOME001151	GUT_GENOME185925	97.3041	1517	2155	0.703944
GUT_GENOME001151	GUT_GENOME153694	97.2978	1582	2155	0.734107
GUT_GENOME001151	GUT_GENOME045324	97.2946	1526	2155	0.708121
GUT_GENOME001151	GUT_GENOME097768	97.2941	1514	2155	0.702552
GUT_GENOME001151	GUT_GENOME058686	97.2919	1581	2155	0.733643
GUT_GENOME001151	GUT_GENOME019941	97.2898	1575	2155	0.730858
GUT_GENOME001151	GUT_GENOME157694	97.2838	1456	2155	0.675638
GUT_GENOME001151	GUT_GENOME097244	97.2749	1511	2155	0.70116
GUT_GENOME001151	GUT_GENOME098013	97.2693	1516	2155	0.70348
GUT_GENOME001151	GUT_GENOME077320	97.2674	1425	2155	0.661253
GUT_GENOME001151	GUT_GENOME097940	97.2646	1520	2155	0.705336
GUT_GENOME001151	GUT_GENOME185944	97.2548	1557	2155	0.722506
GUT_GENOME001151	GUT_GENOME252300	97.2482	1511	2155	0.70116
GUT_GENOME001151	GUT_GENOME185454	97.2476	1515	2155	0.703016
GUT_GENOME001151	GUT_GENOME034591	97.2451	1472	2155	0.683063
GUT_GENOME001151	GUT_GENOME193301	97.2404	1568	2155	0.72761
GUT_GENOME001151	GUT_GENOME178516	97.2395	1566	2155	0.726682
GUT_GENOME001151	GUT_GENOME185813	97.2395	1424	2155	0.660789
GUT_GENOME001151	GUT_GENOME034086	97.2383	1413	2155	0.655684
GUT_GENOME001151	GUT_GENOME095722	97.2342	1557	2155	0.722506
GUT_GENOME001151	GUT_GENOME155633	97.2261	1585	2155	0.735499
GUT_GENOME001151	GUT_GENOME229936	97.2254	1545	2155	0.716937
GUT_GENOME001151	GUT_GENOME261771	97.2145	1544	2155	0.716473
GUT_GENOME001151	GUT_GENOME029595	97.2066	1466	2155	0.680278
GUT_GENOME001151	GUT_GENOME031778	97.1879	1611	2155	0.747564
GUT_GENOME001151	GUT_GENOME095227	97.1796	1602	2155	0.743387
GUT_GENOME001151	GUT_GENOME097996	97.1754	1539	2155	0.714153
GUT_GENOME001151	GUT_GENOME095730	97.1748	1605	2155	0.74478
GUT_GENOME001151	GUT_GENOME057664	97.1737	1603	2155	0.743852
GUT_GENOME001151	GUT_GENOME045232	97.1716	1563	2155	0.72529
GUT_GENOME001151	GUT_GENOME001112	97.168	1653	2155	0.767053
GUT_GENOME001151	GUT_GENOME149670	97.1673	1436	2155	0.666357
GUT_GENOME001151	GUT_GENOME226088	97.1639	1345	2155	0.62413
GUT_GENOME001151	GUT_GENOME239717	97.1626	1730	2155	0.802784
GUT_GENOME001151	GUT_GENOME152117	97.1523	1603	2155	0.743852
GUT_GENOME001151	GUT_GENOME231288	97.1511	1435	2155	0.665893
GUT_GENOME001151	GUT_GENOME029472	97.1432	1424	2155	0.660789
GUT_GENOME001151	GUT_GENOME225887	97.1431	1526	2155	0.708121
GUT_GENOME001151	GUT_GENOME124071	97.1396	1528	2155	0.709049
GUT_GENOME001151	GUT_GENOME000823	97.1368	1689	2155	0.783759
GUT_GENOME001151	GUT_GENOME263206	97.1269	1390	2155	0.645012
GUT_GENOME001151	GUT_GENOME246487	97.1217	1366	2155	0.633875
GUT_GENOME001151	GUT_GENOME231242	97.1208	1431	2155	0.664037
GUT_GENOME001151	GUT_GENOME178318	97.1181	1585	2155	0.735499
GUT_GENOME001151	GUT_GENOME097693	97.116	1560	2155	0.723898
GUT_GENOME001151	GUT_GENOME096864	97.1131	1438	2155	0.667285
GUT_GENOME001151	GUT_GENOME097823	97.1115	1372	2155	0.636659
GUT_GENOME001151	GUT_GENOME095966	97.0941	1692	2155	0.785151
GUT_GENOME001151	GUT_GENOME158182	97.093	1609	2155	0.746636
GUT_GENOME001151	GUT_GENOME157744	97.0658	1453	2155	0.674246
GUT_GENOME001151	GUT_GENOME096485	97.0465	1723	2155	0.799536
GUT_GENOME001151	GUT_GENOME231790	97.039	1450	2155	0.672854
GUT_GENOME001151	GUT_GENOME001033	97.0334	1651	2155	0.766125
GUT_GENOME001151	GUT_GENOME096883	97.0303	1565	2155	0.726218
GUT_GENOME001151	GUT_GENOME140112	96.9868	1646	2155	0.763805
GUT_GENOME001151	GUT_GENOME001696	96.9302	1653	2155	0.767053
GUT_GENOME001151	GUT_GENOME088312	91.843	954	2155	0.442691
GUT_GENOME001151	GUT_GENOME199160	91.8024	905	2155	0.419954
GUT_GENOME001151	GUT_GENOME096670	91.6902	1002	2155	0.464965
GUT_GENOME001151	GUT_GENOME179340	91.5433	1010	2155	0.468677
GUT_GENOME001151	GUT_GENOME098299	91.4403	1052	2155	0.488167
GUT_GENOME001151	GUT_GENOME073769	91.4279	1049	2155	0.486775
GUT_GENOME001151	GUT_GENOME170020	91.3689	1045	2155	0.484919
GUT_GENOME001151	GUT_GENOME074771	91.3624	1106	2155	0.513225
GUT_GENOME001151	GUT_GENOME055234	91.3286	1060	2155	0.491879
GUT_GENOME001151	GUT_GENOME136948	91.3277	1069	2155	0.496056
GUT_GENOME001151	GUT_GENOME034186	91.3237	1079	2155	0.500696
GUT_GENOME001151	GUT_GENOME005956	91.2775	983	2155	0.456148
GUT_GENOME001151	GUT_GENOME120028	91.2722	1054	2155	0.489095
GUT_GENOME001151	GUT_GENOME268316	91.2684	1121	2155	0.520186
GUT_GENOME001151	GUT_GENOME029519	91.2576	1131	2155	0.524826
GUT_GENOME001151	GUT_GENOME122019	91.211	1148	2155	0.532715
GUT_GENOME001151	GUT_GENOME000086	91.2042	1141	2155	0.529466
GUT_GENOME001151	GUT_GENOME098087	91.196	1114	2155	0.516937
GUT_GENOME001151	GUT_GENOME098672	91.1733	922	2155	0.427842
GUT_GENOME001151	GUT_GENOME256003	91.1673	1154	2155	0.535499
GUT_GENOME001151	GUT_GENOME167970	91.1604	1061	2155	0.492343
GUT_GENOME001151	GUT_GENOME045747	91.1547	1142	2155	0.52993
GUT_GENOME001151	GUT_GENOME120132	91.1264	1147	2155	0.532251
GUT_GENOME001151	GUT_GENOME000208	91.1238	1198	2155	0.555916
GUT_GENOME001151	GUT_GENOME179317	91.1064	1109	2155	0.514617
GUT_GENOME001151	GUT_GENOME166270	91.1015	1153	2155	0.535035
GUT_GENOME001151	GUT_GENOME168104	91.0985	1133	2155	0.525754
GUT_GENOME001151	GUT_GENOME148802	91.0873	1132	2155	0.52529
GUT_GENOME001151	GUT_GENOME000434	91.0825	1184	2155	0.54942
GUT_GENOME001151	GUT_GENOME096228	91.0746	1236	2155	0.57355
GUT_GENOME001151	GUT_GENOME120250	91.061	1150	2155	0.533643
GUT_GENOME001151	GUT_GENOME243801	91.0563	1092	2155	0.506729
GUT_GENOME001151	GUT_GENOME107090	91.041	1125	2155	0.522042
GUT_GENOME001151	GUT_GENOME165151	91.0256	1023	2155	0.47471
GUT_GENOME001151	GUT_GENOME136562	91.0175	1152	2155	0.534571
GUT_GENOME001151	GUT_GENOME096487	91.0156	1213	2155	0.562877
GUT_GENOME001151	GUT_GENOME000016	90.9931	1213	2155	0.562877
GUT_GENOME001151	GUT_GENOME004087	90.9299	1082	2155	0.502088
GUT_GENOME001151	GUT_GENOME020409	90.9207	993	2155	0.460789
GUT_GENOME001151	GUT_GENOME176873	90.9134	1038	2155	0.481671
GUT_GENOME001318	GUT_GENOME001318	100	2051	2055	0.998054
GUT_GENOME001318	GUT_GENOME152717	99.9207	1770	2055	0.861314
GUT_GENOME001318	GUT_GENOME245604	99.9092	1818	2055	0.884672
GUT_GENOME001318	GUT_GENOME157020	99.8847	1889	2055	0.919221
GUT_GENOME001318	GUT_GENOME031388	99.8211	1644	2055	0.8
GUT_GENOME001318	GUT_GENOME030183	99.7658	1644	2055	0.8
GUT_GENOME001318	GUT_GENOME098450	99.7486	1669	2055	0.812165
GUT_GENOME001318	GUT_GENOME286431	99.7077	1731	2055	0.842336
GUT_GENOME001318	GUT_GENOME151464	99.7028	1505	2055	0.73236
GUT_GENOME001318	GUT_GENOME073256	99.7016	1712	2055	0.83309
GUT_GENOME001318	GUT_GENOME094359	99.6903	1881	2055	0.915328
GUT_GENOME001318	GUT_GENOME098830	99.6492	1559	2055	0.758637
GUT_GENOME001318	GUT_GENOME231061	99.6087	1649	2055	0.802433
GUT_GENOME001318	GUT_GENOME033081	99.5926	1516	2055	0.737713
GUT_GENOME001318	GUT_GENOME062272	99.5634	1569	2055	0.763504
GUT_GENOME001318	GUT_GENOME036091	99.5614	1694	2055	0.824331
GUT_GENOME001318	GUT_GENOME244206	99.5456	1696	2055	0.825304
GUT_GENOME001318	GUT_GENOME045131	99.5319	1669	2055	0.812165
GUT_GENOME001318	GUT_GENOME121439	99.51	1598	2055	0.777616
GUT_GENOME001318	GUT_GENOME027720	99.0532	1703	2055	0.82871
GUT_GENOME001318	GUT_GENOME035701	98.9229	1563	2055	0.760584
GUT_GENOME001318	GUT_GENOME249723	98.8753	1586	2055	0.771776
GUT_GENOME001318	GUT_GENOME185158	98.85	1469	2055	0.714842
GUT_GENOME001318	GUT_GENOME243118	98.7839	1575	2055	0.766423
GUT_GENOME001318	GUT_GENOME096695	98.7355	1467	2055	0.713869
GUT_GENOME001318	GUT_GENOME185659	98.7298	1397	2055	0.679805
GUT_GENOME001318	GUT_GENOME073659	98.7188	1510	2055	0.734793
GUT_GENOME001318	GUT_GENOME185076	98.7184	1489	2055	0.724574
GUT_GENOME001318	GUT_GENOME248181	98.6985	1549	2055	0.753771
GUT_GENOME001318	GUT_GENOME156209	98.6694	1575	2055	0.766423
GUT_GENOME001318	GUT_GENOME001151	98.6233	1786	2055	0.8691
GUT_GENOME001318	GUT_GENOME052472	98.6047	1515	2055	0.737226
GUT_GENOME001318	GUT_GENOME184932	98.5989	1353	2055	0.658394
GUT_GENOME001318	GUT_GENOME264278	98.5983	1421	2055	0.691484
GUT_GENOME001318	GUT_GENOME181724	98.5275	1499	2055	0.72944
GUT_GENOME001318	GUT_GENOME159351	98.4896	1513	2055	0.736253
GUT_GENOME001318	GUT_GENOME065909	97.634	1542	2055	0.750365
GUT_GENOME001318	GUT_GENOME046307	97.5373	1498	2055	0.728954
GUT_GENOME001318	GUT_GENOME044987	97.5105	1420	2055	0.690998
GUT_GENOME001318	GUT_GENOME034086	97.4709	1431	2055	0.69635
GUT_GENOME001318	GUT_GENOME037030	97.4647	1565	2055	0.761557
GUT_GENOME001318	GUT_GENOME252300	97.4641	1497	2055	0.728467
GUT_GENOME001318	GUT_GENOME019941	97.4552	1605	2055	0.781022
GUT_GENOME001318	GUT_GENOME153694	97.4538	1555	2055	0.756691
GUT_GENOME001318	GUT_GENOME220206	97.4464	1200	2055	0.583942
GUT_GENOME001318	GUT_GENOME157694	97.4297	1414	2055	0.688078
GUT_GENOME001318	GUT_GENOME185944	97.4295	1582	2055	0.76983
GUT_GENOME001318	GUT_GENOME124434	97.427	1440	2055	0.70073
GUT_GENOME001318	GUT_GENOME095722	97.4269	1584	2055	0.770803
GUT_GENOME001318	GUT_GENOME045504	97.4261	1554	2055	0.756204
GUT_GENOME001318	GUT_GENOME097768	97.4241	1529	2055	0.744039
GUT_GENOME001318	GUT_GENOME027435	97.423	1524	2055	0.741606
GUT_GENOME001318	GUT_GENOME098013	97.4166	1497	2055	0.728467
GUT_GENOME001318	GUT_GENOME058686	97.4119	1554	2055	0.756204
GUT_GENOME001318	GUT_GENOME095730	97.4072	1648	2055	0.801946
GUT_GENOME001318	GUT_GENOME185925	97.4069	1560	2055	0.759124
GUT_GENOME001318	GUT_GENOME117204	97.4034	1560	2055	0.759124
GUT_GENOME001318	GUT_GENOME178516	97.4006	1540	2055	0.749392
GUT_GENOME001318	GUT_GENOME195156	97.3918	1560	2055	0.759124
GUT_GENOME001318	GUT_GENOME194873	97.3917	1543	2055	0.750852
GUT_GENOME001318	GUT_GENOME097996	97.376	1541	2055	0.749878
GUT_GENOME001318	GUT_GENOME045324	97.3729	1545	2055	0.751825
GUT_GENOME001318	GUT_GENOME124071	97.3703	1530	2055	0.744526
GUT_GENOME001318	GUT_GENOME097863	97.3667	1601	2055	0.779075
GUT_GENOME001318	GUT_GENOME261771	97.3659	1589	2055	0.773236
GUT_GENOME001318	GUT_GENOME001112	97.3613	1633	2055	0.794647
GUT_GENOME001318	GUT_GENOME229936	97.3606	1505	2055	0.73236
GUT_GENOME001318	GUT_GENOME029595	97.3587	1471	2055	0.715815
GUT_GENOME001318	GUT_GENOME095362	97.3561	1549	2055	0.753771
GUT_GENOME001318	GUT_GENOME000823	97.3547	1670	2055	0.812652
GUT_GENOME001318	GUT_GENOME097244	97.3522	1513	2055	0.736253
GUT_GENOME001318	GUT_GENOME057664	97.3482	1602	2055	0.779562
GUT_GENOME001318	GUT_GENOME185454	97.3325	1574	2055	0.765937
GUT_GENOME001318	GUT_GENOME226088	97.3245	1352	2055	0.657908
GUT_GENOME001318	GUT_GENOME246487	97.3229	1342	2055	0.653041
GUT_GENOME001318	GUT_GENOME077320	97.3205	1406	2055	0.684185
GUT_GENOME001318	GUT_GENOME001033	97.3204	1683	2055	0.818978
GUT_GENOME001318	GUT_GENOME193301	97.32	1547	2055	0.752798
GUT_GENOME001318	GUT_GENOME158182	97.318	1601	2055	0.779075
GUT_GENOME001318	GUT_GENOME097823	97.314	1363	2055	0.66326
GUT_GENOME001318	GUT_GENOME045232	97.3137	1586	2055	0.771776
GUT_GENOME001318	GUT_GENOME157744	97.31	1454	2055	0.707543
GUT_GENOME001318	GUT_GENOME239717	97.309	1682	2055	0.818491
GUT_GENOME001318	GUT_GENOME097693	97.3018	1559	2055	0.758637
GUT_GENOME001318	GUT_GENOME098408	97.2978	1390	2055	0.676399
GUT_GENOME001318	GUT_GENOME185813	97.2861	1433	2055	0.697324
GUT_GENOME001318	GUT_GENOME225887	97.2853	1472	2055	0.716302
GUT_GENOME001318	GUT_GENOME152117	97.283	1630	2055	0.793187
GUT_GENOME001318	GUT_GENOME155633	97.2712	1550	2055	0.754258
GUT_GENOME001318	GUT_GENOME095227	97.267	1582	2055	0.76983
GUT_GENOME001318	GUT_GENOME231242	97.2612	1382	2055	0.672506
GUT_GENOME001318	GUT_GENOME034591	97.2566	1466	2055	0.713382
GUT_GENOME001318	GUT_GENOME149670	97.2553	1401	2055	0.681752
GUT_GENOME001318	GUT_GENOME263206	97.2535	1414	2055	0.688078
GUT_GENOME001318	GUT_GENOME231790	97.2463	1429	2055	0.695377
GUT_GENOME001318	GUT_GENOME096864	97.2433	1463	2055	0.711922
GUT_GENOME001318	GUT_GENOME031778	97.2397	1562	2055	0.760097
GUT_GENOME001318	GUT_GENOME231288	97.2368	1433	2055	0.697324
GUT_GENOME001318	GUT_GENOME140112	97.2119	1624	2055	0.790268
GUT_GENOME001318	GUT_GENOME097940	97.2029	1539	2055	0.748905
GUT_GENOME001318	GUT_GENOME178318	97.1946	1566	2055	0.762044
GUT_GENOME001318	GUT_GENOME096883	97.1844	1543	2055	0.750852
GUT_GENOME001318	GUT_GENOME029472	97.1485	1392	2055	0.677372
GUT_GENOME001318	GUT_GENOME001696	97.1174	1676	2055	0.815572
GUT_GENOME001318	GUT_GENOME096485	97.0999	1721	2055	0.83747
GUT_GENOME001318	GUT_GENOME095966	97.0895	1689	2055	0.821898
GUT_GENOME001318	GUT_GENOME088312	91.9607	955	2055	0.46472
GUT_GENOME001318	GUT_GENOME096670	91.8295	986	2055	0.479805
GUT_GENOME001318	GUT_GENOME004964	91.8157	829	2055	0.403406
GUT_GENOME001318	GUT_GENOME199160	91.7845	903	2055	0.439416
GUT_GENOME001318	GUT_GENOME179340	91.5741	1017	2055	0.494891
GUT_GENOME001318	GUT_GENOME098299	91.4811	1064	2055	0.517762
GUT_GENOME001318	GUT_GENOME120028	91.4592	1048	2055	0.509976
GUT_GENOME001318	GUT_GENOME034186	91.4547	1082	2055	0.526521
GUT_GENOME001318	GUT_GENOME073769	91.4524	1050	2055	0.510949
GUT_GENOME001318	GUT_GENOME136948	91.4183	1069	2055	0.520195
GUT_GENOME001318	GUT_GENOME074771	91.3168	1104	2055	0.537226
GUT_GENOME001318	GUT_GENOME029519	91.3002	1137	2055	0.553285
GUT_GENOME001318	GUT_GENOME045747	91.293	1150	2055	0.559611
GUT_GENOME001318	GUT_GENOME170020	91.2916	1074	2055	0.522628
GUT_GENOME001318	GUT_GENOME000016	91.285	1208	2055	0.587835
GUT_GENOME001318	GUT_GENOME243801	91.2663	1079	2055	0.525061
GUT_GENOME001318	GUT_GENOME122019	91.2645	1147	2055	0.558151
GUT_GENOME001318	GUT_GENOME005956	91.2574	987	2055	0.480292
GUT_GENOME001318	GUT_GENOME168104	91.2516	1133	2055	0.551338
GUT_GENOME001318	GUT_GENOME148802	91.2455	1143	2055	0.556204
GUT_GENOME001318	GUT_GENOME120250	91.2426	1151	2055	0.560097
GUT_GENOME001318	GUT_GENOME268316	91.2136	1132	2055	0.550852
GUT_GENOME001318	GUT_GENOME256003	91.2071	1153	2055	0.561071
GUT_GENOME001318	GUT_GENOME107090	91.2032	1121	2055	0.545499
GUT_GENOME001318	GUT_GENOME179317	91.2003	1112	2055	0.541119
GUT_GENOME001318	GUT_GENOME098087	91.1944	1123	2055	0.546472
GUT_GENOME001318	GUT_GENOME098672	91.193	937	2055	0.455961
GUT_GENOME001318	GUT_GENOME166270	91.1808	1151	2055	0.560097
GUT_GENOME001318	GUT_GENOME120132	91.1743	1154	2055	0.561557
GUT_GENOME001318	GUT_GENOME000208	91.1637	1169	2055	0.568856
GUT_GENOME001318	GUT_GENOME000434	91.1578	1167	2055	0.567883
GUT_GENOME001318	GUT_GENOME000086	91.1367	1151	2055	0.560097
GUT_GENOME001318	GUT_GENOME167970	91.1341	1066	2055	0.518735
GUT_GENOME001318	GUT_GENOME096487	91.1323	1207	2055	0.587348
GUT_GENOME001318	GUT_GENOME096228	91.1265	1211	2055	0.589294
GUT_GENOME001318	GUT_GENOME136562	91.1139	1140	2055	0.554745
GUT_GENOME001318	GUT_GENOME055234	91.1074	1078	2055	0.524574
GUT_GENOME001318	GUT_GENOME165151	91.0918	1042	2055	0.507056
GUT_GENOME001318	GUT_GENOME176873	91.0345	1028	2055	0.500243
GUT_GENOME001318	GUT_GENOME020409	91.0086	982	2055	0.477859
GUT_GENOME001318	GUT_GENOME004087	91.0035	1087	2055	0.528954
GUT_GENOME001612	GUT_GENOME001612	100	1146	1147	0.999128
GUT_GENOME001612	GUT_GENOME155719	99.2644	913	1147	0.79599
GUT_GENOME001612	GUT_GENOME245596	98.7388	706	1147	0.615519
GUT_GENOME001612	GUT_GENOME285661	98.7087	760	1147	0.662598
GUT_GENOME001612	GUT_GENOME098705	98.681	800	1147	0.697472
GUT_GENOME001612	GUT_GENOME283455	98.6753	753	1147	0.656495
GUT_GENOME001612	GUT_GENOME057353	98.6747	770	1147	0.671316
GUT_GENOME001612	GUT_GENOME040663	98.6714	882	1147	0.768963
GUT_GENOME001612	GUT_GENOME117148	98.6004	819	1147	0.714037
GUT_GENOME001612	GUT_GENOME137265	98.5884	847	1147	0.738448
GUT_GENOME001612	GUT_GENOME118385	98.5399	835	1147	0.727986
GUT_GENOME001612	GUT_GENOME094961	98.5056	728	1147	0.634699
GUT_GENOME001612	GUT_GENOME096047	98.2163	975	1147	0.850044
GUT_GENOME001696	GUT_GENOME001696	100	2189	2195	0.997267
GUT_GENOME001696	GUT_GENOME097693	99.5102	1689	2195	0.769476
GUT_GENOME001696	GUT_GENOME225887	99.3578	1636	2195	0.74533
GUT_GENOME001696	GUT_GENOME096864	99.345	1570	2195	0.715262
GUT_GENOME001696	GUT_GENOME231288	99.3307	1566	2195	0.71344
GUT_GENOME001696	GUT_GENOME231242	99.3014	1542	2195	0.702506
GUT_GENOME001696	GUT_GENOME045324	99.169	1569	2195	0.714806
GUT_GENOME001696	GUT_GENOME153694	99.1684	1615	2195	0.735763
GUT_GENOME001696	GUT_GENOME045504	99.1523	1648	2195	0.750797
GUT_GENOME001696	GUT_GENOME097863	99.1517	1673	2195	0.762187
GUT_GENOME001696	GUT_GENOME095722	99.1278	1649	2195	0.751253
GUT_GENOME001696	GUT_GENOME229936	99.1225	1562	2195	0.711617
GUT_GENOME001696	GUT_GENOME019941	99.1199	1630	2195	0.742597
GUT_GENOME001696	GUT_GENOME065909	99.1177	1561	2195	0.711162
GUT_GENOME001696	GUT_GENOME096883	99.1167	1643	2195	0.748519
GUT_GENOME001696	GUT_GENOME195156	99.1104	1623	2195	0.739408
GUT_GENOME001696	GUT_GENOME034086	99.109	1511	2195	0.688383
GUT_GENOME001696	GUT_GENOME157694	99.108	1477	2195	0.672893
GUT_GENOME001696	GUT_GENOME178516	99.1061	1605	2195	0.731207
GUT_GENOME001696	GUT_GENOME029595	99.1051	1494	2195	0.680638
GUT_GENOME001696	GUT_GENOME095730	99.1047	1708	2195	0.778132
GUT_GENOME001696	GUT_GENOME194873	99.1037	1624	2195	0.739863
GUT_GENOME001696	GUT_GENOME097940	99.0936	1602	2195	0.729841
GUT_GENOME001696	GUT_GENOME097244	99.0902	1590	2195	0.724374
GUT_GENOME001696	GUT_GENOME246487	99.0891	1409	2195	0.641913
GUT_GENOME001696	GUT_GENOME231790	99.0819	1520	2195	0.692483
GUT_GENOME001696	GUT_GENOME046307	99.0772	1527	2195	0.695672
GUT_GENOME001696	GUT_GENOME097768	99.0769	1598	2195	0.728018
GUT_GENOME001696	GUT_GENOME158182	99.073	1681	2195	0.765831
GUT_GENOME001696	GUT_GENOME057664	99.0704	1667	2195	0.759453
GUT_GENOME001696	GUT_GENOME239717	99.0692	1757	2195	0.800456
GUT_GENOME001696	GUT_GENOME185944	99.0617	1629	2195	0.742141
GUT_GENOME001696	GUT_GENOME152117	99.0583	1705	2195	0.776765
GUT_GENOME001696	GUT_GENOME034591	99.0554	1529	2195	0.696583
GUT_GENOME001696	GUT_GENOME001112	99.0549	1755	2195	0.799544
GUT_GENOME001696	GUT_GENOME098013	99.0535	1542	2195	0.702506
GUT_GENOME001696	GUT_GENOME097823	99.0458	1421	2195	0.64738
GUT_GENOME001696	GUT_GENOME261771	99.0347	1649	2195	0.751253
GUT_GENOME001696	GUT_GENOME185925	99.0336	1614	2195	0.735308
GUT_GENOME001696	GUT_GENOME031778	99.031	1584	2195	0.72164
GUT_GENOME001696	GUT_GENOME149670	99.0286	1468	2195	0.668793
GUT_GENOME001696	GUT_GENOME185454	99.016	1612	2195	0.734396
GUT_GENOME001696	GUT_GENOME124071	99.0043	1574	2195	0.717084
GUT_GENOME001696	GUT_GENOME001033	98.9989	1802	2195	0.820957
GUT_GENOME001696	GUT_GENOME027435	98.9984	1571	2195	0.715718
GUT_GENOME001696	GUT_GENOME155633	98.9946	1658	2195	0.755353
GUT_GENOME001696	GUT_GENOME097996	98.9937	1587	2195	0.723007
GUT_GENOME001696	GUT_GENOME029472	98.9909	1462	2195	0.666059
GUT_GENOME001696	GUT_GENOME140112	98.9884	1801	2195	0.820501
GUT_GENOME001696	GUT_GENOME263206	98.9883	1470	2195	0.669704
GUT_GENOME001696	GUT_GENOME157744	98.9841	1521	2195	0.692938
GUT_GENOME001696	GUT_GENOME000823	98.9769	1787	2195	0.814123
GUT_GENOME001696	GUT_GENOME185813	98.9708	1473	2195	0.671071
[truncated: 26,979 more rows]
